# Supplementary material for: Integrated Pan-Cancer Map of EBV-Associated Neoplasms Reveals Functional Host–Virus Interactions
Source: Oxford University Press journal article supplement (doi:10.1158/0008-5472.can-19-0615), 2019-09-03
Supplement: 00085472can190615-sup-217692_3_supp_5723851_pwpnf4.xlsx [file 00085472can190615-sup-217692_3_supp_5723851_pwpnf4.xlsx]

## Sheet: A
Table S5A. List of differentially expressed genes in AITL
Gene	Expr_mean(EBV–)	Expr_mean(EBV+)	logFC	PValue	FDR
RGS13	2.9927	18.0144	2.59886	1.87286e-149	3.91027e-146
RPSAP58	38.2877	5.59353	-2.77757	2.26986e-122	3.686e-119
MEF2B	3.55846	17.4439	2.26479	4.02625e-116	4.90363e-113
CD1E	8.21438	1.292	-2.72335	8.01382e-91	6.01638e-88
ELL3	5.43466	19.4327	1.85699	3.02582e-82	2.01011e-79
HLA-DQB2	11.483	2.40742	-2.33661	1.47902e-72	8.31379e-70
TCL1A	23.2868	72.8572	1.635	2.28101e-69	1.11123e-66
AICDA	2.59805	8.53915	1.73179	8.47257e-67	3.9944e-64
NEIL1	2.72574	8.73451	1.74195	1.83291e-60	7.24001e-58
CD19	25.8167	70.886	1.43382	1.61932e-54	5.14485e-52
TLR9	1.58082	4.71967	1.58299	1.3633e-53	4.23929e-51
TNFRSF13B	7.28583	20.7046	1.5329	4.03596e-53	1.22887e-50
PAX5	9.4474	24.972	1.36665	1.17657e-50	3.12646e-48
BCL7A	4.37023	11.862	1.4275	1.66497e-50	4.34527e-48
IL1R2	19.3804	6.3271	-1.61868	2.40786e-50	6.12592e-48
TNFRSF13C	6.31788	17.7131	1.58351	4.46661e-49	1.03618e-46
STAP1	8.02897	20.9533	1.41256	6.07686e-46	1.20018e-43
FCRLA	13.575	34.3665	1.3288	1.91543e-45	3.68343e-43
CD22	36.4568	88.4754	1.23742	9.07952e-42	1.56114e-39
SH2B2	6.37179	15.9402	1.29618	1.93587e-41	3.28986e-39
ARID3A	5.04834	12.3537	1.26728	1.40052e-39	2.24929e-37
SNX29P1	1.98944	5.52678	1.77808	5.33937e-39	8.27383e-37
LYL1	9.76569	23.5145	1.23263	5.37813e-39	8.27383e-37
TLR10	9.48165	22.3568	1.2194	8.16378e-39	1.24285e-36
FUT7	5.03859	12.2978	1.24815	1.89993e-38	2.83341e-36
CD180	15.3079	35.6279	1.19681	9.47385e-38	1.34428e-35
POU2F2	11.0258	25.4265	1.17691	1.16307e-37	1.61888e-35
BLNK	15.7475	36.8257	1.21106	1.22706e-37	1.689e-35
BANK1	22.8669	52.8562	1.17766	2.3233e-37	3.08682e-35
ANKLE1	1.56645	4.06653	1.32879	2.89716e-37	3.81459e-35
BCL11A	3.37892	7.92353	1.23644	1.31104e-36	1.66616e-34
SLC17A9	8.52519	19.2391	1.16599	2.23822e-34	2.61692e-32
CD79A	93.952	207.145	1.1036	2.30367e-33	2.58986e-31
LAMP3	34.9819	15.056	-1.23778	2.67813e-33	2.98785e-31
VPREB3	13.3914	30.4065	1.28279	4.75963e-33	5.1912e-31
BHLHA15	2.65283	7.55416	1.52014	8.64581e-33	9.29106e-31
MS4A1	83.3867	182.474	1.08446	1.03026e-32	1.09907e-30
EHD3	5.06849	11.2516	1.13561	2.52514e-32	2.65503e-30
DUSP1	75.5461	33.5309	-1.19501	1.48151e-31	1.52481e-29
SNX22	3.10878	6.82833	1.1621	2.04655e-30	2.02097e-28
E2F5	5.60554	12.3978	1.16138	4.95084e-30	4.72919e-28
LAT2	20.7351	43.8968	1.05923	7.35504e-30	6.93509e-28
CPNE5	9.8001	20.8708	1.07526	8.47633e-30	7.89055e-28
SNORA73B	0.809755	7.16644	2.94007	1.4582e-29	1.34884e-27
FAM129C	7.9294	16.8141	1.10462	3.64543e-29	3.32988e-27
KIAA0226L	7.36544	15.5156	1.06346	5.72532e-29	5.19724e-27
EGLN3	7.68902	3.40393	-1.19634	2.51166e-28	2.18499e-26
ATF3	10.4373	4.64584	-1.19075	3.65791e-28	3.10816e-26
ADGRG5	4.80712	10.1433	1.06978	5.72532e-28	4.78146e-26
AKR1C3	6.09706	2.35641	-1.36151	1.1982e-27	9.83802e-26
DOK3	26.4751	53.8516	0.998818	4.09661e-27	3.28967e-25
TREML2	5.15583	10.5452	1.03565	2.47135e-26	1.92122e-24
HBEGF	4.20906	1.7808	-1.25951	4.5015e-26	3.44447e-24
PLCG2	15.4556	30.6682	0.959648	1.38646e-25	1.02858e-23
UCHL1	6.17246	12.997	1.10783	2.08802e-25	1.54123e-23
BCAS4	7.41564	15.3636	1.06116	2.57642e-25	1.86408e-23
ITGAM	11.9741	5.8047	-1.06345	9.30633e-25	6.60252e-23
NR4A1	11.414	5.49049	-1.08188	1.37253e-24	9.69056e-23
LMO2	16.896	33.3191	0.953524	5.58352e-24	3.83113e-22
MYBL2	40.5313	78.3333	0.924286	8.90984e-24	6.05662e-22
CD79B	71.4388	139.022	0.927563	1.33313e-23	8.89665e-22
POU2AF1	48.1774	92.829	0.915052	2.53352e-23	1.65301e-21
PHACTR1	2.02693	4.14948	1.09142	7.3581e-23	4.67559e-21
JADE3	2.57952	5.08601	0.981602	1.32563e-22	8.31505e-21
CLEC17A	5.14264	10.0048	1.02196	1.64523e-22	1.02319e-20
COBLL1	3.27428	6.31838	0.929459	1.7393e-22	1.07711e-20
F3	5.72079	2.76543	-1.10183	1.38722e-21	8.0453e-20
GPT2	2.44636	4.81712	0.973141	1.42954e-21	8.25799e-20
SLC25A4	2.5625	4.99063	0.961242	2.20773e-21	1.25062e-19
MEF2C	13.3883	25.1079	0.875496	4.01777e-21	2.22423e-19
PNOC	5.5108	10.9934	1.05578	6.4285e-21	3.50569e-19
RHOBTB2	6.61564	12.3811	0.885633	7.89315e-21	4.25676e-19
MICAL3	4.90637	9.05941	0.863232	4.1233e-20	2.15221e-18
NAPSB	37.5185	69.1684	0.855546	5.62812e-20	2.92722e-18
FKBP4	24.6235	44.071	0.818475	7.74234e-19	3.62674e-17
MAFF	8.32144	4.4139	-0.946556	1.245e-18	5.79479e-17
BRI3BP	5.65041	10.8047	0.913558	1.4811e-18	6.82848e-17
CLECL1	6.93986	13.2819	0.966598	2.83322e-18	1.29398e-16
NT5DC2	18.7605	33.7076	0.823694	3.0382e-18	1.38328e-16
PHGDH	11.4122	20.6023	0.839898	4.95758e-18	2.22939e-16
GNG7	3.10283	5.60309	0.875978	1.13172e-17	4.87909e-16
TCF3	26.4173	46.5046	0.788992	1.31175e-17	5.60562e-16
BACH2	2.51386	4.4928	0.828772	1.59477e-17	6.73627e-16
ICA1	16.6412	9.21042	-0.883467	2.18901e-17	9.14068e-16
ZNF296	3.24287	6.22612	0.916969	2.40829e-17	9.99919e-16
ERRFI1	5.77495	3.1349	-0.913681	3.72007e-17	1.52722e-15
BEND5	2.33569	4.43663	0.992765	5.25946e-17	2.14114e-15
SYVN1	26.1598	45.1773	0.761763	2.63429e-16	1.02123e-14
LRMP	35.6194	61.5139	0.759788	2.66188e-16	1.02919e-14
CXXC5	9.17663	16.315	0.805607	4.20761e-16	1.60559e-14
CNR2	3.71155	6.62081	0.906402	5.62496e-16	2.13529e-14
RALGPS2	9.08752	15.6778	0.758166	8.14179e-16	3.05893e-14
ZBTB32	9.23118	16.0466	0.783677	1.38939e-15	5.12777e-14
BTK	28.021	47.7367	0.741889	2.2634e-15	8.29064e-14
HMGA1	128.884	216.939	0.726047	2.92801e-15	1.06186e-13
HIST1H3H	1.64102	4.22113	1.24226	3.10258e-15	1.12238e-13
KBTBD8	5.47367	9.37282	0.75893	3.12107e-15	1.12628e-13
MCTP1	8.38493	4.86646	-0.806438	3.89021e-15	1.40038e-13
CDCA7L	10.4872	17.7954	0.750889	6.34238e-15	2.25532e-13
NMT2	4.98921	2.88602	-0.820907	6.89821e-15	2.42933e-13
HIP1R	9.76881	16.4961	0.734039	8.74634e-15	3.05078e-13
SLCO4A1	2.97264	5.26515	0.782194	1.00563e-14	3.49936e-13
PIK3C2B	9.25728	15.5352	0.718483	1.46187e-14	4.98023e-13
HHEX	11.6497	19.7551	0.749755	1.65554e-14	5.61386e-13
FCRL4	2.34439	4.02017	0.827354	2.30513e-14	7.74471e-13
RGS1	108.035	65.0054	-0.757499	2.65597e-14	8.82204e-13
DSC2	4.37657	2.58352	-0.784466	9.06559e-14	2.88657e-12
TLE1	3.23255	5.46717	0.735186	1.61515e-13	5.01176e-12
CDC25A	5.09866	8.45854	0.706875	3.24871e-13	9.74947e-12
BASP1	43.3894	70.721	0.677249	3.2916e-13	9.85794e-12
EGR1	35.0621	21.6757	-0.717891	6.03593e-13	1.76078e-11
ICOSLG	5.4905	9.03595	0.70958	6.96042e-13	1.99464e-11
WDFY4	14.5051	23.4558	0.662635	8.90277e-13	2.5314e-11
SIPA1L3	3.83468	6.25099	0.680362	1.01611e-12	2.85038e-11
LRWD1	9.73405	15.9782	0.682534	1.03797e-12	2.90611e-11
CBFA2T3	5.97061	9.72427	0.680703	1.39342e-12	3.84243e-11
SYNE3	3.48312	5.81268	0.706408	1.7027e-12	4.6514e-11
PRKAR2B	11.5534	7.13508	-0.719056	1.79041e-12	4.87279e-11
CTSK	62.0145	38.7458	-0.700506	2.1299e-12	5.73268e-11
SULF2	27.444	17.1408	-0.700246	2.34804e-12	6.28509e-11
IL1R1	20.4285	12.7985	-0.695992	3.16095e-12	8.38426e-11
CSF2RA	30.2836	18.9241	-0.701373	4.19595e-12	1.09899e-10
CYBRD1	28.6737	18.1302	-0.68704	5.10928e-12	1.32163e-10
TPD52	12.5292	20.0104	0.65292	5.90483e-12	1.50609e-10
STRBP	6.71644	10.7014	0.652469	8.19569e-12	2.06162e-10
HSH2D	18.0401	28.705	0.648098	9.31642e-12	2.31564e-10
SEMA7A	20.0838	31.8188	0.638202	9.33869e-12	2.31723e-10
SWAP70	23.5998	37.3749	0.632988	1.0662e-11	2.61013e-10
GABARAPL1	16.9705	10.6221	-0.694842	1.14867e-11	2.79797e-10
ITK	55.9926	35.642	-0.668001	1.57309e-11	3.80012e-10
FLT1	8.70221	5.54361	-0.671842	2.60688e-11	6.15696e-10
TONSL	4.44506	7.05981	0.643053	2.66679e-11	6.28631e-10
ST8SIA1	4.018	2.57122	-0.674564	6.12245e-11	1.3916e-09
HOTAIRM1	4.4336	2.53737	-0.877855	6.67979e-11	1.51357e-09
TTC39B	7.00672	4.43913	-0.676989	7.00136e-11	1.57909e-09
MKNK2	57.5285	88.785	0.60127	8.22707e-11	1.83851e-09
FGD5	4.36279	2.7957	-0.672209	1.41041e-10	3.08581e-09
KLF6	47.777	31.2921	-0.633332	1.42541e-10	3.11395e-09
PPAP2B	21.3188	13.9158	-0.641816	1.55049e-10	3.36569e-09
BOLA2B	16.7974	26.3995	0.627852	1.56149e-10	3.38092e-09
UHRF1	15.9597	24.5172	0.597126	1.71769e-10	3.70813e-09
IL13RA1	33.4419	21.9278	-0.632141	1.82366e-10	3.91953e-09
CHCHD6	8.24123	5.03134	-0.739631	1.85996e-10	3.99167e-09
THRIL	5.39531	8.55238	0.647822	2.26308e-10	4.78653e-09
GIMAP2	70.9216	46.5346	-0.631134	2.62251e-10	5.48325e-09
CCDC102A	3.7267	5.94762	0.645802	3.28109e-10	6.76349e-09
TBC1D8	8.20648	5.34853	-0.644007	3.51745e-10	7.22016e-09
RABEP2	11.6179	17.9307	0.60506	3.52362e-10	7.22269e-09
FADS1	14.5495	9.56975	-0.629342	3.76976e-10	7.68411e-09
FRMD4B	11.0211	7.25586	-0.625935	4.04857e-10	8.20664e-09
DPYD	21.299	14.063	-0.622355	4.35758e-10	8.77219e-09
CCDC106	3.99016	6.35055	0.657747	4.80966e-10	9.61603e-09
S100A13	45.5666	29.7306	-0.633667	5.1371e-10	1.02009e-08
CLYBL	4.41559	2.68111	-0.769856	5.5863e-10	1.10628e-08
PRDM15	3.443	5.30036	0.604064	5.71681e-10	1.12633e-08
C10orf10	44.3619	29.5679	-0.61547	6.96642e-10	1.36297e-08
SNHG4	2.41024	4.03499	0.778779	1.12815e-09	2.13852e-08
GLIPR2	47.2575	31.6373	-0.601405	1.532e-09	2.8559e-08
PHLDA1	5.67039	3.75354	-0.621327	1.62929e-09	3.02184e-08
IER3	46.0886	30.8052	-0.6039	1.67258e-09	3.09037e-08
DLG3	5.72012	3.78614	-0.62377	1.78432e-09	3.27611e-08
SMIM3	6.28397	4.09195	-0.642645	2.23206e-09	4.0224e-08
DOCK1	5.46268	3.65062	-0.608853	2.42191e-09	4.33777e-08
HAS2	4.68656	3.05029	-0.630697	2.8022e-09	5.00662e-08
SLC27A2	4.00176	6.20492	0.594839	4.06358e-09	7.11248e-08
ARL4A	6.98897	4.64395	-0.614229	5.60544e-09	9.60416e-08
LOC154761	8.50926	5.71224	-0.608236	8.80483e-09	1.45404e-07
ST5	5.79197	3.8952	-0.601315	9.03076e-09	1.48799e-07
GPR176	5.0261	3.372	-0.604163	9.96623e-09	1.63109e-07
OSBPL1A	6.79324	4.60215	-0.587555	1.37553e-08	2.21403e-07
MAP1LC3C	4.14534	2.56153	-0.723298	1.93557e-08	3.04504e-07
HS3ST1	3.5812	5.39613	0.592641	6.10973e-08	8.73715e-07
FAIM	5.73267	8.63558	0.586813	1.04101e-07	1.41793e-06
HIST2H4A	3.42156	5.59651	0.701011	3.76138e-06	3.75239e-05
HIST2H4B	3.42156	5.59651	0.701011	3.76138e-06	3.75239e-05

## Sheet: B
Table S5B. List of differentially expressed genes in eBL
Gene	Expr_mean(EBV–)	Expr_mean(EBV+)	logFC	PValue	FDR
NWD2	5.56199	0.00296901	-10.9186	0	0
SHISA2	21.627	0.0889669	-8.0261	2.48E-313	5.36E-310
PAGE5	52.7918	0.0511244	-10.0387	6.16e-307	1.1639e-303
LOC152225	12.1881	0.0137295	-9.74378	6.80417e-272	1.0275e-268
UPK1A	22.4613	0.0448649	-9.48297	3.83085e-268	5.25906e-265
ADGRA3	18.4355	0.246366	-6.32416	8.96176e-253	9.66654e-250
NFASC	11.6469	0.165363	-6.26325	3.49323e-233	2.63757e-230
C10orf99	199.886	4.80036	-5.555	1.48106e-219	8.9462e-217
PTGER3	4.54	0.0671671	-6.21347	2.32819e-212	1.25564e-209
STX19	23.9607	0.320301	-6.72914	3.67439e-207	1.7899e-204
RNASE7	50.7287	1.159	-5.66961	3.09201e-205	1.41492e-202
AKR1C1	67.1989	1.62916	-5.56521	4.71223e-204	2.09292e-201
LOC101929128	16.2911	0.0181461	-9.88388	2.77359e-200	1.16344e-197
FGFBP1	118.599	4.22252	-4.946	5.98467e-180	1.8828e-177
APOBEC3A_B	19.0604	0.292567	-6.19874	2.26107e-179	6.96825e-177
DEFB4A	555.467	20.4577	-4.92395	2.40427e-178	7.26139e-176
UST	8.49095	0.242118	-5.2301	2.75807e-173	7.57265e-171
GJB6	213.976	8.51784	-4.75401	1.37752e-171	3.64946e-169
KPRP	18.4713	0.578381	-5.11398	1.71737e-168	4.05219e-166
MPZL2	211.691	8.8549	-4.69406	5.15612e-168	1.19789e-165
IL36RN	87.1977	3.67758	-4.70114	4.66974e-165	1.0074e-162
AKR1B10	140.487	5.94798	-4.70459	2.07298e-164	4.40903e-162
SERPINB4	97.2528	4.02583	-4.6976	3.43905e-164	7.21294e-162
KLK7	105.125	4.56234	-4.65146	1.00482e-161	1.99655e-159
GPX2	23.5682	0.607492	-5.44733	1.48435e-160	2.87374e-158
PERP	623.079	28.4083	-4.54825	2.21948e-160	4.24257e-158
TMEM45B	45.7502	1.94389	-4.71764	1.6094e-159	2.96385e-157
SPRR2F	807.925	36.7585	-4.55897	2.68987e-159	4.89394e-157
SDR16C5	36.3185	1.5852	-4.67319	6.92497e-158	1.23028e-155
FAM134B	9.48872	0.322426	-4.98365	3.23291e-156	5.36486e-154
MAL2	184.887	8.71255	-4.52297	4.05164e-156	6.65042e-154
DSG3	150.92	7.21369	-4.49362	1.11763e-155	1.79547e-153
S100A2	862.443	41.0517	-4.48853	1.44031e-155	2.28949e-153
ZBTB7C	5.30362	0.157436	-5.25082	2.25572e-150	3.40636e-148
NMB	29.9235	1.11152	-4.91237	4.63872e-150	6.86758e-148
GBP6	47.8103	2.36666	-4.46065	8.33326e-150	1.22175e-147
CERS3	25.5169	1.20905	-4.56862	2.63939e-149	3.72499e-147
KIF21A	8.94284	0.392892	-4.70553	1.60941e-148	2.2297e-146
BTBD11	10.2636	0.419725	-4.79735	6.70205e-147	9.11781e-145
LOC101927189	8.41098	0.27701	-5.32774	1.11481e-146	1.5031e-144
COL17A1	22.987	1.15335	-4.4362	1.39312e-146	1.86172e-144
LYPD5	36.299	1.78525	-4.49613	7.45239e-146	9.8718e-144
LYPD3	343.614	18.2911	-4.33046	1.22896e-144	1.55954e-142
ATP9A	11.9044	0.61685	-4.39874	1.44114e-143	1.79856e-141
SNX31	4.67426	0.0696035	-6.33741	5.68975e-142	6.98544e-140
SH3RF2	7.90171	0.28193	-5.09065	6.41459e-142	7.81183e-140
MALL	108.918	6.029	-4.29554	3.82467e-141	4.54774e-139
DSP	121.922	6.7916	-4.26386	4.07687e-141	4.80975e-139
TP63	25.8143	1.41502	-4.33665	5.05702e-138	5.69896e-136
ZNF365	7.01945	0.299517	-4.86212	2.93186e-136	3.16243e-134
TMEM171	8.97277	0.214619	-5.5905	3.90006e-136	4.17694e-134
KLK13	271.368	15.6642	-4.21419	5.12428e-136	5.44942e-134
KRT5	1448.51	85.2475	-4.17055	5.86349e-136	6.19192e-134
PROM2	17.6469	0.960466	-4.34556	1.25593e-135	1.31707e-133
TMEM40	60.5856	3.40702	-4.31007	2.62476e-135	2.71482e-133
TSPAN5	20.941	1.1665	-4.30106	9.88714e-135	1.00205e-132
CLDN1	34.4397	1.97833	-4.25585	1.97815e-133	1.97828e-131
FGFR3	21.9964	1.24464	-4.29104	3.99806e-133	3.97202e-131
CYP3A5	13.7296	0.583134	-4.99161	4.49405e-131	4.40679e-129
TTC39B	11.4359	0.577057	-4.45651	6.86987e-131	6.69302e-129
FFAR3	6.23837	0.161145	-5.63843	1.57088e-130	1.52063e-128
MEOX1	21.0949	1.1276	-4.32742	2.39007e-130	2.29888e-128
PRSS22	44.7831	2.53559	-4.31214	2.97745e-130	2.84572e-128
RAB38	33.3482	1.77721	-4.43279	1.12936e-129	1.0659e-127
IL20RB	38.4391	2.25192	-4.25041	1.18104e-129	1.10776e-127
CDH3	16.9562	0.982305	-4.22296	1.20653e-129	1.12468e-127
PDZK1IP1	149.832	9.07702	-4.1673	1.74079e-128	1.5836e-126
HOPX	864.264	56.0198	-4.04562	2.10343e-127	1.87952e-125
NSG1	9.09676	0.381199	-4.82068	5.13099e-127	4.55782e-125
S100A16	497.391	32.5776	-4.02586	1.93156e-125	1.63868e-123
KCNK1	11.2037	0.51722	-4.64642	4.72902e-125	3.96739e-123
WFDC21P	257.84	16.4528	-4.102	5.10617e-125	4.23671e-123
RAET1G	8.40722	0.159889	-5.95998	7.22474e-125	5.96179e-123
IL22RA1	8.24911	0.37482	-4.73212	1.39718e-124	1.14047e-122
PDE9A	7.86311	0.317226	-4.71928	2.19495e-124	1.78204e-122
SPRR2E	3146.08	211.505	-3.98535	3.01753e-124	2.42381e-122
VSNL1	18.8938	1.02322	-4.47113	1.36016e-123	1.08104e-121
SPRR2D	2179.53	146.955	-3.977	1.68109e-123	1.32912e-121
SPRR1A	1977.04	133.147	-3.97551	2.51768e-123	1.98018e-121
RAB25	111.674	7.15587	-4.08603	2.96465e-123	2.31965e-121
RHOD	49.0084	2.97231	-4.21714	7.12581e-123	5.54674e-121
VLDLR	15.8873	1.00644	-4.07689	8.38736e-122	6.46212e-120
AQP3	402.623	27.653	-3.95738	9.52009e-122	7.29761e-120
SCNN1B	11.8533	0.62215	-4.46789	7.58679e-121	5.75719e-119
CD177	136.803	9.35277	-3.96207	2.02985e-120	1.53264e-118
CDH1	28.8161	1.93152	-4.01377	2.13231e-120	1.60199e-118
SPRR2A	4103.78	288.093	-3.91635	4.16197e-120	3.09605e-118
EPHA2	25.156	1.6864	-4.03521	1.46875e-119	1.05617e-117
TPRG1	9.25384	0.509812	-4.39985	1.95553e-119	1.39295e-117
CHMP4C	16.4377	0.889238	-4.55653	4.09253e-119	2.90147e-117
CRNN	949.107	66.8369	-3.90256	4.32696e-119	3.05334e-117
F2RL1	12.9138	0.743658	-4.4079	6.29444e-119	4.42104e-117
SCNN1A	19.6212	1.28065	-4.09699	2.31371e-118	1.61011e-116
GALNT3	16.8106	1.09715	-4.11168	6.42169e-118	4.36819e-116
GRHL3	16.9624	1.03771	-4.1958	1.45132e-117	9.69748e-116
KRT1	26.0085	1.71518	-4.10743	2.75745e-117	1.82633e-115
DHRS3	77.1168	5.5546	-3.91431	3.85985e-117	2.54531e-115
TRIM29	101.846	7.25057	-3.90284	5.88809e-117	3.86592e-115
BNC1	4.80884	0.238658	-4.58824	8.93826e-117	5.84315e-115
RUNX2	14.536	0.992292	-3.97906	1.00318e-116	6.52975e-115
CRYAB	70.5015	4.74794	-4.02356	1.14177e-116	7.3683e-115
RAB27B	7.10456	0.449522	-4.19624	1.24999e-116	8.03238e-115
KLK6	106.974	7.52109	-3.93232	1.40169e-116	8.96906e-115
SLPI	932.642	68.7322	-3.86308	1.28409e-115	8.01286e-114
NCCRP1	87.2263	6.25428	-3.9098	5.24693e-115	3.22089e-113
MAL	625.216	46.0868	-3.84702	6.11703e-115	3.73981e-113
GSDMC	12.0482	0.707457	-4.28729	7.54848e-115	4.59636e-113
DUOXA1	17.1617	1.05706	-4.21244	1.36421e-114	8.27347e-113
PDE8B	4.52641	0.239727	-4.3491	1.7998e-114	1.08715e-112
EPHX3	19.2355	1.14136	-4.27813	4.39326e-114	2.59151e-112
WNT10A	15.6563	1.01468	-4.07602	1.07744e-113	6.282e-112
ELOVL4	7.5581	0.412582	-4.34637	4.34598e-113	2.49539e-111
TGM3	158.402	11.9905	-3.8118	1.75912e-112	1.00243e-110
SH3BGRL2	24.5355	1.81029	-3.91506	2.76073e-112	1.56141e-110
CRCT1	236.66	17.718	-3.85413	7.58911e-112	4.2289e-110
EHF	58.0823	4.42493	-3.82097	8.68238e-112	4.82032e-110
TACSTD2	234.248	17.9285	-3.80037	9.48709e-112	5.24779e-110
LCN2	305.392	23.2525	-3.81519	4.44791e-111	2.43362e-109
LAD1	40.0176	2.97157	-3.86596	5.33187e-111	2.90673e-109
S100A7	2232.79	171.922	-3.77088	7.77903e-111	4.1954e-109
BARX2	13.9964	0.788808	-4.3557	9.00002e-111	4.83663e-109
GGT6	9.25177	0.516716	-4.40692	2.84321e-110	1.5065e-108
BNIPL	29.1143	2.12689	-3.93058	2.49909e-109	1.31954e-107
MPP7	16.5089	1.25731	-3.87259	2.65292e-109	1.39588e-107
FUT2	9.62374	0.603899	-4.13799	4.06396e-109	2.12352e-107
CA2	33.1999	2.47471	-3.88276	5.67596e-109	2.94545e-107
KLK10	77.1265	6.06421	-3.77033	1.31117e-108	6.75766e-107
S100A8	10924.8	881.696	-3.71938	1.59663e-108	8.20094e-107
FAM3D	26.0056	1.68857	-4.18906	3.07594e-108	1.56925e-106
DSC2	98.9777	8.00335	-3.73334	6.92838e-108	3.49918e-106
KRT80	23.9306	1.83763	-3.84791	7.21585e-108	3.63222e-106
PAX9	8.55261	0.523558	-4.23915	1.04135e-107	5.22438e-106
ATP1B1	71.8628	5.755	-3.76518	1.93963e-107	9.66679e-106
CYP2J2	5.41962	0.190225	-5.09717	2.7295e-107	1.35586e-105
RHCG	725.949	58.83	-3.70331	3.51189e-107	1.73879e-105
EMP1	636.94	52.3569	-3.69753	5.89724e-107	2.91027e-105
WWC2	4.76258	0.34461	-3.90408	9.32921e-107	4.58894e-105
PITX2	18.6692	1.28265	-4.04375	5.47021e-106	2.6647e-104
ADIRF	79.543	5.96705	-3.88381	8.73632e-106	4.24203e-104
MET	12.4342	1.01579	-3.73962	1.43874e-105	6.89727e-104
RORA	6.3263	0.500662	-3.79742	1.53175e-105	7.3199e-104
TMEM30B	5.07472	0.304971	-4.2582	1.80842e-105	8.58771e-104
KRT14	3207.08	268.179	-3.65759	5.78055e-105	2.72788e-103
TMPRSS2	14.4933	1.08241	-3.91883	1.22601e-104	5.7319e-103
DUOXA2	13.9446	0.809025	-4.46152	1.33117e-104	6.20434e-103
PRSS27	84.4693	6.80892	-3.75477	1.58404e-104	7.36017e-103
ARHGAP32	4.78932	0.361695	-3.87857	3.83348e-104	1.76492e-102
ADGRF1	5.91491	0.408999	-4.09966	2.18162e-103	9.86366e-102
FAM25C	23.9497	0.744697	-5.44243	2.80213e-103	1.26313e-101
SERPINB2	62.6415	5.17602	-3.72929	6.63575e-103	2.96469e-101
TP53AIP1	5.22997	0.205709	-5.09972	4.07036e-102	1.79203e-100
DEFB103A	80.1234	5.97678	-3.92274	3.76367e-101	1.63319e-99
DEFB103B	80.1234	5.97678	-3.92274	3.76367e-101	1.63319e-99
PLEKHG6	5.11569	0.274615	-4.53992	7.36188e-101	3.17633e-99
FAM110C	6.80389	0.467112	-4.10304	7.94807e-101	3.41948e-99
S100A9	8495.49	750.132	-3.58502	8.40545e-101	3.60598e-99
MYZAP	14.2694	1.05412	-3.94499	1.87373e-100	7.99298e-99
AKR1C2	7.85014	0.532139	-4.06091	2.528e-100	1.07234e-98
GJA1	83.9306	7.45094	-3.61186	2.80334e-100	1.1858e-98
TGM1	111.946	9.82074	-3.60605	4.02337e-100	1.69712e-98
HSPB8	30.2848	2.49394	-3.7278	7.44084e-100	3.12992e-98
CAV2	26.9012	2.30235	-3.67388	9.13752e-100	3.82232e-98
LYPD2	74.5129	5.68878	-3.88788	4.28168e-99	1.7666e-97
TOM1L1	5.63536	0.29331	-4.40002	9.38994e-99	3.85319e-97
TYRO3	4.32551	0.270241	-4.15508	1.13342e-98	4.62589e-97
HOOK1	4.8306	0.350414	-4.05647	1.70581e-98	6.94326e-97
AKR1B15	5.81905	0.227616	-5.05166	2.22369e-98	9.02686e-97
TTC39A	4.23837	0.191528	-4.70296	2.64939e-98	1.07261e-96
FAM25BP	24.4242	0.8217	-5.27761	4.01517e-98	1.62121e-96
ARHGEF5	5.09821	0.377703	-3.88926	5.66127e-98	2.27976e-96
FZD6	21.1233	1.85088	-3.62105	6.21457e-98	2.48929e-96
GPRC5A	15.7998	1.28498	-3.75407	6.7704e-98	2.69762e-96
HPSE	21.3161	1.91797	-3.59364	1.07351e-97	4.25488e-96
CEACAM7	29.992	2.56069	-3.72455	1.10539e-97	4.36978e-96
MAP7	7.07914	0.534999	-3.88221	5.40118e-97	2.10397e-95
CDS1	9.59009	0.79285	-3.81121	5.40586e-97	2.10397e-95
ARHGEF35	7.62973	0.524986	-4.03769	4.61942e-96	1.78409e-94
TPD52L1	27.8654	2.23643	-3.77996	7.41838e-96	2.85051e-94
ESRP2	8.53005	0.66614	-3.83104	7.91747e-96	3.03456e-94
EPHB3	9.23361	0.741959	-3.79427	9.13755e-96	3.49332e-94
AIF1L	26.7574	2.39121	-3.61385	2.07707e-95	7.86111e-94
GNG12	28.7825	2.69262	-3.55102	6.3689e-95	2.38652e-93
CBR3	22.3364	1.65064	-3.95647	7.05783e-95	2.63813e-93
ZNF185	59.508	5.57761	-3.51913	1.28423e-94	4.77664e-93
PARD6G	7.05457	0.548677	-3.82402	2.03413e-94	7.54726e-93
PLAT	24.2444	2.20859	-3.57181	2.15251e-94	7.96694e-93
SPINK5	179.776	17.1266	-3.48488	3.13602e-94	1.15505e-92
SLC24A3	4.89504	0.334047	-4.0075	3.63063e-94	1.33073e-92
GPHN	4.84816	0.371586	-3.80445	4.29961e-94	1.56832e-92
XG	4.72098	0.277052	-4.21304	7.34623e-94	2.67314e-92
C2orf54	23.7441	2.09498	-3.65994	1.6696e-93	6.003e-92
EPHA1	6.43451	0.467844	-3.96379	2.0713e-93	7.42962e-92
CDA	46.1239	3.98425	-3.67646	3.34096e-93	1.1899e-91
SH3PXD2A-AS1	4.66357	0.217725	-4.7073	1.22093e-92	4.32798e-91
CYP2C18	6.83206	0.464549	-4.03486	2.33832e-92	8.25023e-91
LTF	6.61378	0.469375	-3.86009	1.0291e-91	3.62249e-90
ATP6V0A4	4.44227	0.278305	-4.35529	1.14702e-91	4.02816e-90
FBLN7	4.99232	0.313286	-4.09309	1.48885e-91	5.2165e-90
KIAA1522	13.0648	1.16761	-3.61004	2.05251e-91	7.14168e-90
ARNTL2	19.8491	1.96829	-3.46663	6.53663e-91	2.2588e-89
SUSD4	5.7131	0.353031	-4.24679	5.58489e-90	1.92551e-88
ATP13A4	5.49264	0.493686	-3.65114	6.15622e-90	2.11284e-88
EPS8L2	25.0264	2.37968	-3.51077	6.63624e-90	2.27242e-88
KRT6A	2615.41	264.776	-3.37605	2.4853e-89	8.45281e-88
PALMD	16.2612	1.49733	-3.56428	2.70588e-89	9.18236e-88
PSCA	31.4594	2.7211	-3.78725	9.638e-89	3.2415e-87
IL33	27.5742	2.73724	-3.4618	1.20387e-88	4.03991e-87
KRT16P3	9.27304	0.719672	-3.97727	4.52373e-88	1.51135e-86
CDCP1	6.24277	0.57464	-3.55992	4.73249e-88	1.5776e-86
CEACAM19	5.23043	0.316372	-4.33975	6.51975e-88	2.16861e-86
POF1B	24.9489	2.51059	-3.4478	9.78513e-88	3.24759e-86
ANKRD22	11.6523	1.11621	-3.52771	2.92575e-87	9.56314e-86
SOWAHC	15.9769	1.59895	-3.4645	5.11064e-87	1.66327e-85
P2RY1	4.01658	0.267985	-3.99884	6.84781e-87	2.22384e-85
LAMB3	10.8965	1.03962	-3.48275	7.38759e-87	2.39399e-85
KAZN	9.10792	0.8174	-3.63927	8.50218e-87	2.74928e-85
EVPL	17.0261	1.73227	-3.3989	8.36331e-86	2.65883e-84
IL1RN	415.38	44.5098	-3.30528	5.99505e-85	1.89001e-83
FDCSP	374.322	39.6352	-3.30387	1.06942e-84	3.34355e-83
STAP2	18.2465	1.63066	-3.62533	2.59647e-84	8.0844e-83
CLIC3	86.3431	8.78471	-3.41705	3.83246e-84	1.18838e-82
CCDC85C	8.45402	0.859166	-3.41678	3.91576e-84	1.21172e-82
ANXA8L1	26.698	2.69495	-3.44436	1.07791e-83	3.30844e-82
S100A6	1108.98	124.372	-3.26363	6.17456e-83	1.87233e-81
FOXE1	5.04355	0.410042	-3.7775	6.41724e-83	1.94202e-81
TRIM2	6.71107	0.666535	-3.48541	7.2984e-83	2.19986e-81
FERMT1	6.43372	0.61446	-3.47084	8.64775e-83	2.60139e-81
EFNA1	18.5975	1.74467	-3.54868	1.51867e-82	4.55933e-81
STON2	6.222	0.623173	-3.49932	1.99418e-82	5.97503e-81
KRT23	8.89098	0.749791	-3.74136	3.82052e-82	1.14245e-80
EMP2	19.8752	2.18476	-3.31249	4.66483e-82	1.39217e-80
CEACAM1	19.0779	2.0282	-3.3597	9.07942e-82	2.70431e-80
PLEKHA5	6.72903	0.654724	-3.48688	1.46303e-81	4.34051e-80
PLD1	10.5724	1.15251	-3.32248	7.51605e-81	2.20817e-79
ARHGEF4	5.63974	0.512748	-3.72235	3.14053e-80	9.0506e-79
ADAP1	14.4916	1.53129	-3.35636	9.24297e-80	2.63853e-78
PI3	518.249	59.3693	-3.21526	9.61938e-80	2.7408e-78
HES2	4.08315	0.349196	-3.70516	1.00332e-79	2.85333e-78
MDFI	13.3018	1.23723	-3.56467	3.43609e-79	9.73515e-78
PHYHD1	7.88523	0.702411	-3.58432	3.7655e-79	1.06485e-77
GRB7	5.89713	0.475139	-3.92525	5.75102e-79	1.62329e-77
KRT18	12.9395	1.19795	-3.56213	9.72594e-79	2.72995e-77
CGNL1	4.27343	0.430949	-3.43534	9.9649e-79	2.79184e-77
TM4SF1	89.6388	10.4735	-3.21889	1.75779e-78	4.90654e-77
NDRG2	39.9014	4.50556	-3.26063	2.50577e-78	6.94304e-77
NEBL	9.09697	1.02816	-3.30023	3.39675e-78	9.39457e-77
GSTM3	7.3921	0.758563	-3.41026	3.86648e-78	1.06547e-76
S100B	11.2331	0.904166	-3.74247	5.45972e-78	1.50177e-76
HSPB1	497.802	58.5746	-3.16872	9.06548e-78	2.48453e-76
KLK9	4.46837	0.190956	-4.73859	1.41458e-77	3.85587e-76
PHLDA1	24.1034	2.83053	-3.19791	1.42698e-77	3.88266e-76
MUC20	10.5722	1.04452	-3.48697	1.99741e-77	5.40553e-76
PKP3	19.139	2.0968	-3.3017	2.35826e-77	6.37068e-76
WWTR1	15.8844	1.8411	-3.23634	2.5512e-77	6.8796e-76
GNAI1	9.38075	0.974367	-3.40574	3.64796e-77	9.8021e-76
PTPRF	9.77931	1.13142	-3.22557	1.32609e-76	3.5443e-75
TTC22	7.03172	0.599744	-3.77945	3.12842e-76	8.31731e-75
FMO2	12.8584	1.47086	-3.24363	5.38281e-76	1.42607e-74
KLF4	23.1056	2.68357	-3.24719	6.90397e-76	1.81949e-74
PLEK2	7.41433	0.555292	-3.90162	7.61825e-76	2.00424e-74
GPR183	30.0644	3.54538	-3.19941	1.44794e-75	3.76988e-74
SMPD3	5.85168	0.657097	-3.27097	1.46809e-75	3.81577e-74
PTHLH	8.87265	0.771105	-3.63981	1.9887e-75	5.16003e-74
BSPRY	9.81247	1.02447	-3.37948	2.23148e-75	5.78003e-74
TSPAN6	9.34806	1.02893	-3.3431	3.50294e-75	9.04237e-74
ACER1	4.0049	0.089783	-5.59549	5.17898e-75	1.33233e-73
SPINK6	4.84745	0.0451724	-6.63859	9.53898e-75	2.43736e-73
DBNDD1	5.27493	0.41529	-3.88424	2.00541e-74	5.10687e-73
PPIC	29.375	3.29977	-3.27056	2.22533e-74	5.64784e-73
TACC2	6.2032	0.650057	-3.41891	4.47348e-74	1.13156e-72
ICA1	6.36474	0.630629	-3.42691	1.0826e-73	2.72019e-72
TFAP2A	5.20025	0.499422	-3.51615	1.58781e-73	3.97638e-72
TGFA	12.7699	1.52136	-3.19489	3.35967e-73	8.34447e-72
IFI27	315.948	40.1713	-3.09009	9.75198e-73	2.40597e-71
GPX3	210.39	27.4592	-3.05533	4.9743e-72	1.20961e-70
ERBB2	16.1601	2.01865	-3.12531	5.64963e-72	1.37162e-70
LAMC2	8.50591	1.0271	-3.13149	6.12686e-72	1.4851e-70
IL1RAP	9.47089	1.14791	-3.17464	6.6299e-72	1.60446e-70
2017-09-10	25.2986	3.18808	-3.11508	1.13653e-71	2.74604e-70
ATP8B1	4.87715	0.552161	-3.25899	1.36316e-71	3.28835e-70
VSIG10L	16.9076	2.08554	-3.1414	2.58231e-71	6.20947e-70
CYP4F22	4.36672	0.366985	-3.75091	6.96382e-71	1.66393e-69
PCDH1	10.8139	1.27771	-3.20423	7.38993e-71	1.76296e-69
C1orf210	4.794	0.29344	-4.28661	1.34912e-70	3.20836e-69
CSTB	2096.04	280.071	-3.00546	2.43221e-70	5.77498e-69
ME1	13.4042	1.65011	-3.13485	2.47521e-70	5.86785e-69
DSG1-AS1	7.27384	0.315003	-4.84724	2.59657e-70	6.13627e-69
DNAJA4	12.9743	1.61069	-3.12736	1.19816e-69	2.8139e-68
PTN	11.1923	1.16511	-3.37168	2.24577e-69	5.26606e-68
YAP1	15.9591	2.07517	-3.06098	2.9558e-69	6.88819e-68
RNF11	58.606	7.8939	-3.01389	3.66103e-69	8.51853e-68
PRDM1	13.8866	1.79821	-3.07244	4.34869e-69	1.00875e-67
ITGB4	6.22108	0.764861	-3.12632	9.08184e-69	2.09062e-67
TJP1	9.03444	1.16872	-3.05971	1.08586e-68	2.49202e-67
SMAGP	17.949	1.94713	-3.34031	2.01653e-68	4.61389e-67
GSTA4	20.5102	2.42715	-3.21704	3.17753e-68	7.23738e-67
FAM129B	94.4183	12.9226	-2.96137	2.01692e-67	4.52563e-66
TNFAIP8L3	7.2594	0.764817	-3.36754	2.40343e-67	5.37691e-66
PTGR1	36.9485	4.80759	-3.05212	5.26163e-67	1.17365e-65
ALS2CL	6.80079	0.830347	-3.17853	9.12511e-67	2.03242e-65
SPNS2	22.0067	2.9632	-3.00414	1.22255e-66	2.71098e-65
CNKSR3	4.55129	0.48046	-3.3433	1.50157e-66	3.3248e-65
MT1X	187.278	25.6726	-2.99216	2.78358e-66	6.13647e-65
ELL2	30.9787	4.38524	-2.94893	3.13419e-66	6.88928e-65
RGPD5	5.21752	0.685709	-3.02793	4.27293e-66	9.3787e-65
JAG1	12.6671	1.7159	-2.99047	5.38538e-66	1.17862e-64
CHL1	4.56651	0.571328	-3.20056	7.36532e-66	1.60728e-64
LINC01106	4.66069	0.476746	-3.36183	1.70217e-65	3.70381e-64
PGLYRP4	4.52684	0.399922	-3.7468	1.84544e-65	4.00978e-64
SASH1	8.70958	1.19517	-2.99133	2.20252e-65	4.77876e-64
AKR1C3	11.8996	1.27881	-3.36526	2.93723e-65	6.3546e-64
MXD1	30.8801	4.37411	-2.93469	3.0346e-65	6.53716e-64
KCNK6	13.0423	1.70547	-3.04892	3.73044e-65	8.01328e-64
TRIM7	4.32223	0.400361	-3.58714	6.07139e-65	1.29864e-63
SOX7	6.56366	0.779511	-3.18971	9.43745e-65	2.00725e-63
CRY1	7.14054	0.89535	-3.11646	9.53342e-65	2.02481e-63
ADGRL2	7.92235	1.06571	-3.01093	1.62441e-64	3.43079e-63
NCKAP1	21.1563	3.00197	-2.93658	2.39546e-64	5.03814e-63
DNASE1L3	18.0001	2.18913	-3.16094	6.48385e-64	1.35238e-62
UPP1	47.3503	6.66145	-2.95008	7.18155e-64	1.49584e-62
SEMA3F	11.0907	1.47943	-3.02081	7.25212e-64	1.50846e-62
CD59	90.7373	13.4965	-2.87179	7.8956e-64	1.64005e-62
ZNF812	8.5293	0.971655	-3.32215	8.19022e-64	1.69891e-62
PPP1R3C	14.0514	1.8523	-3.10892	1.18349e-63	2.45156e-62
STC1	4.2659	0.515609	-3.17847	1.54359e-63	3.18874e-62
GPR1	4.76086	0.453918	-3.57288	1.81088e-63	3.73071e-62
TUBB6	72.4236	10.4215	-2.89731	1.84424e-63	3.79426e-62
LRG1	14.3837	1.82395	-3.11363	4.85599e-63	9.92291e-62
MYO6	5.69041	0.787635	-2.97759	6.09495e-63	1.2421e-61
LAMA3	4.58287	0.597403	-3.02929	7.7465e-63	1.57443e-61
MPZL3	27.5273	4.0302	-2.90115	1.10096e-62	2.22864e-61
CCL14	47.7665	6.181	-3.04754	1.9155e-62	3.86195e-61
LOC154761	6.2159	0.727043	-3.22319	1.99545e-62	4.01776e-61
PTGFRN	6.12623	0.841971	-2.96711	2.07874e-62	4.1799e-61
NPAS2	4.29535	0.507991	-3.21067	2.77846e-62	5.5573e-61
USP44	0.135214	6.41026	5.5049	2.80964e-62	5.61222e-61
RARG	17.8021	2.4937	-2.95276	2.92481e-62	5.83454e-61
CCND2	12.545	1.84189	-2.88018	2.98316e-62	5.94309e-61
CDK5R1	5.4289	0.70753	-3.07325	3.49209e-62	6.94783e-61
B3GNT5	12.1652	1.71641	-2.95475	4.50168e-62	8.94472e-61
EPS8L1	21.1284	2.95447	-2.95994	5.3153e-62	1.05475e-60
2017-09-05	10.3233	1.28333	-3.13542	5.53788e-62	1.09747e-60
SERPINB1	153.274	23.1936	-2.83178	9.57033e-62	1.89164e-60
SEPW1	80.9011	11.9007	-2.88839	1.46327e-61	2.88094e-60
CEACAM6	32.8805	4.67193	-2.90642	1.93145e-61	3.79282e-60
PDZRN3	6.574	0.851846	-3.05384	7.575e-61	1.4722e-59
ST6GALNAC2	4.37591	0.430425	-3.47458	1.61428e-60	3.1293e-59
MT1E	70.385	9.97385	-2.94271	2.31634e-60	4.47876e-59
HBB	937.522	143.83	-2.79043	3.36203e-60	6.48403e-59
LDLRAD4	4.245	0.627491	-2.87157	1.15206e-59	2.20778e-58
CYB561	10.8324	1.52541	-2.93898	1.22071e-59	2.33637e-58
RNF39	5.43805	0.574605	-3.44912	1.31038e-59	2.50481e-58
CSRP2	38.3913	5.49394	-2.94087	3.23705e-59	6.16428e-58
PPAP2C	4.38066	0.307812	-3.94509	5.07828e-59	9.62198e-58
MANSC1	6.91315	0.855484	-3.11807	8.04047e-59	1.51584e-57
MYOF	12.8573	1.99274	-2.79679	8.5787e-59	1.6153e-57
PRR5	6.96553	0.893786	-3.08848	1.99774e-58	3.73365e-57
NDRG1	104.519	16.6709	-2.75865	2.2561e-58	4.2009e-57
HIST2H2BE	9.82681	1.37775	-2.97481	2.36187e-58	4.39245e-57
HSPA4L	5.17022	0.670464	-3.07691	1.38383e-57	2.54224e-56
ERV3-1	7.77609	1.11319	-2.91119	1.73084e-57	3.17201e-56
IFFO2	11.5441	1.80248	-2.79687	1.92839e-57	3.52977e-56
PLK2	13.1386	1.98462	-2.84839	1.96124e-56	3.51324e-55
UPK3B	5.87444	0.61309	-3.47703	3.32698e-56	5.9316e-55
KRT16P1	4.00219	0.424124	-3.52532	7.55516e-56	1.34382e-54
LPAR6	42.2826	6.93426	-2.73922	1.1876e-55	2.10987e-54
GTSF1	42.4578	6.87131	-2.7524	1.309e-55	2.32283e-54
FRMD6	15.3993	2.44688	-2.77368	1.53755e-55	2.72199e-54
GLTP	145.328	24.5382	-2.68958	1.85603e-55	3.27811e-54
SH3D19	9.76428	1.52615	-2.80067	2.02035e-55	3.56418e-54
RAPGEFL1	9.2383	1.3947	-2.84395	2.18448e-55	3.84922e-54
CRB3	8.21104	0.805865	-3.55968	4.78631e-55	8.39467e-54
PLS3	44.9214	7.44699	-2.70265	5.78637e-55	1.01251e-53
CADM4	4.97069	0.594932	-3.19243	1.24854e-54	2.17464e-53
ACKR1	15.4924	2.37626	-2.81005	2.17298e-54	3.76742e-53
HBA1	235.283	39.1926	-2.67173	3.30783e-54	5.71529e-53
ZSCAN31	4.19206	0.534184	-3.15756	4.82136e-54	8.30187e-53
PROS1	9.72214	1.53047	-2.7858	4.84967e-54	8.3411e-53
YES1	9.2647	1.4882	-2.75208	4.89946e-54	8.41715e-53
INPP1	15.9925	2.5218	-2.76452	8.66153e-54	1.48465e-52
SPRY2	8.98419	1.34216	-2.86628	1.22284e-53	2.09129e-52
TSPAN7	11.4082	1.75081	-2.80218	3.37202e-53	5.71503e-52
CRYM	5.7023	0.656817	-3.22523	1.2235e-52	2.06206e-51
PTPRM	7.5563	1.26403	-2.68712	1.9991e-52	3.35801e-51
GIPC1	59.5019	10.3154	-2.64465	3.03706e-52	5.08455e-51
MYLK	25.6143	4.42728	-2.65867	3.35252e-52	5.60648e-51
GPR68	8.63934	1.36184	-2.76274	8.72339e-52	1.44127e-50
FCER1A	5.58082	0.578474	-3.55196	1.02784e-51	1.69263e-50
ITGA3	7.153	1.20097	-2.68014	1.19706e-51	1.96915e-50
IGFBP5	31.1765	5.59687	-2.59351	3.15336e-51	5.16473e-50
ERO1L	111.545	20.4249	-2.58131	3.31162e-51	5.41807e-50
PPBP	4.11673	0.463592	-3.42783	4.46857e-51	7.27939e-50
HEBP2	85.1495	15.1123	-2.61447	8.22615e-51	1.33573e-49
FGF11	10.599	1.7329	-2.73655	1.52599e-50	2.47253e-49
STMN3	11.0851	1.854	-2.68358	1.75588e-50	2.84197e-49
THBD	14.1959	2.48059	-2.63565	2.53647e-50	4.10099e-49
ST5	7.54805	1.21624	-2.71638	2.92526e-50	4.71948e-49
ARHGAP23	5.54255	0.926632	-2.67613	4.06635e-50	6.54648e-49
TMEM173	24.9968	4.38821	-2.61746	4.32217e-50	6.95091e-49
S100A11	1011.76	189.613	-2.52178	7.86148e-49	1.2444e-47
FNDC4	6.20992	0.856192	-2.98526	1.07379e-48	1.69439e-47
H2AFJ	18.5688	3.39318	-2.5663	1.99227e-48	3.12737e-47
ETHE1	40.5578	7.21461	-2.60892	2.47621e-48	3.87896e-47
AJUBA	5.02055	0.802088	-2.74247	5.01437e-48	7.81444e-47
DHX32	10.8388	1.89055	-2.64234	5.40362e-48	8.41237e-47
ACTG2	7.20764	1.07037	-2.8398	6.48522e-48	1.00754e-46
IRF4	30.1524	5.83438	-2.51341	6.56152e-48	1.01835e-46
TIAM1	11.4948	2.16509	-2.53167	9.13338e-48	1.41605e-46
CXCR2	11.2455	1.92698	-2.66526	1.00949e-47	1.56351e-46
PLBD1	41.5636	7.73145	-2.54762	1.01307e-47	1.56746e-46
EML1	4.35039	0.716224	-2.70298	1.33158e-47	2.05606e-46
BAIAP2	10.3208	1.81328	-2.62054	1.53456e-47	2.36704e-46
MTUS1	9.37009	1.67895	-2.59816	1.77215e-47	2.72796e-46
EGLN3	12.3801	2.19006	-2.61499	2.48525e-47	3.81787e-46
TEAD3	4.34569	0.65882	-2.81675	6.01969e-47	9.21007e-46
ABHD17C	26.3531	4.94997	-2.54252	6.29041e-47	9.61452e-46
KIAA1217	5.12778	0.918418	-2.58011	7.01311e-47	1.07083e-45
C5orf66-AS1	4.31315	0.298776	-4.01298	7.26902e-47	1.10878e-45
DUSP5	17.9919	3.33238	-2.56409	1.37534e-46	2.09365e-45
SH3PXD2A	7.34223	1.41346	-2.50989	1.44703e-46	2.19835e-45
GNAQ	11.7433	2.24723	-2.50273	1.59103e-46	2.41469e-45
DOC2B	4.34552	0.572758	-2.95344	2.10788e-46	3.19269e-45
ANXA3	13.0785	2.22053	-2.69074	9.8459e-46	1.47211e-44
PHLDA3	9.18604	1.4707	-2.73856	1.05909e-45	1.58193e-44
ATG9B	4.40757	0.759485	-2.72694	1.09388e-45	1.63228e-44
C9orf3	12.078	2.25447	-2.54574	1.39326e-45	2.07491e-44
MAP1LC3A	15.512	2.55729	-2.71243	2.21231e-45	3.27851e-44
H1F0	60.553	11.9533	-2.45781	2.41293e-45	3.56881e-44
CAMK4	7.08276	1.27248	-2.62414	4.1394e-45	6.10441e-44
RXRA	12.7252	2.48392	-2.4732	4.5048e-45	6.63031e-44
DHCR24	62.9359	12.7555	-2.43323	4.99459e-45	7.3369e-44
TNFSF10	86.5336	17.2414	-2.44087	8.34703e-45	1.21668e-43
IVL	65.4289	12.6621	-2.44411	1.67541e-44	2.43273e-43
PTPN13	8.44651	1.65026	-2.47433	2.10109e-44	3.03623e-43
AFAP1L2	7.58719	1.43185	-2.52479	2.45168e-44	3.53947e-43
HBEGF	10.2389	1.92272	-2.5439	3.72042e-44	5.35067e-43
MXRA7	39.0058	7.82965	-2.43496	9.77785e-44	1.39561e-42
CYP2S1	4.36497	0.70602	-2.69665	1.19986e-43	1.71097e-42
RBP1	23.2909	4.2189	-2.57517	1.50985e-43	2.1449e-42
GALNT11	11.3912	2.17904	-2.49348	1.58692e-43	2.24804e-42
FAM3B	8.53534	1.37561	-2.74769	1.64634e-43	2.33003e-42
MGST2	54.2674	10.6306	-2.47268	1.7612e-43	2.49025e-42
SH3YL1	25.2454	5.01323	-2.4541	3.39285e-43	4.77942e-42
LCE3A	6.63212	0.0945512	-6.01532	3.94006e-43	5.53478e-42
GDPD3	16.8859	3.0304	-2.60031	3.97987e-43	5.58551e-42
TMEM45A	13.1753	2.40749	-2.5423	7.77833e-43	1.08659e-41
FAM46C	11.4458	2.39246	-2.39694	8.60375e-43	1.19968e-41
ITM2B	438.363	93.144	-2.36153	9.77608e-43	1.36189e-41
DUSP16	6.92823	1.39841	-2.42958	1.42502e-42	1.97787e-41
KCNJ15	4.65958	0.786739	-2.69962	1.50494e-42	2.08688e-41
PORCN	6.56954	1.14083	-2.6394	1.61998e-42	2.24229e-41
FBXO32	5.00876	0.998662	-2.44009	4.6843e-42	6.43069e-41
BOK	5.66415	0.994573	-2.60736	9.47882e-42	1.29656e-40
RND3	29.6898	6.10714	-2.40192	1.14686e-41	1.56589e-40
CAPN2	38.9968	8.33396	-2.34695	2.65448e-41	3.59509e-40
TNFRSF25	4.4899	0.696811	-2.79556	2.99652e-41	4.04021e-40
STARD10	12.3419	2.40235	-2.47799	3.99295e-41	5.37411e-40
HIF1A-AS2	26.1022	5.24281	-2.415	5.21082e-41	6.98212e-40
TSPO	82.6035	17.3162	-2.36349	5.22977e-41	7.0013e-40
TPBG	4.89096	0.874613	-2.55856	1.11885e-40	1.49255e-39
GRB10	5.54889	1.11849	-2.40756	1.57922e-40	2.09007e-39
ARHGAP10	10.0924	2.0752	-2.39724	2.23122e-40	2.94267e-39
CRISP3	7.37251	1.38312	-2.64609	3.24264e-40	4.26542e-39
LMF1	9.51625	1.8687	-2.44245	3.72554e-40	4.89638e-39
PPFIBP1	5.6432	1.17174	-2.38261	4.54294e-40	5.95511e-39
AMOTL2	5.14264	1.0246	-2.42485	5.76499e-40	7.54394e-39
ID1	21.714	4.26571	-2.45642	7.87082e-40	1.0264e-38
SVIL	6.41249	1.34641	-2.36159	1.03994e-39	1.35264e-38
IL6ST	20.5424	4.56816	-2.29004	1.11216e-39	1.44533e-38
AQP1	47.4204	10.4839	-2.29487	1.63682e-39	2.11623e-38
SNX33	6.74127	1.3375	-2.43126	3.21269e-39	4.13949e-38
SYNGR1	5.78634	1.01051	-2.65388	4.74031e-39	6.08185e-38
CAV1	37.6727	8.42	-2.27906	1.21485e-38	1.55207e-37
DST	11.3462	2.56382	-2.2732	1.28461e-38	1.63981e-37
CAMK2N1	8.74495	1.74729	-2.42601	1.76829e-38	2.25342e-37
DUSP10	15.2251	3.28686	-2.32345	2.04686e-38	2.60621e-37
KRT8	4.09944	0.732888	-2.58655	3.49705e-38	4.44519e-37
ADGRG1	7.23011	1.50068	-2.36772	3.52176e-38	4.47285e-37
SNX9	14.5485	3.2664	-2.2746	6.90584e-38	8.70493e-37
NMRK1	33.7505	7.41324	-2.30474	7.09233e-38	8.93255e-37
SPN	9.93727	2.20889	-2.26301	9.24394e-38	1.15941e-36
MAGEH1	21.8542	4.7706	-2.30667	1.10574e-37	1.38227e-36
LMO7	18.0773	4.14372	-2.24028	1.71489e-37	2.13667e-36
NOTCH3	5.5431	1.21878	-2.28282	1.9526e-37	2.42286e-36
SOCS2	4.12537	0.769888	-2.5153	1.98502e-37	2.46107e-36
VWA1	8.20855	1.77515	-2.3027	2.18883e-37	2.70931e-36
VPS37B	14.5722	3.247	-2.29378	2.42365e-37	2.99505e-36
NOL3	5.21348	0.870897	-2.65887	2.69623e-37	3.32917e-36
HIST1H1C	47.1945	10.4078	-2.30473	2.95544e-37	3.64625e-36
C15orf62	6.90741	1.39387	-2.40795	5.22915e-37	6.40432e-36
KLF3	10.1734	2.30645	-2.25627	7.72096e-37	9.43319e-36
HIST1H2AC	26.0545	5.25531	-2.46045	1.22811e-36	1.49081e-35
ARRDC3	42.0357	9.9413	-2.20582	1.52947e-36	1.85514e-35
CLIP4	14.1484	3.26641	-2.23739	2.39225e-36	2.88772e-35
ANKRD35	4.08441	0.822192	-2.49669	3.53728e-36	4.26309e-35
COCH	1.73897	17.1546	3.14225	3.92683e-36	4.7288e-35
ANXA2	634.291	153.14	-2.17139	5.37885e-36	6.45676e-35
OPTN	35.4037	8.3808	-2.19416	6.02782e-36	7.23003e-35
DNAJC12	1.67292	19.2346	3.46838	8.19374e-36	9.79681e-35
CRIP2	24.8638	5.55785	-2.26191	1.64094e-35	1.94963e-34
PCYOX1	13.8948	3.33958	-2.18779	3.10474e-35	3.67434e-34
KCTD1	10.5338	2.28297	-2.31562	4.97523e-35	5.86961e-34
ARHGEF3	17.4868	4.20913	-2.17975	5.144e-35	6.06398e-34
TPSAB1	5.54677	1.02281	-2.41341	9.05782e-35	1.06115e-33
CTNND1	24.0775	5.85238	-2.15223	1.13683e-34	1.32771e-33
SNCG	6.80264	1.13351	-2.65108	1.24381e-34	1.45041e-33
CXCL1	69.9381	16.3722	-2.17785	1.35593e-34	1.5775e-33
CLTB	99.2488	24.1752	-2.14917	1.86882e-34	2.17084e-33
SULF2	19.0649	4.63641	-2.15616	3.34044e-34	3.86544e-33
LNX1	5.00592	1.0984	-2.30142	1.64449e-33	1.8799e-32
CD58	20.7778	4.79768	-2.22205	2.37977e-33	2.71018e-32
SIAE	11.6165	2.78186	-2.17089	2.4245e-33	2.75903e-32
HSBP1L1	5.60268	0.796999	-2.83558	2.60082e-33	2.95301e-32
HIST1H2BK	74.1011	18.5041	-2.13081	2.97761e-33	3.37069e-32
RAB15	6.11216	1.41817	-2.17419	4.41059e-33	4.96306e-32
RAB7B	7.73965	1.62446	-2.31951	6.40276e-33	7.17803e-32
CMTM7	27.2203	6.61018	-2.14702	6.46231e-33	7.23942e-32
APLNR	10.644	2.57704	-2.14921	6.68783e-33	7.4865e-32
ECHDC2	5.78863	1.16522	-2.40779	8.84134e-33	9.88254e-32
LTBR	16.3254	3.94387	-2.15584	1.1515e-32	1.28426e-31
LOC283070	4.67019	1.05219	-2.25779	1.53125e-32	1.70526e-31
TMBIM1	114.337	30.146	-2.05594	6.15761e-32	6.76263e-31
VWF	15.4789	3.98036	-2.06232	6.34947e-32	6.96826e-31
BACE2	4.04339	1.00086	-2.11864	6.89984e-32	7.56678e-31
CPD	13.1359	3.41768	-2.063	8.90845e-32	9.73419e-31
CYTL1	4.26479	0.644266	-2.78001	9.21408e-32	1.00609e-30
BAG3	15.4651	3.84494	-2.10787	1.00704e-31	1.09879e-30
FRMD4B	5.72017	1.43149	-2.11023	1.70027e-31	1.84984e-30
FAM174A	13.2038	3.09257	-2.19899	2.05198e-31	2.22768e-30
NRARP	4.43241	0.971309	-2.28023	2.23093e-31	2.4202e-30
IL17RC	5.05003	1.11694	-2.27356	2.60527e-31	2.8182e-30
WASL	13.5887	3.51166	-2.0751	2.99755e-31	3.23098e-30
HBA2	227.367	58.8547	-2.02573	9.16381e-31	9.77969e-30
RBM47	12.9198	3.37101	-2.05528	1.06769e-30	1.13704e-29
CD44	68.0286	18.2314	-2.01336	1.06881e-30	1.13743e-29
CERS6	4.56938	1.16726	-2.08497	1.17592e-30	1.24965e-29
AK1	10.6349	2.66466	-2.11522	1.33613e-30	1.41891e-29
CRIM1	8.49645	2.20592	-2.05352	1.51751e-30	1.61039e-29
PYGL	22.8443	5.92731	-2.04509	1.85033e-30	1.95261e-29
FAM127B	11.9377	2.75302	-2.21507	4.15811e-30	4.34545e-29
PLCD1	4.47645	1.03731	-2.18048	4.61917e-30	4.82393e-29
HES1	8.73875	2.03077	-2.21192	5.04599e-30	5.2624e-29
KLHL14	0.819827	6.53225	2.82596	5.42078e-30	5.64936e-29
S100A13	46.6016	11.9088	-2.08014	5.92617e-30	6.1718e-29
LLGL2	7.26938	1.77594	-2.14834	6.2302e-30	6.46613e-29
HLA-DQA2	2.78649	22.4292	2.92576	7.5845e-30	7.85013e-29
HNRNPA1P33	4.51834	0.52863	-3.24851	7.87144e-30	8.13598e-29
NRIP1	5.11407	1.34549	-2.04354	8.84748e-30	9.13232e-29
TMEM98	5.66449	1.24325	-2.24104	8.8851e-30	9.16488e-29
CTTN	21.668	5.7534	-2.01345	9.50472e-30	9.79064e-29
SPECC1	4.61474	1.16532	-2.09197	1.20953e-29	1.23999e-28
DUSP23	17.9182	4.22395	-2.16779	1.47563e-29	1.50973e-28
SGK1	72.5109	19.9657	-1.98335	1.6362e-29	1.67287e-28
S100A12	109.576	28.2478	-2.04586	1.84432e-29	1.88311e-28
ABHD5	12.6489	3.428	-2.01056	1.9482e-29	1.98782e-28
AHNAK	31.3415	8.74046	-1.96635	2.35265e-29	2.39565e-28
ECSCR	17.9259	4.4256	-2.11851	2.99244e-29	3.03485e-28
SMOX	4.2473	0.934947	-2.24603	4.02033e-29	4.06365e-28
SLC22A23	6.77456	1.80155	-2.02832	4.80338e-29	4.84542e-28
EFNB2	4.74054	1.19077	-2.08409	5.62434e-29	5.66221e-28
COX7A1	6.97647	1.31989	-2.43787	6.45417e-29	6.48466e-28
FHL2	9.56734	2.33349	-2.11754	7.79606e-29	7.80692e-28
BPGM	36.3516	10.0916	-1.98238	1.30655e-28	1.30232e-27
LEF1	57.0607	15.7784	-1.95132	1.38226e-28	1.37506e-27
FCRL2	5.48007	36.0397	2.63076	1.90307e-28	1.88943e-27
SLC20A2	12.6015	3.4475	-1.98742	1.91456e-28	1.89959e-27
HIST2H2AA3	27.6937	6.99356	-2.11131	2.76302e-28	2.73058e-27
HIST2H2AA4	27.6937	6.99356	-2.11131	2.76302e-28	2.73058e-27
GSTT1	8.59277	1.98734	-2.19684	3.96595e-28	3.89907e-27
BHLHE40	32.8563	9.20727	-1.94585	4.43461e-28	4.357e-27
CHURC1-FNTB	12.3442	3.36175	-1.98664	5.04281e-28	4.94812e-27
WLS	7.34496	1.88837	-2.04751	8.8286e-28	8.60689e-27
NDN	4.88294	1.13118	-2.16627	1.23992e-27	1.20567e-26
BCAM	5.96411	1.52321	-2.04023	1.70219e-27	1.6488e-26
RASSF6	3.84438	24.3264	2.5835	1.81701e-27	1.75664e-26
CLIP1	22.4826	6.53643	-1.91328	2.84368e-27	2.74043e-26
GATSL3	5.88964	1.41416	-2.16	3.99544e-27	3.83567e-26
ACKR3	8.15188	2.09726	-2.04691	5.17576e-27	4.94679e-26
FAM210B	10.12	2.81033	-1.96007	6.85425e-27	6.53035e-26
MGP	33.1716	9.34245	-1.93259	7.14641e-27	6.79584e-26
PAM	8.57511	2.42468	-1.93312	8.03354e-27	7.62026e-26
GPM6B	4.09063	0.96011	-2.14704	8.32316e-27	7.89002e-26
ABLIM3	5.62644	1.52152	-1.99218	8.59567e-27	8.14324e-26
PLEKHF1	5.88307	1.47907	-2.07971	9.22793e-27	8.73674e-26
RHOC	56.6075	16.3974	-1.90217	1.02096e-26	9.65405e-26
MCAM	14.2583	4.03471	-1.92168	1.1141e-26	1.05282e-25
ASS1	13.7023	3.74226	-1.97111	1.15382e-26	1.08831e-25
SLC38A2	64.2505	19.0649	-1.87793	1.23897e-26	1.16717e-25
IFITM1	154.644	45.1091	-1.87965	2.65676e-26	2.48573e-25
CLEC3B	14.6514	3.76298	-2.05605	2.79557e-26	2.61076e-25
HIST1H2BD	35.0968	9.72883	-1.97901	2.91444e-26	2.71841e-25
PLA2G4B	6.41069	1.69954	-2.00736	2.94139e-26	2.74185e-25
RIN2	9.98926	2.86351	-1.91123	3.96029e-26	3.68253e-25
CYB5R1	41.8649	12.3459	-1.88518	4.36401e-26	4.05046e-25
CTTNBP2NL	6.14164	1.74858	-1.92085	4.55187e-26	4.22222e-25
IFITM3	240.921	71.1505	-1.86526	4.63096e-26	4.29295e-25
SVIP	13.1302	3.67238	-1.97304	5.08972e-26	4.71533e-25
GSKIP	48.623	14.5364	-1.86721	6.9353e-26	6.41335e-25
SLC12A6	6.15734	1.79878	-1.89459	7.22781e-26	6.67567e-25
GLUL	152.123	46.3794	-1.83953	1.02087e-25	9.40005e-25
FHOD3	0.735307	4.98705	2.68044	1.41311e-25	1.29487e-24
KDM5B	4.87336	1.38966	-1.91519	1.72636e-25	1.57903e-24
DGKA	30.4145	9.12005	-1.85602	1.81843e-25	1.66123e-24
HSPA1A	78.1108	23.2358	-1.8396	2.06627e-25	1.88537e-24
IGFBP7	209.624	63.0875	-1.83622	2.17174e-25	1.9792e-24
MIR22HG	9.20691	2.51887	-1.96058	2.81243e-25	2.55692e-24
PROCR	5.04972	1.22326	-2.121	3.23769e-25	2.94178e-24
MMRN1	4.80357	1.39373	-1.89755	4.19103e-25	3.79656e-24
AVPI1	6.55027	1.65133	-2.07852	4.23819e-25	3.83699e-24
FLVCR2	6.93961	1.96828	-1.91472	7.51857e-25	6.7703e-24
RAB3D	6.15853	1.77484	-1.89484	8.08575e-25	7.27235e-24
TRAF3IP2	5.87713	1.75188	-1.86587	9.54451e-25	8.56906e-24
TBC1D2	8.34034	2.41749	-1.88531	1.20915e-24	1.08365e-23
PRSS23	13.553	4.06188	-1.84172	1.24829e-24	1.11805e-23
OSMR	5.06757	1.46924	-1.88158	1.43879e-24	1.28639e-23
ARAP2	8.10109	2.47827	-1.82951	1.53447e-24	1.37113e-23
PAQR7	5.03536	1.40117	-1.94475	1.97101e-24	1.756e-23
SERPINB6	36.8145	11.2615	-1.82599	2.69206e-24	2.39698e-23
STARD5	10.9583	3.08754	-1.93342	3.10957e-24	2.76383e-23
LOC100506990	4.30246	1.18712	-1.97521	3.81509e-24	3.38096e-23
FCRL3	1.41218	8.50479	2.46464	3.9885e-24	3.5305e-23
UBL3	24.4307	7.62585	-1.80173	4.21555e-24	3.7293e-23
TMEM254	20.9843	6.45926	-1.82938	5.65204e-24	4.97676e-23
SAMD9	17.2421	5.37952	-1.7984	5.734e-24	5.04599e-23
SERPINB8	7.96233	2.35937	-1.86538	5.76545e-24	5.07071e-23
VWA5A	8.45458	2.51708	-1.8543	6.88081e-24	6.04463e-23
MYO1D	4.85897	1.43971	-1.85797	7.1319e-24	6.26156e-23
TSPAN9	4.2458	1.21231	-1.88739	8.26063e-24	7.22734e-23
FAM127A	20.1116	5.96743	-1.85605	1.10801e-23	9.6717e-23
SLCO2A1	4.67992	1.36671	-1.87374	1.24086e-23	1.08064e-22
RRAGD	8.41603	2.61881	-1.80324	2.28281e-23	1.96987e-22
PINK1	16.6918	5.16568	-1.80068	2.74426e-23	2.35997e-22
CPE	13.0841	4.01036	-1.80281	4.80166e-23	4.10589e-22
TOM1L2	6.71122	2.08602	-1.80102	4.99821e-23	4.26912e-22
ESAM	8.84112	2.56051	-1.87112	5.59325e-23	4.76927e-22
SOCS6	4.64963	1.42133	-1.81874	8.46651e-23	7.17468e-22
TPSB2	4.82236	1.1648	-2.10019	9.0424e-23	7.6584e-22
PON2	12.2139	3.64986	-1.84241	1.00739e-22	8.51772e-22
EFNB1	5.39859	1.60361	-1.84218	1.04278e-22	8.81196e-22
LAPTM4A	160.008	52.5257	-1.73175	1.25598e-22	1.06017e-21
SPARCL1	50.0124	16.2189	-1.73626	1.43762e-22	1.2108e-21
NAPRT	18.8841	5.85623	-1.79188	1.69914e-22	1.42787e-21
QSOX1	21.0803	6.84161	-1.75101	2.13461e-22	1.78685e-21
LIMA1	24.5741	7.97203	-1.73508	2.77807e-22	2.31521e-21
HSPA6	6.77827	2.02777	-1.85066	2.79759e-22	2.33019e-21
LGALS3	182.589	60.2443	-1.71921	3.39053e-22	2.8194e-21
FMOD	9.30431	2.89329	-1.78327	3.43903e-22	2.85816e-21
CMTM8	5.35409	1.46651	-2.01369	3.76369e-22	3.12111e-21
MSMO1	68.739	22.7645	-1.72082	4.09117e-22	3.38896e-21
KIF13A	4.97471	1.51825	-1.8066	5.10355e-22	4.21832e-21
PIGY	88.131	29.2941	-1.71699	5.32626e-22	4.39758e-21
RHOBTB2	6.74678	33.0927	2.21833	7.95739e-22	6.54491e-21
MGST3	34.0338	11.2374	-1.7223	1.37137e-21	1.12366e-20
CLDN12	5.86432	1.83596	-1.78434	1.57215e-21	1.28677e-20
HTRA1	24.1884	7.94233	-1.71989	1.63732e-21	1.33866e-20
RDH10	8.91937	2.85646	-1.73806	1.90065e-21	1.55312e-20
ARRDC4	7.15733	2.29968	-1.74792	2.36415e-21	1.92666e-20
MOSPD1	14.0587	4.56507	-1.73848	2.45582e-21	1.99921e-20
SQRDL	39.7352	13.2303	-1.70165	2.47568e-21	2.01429e-20
SERPINE2	5.52038	1.63306	-1.82034	3.02273e-21	2.45278e-20
RAMP3	11.2884	3.47785	-1.80134	3.09042e-21	2.50636e-20
SVIL-AS1	6.30785	1.89119	-1.82803	4.28353e-21	3.47026e-20
CST3	110.603	37.5565	-1.68058	5.20313e-21	4.20849e-20
FAM213A	40.068	13.6084	-1.69007	5.66807e-21	4.5772e-20
FLNB	20.2082	6.90155	-1.66743	6.03721e-21	4.86229e-20
RNF149	32.8313	11.1047	-1.67725	6.91889e-21	5.5546e-20
NPDC1	6.15926	1.82607	-1.84145	7.48385e-21	6.00497e-20
ACSS2	9.15245	3.01348	-1.71215	8.53021e-21	6.81199e-20
IL23A	4.20106	1.0476	-2.0914	9.15864e-21	7.30611e-20
APP	46.1276	15.8949	-1.65704	1.26161e-20	1.00113e-19
CASP4	81.1201	27.8991	-1.66292	1.40247e-20	1.11057e-19
TM7SF2	20.4871	6.79169	-1.70597	1.5873e-20	1.25431e-19
TBC1D4	5.62433	1.88874	-1.69383	1.73234e-20	1.36606e-19
ARL4C	18.4012	6.32901	-1.66247	1.77349e-20	1.39705e-19
SEC11C	213.778	73.6041	-1.64991	1.8408e-20	1.44856e-19
CIB2	4.83206	1.38401	-1.89986	2.07135e-20	1.6266e-19
NID1	9.07612	3.09208	-1.66626	2.21808e-20	1.74091e-19
ATP6V1D	78.5347	27.2966	-1.6469	2.6694e-20	2.0908e-19
HBP1	34.1904	11.8401	-1.65324	2.85691e-20	2.23651e-19
F2R	9.30108	3.12234	-1.6833	3.28337e-20	2.56371e-19
TMEM59	67.7421	23.8226	-1.63304	3.83435e-20	2.9862e-19
TNFRSF1A	30.5169	10.51	-1.65052	5.17346e-20	4.01874e-19
JMJD7	9.00795	2.8198	-1.76877	7.84315e-20	6.06448e-19
ANO10	6.5304	2.09984	-1.73046	8.28527e-20	6.39651e-19
GUK1	248.395	88.1189	-1.61913	8.90149e-20	6.86875e-19
SCOC	53.3751	18.8986	-1.62011	1.4989e-19	1.14839e-18
ACOX1	10.7596	3.79939	-1.62021	2.00625e-19	1.53322e-18
TMEM187	4.93619	1.55629	-1.78982	2.58757e-19	1.96851e-18
BNIP3	59.8704	21.3485	-1.60831	2.71723e-19	2.0661e-18
FAM167B	5.95394	1.73344	-1.89185	3.23182e-19	2.45492e-18
YPEL5	57.0367	20.4191	-1.60056	3.40193e-19	2.58153e-18
CD151	28.2578	9.89117	-1.62493	4.23565e-19	3.19973e-18
MGLL	19.347	6.93427	-1.6047	4.51178e-19	3.40662e-18
TXN	806.63	294.74	-1.58371	4.67966e-19	3.52985e-18
GGTA1P	9.72763	3.21983	-1.69733	6.30945e-19	4.7238e-18
CFI	4.31174	1.34637	-1.74888	9.40292e-19	7.0051e-18
LAPTM4B	14.7071	5.1374	-1.62605	9.62167e-19	7.15748e-18
ATP6V0E1	302.225	110.685	-1.56848	1.30156e-18	9.63471e-18
RAB13	57.5808	20.8531	-1.58455	1.62819e-18	1.2029e-17
FURIN	11.898	4.27637	-1.59456	1.6541e-18	1.22144e-17
PTK7	4.71755	1.60874	-1.64054	3.52422e-18	2.58095e-17
DIRC2	4.54627	1.52928	-1.66844	3.5756e-18	2.61604e-17
DUSP1	47.9285	17.5282	-1.56285	4.75619e-18	3.47476e-17
ZMYND11	11.5418	4.18374	-1.5707	4.85568e-18	3.5423e-17
SC5D	12.7328	4.70886	-1.55828	5.27973e-18	3.84793e-17
ZNF385B	6.8183	28.0691	1.94909	6.79961e-18	4.93896e-17
HIGD1A	130.931	49.322	-1.53217	8.51552e-18	6.16162e-17
SECTM1	9.48616	3.32772	-1.60828	9.0186e-18	6.51938e-17
RBMS2	5.35342	1.96654	-1.56162	1.01507e-17	7.32371e-17
B3GALT4	4.41921	1.38113	-1.75188	1.09176e-17	7.86578e-17
NQO1	7.88858	2.77195	-1.6115	1.1382e-17	8.19642e-17
BEND4	1.8775	7.59689	1.93042	1.3961e-17	1.00297e-16
LRRC1	6.86915	2.4302	-1.60152	1.60939e-17	1.15456e-16
MX1	20.0004	7.53979	-1.52437	3.26316e-17	2.32438e-16
GNG7	6.04249	23.6314	1.899	4.30939e-17	3.05785e-16
ZFYVE21	27.4727	10.2602	-1.5361	4.79628e-17	3.38948e-16
TNFAIP1	15.549	5.90316	-1.51547	6.54905e-17	4.58919e-16
RAMP2	10.1542	3.34809	-1.67794	7.81073e-17	5.46317e-16
CAST	91.8695	35.9237	-1.48088	1.1976e-16	8.33791e-16
SPRY1	4.6154	1.58554	-1.60863	1.19932e-16	8.34603e-16
B3GALTL	2.77901	11.1359	1.92135	1.27383e-16	8.86046e-16
NUCB2	58.0392	22.3195	-1.49115	1.30775e-16	9.09221e-16
HAAO	1.02273	5.08766	2.18843	1.63538e-16	1.1344e-15
FCRL1	6.13911	23.4319	1.85131	1.74338e-16	1.20765e-15
PHLDB3	5.13844	1.81609	-1.59526	1.93873e-16	1.34051e-15
SPR	5.51452	1.8698	-1.63992	2.33564e-16	1.61052e-15
TGIF1	15.1116	5.69165	-1.52496	2.39534e-16	1.65094e-15
S100A4	182.706	70.1981	-1.48009	2.4079e-16	1.65884e-15
CD34	10.1448	3.79503	-1.51577	2.44271e-16	1.68128e-15
FBXO3	18.7029	7.14268	-1.50077	2.47267e-16	1.70113e-15
TMSB4X	4605.96	1808.92	-1.45824	2.88643e-16	1.97857e-15
BEX4	14.4351	5.34032	-1.53597	4.29518e-16	2.93358e-15
C4orf3	128.899	51.0186	-1.45266	4.60543e-16	3.14264e-15
C12orf75	87.3867	34.8852	-1.44854	8.34101e-16	5.65593e-15
MFHAS1	2.33059	8.90972	1.85189	9.13692e-16	6.19007e-15
CTBP2	7.84396	2.98049	-1.48928	1.20654e-15	8.11133e-15
TLDC1	5.89938	2.29412	-1.47954	1.20685e-15	8.11133e-15
SERINC5	16.6397	6.53762	-1.44148	1.42388e-15	9.55222e-15
SSR4	288.684	116.737	-1.42936	1.66635e-15	1.11491e-14
PDLIM5	15.6517	6.26165	-1.44295	1.73173e-15	1.15763e-14
CORO1B	33.4613	13.2945	-1.44242	1.75964e-15	1.17577e-14
SLC30A4	1.11003	4.43616	1.99088	2.49718e-15	1.6627e-14
SFMBT2	1.20414	4.51368	1.81206	2.97814e-15	1.97683e-14
C7orf60	9.34989	3.7094	-1.44905	3.15963e-15	2.09546e-14
IFI6	48.1909	18.9931	-1.44142	3.92634e-15	2.60051e-14
GNG11	33.2799	12.942	-1.45398	4.09657e-15	2.71207e-14
DTX3	2.08003	8.23692	1.87553	5.14059e-15	3.38987e-14
GGT1	4.52428	1.73615	-1.50994	5.33979e-15	3.51662e-14
LYSMD4	4.77927	1.80541	-1.50789	6.21434e-15	4.08012e-14
CD84	2.95925	10.6059	1.74644	6.30364e-15	4.13695e-14
ECI2	41.155	16.5993	-1.41454	6.91494e-15	4.53026e-14
WNK2	1.82222	6.52459	1.73475	7.06852e-15	4.62887e-14
SERTAD1	19.8153	7.78389	-1.4513	7.74383e-15	5.0689e-14
SLC25A24	10.1961	4.08996	-1.42723	9.66488e-15	6.30996e-14
FGD6	2.37405	8.46583	1.74123	1.06574e-14	6.94597e-14
AIG1	31.3202	12.8462	-1.40712	1.28358e-14	8.35128e-14
NFE2L2	77.9935	32.4411	-1.38388	1.44119e-14	9.36059e-14
TIAF1	5.02572	1.91364	-1.49536	1.70092e-14	1.10191e-13
SNX24	6.18579	2.35104	-1.4872	1.84019e-14	1.19061e-13
LGALS3BP	30.0718	12.2801	-1.38944	1.89183e-14	1.22349e-13
PLEK	15.6818	54.7498	1.70745	1.89773e-14	1.22678e-13
DUSP6	8.40002	3.37333	-1.41961	2.28652e-14	1.47496e-13
MOSPD3	10.3208	4.00191	-1.46121	2.29676e-14	1.48093e-13
INPP5A	7.19727	2.86008	-1.42914	2.32687e-14	1.4997e-13
HEG1	5.55351	2.27783	-1.39078	2.38311e-14	1.5353e-13
MORC4	5.19908	2.09137	-1.42473	2.43202e-14	1.56547e-13
SLC19A2	5.06997	2.00242	-1.44705	2.43469e-14	1.56652e-13
CNIH4	53.3652	22.1201	-1.38758	2.50269e-14	1.60891e-13
C10orf54	8.46178	3.45737	-1.39926	2.55983e-14	1.64423e-13
GNLY	11.2805	4.30366	-1.48609	3.26331e-14	2.08193e-13
ERRFI1	6.74608	2.68186	-1.42872	3.46032e-14	2.20483e-13
LINC00665	3.26658	12.3623	1.84147	4.41141e-14	2.80255e-13
CROT	9.71623	3.94136	-1.40849	5.69745e-14	3.60139e-13
CYBB	11.5756	39.3555	1.66794	6.49659e-14	4.09625e-13
TMEM51	6.11159	2.3603	-1.4485	7.9186e-14	4.97416e-13
IFT43	18.7112	7.4812	-1.42068	9.25879e-14	5.78712e-13
ANKRD37	19.2296	7.78968	-1.43127	1.14273e-13	7.116e-13
NR2F2	4.61182	1.86347	-1.40358	1.21864e-13	7.57621e-13
PCBP4	4.20994	1.6474	-1.48782	1.25335e-13	7.78563e-13
MYL12B	631.43	270.964	-1.33132	1.25828e-13	7.81304e-13
FHL1	5.97898	2.36388	-1.42191	1.27845e-13	7.935e-13
GALNT18	4.28926	1.71612	-1.42744	1.39236e-13	8.63139e-13
SLC9A3R1	68.9058	29.5467	-1.33398	1.56057e-13	9.66617e-13
VAMP3	36.9803	15.9313	-1.33419	2.11836e-13	1.30729e-12
MXI1	16.041	6.88659	-1.34075	2.40819e-13	1.48312e-12
RBP7	8.81434	3.13857	-1.53709	2.52853e-13	1.55596e-12
EMC3	58.3193	25.165	-1.33264	2.60778e-13	1.60277e-12
POLB	41.0788	17.6227	-1.33326	3.41213e-13	2.08863e-12
ORMDL2	46.903	20.3284	-1.32701	3.46266e-13	2.11613e-12
ACVR1	4.7441	1.90077	-1.40087	3.47026e-13	2.11906e-12
THRIL	7.82176	25.8508	1.63254	3.86455e-13	2.35506e-12
CASP1	36.6375	15.7247	-1.32808	4.04209e-13	2.4583e-12
MIR4435-1HG	22.0616	8.804	-1.40673	5.98179e-13	3.61613e-12
SNHG4	1.79994	6.7921	1.78948	6.67428e-13	4.02348e-12
THEM4	1.43612	4.78951	1.65654	6.83814e-13	4.11898e-12
PDP1	11.2264	4.88405	-1.31506	7.14896e-13	4.30277e-12
HTATIP2	44.0819	19.4493	-1.31032	7.50942e-13	4.51612e-12
STS	1.7265	5.57106	1.61254	9.36754e-13	5.61569e-12
RELL1	11.6444	5.00618	-1.31039	1.05126e-12	6.28963e-12
QTRTD1	6.00046	19.055	1.57382	1.20468e-12	7.19617e-12
ANKRD12	11.6631	5.16257	-1.28676	1.23487e-12	7.37067e-12
TMED3	79.7777	35.5857	-1.28858	1.24341e-12	7.41872e-12
CREB3L2	7.00909	3.11785	-1.30203	1.2515e-12	7.46399e-12
HIST2H2BF	1.48128	6.73309	1.90493	1.50406e-12	8.94911e-12
PPP1R16B	8.60797	27.1729	1.55754	1.53885e-12	9.14888e-12
CCL20	11.9649	4.90622	-1.42377	1.54046e-12	9.15484e-12
TMEM43	25.0113	11.1673	-1.28644	1.56877e-12	9.31944e-12
DYNLT1	136.102	60.7273	-1.27937	1.90143e-12	1.12734e-11
TINAGL1	4.35601	1.76087	-1.38336	1.93051e-12	1.1436e-11
RGS5	6.36913	2.76798	-1.30811	1.93111e-12	1.1436e-11
ALKBH3	10.0313	4.25035	-1.33204	2.43282e-12	1.43508e-11
C14orf1	31.1385	13.8504	-1.28408	2.62477e-12	1.54589e-11
RAB34	9.97716	4.15475	-1.34386	3.1992e-12	1.87762e-11
LRRC8A	11.759	5.25281	-1.2791	3.24701e-12	1.90494e-11
PPP4R1	36.6139	16.5882	-1.26283	3.37899e-12	1.97929e-11
WDR91	7.36951	3.26092	-1.28646	3.45375e-12	2.0223e-11
C11orf74	5.46827	1.97981	-1.49428	3.71776e-12	2.17604e-11
MARCKS	35.4526	15.9639	-1.25862	3.79267e-12	2.21817e-11
LGALS8	7.49757	3.35546	-1.27223	4.09538e-12	2.39151e-11
BRCA2	1.47304	4.52836	1.5308	4.39887e-12	2.56476e-11
VIMP	54.248	24.4463	-1.26303	4.76308e-12	2.77283e-11
HYAL2	17.4448	7.77469	-1.27872	5.03587e-12	2.92728e-11
MCM8	5.7192	17.3173	1.51345	6.14742e-12	3.56225e-11
TOM1	18.6356	8.33864	-1.26548	6.40911e-12	3.70962e-11
ITPRIPL1	3.17036	10.1875	1.55286	7.70441e-12	4.44402e-11
CRACR2A	1.3227	4.40877	1.58231	7.70825e-12	4.44453e-11
ZBTB7B	13.8254	6.31575	-1.25573	8.23674e-12	4.7384e-11
CFH	13.7474	6.22435	-1.24698	1.03794e-11	5.94834e-11
SKAP2	7.23057	22.011	1.50015	1.0937e-11	6.26081e-11
DNMBP	4.12821	12.5238	1.5006	1.11279e-11	6.36763e-11
ZNF318	3.64801	11.0004	1.49365	1.14999e-11	6.57306e-11
PFAS	7.70609	22.9529	1.48513	1.19793e-11	6.8419e-11
IFI44	10.2315	4.43103	-1.29723	1.21795e-11	6.95097e-11
TECR	132.357	61.4011	-1.2286	1.26569e-11	7.21255e-11
EPAS1	14.8632	6.80518	-1.23569	1.27257e-11	7.24898e-11
CASC5	2.79813	8.31446	1.48865	1.28923e-11	7.33837e-11
PAX5	10.0804	29.7915	1.47686	1.39959e-11	7.95156e-11
OBFC1	7.107	3.25011	-1.24514	1.41515e-11	8.0309e-11
CD3EAP	2.30896	7.16642	1.52994	1.43317e-11	8.13006e-11
PCMTD1	18.5998	8.58293	-1.23242	1.57245e-11	8.8968e-11
CCDC88A	8.8063	25.7459	1.47341	1.61145e-11	9.11405e-11
NLRX1	7.28806	3.29312	-1.25825	1.8848e-11	1.06282e-10
C7orf73	77.9394	36.4717	-1.21452	2.12126e-11	1.19438e-10
BSCL2	12.3389	5.58244	-1.25427	2.35894e-11	1.32425e-10
PRCP	72.4628	34.0195	-1.21041	2.66698e-11	1.49329e-10
INPP5D	10.6464	31.1528	1.45066	3.1269e-11	1.74628e-10
SLAMF6	14.6315	42.1801	1.44623	3.68485e-11	2.04878e-10
WHAMMP1	1.30221	4.34286	1.61623	3.95679e-11	2.19756e-10
ZC3H12A	8.07488	3.68122	-1.23712	5.40778e-11	2.98585e-10
NCK2	20.5878	9.6401	-1.21376	5.49668e-11	3.03382e-10
FAM214B	4.26551	1.86566	-1.27421	5.53974e-11	3.05647e-10
YOD1	8.43148	3.97562	-1.20397	6.64934e-11	3.65665e-10
TXNDC17	62.5791	29.8398	-1.18791	6.98307e-11	3.83599e-10
JUNB	50.4642	23.5827	-1.19212	7.1396e-11	3.92055e-10
TSTD1	66.1961	30.6126	-1.21033	7.86305e-11	4.30998e-10
SUMF1	11.8701	5.51669	-1.21555	8.13134e-11	4.45219e-10
YIPF1	18.6861	8.75102	-1.20685	8.5248e-11	4.66563e-10
BTD	6.06298	2.60803	-1.29497	8.52734e-11	4.66563e-10
BANK1	7.69094	21.5954	1.41978	8.98625e-11	4.90605e-10
RTKN2	7.18496	3.34441	-1.20322	1.03162e-10	5.62605e-10
HRK	2.43565	7.36981	1.45129	1.10417e-10	6.01735e-10
IFI27L2	74.662	35.0277	-1.1951	1.16991e-10	6.36874e-10
TP53	31.4827	88.1622	1.40156	1.22195e-10	6.64959e-10
LINC01503	4.17601	1.40225	-1.49321	1.33492e-10	7.25653e-10
ZNF860	1.60999	4.8227	1.50798	1.48587e-10	8.04521e-10
KANK2	10.0774	27.8528	1.39408	1.56952e-10	8.48595e-10
DUSP22	30.492	14.6578	-1.17164	1.58601e-10	8.56901e-10
CEBPD	13.7567	6.27732	-1.225	1.61062e-10	8.69264e-10
DTX2	14.1699	6.7052	-1.18832	1.6336e-10	8.8135e-10
METAP2	61.9323	173.559	1.3889	1.6708e-10	9.00779e-10
FAM177A1	15.9093	7.58863	-1.17707	1.88794e-10	1.01639e-09
KLHDC8B	12.626	5.91852	-1.19108	2.11405e-10	1.13569e-09
PLVAP	18.9145	8.98456	-1.17014	2.21745e-10	1.18997e-09
DLEU2L	2.92335	8.57142	1.43246	2.25126e-10	1.20726e-09
ADCY3	6.11814	17.0854	1.38543	2.51248e-10	1.3459e-09
FAM72C	9.61618	26.398	1.37566	2.74051e-10	1.46701e-09
WDR4	13.2242	36.4332	1.37386	2.9665e-10	1.58462e-09
XRCC2	1.88719	5.45867	1.42548	3.16137e-10	1.68692e-09
CHIC2	20.7627	9.82542	-1.18364	3.18682e-10	1.6999e-09
MNS1	2.43315	6.89861	1.42687	4.00923e-10	2.12732e-09
MFSD5	26.869	13.0681	-1.15369	4.03705e-10	2.14057e-09
NT5M	1.72413	5.25527	1.46955	4.50474e-10	2.38521e-09
TMEM9B	47.7059	23.5325	-1.14048	4.6755e-10	2.47302e-09
UBAC2	36.0293	17.7757	-1.13893	4.77409e-10	2.52428e-09
SLX4	2.05712	5.65995	1.36299	5.05913e-10	2.67125e-09
ABTB1	12.6019	6.05264	-1.16545	5.39701e-10	2.84667e-09
ZBTB12	3.01042	8.61829	1.39202	5.51807e-10	2.90951e-09
RETSAT	13.8084	6.81189	-1.14325	6.09334e-10	3.20947e-09
AGTRAP	20.6665	9.90279	-1.16214	6.27996e-10	3.30431e-09
IPPK	7.30032	3.55275	-1.14936	7.4684e-10	3.9092e-09
WDR19	3.17491	8.60821	1.34905	7.5186e-10	3.93411e-09
GSG2	3.37754	9.26227	1.35768	7.52314e-10	3.93512e-09
BLVRB	61.807	30.5962	-1.13085	8.44378e-10	4.40752e-09
STYXL1	23.4643	11.5672	-1.13985	9.00517e-10	4.69083e-09
KHSRP	38.5328	102.626	1.3243	9.3478e-10	4.8626e-09
FAM72B	13.0412	34.4655	1.32385	1.00633e-09	5.22937e-09
MSI2	8.90139	23.9703	1.33613	1.01427e-09	5.26884e-09
SLC11A2	15.7203	7.83839	-1.12263	1.02972e-09	5.3454e-09
NINJ2	4.19569	1.81914	-1.30461	1.11346e-09	5.77215e-09
PWWP2B	6.19257	2.94136	-1.18188	1.12362e-09	5.82285e-09
KBTBD8	11.1055	29.0524	1.31706	1.17535e-09	6.08469e-09
PYHIN1	7.34872	19.9834	1.32414	1.26508e-09	6.53798e-09
AGO2	2.12684	5.92878	1.37196	1.34628e-09	6.94812e-09
CLSPN	4.1079	10.8206	1.31089	1.38588e-09	7.14759e-09
UBE2F	25.7806	12.84	-1.11783	1.38704e-09	7.15116e-09
TMEM185A	8.6704	4.24697	-1.13914	1.62803e-09	8.35934e-09
SYNE2	38.2473	100.063	1.30277	1.63948e-09	8.4153e-09
CALM1	154.681	78.6951	-1.09532	1.6785e-09	8.61266e-09
PSEN1	15.7652	7.9796	-1.1017	1.79832e-09	9.20556e-09
C8orf4	4.11235	1.88808	-1.20255	2.05754e-09	1.04934e-08
MANBAL	29.3348	14.6494	-1.11402	2.06992e-09	1.0553e-08
CETN2	62.2483	31.4462	-1.09686	2.49297e-09	1.26415e-08
NSDHL	29.8632	15.0558	-1.10149	2.60285e-09	1.31854e-08
CCDC122	1.46579	4.23722	1.44708	2.83484e-09	1.43174e-08
HLTF	14.6706	37.3058	1.28112	2.88555e-09	1.45637e-08
TP53TG1	24.3876	12.0007	-1.135	3.01062e-09	1.51747e-08
DAD1	253.714	129.882	-1.08237	3.054e-09	1.53882e-08
PFKM	19.6186	50.4668	1.27873	3.12837e-09	1.57472e-08
GBP2	16.1606	8.18634	-1.09073	3.12994e-09	1.57498e-08
LRRC16A	1.97083	5.24696	1.32788	3.33525e-09	1.67327e-08
ZNF419	4.9681	2.41937	-1.15249	3.34055e-09	1.67538e-08
ACAA1	36.0874	18.4176	-1.08114	4.47035e-09	2.23163e-08
TTC28-AS1	15.9574	7.81863	-1.12881	4.50973e-09	2.2498e-08
RCAN1	12.3189	6.1691	-1.10106	4.52607e-09	2.25721e-08
CIITA	5.60601	14.3038	1.25942	5.39714e-09	2.67659e-08
AKTIP	17.6381	8.96901	-1.08565	5.41182e-09	2.68211e-08
EMC7	61.3301	31.5482	-1.07354	5.74154e-09	2.84086e-08
BRCA1	11.3003	28.6772	1.2536	6.05043e-09	2.99075e-08
BCYRN1	4.07821	0.977423	-2.03422	6.09991e-09	3.01423e-08
POLH	5.75005	14.499	1.24801	7.01029e-09	3.45391e-08
AHCYL2	4.08501	2.06862	-1.09828	7.34403e-09	3.60892e-08
S100P	17.367	8.06561	-1.18313	7.4391e-09	3.65445e-08
ZDHHC9	4.20233	2.11155	-1.09767	7.53619e-09	3.69854e-08
FBXO25	12.7429	6.53816	-1.0778	8.12203e-09	3.98088e-08
FAM72A	14.9054	36.9886	1.23746	8.79995e-09	4.30058e-08
DHRS7B	8.81673	4.41243	-1.10292	8.87156e-09	4.33418e-08
PGRMC1	38.9464	20.2969	-1.0574	9.32243e-09	4.54856e-08
ZNF100	1.98111	5.25255	1.28051	1.04538e-08	5.08753e-08
OSTF1	98.3029	51.5249	-1.04863	1.0454e-08	5.08753e-08
CD46	63.0717	33.3032	-1.04535	1.08529e-08	5.27825e-08
TSPAN14	20.2547	10.6968	-1.04481	1.22368e-08	5.9379e-08
JARID2	6.31339	3.2941	-1.0612	1.24985e-08	6.05322e-08
KIF18B	6.99928	17.3792	1.22342	1.30077e-08	6.29579e-08
MYL6	1545.21	817.944	-1.03569	1.31639e-08	6.36935e-08
PGAP3	5.96122	3.01732	-1.0882	1.56194e-08	7.51415e-08
DHFR	41.6869	102.302	1.21228	1.61717e-08	7.76991e-08
ZDHHC23	1.8108	4.70394	1.25527	1.639e-08	7.86979e-08
DDX58	4.57599	2.35173	-1.06689	1.74821e-08	8.37022e-08
RAB5B	30.754	16.421	-1.03145	1.77187e-08	8.47815e-08
ZNF486	2.29425	5.80765	1.25613	1.81562e-08	8.68196e-08
SAMHD1	11.1869	27.9834	1.22036	1.84818e-08	8.83488e-08
GBP3	8.4994	4.37819	-1.05927	1.85821e-08	8.88e-08
ATP6V1G1	144.684	76.4386	-1.02859	1.86852e-08	8.92644e-08
IGFBP3	23.7499	12.261	-1.03957	1.87526e-08	8.95584e-08
ZNF768	6.00028	14.8806	1.21927	1.91606e-08	9.1449e-08
TTC39C	8.68186	4.43264	-1.06033	1.94647e-08	9.28122e-08
ADIPOR1	68.1448	36.2698	-1.02775	2.08124e-08	9.90822e-08
CALCOCO1	11.2482	5.89625	-1.04388	2.11203e-08	1.00453e-07
IRF7	7.79858	3.93512	-1.07365	2.18046e-08	1.03577e-07
CARD11	17.0561	41.9299	1.19987	2.19601e-08	1.0425e-07
ATG14	5.06665	2.63518	-1.05373	2.28386e-08	1.08319e-07
POU2F2	10.9212	26.4528	1.19646	2.3805e-08	1.12689e-07
ASB13	8.16066	20.0521	1.20522	2.81736e-08	1.32828e-07
BACH2	20.2051	47.8407	1.18422	3.14804e-08	1.48095e-07
MYBBP1A	10.8462	26.3851	1.18516	3.25232e-08	1.52811e-07
RDM1	2.07239	5.88833	1.40353	3.42927e-08	1.60924e-07
RASGRP3	10.856	25.7741	1.1816	3.64203e-08	1.70643e-07
IFT20	28.6523	15.019	-1.03526	3.83422e-08	1.79481e-07
TLR10	9.76079	23.3414	1.17734	4.00133e-08	1.87014e-07
CHCHD10	20.7933	51.259	1.20316	4.00911e-08	1.87319e-07
GCSAM	31.1987	73.4468	1.1743	4.01446e-08	1.87511e-07
MCM4	47.8891	115.086	1.17058	4.44257e-08	2.06677e-07
TXNIP	138.275	75.4355	-1.00022	4.44986e-08	2.06952e-07
EPB41L2	5.54364	13.7737	1.1897	4.50804e-08	2.09464e-07
POLQ	3.44615	8.28368	1.17247	4.67218e-08	2.16757e-07
C11orf84	12.597	30.039	1.16928	4.92713e-08	2.28375e-07
KIF20B	6.28391	15.0671	1.1706	4.97393e-08	2.30332e-07
STIM1	16.3643	8.8141	-1.00656	5.07159e-08	2.34711e-07
NCOA1	6.25225	3.35083	-1.01285	5.1812e-08	2.3971e-07
NABP1	13.2939	7.08745	-1.01166	5.20836e-08	2.40893e-07
HMMR	23.5929	55.878	1.1659	5.2266e-08	2.41662e-07
SLC43A2	1.71183	4.1565	1.19015	5.5432e-08	2.55753e-07
VCL	9.27808	4.9706	-1.00669	5.55333e-08	2.56142e-07
P4HB	222.851	121.914	-0.992794	5.56241e-08	2.56482e-07
EMB	14.2502	34.0301	1.16416	5.56833e-08	2.56677e-07
C1orf54	25.9105	13.3338	-1.05451	5.85461e-08	2.6938e-07
UXS1	20.6428	11.0944	-1.00834	6.14543e-08	2.82245e-07
ABL1	4.76751	11.5175	1.16932	6.43176e-08	2.95306e-07
STIL	5.54782	13.0984	1.15953	6.6157e-08	3.03566e-07
SEC61G	343.865	186.134	-0.99026	6.83003e-08	3.12926e-07
APOBEC3C	16.2065	38.6986	1.16426	7.28161e-08	3.3311e-07
MSH5	2.67553	6.54935	1.17926	7.34621e-08	3.35964e-07
MFGE8	14.3163	7.63047	-1.00437	8.27746e-08	3.77181e-07
PPP2R5A	39.9797	21.8499	-0.986098	8.51234e-08	3.8765e-07
USP13	3.39517	8.02142	1.1478	8.53809e-08	3.88706e-07
IPO11	3.98644	9.5446	1.16263	9.19867e-08	4.18023e-07
LY75	2.04827	4.9111	1.16059	9.44055e-08	4.28628e-07
DENND3	1.66119	4.05327	1.18904	9.60219e-08	4.35705e-07
TONSL	4.34373	10.2708	1.1407	9.66588e-08	4.38463e-07
CENPF	12.2272	28.465	1.13811	9.72967e-08	4.41092e-07
MTRNR2L8	338.932	187.979	-0.97429	1.0213e-07	4.62034e-07
FCGR3B	18.9703	9.96746	-1.00101	1.02685e-07	4.64406e-07
IFI27L1	20.0132	10.5411	-1.03616	1.02964e-07	4.65526e-07
MAST2	6.72026	15.7397	1.13842	1.05232e-07	4.75497e-07
CCDC69	58.325	135.404	1.13309	1.09388e-07	4.93539e-07
KIF14	3.77981	8.79416	1.13551	1.15592e-07	5.20907e-07
LPIN1	9.34575	5.09862	-0.984473	1.21482e-07	5.46957e-07
UGGT1	5.28321	12.4357	1.12759	1.40292e-07	6.29619e-07
SYK	32.2527	74.3404	1.12302	1.403e-07	6.29619e-07
FANCB	2.01526	4.88525	1.16741	1.44604e-07	6.48742e-07
ANKRD26	2.5398	5.93129	1.13337	1.45092e-07	6.50353e-07
NEU3	1.87899	4.57313	1.16498	1.48436e-07	6.65144e-07
DHX33	6.05616	14.0864	1.12378	1.54121e-07	6.89596e-07
COX16	56.3203	31.0185	-0.967348	1.58979e-07	7.10489e-07
TTF2	9.24106	21.3745	1.11889	1.6381e-07	7.31431e-07
URB2	3.72293	8.70022	1.1244	1.64174e-07	7.32838e-07
BLOC1S6	25.0695	57.9697	1.11865	1.67569e-07	7.46891e-07
HHEX	5.31027	12.9109	1.17023	1.6762e-07	7.46895e-07
KIAA1191	33.0467	18.431	-0.965036	1.74116e-07	7.75383e-07
GNG10	71.6706	39.5463	-0.961833	1.92688e-07	8.5456e-07
DNA2	6.66536	15.0862	1.1103	1.97039e-07	8.73344e-07
FBXO41	6.22202	14.2984	1.10632	2.09719e-07	9.27641e-07
MTRNR2L1	40.8655	22.8115	-0.96316	2.10161e-07	9.29323e-07
UHRF1	25.8413	58.4911	1.10402	2.16236e-07	9.55629e-07
SCIMP	3.5328	8.39673	1.1361	2.2583e-07	9.97151e-07
NME3	16.8191	9.12448	-0.997732	2.29523e-07	1.01286e-06
C20orf24	125.062	69.9997	-0.951705	2.34077e-07	1.03206e-06
CDKN2A	6.12402	14.3867	1.14041	2.47546e-07	1.087e-06
PSEN2	4.79224	2.53224	-1.01417	2.54776e-07	1.11745e-06
TMEM120A	11.3936	6.15705	-0.987868	2.55045e-07	1.1183e-06
DPM3	40.1093	21.7626	-0.991147	2.66496e-07	1.16783e-06
KIAA1524	8.36669	18.9809	1.09805	2.69547e-07	1.18086e-06
EXT1	6.13083	3.34106	-0.975114	2.71183e-07	1.18768e-06
C8orf59	158.803	88.7036	-0.946665	2.72358e-07	1.19214e-06
DECR1	94.5526	52.9772	-0.9472	2.74907e-07	1.20295e-06
POLD1	17.3745	39.2176	1.09231	2.8527e-07	1.24613e-06
TRANK1	7.79655	17.5758	1.09146	2.90648e-07	1.26852e-06
MME	21.6286	48.552	1.09067	3.02607e-07	1.31767e-06
SEL1L3	45.7738	103.109	1.08906	3.04216e-07	1.32391e-06
CPPED1	6.4848	3.6073	-0.954815	3.17184e-07	1.37796e-06
MOB3C	5.1391	2.7767	-0.981092	3.19507e-07	1.38725e-06
TMEM147	76.3874	42.9453	-0.94643	3.23394e-07	1.40292e-06
NPC2	180.351	102.334	-0.938896	3.28452e-07	1.42405e-06
AMPD3	7.25307	4.02203	-0.957644	3.35714e-07	1.4547e-06
ZNHIT1	39.25	21.984	-0.949631	3.36621e-07	1.45821e-06
GTSE1	9.83128	22.1281	1.08697	3.44477e-07	1.49053e-06
TBC1D24	2.18042	4.96031	1.09334	3.49433e-07	1.51154e-06
TOPORS-AS1	20.7906	11.2096	-0.99824	3.52813e-07	1.52573e-06
TRAF5	8.98664	20.2267	1.0849	3.58867e-07	1.55102e-06
INSIG2	15.6147	8.67352	-0.951726	3.6086e-07	1.55918e-06
DENND4B	7.75569	17.523	1.0844	3.71305e-07	1.60202e-06
B3GNT2	20.3533	11.3805	-0.944981	3.73396e-07	1.61058e-06
COA7	5.95369	13.8373	1.11775	3.74151e-07	1.61338e-06
CENPI	1.8556	4.40395	1.13641	3.75883e-07	1.62039e-06
RAB9A	28.9687	16.1748	-0.949265	3.80984e-07	1.6405e-06
TAF1A	5.42232	12.4668	1.11025	3.86488e-07	1.66231e-06
NEAT1	128.619	71.909	-0.93027	3.93806e-07	1.69282e-06
CEP135	3.03906	6.93001	1.09569	4.09721e-07	1.75973e-06
SURF1	33.5073	18.6995	-0.949783	4.13759e-07	1.77555e-06
FOXP4	2.45762	5.66301	1.10118	4.2832e-07	1.83439e-06
CCDC18	4.41049	9.94699	1.08094	4.28898e-07	1.83635e-06
HLA-DOB	14.0614	31.9788	1.08015	4.32862e-07	1.85227e-06
GINS4	4.715	10.703	1.08293	4.34404e-07	1.85781e-06
VWA8	2.32503	5.36642	1.09395	4.3659e-07	1.86663e-06
HAUS5	5.27466	11.8289	1.07945	4.4635e-07	1.90567e-06
MANEAL	5.33549	12.0636	1.08375	4.55776e-07	1.94261e-06
VPS9D1-AS1	2.38212	5.69748	1.13876	4.64848e-07	1.97904e-06
FOXM1	20.8472	46.6638	1.07206	4.65544e-07	1.98089e-06
LHFP	7.08276	16.2104	1.09791	4.71865e-07	2.00609e-06
DNMT1	31.7098	70.5848	1.06917	4.79438e-07	2.03599e-06
SPI1	26.3176	58.8452	1.07109	5.18311e-07	2.19613e-06
PIN4	26.1625	14.678	-0.941557	5.20599e-07	2.20397e-06
IFIH1	8.64143	4.83015	-0.940471	5.80276e-07	2.45249e-06
TTK	13.0113	28.7662	1.06381	5.87714e-07	2.48254e-06
TSPAN13	16.7324	9.40098	-0.937574	5.98798e-07	2.52748e-06
FOXRED2	2.92202	6.60261	1.07482	5.98856e-07	2.52748e-06
SDF2	39.4798	22.4576	-0.9265	6.33608e-07	2.66819e-06
SETDB2	6.31027	14.0898	1.06165	6.38162e-07	2.68587e-06
DIAPH3	3.5764	8.06638	1.06679	6.54144e-07	2.74853e-06
TCF3	65.2994	142.311	1.05367	6.74555e-07	2.83272e-06
CDCA8	27.7661	60.7622	1.05388	6.88314e-07	2.88969e-06
MYL12A	373.665	215.047	-0.911493	6.89529e-07	2.89399e-06
KIF11	22.2356	48.621	1.05204	7.13544e-07	2.9898e-06
BAG2	9.79346	21.7713	1.0598	7.14318e-07	2.99221e-06
PRRC2A	25.8065	57.1288	1.05195	7.16844e-07	3.00112e-06
SUGP2	14.1345	31.1381	1.05249	7.23247e-07	3.02709e-06
RAD54L	9.60975	21.1253	1.0524	7.29809e-07	3.05287e-06
INCENP	7.69661	17.0941	1.05866	7.32149e-07	3.0618e-06
KNTC1	6.71477	14.8192	1.05245	7.35185e-07	3.07365e-06
STRBP	31.9665	69.679	1.05025	7.35524e-07	3.07422e-06
CHD7	2.02311	4.5483	1.0632	7.38294e-07	3.08494e-06
MTHFD1L	18.4062	40.6279	1.05263	7.40807e-07	3.09458e-06
WDR90	2.37759	5.28155	1.05682	8.05493e-07	3.35367e-06
RRP7BP	7.10323	15.8231	1.05569	8.07641e-07	3.36168e-06
DIS3L	9.3465	20.6849	1.0497	8.36191e-07	3.47764e-06
AK3	31.0492	17.9111	-0.908769	8.49189e-07	3.52781e-06
PUS7	7.8059	17.3791	1.05517	8.49902e-07	3.52981e-06
PEX5	27.0945	59.1945	1.04495	8.6041e-07	3.5705e-06
RLTPR	13.6209	29.7182	1.04144	8.87788e-07	3.68007e-06
ZNF226	8.10871	4.53422	-0.943971	9.14142e-07	3.78308e-06
UBE2H	25.0952	14.5516	-0.904734	9.45811e-07	3.91011e-06
ACER3	5.5856	3.20657	-0.914876	9.96178e-07	4.10458e-06
RER1	43.673	25.3952	-0.901352	1.03454e-06	4.25438e-06
TRAPPC2B	14.7693	8.10302	-0.953797	1.11807e-06	4.57932e-06
IL10RA	7.49697	16.4843	1.04203	1.12175e-06	4.59317e-06
H3F3B	246.223	143.551	-0.893875	1.13221e-06	4.63348e-06
PRKCE	3.73131	8.17797	1.03888	1.15582e-06	4.72454e-06
ARHGEF39	2.42439	5.42661	1.05292	1.16219e-06	4.74715e-06
SHPRH	1.94081	4.29838	1.05215	1.1798e-06	4.81519e-06
TAX1BP1	40.6817	23.6925	-0.893312	1.30389e-06	5.30301e-06
CDC6	15.5075	33.7342	1.02767	1.31587e-06	5.34453e-06
ZNF473	2.68525	5.916	1.04138	1.32681e-06	5.38605e-06
NEK4	5.85084	12.826	1.0394	1.3925e-06	5.6406e-06
DARS2	10.2833	22.2675	1.02897	1.40149e-06	5.67549e-06
POLR3G	6.27347	13.8447	1.04743	1.4368e-06	5.81226e-06
CDC25A	11.839	25.4349	1.02104	1.4497e-06	5.86285e-06
NUP155	6.59052	14.2959	1.02384	1.55923e-06	6.29402e-06
MFSD11	9.82304	5.65776	-0.906246	1.58226e-06	6.38359e-06
LRRK1	4.83136	10.3762	1.01741	1.62354e-06	6.5466e-06
C11orf95	2.33995	5.13999	1.04026	1.64035e-06	6.61265e-06
TFDP1	94.5232	202.102	1.01272	1.7214e-06	6.93383e-06
TMSB10	1386.57	812.02	-0.879243	1.72279e-06	6.93755e-06
NEURL4	4.4673	9.65187	1.01916	1.73525e-06	6.98402e-06
SHFM1	526.06	309.067	-0.880358	1.74817e-06	7.03037e-06
DHX34	4.10307	8.92496	1.02142	1.82803e-06	7.34374e-06
IVD	6.97597	14.8868	1.01217	1.8286e-06	7.34408e-06
ARFGAP3	16.1113	9.33757	-0.890239	1.86989e-06	7.49994e-06
SMC4	51.1886	107.991	1.008	1.8782e-06	7.52927e-06
CNTRL	9.74841	20.8603	1.00844	1.89595e-06	7.59838e-06
PNPT1	10.8078	23.1872	1.01152	1.91827e-06	7.68378e-06
ZNF253	3.42034	7.60326	1.04655	2.02558e-06	8.09e-06
ATAD5	3.11077	6.6628	1.00914	2.06472e-06	8.24198e-06
MTRNR2L6	7.89222	4.45606	-0.93889	2.09516e-06	8.35241e-06
ATG4A	11.8199	6.86369	-0.89562	2.11064e-06	8.40527e-06
CENPH	40.7941	85.6056	1.00299	2.14819e-06	8.54805e-06
MSH2	31.7094	66.8846	1.00255	2.156e-06	8.57686e-06
DHX37	7.10304	15.2555	1.00412	2.19142e-06	8.71087e-06
GAMT	17.4664	37.6241	1.00983	2.19699e-06	8.73074e-06
ZBTB18	4.45475	9.67098	1.01496	2.20183e-06	8.74764e-06
BPTF	7.63634	16.391	1.00294	2.21151e-06	8.77919e-06
CHMP2A	101.802	59.7715	-0.876571	2.21377e-06	8.7854e-06
LUZP6	135.292	80.4505	-0.870247	2.23125e-06	8.85055e-06
E2F8	8.19171	17.2924	1.00416	2.24425e-06	8.89512e-06
GUSBP4	2.42404	5.5147	1.09793	2.26585e-06	8.97367e-06
POLR2D	22.8583	48.6913	1.00231	2.31587e-06	9.16936e-06
LRCH3	2.3564	5.29926	1.05898	2.46734e-06	9.75631e-06
STAT5B	8.3191	17.8346	1.00118	2.58609e-06	1.02071e-05
TIMELESS	18.692	39.3437	0.992979	2.60917e-06	1.02929e-05
HIBCH	32.9912	19.4749	-0.873768	2.62823e-06	1.03653e-05
BCL7A	24.0835	50.7469	0.992317	2.64148e-06	1.04149e-05
ARHGAP11A	14.3775	30.2811	0.993053	2.69761e-06	1.06279e-05
UTP20	3.3526	7.16374	0.997483	2.80064e-06	1.10194e-05
CLUH	14.8424	31.509	0.992255	2.80255e-06	1.1024e-05
BRPF3	2.79574	6.00827	1.01117	2.80346e-06	1.10247e-05
TPX2	39.7758	83.4281	0.989437	2.81733e-06	1.10735e-05
ITPR3	7.50377	15.9808	0.993212	2.84071e-06	1.11596e-05
EHMT2	13.4979	28.6212	0.989714	2.92744e-06	1.14884e-05
CHMP3	30.3212	18.1773	-0.864623	3.03005e-06	1.18787e-05
SLC25A13	4.56324	10.0157	1.02108	3.03938e-06	1.19122e-05
KIAA1468	9.64113	5.67518	-0.871326	3.04951e-06	1.19426e-05
IKZF3	19.513	41.1576	0.985349	3.06775e-06	1.20047e-05
INPPL1	11.5408	24.3294	0.987283	3.08345e-06	1.2063e-05
FAM162A	144.344	85.7082	-0.862925	3.12844e-06	1.22263e-05
SLC19A1	4.93086	10.6059	0.992552	3.22335e-06	1.2581e-05
NDUFC1	82.9438	48.8162	-0.865646	3.31171e-06	1.29158e-05
PRR12	2.93523	6.29312	0.996189	3.33064e-06	1.2981e-05
NADK2	8.33296	17.7114	0.99275	3.34153e-06	1.30187e-05
HCFC1	9.49453	20.0069	0.982658	3.34943e-06	1.30461e-05
LMTK2	4.03654	2.39665	-0.870603	3.40979e-06	1.3271e-05
ZNF251	2.99977	6.50378	1.01161	3.43951e-06	1.33831e-05
DENND4A	6.50747	13.7042	0.983508	3.48892e-06	1.35684e-05
ASPM	11.4977	23.922	0.980218	3.50785e-06	1.3635e-05
FAM89B	17.7845	10.4176	-0.877295	3.67111e-06	1.42476e-05
ABCB6	5.42269	3.12351	-0.901164	3.6873e-06	1.42994e-05
PPAT	15.7894	32.9081	0.978905	3.69934e-06	1.43388e-05
SLC2A11	2.08945	4.58279	1.0155	3.71634e-06	1.44009e-05
LIMK2	19.6672	11.7036	-0.860001	3.73108e-06	1.44469e-05
MTA1	21.0849	44.2693	0.977994	3.74738e-06	1.44989e-05
ATAD3B	7.8679	16.5428	0.983842	3.76234e-06	1.45456e-05
CRELD2	14.2319	8.28908	-0.882329	3.82558e-06	1.47787e-05
NUF2	35.7388	73.7215	0.975892	3.85784e-06	1.48996e-05
LPP	2.22363	4.73009	0.987248	3.88311e-06	1.49895e-05
SBDS	63.5693	38.0252	-0.855307	3.94145e-06	1.5203e-05
CIT	2.83303	5.98531	0.977813	3.96882e-06	1.52995e-05
NDUFB1	331.269	198.061	-0.852451	4.06087e-06	1.56357e-05
TMEM156	11.2657	23.6176	0.974246	4.13124e-06	1.58904e-05
CHTF18	6.59603	13.7821	0.97336	4.2e-06	1.61467e-05
NRBP1	45.5735	27.3377	-0.851951	4.28661e-06	1.64671e-05
ERP44	27.0295	16.2504	-0.849371	4.39974e-06	1.68845e-05
PAICS	103.292	213.793	0.967983	4.43308e-06	1.70081e-05
NEK2	16.9803	35.3209	0.971673	4.46894e-06	1.7137e-05
TBC1D10A	12.9777	7.65472	-0.868827	4.49038e-06	1.72148e-05
SLC35B1	22.3286	13.2708	-0.861719	4.58035e-06	1.75553e-05
DBNDD2	9.1504	5.19883	-0.894713	4.60895e-06	1.76572e-05
LIG1	22.6683	46.9048	0.965717	4.67254e-06	1.78905e-05
POU2AF1	78.996	161.61	0.964882	4.69074e-06	1.79465e-05
SMAD3	13.7018	8.16902	-0.850185	4.76392e-06	1.82081e-05
CENPE	6.29987	13.1154	0.966666	4.79379e-06	1.83129e-05
TICRR	2.17874	4.59626	0.968529	4.96104e-06	1.8904e-05
NCAPG	20.8845	42.9268	0.963096	4.96392e-06	1.89102e-05
RELT	4.24185	8.922	0.973935	5.02257e-06	1.9124e-05
BORA	6.48346	13.7361	0.9742	5.02892e-06	1.91433e-05
DAZAP2	132.632	79.9737	-0.841272	5.08317e-06	1.93401e-05
TUBE1	4.5338	9.61479	0.98865	5.20025e-06	1.97657e-05
SH3BGRL3	137.353	82.7571	-0.841709	5.27509e-06	2.004e-05
MGAT5	5.4816	11.5026	0.966428	5.279e-06	2.00498e-05
ITFG2	7.2517	15.2539	0.974193	5.29975e-06	2.01236e-05
AKAP9	6.94552	4.20084	-0.844435	5.42505e-06	2.05838e-05
TTC32	10.9695	6.27763	-0.922068	5.47267e-06	2.07541e-05
DZIP3	2.85181	5.94732	0.971801	5.548e-06	2.10186e-05
HLA-DOA	16.2731	33.6497	0.959268	5.55604e-06	2.10438e-05
FAM65B	16.7559	34.2201	0.957857	5.61917e-06	2.12723e-05
LMNB2	27.7457	57.3208	0.9567	5.72651e-06	2.16569e-05
SWAP70	36.3564	74.4328	0.956316	5.76385e-06	2.17818e-05
MYEOV2	157.556	94.7053	-0.843123	5.86303e-06	2.21399e-05
CCNF	9.71639	20.0166	0.956543	5.99788e-06	2.26265e-05
ANKRD32	4.27075	8.82981	0.964346	6.11994e-06	2.30697e-05
ORC1	7.98704	16.5284	0.95603	6.20932e-06	2.33891e-05
TMEM42	16.1148	9.50846	-0.874152	6.33811e-06	2.38504e-05
NACC1	9.92574	20.6883	0.957684	6.42282e-06	2.41511e-05
C18orf25	11.1482	6.74099	-0.840516	6.59291e-06	2.47538e-05
SAMD1	15.313	31.5567	0.953608	6.72831e-06	2.52182e-05
GTF2H2C	2.44987	5.30153	0.979458	6.73968e-06	2.52546e-05
ZNF436	4.45091	2.62851	-0.860818	6.81064e-06	2.55078e-05
ZC3H13	5.40893	11.3678	0.955845	6.85463e-06	2.56598e-05
DAPP1	35.8083	21.5659	-0.834092	6.8858e-06	2.57637e-05
WHSC1	21.842	44.9103	0.945703	7.12653e-06	2.66315e-05
ARHGAP35	4.51223	9.36745	0.95306	7.22478e-06	2.69853e-05
IPO11-LRRC70	12.1196	7.09517	-0.859647	7.26293e-06	2.71076e-05
KIFC1	24.5259	50.0147	0.944261	7.34461e-06	2.74057e-05
TMEM219	52.2911	31.692	-0.8376	7.35885e-06	2.74453e-05
C5orf34	3.19071	6.6879	0.965037	7.64386e-06	2.8438e-05
CKAP2L	7.0926	14.4568	0.946447	7.83931e-06	2.91221e-05
CBX5	19.3029	39.5134	0.940906	7.85095e-06	2.91582e-05
CSE1L	54.9402	112.046	0.940048	8.09152e-06	2.99926e-05
FBXW8	3.31874	6.93678	0.955633	8.13707e-06	3.01467e-05
MAPK3	40.3947	24.5706	-0.830064	8.21057e-06	3.03966e-05
PMS2	5.54031	11.5538	0.955569	8.21406e-06	3.04021e-05
CDIPT	31.6269	19.2193	-0.831458	8.22664e-06	3.04337e-05
BRI3BP	8.04061	16.8742	0.962917	8.31357e-06	3.07403e-05
TMEM208	50.051	30.2271	-0.836273	8.47188e-06	3.1295e-05
APBB3	2.45182	5.2965	0.982077	8.97914e-06	3.30717e-05
CTPS2	5.46504	11.1062	0.942456	9.1814e-06	3.3759e-05
ERF	8.43056	17.4677	0.947726	9.19764e-06	3.38105e-05
KMT2D	2.85043	5.89092	0.937425	9.2342e-06	3.39366e-05
BICD1	1.89112	4.00302	0.964822	9.48547e-06	3.48093e-05
ZNF695	2.3103	5.11103	0.992122	9.65179e-06	3.53852e-05
CCDC138	4.69942	9.75151	0.951669	9.7981e-06	3.59042e-05
MCTS2P	3.57891	7.92607	1.0416	9.83407e-06	3.60272e-05
JUN	9.71007	5.86045	-0.836158	9.86563e-06	3.61341e-05
CDCA2	8.6144	17.4978	0.932923	9.94191e-06	3.6387e-05
POLR1A	5.66297	11.6353	0.932912	9.96657e-06	3.64684e-05
NUCB1	46.7635	28.8199	-0.818546	9.97603e-06	3.64854e-05
IPO5	55.1576	111.486	0.928706	1.01344e-05	3.70018e-05
TROAP	17.6419	36.0018	0.935008	1.01406e-05	3.70157e-05
EXT2	14.4121	8.81357	-0.825594	1.01776e-05	3.71327e-05
RPS29	2042.67	1249.62	-0.813779	1.0207e-05	3.72308e-05
EMC4	86.4833	53.1552	-0.818682	1.04941e-05	3.82227e-05
ZNF142	3.24718	6.67739	0.932908	1.06249e-05	3.86896e-05
LARP1	33.5459	67.9413	0.925873	1.07847e-05	3.92151e-05
ZNF101	7.74376	15.7327	0.932395	1.07983e-05	3.92551e-05
FAM3A	17.7905	10.7952	-0.829566	1.1331e-05	4.11024e-05
RALGPS2	13.2698	26.777	0.92426	1.17669e-05	4.25915e-05
RRAS	11.3924	6.67858	-0.85149	1.20833e-05	4.37055e-05
C20orf27	25.8771	52.3344	0.924119	1.23793e-05	4.47119e-05
CCZ1	19.4449	39.6962	0.930077	1.24783e-05	4.50477e-05
RCCD1	10.7982	21.6954	0.920888	1.29192e-05	4.65837e-05
ALG2	13.4269	8.22371	-0.820248	1.29242e-05	4.65908e-05
ING5	5.32542	10.72	0.922742	1.30147e-05	4.68832e-05
FBXL14	3.81183	7.98314	0.946996	1.30392e-05	4.69605e-05
SH3BP5	11.9409	24.5142	0.923083	1.31797e-05	4.74212e-05
NMI	50.3158	30.7779	-0.810975	1.33431e-05	4.79634e-05
PRR11	8.56077	17.35	0.918653	1.34808e-05	4.84353e-05
BRK1	309.619	191.433	-0.803783	1.35055e-05	4.85126e-05
D2HGDH	5.29117	10.7506	0.926392	1.38021e-05	4.9519e-05
EBP	58.3309	35.7115	-0.809615	1.41777e-05	5.07459e-05
SAR1B	15.2649	9.43835	-0.806321	1.43086e-05	5.11783e-05
ADAT1	2.44255	5.09891	0.962627	1.43392e-05	5.12754e-05
NUFIP1	4.33924	8.86804	0.928799	1.44843e-05	5.17575e-05
POGZ	10.4886	21.0516	0.913506	1.4502e-05	5.17839e-05
CCDC107	14.7441	8.88745	-0.838545	1.45261e-05	5.18578e-05
TRIP13	11.9871	24.0411	0.914681	1.46747e-05	5.23387e-05
SELK	104.219	64.1527	-0.80609	1.49598e-05	5.33181e-05
GINS3	12.5166	25.2265	0.91793	1.50407e-05	5.35684e-05
GTF2I	29.1868	58.6614	0.910593	1.51661e-05	5.39893e-05
TMEM179B	23.7522	14.4814	-0.820783	1.53709e-05	5.46667e-05
SKA3	11.291	22.5724	0.910167	1.58583e-05	5.63185e-05
CKAP5	21.234	42.2272	0.906727	1.58614e-05	5.63185e-05
WDR76	17.8817	35.2938	0.907097	1.58718e-05	5.63423e-05
YIPF4	24.9702	15.3665	-0.809058	1.5949e-05	5.65856e-05
MVP	17.1637	10.534	-0.80651	1.61699e-05	5.73061e-05
H1FX	44.7099	27.1649	-0.805159	1.6516e-05	5.84916e-05
ZNF485	2.32798	4.92125	0.983739	1.67375e-05	5.92482e-05
BUB1	22.1924	43.8899	0.904275	1.67518e-05	5.92781e-05
RFWD3	11.6656	23.2963	0.906306	1.67538e-05	5.92781e-05
LOC101927374	8.9754	5.46185	-0.823816	1.67752e-05	5.93401e-05
SDHAF3	33.8174	20.7971	-0.801207	1.77603e-05	6.27072e-05
SMYD4	3.58441	7.25086	0.91579	1.81981e-05	6.41329e-05
ARHGEF9	2.16586	4.40187	0.930856	1.82714e-05	6.43763e-05
TMEM50A	72.3566	45.2833	-0.792374	1.89074e-05	6.65861e-05
ZWILCH	13.0755	25.9197	0.902356	1.9015e-05	6.69336e-05
LOC81691	2.20128	4.55446	0.934673	1.91365e-05	6.73457e-05
PPCS	29.0597	18.065	-0.798542	1.938e-05	6.81392e-05
AURKA	21.9277	43.4593	0.898793	1.94437e-05	6.83313e-05
HERC2	2.64431	5.26422	0.900041	1.98745e-05	6.98126e-05
SREK1IP1	9.1446	5.71581	-0.796207	2.01302e-05	7.06286e-05
ESPL1	6.47258	12.8387	0.898575	2.05922e-05	7.2166e-05
CHST12	6.05515	3.67735	-0.832101	2.11543e-05	7.39813e-05
MYO9B	9.78502	19.4238	0.894452	2.11616e-05	7.39897e-05
RAD51AP1	16.906	33.0731	0.894055	2.16938e-05	7.57627e-05
ARID5B	7.08046	4.41468	-0.794902	2.19802e-05	7.66389e-05
CHEK2	18.0727	35.6601	0.892999	2.26223e-05	7.87322e-05
C6orf226	7.07402	4.06654	-0.920883	2.28709e-05	7.95791e-05
LMNB1	75.3566	146.88	0.887776	2.31472e-05	8.05219e-05
DHODH	3.75157	7.60899	0.913894	2.324e-05	8.0789e-05
TM9SF1	15.6333	9.75445	-0.795228	2.35793e-05	8.18767e-05
TOP1	75.284	147.129	0.886605	2.37787e-05	8.25095e-05
ACSF2	5.76972	11.8061	0.912244	2.41205e-05	8.36189e-05
CHERP	13.0046	25.6648	0.887902	2.44843e-05	8.48022e-05
RPL7L1	30.2312	60.5936	0.895564	2.46001e-05	8.51838e-05
CABLES2	3.36592	6.73722	0.89383	2.54418e-05	8.80123e-05
MTBP	3.79445	7.54856	0.897669	2.58256e-05	8.92228e-05
PIP4K2C	7.27919	4.50408	-0.798263	2.61081e-05	9.01575e-05
PET100	226.359	142.07	-0.78351	2.63628e-05	9.09746e-05
ABCA1	3.83349	7.70279	0.892601	2.63901e-05	9.10479e-05
PPRC1	9.30973	18.3795	0.883219	2.65766e-05	9.16703e-05
FANCD2	12.0048	23.4404	0.8812	2.71505e-05	9.35857e-05
C14orf119	23.5289	14.8085	-0.782477	2.76042e-05	9.50412e-05
TERF2	16.4615	32.1617	0.87997	2.85104e-05	9.78933e-05
EAPP	47.0152	29.4914	-0.781654	2.85736e-05	9.80883e-05
LUC7L2	25.5842	50.1685	0.878991	2.87317e-05	9.85636e-05
DAZAP1	74.15	144.088	0.876807	2.89583e-05	9.92958e-05
C1QBP	178.689	347.823	0.87698	2.9068e-05	9.96495e-05
ALDH1B1	5.21643	10.3412	0.887998	2.9315e-05	0.000100451
GMIP	8.05855	15.9166	0.881588	2.95104e-05	0.000101029
MRPS31	26.6672	52.5334	0.876164	3.32106e-05	0.000113106
NENF	29.9516	18.6737	-0.786918	3.3686e-05	0.000114622
NDUFA6	89.6598	56.574	-0.771406	3.39341e-05	0.000115414
TOMM40	30.0724	58.5794	0.871272	3.4152e-05	0.000116129
SMG1P3	2.75394	5.49209	0.883022	3.42846e-05	0.000116554
KIF2A	16.3954	32.0845	0.87053	3.44742e-05	0.000117119
NLN	3.29798	6.45062	0.8774	3.46702e-05	0.000117653
KIF18A	7.21789	13.9965	0.872971	3.46869e-05	0.000117683
SEC14L1	29.5568	57.4506	0.868117	3.48161e-05	0.000118042
WDR45	19.5138	12.2096	-0.781863	3.52621e-05	0.000119447
RAVER1	14.5434	28.2901	0.868123	3.53453e-05	0.000119702
ERI1	7.20491	14.0247	0.874164	3.5519e-05	0.000120236
COX7B	595.825	376.921	-0.765499	3.60815e-05	0.000122085
TOP3A	4.81832	9.46994	0.874784	3.66211e-05	0.000123828
STK4	15.6432	30.5511	0.865217	3.73043e-05	0.000126082
LRCH1	6.02652	11.9237	0.87196	3.81437e-05	0.000128746
NSUN2	27.7307	53.6544	0.863931	3.82705e-05	0.000129145
CASP8AP2	4.51554	8.77264	0.868457	3.96272e-05	0.000133514
NAA40	6.41972	12.5256	0.869441	3.99957e-05	0.000134666
TMEM134	30.4974	19.1517	-0.777406	4.13658e-05	0.000139093
PPA2	52.6495	33.418	-0.764321	4.16849e-05	0.00014001
BNIP3L	43.8183	27.8577	-0.760019	4.21873e-05	0.000141634
DTL	9.49666	18.376	0.858638	4.26939e-05	0.000143208
ZZEF1	2.5881	5.08832	0.865638	4.28532e-05	0.00014371
PPT2	5.74098	3.53155	-0.803545	4.43608e-05	0.000148469
RBBP7	114.114	218.588	0.853969	4.51414e-05	0.000151015
RASSF2	15.2997	29.8909	0.8549	4.61705e-05	0.000154252
SETD1A	4.50659	8.75113	0.857246	4.63751e-05	0.000154902
USP34	13.3917	25.8005	0.853172	4.6524e-05	0.00015533
GTF2H2C_2	12.1544	23.4887	0.862219	4.69953e-05	0.000156765
C4orf33	7.05193	4.34982	-0.792266	4.84432e-05	0.000161239
SASS6	4.74864	9.14715	0.858159	4.89966e-05	0.000162973
TRAPPC5	32.5185	20.3426	-0.776563	4.90438e-05	0.000163094
DHX9	53.2045	101.588	0.84875	4.97876e-05	0.000165495
ZNF585A	17.4437	10.9267	-0.781611	4.98904e-05	0.0001658
PKD1P1	8.38892	16.2727	0.851333	5.07301e-05	0.000168553
WRN	3.61663	7.0303	0.857176	5.14391e-05	0.000170759
ILF3	71.3571	136.425	0.844991	5.33761e-05	0.000176839
CCSER2	7.39683	4.73026	-0.759549	5.45034e-05	0.000180455
SUPT16H	57.5945	109.642	0.843149	5.53812e-05	0.000183281
IPO4	14.1639	27.2618	0.845655	5.54952e-05	0.000183618
HDAC7	20.9437	39.9648	0.844209	5.61496e-05	0.000185621
TRPV2	3.08882	6.11382	0.879547	5.69387e-05	0.000188106
C5orf45	4.04584	8.16089	0.886909	5.74681e-05	0.000189813
ZFAND2A	16.0902	10.0584	-0.78652	5.84686e-05	0.00019278
MZT1	25.8871	49.7447	0.84498	5.92294e-05	0.000195119
ATP5I	482.393	308.951	-0.745672	5.95435e-05	0.000196068
FIS1	119.008	76.455	-0.747133	6.1613e-05	0.000202529
MSH6	42.4655	80.2326	0.837586	6.19057e-05	0.000203358
NOC3L	12.4475	23.7395	0.84157	6.2696e-05	0.000205775
CBY1	10.2363	6.34743	-0.780914	6.29752e-05	0.000206602
ARHGEF18	14.7299	28.0347	0.83853	6.33562e-05	0.000207807
RAB4A	18.3284	11.6614	-0.750391	6.36884e-05	0.000208806
FAM200B	5.07858	3.19414	-0.76746	6.39204e-05	0.000209475
DBF4B	3.69902	7.15877	0.844961	6.42538e-05	0.000210476
RNASEH1-AS1	8.94318	17.2853	0.855863	6.44968e-05	0.0002112
KLC2	5.13317	9.99725	0.850155	6.45028e-05	0.0002112
DLG3	7.98459	5.05576	-0.757285	6.4813e-05	0.000212124
PRKAR1B	14.2241	27.0501	0.838535	6.55123e-05	0.000214274
KIF15	10.3926	19.6668	0.83551	6.5572e-05	0.000214422
RBBP5	6.38413	12.2857	0.844724	6.57802e-05	0.00021501
AACS	12.5287	7.94676	-0.749511	6.65477e-05	0.000217237
POLR1B	9.74104	18.6205	0.835368	6.75177e-05	0.000220213
GEMIN5	5.88725	11.2398	0.836998	6.76493e-05	0.000220547
2017-03-05	14.2812	9.19115	-0.746258	6.8784e-05	0.000223908
HMGA1	230.168	433.359	0.831676	6.88234e-05	0.000223987
DCTN6	38.78	24.9018	-0.74773	6.9026e-05	0.000224545
SLC25A15	6.28799	12.2128	0.845012	6.91803e-05	0.000224955
CEP152	3.23307	6.16014	0.836415	6.93532e-05	0.00022542
C22orf46	4.66291	2.99378	-0.756171	6.95884e-05	0.000226087
DDX21	45.8077	87.3658	0.831752	6.99687e-05	0.000227176
TEX2	5.68717	3.65593	-0.752041	6.99933e-05	0.000227208
NDUFA1	365.228	235.804	-0.737645	7.19192e-05	0.000233259
TRIM28	86.4265	162.926	0.828171	7.37371e-05	0.000238867
ALAD	14.9757	9.67253	-0.744158	7.3738e-05	0.000238867
DOT1L	5.25656	10.0329	0.83382	7.37432e-05	0.000238867
RFC1	24.8141	46.6992	0.827861	7.51813e-05	0.000243421
CLK2	18.7846	35.4608	0.830578	7.5483e-05	0.000244293
ZNF133	4.68242	2.93918	-0.77848	7.64637e-05	0.000247307
TYMS	81.2508	151.779	0.826226	7.68682e-05	0.000248563
CHAF1B	9.6074	18.2285	0.829032	7.91984e-05	0.00025566
NDC1	24.1248	45.3202	0.825107	7.9317e-05	0.000255922
LRPPRC	30.3019	57.1856	0.824167	8.02465e-05	0.000258711
MMD	7.9287	15.1069	0.830802	8.15728e-05	0.000262427
RCC2	63.2792	118.486	0.822783	8.20464e-05	0.000263894
PRC1	22.9593	43.2326	0.823307	8.29646e-05	0.000266564
DLGAP1-AS1	4.07337	2.4244	-0.860678	8.35641e-05	0.000268376
DGCR6L	30.8727	19.7946	-0.743548	8.41812e-05	0.000270185
PKMYT1	10.82	20.3988	0.824662	8.42505e-05	0.00027035
HELLS	14.2967	26.7726	0.821633	8.62018e-05	0.000276435
VPRBP	6.58573	12.4978	0.823553	8.63079e-05	0.000276717
GNPTG	22.3956	14.4069	-0.745071	8.69601e-05	0.000278453
MMGT1	13.1522	8.55312	-0.735035	9.00844e-05	0.000287908
SCAF1	7.10626	13.4871	0.825188	9.02646e-05	0.000288423
EIF4G3	10.0275	19.0475	0.82155	9.02992e-05	0.000288472
YIF1A	40.8141	26.4357	-0.736279	9.05236e-05	0.000289128
SHISA5	85.341	55.5732	-0.727508	9.08096e-05	0.00028998
SLC25A32	17.5445	32.9204	0.818584	9.31402e-05	0.000296983
CIC	6.20656	11.7356	0.820357	9.67808e-05	0.000308006
RIPK2	8.0345	15.1317	0.822668	9.81061e-05	0.000311829
SPDL1	15.0887	28.2385	0.815773	9.86808e-05	0.000313524
LRRFIP2	19.5967	12.7261	-0.729755	9.88513e-05	0.000314
CEP164	3.03302	5.78302	0.825708	9.90059e-05	0.000314424
FAM60A	45.4023	85.5665	0.814355	9.90777e-05	0.00031452
EPRS	34.3393	64.3268	0.812551	9.97583e-05	0.000316392
PYCR2	38.2446	71.0406	0.81294	0.00010023	0.000317779
GTF3C4	3.01184	5.79243	0.841503	0.000100467	0.000318461
JADE2	7.49669	14.0977	0.813182	0.000101748	0.000322362
GATAD2A	15.1363	28.4603	0.813712	0.000101761	0.000322362
RCBTB1	8.72295	16.2952	0.813858	0.000104522	0.000330552
RPRD2	5.53676	10.4608	0.814245	0.00010464	0.000330857
C19orf54	3.88341	7.40183	0.825768	0.000105106	0.000332051
NUMB	22.3428	14.5744	-0.724328	0.000105837	0.000334082
POGK	13.5839	25.5715	0.812889	0.000106197	0.000335077
CBX6	8.25615	15.4857	0.810342	0.000106902	0.00033716
SKA1	9.44733	17.6345	0.812782	0.000106939	0.000337206
PGAM5	26.8589	50.3539	0.811323	0.000107376	0.000338304
RPAP3	18.7919	34.9266	0.810048	0.000108391	0.00034136
BUB1B	24.163	44.681	0.807476	0.00010981	0.00034554
SETD6	5.13988	9.70603	0.821745	0.000111234	0.0003498
PRKDC	23.5417	43.7693	0.806209	0.000111493	0.000350541
RRAGA	43.5558	28.2635	-0.722814	0.000112626	0.000353736
AHCTF1	8.03809	15.0118	0.80806	0.000112653	0.000353749
MAP1LC3B	45.0698	29.5246	-0.719545	0.000112964	0.000354577
IRF2BP1	5.77747	10.8697	0.814152	0.00011462	0.000359626
DSCC1	20.0611	37.0575	0.80585	0.000115058	0.000360775
IPO9	4.86582	9.08474	0.807235	0.000115162	0.000361027
TFAP4	12.1446	22.6714	0.807412	0.000115472	0.000361923
MFSD8	5.54676	3.57242	-0.736433	0.00011553	0.000362029
SAT2	19.8597	12.6988	-0.7398	0.000117402	0.000367591
PATZ1	12.3142	22.9517	0.804921	0.000117479	0.000367754
LNPEP	3.65759	6.95164	0.825049	0.000118023	0.000369382
ARF5	140.364	92.1888	-0.716394	0.000118055	0.000369406
NLE1	10.2274	19.2442	0.80836	0.00011934	0.000373134
BLM	8.15712	15.1347	0.803193	0.000119504	0.000373554
C10orf2	15.5279	28.8761	0.802528	0.000124518	0.000388904
CREB3	17.6996	11.536	-0.725395	0.00012489	0.000389983
SLC25A22	5.80181	10.8753	0.81113	0.000128365	0.000400338
TRIM59	12.1979	22.5345	0.801983	0.000128816	0.000401579
IGIP	5.93093	3.82235	-0.741098	0.000129217	0.000402663
VPS28	88.3268	58.0598	-0.714227	0.000132512	0.000412249
OSTC	214.903	142.047	-0.710087	0.000133033	0.000413786
CDC20	46.7658	85.7242	0.797234	0.00013321	0.000414251
TTPAL	4.36649	8.19967	0.805072	0.000133281	0.000414388
XPO4	3.36626	6.28385	0.803224	0.000133487	0.000414943
IRF9	25.2519	16.5442	-0.718672	0.000135168	0.000419736
CHEK1	18.6311	34.2039	0.796751	0.000135504	0.000420432
FBXW7	17.4257	11.4364	-0.715097	0.000135813	0.000421306
PPIP5K1	3.1197	5.87383	0.813425	0.000139189	0.000431245
ZNF277	17.0015	11.2236	-0.716341	0.000143792	0.000444869
PDCD11	11.5254	21.3606	0.793342	0.000144569	0.000446998
GRAMD1A	13.3478	24.7069	0.794419	0.000146672	0.000452757
FAM13B	8.93125	16.6057	0.796663	0.000147674	0.000455665
SUZ12	33.7514	61.9351	0.791517	0.000148157	0.000456877
GRWD1	17.0808	31.5822	0.795095	0.000148918	0.000458941
CACTIN	5.44358	10.1707	0.800502	0.000150183	0.000462651
NUP43	13.6482	25.1628	0.794195	0.000150457	0.000463401
TNPO2	12.6239	23.4692	0.79311	0.000150962	0.000464862
RAD51D	5.13223	9.70407	0.80276	0.000151179	0.000465433
PDK2	10.4534	6.85416	-0.723356	0.000151241	0.00046553
STX7	39.5856	72.7989	0.790816	0.000151834	0.000467069
RRAGB	5.60319	3.61371	-0.745506	0.000153401	0.000471603
HPS5	7.4936	13.9312	0.795554	0.000153816	0.000472684
ZFYVE1	6.02022	3.92149	-0.723204	0.000154046	0.000473296
ATXN2L	26.9099	49.7565	0.789459	0.000154297	0.000473972
CXXC5	10.3548	19.2997	0.808782	0.000156575	0.000480578
TJAP1	5.16606	9.62834	0.798406	0.000156704	0.000480876
HIRA	11.6577	21.5101	0.790909	0.000156952	0.00048144
ME2	24.6917	45.4569	0.788093	0.000157323	0.000482382
SRCAP	6.95652	12.941	0.790009	0.000157387	0.000482482
MIS18A	19.9397	36.5132	0.79057	0.000157597	0.000483028
SLC29A1	27.1748	50.0781	0.789041	0.000159825	0.000489657
TOPBP1	20.6535	37.859	0.787037	0.000160437	0.000491233
CARM1	14.9947	27.8189	0.792225	0.000162508	0.00049727
PCK2	10.3949	19.2714	0.797987	0.000162589	0.000497418
CYB5R3	38.1404	25.1876	-0.702905	0.000163648	0.000500252
CKAP2	30.5491	56.4287	0.786361	0.000166179	0.000507372
FANCI	25.9977	47.4666	0.784424	0.000167345	0.000510831
HMHA1	17.5139	32.2079	0.784467	0.000167438	0.000511012
MACF1	7.58133	5.04956	-0.70092	0.000167758	0.000511677
EP300	7.02802	13.0542	0.788164	0.000168601	0.000514144
TCF19	16.7842	30.7142	0.784601	0.000172199	0.000524588
CEP83	4.97916	9.26942	0.796892	0.000173963	0.000529557
SLC7A6	9.76323	17.9842	0.783966	0.000173971	0.000529557
HJURP	15.8175	28.9063	0.78299	0.00017468	0.000531394
ZC3H4	7.32485	13.5373	0.786371	0.000174838	0.000531768
PKN1	52.8852	96.6933	0.781669	0.000175026	0.000532231
STAG3L3	2.49646	4.81619	0.837196	0.000175373	0.000533074
SLC25A37	6.83457	12.7873	0.796176	0.000179902	0.000545633
ANAPC1	10.8536	19.9572	0.781381	0.000180468	0.000547238
WDR3	13.8073	25.4362	0.783823	0.000180544	0.000547359
UBAP1	34.7878	23.2884	-0.698266	0.000183236	0.000555074
ZNF286A	2.81211	5.24269	0.79493	0.000187085	0.000566395
UBAP2L	32.9383	60.5376	0.778596	0.000188649	0.000570671
STIM2	8.40751	15.4363	0.780235	0.000190533	0.000575792
SLC35A2	11.5495	7.60697	-0.709626	0.000191133	0.000577374
UBC	825.007	549.287	-0.691221	0.000193514	0.000584102
SF1	62.1087	113.513	0.776375	0.000194351	0.000586158
NUP62	25.7381	46.9101	0.776076	0.000198551	0.000598227
POM121C	10.3072	19.0011	0.777149	0.000201479	0.000606224
KDSR	11.0105	7.35913	-0.69706	0.000201486	0.000606224
PER2	3.21568	5.97501	0.78856	0.000201819	0.000607106
C17orf85	5.07216	9.31635	0.779259	0.000202435	0.000608596
C12orf49	14.704	27.0174	0.776716	0.000202828	0.0006096
TAF8	4.97009	9.17008	0.784369	0.000207258	0.000621734
TUBGCP5	5.14791	9.468	0.782031	0.000207548	0.00062211
NCAPD3	9.23947	16.8417	0.774067	0.000207983	0.000623289
NSD1	6.40802	11.8011	0.775166	0.000208086	0.000623473
BRIP1	3.26722	5.95075	0.777355	0.000209109	0.000626415
MCM10	7.6902	14.023	0.773294	0.000210533	0.000630217
AEN	16.0123	29.4394	0.773497	0.000211636	0.00063323
WEE1	28.3889	51.1681	0.770643	0.000220026	0.000656383
CAPN15	5.58843	10.2901	0.778882	0.000222885	0.000664651
UNC50	33.8589	22.5712	-0.695997	0.000228941	0.000681498
TRIM65	6.9221	12.733	0.777371	0.000231865	0.000689573
LOC100093631	34.2572	22.9316	-0.686936	0.000231882	0.000689573
GLTSCR2	180.893	327.038	0.766197	0.000231959	0.000689617
NUP153	17.9996	32.6098	0.767465	0.000232435	0.000690644
AARS2	3.72556	6.82679	0.775778	0.000232471	0.000690644
RABGEF1	20.239	13.5735	-0.689205	0.000235391	0.000698358
POR	17.2586	11.5059	-0.693469	0.000236906	0.000702437
MXD4	13.6294	9.17826	-0.690409	0.000242209	0.000717598
SCAF4	13.6617	24.8004	0.76509	0.000244835	0.000724667
SGOL2	11.0666	19.9092	0.764862	0.000245428	0.000725853
CCZ1B	42.9856	28.6673	-0.685195	0.000251252	0.000742497
MIEN1	72.4772	48.4277	-0.687659	0.000253021	0.000747139
SNX27	4.11348	7.53813	0.768754	0.000257421	0.000759539
ARHGEF2	19.7943	35.5926	0.760899	0.000258201	0.000761392
HMOX2	45.3444	30.4452	-0.684061	0.000259608	0.000765094
TRMT61A	5.43372	9.92286	0.768334	0.000261741	0.00077123
TAF4	4.81708	8.77867	0.770429	0.000267124	0.00078663
RBL1	5.0689	9.21348	0.763325	0.000271109	0.000797742
CPSF7	22.7118	40.9666	0.759216	0.000271903	0.000799923
SIAH2	19.0414	12.7639	-0.684797	0.00027276	0.000801975
JRK	4.09323	7.49627	0.765367	0.000276149	0.000811309
S100PBP	9.04672	16.3043	0.759665	0.000276793	0.000813042
TRAPPC3	68.1871	46.0723	-0.679481	0.000278569	0.000817465
MOB1A	54.8071	99.1044	0.759539	0.000282413	0.000827457
SMARCD1	21.2674	38.3325	0.756146	0.00028482	0.000834185
FLVCR1	3.08029	5.57337	0.761526	0.000286981	0.000840026
TMCO6	6.31002	11.5825	0.771204	0.000288521	0.000844208
PPP1R2	31.3799	21.1293	-0.67752	0.000288899	0.000845151
EIF4G1	48.5503	87.9088	0.754188	0.000290439	0.000849162
TTI1	7.59572	13.7662	0.758805	0.000294771	0.000861328
ATPAF1	25.8039	46.5702	0.757607	0.000295615	0.000863062
CEP85	8.83684	15.9681	0.759007	0.000295651	0.000863062
USP24	7.22725	13.0988	0.754162	0.000300212	0.000875361
PTK2B	28.7413	51.534	0.751429	0.000302481	0.000881808
MRPL33	176.168	118.143	-0.675499	0.000311519	0.000905883
ATXN2	4.58215	8.35035	0.759283	0.000316973	0.00092121
OST4	356.931	242.302	-0.670837	0.000317787	0.0009234
COLGALT1	17.286	31.2033	0.752352	0.000320354	0.000930678
C1orf112	4.6385	8.36328	0.755214	0.00032504	0.000944004
BAHD1	7.0668	12.8583	0.759499	0.000327048	0.000949212
ANXA11	87.2571	58.9268	-0.669012	0.000327183	0.000949421
TRMT6	19.717	35.2939	0.74902	0.000330532	0.000958404
REXO1	5.26166	9.52399	0.755881	0.000333603	0.000966565
CLSTN1	29.6126	53.3975	0.746639	0.000336902	0.000975561
U2AF2	60.4821	107.825	0.744332	0.0003436	0.000994004
MMACHC	2.41648	4.47936	0.782672	0.000350169	0.00101146
ATP2B1	9.73883	17.5258	0.746746	0.000350623	0.0010123
SF3A1	22.7634	40.8532	0.74365	0.000355744	0.00102619
NAT10	28.4806	50.8018	0.742085	0.000356202	0.00102731
PTBP1	71.2325	127.112	0.742127	0.000357467	0.00103037
KDM2B	16.1835	28.8619	0.742081	0.000366021	0.00105402
TMEM248	38.8021	26.4797	-0.664524	0.000366457	0.00105507
USMG5	189.234	128.387	-0.667426	0.000366733	0.00105567
BBIP1	11.0232	7.31879	-0.68157	0.000367423	0.00105725
ADRBK1	70.367	124.749	0.739928	0.000368584	0.00106019
ST3GAL2	3.99562	7.21054	0.748819	0.000372845	0.00107142
ASXL1	12.7123	22.7013	0.739994	0.000379828	0.00109066
HEATR1	8.55654	15.3247	0.740053	0.00038015	0.00109117
FAM208B	6.68973	11.9278	0.741826	0.000385394	0.0011058
PSMD10	60.6055	41.2708	-0.664113	0.00038596	0.00110722
MIEF1	9.64771	17.3073	0.740526	0.000391447	0.0011221
RPL36AL	685.919	466.959	-0.659619	0.000391878	0.00112313
MCCC2	19.1459	34.0642	0.73843	0.000395019	0.0011317
KMT2B	4.50848	8.11551	0.742013	0.0003975	0.00113838
NUP107	28.0945	49.7515	0.736159	0.000400295	0.00114573
TIMM23B	3.85411	7.00684	0.760585	0.000400426	0.00114589
POLD3	10.0669	17.8787	0.73803	0.000404224	0.00115588
NOL9	5.09051	9.10423	0.739531	0.000405857	0.00116011
LIMK1	15.0807	26.8703	0.736686	0.000409329	0.00116915
NDUFS4	56.9664	38.3834	-0.668732	0.000409965	0.00117074
MDN1	4.1298	7.39212	0.735181	0.000410885	0.00117292
ZSCAN29	4.02224	7.22378	0.743415	0.000411043	0.00117293
CEP192	3.88097	6.89667	0.737957	0.000411423	0.00117379
ACAT1	40.6603	71.6901	0.734371	0.000416501	0.00118738
MUM1	5.62182	10.0335	0.741441	0.000418324	0.00119191
MEN1	16.3824	29.1252	0.734445	0.000424669	0.00120862
TGIF2	13.9248	24.5941	0.732746	0.000427184	0.00121463
NAF1	6.0493	10.9119	0.751258	0.00042843	0.00121794
ARV1	16.0907	10.8238	-0.672967	0.00043149	0.00122618
CAMKK2	10.9023	19.4214	0.734409	0.000434869	0.00123475
C2orf44	6.23652	11.0959	0.735947	0.000434913	0.00123475
LAMTOR4	152.6	104.189	-0.659028	0.000434915	0.00123475
RPIA	37.8985	66.856	0.731559	0.000439097	0.00124592
ZMYM3	6.8729	12.2317	0.732514	0.00044299	0.00125579
PARP8	2.81656	5.12215	0.748207	0.000447829	0.00126856
ATP6V1F	282.668	193.878	-0.653238	0.000456752	0.00129286
EED	31.4873	55.3096	0.729553	0.00045837	0.00129695
TBC1D5	7.46258	13.2951	0.729172	0.000481811	0.00135997
TGS1	13.9916	24.8081	0.728236	0.000482689	0.00136219
GPALPP1	12.8244	23.0714	0.741565	0.000484287	0.00136619
PRIM1	16.9639	30.0691	0.732724	0.000485342	0.00136891
C2CD3	2.51728	4.48424	0.730529	0.000493363	0.00139049
TMTC4	3.88717	6.96997	0.738514	0.000499252	0.00140602
SUV39H2	9.90542	17.4872	0.727817	0.000504115	0.00141815
PPAN	15.3585	27.3248	0.727091	0.000507918	0.00142805
PARPBP	9.56029	16.8596	0.728671	0.000514184	0.00144459
TIPIN	16.5079	29.0965	0.727436	0.000521066	0.00146257
KIF23	13.7693	24.1234	0.721362	0.000525957	0.00147575
EHMT1	18.3586	32.085	0.720007	0.000526094	0.00147578
COX6C	283.672	194.516	-0.646051	0.00052928	0.00148369
ZNF397	3.32943	6.11762	0.774419	0.000530568	0.00148675
MON1B	5.43072	9.69384	0.735467	0.00053321	0.0014936
ZDHHC2	5.31527	9.41092	0.730678	0.000537605	0.00150479
SPEN	5.55301	9.82762	0.720624	0.000538479	0.00150668
SRPRB	39.4991	27.2742	-0.646332	0.000548717	0.00153391
MTMR3	4.90557	3.38653	-0.650458	0.000561822	0.00156938
YEATS2	10.2227	17.9069	0.717107	0.000567855	0.00158464
NFXL1	2.91482	5.21622	0.744544	0.000573677	0.00159895
KDM3A	16.8797	11.6875	-0.644822	0.000586928	0.00163317
C16orf95	3.10773	5.83632	0.775904	0.000587091	0.00163332
TCTA	14.5825	9.9956	-0.653074	0.000588033	0.00163564
SNRNP70	74.981	130.352	0.712937	0.000588522	0.0016367
ZNF787	5.94638	10.5203	0.727521	0.000589392	0.00163882
VPS37A	7.11077	4.86067	-0.652832	0.000590218	0.00164073
EDEM1	22.4252	39.2797	0.713969	0.000590433	0.0016408
ZC3H7B	10.1675	17.936	0.715413	0.000599118	0.00166341
CENPL	5.18936	9.20926	0.731056	0.000603677	0.00167576
MTFR1L	14.8513	10.1798	-0.652313	0.000604102	0.00167663
SMARCC1	31.4631	55.1202	0.711657	0.000605211	0.0016794
PTCD1	2.53492	4.51612	0.728773	0.000605668	0.00168036
SEC61B	204.655	140.319	-0.641358	0.000608864	0.0016883
TAF5L	9.2687	16.3058	0.719002	0.000612067	0.00169686
LCMT1	28.1251	19.3237	-0.64862	0.00061247	0.00169753
RGS14	15.8157	10.8878	-0.647601	0.000614083	0.00170152
RAB11FIP3	7.52636	13.2334	0.714466	0.000625649	0.00173166
TKFC	5.33696	9.38333	0.714358	0.00063611	0.00175738
UPF1	16.0883	28.1152	0.709767	0.000636305	0.00175738
NAGK	40.7711	28.1333	-0.639208	0.000652517	0.0017991
CHORDC1	25.3745	44.0635	0.707462	0.000660599	0.00181906
URB1	2.93619	5.1868	0.712785	0.000666681	0.00183514
RNASEK	111.477	77.2839	-0.63691	0.000670524	0.00184474
SBF1	11.5829	20.2865	0.707101	0.000671907	0.00184817
LRRC61	3.20286	5.74984	0.744127	0.000674679	0.00185546
EMC2	45.4381	31.4121	-0.639648	0.000676456	0.00186001
ESF1	11.1692	19.5907	0.710133	0.000681147	0.00187188
FKRP	2.43889	4.34903	0.734182	0.000693012	0.0019031
FAM104B	20.892	14.3413	-0.648475	0.000693848	0.00190434
TPP2	13.9939	24.2953	0.704454	0.000700607	0.00192187
NFS1	11.1184	19.4045	0.708248	0.000704283	0.0019309
EDF1	421.725	292.766	-0.631435	0.000706681	0.00193641
CNNM3	3.27425	5.76656	0.715739	0.000708202	0.00193953
PLK4	12.011	20.7047	0.702302	0.0007167	0.00196173
HIP1R	10.7452	18.7878	0.704886	0.000718243	0.0019656
HSPH1	54.1833	94.0713	0.700612	0.000724653	0.00198278
PFDN5	694.586	483.909	-0.629297	0.000727816	0.00199108
APITD1	11.718	20.6548	0.718147	0.000729028	0.00199403
WDR77	33.3883	57.4489	0.700905	0.000734786	0.0020076
BLOC1S2	33.7195	23.3077	-0.633011	0.00073786	0.00201469
SENP2	11.6191	20.3033	0.706634	0.000738497	0.00201591
LSM1	46.1132	31.938	-0.636064	0.000753284	0.00205405
SGOL1	9.41311	16.3142	0.701459	0.000755583	0.00205958
ZMYND19	18.9187	33.0293	0.704175	0.000755902	0.00206008
SKP2	15.0819	26.2189	0.704174	0.000759277	0.0020689
DDIAS	5.00442	8.7279	0.705094	0.00075946	0.00206902
ATP6V1E1	91.0242	63.3686	-0.6297	0.000759642	0.00206915
KCTD20	21.3969	37.3223	0.699666	0.00077513	0.00210905
TMEM101	24.759	17.1968	-0.636522	0.000775998	0.00211103
ATRAID	78.8814	55.1251	-0.629982	0.00078219	0.0021275
COX14	76.8237	53.1679	-0.632406	0.000791461	0.00215077
SRPK1	32.8777	56.5163	0.693121	0.00082984	0.00224738
PDCD7	11.9495	20.7193	0.698347	0.000830683	0.00224927
PHF20	5.98949	10.4254	0.698963	0.000836051	0.00226299
RWDD1	74.9731	52.3413	-0.625589	0.000841732	0.00227673
YIPF3	35.4607	24.7615	-0.628355	0.000842286	0.00227742
TFAM	24.2078	41.4125	0.692378	0.000844978	0.00228428
ZNF410	34.5555	24.2277	-0.625254	0.00085321	0.00230365
TFG	39.0031	27.3034	-0.626232	0.000855144	0.00230846
NEU1	11.4623	7.94524	-0.635333	0.00085829	0.00231612
GNL3L	4.63366	8.09411	0.694571	0.000868239	0.00234088
ZHX2	14.6626	25.1019	0.688595	0.000885231	0.00238202
INPP5B	8.06458	13.8721	0.691723	0.00090902	0.00244168
MPHOSPH9	7.86692	13.5652	0.688602	0.000910182	0.00244393
ING4	31.1949	21.673	-0.62687	0.000916277	0.00245767
FAM193A	4.92449	8.57991	0.694489	0.00092076	0.00246838
SMC6	11.3178	19.4638	0.68829	0.000935365	0.00250398
SBNO1	8.73179	15.1016	0.686857	0.000939689	0.00251466
UBA2	93.7671	159.685	0.685095	0.000942029	0.00252048
RIF1	7.40612	12.7298	0.685923	0.000955011	0.00255205
ALKBH8	3.75798	6.51732	0.695684	0.000975182	0.00260273
SNRNP48	6.26317	10.7846	0.691434	0.000976968	0.00260703
RABEP1	17.8937	30.5689	0.683017	0.000994052	0.00264934
BUD31	79.0688	55.3838	-0.617593	0.000999735	0.00266355
DNAAF5	8.70438	14.966	0.687113	0.00100958	0.00268836
MAP2K7	8.10617	13.9621	0.687392	0.00101454	0.00269965
ZBTB2	10.2267	17.6269	0.683912	0.00101553	0.00270181
PABPN1	27.3013	46.6573	0.681267	0.00101698	0.00270473
AGL	5.28482	9.08284	0.686636	0.0010214	0.0027141
WDR43	29.5175	50.5655	0.681169	0.00102754	0.00272924
GEMIN4	11.5448	19.7558	0.680809	0.00102948	0.00273268
SLC39A14	8.70683	15.0506	0.686055	0.00103475	0.00274424
RAD52	3.13425	5.5045	0.703492	0.00104036	0.00275526
CCT2	180.542	307.004	0.678652	0.00104114	0.00275684
CSNK2A2	16.8788	29.1876	0.686924	0.00104214	0.00275902
DDX54	23.9781	40.9969	0.678876	0.00104358	0.00276184
PRRC2B	13.2144	22.7756	0.679355	0.00104532	0.00276595
UTP15	5.08653	8.74367	0.684424	0.00107995	0.00284862
MARS2	6.69187	11.5766	0.683857	0.0010831	0.00285591
BMS1	8.82128	15.1345	0.677052	0.00110176	0.00290159
CINP	37.8828	26.4735	-0.618771	0.00110473	0.00290839
PMS1	10.589	18.0207	0.678591	0.00110665	0.00291294
ABHD10	13.6713	23.3603	0.679172	0.00111189	0.00292572
RSF1	4.96268	8.55605	0.683013	0.00111617	0.00293543
ZNF134	4.96667	3.42229	-0.640896	0.00111928	0.00294209
TMEM99	6.67577	4.5987	-0.636567	0.00112108	0.00294578
MRE11A	7.58544	12.9169	0.676935	0.00112555	0.00295702
PPP4R2	21.3224	36.7244	0.684113	0.00113094	0.00296912
GANC	4.67865	8.19381	0.704147	0.00113391	0.00297588
AUNIP	3.4943	6.10713	0.691443	0.00113569	0.00298004
DPP9	7.81728	13.4748	0.68215	0.00113735	0.00298336
PMM1	20.8928	14.5302	-0.620135	0.00114083	0.00299143
TUBGCP4	5.53277	9.50888	0.680095	0.00114193	0.00299381
C8orf76	34.0016	23.8883	-0.614822	0.0011447	0.00299899
REPIN1	24.1075	41.0954	0.675024	0.00115063	0.00301242
GUF1	8.29441	14.2307	0.677968	0.00115195	0.00301483
USP22	35.9749	61.356	0.672897	0.00115653	0.00302577
CALCOCO2	21.3738	15.2055	-0.609629	0.00115739	0.00302749
UQCRB	103.715	73.3434	-0.605154	0.00117478	0.00306661
CYB5A	85.9965	60.4993	-0.610077	0.00117668	0.00307105
FXN	3.92255	6.73148	0.680793	0.00118066	0.00307983
ANKRD40	10.6635	18.3347	0.675778	0.00119542	0.00311402
MELK	19.4631	32.9509	0.673257	0.00120067	0.00312608
MLH3	2.95666	5.09761	0.675903	0.00120335	0.00313197
SLC7A1	12.1833	20.9005	0.673038	0.00120925	0.00314679
MRPS33	174.764	123.261	-0.606389	0.00121474	0.00316055
SKIV2L2	24.6638	41.7936	0.670548	0.00121797	0.00316841
NUP210	26.1416	44.424	0.66858	0.00122211	0.00317642
SEC24A	8.92115	6.30085	-0.609474	0.00123879	0.00321535
TBK1	12.8384	21.848	0.675041	0.00124099	0.00321997
BDP1	4.73708	8.04068	0.67119	0.00124701	0.00323392
C7orf25	10.6939	7.5212	-0.621603	0.00132498	0.00342025
DVL3	9.08333	15.4941	0.66903	0.00132824	0.00342693
MLLT1	9.29055	15.8656	0.668972	0.00133171	0.00343528
ISG15	37.3697	25.959	-0.613907	0.00133847	0.00345213
HNRNPDL	65.9838	111.602	0.662362	0.00136047	0.00350469
ATR	4.50233	7.67824	0.667621	0.00136348	0.00351124
G6PD	20.3573	14.4279	-0.603937	0.00137591	0.00354083
NUMA1	19.4226	33.0638	0.662888	0.0013791	0.00354844
IQCH-AS1	4.68009	8.25189	0.705719	0.00138309	0.00355688
SMARCC2	17.0438	28.9106	0.662591	0.00138816	0.00356872
PSPC1	33.7277	56.5837	0.66212	0.00139043	0.00357333
PDS5A	28.2026	47.579	0.66091	0.00140469	0.00360812
TUBGCP3	12.3851	20.9206	0.662916	0.00143836	0.00368835
UIMC1	20.9806	35.2351	0.660216	0.00143916	0.00368977
RHBDF2	7.02225	11.9954	0.671185	0.0014482	0.00371168
DVL2	10.1622	17.1506	0.6632	0.00145577	0.00372856
THG1L	18.8809	31.8804	0.664579	0.00147285	0.00376975
FAM134C	22.6908	16.1613	-0.596867	0.00147853	0.00378173
CBFB	42.4988	71.0578	0.657539	0.00148927	0.00380533
FAM86DP	2.42599	4.23123	0.690474	0.00149118	0.00380892
U2SURP	18.5363	31.1417	0.655661	0.00152879	0.00389774
ACTR8	6.00876	10.1903	0.661343	0.00153398	0.00390964
WDR81	4.14426	7.05182	0.664035	0.00156684	0.00398734
GMEB1	4.13638	7.07495	0.668926	0.00159244	0.00404687
NOP14	26.348	44.2944	0.653023	0.00159265	0.00404687
GTF2IP1	30.4716	21.5454	-0.592218	0.00160226	0.00406994
SF3A3	47.6313	79.5801	0.652314	0.0016049	0.00407596
PIBF1	6.3423	10.7775	0.662622	0.00168506	0.00426661
RNF219	11.1836	18.7386	0.650339	0.00173282	0.0043802
MBLAC2	3.27573	5.59104	0.668327	0.0017559	0.00443409
POLR3B	4.15837	7.04538	0.659777	0.00176874	0.00446056
ST3GAL3	2.41843	4.21609	0.684059	0.00177675	0.00447924
USP36	6.61252	11.1794	0.649026	0.0017862	0.00449843
TCERG1	25.1939	41.8331	0.645807	0.00178644	0.00449843
CAMSAP1	6.19606	4.44158	-0.589541	0.00181247	0.00455864
MRPL4	45.2485	75.4848	0.646207	0.00181748	0.00457048
SCO1	17.3408	29.1113	0.650121	0.0018248	0.00458737
CDK12	6.49204	10.9361	0.646403	0.001859	0.00466868
BCL2L11	10.8844	18.2252	0.645418	0.00186267	0.00467711
HAUS2	9.9672	16.649	0.649059	0.00186935	0.00469311
KPNB1	76.2929	126.809	0.64094	0.00191372	0.00480051
SWI5	16.3225	11.5054	-0.600899	0.00192428	0.00482541
CCT8	243.448	403.764	0.639563	0.00194681	0.00487785
GART	41.1716	68.2258	0.639737	0.0019615	0.00491301
MICA	5.96859	4.14534	-0.614359	0.00197507	0.00494373
LARS2	7.14123	11.9118	0.642788	0.00200988	0.00502413
MTRF1	4.95158	8.4319	0.666638	0.00201036	0.00502413
TADA2A	11.2972	19.0099	0.646735	0.00204197	0.00509513
SMC3	36.291	59.8247	0.634912	0.00211907	0.00527706
CBL	3.69603	6.19315	0.639083	0.00212136	0.00528189
DNAJC1	11.7265	8.39169	-0.588119	0.00212648	0.0052929
RSRC1	14.5147	24.1987	0.642714	0.00212854	0.00529715
ECT2	13.6866	22.5806	0.637229	0.00213815	0.00531844
TGFBRAP1	5.09464	8.52987	0.63877	0.00214452	0.00533164
CENPO	7.26719	12.069	0.63667	0.0021481	0.00533879
HNRNPD	226.7	372.338	0.632738	0.00216256	0.0053703
TAF15	139.96	231.597	0.631165	0.00222345	0.00551065
TPR	15.4101	25.5546	0.630888	0.00225598	0.00558759
XPOT	39.7645	65.8463	0.631306	0.00226911	0.00561643
ZNF316	3.07545	5.13427	0.637268	0.00232645	0.00574623
BRD4	11.3431	18.9352	0.631876	0.00234651	0.00578808
SART3	18.1492	30.0809	0.628166	0.00236699	0.00583098
DIS3L2	3.93581	6.62665	0.640954	0.00241463	0.00593575
ANKRD52	4.97637	8.29529	0.629636	0.00243212	0.00596807
SETD2	12.0359	19.9528	0.625803	0.00247908	0.00606947
ZCCHC3	12.1667	20.1837	0.627131	0.00248262	0.00607717
CTCF	29.8995	49.1124	0.624244	0.00250965	0.00613936
OSBPL11	7.99673	13.2151	0.628875	0.00252518	0.00617536
RRP1B	18.3429	30.2109	0.622412	0.00256568	0.00626729
XPO1	57.7273	94.3826	0.621098	0.00261136	0.00636752
EPS15	26.2831	43.172	0.620338	0.00270789	0.00658483
CSRP2BP	6.32504	10.4743	0.62368	0.00273708	0.00664619
SEPHS1	29.3214	47.9737	0.618656	0.00273873	0.00664913
SETD8	27.3722	45.0599	0.621356	0.00275503	0.00668654
NCBP1	14.9343	24.469	0.617535	0.00282939	0.00685741
CEP57L1	4.13544	6.8535	0.638613	0.00286568	0.00694283
BCL2L12	13.9741	22.939	0.618897	0.00287528	0.00696498
EYA3	6.65424	10.9756	0.620495	0.00289141	0.00699842
NOM1	5.37576	8.84467	0.617442	0.00292189	0.00706426
TAF3	2.9754	4.98455	0.635861	0.00296692	0.0071571
GMPS	40.3337	65.3362	0.612609	0.00299452	0.00721793
MTOR	5.80992	9.56003	0.614913	0.00300132	0.00723315
BIRC6	5.2012	8.54945	0.613677	0.00300404	0.00723856
STX16	15.3076	25.2382	0.615151	0.00300563	0.00724023
HNRNPM	153.808	249.83	0.611478	0.0030057	0.00724023
NFRKB	5.62299	9.29887	0.618844	0.00301836	0.00726671
PIP5K1A	15.587	25.457	0.614526	0.00304404	0.00732093
HPS3	7.93013	12.9557	0.61392	0.00304869	0.00733055
DDX46	16.9537	27.6457	0.611963	0.0030495	0.00733055
DDX18	37.3442	60.7034	0.611188	0.00305168	0.00733462
POLR3E	12.8751	21.1028	0.611905	0.00310148	0.00744628
NAA16	4.58985	7.58875	0.622047	0.0031073	0.00745881
FDXACB1	2.84302	4.72158	0.624595	0.00312557	0.00749909
DCAF7	23.0888	37.7449	0.608463	0.00319738	0.007658
FAM120A	36.333	59.5142	0.608475	0.00320104	0.00766554
IRAK1	33.7167	54.9344	0.60776	0.00325496	0.00778603
TSEN2	5.91871	9.84133	0.622602	0.0033164	0.00791794
PDHA1	26.2426	42.5315	0.605187	0.00336132	0.00801631
ITPKB	4.88635	8.02885	0.611228	0.00338944	0.00807437
PATL1	13.0444	21.2191	0.606575	0.0034023	0.00810124
ZNF687	3.95221	6.51875	0.615396	0.00344584	0.00819974
SRRM1	36.0475	58.4181	0.603139	0.00345044	0.0082094
POLR1E	20.3581	33.1747	0.604912	0.00347967	0.00827113
DKC1	71.9966	116.453	0.601796	0.00349711	0.00830867
G3BP1	79.3992	128.532	0.600748	0.00356431	0.00845237
GNB1	94.7132	153.659	0.600243	0.00358984	0.00850755
CPNE1	46.761	76.3429	0.601921	0.0035997	0.00852846
ESCO1	6.8003	11.1085	0.607452	0.00359979	0.00852846
HNRNPL	179.953	290.287	0.599319	0.00362288	0.00857241
SCAF8	11.1846	18.2028	0.602741	0.00364076	0.00860932
TEX10	16.6432	27.0597	0.601136	0.00364363	0.00861476
BRPF1	5.38939	8.80647	0.60471	0.00366544	0.00866091
TRIM32	4.1662	6.81946	0.612652	0.00374564	0.00882968
LSM14A	65.9219	106.079	0.596932	0.00376708	0.00887191
CSNK2A1	30.3737	49.3799	0.599171	0.00380921	0.00896275
CELF1	26.0954	42.0659	0.596269	0.00381888	0.0089827
DPY19L3	3.94193	6.422	0.607057	0.00382058	0.00898529
TNFRSF10A	4.86244	8.07471	0.623164	0.00384129	0.00902978
GSR	22.9863	37.0777	0.597146	0.0038965	0.00914818
INTS3	12.226	19.7599	0.596184	0.00391629	0.00918465
POLR3A	3.82612	6.22956	0.599716	0.0039337	0.00922192
ZCCHC11	6.76551	10.9476	0.598658	0.00393826	0.00923042
CLASP2	8.30036	13.4191	0.596381	0.00398605	0.00933375
INTS7	7.4343	12.0205	0.599099	0.00399282	0.00934627
POLR3C	9.43074	15.2462	0.596478	0.00399943	0.00935927
PTPN9	8.45971	13.7323	0.597488	0.00404952	0.00946917
MRTO4	35.0682	56.4403	0.59373	0.00405862	0.00948748
PIP4K2B	9.40943	15.3062	0.593625	0.0041539	0.00968773
THRAP3	43.7142	70.0712	0.589958	0.0041776	0.00973698
ELAVL1	20.7041	33.1789	0.588794	0.00427735	0.00995257
ZNF136	2.94978	4.84176	0.611608	0.00432998	0.0100595
GNL3	108.552	173.434	0.587753	0.00433173	0.0100621
ISG20L2	19.3397	31.153	0.590791	0.00433301	0.0100635
DLAT	15.7487	25.232	0.589877	0.00434606	0.0100922
HNRNPR	40.0939	63.7794	0.586398	0.00438296	0.0101623
POLR2M	11.5673	18.6241	0.590437	0.00439532	0.0101874
FIP1L1	26.9111	43.1842	0.588164	0.00439582	0.0101874
MTFMT	5.79052	9.40547	0.599791	0.00443952	0.0102792
FAM168B	16.7452	26.9563	0.586022	0.00454734	0.0105047
ANLN	8.28022	13.2957	0.589874	0.00457041	0.0105516
C8orf82	3.99873	6.54763	0.60729	0.00470208	0.0108208
PRMT7	8.24935	13.2842	0.584966	0.00475552	0.0109355
PDSS1	9.97202	16.0181	0.588457	0.00485993	0.0111501
IQCC	2.44644	4.03104	0.611227	0.00505861	0.0115515

## Sheet: C
Table S5C. List of differentially expressed genes in sBL
Gene	Expr_mean(EBV–)	Expr_mean(EBV+)	logFC	PValue	FDR
NMU	0.161023	69.6419	8.61267	0	0
ACTL8	0.585662	130.126	7.75315	0	0
AZGP1	0.287385	11.3056	5.15567	1.47531e-177	4.34923e-174
XIST	1.76754	26.8747	3.87798	4.06961e-159	9.99768e-156
SOX11	9.03116	0.0165993	-9.34813	5.30544e-124	7.82022e-121
CREB5	0.526689	4.81408	3.13037	1.52038e-92	1.60074e-89
PNMAL1	14.1053	0.182109	-6.32868	6.77881e-90	5.55109e-87
NSG1	20.6566	0.264378	-6.383	8.87718e-90	6.88682e-87
CUX2	4.14757	0.0360761	-7.08314	1.57642e-86	1.16182e-83
NLRP7	5.50312	0.0168012	-8.52743	3.75193e-84	2.6335e-81
HOPX	1.95511	16.8736	3.02576	6.94548e-79	4.26568e-76
ABHD12B	8.67702	0.0327905	-8.14401	1.01012e-77	5.7266e-75
CLCF1	0.707496	6.35082	3.16594	1.63029e-73	8.2864e-71
LOC101448202	13.9451	0.0776231	-7.55252	5.30507e-72	2.52248e-69
FAM3B	14.1436	0.223779	-6.28232	1.55408e-70	7.15848e-68
NUDT11	6.46119	0.0878041	-6.33744	6.371e-70	2.76202e-67
PITPNM2	12.5443	0.56321	-4.55147	2.03253e-65	7.88409e-63
PHYHD1	16.7746	0.619532	-4.86607	2.25378e-63	8.30518e-61
RAB15	13.9261	0.636675	-4.47145	3.16562e-62	1.11098e-59
MGST1	49.9614	2.27414	-4.43603	3.38972e-62	1.16197e-59
ELK2AP	4.3958	28.246	2.73982	6.79255e-61	2.17657e-58
FCRL5	24.9429	1.48917	-4.12325	6.8391e-59	2.05731e-56
GZMH	2.18619	14.3946	2.6311	1.1652e-55	2.81559e-53
DMD	6.07891	0.331123	-4.23833	9.89218e-55	2.31446e-52
AMN	5.01105	0.0948921	-5.85922	3.38593e-54	7.79822e-52
CBS	10.8417	57.1557	2.38026	5.20677e-54	1.18074e-51
PSMA8	2.04201	11.7194	2.52255	4.64473e-52	9.64272e-50
HBEGF	32.0275	2.37134	-3.80469	9.85185e-52	1.96238e-49
DIP2C	9.02875	0.696889	-3.73697	1.70395e-50	3.22003e-48
CDK20	4.40109	0.180232	-4.77039	4.04442e-50	7.27009e-48
CPXM1	11.6982	0.798206	-3.892	1.66998e-49	2.93042e-47
IRF4	29.5239	2.50509	-3.59604	3.85312e-49	6.52815e-47
AK4	1.54324	7.84873	2.3033	4.88585e-49	8.09185e-47
SALL2	9.09753	0.595113	-3.87048	1.05662e-48	1.73051e-46
CPNE2	43.861	3.69012	-3.58631	1.28135e-48	2.07551e-46
C11orf85	5.50978	0.123794	-5.67513	1.06903e-47	1.65868e-45
APCDD1	0.859674	5.00147	2.4073	1.42003e-47	2.18033e-45
OVGP1	13.4509	1.05186	-3.71083	2.50418e-47	3.7665e-45
HHIP-AS1	4.59341	0.0879017	-5.55873	3.80378e-47	5.6634e-45
CELSR1	7.124	0.626819	-3.54517	5.6121e-47	8.20576e-45
SH2D1A	3.36905	16.5444	2.27479	7.31429e-47	1.05699e-44
HLA-DQA2	19.8531	94.9987	2.24026	9.54844e-46	1.29123e-43
CDC42BPB	9.66335	0.92184	-3.42006	9.26911e-45	1.21988e-42
LMF1	14.8549	1.29086	-3.59261	1.11703e-44	1.45708e-42
CHIT1	7.72717	35.3327	2.18198	1.29562e-44	1.67521e-42
CLIP4	1.60295	7.74302	2.26129	7.17077e-44	9.03394e-42
CABLES1	5.0744	0.442602	-3.56763	2.6569e-42	3.15828e-40
OPN3	6.06755	0.497609	-3.59257	4.23312e-42	4.9917e-40
BTNL9	26.8436	3.01216	-3.18206	6.67434e-41	7.5099e-39
CPNE7	1.20941	6.0117	2.28314	8.47754e-41	9.46658e-39
CRHBP	9.24234	0.833607	-3.50192	1.09159e-40	1.20978e-38
C8orf88	10.5479	0.804873	-3.90523	1.42489e-40	1.55577e-38
LOC283683	4.92801	0.296481	-4.33172	1.76208e-39	1.89584e-37
CCDC85C	4.31044	0.447849	-3.35862	2.35578e-39	2.51625e-37
C16orf74	11.8914	0.945141	-3.75421	2.83056e-39	3.00161e-37
SPINK2	2.9837	14.6959	2.36075	3.65327e-39	3.84638e-37
CHML	4.6821	0.540712	-3.14188	3.1359e-38	3.041e-36
USP30-AS1	2.19541	10.8342	2.25971	3.19418e-38	3.07727e-36
ZNF385B	35.0807	4.42006	-2.97554	5.85685e-38	5.49872e-36
NAPSA	26.8686	3.17609	-3.10432	1.05794e-37	9.74627e-36
DNAJA4	15.746	1.92865	-3.08934	1.70273e-37	1.54928e-35
PDE9A	6.84579	0.621989	-3.55499	2.3125e-37	2.09118e-35
FABP6	5.56894	0.145645	-5.21639	9.45183e-37	8.29285e-35
C14orf132	4.39888	0.377043	-3.60946	1.51995e-36	1.31789e-34
C15orf48	2.27908	11.1736	2.19032	1.9195e-36	1.64496e-34
PRICKLE1	5.8374	0.703676	-3.11134	3.77113e-36	3.19462e-34
CLU	7.31006	29.1711	2.00744	5.90417e-36	4.91681e-34
GAMT	9.13974	37.5663	2.0199	1.4244e-35	1.17294e-33
DBN1	30.7124	4.25635	-2.88671	2.1757e-35	1.78166e-33
CNR1	6.22418	0.828538	-2.89235	2.63845e-34	2.02556e-32
NIPSNAP3B	4.39129	0.491781	-3.30936	3.85002e-32	2.66429e-30
LOC283070	11.471	1.66927	-2.85289	4.38303e-32	3.01896e-30
PHACTR1	6.70346	0.917868	-2.90734	5.9422e-32	4.03632e-30
ZNF256	4.87338	0.606877	-3.1335	2.0238e-31	1.33173e-29
AQP3	14.5232	2.18817	-2.82072	2.84094e-31	1.84473e-29
HES6	6.01773	0.705547	-3.18571	3.2415e-31	2.0956e-29
NUP62CL	2.1777	8.779	1.94235	3.48308e-31	2.24195e-29
MYH11	4.59915	0.714827	-2.73879	5.63622e-31	3.56558e-29
MX2	18.9459	3.04633	-2.67356	6.87656e-31	4.33165e-29
DNMT3A	12.4438	1.97798	-2.70693	7.98673e-31	5.00955e-29
OASL	1.00098	4.3555	2.04701	9.76073e-31	6.04509e-29
SARDH	4.97226	0.710515	-2.85208	1.16637e-30	7.19344e-29
NEK3	11.1698	1.76998	-2.69792	5.42042e-30	3.2347e-28
SUGCT	6.43524	23.5374	1.90966	8.16993e-30	4.83633e-28
KLRC4	6.28533	0.667127	-3.0625	2.11076e-29	1.2232e-27
HLA-DRB4	70.625	248.363	1.76287	1.81669e-28	1.0379e-26
LAMP3	1.45311	5.34273	1.87629	2.15893e-28	1.22867e-26
PDLIM1	178.218	33.7232	-2.44148	3.35301e-28	1.87922e-26
PGBD1	4.21175	0.669524	-2.73226	1.03158e-27	5.63166e-26
KLHL14	10.5079	1.93241	-2.48694	1.0995e-27	5.9583e-26
PALLD	4.30618	14.6994	1.75168	1.69064e-27	9.09491e-26
TEAD2	10.6024	1.82314	-2.58009	1.85805e-27	9.95915e-26
ZNF518B	4.41804	0.79385	-2.53374	2.28942e-27	1.21827e-25
ADARB1	14.3745	2.7216	-2.44128	3.60252e-27	1.88972e-25
RUNX2	4.54481	0.814952	-2.51746	5.69907e-27	2.96835e-25
CD24	251.163	51.6137	-2.31588	4.39438e-26	2.1957e-24
NCALD	1.54681	5.40074	1.76735	6.33534e-26	3.13366e-24
PIANP	5.55442	0.973605	-2.57276	7.94107e-26	3.86308e-24
ZCWPW1	2.98409	10.2851	1.75899	8.19118e-26	3.97164e-24
CMPK2	2.34551	8.08138	1.75361	1.3136e-25	6.32759e-24
IFI44	3.77196	12.6994	1.73122	2.37459e-25	1.12908e-23
PRR34-AS1	1.54919	5.75936	1.87226	2.47387e-25	1.1725e-23
MTCL1	10.6008	2.16559	-2.32131	2.5758e-25	1.2169e-23
HDGFRP3	9.40844	1.83612	-2.40462	4.35391e-25	2.0245e-23
PTPRS	5.99304	1.19225	-2.38745	4.67647e-25	2.16085e-23
B3GALTL	2.32561	7.68792	1.70682	6.25837e-25	2.85599e-23
LOC100101478	7.48127	1.2077	-2.74892	1.85922e-24	8.22969e-23
ZNF512B	4.19003	0.857793	-2.37458	6.20857e-24	2.69954e-22
FAM43A	5.22355	1.02884	-2.37693	8.78899e-24	3.788e-22
LOC101928710	5.68259	1.08518	-2.3787	2.87545e-23	1.21097e-21
GAS6-AS1	4.9475	0.666592	-2.73606	2.88726e-23	1.21249e-21
PODXL	3.85299	11.8389	1.59661	4.74446e-23	1.96995e-21
GSTO2	2.45534	7.8619	1.82748	7.28359e-23	2.99889e-21
LYSMD2	8.77221	27.4152	1.6246	1.72165e-22	6.99094e-21
SH3YL1	15.0467	3.37776	-2.18901	2.02569e-22	8.18044e-21
C3orf14	5.50819	1.20623	-2.29536	4.09416e-22	1.63989e-20
CR2	5.66657	16.9301	1.57593	4.95542e-22	1.97413e-20
SLC7A3	6.74525	1.45817	-2.25986	6.26346e-22	2.48181e-20
S100Z	9.38448	1.96754	-2.28564	2.38204e-21	9.07269e-20
FNBP1	9.83397	28.6291	1.52624	3.01468e-21	1.13648e-19
MX1	31.6639	7.81945	-2.03668	5.89505e-21	2.17233e-19
LOC100506844	31.6136	93.2085	1.53728	5.97954e-21	2.19796e-19
C5orf63	7.79333	1.72199	-2.16641	7.18331e-21	2.63388e-19
HDAC9	15.8763	3.9883	-2.01926	8.20974e-21	2.98794e-19
CBFA2T3	27.5391	7.04008	-1.9961	1.40439e-20	5.07605e-19
LEF1	63.6894	16.3206	-1.99593	1.40504e-20	5.07605e-19
PTMS	12.2106	35.8337	1.53228	1.46414e-20	5.27662e-19
C3orf52	11.047	2.63734	-2.10899	1.68479e-20	6.02763e-19
PPP1R14C	1.4401	4.60044	1.62785	2.78223e-20	9.88195e-19
SVIP	6.26057	1.36312	-2.29438	4.71115e-20	1.64555e-18
EML6	25.6874	6.71765	-1.95382	5.4651e-20	1.89097e-18
CLECL1	32.5511	8.15175	-2.02384	1.36004e-19	4.54579e-18
CRIM1	4.48029	1.13696	-2.00333	2.00412e-19	6.65331e-18
PHYH	13.2329	3.30561	-2.03997	2.11782e-19	6.99924e-18
TRAM2	7.52425	1.97512	-1.94805	2.2431e-19	7.39673e-18
BFSP2	2.40096	7.32299	1.5787	3.29647e-19	1.07738e-17
FAM89A	4.52914	0.986687	-2.22329	5.71553e-19	1.83945e-17
NUDT7	9.91203	28.3971	1.49704	6.97145e-19	2.22905e-17
HOMER3	4.93683	1.10677	-2.22271	1.20874e-18	3.84814e-17
PTK7	4.57153	1.16762	-2.02029	1.22092e-18	3.87854e-17
VPS37B	5.61574	1.43408	-2.02721	1.43973e-18	4.554e-17
RAB33A	2.30258	6.95864	1.60083	1.86234e-18	5.80356e-17
FAM26F	17.1491	48.2363	1.47576	1.89723e-18	5.89983e-17
SH3BP5	19.4451	5.43335	-1.87132	2.12457e-18	6.57903e-17
ZDHHC8	4.65729	1.24265	-1.95687	2.63215e-18	8.11673e-17
AUTS2	12.4847	3.47009	-1.86598	3.72223e-18	1.1266e-16
LAX1	6.94504	1.86378	-1.91906	4.32373e-18	1.30065e-16
ASAP3	2.2739	6.31906	1.46034	4.33798e-18	1.30228e-16
PRKCA	6.59434	1.86056	-1.8355	5.41694e-18	1.61631e-16
BEX2	5.19322	1.05462	-2.37643	6.30067e-18	1.8649e-16
NAP1L5	5.11766	1.28657	-2.0454	7.17681e-18	2.11996e-16
HIST1H2BK	20.5192	55.906	1.42094	9.1246e-18	2.67922e-16
SNTB1	7.65653	2.13274	-1.85112	9.59325e-18	2.80564e-16
RNF2	9.61365	2.70462	-1.85261	1.30138e-17	3.76125e-16
PFN2	9.9662	2.70255	-1.94673	1.39537e-17	4.00932e-16
PCDH9	4.8692	1.36432	-1.85233	1.85422e-17	5.26612e-16
C9orf64	4.72504	1.26243	-1.95035	4.26074e-17	1.18946e-15
RNF19B	14.2985	37.234	1.37305	4.30757e-17	1.20026e-15
HRK	7.18551	1.91148	-1.98772	4.65086e-17	1.29059e-15
CHST15	14.5115	4.28492	-1.78517	5.15525e-17	1.423e-15
LIMD1	4.9385	1.43243	-1.82119	6.40479e-17	1.75477e-15
WFS1	5.31961	1.49457	-1.87252	7.00896e-17	1.90965e-15
CCDC74A	7.89375	2.10387	-1.97859	7.11214e-17	1.93419e-15
BMP3	10.0213	2.99995	-1.74608	7.55257e-17	2.05018e-15
HK1	22.4097	6.73378	-1.75912	9.37205e-17	2.51629e-15
CAMK1D	4.71362	1.37551	-1.81515	1.12223e-16	3.00212e-15
ANKS6	4.95959	1.46453	-1.80634	1.22336e-16	3.24322e-15
GPX7	29.0175	8.59045	-1.77523	1.27988e-16	3.38697e-15
SYT11	17.0163	5.15542	-1.74159	1.45457e-16	3.84235e-15
CREB3L2	9.91054	2.96844	-1.76297	1.54796e-16	4.08173e-15
RPP25	10.5219	3.0877	-1.84353	2.31366e-16	6.0467e-15
CCR5	3.1248	8.23685	1.36734	2.39645e-16	6.25196e-15
FAN1	7.59579	2.30367	-1.74665	3.96186e-16	1.01209e-14
CRIP3	1.96824	5.73896	1.62041	4.3689e-16	1.10839e-14
PDE4B	9.98214	3.03303	-1.74781	4.50189e-16	1.14017e-14
ACSF2	13.0904	34.1109	1.36084	5.21011e-16	1.31502e-14
CD8B	3.63349	9.99465	1.41984	5.27018e-16	1.32791e-14
H19	12.923	3.93859	-1.74134	8.06985e-16	2.01268e-14
RELL2	6.64664	1.96206	-1.78061	1.01496e-15	2.51016e-14
KCNMB3	9.29393	2.69006	-1.84943	1.21012e-15	2.9878e-14
PARP3	4.07382	10.5297	1.36009	1.41435e-15	3.46304e-14
C4orf32	17.6283	44.0618	1.30405	1.61328e-15	3.93705e-14
PACS1	9.90501	24.7797	1.30656	1.67294e-15	4.07588e-14
CKAP4	20.0089	6.39616	-1.67844	1.86421e-15	4.5344e-14
STK33	4.61651	12.0035	1.33685	2.12676e-15	5.14754e-14
CIDEB	4.11822	1.17164	-1.87246	2.37573e-15	5.74069e-14
S1PR3	4.7932	1.47264	-1.72634	2.84682e-15	6.83422e-14
GOLGA8B	44.2084	14.4221	-1.64476	3.16835e-15	7.58141e-14
HIST2H2AA3	1.28817	4.43966	1.79288	3.2185e-15	7.67648e-14
HIST2H2AA4	1.28817	4.43966	1.79288	3.2185e-15	7.67648e-14
CD3E	13.7822	34.4823	1.31153	3.80535e-15	9.04692e-14
IFI35	6.91988	17.6487	1.33465	6.21012e-15	1.45297e-13
EIF1AY	66.4785	22.1871	-1.61936	9.58286e-15	2.21397e-13
RASA3	10.2826	3.35209	-1.65508	9.91498e-15	2.28712e-13
LINC00487	4.53753	11.3872	1.31578	1.15834e-14	2.65536e-13
GABBR1	10.4083	3.40848	-1.63497	1.22889e-14	2.80834e-13
PARP15	5.95727	1.83303	-1.75259	1.2691e-14	2.88714e-13
SNTA1	13.2772	4.29193	-1.67441	1.27383e-14	2.89311e-13
AFF1	6.6924	2.22816	-1.61279	1.28218e-14	2.90758e-13
BANK1	5.6671	14.0532	1.29048	1.35831e-14	3.06608e-13
KLRK1	63.7313	21.408	-1.6059	1.47319e-14	3.31019e-13
LINC01480	5.5221	1.13878	-2.33017	1.75851e-14	3.92735e-13
MARCO	2.05934	5.40421	1.32027	1.79093e-14	3.99369e-13
HCP5	11.1872	26.9902	1.26319	3.05594e-14	6.72307e-13
LOC730101	4.79546	1.53902	-1.6701	3.32111e-14	7.28469e-13
TERT	17.5832	6.04184	-1.57822	4.36266e-14	9.48459e-13
SERINC5	15.3135	5.2455	-1.57298	4.67249e-14	1.01283e-12
MTSS1	7.74248	2.59692	-1.58798	6.20382e-14	1.33107e-12
MYLIP	5.77462	13.942	1.2506	8.09504e-14	1.71932e-12
TNKS2-AS1	3.88786	11.0909	1.46046	8.49273e-14	1.7986e-12
TGIF1	17.317	5.84162	-1.60098	1.00558e-13	2.12659e-12
PARVG	9.66127	22.9873	1.23221	1.11743e-13	2.35636e-12
SERPINA9	3.12981	7.62795	1.25437	1.2603e-13	2.65383e-12
CD1C	7.05091	2.34268	-1.64021	1.26512e-13	2.66019e-12
EPSTI1	4.8883	11.5525	1.23196	2.03002e-13	4.24434e-12
HHEX	15.4834	5.36714	-1.56311	2.50909e-13	5.21636e-12
ZSCAN9	8.42605	2.82349	-1.60894	2.91937e-13	6.0184e-12
CHD2	18.898	6.80279	-1.49711	3.63547e-13	7.44261e-12
ZNF84	11.9907	4.33935	-1.4968	4.60233e-13	9.31846e-12
NCR3	2.31252	5.80392	1.41995	5.03366e-13	1.01629e-11
ARHGAP24	5.18768	1.81	-1.52143	7.72298e-13	1.53419e-11
SESN1	7.35197	17.158	1.19694	7.8382e-13	1.55289e-11
MGAT3	8.44836	3.05474	-1.4945	8.71758e-13	1.71283e-11
NSMF	13.7874	5.00406	-1.48862	8.79432e-13	1.72378e-11
NIPA1	13.6516	4.97608	-1.47627	8.93473e-13	1.74666e-11
CTH	1.79034	4.38167	1.27544	9.50733e-13	1.85123e-11
RAB4A	25.2767	9.28871	-1.4745	1.00416e-12	1.9501e-11
CCDC112	10.8261	3.88178	-1.49264	1.07265e-12	2.06948e-11
LAPTM4B	11.1574	3.975	-1.51402	1.39307e-12	2.66328e-11
ATP10D	3.07461	7.08435	1.18355	1.49853e-12	2.85748e-11
ENC1	7.54924	2.71449	-1.50687	1.53106e-12	2.90823e-11
MBNL3	9.25232	3.43105	-1.45538	1.59285e-12	3.01395e-11
ZNF514	5.33882	1.88057	-1.54509	1.76017e-12	3.32201e-11
TNFRSF21	10.0309	3.65378	-1.47303	1.97879e-12	3.72508e-11
GDF11	4.38124	1.57216	-1.53231	2.23605e-12	4.17207e-11
TSNARE1	4.42732	1.56065	-1.55467	2.51424e-12	4.65577e-11
NBPF3	2.96479	6.92031	1.18846	3.15288e-12	5.78028e-11
ZNF32	24.3066	8.98496	-1.47299	3.74565e-12	6.81616e-11
SPA17	4.88739	11.7829	1.24009	3.76999e-12	6.85199e-11
RASGRP3	13.8657	30.9004	1.14566	4.14015e-12	7.50626e-11
KIAA1586	6.46709	2.35861	-1.48134	4.59529e-12	8.29064e-11
ELOVL6	6.24536	2.26504	-1.47454	4.60346e-12	8.29523e-11
IL27RA	4.55365	1.61909	-1.52544	6.04757e-12	1.08181e-10
PNOC	28.133	10.4262	-1.45814	6.08657e-12	1.0874e-10
BEND3	5.32548	2.00885	-1.42683	7.42069e-12	1.32262e-10
UBE2L6	59.1412	131.715	1.13409	7.4694e-12	1.3297e-10
MEX3C	27.9377	10.7682	-1.3944	8.89845e-12	1.5727e-10
NMB	5.5145	1.78384	-1.67169	9.13718e-12	1.61103e-10
SERHL2	9.21828	3.36849	-1.46958	1.00169e-11	1.75772e-10
DENND1B	2.35387	5.32049	1.14545	1.0088e-11	1.7681e-10
USP12	12.9405	28.57	1.11854	1.53293e-11	2.63191e-10
INSR	10.377	4.05606	-1.38507	1.53379e-11	2.63191e-10
ARHGAP17	48.1711	18.8267	-1.37662	1.59618e-11	2.73579e-10
FUT8	17.814	6.95845	-1.37583	1.70066e-11	2.89801e-10
PPP2R3B	49.3921	19.4788	-1.3762	1.77088e-11	3.00723e-10
MOB1B	8.42589	18.6024	1.11443	1.7753e-11	3.01127e-10
FAM65A	5.90586	2.24978	-1.40907	2.69563e-11	4.51518e-10
DGAT2	2.40525	5.51075	1.16739	2.76484e-11	4.6206e-10
SPTBN1	22.1444	8.80652	-1.35457	2.7725e-11	4.62816e-10
KLHL9	8.37024	3.26802	-1.38038	3.19049e-11	5.30788e-10
KIAA1147	7.40398	2.93418	-1.36114	3.33263e-11	5.51943e-10
FLVCR1-AS1	5.50009	12.6736	1.1556	3.48413e-11	5.75741e-10
CLEC4E	3.35718	7.60901	1.15466	3.78778e-11	6.23123e-10
GTF2H2B	10.982	4.37333	-1.354	4.19713e-11	6.88927e-10
LY96	11.6494	26.3252	1.15893	4.77639e-11	7.78806e-10
CPOX	10.4067	4.11035	-1.37618	6.13279e-11	9.90113e-10
ISG20	33.3658	72.49	1.09101	6.14114e-11	9.90377e-10
PITPNC1	8.81126	3.5506	-1.34362	6.54549e-11	1.04984e-09
CPT1A	17.3567	7.02175	-1.32874	8.02563e-11	1.27065e-09
GCHFR	32.1584	69.5375	1.09209	8.55457e-11	1.34572e-09
ZNF331	11.5265	4.67012	-1.33003	8.88041e-11	1.39401e-09
SMIM4	8.53955	19.6552	1.17891	9.69597e-11	1.51718e-09
LST1	8.54172	19.0792	1.15039	1.01681e-10	1.58768e-09
LZTFL1	6.807	2.72015	-1.34788	1.19344e-10	1.84395e-09
PJA1	8.36986	3.30904	-1.352	1.23427e-10	1.90304e-09
BEX4	13.0192	5.11713	-1.39368	1.43229e-10	2.19459e-09
CD1D	7.17623	2.90833	-1.34031	1.61143e-10	2.46395e-09
SERPINB9	41.2395	17.0226	-1.29234	1.74028e-10	2.65546e-09
HSD17B8	8.273	18.1542	1.12566	2.00378e-10	3.03866e-09
IGF2BP1	19.6609	8.17058	-1.29153	2.06686e-10	3.12787e-09
CEACAM21	5.30851	1.98867	-1.46801	2.16962e-10	3.28001e-09
TP73-AS1	8.96138	3.70036	-1.30325	2.30858e-10	3.47584e-09
MYB	34.989	14.6582	-1.28627	2.4113e-10	3.60838e-09
STK38L	6.45241	2.65977	-1.30111	2.91099e-10	4.31237e-09
SUOX	1.83827	4.08931	1.13144	3.57127e-10	5.26933e-09
2017-09-11	20.6719	8.73635	-1.27062	3.73307e-10	5.49157e-09
SQRDL	9.80622	20.7087	1.06632	3.80175e-10	5.58702e-09
LOC102724323	4.66335	1.33477	-1.71347	3.97126e-10	5.83032e-09
MBOAT2	3.35812	7.18206	1.06325	3.99353e-10	5.85135e-09
KCNN4	13.8068	5.72481	-1.28872	4.03326e-10	5.9037e-09
WWC3	8.3552	3.50312	-1.27326	4.28989e-10	6.2545e-09
ABRACL	74.3927	31.4464	-1.2651	4.54711e-10	6.6099e-09
IRF5	10.5944	4.43215	-1.28908	6.49775e-10	9.32589e-09
SEC14L1	43.5451	89.6459	1.02457	6.73791e-10	9.65177e-09
FADS3	61.9092	26.4632	-1.24526	7.518e-10	1.07275e-08
SETD1B	4.05258	1.71023	-1.26904	7.70163e-10	1.09683e-08
HVCN1	45.2739	19.4324	-1.24479	8.10856e-10	1.15145e-08
ARHGEF12	5.0852	2.17585	-1.24542	9.51057e-10	1.34021e-08
FCRL2	74.9643	32.6301	-1.23507	9.8969e-10	1.39199e-08
RHBDD1	13.5199	5.81062	-1.23915	1.00406e-09	1.40951e-08
MGLL	8.13727	3.44849	-1.26034	1.09443e-09	1.53345e-08
SLC18B1	9.35358	3.92614	-1.26506	1.1015e-09	1.54043e-08
SNN	17.1979	7.39161	-1.23618	1.12317e-09	1.56776e-08
PNKD	45.918	94.4278	1.0207	1.12431e-09	1.56786e-08
SYCE2	1.6948	4.09775	1.20493	1.21264e-09	1.67992e-08
HEBP2	32.0918	13.8601	-1.23353	1.21825e-09	1.68611e-08
TJP2	11.5625	23.8514	1.01392	1.2602e-09	1.7409e-08
SCO2	2.29192	5.10754	1.1796	1.30729e-09	1.80128e-08
PSMB9	56.6609	116.756	1.0141	1.49649e-09	2.05384e-08
ASB13	14.7974	30.1805	1.00967	2.02225e-09	2.72721e-08
LRFN4	5.83873	2.45931	-1.28278	2.02413e-09	2.72721e-08
ANTXRLP1	5.39506	2.10882	-1.34316	2.41389e-09	3.23167e-08
HDHD1	18.1725	36.8657	1.0005	2.80178e-09	3.72392e-08
PPFIBP2	14.4625	6.37615	-1.21128	2.98189e-09	3.94906e-08
SPN	9.34203	4.12341	-1.20645	3.23662e-09	4.27107e-08
CCDC50	8.24065	3.65555	-1.1906	3.4282e-09	4.50371e-08
DGKA	43.3987	19.3672	-1.19039	3.57679e-09	4.69056e-08
PCK2	8.74968	17.8286	1.00505	3.73916e-09	4.89044e-08
DDX3Y	34.0716	15.2693	-1.18927	3.81705e-09	4.98347e-08
NRGN	7.58344	15.5938	1.02716	4.14291e-09	5.39456e-08
EFHC1	4.1492	1.80991	-1.22319	4.29567e-09	5.57378e-08
METRNL	4.41133	9.24175	1.03558	4.7128e-09	6.06166e-08
BEND4	7.2681	3.25427	-1.18571	5.16635e-09	6.60469e-08
IL12RB1	6.25153	12.707	1.00065	5.49443e-09	7.01194e-08
PROCA1	7.43534	3.15209	-1.27886	5.57125e-09	7.09768e-08
CNR2	6.58245	2.80788	-1.24653	6.09576e-09	7.73249e-08
FAM228B	4.77446	10.0574	1.05464	6.53259e-09	8.25818e-08
IQSEC1	16.1719	7.32418	-1.16851	6.58888e-09	8.3222e-08
CSNK1G3	8.02492	3.60172	-1.18229	7.05324e-09	8.87828e-08
SESN2	3.27478	6.63543	0.994915	7.8338e-09	9.78561e-08
C5orf30	9.74406	4.36368	-1.17909	7.90993e-09	9.86399e-08
FAM129C	48.5466	22.243	-1.1592	8.04468e-09	1.00236e-07
FAM160B2	5.54001	2.45881	-1.19678	9.76098e-09	1.20198e-07
CCNE1	16.0542	7.20183	-1.17606	1.01609e-08	1.2481e-07
DDIT3	22.0734	44.086	0.972449	1.16468e-08	1.42114e-07
EMG1	62.6342	123.835	0.95792	1.23224e-08	1.50234e-07
TP53BP2	8.38572	3.8166	-1.15043	1.27478e-08	1.55291e-07
ACSS1	7.58809	15.042	0.965328	1.34003e-08	1.62836e-07
TNFSF9	6.21406	2.68683	-1.23582	1.37734e-08	1.66957e-07
LCK	110.918	51.4942	-1.13226	1.54341e-08	1.85562e-07
ETFB	41.5522	81.9819	0.95417	1.67599e-08	2.00358e-07
PIGY	39.1735	18.1866	-1.13559	1.79538e-08	2.13419e-07
MORC3	12.8624	5.96037	-1.12899	1.88685e-08	2.23212e-07
GALNT2	11.1141	5.1286	-1.13729	1.91371e-08	2.26208e-07
LOC339803	5.08138	10.1394	0.970109	2.08013e-08	2.45289e-07
ABHD15	6.76236	3.08893	-1.16142	2.21808e-08	2.60929e-07
PLEKHG1	8.87937	4.11727	-1.12324	2.28065e-08	2.67863e-07
DYRK3	7.54489	3.41831	-1.16113	2.36341e-08	2.7692e-07
LRRC23	8.57984	3.85215	-1.1883	2.63014e-08	3.05743e-07
KLRG1	4.17292	8.43069	0.985651	2.6349e-08	3.06056e-07
XYLT1	5.58887	2.60389	-1.12413	2.64249e-08	3.06695e-07
C4orf27	30.1213	14.0783	-1.1309	2.64771e-08	3.0706e-07
APBB2	13.3817	6.28359	-1.11381	2.65567e-08	3.0774e-07
OR13A1	18.472	8.64246	-1.12108	2.80957e-08	3.23792e-07
GNPDA1	18.9514	8.83913	-1.11485	2.82839e-08	3.25707e-07
CORO1B	12.5068	5.73081	-1.14607	2.92295e-08	3.35286e-07
MED25	14.0505	6.53833	-1.1216	3.09121e-08	3.54036e-07
IFI6	7.61368	15.0457	0.972602	3.13432e-08	3.58417e-07
SLC43A1	23.9826	46.6807	0.932503	3.23926e-08	3.69342e-07
ZNF117	6.73549	3.17878	-1.10522	4.25908e-08	4.7668e-07
CDYL	9.1944	4.29323	-1.11468	4.26671e-08	4.76924e-07
NUCB2	25.4041	49.0742	0.923979	4.27097e-08	4.76924e-07
IRF2BP2	15.0483	7.15584	-1.10189	4.27657e-08	4.77189e-07
PDGFD	3.39265	6.62889	0.935367	4.63204e-08	5.14516e-07
SIT1	82.8635	39.4579	-1.09459	4.71115e-08	5.2291e-07
IER5	15.8854	7.5734	-1.10514	5.28281e-08	5.81977e-07
MAP3K13	11.3048	5.29868	-1.13342	5.33996e-08	5.87835e-07
KMO	10.2584	4.91152	-1.0927	5.88939e-08	6.45905e-07
GPLD1	6.53622	3.09443	-1.0919	5.96835e-08	6.53592e-07
CDK18	2.5716	5.03762	0.947539	6.57644e-08	7.18583e-07
HLA-DPB1	72.0833	137.407	0.904876	6.6244e-08	7.23286e-07
ARHGAP18	2.59873	5.08466	0.943332	6.63029e-08	7.23394e-07
PTOV1-AS1	18.9429	9.08915	-1.08694	7.37656e-08	8.01847e-07
VNN2	33.6989	63.8193	0.90245	8.58211e-08	9.26063e-07
INTS1	20.8873	10.1595	-1.0656	8.7224e-08	9.40514e-07
FAM118A	24.8127	12.0099	-1.07339	8.75747e-08	9.42916e-07
RNGTT	31.9112	15.3974	-1.06793	8.8224e-08	9.49213e-07
RIMKLB	54.0105	26.3989	-1.06557	9.36179e-08	1.00431e-06
ABLIM1	33.902	16.5189	-1.06217	9.39264e-08	1.00689e-06
DENND2D	14.6875	27.9023	0.903181	9.54754e-08	1.02053e-06
PSRC1	14.0377	26.8446	0.908061	1.02257e-07	1.08907e-06
MANEAL	6.96639	13.4178	0.920034	1.02903e-07	1.09501e-06
MPC2	28.4822	54.3538	0.899202	1.08133e-07	1.14833e-06
LRWD1	10.3175	4.92655	-1.07927	1.30381e-07	1.37273e-06
CYTIP	22.8277	42.9733	0.891157	1.31976e-07	1.38754e-06
NT5C3B	16.1344	30.5	0.894246	1.57574e-07	1.64726e-06
LOC100505622	3.49095	7.15686	1.02135	1.59898e-07	1.668e-06
NT5DC1	9.10787	4.44035	-1.06226	1.88671e-07	1.94613e-06
FABP3	7.03433	13.558	0.915417	1.91782e-07	1.97683e-06
PIK3C2B	15.6348	7.7672	-1.03452	2.05274e-07	2.11295e-06
SEPN1	8.15286	3.99839	-1.05195	2.16778e-07	2.22359e-06
HLA-DOA	27.8677	51.4965	0.872448	2.20897e-07	2.2627e-06
ACBD4	2.54667	4.99396	0.942389	2.29472e-07	2.34727e-06
EPHB4	3.28059	6.21214	0.893886	2.36185e-07	2.41426e-06
JARID2	4.86732	2.38893	-1.04788	2.4082e-07	2.45993e-06
SLC37A3	4.00791	1.90898	-1.08282	2.42952e-07	2.47999e-06
HSPA1B	39.2871	73.7587	0.867549	2.58415e-07	2.62511e-06
MAD1L1	15.3594	7.60584	-1.03967	2.60456e-07	2.64402e-06
SLC39A10	5.61061	2.77837	-1.03728	2.91175e-07	2.9437e-06
CCDC91	13.6845	6.83013	-1.03035	3.16639e-07	3.18367e-06
MYBL1	24.1394	44.341	0.857802	3.36386e-07	3.36844e-06
EXTL2	5.8304	2.85259	-1.04034	3.37212e-07	3.37441e-06
BCL2L2	3.51122	6.56038	0.888692	3.43464e-07	3.43231e-06
MIR600HG	13.6225	6.83514	-1.01614	3.45154e-07	3.44687e-06
LDLR	3.25536	6.04973	0.87712	3.52008e-07	3.51293e-06
ZBED1	15.5468	7.84238	-1.01737	3.55466e-07	3.53786e-06
DNPH1	30.0388	56.0973	0.877945	3.72165e-07	3.6916e-06
TOP1MT	28.6255	14.4193	-1.0162	3.87113e-07	3.83729e-06
ZNF708	5.37981	2.66449	-1.05257	3.98167e-07	3.94421e-06
ANKRD13B	6.37891	3.15408	-1.04963	4.10595e-07	4.06186e-06
LOC100506123	51.3995	26.2501	-1.0045	4.14841e-07	4.10111e-06
NEAT1	98.1	179.339	0.849726	4.22583e-07	4.16647e-06
AACS	10.5946	5.2979	-1.01091	4.78101e-07	4.67012e-06
ZNF140	9.28987	4.68811	-1.01431	5.0598e-07	4.92937e-06
PPP1R2	32.0084	16.4329	-0.991016	5.62698e-07	5.44237e-06
SCO1	15.3344	28.1663	0.852259	6.23054e-07	5.99466e-06
WDTC1	5.39966	9.83877	0.847588	6.42973e-07	6.16218e-06
GNG2	12.2089	6.24829	-0.992265	6.63579e-07	6.34728e-06
GLCCI1	18.8899	9.70674	-0.983453	7.22464e-07	6.88372e-06
HLA-B	610.387	1108.57	0.832241	7.3944e-07	7.03184e-06
DANCR	350.065	182.521	-0.977462	7.48532e-07	7.11371e-06
ARL2BP	24.5668	44.4258	0.837387	7.99014e-07	7.53999e-06
CUX1	49.0954	25.255	-0.974645	8.0991e-07	7.62816e-06
BTG3	27.5083	50.1479	0.838123	8.97041e-07	8.39516e-06
ZMAT3	4.45667	2.28002	-0.982439	9.0891e-07	8.50084e-06
DENND4A	7.53159	13.6108	0.831611	9.11266e-07	8.51748e-06
SLC2A11	6.56856	12.0525	0.848408	9.52627e-07	8.89843e-06
GALM	3.5262	6.53419	0.859817	9.53324e-07	8.8993e-06
NBPF9	18.3871	9.51188	-0.968783	9.95692e-07	9.28305e-06
CCPG1	4.12831	7.49271	0.837354	1.03891e-06	9.65547e-06
TMEM263	24.7611	12.9544	-0.96755	1.09251e-06	1.01344e-05
PRPSAP2	35.6931	64.3336	0.824291	1.15093e-06	1.06352e-05
RELL1	10.5369	5.48875	-0.973111	1.15488e-06	1.06593e-05
CRTAP	8.27919	14.874	0.824829	1.18893e-06	1.09393e-05
SREBF1	3.13069	5.66749	0.839273	1.30785e-06	1.19425e-05
SIKE1	14.1368	7.39691	-0.956209	1.36659e-06	1.24113e-05
ZNF480	11.0004	5.74279	-0.965143	1.36882e-06	1.24239e-05
CRTC3	4.01946	2.06	-0.988878	1.4854e-06	1.33995e-05
HSD17B11	22.1585	11.5899	-0.959151	1.49353e-06	1.34563e-05
DENND3	4.50911	8.05524	0.824948	1.49456e-06	1.34574e-05
PTGR2	2.70856	5.0013	0.853481	1.57796e-06	1.41565e-05
SLCO3A1	6.0538	10.8168	0.816564	1.60624e-06	1.44015e-05
PLEKHG2	9.15201	4.79741	-0.950201	1.71464e-06	1.53453e-05
DFFB	7.7916	4.0487	-0.978714	1.73612e-06	1.55281e-05
PSMB8-AS1	41.1358	73.3789	0.808706	1.9352e-06	1.72564e-05
GTF2H5	4.9837	8.92021	0.814266	1.93686e-06	1.72607e-05
ARID5B	9.38548	4.96312	-0.944257	1.95694e-06	1.74187e-05
TRANK1	7.87236	13.8815	0.804104	1.9703e-06	1.75058e-05
ZNF137P	6.44038	3.33013	-0.991217	1.98402e-06	1.75959e-05
RNF187	31.4187	55.9055	0.804985	1.99864e-06	1.7715e-05
CORO1C	38.643	20.4257	-0.936897	2.05176e-06	1.8153e-05
MAN2A2	6.39062	3.38299	-0.948854	2.08693e-06	1.84421e-05
ZNF280D	12.1789	6.45186	-0.940087	2.10442e-06	1.85078e-05
SPRYD4	8.11814	14.5918	0.824919	2.16571e-06	1.90128e-05
RGS3	8.08603	14.5357	0.828435	2.17361e-06	1.90709e-05
RBMS1	12.4746	6.6063	-0.939526	2.23062e-06	1.95362e-05
SH3KBP1	26.9881	47.6124	0.797578	2.39482e-06	2.08873e-05
HCG27	8.63348	15.4938	0.815864	2.51741e-06	2.1866e-05
AMT	4.3696	7.89928	0.844823	2.59302e-06	2.24434e-05
UHRF1	83.4766	44.972	-0.917187	3.05243e-06	2.61282e-05
CCDC78	3.77561	6.88256	0.830042	3.07579e-06	2.63129e-05
NICN1	6.86878	12.1816	0.802949	3.25691e-06	2.77336e-05
IPO7	50.221	27.1188	-0.914362	3.26684e-06	2.78021e-05
CMIP	12.5583	6.71249	-0.924116	3.33799e-06	2.83259e-05
UNKL	4.55534	2.39196	-0.957558	3.60803e-06	3.04421e-05
ZNF362	6.32019	3.3485	-0.945642	3.80322e-06	3.20156e-05
TES	11.7617	6.30291	-0.931987	3.81484e-06	3.20952e-05
GNGT2	13.7045	24.3453	0.809859	3.89756e-06	3.26833e-05
NADK2	12.0055	21.1171	0.785403	3.89805e-06	3.26833e-05
ZNF268	4.62508	2.47765	-0.930402	4.41135e-06	3.67363e-05
IFNLR1	16.2032	8.77736	-0.905189	4.43302e-06	3.68752e-05
SSFA2	9.11161	4.90871	-0.91369	4.46544e-06	3.7082e-05
BLCAP	42.5473	73.8563	0.77857	4.48981e-06	3.72634e-05
LRRC8A	4.65309	2.47253	-0.928098	4.89597e-06	4.04522e-05
ALDH3A2	10.9216	19.0472	0.77844	4.93034e-06	4.07133e-05
AGGF1	16.2938	8.87841	-0.900853	5.2633e-06	4.31966e-05
RPS6KC1	4.73357	2.54518	-0.930019	5.55906e-06	4.55226e-05
NUDT16	5.07964	2.75412	-0.915086	5.9706e-06	4.87571e-05
SLC41A1	7.27701	12.6126	0.773867	6.03508e-06	4.92019e-05
HMMR	26.5175	45.9169	0.767106	6.11946e-06	4.97523e-05
OAS2	26.3638	45.4876	0.767652	6.16957e-06	5.0132e-05
CDKL1	2.96859	5.34343	0.814872	7.52104e-06	6.01846e-05
NCK1-AS1	5.24461	9.41238	0.822648	7.58581e-06	6.06122e-05
ADPRM	6.53401	11.5266	0.801261	7.76872e-06	6.19648e-05
GON4L	13.976	7.73728	-0.878758	7.86025e-06	6.26271e-05
HLA-DOB	54.3512	93.4382	0.760732	8.04447e-06	6.39911e-05
BBS2	7.11744	12.3468	0.769558	8.4557e-06	6.69371e-05
LINC00667	6.48553	3.54647	-0.89833	8.56014e-06	6.76912e-05
ZNF26	10.2245	5.64615	-0.883595	8.81444e-06	6.94414e-05
MTMR1	13.7236	7.57297	-0.882756	8.83411e-06	6.95282e-05
PDCD4-AS1	11.5605	6.32141	-0.888154	9.66655e-06	7.56691e-05
SLC25A16	11.3012	6.22855	-0.88638	9.99628e-06	7.80017e-05
AGO2	2.57795	4.50095	0.785315	1.00827e-05	7.86344e-05
MRPL17	16.3046	27.9969	0.7569	1.02191e-05	7.96138e-05
KLHL22	2.68701	4.69905	0.795027	1.02664e-05	7.98981e-05
NIPA2	46.2877	25.8558	-0.863965	1.06979e-05	8.29929e-05
UGDH	9.88846	5.47162	-0.874413	1.1212e-05	8.65713e-05
LSM11	5.27513	2.93159	-0.874926	1.13457e-05	8.7512e-05
INF2	9.58276	5.30482	-0.88428	1.15098e-05	8.86854e-05
SESN3	3.84044	6.60263	0.75219	1.15329e-05	8.88168e-05
BPNT1	30.9775	52.6357	0.745225	1.1545e-05	8.88635e-05
HLA-F	22.1948	37.6999	0.752124	1.21651e-05	9.33928e-05
ITGAL	18.5453	31.2955	0.740723	1.28284e-05	9.80255e-05
ABI3	13.742	23.4783	0.750279	1.30913e-05	9.99307e-05
CATSPER2	2.96596	5.2529	0.808128	1.30996e-05	9.99418e-05
GKAP1	6.60189	11.4742	0.759596	1.367e-05	0.000104025
SNX29P1	14.6544	7.98277	-0.884224	1.39346e-05	0.000105984
PARTICLE	2.35902	4.28462	0.824628	1.40424e-05	0.000106583
AGMAT	4.29475	2.34968	-0.910229	1.41464e-05	0.000107318
BST2	93.2903	157.821	0.736499	1.48571e-05	0.000112075
LRRC37BP1	7.247	12.3384	0.74239	1.49394e-05	0.000112581
SGPP1	29.2512	49.4887	0.735185	1.50912e-05	0.000113666
SH2D3C	19.7777	11.1252	-0.848795	1.61375e-05	0.00012099
HLA-DPA1	272.832	457.389	0.729737	1.64994e-05	0.000123452
MAP2K6	4.51386	2.41619	-0.915594	1.65102e-05	0.00012347
IFITM2	108.668	183.921	0.735798	1.68014e-05	0.000125394
ARL2	16.3787	28.033	0.756695	1.73739e-05	0.00012947
LINC00641	9.92535	5.5628	-0.859281	1.93665e-05	0.000143089
TERF2IP	69.1831	116.7	0.724907	1.99674e-05	0.000147086
LSS	9.19373	5.16162	-0.843858	2.00541e-05	0.000147651
ADAM19	28.0054	15.9661	-0.829731	2.19956e-05	0.000160981
PAN3-AS1	2.4392	4.23492	0.789929	2.21995e-05	0.000162312
RHBDF2	21.9955	12.5276	-0.834836	2.23595e-05	0.000163401
SPRYD3	6.93765	11.7023	0.737044	2.26691e-05	0.000165335
PTK2	12.4224	20.6984	0.721751	2.31203e-05	0.000168459
ST8SIA4	6.35312	3.63463	-0.831552	2.67074e-05	0.000191939
FBXL5	14.6556	24.4868	0.717397	2.73287e-05	0.000195788
C11orf24	25.6652	14.6713	-0.829725	2.73552e-05	0.000195831
KBTBD8	16.5364	27.5955	0.713552	2.8462e-05	0.000203458
N4BP2L1	3.70367	6.26566	0.74025	2.85352e-05	0.000203783
GGA1	37.0224	21.4065	-0.818741	2.93084e-05	0.000209001
SUMF2	51.8398	86.6193	0.710044	3.16052e-05	0.000223758
HGSNAT	6.48616	10.7771	0.712445	3.26963e-05	0.000230182
TET3	5.61517	3.24257	-0.815327	3.35558e-05	0.000235867
TSPAN3	26.9302	44.659	0.705537	3.43548e-05	0.000241138
PCED1A	14.8908	8.56351	-0.827263	3.58674e-05	0.0002508
LHFP	23.838	13.7884	-0.811996	3.66514e-05	0.000255433
COQ10A	13.2259	22.1094	0.721439	3.75306e-05	0.000260944
IVD	9.89935	16.4335	0.704041	4.06262e-05	0.000281009
PIGV	4.78014	7.9879	0.725828	4.09184e-05	0.000282632
APBB1IP	86.7881	50.8265	-0.797803	4.31961e-05	0.000296835
IFNAR2	36.7997	21.439	-0.799504	4.46907e-05	0.000306248
SNX29P2	17.2665	28.4737	0.700897	4.49851e-05	0.000308123
FAM195A	7.74651	13.1613	0.738551	4.5355e-05	0.000310368
HSPB11	63.3606	105.119	0.70214	4.53928e-05	0.000310482
CAPRIN2	7.58285	4.42168	-0.801763	4.69111e-05	0.000320124
BID	18.2933	10.6522	-0.804883	4.70297e-05	0.000320785
UGP2	69.353	113.594	0.689912	5.0209e-05	0.000340894
TMEM106C	62.8068	103.103	0.692364	5.05531e-05	0.000343072
GALT	6.97525	11.6896	0.725532	5.16855e-05	0.000350273
USB1	17.4815	10.1631	-0.797669	5.20862e-05	0.000352503
HSD17B6	3.18531	5.36276	0.734614	5.31983e-05	0.000359533
NUTM2A-AS1	4.61831	7.97512	0.746522	5.51373e-05	0.000371276
TPST2	16.488	27.1586	0.698111	5.55855e-05	0.000373953
PKI55	7.15373	4.17618	-0.803998	5.77383e-05	0.000386847
OCIAD2	73.9734	43.8115	-0.78752	5.98264e-05	0.00040011
LINC00909	6.59913	3.85521	-0.801713	6.31824e-05	0.000420265
TXNIP	52.2052	85.344	0.68216	6.32588e-05	0.000420584
D2HGDH	6.83254	11.3192	0.700058	6.38666e-05	0.000424051
AP1S3	11.146	6.58881	-0.787035	6.41896e-05	0.000425812
RRP8	11.8916	19.6052	0.695742	6.47542e-05	0.000428979
LINC01410	3.36417	5.53304	0.70885	6.58699e-05	0.000435587
SEC11C	61.5607	101.149	0.685197	6.60998e-05	0.000436911
SMAD5	9.86483	5.82839	-0.780393	6.65579e-05	0.000439348
TMEM106A	2.41193	4.00528	0.715022	6.73551e-05	0.000444411
GUSBP11	6.15369	3.5927	-0.800587	6.96461e-05	0.000458501
TPCN2	6.24217	3.66196	-0.787087	7.00047e-05	0.00046045
MCCC1	26.3378	42.9792	0.680426	7.06123e-05	0.000464033
HS2ST1	19.5743	11.6295	-0.769963	7.96397e-05	0.00051965
MTHFS	7.60912	12.4377	0.689302	8.28225e-05	0.000539224
NCF4	48.2627	28.9259	-0.769008	8.42181e-05	0.00054662
KIAA0226L	178.75	107.541	-0.76329	8.44647e-05	0.00054798
BCL6	48.2012	77.565	0.6694	8.50448e-05	0.000551501
TRIM14	15.0988	24.3944	0.671867	8.53251e-05	0.000552544
KIFAP3	11.4427	6.79123	-0.775239	8.56602e-05	0.000554028
IQCH-AS1	9.12834	15.1632	0.729802	8.86351e-05	0.000572015
APLP2	121.155	72.7713	-0.759493	9.20444e-05	0.000591686
B3GNTL1	2.77343	4.66753	0.751377	9.54997e-05	0.000612828
IFI30	196.333	314.549	0.663513	9.90386e-05	0.000632782
FAM134A	16.0657	25.8782	0.666436	0.00010139	0.000646686
ELL3	82.029	131.749	0.661592	0.000102903	0.000655487
CAPN10-AS1	4.60329	7.4902	0.682911	0.000103838	0.000660872
ZNF513	4.01652	2.31531	-0.815898	0.00010626	0.000674748
ZNF559	7.43493	4.41404	-0.779119	0.000106518	0.000675884
FCHSD1	7.76649	4.65286	-0.768454	0.000108334	0.000685929
PRDM15	45.9656	27.8166	-0.751508	0.000108507	0.000686138
STK39	18.673	30.0817	0.662124	0.000111026	0.000700867
CCDC122	3.38074	5.62566	0.68375	0.000111978	0.000705967
AP1B1	34.3841	20.6605	-0.749964	0.000115176	0.000724271
YOD1	6.41359	3.86281	-0.759659	0.000115331	0.00072494
ATG10	3.40126	5.58791	0.696143	0.000115984	0.000728729
ALPK1	4.89447	7.90614	0.664385	0.000117164	0.000735519
FLI1	28.1101	17.0527	-0.748798	0.000123329	0.000769955
MPZL3	3.17766	5.19061	0.683265	0.000124292	0.000774329
KLHL42	8.88659	5.38147	-0.750687	0.000125262	0.00077912
ZNF621	10.4426	6.28448	-0.754888	0.000125312	0.00077912
MAGEH1	8.74848	5.18253	-0.800075	0.000126573	0.000786212
ITGB1	48.4665	77.3251	0.652169	0.000131005	0.00081103
DPY30	64.6884	104.105	0.658214	0.000131594	0.000812949
DBNL	81.3384	129.724	0.650934	0.000137124	0.000844634
MYBL2	172.221	104.717	-0.737862	0.000140909	0.000866137
UCK2	17.6622	10.762	-0.741612	0.000141223	0.000867345
RNF122	11.3838	6.78847	-0.761708	0.000142304	0.000873618
PRKAR1B	14.1659	22.7033	0.65489	0.00014422	0.000884276
GIT1	15.0717	9.16089	-0.7387	0.000157004	0.000955507
VOPP1	69.2183	110.064	0.645003	0.000157539	0.000957587
NFYC-AS1	4.29783	6.95672	0.662231	0.000157541	0.000957587
BIRC3	33.1177	52.4409	0.644808	0.000159536	0.000968916
STX2	12.3787	7.52261	-0.740237	0.000160488	0.000974295
PRCP	29.2649	46.502	0.646251	0.000170631	0.0010312
QSOX2	29.3972	18.0507	-0.729072	0.000174022	0.00104826
ECHDC1	43.329	26.5617	-0.731703	0.000174357	0.00104984
ICAM3	29.1738	17.8764	-0.732991	0.000175215	0.00105415
GRK5	8.60132	5.19976	-0.750954	0.00017842	0.00106994
CIITA	15.2504	24.1755	0.644049	0.000179892	0.00107701
DNAJC1	5.82178	9.38952	0.659519	0.000181579	0.00108623
SLC50A1	18.9443	30.229	0.654262	0.000186876	0.00111385
ARPC5	107.629	170.887	0.63742	0.000188795	0.00112302
AMN1	6.53903	3.92355	-0.759553	0.000189083	0.00112428
CSRNP2	6.12934	3.72524	-0.735966	0.000192639	0.0011445
PLEKHA8	4.16413	6.62685	0.644145	0.000197276	0.00117016
SGK223	4.0238	2.43656	-0.752118	0.000208472	0.00123158
RNFT2	15.4963	9.5719	-0.726333	0.000212508	0.00125195
MRI1	11.7089	7.1755	-0.728512	0.00021448	0.00126255
DEPDC1	13.3358	21.0475	0.633984	0.000217036	0.00127658
ABR	23.841	37.331	0.63245	0.000217468	0.00127861
ZNF669	4.18035	2.46183	-0.779605	0.000220595	0.00129235
ITPR1	4.3292	2.66376	-0.723017	0.000222533	0.00130216
ZSCAN26	7.70048	4.67693	-0.739909	0.000223256	0.00130587
RAPGEF1	30.9829	19.1156	-0.713499	0.000231103	0.00134919
UBE2A	54.5885	85.7044	0.625705	0.000261629	0.00151291
HIBADH	14.9679	23.6083	0.632592	0.000263922	0.00152557
KMT2E-AS1	3.37356	5.39369	0.650734	0.000271105	0.00156403
LOC90784	9.2175	5.71321	-0.713824	0.000274661	0.00158268
EDRF1	20.6509	12.9167	-0.704052	0.000290342	0.00166588
QRSL1	21.4663	13.3588	-0.704676	0.00029587	0.00169561
AP1S2	31.8041	19.8936	-0.703512	0.00030525	0.00174395
ALOX5	46.725	29.2105	-0.700704	0.000305905	0.00174634
MAP3K1	9.61554	6.0202	-0.702046	0.000308028	0.00175709
NDNL2	21.3712	13.3175	-0.705501	0.000322977	0.00183527
PDK1	10.3165	16.1093	0.619776	0.00034388	0.00194505
STK38	41.1607	64.015	0.61208	0.000351234	0.00198283
SKA2	37.4599	58.3341	0.612053	0.000352301	0.0019881
MFSD3	3.93924	6.30334	0.663703	0.000355891	0.00200682
PLEKHB2	28.5416	44.3288	0.611108	0.000365062	0.0020546
GSTO1	68.0544	106.404	0.615043	0.000365446	0.00205598
FOXN3	16.5965	10.4516	-0.690779	0.000366356	0.00206012
C15orf61	4.5455	7.24662	0.675963	0.000366462	0.00206012
VAMP1	57.5975	88.8737	0.609985	0.000366911	0.00206186
DLGAP4	6.80223	4.22055	-0.711918	0.000367195	0.00206267
RNASEH2B	121.235	77.0713	-0.687855	0.000376488	0.00210844
NIT2	31.58	49.2592	0.614969	0.000380124	0.0021272
RALGPS2	37.7791	23.8782	-0.686356	0.000385753	0.00215134
TOR2A	7.53297	11.856	0.630637	0.000386071	0.0021523
ZRSR2	24.9815	38.9825	0.611995	0.000398274	0.00221614
RNF103	12.826	19.9207	0.612719	0.000398746	0.00221793
FAM111A	40.7816	63.1811	0.604453	0.000415179	0.00230065
LOC374443	8.50501	5.30002	-0.708229	0.000420211	0.00232329
ZSWIM8-AS1	5.82665	3.55349	-0.736122	0.000423404	0.00233832
METTL7A	28.4283	43.8967	0.604582	0.000424272	0.00234224
PLCXD1	29.345	18.5721	-0.684495	0.00042981	0.00236837
FXR2	9.30584	14.4602	0.607452	0.000437048	0.00240556
GOT1	20.5924	31.8774	0.606995	0.000449917	0.0024727
FTH1	744.086	1148.05	0.599127	0.000451438	0.00247921
DLEU2L	5.70292	8.96437	0.631628	0.000456164	0.0025005
ARHGAP4	22.1797	34.3265	0.603028	0.000457684	0.0025079
STIM2	29.8076	18.9819	-0.677346	0.000461035	0.00252533
RPL23AP7	21.2197	33.0517	0.619277	0.000471555	0.00258007
PPP1R16B	24.9577	15.8082	-0.675033	0.000482903	0.0026324
GOT2	138.275	88.3232	-0.672822	0.000488091	0.00265773
CALCOCO2	15.8094	24.3525	0.600835	0.000493703	0.00268432
TTC19	18.8608	29.1056	0.599054	0.000505105	0.00274327
PYGB	9.41415	14.5246	0.600532	0.000516661	0.00280088
REEP5	26.7917	41.2372	0.596022	0.000528963	0.00285811
JMJD7	3.20049	5.09788	0.652927	0.000538181	0.00290259
MAFK	13.707	8.74875	-0.675249	0.000551288	0.00297002
CLCC1	7.22609	4.59393	-0.679542	0.000557656	0.00299667
RBM33	16.4651	10.5616	-0.665734	0.000571996	0.00306145
TAF7	95.0002	145.508	0.588635	0.000584767	0.00312299
CCDC71L	3.86078	5.9828	0.606277	0.000590299	0.00315026
IL16	15.2009	9.73358	-0.66515	0.000602679	0.00321057
NAAA	12.4688	7.91579	-0.680258	0.00060269	0.00321057
INIP	12.9473	19.9607	0.601222	0.000603558	0.00321287
PSMB10	30.8555	47.4359	0.594723	0.00060609	0.00322518
ATP5S	5.5558	8.69277	0.614503	0.000616454	0.00327679
ZNF322	6.73421	4.30705	-0.672872	0.000629074	0.00333665
TMEM194B	3.79833	5.8836	0.603385	0.000634747	0.00336432
IL10RB	15.8012	10.0751	-0.671928	0.000637834	0.00337946
AGAP5	5.53524	3.51259	-0.679053	0.000732438	0.00383113
NUP160	24.7535	16.0598	-0.648747	0.000780275	0.00405831
CRADD	5.70038	8.86931	0.612759	0.000827558	0.00427557
TMTC4	10.4351	6.77169	-0.648814	0.000852822	0.00438
PHF7	2.67615	4.19491	0.627192	0.00089088	0.00455009
PFDN1	60.5028	39.3534	-0.641402	0.000930697	0.00472399
RERE	36.898	24.1324	-0.635927	0.000963486	0.00486529
ADORA2A	21.5329	14.0432	-0.641316	0.000994381	0.00500416
CBX2	6.60998	4.28578	-0.645709	0.00100545	0.00504778
AP3M2	8.76385	5.70797	-0.642808	0.00102163	0.00511509
SMARCB1	160.082	104.834	-0.631642	0.00103636	0.00517651
LBHD1	7.8926	12.0749	0.594562	0.00106852	0.00531377
ZSCAN21	6.30673	4.07967	-0.658879	0.00116276	0.0057302
ADNP-AS1	2.72924	4.37428	0.635208	0.00119581	0.00586955
SMIM13	5.63327	3.68172	-0.634438	0.00120051	0.00589065
NR1D1	4.45547	2.85806	-0.653315	0.00121446	0.00594919
ICE1	9.50793	6.27636	-0.623698	0.00128035	0.0062387
PRKX	9.50949	6.27988	-0.624952	0.00129444	0.00630122
SLC9A7	13.6251	9.07073	-0.609923	0.00154678	0.00735234
TBC1D9B	14.5467	9.67443	-0.609472	0.00162667	0.00769236
TMEM185B	5.85575	3.8849	-0.617976	0.00167799	0.00790211
SNRPB2	99.5718	67.0371	-0.601098	0.00178918	0.00835849
HPS4	24.8576	16.703	-0.601327	0.00180471	0.00841818
MKL1	13.3122	8.85973	-0.601266	0.00192979	0.00891416
WASF2	39.2132	26.3881	-0.593489	0.00201835	0.0092854
MORC2	19.9709	13.4445	-0.594784	0.00207723	0.00951178
IFT22	7.00829	4.65816	-0.614436	0.00208301	0.00952936
SNX19	14.8996	10.0256	-0.597558	0.00208853	0.00954867
PROSER1	19.479	13.1408	-0.590993	0.00212234	0.00967326
CCBL1	12.9032	8.6884	-0.598905	0.00222453	0.0100581
ZDHHC4	47.5738	32.0085	-0.590173	0.00224668	0.0101458
GUSBP1	4.85355	3.20426	-0.62803	0.00239321	0.0107319
SREK1IP1	5.15276	3.48823	-0.591078	0.00246447	0.0109913
SCAMP4	8.31756	5.59322	-0.597986	0.0026202	0.0116016

## Sheet: D
Table S5D. List of differentially expressed genes in DLBCL
Gene	Expr_mean(EBV–)	Expr_mean(EBV+)	logFC	PValue	FDR
ENTPD2	0.0387544	13.0695	8.4401	4.08962e-256	7.03619e-252
CCL1	0.508225	65.1154	6.97227	3.37089e-179	1.93321e-175
MUCL1	0.291979	42.3781	7.06345	1.94166e-173	8.35157e-170
GLP1R	0.0578727	6.94994	6.96885	2.20593e-167	7.59061e-164
NDUFC2-KCTD14	0.610622	16.6234	4.66248	7.3495e-55	9.03201e-52
SPINK1	0.101154	4.12351	5.24633	2.33027e-54	2.67282e-51
XIRP1	0.209783	5.38257	4.54434	1.14594e-50	1.23225e-47
FFAR2	0.642631	15.3897	4.54536	1.35906e-48	1.29904e-45
APOBEC3A	1.76513	36.8899	4.34748	5.80084e-44	4.53652e-41
CCL7	0.62815	12.0143	4.27523	8.86434e-40	6.10044e-37
CD300E	1.55601	26.5661	4.04469	5.95257e-36	3.65764e-33
MCEMP1	0.362651	5.66496	4.081	5.69965e-33	2.80178e-30
SLC11A1	1.22132	17.6798	3.79232	3.80737e-30	1.67964e-27
APCDD1	1.02894	14.0858	3.76464	7.40479e-29	3.03332e-26
CXCL1	4.17723	53.9349	3.72275	1.3653e-27	5.22001e-25
NIPAL4	0.486134	6.18397	3.64888	1.31091e-26	4.77456e-24
IL1R2	2.83334	36.2537	3.62431	2.70084e-26	9.29358e-24
RRAD	1.75577	23.692	3.6203	3.02856e-26	1.02169e-23
IRG1	0.643694	7.97014	3.55308	2.34834e-25	7.62324e-23
IL1RN	6.82698	82.7893	3.54129	6.88888e-25	2.15497e-22
VMO1	1.26422	16.0565	3.4974	3.33699e-24	9.73101e-22
IL27	0.465151	5.80458	3.42703	6.31657e-23	1.75285e-20
CCL8	8.9978	94.7164	3.39336	5.97992e-22	1.55886e-19
G0S2	12.8209	141.096	3.37232	8.03458e-22	2.03287e-19
RASD1	0.774127	8.10732	3.37686	2.81551e-21	6.92012e-19
CHAC1	0.72164	7.49397	3.32035	5.11386e-21	1.222e-18
ADAMTS4	2.55174	26.137	3.30074	1.37671e-20	3.15817e-18
TNFRSF8	3.59135	35.9191	3.26877	4.15316e-20	9.402e-18
TREM1	3.61127	35.1144	3.22302	3.33577e-19	6.75198e-17
PDGFA	2.41335	21.8072	3.16758	2.43436e-18	4.60255e-16
GLT1D1	1.67708	15.9494	3.15062	3.01696e-18	5.64203e-16
CLEC5A	0.472696	4.21137	3.14631	8.86782e-18	1.61352e-15
PI15	2.29386	20.6555	3.13234	8.9093e-18	1.61352e-15
TRIM69	2.34893	20.9971	3.13137	1.59006e-17	2.82031e-15
FOSL1	0.768168	6.73224	3.04553	1.42099e-16	2.3284e-14
TCL1A	180.202	0.436807	-8.6502	3.22617e-16	5.23644e-14
CCL3L1	4.03984	33.6308	2.99929	7.66784e-16	1.19932e-13
OSM	1.91521	15.2513	2.91269	9.29996e-15	1.41598e-12
TMEM158	0.835084	6.53501	2.91366	9.83906e-15	1.48492e-12
COL5A3	2.01778	15.2811	2.85221	3.07034e-14	4.29474e-12
TNFAIP6	4.3619	32.8693	2.86826	3.55299e-14	4.92977e-12
BCAS1	2.53511	18.0974	2.81792	9.74104e-14	1.32926e-11
EGFL6	1.62151	12.0062	2.82215	1.42733e-13	1.88901e-11
ANXA3	1.43378	9.49453	2.82312	3.23085e-13	4.14827e-11
FDCSP	141.516	0.940157	-7.21943	3.92969e-13	5.00818e-11
TCL1B	9.33932	0.00389859	-11.2336	4.89094e-13	6.14224e-11
CD1C	23.6559	0.169688	-7.11904	5.80933e-13	7.19061e-11
KSR1	1.18944	7.99458	2.70333	2.10269e-12	2.47786e-10
TMPRSS3	1.11409	7.55168	2.66633	2.91183e-12	3.40803e-10
FAM129C	37.4797	0.358618	-6.67802	3.70075e-12	4.24476e-10
AQP9	6.2775	41.2668	2.67766	3.94247e-12	4.46251e-10
EEF1A2	8.0179	51.2574	2.62799	1.04722e-11	1.11218e-09
DUSP4	4.97632	31.2714	2.63286	1.08125e-11	1.14128e-09
SIGLEC1	3.94265	24.7398	2.6242	1.29042e-11	1.32944e-09
CDKN1A	26.2288	167.248	2.62287	1.33002e-11	1.3586e-09
STATH	11.5996	0.0255035	-8.74769	1.33452e-11	1.3586e-09
CP	7.59695	46.8173	2.62047	1.51256e-11	1.513e-09
CD163	32.9787	206.546	2.61724	1.53602e-11	1.52758e-09
MARCO	16.5668	101.569	2.57206	4.18184e-11	3.88669e-09
CCL22	22.6395	136.098	2.57337	4.20183e-11	3.88669e-09
VSIG4	30.7088	179.821	2.55435	6.60061e-11	5.94574e-09
KLHL14	17.3359	0.264886	-6.00828	7.75023e-11	6.87334e-09
CA12	3.37413	20.1925	2.54502	8.94743e-11	7.85411e-09
APLN	1.00838	5.69472	2.54733	1.24991e-10	1.05415e-08
HSPA7	1.80099	10.8533	2.51596	1.48946e-10	1.24898e-08
CSF3R	5.24926	30.8044	2.51984	1.56877e-10	1.3039e-08
CASP5	1.34566	7.73639	2.5127	2.71593e-10	2.18353e-08
CD70	24.2304	140.233	2.48881	2.85837e-10	2.27677e-08
TPPP3	1.63903	9.81102	2.48198	2.88223e-10	2.28519e-08
CD24	95.4209	1.96744	-5.61894	4.1726e-10	3.21926e-08
FAM81A	5.89921	0.104999	-5.81951	4.31137e-10	3.28217e-08
HELZ2	3.03481	16.9377	2.43819	8.01263e-10	5.86627e-08
FCRL2	38.8608	0.883522	-5.47677	8.97282e-10	6.54142e-08
BACH2	9.68109	0.220356	-5.45646	1.01437e-09	7.30218e-08
IDO1	39.8647	220.445	2.4258	1.04186e-09	7.46881e-08
MEFV	0.986242	5.35782	2.41588	1.58708e-09	1.07928e-07
ADGRE1	2.24927	12.1287	2.41042	1.60806e-09	1.08924e-07
TBX21	2.92496	16.0301	2.41042	1.62683e-09	1.09763e-07
MT1G	77.0626	424.514	2.37687	2.65426e-09	1.73603e-07
GNA15	5.24493	28.0718	2.3627	3.5998e-09	2.29387e-07
DOK4	1.86461	9.89178	2.34242	6.01837e-09	3.70135e-07
HTN3	4.62548	0.0288574	-7.39957	6.3102e-09	3.84989e-07
KCNJ15	0.940167	4.84876	2.35698	6.58444e-09	4.00301e-07
EBF4	0.908746	4.63681	2.3332	6.63727e-09	4.01598e-07
PFKFB3	23.1822	117.359	2.3315	6.78721e-09	4.06878e-07
IFIT3	13.8552	70.8632	2.31987	9.05995e-09	5.19588e-07
BATF2	3.36617	17.2691	2.31805	9.14634e-09	5.228e-07
MT1M	8.78706	47.4692	2.29268	1.05549e-08	5.99328e-07
KCNMA1	22.0392	109.063	2.30125	1.2069e-08	6.74179e-07
OAS3	8.97446	45.065	2.2998	1.24338e-08	6.92307e-07
MT1H	40.9519	214.277	2.27688	1.70775e-08	9.23958e-07
P2RY12	7.34476	0.245772	-4.89369	2.63272e-08	1.37678e-06
OASL	5.88696	28.6882	2.24335	3.51923e-08	1.81827e-06
FURIN	12.9933	62.771	2.24008	3.63544e-08	1.8671e-06
HMSD	1.9953	9.80471	2.25308	4.45456e-08	2.25414e-06
FPR2	3.13613	14.9664	2.23863	5.2656e-08	2.59583e-06
ANKRD22	9.51676	44.9499	2.21467	5.79378e-08	2.83994e-06
SCO2	8.79316	42.1959	2.1885	8.37157e-08	3.98983e-06
GBP5	33.6525	154.376	2.17921	1.05283e-07	4.88247e-06
THEMIS2	34.7729	160.094	2.17315	1.16528e-07	5.31957e-06
FCRL1	16.8232	0.781025	-4.41284	1.3032e-07	5.91599e-06
DUSP5	11.4686	52.622	2.16495	1.35022e-07	6.09725e-06
INSL3	1.32369	6.19249	2.14962	1.73888e-07	7.61257e-06
KCNJ2	0.988335	4.44748	2.16018	1.8832e-07	8.10012e-06
BCL11A	28.0867	1.42585	-4.31522	1.94118e-07	8.30796e-06
GPR132	4.83555	22.0162	2.1384	2.01026e-07	8.53986e-06
APOBR	2.34844	10.8243	2.12781	2.43572e-07	1.02211e-05
SIGLEC14	9.22099	40.8688	2.11534	3.09035e-07	1.26594e-05
RGS16	15.0602	66.3891	2.09679	4.20194e-07	1.67736e-05
FAM225A	0.970956	4.20171	2.08459	5.12886e-07	2.01466e-05
IL12RB2	0.984723	4.246	2.08856	5.29695e-07	2.06891e-05
MT1F	20.201	89.4454	2.07345	5.48986e-07	2.13695e-05
ADAMTS2	5.40744	23.4565	2.0776	5.53375e-07	2.14917e-05
TNFSF9	6.14099	26.8037	2.07808	5.63104e-07	2.17224e-05
SLCO4A1	3.87753	16.5691	2.06955	5.9033e-07	2.24704e-05
OSCAR	3.79188	16.6241	2.0616	6.58771e-07	2.47471e-05
HSPA6	2.64182	11.1175	2.05445	8.82163e-07	3.24308e-05
P2RY6	2.10555	8.89423	2.04084	9.42568e-07	3.42128e-05
TMEM150B	3.17278	13.4115	2.0389	9.49955e-07	3.44084e-05
MT1L	3.58937	15.8762	2.02601	1.1163e-06	3.99292e-05
HTRA3	6.28036	26.0743	2.0096	1.50168e-06	5.13646e-05
SOCS3	18.8277	76.8656	1.99421	1.94406e-06	6.48209e-05
FCRLA	179.038	13.1955	-3.78766	2.08288e-06	6.89152e-05
IL2RB	27.6537	109.508	1.98762	2.11731e-06	6.97573e-05
PLAUR	20.5572	84.1871	1.98649	2.1286e-06	6.97573e-05
LAMB3	1.48128	6.21245	1.98455	2.14252e-06	7.00801e-05
GPR84	3.25579	13.2992	1.96894	2.45037e-06	7.88012e-05
FCGR2A	23.8518	94.8705	1.97788	2.52128e-06	8.07796e-05
ADAMTSL4	1.271	5.08315	1.97472	2.74597e-06	8.71669e-05
LOC731424	1.07039	4.36201	1.96948	2.84039e-06	8.97285e-05
PDK4	5.83314	0.433919	-3.77071	2.86214e-06	9.01888e-05
IFNG	9.17773	36.7677	1.96777	2.96349e-06	9.28724e-05
NLRP3	1.03548	4.15348	1.96715	3.03668e-06	9.48204e-05
DYSF	3.51756	13.8719	1.96159	3.19835e-06	9.89704e-05
DHX58	4.44464	17.8191	1.94292	3.95266e-06	0.000119308
LMNA	27.3741	108.011	1.93991	4.15785e-06	0.000125168
SECTM1	10.3799	41.055	1.93873	4.20278e-06	0.000125849
SEPP1	117.837	9.44885	-3.63545	4.21241e-06	0.000125849
HK3	5.56051	21.9934	1.93471	4.38909e-06	0.000130143
PRDM1	11.6044	44.3424	1.93258	4.70806e-06	0.000138702
F3	3.30154	12.9566	1.94394	4.72546e-06	0.000138977
C1orf115	6.15825	0.48904	-3.66139	4.91091e-06	0.00014345
LILRB2	10.3412	40.1107	1.92741	5.05773e-06	0.000147489
GBP1P1	1.50883	5.78929	1.92374	6.68857e-06	0.000188342
LAG3	25.7025	97.9949	1.8889	8.31351e-06	0.000228489
DEPTOR	4.47447	0.375592	-3.52997	8.78563e-06	0.000239551
SLC6A8	1.32518	4.89416	1.88732	9.7341e-06	0.000261272
LILRB3	4.66582	17.5132	1.87772	1.01806e-05	0.000271983
WFDC2	6.20457	22.902	1.86661	1.06555e-05	0.000282913
COL15A1	9.57076	35.3307	1.86269	1.18228e-05	0.000311026
CYGB	3.07835	11.7182	1.86287	1.20741e-05	0.000316186
FAM129B	6.63323	24.8153	1.8604	1.24512e-05	0.00032409
LOC284454	2.10749	7.84751	1.85342	1.46299e-05	0.000373287
SCARF1	2.51682	9.35544	1.85113	1.46451e-05	0.000373287
ABCA6	8.61116	0.857802	-3.36683	1.51808e-05	0.000385798
NINJ1	54.3876	197.675	1.8387	1.60776e-05	0.000403818
FOSL2	3.93004	14.4498	1.83841	1.66228e-05	0.000415088
ASB2	23.8856	2.38262	-3.33866	1.69408e-05	0.000422414
FCGR3A	42.7044	153.103	1.83254	1.78073e-05	0.000442739
FAM26F	52.3171	189.608	1.82862	1.87002e-05	0.000460281
CD209	1.95624	6.87059	1.84278	1.94655e-05	0.000476393
FCGR1A	16.3848	58.6342	1.82345	1.97227e-05	0.000479956
FGR	16.066	58.0761	1.81774	2.12637e-05	0.000511668
CTSL	108.644	390.209	1.8156	2.17333e-05	0.000520057
TNFAIP2	26.3308	94.0926	1.81303	2.23373e-05	0.000531553
CEBPB	11.7965	43.1427	1.81169	2.28476e-05	0.00054145
PDGFD	14.0778	1.46023	-3.26127	2.36709e-05	0.000557125
CD274	8.69098	31.1997	1.80819	2.40107e-05	0.000562045
BCL2L14	1.84941	6.6615	1.79501	2.75017e-05	0.000631731
LILRA6	2.81889	9.89726	1.79699	2.83674e-05	0.000648842
ERRFI1	3.98912	14.2544	1.79677	2.87237e-05	0.000654558
RIN3	7.31669	25.3426	1.78957	2.98276e-05	0.000675666
GZMB	55.0633	192.697	1.78834	3.03103e-05	0.000685268
CD180	63.4324	6.97975	-3.1805	3.25199e-05	0.000730423
COL6A3	30.5772	106.436	1.78111	3.31976e-05	0.000743704
COL4A1	28.8718	101.366	1.78086	3.3528e-05	0.000748902
HRH2	1.22723	4.26122	1.7786	3.35602e-05	0.000748902
ARID3A	4.28158	14.8536	1.77891	3.37651e-05	0.000752499
MT2A	205.739	742.711	1.77529	3.53512e-05	0.000782776
MAFF	3.27221	11.6501	1.78055	3.5473e-05	0.000784463
CD248	7.47293	26.3647	1.77095	3.65526e-05	0.000804203
FOXP3	6.31946	22.0294	1.76616	3.83954e-05	0.000836192
BMP1	3.79925	13.4189	1.7672	3.84666e-05	0.000836685
RORA	1.40266	4.91208	1.77109	4.07911e-05	0.000878361
TSPAN7	9.07675	1.01271	-3.16908	4.17835e-05	0.000897484
CNR2	16.1713	1.83008	-3.14851	4.24301e-05	0.000906954
RAB38	1.86704	6.43026	1.77152	4.27502e-05	0.000912553
PIK3R5	4.87429	16.7741	1.7552	4.51443e-05	0.000958897
HSPA1A	24.1239	83.6736	1.75472	4.58067e-05	0.000971724
PRF1	23.2926	79.4219	1.74938	4.83163e-05	0.00101748
KIFC3	2.61902	9.22066	1.74285	4.9699e-05	0.0010415
IFFO2	2.92399	10.0417	1.74619	5.06893e-05	0.00105839
VEGFA	8.26346	28.1132	1.74826	5.1633e-05	0.00107624
FRZB	5.69111	0.639791	-3.07747	5.40167e-05	0.00112106
FABP3	8.4251	0.979717	-3.11851	5.50698e-05	0.00113879
MT1E	29.5819	103.381	1.73121	5.88397e-05	0.00120468
ATF3	6.98046	23.4911	1.72915	6.45129e-05	0.00131044
S100A8	93.3989	318.762	1.72471	6.56343e-05	0.00133008
CD14	83.0288	282.033	1.71953	6.87325e-05	0.00138471
MXD1	3.25595	11.0329	1.72266	7.13988e-05	0.00142674
CCL18	185.463	619.479	1.71684	7.13991e-05	0.00142674
SLC39A8	41.6513	139.557	1.71569	7.29318e-05	0.00145221
GADD45A	9.63517	32.3774	1.72016	7.44703e-05	0.00147781
DLG4	1.68017	5.59899	1.71812	7.47446e-05	0.00148155
COL4A2	24.5965	82.4436	1.71128	7.60692e-05	0.00150433
LIPG	1.77977	5.98514	1.71347	8.0703e-05	0.00157247
CCL4	54.6208	182.465	1.70358	8.4075e-05	0.00163263
NID2	2.46178	8.10208	1.69675	8.979e-05	0.00172762
LRP12	1.26793	4.21394	1.71495	9.06368e-05	0.00173847
ABLIM1	28.6761	3.81657	-2.93103	9.56001e-05	0.00181947
LINC01272	4.69571	15.3977	1.68025	0.000109474	0.00204952
VPS9D1	2.72642	9.16238	1.6788	0.000109918	0.00205559
METRNL	8.98664	30.031	1.67802	0.000110612	0.00206408
ZC3H12C	1.33381	4.37331	1.68149	0.000116175	0.00215387
ITGA5	12.2317	39.4466	1.66363	0.000129274	0.0023561
LRMP	190.222	26.8446	-2.82332	0.000151365	0.0026931
MT1X	48.0771	156.266	1.6416	0.000161869	0.00285636
TNFRSF18	8.45422	28.2004	1.63492	0.000165089	0.00290722
VDR	6.67261	21.1577	1.63953	0.000168656	0.002967
MUC1	1.56557	5.21061	1.63461	0.000173547	0.00304328
SIK1	6.09763	19.2056	1.63744	0.000173699	0.00304328
FOXP1	24.3657	3.52701	-2.78542	0.000178602	0.00311332
RGS5	13.2869	1.95937	-2.79157	0.000178979	0.00311673
FCGR2C	1.69351	5.40667	1.63443	0.000179278	0.00311878
FCGR1B	4.13244	13.0663	1.6329	0.000182732	0.00316606
TNIK	2.13308	6.68413	1.62948	0.000188203	0.00323803
SLC2A3	20.2368	64.3817	1.62738	0.000192821	0.00330757
HYOU1	39.8055	124.754	1.62655	0.000193745	0.00331679
LIMK2	11.7415	37.052	1.62366	0.000198957	0.00338581
RAB30	18.6214	2.77999	-2.74832	0.00020845	0.00351951
SMOC2	4.07328	0.604102	-2.78402	0.000213512	0.0035944
NDRG1	31.7692	100.233	1.6159	0.000217458	0.00365012
STAP1	58.1052	8.78275	-2.73988	0.000220697	0.00369368
GTF2H2	9.58769	1.41652	-2.75041	0.000222246	0.00371598
ADAM8	14.5162	45.4629	1.61035	0.000226138	0.00375914
MIAT	4.26413	13.2462	1.60858	0.00023304	0.00385155
LRRC25	8.07787	24.9598	1.60914	0.000237026	0.00390616
SLC27A2	1.94844	6.00775	1.59967	0.000260382	0.00425439
KBTBD8	19.9096	3.13079	-2.69168	0.000268977	0.00437405
CADM1	12.1319	37.628	1.59608	0.000272342	0.00442042
CYB561	3.30568	10.2635	1.58452	0.000299682	0.00480077
RNF213	13.2444	40.1664	1.58289	0.000305329	0.00488668
MYO1G	29.479	88.7698	1.58161	0.000308187	0.00492784
NOD2	2.84199	8.67284	1.57645	0.000318128	0.0050529
HIST1H3D	1.67913	5.20443	1.5797	0.000331917	0.00523431
GBP1	76.3358	230.262	1.57399	0.000334985	0.00527785
SPRY4	2.1117	6.42547	1.5853	0.000336138	0.00529117
SERPING1	145.815	439.553	1.5732	0.00033741	0.00530635
PDGFRB	12.4071	37.4968	1.57227	0.000341577	0.00535719
HSPA1B	24.2519	73.8687	1.57159	0.000344102	0.00538697
AQP1	18.7333	3.01621	-2.63919	0.000344557	0.00538919
VNN2	46.6837	7.54666	-2.63218	0.000344919	0.00538994
PSTPIP2	13.0551	39.1701	1.57045	0.00035985	0.00560799
ARHGAP24	11.7436	1.9039	-2.6242	0.000364591	0.00566136
ADAMTS1	2.87473	8.70147	1.56546	0.000380793	0.00588109
ARID5A	27.7331	83.2928	1.55833	0.000387221	0.00596965
ALDH5A1	21.3921	3.5806	-2.5886	0.000415235	0.00633906
CCND1	8.92647	26.7269	1.553	0.000420023	0.00638948
IFITM1	175.763	524.651	1.54355	0.000454153	0.00684812
HEY1	1.38786	4.11768	1.55524	0.000460011	0.00691222
ANGPTL2	6.81006	20.2369	1.54478	0.000476214	0.00712457
CYP1B1	11.6136	34.6743	1.53754	0.000497748	0.00738891
SOD2	167.067	496.349	1.53302	0.000504091	0.00747663
CXCR3	13.1891	38.9971	1.52891	0.000508652	0.00752482
NAPSB	214.837	37.8365	-2.53101	0.00052135	0.00766652
ADGRE5	28.7161	84.832	1.52812	0.000526425	0.00772135
ITGAM	6.102	17.9838	1.52344	0.000548719	0.0080006
COL6A1	45.4175	134.081	1.52378	0.00054957	0.00800622
DDX60L	3.14914	9.32262	1.52662	0.000558918	0.00811141
IFITM3	162.089	478.702	1.52033	0.000569832	0.00823863
MCAM	13.8577	39.7919	1.51991	0.000578431	0.00831678
BCAR1	3.25335	9.66189	1.51912	0.000580047	0.00833031
XAF1	13.0011	38.2754	1.5193	0.000588678	0.00844722
CNTNAP1	4.20961	12.0556	1.51314	0.000601692	0.00861958
CTPS2	19.0684	3.43504	-2.5017	0.000602766	0.00862778
CRISPLD2	6.61351	19.3914	1.51196	0.000631196	0.00896017
NACC2	1.65211	4.76577	1.50159	0.0006804	0.00954835
NEAT1	59.4205	170.694	1.49825	0.000705594	0.0098218
ZBP1	3.28992	9.53853	1.49255	0.000736591	0.0102037
IL18BP	30.6114	87.0585	1.49029	0.000758848	0.0104783
PIEZO1	5.29817	15.1172	1.48592	0.000783566	0.0107592
NOTCH3	4.09177	11.6694	1.48494	0.000789076	0.0108262
GCNT2	5.6506	1.04411	-2.44473	0.000790218	0.0108332
SEMA4D	21.4735	60.3866	1.48277	0.000811231	0.011086
PLEKHH3	1.939	5.62591	1.46911	0.000817138	0.0111252
NCF2	26.8426	76.1536	1.47821	0.000848369	0.0114911
CCL2	63.2387	179.725	1.47517	0.000890461	0.0119784
CDCA7	50.981	9.68433	-2.39826	0.000899218	0.0120585
ZNF185	15.2191	2.88038	-2.40474	0.000907317	0.0121387
SESN2	4.58012	13.0293	1.46659	0.000937138	0.0124218
CCR1	14.2644	39.8582	1.46885	0.000943128	0.0124819
FCAR	1.44534	4.08899	1.4839	0.000956978	0.0126555
CD80	10.0847	28.1185	1.46554	0.000990122	0.0129939
LDLR	2.7798	7.72055	1.45464	0.00106601	0.0138944
SERPINA1	50.518	139.274	1.4451	0.00115042	0.0148151
GLUL	65.7651	180.358	1.44313	0.00117207	0.014993
ACSL1	22.9501	63.3307	1.44188	0.00118872	0.0151608
BCL2L11	38.3145	7.78884	-2.32463	0.00121477	0.0154071
PDE4A	3.05519	8.44083	1.43789	0.00124085	0.0156977
PREX1	16.9529	46.3755	1.43201	0.00128884	0.0161575
ITGB7	18.4093	50.4097	1.43034	0.0012988	0.0162398
MYO1F	11.9706	33.0987	1.43076	0.00130369	0.016289
CPEB2	2.04356	5.56364	1.42299	0.00147492	0.0179845
SBF2-AS1	4.71934	0.952907	-2.27544	0.00155019	0.0187271
TLR2	10.7227	29.0224	1.41017	0.00158183	0.0190184
PILRA	13.645	36.7507	1.40173	0.00168977	0.0200955
SERPINH1	29.498	79.8263	1.39963	0.00170949	0.0202421
RARA	6.28887	16.8799	1.39789	0.00172143	0.0203415
TRAF1	34.8477	93.5313	1.39844	0.00173222	0.0204269
PFKFB4	2.45405	6.57513	1.39725	0.00175326	0.0206608
ID2	37.507	99.3711	1.39895	0.00177668	0.0209064
TRIP10	10.3212	27.836	1.3959	0.00178054	0.0209107
SYTL3	6.28876	16.7848	1.39405	0.00180989	0.0212409
LOXL3	2.19914	5.8032	1.39083	0.00183444	0.0214171
ENO2	15.4749	41.197	1.39405	0.00183486	0.0214171
CD82	69.0062	183.934	1.38698	0.00190967	0.0220752
LOC100505549	11.5512	2.49277	-2.21738	0.00195629	0.0224686
CD276	7.63908	20.4184	1.37997	0.00202973	0.0231728
C3AR1	16.4344	43.3673	1.37857	0.00208491	0.0237084
LOC115110	1.63846	4.38284	1.36898	0.00208988	0.0237493
CHST2	12.2794	32.1025	1.37469	0.00210514	0.0238463
LY86	68.4639	15.3602	-2.18707	0.00213275	0.0240458
TMEM156	23.6371	5.25428	-2.17584	0.00223029	0.0249332
FICD	1.93702	5.07636	1.35459	0.00236078	0.0261372
CD52	587.03	133.6	-2.15698	0.00236674	0.0261864
ICAM1	57.8608	151.278	1.36148	0.00237507	0.0262448
SEMA3F	2.39054	6.24202	1.35722	0.00241605	0.0265781
CYP2U1	6.02695	1.3375	-2.15443	0.0024671	0.0270245
NBEAL2	10.5742	27.2098	1.34711	0.00266337	0.0288197
TRPV2	17.9603	46.9538	1.34668	0.00267137	0.0288699
LOC400043	3.32602	8.64987	1.3349	0.00276203	0.0296819
MOV10	8.03913	20.7221	1.33878	0.00284556	0.0304465
IGF2R	12.8202	32.6032	1.33735	0.00289434	0.0308915
PRKD3	45.8872	10.7689	-2.10351	0.00291852	0.0310917
PM20D2	12.0306	2.80974	-2.10404	0.00293948	0.0312762
EMP1	9.91264	25.381	1.32653	0.00323844	0.0337272
JAKMIP1	2.1423	5.52138	1.31267	0.00330821	0.0342474
LILRB4	68.9195	173.657	1.31467	0.00347439	0.0356877
C2	46.0043	116.125	1.31438	0.003481	0.0357165
TNFAIP3	32.4703	81.7768	1.31338	0.00352233	0.0359868
HS3ST3B1	2.6678	6.7809	1.31526	0.00354013	0.0361157
CTNNAL1	13.1932	3.21311	-2.05092	0.00366621	0.0370824
STRBP	16.6097	4.11494	-2.03166	0.00387253	0.0387816
ZCCHC7	37.9524	9.46632	-2.01359	0.00413392	0.0410173
NUDT7	5.66999	1.36271	-2.04937	0.00414452	0.0410515
SMAD7	5.56061	13.9263	1.29171	0.00421933	0.0416726
CRELD2	15.6589	39.4776	1.28677	0.00427633	0.0421147
HSPG2	5.60858	13.8506	1.28255	0.00445019	0.0435278
SBNO2	14.494	35.9453	1.28074	0.00450744	0.0439878
FAM20C	6.45457	16.3114	1.27875	0.00456046	0.0443543
TNFRSF10D	2.84751	7.13014	1.28487	0.00460676	0.0447035
APOL3	41.9227	103.526	1.27785	0.00464013	0.0450019
GCH1	22.9669	56.3237	1.27826	0.00468926	0.0453251
CHST11	12.4287	30.5413	1.27488	0.00476609	0.0458616
DCK	85.2276	21.8876	-1.97332	0.0048094	0.0462267
SLC25A37	5.82406	14.4318	1.27339	0.00490191	0.0469199
CXCL16	23.5374	57.6188	1.26885	0.00498532	0.0476248
LSP1	189.042	465.71	1.26778	0.00500921	0.0477207
ATP13A2	11.898	29.0857	1.26313	0.00514555	0.0487495
SH3BP2	6.73057	16.4116	1.26402	0.00516896	0.0489174
ARID3B	6.01317	14.6624	1.26297	0.00518507	0.0490045
STX7	50.952	13.348	-1.952	0.00523266	0.0493574
YEATS4	40.1514	10.5069	-1.95106	0.00525379	0.0494753

## Sheet: E
Table S5E. List of differentially expressed genes in NPC
Gene	Expr_mean(EBV–)	Expr_mean(EBV+)	logFC	PValue	FDR
MAGEA9	8.6219	0.00498714	-10.8104	0	0
HTR3A	35.412	0.287605	-6.95366	7.23516e-288	4.1525e-284
RGS13	47.1998	0.449081	-6.74751	1.05472e-271	4.54005e-268
C7orf72	5.24724	0.00913306	-9.12886	4.96128e-244	1.42372e-240
FAM129C	166.36	2.57786	-6.04303	1.20115e-229	2.95448e-226
FAM167A-AS1	6.26318	0.0337639	-7.49057	1.41803e-209	3.05195e-206
EML6	33.8367	0.644876	-5.76333	8.60199e-207	1.64566e-203
TCL1A	266.299	5.38496	-5.65635	5.13243e-199	8.03365e-196
TCL1B	9.91945	0.131033	-6.22043	1.13347e-184	1.62634e-181
AICDA	23.6822	0.548761	-5.46389	1.1534e-178	1.52763e-175
ZNF804A	8.84748	0.205614	-5.47857	1.62089e-176	1.86056e-173
KLHL14	12.7592	0.348905	-5.22382	5.32615e-162	5.39445e-159
NOL4	5.70439	0.136515	-5.45562	2.37975e-161	2.27636e-158
ZNF385B	5.48525	0.154255	-5.18362	3.14456e-144	2.57824e-141
DTX1	63.8395	2.30207	-4.8284	3.12531e-138	2.44598e-135
DGKG	5.45784	0.197673	-4.85166	3.12848e-131	2.34201e-128
CD79B	657.567	26.2034	-4.68808	5.91331e-130	4.07262e-127
ABCA6	9.56208	0.385156	-4.68135	9.15657e-125	6.06376e-122
CLEC17A	64.054	2.82921	-4.54147	2.54069e-119	1.45819e-116
AFF3	14.7099	0.652369	-4.53776	1.09553e-118	6.08477e-116
SNX29P1	19.8098	0.777141	-4.69611	5.18449e-118	2.78958e-115
FCRLA	129.723	5.92939	-4.4917	4.60083e-117	2.40052e-114
KIAA0226L	91.9212	4.33018	-4.46414	2.12865e-115	1.01809e-112
ITIH3	4.00102	0.148145	-4.77862	7.32227e-115	3.40743e-112
XXYLT1-AS2	13.9507	0.529608	-4.77346	8.93838e-114	4.05003e-111
PAX5	55.3056	2.77347	-4.35949	2.5251e-109	1.06042e-106
LOC100505622	9.54503	0.326304	-4.88989	9.78523e-109	3.91819e-106
LOC200772	4.15117	0.183011	-4.53029	7.262e-101	2.66036e-98
COCH	14.6442	0.775247	-4.29191	1.38859e-100	4.98097e-98
P2RX5	95.907	5.37791	-4.19863	1.60255e-99	5.51855e-97
TIMD4	14.9813	0.770129	-4.32302	6.25759e-99	2.11261e-96
CD72	139.855	8.05169	-4.16549	1.22949e-97	4.07102e-95
DUSP15	16.7809	0.887501	-4.28086	7.17164e-97	2.32984e-94
CNR2	24.6626	1.36777	-4.20597	1.19645e-96	3.81489e-94
CXCR5	108.6	6.38025	-4.13262	4.53416e-96	1.41944e-93
CILP	10.5411	0.59977	-4.18881	1.60556e-95	4.93652e-93
NAPSB	360.9	21.3989	-4.11655	2.29421e-95	6.93011e-93
CLECL1	48.2975	2.79388	-4.16368	4.99991e-94	1.48428e-91
FCRL2	50.5453	3.04495	-4.0927	4.12576e-93	1.18396e-90
ZNF860	7.55985	0.428613	-4.1967	4.60271e-93	1.29917e-90
BLK	71.2436	4.32329	-4.07851	9.46064e-93	2.62731e-90
ELL3	63.0938	3.85685	-4.07662	3.9087e-92	1.05156e-89
MEF2B	114.423	7.14134	-4.04226	1.12222e-90	2.80035e-88
FCRL1	37.2461	2.36966	-4.0133	7.4747e-89	1.81267e-86
FCRL3	51.9578	3.38765	-3.98874	7.64e-88	1.82702e-85
TNFRSF13B	122.949	8.30209	-3.92813	1.05414e-84	2.45273e-82
CETP	15.2327	1.03651	-3.91151	2.71025e-79	5.83313e-77
C1orf186	10.9178	0.730196	-3.94332	5.73744e-78	1.19021e-75
OSBPL10	23.1813	1.72574	-3.7997	1.11916e-77	2.294e-75
LOC100129697	6.63207	0.422163	-4.00422	5.31953e-77	1.07755e-74
PNMA6A	6.54129	0.450189	-3.90579	6.30646e-75	1.26261e-72
RASGRF1	10.0891	0.782907	-3.74803	6.91384e-74	1.3683e-71
ORM1	31.0476	2.28499	-3.87677	9.48592e-74	1.85601e-71
POU2F2	109.792	8.72753	-3.69454	1.12538e-73	2.17718e-71
HPDL	8.13245	0.599235	-3.80703	7.84065e-71	1.45162e-68
CD19	167.442	14.1294	-3.60246	3.47821e-69	6.174e-67
NFATC1	82.3088	7.10718	-3.58669	2.02381e-68	3.51979e-66
MS4A1	267.686	23.3394	-3.57004	6.74916e-68	1.16207e-65
MYBPC1	0.114686	93.3612	9.57495	7.83245e-68	1.33524e-65
TLR9	30.4707	2.61766	-3.57814	1.47229e-67	2.48528e-65
CD22	133.741	12.1824	-3.49275	2.54204e-64	4.09055e-62
NAPSA	8.67441	0.708167	-3.65067	4.01334e-64	6.39831e-62
CD79A	794.068	76.2615	-3.42432	1.925e-61	2.93316e-59
CD180	44.9947	4.33567	-3.42416	7.26906e-61	1.09788e-58
PLA2G2D	141.412	14.0332	-3.38986	9.55667e-60	1.43084e-57
GTSF1L	7.3813	0.602724	-3.65636	2.85402e-58	4.20005e-56
PLCG2	77.9409	8.08759	-3.31365	9.20148e-57	1.30935e-54
ZBTB32	30.409	3.17107	-3.29666	4.4719e-55	6.20945e-53
HS3ST4	0.00717237	8.06622	10.1725	4.30587e-54	5.93108e-52
CCL20	1.42866	328.051	7.75859	6.07857e-54	8.24101e-52
CARD11	116.349	12.8328	-3.23066	2.11231e-53	2.81936e-51
DAPL1	0.29891	94.7408	8.21567	6.34213e-53	8.33579e-51
PRDM15	41.8224	4.75661	-3.18532	1.73211e-51	2.20915e-49
LINC01215	18.9359	2.13008	-3.21427	2.30134e-51	2.8923e-49
LRMP	98.4313	11.3148	-3.17639	3.3163e-51	4.10791e-49
KRT15	4.72151	747.224	7.27237	9.26832e-51	1.13987e-48
CD37	541.545	62.458	-3.15856	1.20638e-50	1.47316e-48
SCNN1G	0.0322617	10.3517	8.31391	1.43278e-50	1.7373e-48
LOC728989	10.6977	1.12312	-3.29577	1.68059e-50	2.02353e-48
KBTBD8	7.03203	0.80052	-3.19188	5.2512e-50	6.23553e-48
ZNF215	6.51136	0.727575	-3.20759	9.16023e-50	1.07293e-47
DUSP2	91.8293	10.7604	-3.13801	1.49575e-49	1.72844e-47
FSTL4	0.0203789	5.86114	8.12623	2.48803e-49	2.83702e-47
KRT1	0.0312959	10.3402	8.39438	3.1347e-49	3.55087e-47
CHN2	6.23873	0.708745	-3.19621	5.53382e-49	6.22754e-47
FERMT1	0.108344	18.1989	7.30961	6.32242e-49	7.0688e-47
PIM1	116.909	14.1202	-3.10783	1.30724e-48	1.45213e-46
FOXN1	0.0860621	17.1704	7.47553	1.76234e-48	1.94512e-46
PDCD1	49.3963	5.91007	-3.10517	3.57505e-48	3.8959e-46
HOXB13	0.00753958	5.20705	9.44916	5.10105e-48	5.48937e-46
BACH2	9.23764	1.11303	-3.10251	6.07039e-48	6.41226e-46
MPEG1	149.638	18.4225	-3.0856	6.57342e-48	6.90129e-46
SNX29P2	10.7457	1.22584	-3.17014	9.53358e-48	9.94843e-46
PLA2G3	0.0237957	7.95455	8.18614	1.17909e-47	1.22298e-45
SCARA5	4.79128	0.553234	-3.15855	1.40361e-47	1.44715e-45
CR2	30.3539	3.6939	-3.07857	2.60027e-47	2.6492e-45
LINC01480	11.4858	1.19471	-3.29854	4.29624e-47	4.32589e-45
C6orf141	0.134416	24.1719	7.36367	6.3725e-47	6.37917e-45
IGSF9	0.266469	34.0257	6.95143	9.48231e-47	9.38313e-45
PTGDS	487.654	60.7381	-3.04699	1.90264e-46	1.87198e-44
HCG27	13.5782	1.60645	-3.1213	1.97198e-46	1.92918e-44
HAMP	18.4143	2.05421	-3.20482	4.61082e-46	4.48526e-44
LINC00528	15.0173	1.82625	-3.08266	5.33604e-46	5.13273e-44
C1QL2	0.00740018	5.62614	9.78534	6.72712e-46	6.43486e-44
AP3B2	0.100599	14.1518	7.04224	7.37277e-46	7.0135e-44
FOLR2	41.3185	5.14472	-3.05736	9.3832e-46	8.87692e-44
CBFA2T3	28.6419	3.6296	-3.02387	2.58628e-45	2.40706e-43
FAM71E2	0.0747468	11.4604	7.10861	2.75005e-45	2.54572e-43
NFKBID	43.2882	5.48295	-3.02575	4.11864e-45	3.79223e-43
FCRLB	6.61204	0.781829	-3.13357	7.68809e-45	7.00389e-43
MIR205HG	1.28134	135.476	6.66271	1.61084e-44	1.45976e-42
KRT13	3.85816	358.692	6.51766	3.46836e-44	3.11032e-42
FOXQ1	0.15482	18.961	6.81123	5.53602e-44	4.91336e-42
MIR155HG	27.7434	3.60304	-3.0061	9.36159e-44	8.22387e-42
KLHL6	39.7482	5.31277	-2.95802	3.11163e-43	2.71959e-41
RASGRP3	30.3795	4.06139	-2.95572	5.35337e-43	4.65527e-41
SLC43A1	18.0849	2.37458	-2.97972	5.542e-43	4.79508e-41
SP140	105.044	14.0851	-2.94961	5.99715e-43	5.13726e-41
PADI3	0.0229307	4.78639	7.65485	6.443e-43	5.49186e-41
CD1D	6.37082	0.831445	-2.9821	2.13193e-42	1.80825e-40
SPSB4	0.0267671	5.23373	7.51713	2.16279e-42	1.82544e-40
EPCAM	0.806648	69.3486	6.36772	3.56167e-42	2.99146e-40
CALML3	1.03488	87.4383	6.32153	4.2726e-42	3.57115e-40
CD207	0.0731368	10.3022	6.9932	5.46563e-42	4.54624e-40
ESRP1	0.276615	23.8169	6.3542	7.60006e-42	6.26114e-40
CAMP	4.87145	0.517335	-3.27968	1.4135e-41	1.15344e-39
STAP1	25.8295	3.50852	-2.92594	3.62453e-41	2.91622e-39
COL17A1	1.09198	79.6656	6.13291	6.28247e-41	5.03123e-39
NTRK2	0.521166	38.7776	6.13796	6.89062e-41	5.49272e-39
LOC102723927	9.05671	1.20115	-2.95787	6.94347e-41	5.50934e-39
FAT2	0.167593	12.6311	6.17945	7.30184e-41	5.76711e-39
BATF	230.456	32.2943	-2.88736	8.33402e-41	6.52251e-39
ITGB6	0.173632	14.1925	6.27692	8.54025e-41	6.65366e-39
ACY3	15.5113	2.06672	-2.95105	1.2129e-40	9.36489e-39
KLRG2	0.0280631	6.91514	7.77633	1.23079e-40	9.46064e-39
ZFAT	22.5302	3.17679	-2.88061	2.48626e-40	1.9026e-38
GPR87	0.261762	23.331	6.39047	2.54888e-40	1.94189e-38
SOX2	0.514264	38.0931	6.1423	3.09332e-40	2.34629e-38
BTK	59.0781	8.38365	-2.8702	3.49861e-40	2.64207e-38
SLC2A5	40.3026	5.72266	-2.86926	6.02675e-40	4.49215e-38
GJB4	0.113501	9.86769	6.40894	9.90106e-40	7.28532e-38
MIXL1	5.88915	0.779931	-2.95872	1.17627e-39	8.61832e-38
PPP1R14C	0.20523	16.682	6.23742	1.28092e-39	9.34527e-38
TLR10	42.8487	6.10517	-2.85246	1.32489e-39	9.62527e-38
PGLYRP4	0.0723211	7.86861	6.59883	1.58066e-39	1.13874e-37
IKZF1	84.7374	12.3268	-2.84184	1.93791e-39	1.39029e-37
A2ML1	0.0688588	5.87131	6.36824	2.33861e-39	1.6708e-37
CLDN1	1.78026	114.241	5.93867	2.82524e-39	2.01012e-37
RTN4RL1	0.0638748	5.92097	6.39353	3.24644e-39	2.29087e-37
FGFR3	0.695188	44.563	5.94731	3.85271e-39	2.70759e-37
ASB2	19.2666	2.76597	-2.84685	7.14855e-39	4.98315e-37
MAP7D2	0.0569591	5.11899	6.49635	7.83577e-39	5.44017e-37
ADAM23	0.219456	14.4464	5.96001	7.98336e-39	5.51939e-37
HCAR3	0.22976	17.2051	6.1765	8.01398e-39	5.51939e-37
RASGRP2	76.1181	10.9865	-2.82555	9.00522e-39	6.17736e-37
CDCA7L	42.2965	6.19583	-2.82822	9.54921e-39	6.52454e-37
GJB5	0.472576	33.2784	6.05342	1.1378e-38	7.74335e-37
SHISA2	0.207438	14.9167	6.04253	1.27879e-38	8.66861e-37
FOXE1	0.177457	12.5561	6.02205	1.71429e-38	1.15751e-36
C1orf220	4.70516	0.641595	-2.91756	1.75459e-38	1.1801e-36
ZNF488	0.0496438	4.85022	6.54193	1.89516e-38	1.26968e-36
IRF6	0.998809	59.0004	5.82598	2.68514e-38	1.79197e-36
GRHL2	0.270524	16.5097	5.86715	4.45572e-38	2.95071e-36
PKP1	1.14102	65.2439	5.78788	5.06884e-38	3.34388e-36
CCL21	285.851	42.547	-2.78684	1.25124e-37	8.12979e-36
COL21A1	0.149592	9.74735	5.94722	1.52902e-37	9.86192e-36
GAD1	0.0522712	4.94738	6.58924	1.52929e-37	9.86192e-36
DOK3	131.457	19.7906	-2.78176	1.83198e-37	1.17698e-35
TRIM29	2.4645	132.77	5.69635	2.48865e-37	1.58116e-35
RALGPS2	18.581	2.79931	-2.7815	2.54732e-37	1.61249e-35
PTGS2	0.214176	12.6831	5.80664	3.84258e-37	2.4235e-35
LEMD1	0.0745064	11.2493	7.1727	5.0736e-37	3.18822e-35
ARL14	0.0624543	7.41865	6.84855	5.5061e-37	3.44742e-35
CECR7	5.0929	0.722005	-2.86151	7.087e-37	4.42116e-35
CADM3	6.4224	0.938547	-2.80508	1.09138e-36	6.7839e-35
GRAMD1B	8.79414	1.33888	-2.77224	1.19054e-36	7.37366e-35
KRT5	36.4285	1790.03	5.56496	2.08378e-36	1.27682e-34
SFRP1	0.16192	9.23318	5.75825	2.4852e-36	1.51738e-34
WNK2	0.462594	23.1867	5.60668	2.7652e-36	1.67645e-34
TENM2	0.141695	7.44968	5.63024	4.23538e-36	2.55876e-34
GPR18	29.407	4.51349	-2.75231	7.23721e-36	4.32675e-34
FGF1	0.17012	9.55428	5.72838	7.76599e-36	4.62681e-34
RNF165	0.133733	7.52973	5.74586	9.98949e-36	5.931e-34
IRF8	106.594	16.7391	-2.72507	1.02632e-35	6.07259e-34
FCRL5	48.8491	7.64842	-2.72006	1.46661e-35	8.56004e-34
TOX	16.6209	2.59871	-2.7315	1.67841e-35	9.76312e-34
PTPRZ1	0.0868431	4.91123	5.72104	2.25214e-35	1.30563e-33
KRT19	24.7605	1111.95	5.43855	2.35469e-35	1.36051e-33
ANXA8	1.55905	72.3588	5.47723	2.59562e-35	1.4947e-33
AZGP1	0.0755755	7.20715	6.60459	2.70933e-35	1.55497e-33
ESPN	0.226315	11.6562	5.61765	2.90295e-35	1.66057e-33
TMEM243	98.2737	15.5701	-2.71387	3.76921e-35	2.14186e-33
MAL2	0.823092	38.2115	5.46965	3.92147e-35	2.22105e-33
PGLYRP3	0.0165327	4.5614	7.89822	4.40292e-35	2.48556e-33
SIT1	65.6193	10.3563	-2.71467	4.54191e-35	2.55564e-33
FXYD3	5.65499	249.476	5.41749	5.15719e-35	2.89239e-33
LOC102723824	9.66328	1.46606	-2.77324	5.47509e-35	3.06072e-33
NOS2	0.15243	8.09905	5.67207	5.76711e-35	3.21353e-33
CLCA2	0.254034	12.4921	5.5224	6.61347e-35	3.6497e-33
ANKLE1	10.3794	1.61324	-2.72885	8.0373e-35	4.4072e-33
ZNF608	12.5341	1.9989	-2.70735	8.15944e-35	4.45997e-33
SUSD4	0.65011	29.8996	5.45955	9.04477e-35	4.92826e-33
ANXA8L1	1.41519	62.8531	5.41814	1.02791e-34	5.58317e-33
F13A1	9.95551	1.58755	-2.71908	1.16605e-34	6.31354e-33
MMP28	0.830185	37.8047	5.45376	1.27314e-34	6.87176e-33
IL10	8.93382	1.35308	-2.77383	1.34501e-34	7.23697e-33
EBF1	7.81959	1.23699	-2.70791	1.83276e-34	9.73966e-33
GPR39	0.0656882	4.45939	5.9401	1.93213e-34	1.02361e-32
CXADR	0.187036	8.80766	5.50635	1.99218e-34	1.05219e-32
ICAM4	0.618157	29.6268	5.50986	2.02041e-34	1.06384e-32
POU2AF1	168.879	27.333	-2.6756	2.75734e-34	1.44744e-32
ST6GALNAC2	0.840415	36.7311	5.39993	2.8614e-34	1.4975e-32
ZC3H12D	27.0234	4.36924	-2.67895	3.44578e-34	1.79243e-32
DMRTA2	0.0888414	5.16863	5.78667	3.74974e-34	1.94467e-32
AIM2	45.7324	7.37391	-2.68675	3.76889e-34	1.94873e-32
IRX3	0.548621	24.2467	5.41185	3.96731e-34	2.04518e-32
CD52	976.248	158.806	-2.66681	4.98636e-34	2.56284e-32
EWSAT1	0.0718187	4.62006	6.06226	5.49083e-34	2.81372e-32
CHRNA6	0.13782	7.44948	5.66434	5.61894e-34	2.87083e-32
PKP3	0.890085	36.9907	5.329	6.75438e-34	3.4205e-32
NCF1B	69.7018	11.2841	-2.6686	7.90406e-34	3.99097e-32
RLTPR	40.384	6.56711	-2.66328	8.38263e-34	4.22024e-32
FAM83F	0.0779501	5.24658	5.95868	8.81521e-34	4.42508e-32
CBLC	0.400556	18.5949	5.46793	9.01701e-34	4.50271e-32
BLNK	93.6749	15.3949	-2.66309	9.04221e-34	4.50271e-32
RCSD1	64.9217	10.6526	-2.6602	9.9531e-34	4.93869e-32
DHRS2	0.165657	9.13153	5.79259	1.17902e-33	5.83342e-32
ALDH3B2	0.332419	14.6828	5.37613	1.22473e-33	6.04222e-32
CLDN4	3.1073	122.654	5.25471	1.35043e-33	6.62441e-32
FAM84A	0.198681	8.44471	5.32331	1.45548e-33	7.11944e-32
DSC3	0.244321	10.1052	5.30267	1.49877e-33	7.31043e-32
PPP2R2C	0.130034	6.17054	5.44954	1.52867e-33	7.43521e-32
LINC00673	0.33431	14.8767	5.41766	1.75406e-33	8.50742e-32
PRODH	1.57586	62.1028	5.25568	1.83033e-33	8.8524e-32
NCF1C	106.652	17.5387	-2.64975	2.23605e-33	1.06945e-31
LINC00839	0.537694	22.2169	5.33713	2.45222e-33	1.16959e-31
DSG3	0.418313	16.7643	5.25496	2.83803e-33	1.34987e-31
LOC283710	30.2963	4.88093	-2.67984	2.96404e-33	1.40206e-31
NCF1	145.897	24.2277	-2.6396	3.83056e-33	1.80204e-31
PXK	28.6536	4.75	-2.64366	4.83904e-33	2.26409e-31
ZNF595	13.3564	2.21258	-2.65704	5.78227e-33	2.69808e-31
EDARADD	0.894475	34.4106	5.2048	5.93465e-33	2.7617e-31
FABP6	1.47836	61.0012	5.29817	7.02762e-33	3.2615e-31
PRSS8	0.89801	34.9188	5.22732	7.25577e-33	3.35833e-31
CD177	0.157057	7.77274	5.57094	7.71086e-33	3.5594e-31
COX6B2	0.776799	30.6253	5.24248	1.04345e-32	4.79096e-31
PERP	2.59971	93.7615	5.11278	1.19506e-32	5.45796e-31
PRKCB	39.7836	6.73105	-2.6196	1.3615e-32	6.18529e-31
RET	0.102339	4.53286	5.4128	1.36807e-32	6.19879e-31
FAM159A	15.6671	2.43312	-2.72023	1.44918e-32	6.5491e-31
LOC100130899	0.161279	6.78909	5.33165	1.53707e-32	6.92807e-31
SH3RF2	0.169433	7.36492	5.36728	1.55441e-32	6.98794e-31
PLEKHG6	0.129365	6.05193	5.51112	1.66229e-32	7.43412e-31
GHR	0.123635	5.41564	5.31586	2.103e-32	9.38069e-31
RHOH	61.6445	10.3963	-2.61678	2.19639e-32	9.76675e-31
LOC101929450	4.96926	0.786257	-2.70857	2.48831e-32	1.10138e-30
S100A14	3.8897	138.748	5.10391	2.605e-32	1.15007e-30
CNTNAP2	0.138481	5.21764	5.1433	3.37148e-32	1.48466e-30
LOC100131289	5.81216	0.849144	-2.80525	7.41893e-32	3.21761e-30
MCOLN2	26.9035	4.62565	-2.59797	1.03772e-31	4.48932e-30
HES2	0.177556	6.82369	5.19352	1.20425e-31	5.1967e-30
GBP6	0.136906	5.34727	5.2111	1.21307e-31	5.2124e-30
RIPK4	0.391866	13.8739	5.09136	1.21395e-31	5.2124e-30
GPX2	0.716277	27.0011	5.1887	1.21952e-31	5.22331e-30
DSP	3.00617	99.6778	4.98795	1.23713e-31	5.2856e-30
FGFBP1	0.525246	20.16	5.17801	1.27159e-31	5.41936e-30
WDFY4	33.8058	5.8501	-2.58092	1.5691e-31	6.66505e-30
LY6D	3.67316	122.434	5.00725	2.5098e-31	1.06176e-29
LINC01133	0.102948	6.2908	5.88857	2.77426e-31	1.1679e-29
FAM83H-AS1	0.406626	14.2738	5.08386	3.20498e-31	1.34594e-29
FAM65B	34.1865	5.95482	-2.57117	3.74679e-31	1.56583e-29
TREML2	5.91323	0.996034	-2.61383	3.83113e-31	1.5972e-29
LTA	32.7277	5.64179	-2.58689	3.93924e-31	1.6383e-29
CKMT1A	0.264635	10.2354	5.22552	4.1131e-31	1.70649e-29
EHF	1.11783	36.0099	4.95145	4.20866e-31	1.74194e-29
TSPEAR	0.138647	5.27296	5.20205	4.50661e-31	1.86079e-29
LCE1C	0.00681974	4.26521	9.39027	4.94579e-31	2.03238e-29
PTPRCAP	784.959	137.009	-2.56124	5.01703e-31	2.05674e-29
CHMP4C	0.171165	7.33542	5.32195	5.17071e-31	2.11471e-29
ALOX12B	0.089485	4.19507	5.36791	6.00153e-31	2.44868e-29
NTN1	0.521878	16.7624	4.94472	7.78318e-31	3.1532e-29
RASAL1	12.2063	2.11577	-2.57667	9.71274e-31	3.92568e-29
NEURL3	0.183953	7.93153	5.43215	1.32615e-30	5.34748e-29
CYP4X1	0.423038	14.1802	4.99598	1.41403e-30	5.6885e-29
GAS6-AS1	8.17359	1.32229	-2.66424	1.4871e-30	5.96851e-29
KRT8	13.4347	398.036	4.84295	2.0246e-30	8.08807e-29
RHOV	1.34167	41.448	4.90848	2.55165e-30	1.00999e-28
GLS2	0.284835	9.69542	5.02141	2.79923e-30	1.10544e-28
XG	0.216188	7.57378	5.08731	3.28275e-30	1.29047e-28
WFDC5	0.0877423	5.67075	5.83954	3.6139e-30	1.41741e-28
CAPNS2	0.205742	9.1781	5.36032	4.12256e-30	1.60958e-28
ACAA2	52.2182	9.35848	-2.53673	4.16705e-30	1.62326e-28
ERBB3	0.513153	15.3761	4.85529	4.585e-30	1.78205e-28
MAPRE2	42.1891	7.58589	-2.52877	5.11389e-30	1.98313e-28
CEL	0.698044	20.5308	4.88731	5.81208e-30	2.24882e-28
SDK2	0.180362	5.43291	4.84989	7.53354e-30	2.90185e-28
DDR1	4.05237	114.765	4.77169	7.69679e-30	2.95811e-28
IRX6	0.175688	6.25071	5.07529	8.78757e-30	3.36232e-28
INSM1	0.172483	5.87258	4.96917	1.30307e-29	4.97476e-28
DPEP2	12.7022	2.22681	-2.55116	1.34258e-29	5.11428e-28
IRX5	0.129454	5.01499	5.20863	1.35722e-29	5.15862e-28
ARHGEF16	0.334891	10.3615	4.89044	1.56734e-29	5.94415e-28
TSPAN33	61.2568	11.1327	-2.51088	1.60041e-29	6.05624e-28
MAP4K1	105.153	19.0648	-2.50809	1.62135e-29	6.12201e-28
PDE6G	7.3789	1.22896	-2.63074	2.13127e-29	7.9948e-28
ABCA13	0.146852	4.22465	4.77388	2.16708e-29	8.11146e-28
TOX2	20.0273	3.62145	-2.51632	2.89061e-29	1.07728e-27
SLC26A9	0.139297	4.38553	4.89053	2.90892e-29	1.08177e-27
SFTPD	0.0688886	4.00034	5.61704	4.72915e-29	1.74735e-27
SOSTDC1	0.0914937	4.0088	5.24258	4.9392e-29	1.82105e-27
PROM2	0.54365	14.9749	4.7317	5.60086e-29	2.06059e-27
FOXA1	0.461725	13.1139	4.75509	5.64135e-29	2.07106e-27
COL22A1	0.53668	14.4091	4.70861	6.80336e-29	2.49235e-27
PLEK2	0.414014	12.849	4.88971	7.93848e-29	2.88364e-27
HCAR2	0.377389	11.2719	4.8496	8.62947e-29	3.12804e-27
SERPINB5	0.441496	12.6227	4.7603	1.00147e-28	3.61497e-27
CXCL3	0.421917	13.4167	4.98269	1.26026e-28	4.5301e-27
CTSE	0.45441	12.9563	4.75801	1.58102e-28	5.64771e-27
SLC28A3	0.151799	4.44737	4.81996	1.68314e-28	5.98768e-27
KIAA1522	2.15294	54.4086	4.608	1.70569e-28	6.05537e-27
LAMB3	3.99737	101.14	4.60753	1.73063e-28	6.13127e-27
LOC100505549	15.3657	2.80625	-2.49879	1.85329e-28	6.53893e-27
LAT2	82.9659	15.5192	-2.47105	1.86769e-28	6.57625e-27
HSPA4L	0.246776	7.14375	4.78133	1.95446e-28	6.86774e-27
BLACAT1	0.131172	4.39182	5.06009	2.49922e-28	8.7285e-27
IL20RA	0.138314	4.30363	4.88378	2.50947e-28	8.74656e-27
CXCL8	0.513663	14.8161	4.81588	3.06095e-28	1.06257e-26
RHBDL3	0.136812	4.01084	4.82658	3.19965e-28	1.10626e-26
DKK1	0.153405	5.22067	5.05622	4.1875e-28	1.43913e-26
TTC24	4.64613	0.816755	-2.54729	7.02707e-28	2.38174e-26
GJB3	1.20575	30.1932	4.59019	7.83694e-28	2.64581e-26
SH2D4A	0.513478	13.0699	4.59721	8.58814e-28	2.89375e-26
UGT1A6	0.444952	11.7551	4.64478	1.06245e-27	3.56595e-26
TMPRSS4	1.49882	36.0325	4.5334	1.14957e-27	3.84335e-26
EPPK1	0.164758	4.05225	4.55145	1.44361e-27	4.78924e-26
EGFR	0.607671	14.85	4.53265	1.55202e-27	5.13899e-26
RASA4B	27.0601	5.14133	-2.43934	1.76413e-27	5.83009e-26
S1PR5	0.578688	14.489	4.58544	2.04695e-27	6.72604e-26
RASA4	65.2124	12.5586	-2.42543	2.27742e-27	7.45487e-26
LHX2	0.188939	5.43903	4.7599	2.5527e-27	8.32431e-26
KCNH3	0.570253	13.6864	4.53993	2.57977e-27	8.39668e-26
WNT4	0.377886	9.15535	4.58793	2.59171e-27	8.41964e-26
NOXO1	0.348621	9.51287	4.75277	2.73995e-27	8.85111e-26
NPPC	0.583218	16.9379	4.70798	2.81088e-27	9.04631e-26
PPAP2C	2.12963	50.052	4.50299	3.23616e-27	1.03762e-25
CD1A	0.343177	9.08515	4.65296	3.40612e-27	1.09009e-25
B4GALNT4	0.510801	12.1194	4.50013	3.85765e-27	1.22548e-25
PDZK1IP1	1.76988	42.2457	4.5427	3.89412e-27	1.23479e-25
TMPRSS2	0.298817	7.46413	4.58385	4.80765e-27	1.51608e-25
TUFT1	0.746494	17.4816	4.48495	5.36313e-27	1.68816e-25
2017-09-06	138.118	26.9693	-2.40914	5.72028e-27	1.79402e-25
CYP2U1	7.33907	1.41132	-2.43384	6.16922e-27	1.9313e-25
TNNT1	0.186408	6.08508	4.90403	6.91015e-27	2.15152e-25
SOX9	0.35128	8.37189	4.48931	7.74326e-27	2.40656e-25
SPINK5	1.05233	23.7113	4.4307	8.36102e-27	2.59388e-25
GGT6	0.396542	9.61359	4.52923	9.57294e-27	2.96451e-25
AKR1C2	0.746418	16.7265	4.44647	1.00489e-26	3.10631e-25
CYP2J2	0.173814	5.11216	4.79363	1.07806e-26	3.32059e-25
ITGB8	0.249392	5.70588	4.44411	1.08318e-26	3.32624e-25
CKMT1B	0.38923	9.63652	4.58164	1.13515e-26	3.47159e-25
LRP4	0.201204	4.58623	4.46176	1.56429e-26	4.75025e-25
MDK	14.2936	302.644	4.36197	1.68147e-26	5.09711e-25
ATP2A3	171.245	33.6562	-2.38928	1.70396e-26	5.15619e-25
MUC15	0.163022	4.17603	4.5775	1.95276e-26	5.8781e-25
TNS4	1.05125	22.7446	4.38364	2.07497e-26	6.22418e-25
GABRE	1.64583	35.0642	4.37497	2.28274e-26	6.80004e-25
DEFB4A	1.05905	26.8652	4.60117	2.30487e-26	6.85409e-25
MAOA	0.299703	6.70065	4.42055	3.06676e-26	9.04035e-25
PTPRF	5.20811	108.615	4.32838	3.07156e-26	9.04035e-25
GPC1	2.78307	57.3442	4.3269	3.36597e-26	9.87312e-25
CALML5	1.93018	42.4444	4.37258	3.67063e-26	1.07485e-24
C2orf54	0.347299	8.22409	4.47008	3.94213e-26	1.15239e-24
AP1M2	0.568257	12.9895	4.44413	4.53875e-26	1.32007e-24
KIT	0.777552	16.2318	4.3397	4.73191e-26	1.37393e-24
KLF5	1.3375	27.9958	4.33079	5.78252e-26	1.67334e-24
LRIG3	1.27099	26.234	4.30156	8.53371e-26	2.44889e-24
TNFRSF13C	34.5615	6.78094	-2.38488	8.68212e-26	2.48733e-24
PTN	0.872184	18.7774	4.37899	8.88334e-26	2.54075e-24
ARHGAP25	99.2742	20.088	-2.36126	9.46961e-26	2.69947e-24
PVRL4	0.797498	16.5235	4.32797	1.00334e-25	2.85075e-24
P2RX5-TAX1BP3	4.05495	0.792292	-2.39197	1.09192e-25	3.09731e-24
AMTN	0.152224	5.27827	5.18293	1.123e-25	3.1698e-24
FCGBP	0.918716	18.2027	4.25494	1.19966e-25	3.37511e-24
FAM83H	1.14017	22.7347	4.27127	1.4006e-25	3.93402e-24
IGSF3	0.565698	11.5137	4.28444	1.50308e-25	4.20627e-24
GRAP	36.4925	7.30957	-2.36193	1.50486e-25	4.20627e-24
MEF2C	19.2532	3.899	-2.35166	2.05248e-25	5.68159e-24
SEZ6L2	0.387616	8.16384	4.32851	2.08218e-25	5.75457e-24
VSNL1	0.316587	7.25883	4.46013	2.08676e-25	5.758e-24
CREB3L1	0.87281	17.6067	4.29434	2.18382e-25	6.01615e-24
TNFRSF11A	0.226734	4.89075	4.33935	2.21026e-25	6.06959e-24
KRT18	9.61284	185.5	4.2227	2.27661e-25	6.24182e-24
FAIM3	68.01	13.8544	-2.34	3.33059e-25	9.08814e-24
TFAP2A	0.719277	14.2816	4.25867	3.67662e-25	1.00165e-23
CCDC69	81.5502	16.7356	-2.33423	4.33473e-25	1.17721e-23
CPNE5	41.1123	8.34963	-2.33662	4.46518e-25	1.21073e-23
IL16	66.7079	13.7381	-2.32848	5.61554e-25	1.51787e-23
ZNF683	0.354988	7.87551	4.44152	6.10162e-25	1.64667e-23
KITLG	0.754853	14.5952	4.19809	6.75075e-25	1.81616e-23
BIK	52.7543	10.7151	-2.3408	6.95087e-25	1.86708e-23
ADGRA3	0.596974	11.5012	4.20659	7.87883e-25	2.10648e-23
WNT3	7.15592	1.44471	-2.35661	8.18635e-25	2.18531e-23
FAM83E	0.294259	6.41982	4.38456	8.43924e-25	2.24585e-23
LAD1	2.4292	45.3383	4.17084	9.3414e-25	2.47828e-23
MISP	0.50739	9.87183	4.22399	1.28356e-24	3.37927e-23
STAP2	4.22703	77.4875	4.14958	1.31862e-24	3.46626e-23
FOXP1	30.5724	6.36393	-2.31345	1.46166e-24	3.83056e-23
IL1R2	1.73714	32.276	4.1543	1.91995e-24	4.99361e-23
EDN2	0.199378	5.17343	4.77699	1.98527e-24	5.15571e-23
EPHX3	0.735	13.9298	4.20436	2.43989e-24	6.29834e-23
DLX5	0.257616	5.92853	4.4102	2.72416e-24	7.02163e-23
SEMA7A	42.3141	8.86632	-2.3007	3.15992e-24	8.12052e-23
EVPL	0.664328	11.9011	4.11159	3.1985e-24	8.20743e-23
DLG5	1.33354	23.2222	4.07311	3.60375e-24	9.20613e-23
KLK11	0.319331	7.08721	4.39846	3.91015e-24	9.95932e-23
NPNT	0.509039	9.34989	4.13497	4.09061e-24	1.03729e-22
CSAG3	1.42526	26.8642	4.20179	4.18232e-24	1.05743e-22
TBC1D1	40.0383	8.47082	-2.29193	4.6311e-24	1.16237e-22
STAR	0.583394	10.6513	4.13207	5.35412e-24	1.33799e-22
MYH14	1.22563	20.9635	4.04494	5.90672e-24	1.46756e-22
ADRA2A	6.42428	1.3277	-2.31302	6.0205e-24	1.49367e-22
FHOD3	0.751351	13.221	4.07842	6.29215e-24	1.55882e-22
IFI44L	1.56558	26.8662	4.04604	6.40523e-24	1.58456e-22
EFS	0.876061	15.6012	4.0904	6.89785e-24	1.70154e-22
TMEM30B	0.280576	5.25273	4.13792	7.15087e-24	1.76143e-22
STEAP3	2.00545	33.8173	4.04435	9.03753e-24	2.21349e-22
PARP15	35.0589	7.47567	-2.28722	9.19847e-24	2.24866e-22
GTF2IRD1	0.588331	10.3939	4.09832	9.20726e-24	2.24866e-22
AFAP1-AS1	0.700832	12.0816	4.05999	9.5819e-24	2.33684e-22
PIK3AP1	32.5707	7.01043	-2.27865	1.01001e-23	2.45627e-22
GPRC5C	0.804306	14.3196	4.10238	1.08278e-23	2.61844e-22
LOC102723649	0.155262	5.99404	5.30574	1.08886e-23	2.62946e-22
LOC653602	0.256865	5.25994	4.26614	1.10246e-23	2.65857e-22
TFAP2C	0.30016	5.69183	4.2069	1.22524e-23	2.94639e-22
TNNT2	0.370346	7.68174	4.38823	1.52785e-23	3.64356e-22
APBB1IP	50.0117	10.8131	-2.2686	1.81342e-23	4.31264e-22
CYP4F12	0.703625	12.2845	4.07171	2.28306e-23	5.42204e-22
WNT5A	0.624196	10.4627	4.00386	3.05343e-23	7.21178e-22
SLC6A8	1.53965	25.4506	3.98526	3.10434e-23	7.322e-22
AKR1C1	2.60799	42.172	3.98883	3.32503e-23	7.81366e-22
SDC1	6.03498	96.5146	3.94772	3.32641e-23	7.81366e-22
STC2	0.430238	7.20808	4.01638	3.71557e-23	8.70404e-22
TJP3	0.755527	12.4944	4.00748	3.73061e-23	8.72741e-22
PCSK6	0.476607	7.94398	4.01637	4.33572e-23	1.01292e-21
RAP1GAP	0.21988	4.00941	4.08448	4.42155e-23	1.03158e-21
SLC7A2	0.41798	6.85983	3.98332	4.5076e-23	1.04881e-21
ZNF750	0.28605	5.11222	4.09439	4.62549e-23	1.07479e-21
BCAS4	48.619	10.4939	-2.25592	5.00485e-23	1.15825e-21
TMEM40	0.430671	7.6252	4.08156	5.6708e-23	1.30709e-21
PKN3	10.2464	2.19663	-2.26514	6.19577e-23	1.42619e-21
KCNS3	0.723938	12.0511	4.00183	6.67639e-23	1.53272e-21
JUP	10.8827	169.441	3.90875	6.97993e-23	1.59602e-21
SOX4	3.98978	61.5421	3.90149	8.0822e-23	1.8383e-21
MPP3	0.299659	5.22447	4.09272	8.50097e-23	1.931e-21
VPREB3	63.517	13.6882	-2.25218	8.61983e-23	1.95542e-21
TESPA1	14.7227	3.2186	-2.24709	8.78512e-23	1.99029e-21
C1orf106	0.504656	8.18272	3.96235	9.01894e-23	2.0379e-21
CORO1A	684.961	150.368	-2.2323	9.13861e-23	2.06224e-21
SFN	11.66	178.162	3.88474	1.12541e-22	2.52967e-21
SCNN1B	0.269287	4.75358	4.05635	1.17887e-22	2.64295e-21
LYL1	20.1332	4.35057	-2.24686	1.20492e-22	2.69782e-21
TACC2	0.587806	9.27323	3.92858	1.23188e-22	2.75104e-21
NAV2	0.774687	12.0052	3.89216	1.38454e-22	3.076e-21
KRT16	11.5288	171.434	3.86986	1.39287e-22	3.09052e-21
FCER1A	0.254843	5.25209	4.23132	1.41164e-22	3.12666e-21
TCF4	48.7532	10.8348	-2.22433	1.50205e-22	3.31567e-21
MDFIC	16.5514	3.67315	-2.2303	1.64468e-22	3.62123e-21
CDH1	2.4869	37.2657	3.8485	2.11634e-22	4.64784e-21
GRHL3	0.233431	4.04562	4.04836	2.25007e-22	4.93525e-21
PKDCC	2.01326	30.7195	3.87442	2.39908e-22	5.25539e-21
SLA	90.784	20.3639	-2.21205	2.93846e-22	6.38817e-21
KIAA0922	44.7619	10.0844	-2.20894	3.54427e-22	7.68579e-21
ABCA3	3.06039	44.4268	3.81814	3.62039e-22	7.83114e-21
HENMT1	15.2142	3.358	-2.23514	3.75716e-22	8.08635e-21
TMEM132A	2.44974	35.7145	3.81937	4.10815e-22	8.83072e-21
SIGLEC10	50.912	11.5064	-2.20366	4.91099e-22	1.05171e-20
SYNPO2	1.833	26.6609	3.80251	4.93257e-22	1.05502e-20
TMEM156	15.141	3.34992	-2.22419	5.16017e-22	1.10233e-20
BCYRN1	3.01442	49.5259	4.0215	5.38147e-22	1.14676e-20
TMC4	1.13137	16.8113	3.84977	5.98784e-22	1.26969e-20
RSAD2	0.824347	12.2177	3.83532	7.50989e-22	1.58268e-20
LIMD2	128.555	29.0297	-2.19204	7.69911e-22	1.62058e-20
CYP4B1	1.06382	15.5821	3.83611	7.82081e-22	1.64418e-20
SLAMF6	38.6311	8.74586	-2.19597	8.30825e-22	1.7424e-20
MAP7	0.338333	5.17284	3.85796	8.52688e-22	1.78391e-20
HHEX	16.1131	3.60842	-2.21117	9.84535e-22	2.04979e-20
NOV	0.620604	9.41627	3.84478	1.03053e-21	2.14037e-20
LBH	133.49	30.3712	-2.1862	1.03453e-21	2.1461e-20
DUOX2	0.356996	5.20995	3.83686	1.06817e-21	2.2079e-20
AJUBA	1.08313	15.7039	3.79461	1.13913e-21	2.34892e-20
ULBP2	0.342141	5.98481	4.04387	1.15151e-21	2.37161e-20
USP18	2.9242	41.684	3.77688	1.16258e-21	2.39154e-20
HR	0.535141	7.74373	3.80856	1.21303e-21	2.49236e-20
UNQ6494	0.256961	4.29664	3.98936	1.23012e-21	2.52146e-20
ARHGEF4	0.431855	6.40604	3.85068	1.42545e-21	2.91144e-20
BASP1	89.3534	20.4822	-2.18167	1.50519e-21	3.06702e-20
IKZF3	54.6905	12.5335	-2.17673	1.63937e-21	3.33255e-20
IFNLR1	9.73448	2.20014	-2.18688	2.27103e-21	4.58951e-20
CXCL2	0.54449	8.58537	3.94567	2.37597e-21	4.79596e-20
CCND1	6.9479	94.1491	3.71197	2.48741e-21	5.01501e-20
LAMP3	2.03323	28.2546	3.73282	2.5758e-21	5.18108e-20
PCED1B	54.2186	12.4213	-2.17255	2.6255e-21	5.27489e-20
FAM222A	0.528662	7.61194	3.79393	2.63662e-21	5.29107e-20
C4orf32	6.76315	1.5224	-2.20997	2.66949e-21	5.34458e-20
KREMEN1	2.42723	32.8979	3.71056	2.67523e-21	5.34984e-20
PLBD1	27.0174	6.24692	-2.17875	3.09412e-21	6.16604e-20
PTPN3	0.521024	7.27425	3.7428	3.1376e-21	6.24546e-20
WNT7B	0.457404	6.54255	3.77548	3.26628e-21	6.49409e-20
AGMAT	5.54992	1.23191	-2.20915	3.27436e-21	6.50264e-20
ANKRD22	1.14892	15.8717	3.73124	3.44204e-21	6.81991e-20
CCDC88A	25.8507	5.99989	-2.1628	3.54442e-21	7.01469e-20
ARHGEF28	0.521077	7.22722	3.74533	3.72574e-21	7.36507e-20
NUDT17	6.64418	1.44382	-2.24537	3.74583e-21	7.3963e-20
CYFIP2	58.8764	13.6721	-2.15849	4.16225e-21	8.18101e-20
LGR4	0.4425	6.2501	3.74916	4.41108e-21	8.65034e-20
CLDN3	1.26955	17.9024	3.76054	4.66894e-21	9.14559e-20
SAA1	15.3921	201.242	3.68453	4.73879e-21	9.27188e-20
ESRP2	0.92137	12.5254	3.71936	4.99005e-21	9.75241e-20
LOC100506302	11.7153	2.6328	-2.20348	5.29013e-21	1.03038e-19
CYP3A5	0.335992	5.14042	3.93072	5.3429e-21	1.03948e-19
FGR	56.723	13.2251	-2.15642	5.38706e-21	1.04673e-19
TUBA4A	130.002	30.1588	-2.15282	5.7598e-21	1.11555e-19
CFAP57	0.340305	4.86985	3.77797	6.44605e-21	1.24706e-19
INPP1	5.07689	66.4346	3.65915	6.55077e-21	1.26589e-19
PARD3	0.927648	12.4058	3.68034	7.42873e-21	1.43234e-19
VSTM2L	0.7053	9.82995	3.74444	7.51037e-21	1.44646e-19
IFI44	4.31176	57.1091	3.67039	7.71631e-21	1.48446e-19
CXCL6	0.436223	6.4617	3.8841	8.79372e-21	1.68421e-19
CACNA2D1	0.315842	4.33612	3.70695	8.80736e-21	1.68495e-19
MPZL2	1.66436	22.4752	3.68538	8.88376e-21	1.69768e-19
LILRB1	46.4773	10.9204	-2.14596	9.05395e-21	1.72644e-19
GRHPR	417.91	97.936	-2.14152	9.3627e-21	1.78326e-19
CLDN7	2.99646	39.3297	3.66668	9.82266e-21	1.86468e-19
VLDLR	0.535382	7.3394	3.70786	1.08834e-20	2.0615e-19
NRARP	0.943378	12.754	3.68559	1.22187e-20	2.30681e-19
CELSR2	1.20351	15.3357	3.61397	1.48972e-20	2.80022e-19
TRPV4	0.853802	11.2444	3.67465	1.5049e-20	2.82567e-19
NHSL1	0.495623	6.50505	3.65766	1.50807e-20	2.82854e-19
IFIT1	1.03343	13.4187	3.64358	1.52168e-20	2.84477e-19
AGRN	3.80022	47.9535	3.60662	1.66026e-20	3.09711e-19
C16orf87	14.0161	3.24884	-2.16767	1.73138e-20	3.22279e-19
FBXO10	14.7437	3.47412	-2.13826	1.81642e-20	3.37745e-19
ICAM5	0.940811	12.2223	3.65935	2.06087e-20	3.82372e-19
CCNJL	0.440088	5.94845	3.70595	2.108e-20	3.90274e-19
TRIM16L	1.44415	18.6176	3.64841	2.11629e-20	3.90969e-19
LINC00926	24.2	5.66932	-2.13003	2.7187e-20	4.99724e-19
KLHL18	15.7665	3.72852	-2.12891	2.71949e-20	4.99724e-19
KIAA0040	45.3529	10.8614	-2.12117	2.79891e-20	5.13223e-19
PALM	0.93583	11.7989	3.59616	4.86216e-20	8.83088e-19
ELF3	3.11914	37.443	3.55104	5.07659e-20	9.20578e-19
DOC2B	1.09184	13.8906	3.60566	5.24149e-20	9.47984e-19
DQX1	0.388506	5.17973	3.67206	6.04308e-20	1.08725e-18
DUS2	29.3468	6.99828	-2.11131	6.29884e-20	1.1309e-18
IL23A	1.44278	18.4722	3.62043	6.9013e-20	1.23778e-18
LAPTM4B	4.32845	51.7996	3.52522	7.55168e-20	1.35021e-18
SH2D3C	51.6286	12.4447	-2.09905	8.48804e-20	1.51448e-18
SYK	106.475	25.8992	-2.09345	9.4307e-20	1.67573e-18
KCTD1	1.79247	21.6487	3.54191	1.04397e-19	1.84437e-18
PTPRS	1.91438	22.4745	3.5037	1.04441e-19	1.84437e-18
ANGPTL6	5.43099	1.24965	-2.15489	1.14464e-19	2.01311e-18
PBX1	1.14393	13.6237	3.51478	1.17085e-19	2.05501e-18
RGMA	0.889484	10.7115	3.54243	1.30183e-19	2.28025e-18
COLCA1	1.66044	19.5271	3.49617	1.30434e-19	2.28233e-18
FSTL3	2.89696	34.9676	3.51725	1.31142e-19	2.29238e-18
TCEA3	1.25392	15.1525	3.54751	1.38606e-19	2.41551e-18
BAIAP2L1	1.43382	16.9052	3.50756	1.48676e-19	2.58055e-18
LY86	40.5161	9.78841	-2.1012	1.57986e-19	2.73662e-18
NEIL1	12.4997	2.96751	-2.11234	1.59436e-19	2.75896e-18
IFIT3	4.57944	52.946	3.48059	1.6797e-19	2.90372e-18
EVA1A	0.320809	4.3979	3.76645	1.73271e-19	2.99236e-18
RAB30	8.2606	2.0287	-2.08427	2.07702e-19	3.56907e-18
LOC101928100	0.371506	4.71519	3.58759	2.33552e-19	4.00129e-18
PIR	1.38038	16.561	3.5313	2.45408e-19	4.20024e-18
TACSTD2	7.11697	80.7157	3.45378	2.57709e-19	4.40639e-18
ANK3	0.539121	6.27631	3.47738	2.72241e-19	4.64104e-18
TINCR	0.364742	4.41904	3.54871	3.03193e-19	5.15339e-18
GJB2	2.05506	24.0429	3.47124	3.30358e-19	5.59302e-18
TP63	2.75409	31.1083	3.43053	4.05407e-19	6.83004e-18
TIMP3	27.7387	6.84547	-2.06484	4.25846e-19	7.16037e-18
PSD3	0.45047	5.16466	3.45203	4.37563e-19	7.35021e-18
MMP11	2.66954	30.1703	3.44755	4.61921e-19	7.74427e-18
TESC	43.0475	10.4648	-2.07279	4.82351e-19	8.07105e-18
CCDC109B	36.0079	8.8994	-2.07113	4.99471e-19	8.34131e-18
IGFBP2	11.7704	128.967	3.41007	5.54958e-19	9.25899e-18
ZNF107	29.103	7.30818	-2.05828	5.80196e-19	9.66133e-18
FJX1	1.02699	11.6951	3.45499	6.39458e-19	1.06173e-17
TAGAP	31.9797	7.99323	-2.05631	6.72962e-19	1.11521e-17
SHCBP1	12.3076	3.05882	-2.06617	7.41988e-19	1.22371e-17
CXCL10	13.5332	148.045	3.39536	7.53912e-19	1.24219e-17
VOPP1	254.558	63.9372	-2.04796	7.73386e-19	1.27306e-17
RBP5	31.6367	7.73931	-2.06561	9.69377e-19	1.58808e-17
CDC42EP4	8.04926	86.5392	3.3763	9.86555e-19	1.61469e-17
ARHGAP15	41.6999	10.4505	-2.05052	1.00362e-18	1.64106e-17
ST5	3.71805	40.0236	3.3772	1.02864e-18	1.68037e-17
BMP2	0.490534	5.65422	3.46691	1.02968e-18	1.68048e-17
TMEM154	11.9442	2.97593	-2.05622	1.10866e-18	1.80595e-17
C8orf4	4.53262	48.1966	3.36763	1.28353e-18	2.08096e-17
PADI2	0.549629	6.02951	3.42322	1.3014e-18	2.10796e-17
MYBL2	119.96	30.2787	-2.0369	1.34857e-18	2.17934e-17
ATP1B1	5.68473	60.5455	3.36419	1.37099e-18	2.21235e-17
PACSIN3	1.49478	16.4496	3.41036	1.44905e-18	2.33523e-17
GPT2	16.6484	4.16803	-2.04405	1.44986e-18	2.33523e-17
SEMA3F	2.95067	31.2196	3.35805	1.49821e-18	2.41085e-17
INPP5J	0.40811	4.68271	3.48137	1.58785e-18	2.55033e-17
MFAP4	50.8674	12.83	-2.03624	1.7655e-18	2.82251e-17
MYCL	1.27142	13.7707	3.3795	1.77798e-18	2.83719e-17
LOC100131564	33.6784	8.53274	-2.03204	1.9715e-18	3.13438e-17
ITGB4	4.8695	50.9682	3.33414	2.09503e-18	3.32158e-17
ITGA2	0.853553	9.19332	3.35943	2.14773e-18	3.40199e-17
EAF2	32.8261	8.23216	-2.04401	2.17015e-18	3.43434e-17
UCP2	363.039	92.372	-2.02518	2.19185e-18	3.46232e-17
ASB9	0.413347	4.96039	3.55734	2.223e-18	3.50831e-17
TMEM125	0.40533	4.80827	3.52934	2.34677e-18	3.69685e-17
KREMEN2	4.51309	46.8555	3.32953	2.40837e-18	3.78698e-17
GJA1	4.82719	50.6369	3.3265	2.47448e-18	3.88737e-17
ITGA3	3.65292	37.8179	3.32522	2.51336e-18	3.94485e-17
JAG2	1.92166	19.8618	3.32404	2.65789e-18	4.1679e-17
TMEM178B	0.839577	8.74264	3.32073	2.80017e-18	4.38303e-17
CEACAM19	0.64013	7.12254	3.42985	2.83337e-18	4.43096e-17
TNFAIP6	0.593535	6.95869	3.55938	2.88266e-18	4.49988e-17
BTLA	6.08726	1.52122	-2.05149	2.89942e-18	4.52194e-17
PAMR1	0.628254	6.85207	3.39601	2.95107e-18	4.59833e-17
FGD2	48.4886	12.3457	-2.02162	2.99026e-18	4.65097e-17
CD27	186.064	47.4175	-2.01906	3.08806e-18	4.79876e-17
ITPRIPL1	7.49144	1.86592	-2.06276	3.15594e-18	4.89962e-17
PVRIG	37.4739	9.5034	-2.02345	3.7114e-18	5.73635e-17
SH2B2	21.0731	5.33035	-2.0257	3.8824e-18	5.99526e-17
FZD7	1.2106	12.6155	3.32077	4.44875e-18	6.84527e-17
VNN2	23.1419	5.90348	-2.02074	4.77381e-18	7.31927e-17
BAIAP2	2.02411	20.5384	3.29635	5.59115e-18	8.53443e-17
FAM71E1	0.359697	4.40706	3.56368	5.61904e-18	8.5694e-17
ENAH	0.722431	7.34616	3.28244	5.77066e-18	8.77732e-17
ASS1	6.43887	64.0012	3.28089	5.79684e-18	8.80935e-17
COL7A1	4.41037	43.993	3.27404	6.07883e-18	9.22161e-17
LIMCH1	0.73739	7.587	3.30275	6.35292e-18	9.62892e-17
PTGFRN	1.71584	17.3716	3.27292	6.58086e-18	9.96563e-17
PTPN14	0.594063	5.93865	3.27075	7.14545e-18	1.07719e-16
EGFL6	0.691215	7.35018	3.37331	7.20965e-18	1.0851e-16
DSC2	1.1528	11.7706	3.28426	7.95562e-18	1.1932e-16
SIGLEC5	8.71205	2.22177	-2.02233	8.15483e-18	1.22202e-16
RAB25	7.86917	77.9302	3.2678	8.39335e-18	1.25558e-16
PTPN18	74.3886	19.3417	-1.9963	8.55216e-18	1.27822e-16
ADPRH	14.0056	3.62919	-2.00653	8.63274e-18	1.28915e-16
SASH3	138.186	35.9391	-1.99497	8.66645e-18	1.29306e-16
HLA-DOB	89.676	23.2156	-1.99876	8.73732e-18	1.3025e-16
CAMK4	5.53992	1.39597	-2.04627	8.74822e-18	1.303e-16
PPL	1.39637	13.8675	3.25563	8.84411e-18	1.31614e-16
FAT1	0.855696	8.58018	3.25507	9.0267e-18	1.341e-16
LPAR3	0.376351	4.37026	3.45808	9.18091e-18	1.36273e-16
C22orf34	4.94627	1.21012	-2.0719	9.24105e-18	1.37048e-16
ZSCAN16-AS1	6.06811	1.51078	-2.05234	9.25104e-18	1.37078e-16
TUSC3	1.05942	10.7365	3.28395	9.4475e-18	1.39869e-16
PTPN6	251.326	65.2642	-1.99222	9.51993e-18	1.4082e-16
KRT17	56.0291	552.942	3.24116	1.0415e-17	1.53796e-16
GRTP1	0.828504	8.77096	3.36223	1.09354e-17	1.61204e-16
COLCA2	1.91657	19.5409	3.30189	1.22441e-17	1.80033e-16
LINC01315	0.376104	4.71379	3.57871	1.26035e-17	1.8516e-16
LINC00958	0.548164	6.01193	3.41275	1.29263e-17	1.8974e-16
GNA15	3.68832	36.0103	3.23627	1.30967e-17	1.92077e-16
PKP2	0.792684	8.01216	3.26235	1.33001e-17	1.94895e-16
OASL	2.85133	27.942	3.24946	1.34766e-17	1.97313e-16
IRF4	51.2033	13.4289	-1.98534	1.3681e-17	1.99965e-16
TTC39A	0.422264	4.5192	3.37255	1.39973e-17	2.04241e-16
LAMA3	2.82163	27.4252	3.22418	1.44229e-17	2.10097e-16
CNKSR3	0.534289	5.55747	3.30829	1.47602e-17	2.14827e-16
CD1C	7.5326	1.9268	-2.01202	1.6249e-17	2.36097e-16
RHBDL2	0.512686	5.45949	3.37733	1.93566e-17	2.8054e-16
MECOM	1.24739	12.1739	3.22901	1.95921e-17	2.83714e-16
PLEKHA2	29.8099	7.86722	-1.97791	2.0195e-17	2.922e-16
FAM64A	0.543528	5.85074	3.35232	2.05215e-17	2.96675e-16
CHAC1	0.795873	8.13163	3.29894	2.08246e-17	3.00552e-16
ABI3BP	15.1198	4.00344	-1.98265	2.16103e-17	3.1163e-16
MTL5	0.473288	4.81676	3.27704	2.19649e-17	3.15949e-16
IL1RN	2.83692	27.7515	3.2306	2.27807e-17	3.27137e-16
PLXNB1	2.65213	24.9682	3.19497	2.42864e-17	3.4789e-16
SPINT1	7.24175	68.4559	3.19277	2.55068e-17	3.65067e-16
BZRAP1-AS1	14.0444	3.66038	-1.98588	2.69874e-17	3.85938e-16
ZC4H2	4.75234	1.21462	-2.01444	2.70618e-17	3.8636e-16
L3MBTL4	0.46802	4.69633	3.26562	2.7597e-17	3.93674e-16
NMNAT3	0.919619	9.21691	3.26483	2.84852e-17	4.06008e-16
PHLDA3	5.23432	49.1059	3.19308	2.8646e-17	4.07962e-16
FLVCR1-AS1	10.5575	2.66607	-2.03349	2.99091e-17	4.24547e-16
NUP210	76.9308	20.424	-1.96331	3.36955e-17	4.77112e-16
EPHB4	3.74322	35.0613	3.17734	3.38668e-17	4.79145e-16
MARVELD3	0.587282	5.87877	3.27343	3.71816e-17	5.24748e-16
LYPD3	2.38303	22.6655	3.20297	3.75471e-17	5.29473e-16
CCL14	20.3817	5.17513	-2.01821	4.10437e-17	5.76419e-16
CD53	318.193	85.3958	-1.95854	4.15497e-17	5.83051e-16
TMED8	4.88782	1.2129	-2.06337	4.2176e-17	5.90876e-16
COL4A5	1.24611	11.6822	3.163	4.24388e-17	5.94074e-16
TLR5	0.849716	8.17168	3.2044	4.28251e-17	5.98994e-16
HEY1	0.951177	9.3469	3.22451	4.46341e-17	6.23284e-16
PPP1R16B	42.2229	11.2974	-1.95731	4.58666e-17	6.39977e-16
MST1R	1.63182	15.2172	3.17487	4.80839e-17	6.69287e-16
B3GNT3	0.435001	4.34039	3.26216	4.88606e-17	6.7955e-16
NINJ2	20.2659	5.30449	-1.98419	5.15551e-17	7.13566e-16
FBXO27	0.910298	8.76214	3.21632	5.5381e-17	7.6345e-16
C17orf97	0.38317	4.04323	3.33906	5.67074e-17	7.81111e-16
MYO10	0.76642	7.06811	3.14996	5.89105e-17	8.10642e-16
RAMP1	3.38141	31.6975	3.18146	6.17672e-17	8.47031e-16
ACPP	7.3933	1.95414	-1.98168	6.35288e-17	8.68816e-16
PTPN13	1.29453	11.8525	3.13927	6.46095e-17	8.82893e-16
PLA2G2A	0.754394	7.69127	3.31214	6.68012e-17	9.12119e-16
STAMBPL1	26.7749	7.15922	-1.95585	7.11885e-17	9.69717e-16
FAM84B	0.637482	5.98339	3.16543	7.2228e-17	9.831e-16
AMIGO2	11.2025	2.99347	-1.96101	7.36223e-17	1.00036e-15
CTNND1	9.19846	84.1186	3.12859	7.45355e-17	1.01131e-15
KRTCAP3	2.49205	23.3703	3.1932	8.24874e-17	1.11744e-15
EHD3	14.82	3.96366	-1.95115	8.66037e-17	1.17136e-15
IDO1	9.46259	84.7502	3.1217	8.77582e-17	1.18604e-15
KAZN	0.632673	5.92412	3.17629	8.95549e-17	1.20748e-15
AGAP1	0.604042	5.54007	3.13787	9.02628e-17	1.21608e-15
PLEKHA5	0.962989	8.94935	3.15369	9.10531e-17	1.22576e-15
WAS	63.8996	17.1948	-1.94406	9.15462e-17	1.23144e-15
CYB561A3	155.765	42.0014	-1.9379	1.02067e-16	1.36975e-15
DLGAP1-AS1	25.2448	6.69376	-1.9637	1.04947e-16	1.4073e-15
RNF43	1.49845	13.3903	3.11053	1.09186e-16	1.46073e-15
CSK	208.102	56.2177	-1.93355	1.20337e-16	1.60369e-15
ZNF667-AS1	5.73154	1.45707	-2.01694	1.20552e-16	1.60531e-15
OGG1	28.5366	7.66559	-1.94451	1.22171e-16	1.62561e-15
PTK7	3.13901	27.9935	3.10091	1.3219e-16	1.7535e-15
SLC25A19	50.7307	13.7005	-1.93693	1.39316e-16	1.84518e-15
PDLIM4	4.3712	38.5986	3.09514	1.44784e-16	1.91614e-15
PPP1R3E	13.9526	3.77361	-1.93848	1.46209e-16	1.93351e-15
JAG1	2.13517	19.1632	3.09256	1.50746e-16	1.98893e-15
GSTA4	1.81744	16.5983	3.14306	1.68864e-16	2.22456e-15
OVOL2	0.464978	4.6316	3.24106	1.77768e-16	2.33649e-15
LOC606724	14.7004	3.7876	-1.99495	1.83643e-16	2.41003e-15
KCNIP2	6.42236	1.68136	-1.97759	1.84838e-16	2.42387e-15
PC	0.884463	7.91009	3.1159	1.91303e-16	2.50674e-15
CCDC64B	0.556749	5.27887	3.21002	1.95056e-16	2.55397e-15
ETNK2	0.762394	6.9527	3.14765	2.01807e-16	2.63636e-15
VANGL2	3.4554	30.0652	3.07403	2.02518e-16	2.64364e-15
KIAA1671	1.21444	10.6577	3.07244	2.03719e-16	2.65729e-15
EFNB1	3.33471	28.8971	3.0728	2.168e-16	2.82365e-15
SEMA3B	0.44628	4.18028	3.18463	2.18061e-16	2.83792e-15
ORM2	0.385716	4.42229	3.59772	2.22169e-16	2.88703e-15
MLF1	0.674907	6.25018	3.15645	2.2543e-16	2.92718e-15
FAM189A2	0.413919	4.06786	3.22005	2.37744e-16	3.08244e-15
P2RY8	26.54	7.2434	-1.91959	2.54747e-16	3.30041e-15
LYPD6B	0.84584	7.88251	3.13426	2.56484e-16	3.31792e-15
TSPAN9	2.52914	21.9249	3.06237	2.58631e-16	3.34317e-15
GPR161	0.572028	5.02499	3.09235	2.66393e-16	3.44093e-15
SH3BP4	1.26728	11.1655	3.07684	2.70107e-16	3.48629e-15
FOXD2-AS1	4.53593	1.19841	-1.97194	2.87906e-16	3.70491e-15
LZTS1	0.479994	4.27134	3.1061	3.26766e-16	4.19244e-15
MTUS1	2.09295	17.9695	3.0405	3.71655e-16	4.75067e-15
CGN	0.604806	5.3196	3.08331	3.73661e-16	4.76924e-15
APBB1	18.0946	4.94731	-1.9162	4.31137e-16	5.47442e-15
SNAI2	1.58652	14.0294	3.07554	4.31793e-16	5.47872e-15
UPK3B	0.924192	8.29104	3.12935	4.37571e-16	5.54794e-15
LOC101926963	9.85649	2.61086	-1.96284	4.71601e-16	5.96184e-15
CPT1C	1.21653	10.3724	3.0605	4.91583e-16	6.20079e-15
C11orf52	0.390774	4.05885	3.30644	5.29307e-16	6.662e-15
LURAP1L	0.913274	8.0086	3.07672	5.30354e-16	6.6703e-15
NYNRIN	0.929556	7.93284	3.03404	5.32694e-16	6.69484e-15
KMT2E-AS1	9.7516	2.66745	-1.91534	5.42313e-16	6.81075e-15
FGFR2	1.16839	10.0667	3.03835	5.84321e-16	7.32229e-15
PHACTR1	4.31588	1.15781	-1.94452	5.8898e-16	7.37532e-15
EMP2	4.06554	33.72	3.01034	5.92984e-16	7.42006e-15
CDK18	4.30094	35.8982	3.01292	5.96359e-16	7.45688e-15
DSG2	2.98088	25.1518	3.00812	6.08702e-16	7.60017e-15
RASD2	0.640512	5.64045	3.08752	6.17634e-16	7.7061e-15
ITPR2	10.4328	2.92425	-1.89726	6.31073e-16	7.85102e-15
RTKN	2.50607	21.1503	3.02695	6.32198e-16	7.85934e-15
ARL11	6.08266	1.66924	-1.91719	6.74965e-16	8.37288e-15
SEMA3C	0.604858	5.24733	3.06567	6.97024e-16	8.63407e-15
PIM2	190.473	53.308	-1.88893	7.74119e-16	9.541e-15
ITGAV	3.48228	29.1164	2.99358	7.85968e-16	9.68011e-15
TSPAN6	1.02922	8.72612	3.02097	8.71846e-16	1.07225e-14
NGFR	1.98909	16.6154	3.0014	8.78359e-16	1.07948e-14
ABHD14B	59.8712	16.6828	-1.88873	8.96148e-16	1.09978e-14
LINC-PINT	10.017	2.76718	-1.90669	9.63072e-16	1.18023e-14
SOX13	1.39159	11.4856	2.99835	1.06476e-15	1.29929e-14
PFKFB2	9.14028	2.54793	-1.89007	1.14367e-15	1.39228e-14
GP1BA	9.73888	2.68792	-1.90222	1.14914e-15	1.3973e-14
SOWAHC	0.589732	4.9796	3.02111	1.24579e-15	1.5127e-14
COL27A1	3.16549	25.647	2.96641	1.24889e-15	1.51539e-14
FBLN1	6.05479	48.923	2.96667	1.26163e-15	1.5287e-14
PRSS22	0.550692	5.07533	3.1481	1.2867e-15	1.55798e-14
TEAD3	2.00033	16.4381	2.98803	1.33915e-15	1.61921e-14
LOC374443	14.0983	3.95599	-1.89073	1.38242e-15	1.66918e-14
IFI6	23.8612	191.345	2.95754	1.45644e-15	1.75241e-14
TGFA	0.951099	7.90625	2.99213	1.52138e-15	1.82799e-14
CDON	0.535405	4.4193	2.98064	1.75507e-15	2.10438e-14
CDH3	2.83069	22.5787	2.94632	1.75703e-15	2.10526e-14
DUOX1	0.868176	7.02405	2.96885	1.82572e-15	2.18452e-14
ARHGEF19	3.38044	26.8188	2.94003	2.01586e-15	2.40701e-14
OLFM1	5.72414	45.3996	2.93701	2.0733e-15	2.47216e-14
CMPK2	1.17114	9.64043	2.98216	2.17661e-15	2.58818e-14
CXCL1	4.85818	39.1107	2.96401	2.22743e-15	2.64496e-14
BTBD3	0.873969	7.07997	2.95799	2.56716e-15	3.0379e-14
PAXIP1-AS1	14.7231	4.14563	-1.87682	2.59227e-15	3.06551e-14
RAPGEFL1	3.79491	29.5656	2.92426	2.65125e-15	3.1331e-14
RARRES2	160.609	45.3806	-1.86101	2.70145e-15	3.19023e-14
GNG12	2.151	17.0069	2.91801	3.02172e-15	3.55382e-14
DENND5B	4.03051	1.14078	-1.86817	3.10044e-15	3.64391e-14
2017-03-01	12.779	3.6776	-1.85906	3.33648e-15	3.91598e-14
DTNBP1	56.8891	16.2883	-1.85841	3.35027e-15	3.92949e-14
DOCK2	44.9645	12.9458	-1.85278	3.38515e-15	3.9677e-14
HERC6	1.79767	14.1616	2.92413	3.44719e-15	4.03492e-14
LPAR5	15.0376	4.28189	-1.8629	3.48875e-15	4.0808e-14
KRT80	0.532131	4.29795	2.96021	3.73902e-15	4.36169e-14
FLJ23867	0.655701	5.3852	2.99514	3.75487e-15	4.37721e-14
FOSL2	2.9449	22.9721	2.90346	3.86991e-15	4.50826e-14
FUCA1	74.7988	21.5374	-1.84985	4.05368e-15	4.71915e-14
NCS1	1.32017	10.3203	2.91925	4.07636e-15	4.74234e-14
NXN	4.06644	31.3535	2.89992	4.14693e-15	4.82119e-14
PLXNB3	0.540483	4.28372	2.94843	4.43024e-15	5.14709e-14
KIF13A	1.81068	14.0482	2.89451	4.43745e-15	5.15199e-14
SCD5	2.31497	18.0107	2.90637	4.71183e-15	5.46687e-14
CSTA	44.9145	343.823	2.88477	4.81918e-15	5.58389e-14
CLDN12	0.75891	6.05321	2.9402	4.86719e-15	5.63573e-14
EGR2	13.5638	3.89438	-1.85559	4.87297e-15	5.63863e-14
APOM	9.9559	2.73721	-1.90777	5.04008e-15	5.82807e-14
LARP6	1.71451	13.6222	2.93842	5.10541e-15	5.8957e-14
WFDC21P	3.90911	31.0237	2.93734	5.51853e-15	6.35998e-14
LSR	6.54162	49.4941	2.87416	5.76484e-15	6.6394e-14
MAP4K2	28.8319	8.30607	-1.84322	5.91834e-15	6.81163e-14
FNBP1L	1.1792	9.13663	2.89727	6.40967e-15	7.3722e-14
TINAGL1	4.16382	31.6101	2.86932	6.77698e-15	7.7706e-14
ALDH3A1	3.61175	27.1749	2.87948	6.77863e-15	7.7706e-14
ANKRD13A	47.8068	13.9227	-1.8347	7.16858e-15	8.21215e-14
SORD	7.28303	54.9845	2.86326	7.21334e-15	8.25793e-14
SWAP70	46.1304	13.4656	-1.83385	7.27226e-15	8.31986e-14
ZNF618	0.721786	5.52166	2.88097	7.43317e-15	8.4983e-14
PDE9A	1.13141	8.86917	2.91315	8.11928e-15	9.23367e-14
SETBP1	6.39428	1.8512	-1.83834	8.15449e-15	9.26759e-14
ST6GAL1	76.2311	22.2585	-1.82955	8.31157e-15	9.43988e-14
KCNMB1	0.689127	5.65491	2.99321	8.3309e-15	9.4556e-14
OAS3	4.47917	33.5932	2.8472	9.17149e-15	1.03755e-13
SDC4	10.6948	79.9649	2.84638	9.41404e-15	1.06289e-13
GNAI1	0.713201	5.5662	2.90381	9.43418e-15	1.06447e-13
PTPN1	106.838	31.3976	-1.82423	1.0156e-14	1.14516e-13
FAM72B	6.92522	1.99133	-1.85845	1.02347e-14	1.15328e-13
MIR4697HG	1.10498	8.32079	2.86326	1.03812e-14	1.16826e-13
ROBO1	5.6834	42.2529	2.83486	1.12155e-14	1.2605e-13
CDH23	1.80199	13.3657	2.83724	1.1974e-14	1.34224e-13
LPXN	102.295	30.1678	-1.82043	1.23855e-14	1.38747e-13
FOXP3	2.90495	21.6315	2.84381	1.32366e-14	1.48184e-13
LIPE	4.17585	1.18917	-1.84747	1.42608e-14	1.5903e-13
HOXC6	0.843112	6.59963	2.87031	1.49234e-14	1.66311e-13
IL20RB	1.17516	8.8658	2.87828	1.50916e-14	1.68077e-13
IFI27	54.6514	397.054	2.81708	1.51614e-14	1.68745e-13
CYP2S1	2.71796	20.2323	2.83746	1.53113e-14	1.70303e-13
IL17REL	1.73277	12.8612	2.8363	1.54069e-14	1.71146e-13
FAM72C	5.52474	1.58671	-1.85877	1.58407e-14	1.75624e-13
ISYNA1	8.56048	62.0582	2.81369	1.60186e-14	1.77369e-13
FAM72D	5.44147	1.57038	-1.85296	1.80398e-14	1.99364e-13
MARK1	1.44268	10.6143	2.82057	2.00589e-14	2.20969e-13
TVP23C-CDRT4	1.21265	9.0528	2.83231	2.04115e-14	2.24709e-13
KCNJ10	4.98202	1.46866	-1.82336	2.20658e-14	2.42456e-13
CDCP1	0.782196	5.7338	2.82885	2.21098e-14	2.42785e-13
ANXA3	1.13781	8.78024	2.86597	2.22127e-14	2.43759e-13
PLCL2	11.6687	3.44468	-1.81426	2.2251e-14	2.44024e-13
BCAM	7.32562	52.4443	2.79254	2.29571e-14	2.51288e-13
FAM210B	5.42612	39.4352	2.79263	2.35169e-14	2.57251e-13
ITGA6	3.18857	23.0708	2.79101	2.37433e-14	2.59564e-13
SOWAHD	6.12504	1.74542	-1.85345	2.37768e-14	2.59764e-13
S100A2	18.0881	129.747	2.79092	2.38761e-14	2.60684e-13
FANCA	29.135	8.6264	-1.80391	2.45429e-14	2.67625e-13
2017-09-01	94.4263	27.9426	-1.79965	2.82004e-14	3.05958e-13
BCAR3	18.6318	5.55082	-1.80465	2.8766e-14	3.11897e-13
MEX3D	1.21908	8.96128	2.82238	2.90376e-14	3.14644e-13
MEX3A	1.14231	8.2478	2.80817	2.90913e-14	3.15028e-13
GDF15	0.595611	4.74356	2.97005	3.1494e-14	3.40311e-13
RASA4CP	12.723	3.71768	-1.82022	3.19882e-14	3.4488e-13
ADORA2B	0.788541	6.01001	2.87014	3.25055e-14	3.50018e-13
ALDH2	20.0938	141.072	2.76768	3.42705e-14	3.68563e-13
CAV2	2.06733	14.8731	2.7914	3.44875e-14	3.70666e-13
EPHA1	1.31077	9.4288	2.79615	3.46901e-14	3.7261e-13
CEP170B	1.46905	10.4076	2.77136	3.50421e-14	3.76157e-13
HSPA1B	23.8178	167.39	2.76453	3.55515e-14	3.81377e-13
SYVN1	95.3544	28.5087	-1.7908	3.70867e-14	3.97114e-13
PTPRJ	23.5562	7.10487	-1.79012	3.96928e-14	4.22654e-13
PAPSS2	4.64338	32.787	2.75743	4.20448e-14	4.47421e-13
SIPA1L2	1.10188	7.87937	2.77214	4.41791e-14	4.69553e-13
KLHDC7B	3.9616	27.2219	2.75461	4.45259e-14	4.72947e-13
CRNDE	0.768713	6.0318	2.89805	4.50685e-14	4.78415e-13
ACKR3	5.8255	41.1446	2.75426	4.77044e-14	5.05772e-13
LINC01503	1.81978	13.5911	2.86505	5.00377e-14	5.29858e-13
AGR2	3.92406	27.9728	2.77875	5.17468e-14	5.47282e-13
FBXO41	16.6084	4.9779	-1.78413	5.30915e-14	5.60816e-13
DGKD	26.6389	7.9811	-1.78167	5.47512e-14	5.77638e-13
CHST3	1.00198	7.05925	2.75617	5.92262e-14	6.24086e-13
SGPP1	12.8282	3.89404	-1.7887	5.96137e-14	6.27785e-13
ERBB2	4.24528	29.2004	2.73554	6.09148e-14	6.40312e-13
TPBG	1.8695	13.1889	2.75979	6.19637e-14	6.50166e-13
ARHGAP17	50.3993	15.1716	-1.77856	6.19698e-14	6.50166e-13
PTGES	4.36608	30.3989	2.74783	6.24162e-14	6.54098e-13
BAG2	6.33461	1.86213	-1.81898	6.24854e-14	6.54425e-13
NCKAP1	2.74734	19.0871	2.73079	6.70727e-14	7.01189e-13
PLEKHG3	2.05378	14.1945	2.73396	6.79072e-14	7.09482e-13
NCKAP1L	74.3349	22.6277	-1.7731	7.19573e-14	7.49976e-13
TFEB	39.9037	11.9841	-1.77661	7.24538e-14	7.54238e-13
DST	4.43872	30.4446	2.71899	7.58516e-14	7.87703e-13
EFNA1	4.5493	31.3873	2.73925	7.86587e-14	8.15379e-13
PHF19	63.3288	19.2363	-1.77213	7.89037e-14	8.17427e-13
SEMA4C	5.14366	35.0353	2.71853	8.06736e-14	8.34758e-13
DPT	21.2485	6.40157	-1.78131	8.39878e-14	8.67488e-13
SP6	0.837996	5.8705	2.77494	8.76127e-14	9.04386e-13
PLAT	1.70078	11.84	2.73944	9.19349e-14	9.47298e-13
SH3RF1	0.609464	4.26412	2.74726	9.61713e-14	9.89046e-13
CXXC5	30.4029	9.191	-1.77526	9.76835e-14	1.00233e-12
GALNT11	6.38675	43.2439	2.70541	9.96849e-14	1.02165e-12
HS6ST1	7.72274	52.3031	2.70239	1.02008e-13	1.04484e-12
SIPA1	71.3967	21.6627	-1.76323	1.04466e-13	1.06874e-12
FAAH2	1.43753	9.96351	2.7415	1.23888e-13	1.26145e-12
PIF1	15.8716	4.79835	-1.76723	1.35976e-13	1.38045e-12
VAMP1	54.3956	16.6848	-1.75542	1.44247e-13	1.46269e-12
RAB3D	1.75815	11.8187	2.69176	1.54219e-13	1.56105e-12
ITGB5	1.99926	13.4306	2.68361	1.58801e-13	1.60554e-12
CABYR	0.605309	4.41319	2.82877	1.63315e-13	1.64827e-12
ZNF439	7.95799	2.40649	-1.77434	1.65986e-13	1.67426e-12
FAM171A1	2.4601	16.2577	2.67533	1.686e-13	1.69862e-12
PPM1H	0.884677	5.94143	2.69569	1.7113e-13	1.7221e-12
CXCL11	2.58531	17.6963	2.71088	1.72073e-13	1.72957e-12
BMP7	1.01468	6.84636	2.71038	1.74191e-13	1.74779e-12
GOLGA2P7	2.28433	15.1133	2.68747	1.79529e-13	1.79821e-12
CACHD1	0.633859	4.34119	2.71304	1.80721e-13	1.80805e-12
PRRG4	1.24036	8.30866	2.68526	1.91405e-13	1.91271e-12
CCNO	0.775441	5.46369	2.77436	1.96022e-13	1.95432e-12
INPP5D	74.9402	23.1638	-1.74529	1.96249e-13	1.95545e-12
LGALS3BP	33.5256	218.868	2.65753	2.0907e-13	2.08079e-12
TOM1L1	1.57866	10.6339	2.69076	2.14025e-13	2.12642e-12
TRAF5	30.1677	9.2969	-1.74575	2.1667e-13	2.15145e-12
EPHB2	1.62656	10.7408	2.67073	2.23666e-13	2.21709e-12
S100A16	16.2781	105.082	2.65271	2.39411e-13	2.36499e-12
TDRP	1.13922	7.6485	2.6823	2.40286e-13	2.37228e-12
PVRL1	9.38277	61.4048	2.64997	2.41492e-13	2.38281e-12
LYN	51.6736	16.0347	-1.74058	2.43274e-13	2.39902e-12
MICALL2	5.85089	37.8715	2.65028	2.49128e-13	2.45113e-12
MAN1A1	15.983	4.98434	-1.74209	2.65345e-13	2.60474e-12
PNOC	14.7636	4.46531	-1.76387	2.93429e-13	2.87386e-12
RUFY4	0.900753	6.01246	2.68134	3.10046e-13	3.03144e-12
RPL39L	19.6748	6.02914	-1.76562	3.24344e-13	3.16047e-12
DMTN	1.36204	9.02586	2.6664	3.31027e-13	3.22376e-12
E2F8	8.96966	2.79242	-1.74555	3.38408e-13	3.29192e-12
KDF1	1.31437	8.74317	2.68388	3.44908e-13	3.34948e-12
TANC1	1.22177	7.91381	2.62898	3.79919e-13	3.68118e-12
CROT	3.29292	20.9644	2.62626	3.93523e-13	3.81084e-12
HAS3	0.715021	4.71656	2.66652	3.94695e-13	3.82004e-12
GRB7	1.63717	10.6229	2.65533	3.95524e-13	3.82592e-12
NOTCH3	4.18824	26.697	2.61716	4.13458e-13	3.99491e-12
ZNF703	1.70613	10.8781	2.6322	4.38819e-13	4.23519e-12
IL10RA	76.7342	24.062	-1.72327	4.43026e-13	4.27101e-12
HERC5	1.09967	7.16364	2.64186	4.54119e-13	4.37551e-12
C1QTNF1	4.65524	29.5649	2.6149	4.59509e-13	4.42495e-12
PMS2P1	22.0203	6.86692	-1.73201	5.30902e-13	5.08685e-12
MDFI	1.22242	8.10242	2.66559	5.34336e-13	5.11406e-12
TMEM45A	1.50805	9.90215	2.66513	5.59875e-13	5.35254e-12
GRB10	2.03685	12.7888	2.60417	5.61811e-13	5.36807e-12
STX7	29.0371	9.18753	-1.71879	5.65478e-13	5.39712e-12
IQSEC1	29.9898	9.4321	-1.71692	5.65899e-13	5.39814e-12
RARG	5.05064	31.5222	2.59503	6.06234e-13	5.77331e-12
SLC4A11	3.79854	23.4559	2.59653	6.37196e-13	6.05143e-12
LTBR	6.74982	42.2075	2.59323	6.40155e-13	6.07618e-12
KCNMB3	10.6989	3.32501	-1.737	6.66792e-13	6.31856e-12
FANCD2	22.0722	6.9895	-1.71348	6.97978e-13	6.60681e-12
CDKN1A	14.6268	90.9285	2.58459	7.02155e-13	6.6427e-12
PLA2G4A	0.614751	4.03237	2.6565	7.46756e-13	7.03757e-12
PAX9	1.87639	11.8421	2.59735	7.83594e-13	7.3807e-12
CEBPD	6.48449	39.7893	2.58336	8.01325e-13	7.53946e-12
PKP4	4.22223	26.1579	2.57554	8.18522e-13	7.69705e-12
NUAK1	1.016	6.38833	2.59178	8.34419e-13	7.83798e-12
NRROS	15.3632	4.84802	-1.71479	8.74935e-13	8.20961e-12
SERPINA9	4.23257	1.29609	-1.74862	8.78987e-13	8.24314e-12
SUSD3	42.8446	13.4921	-1.71138	8.82142e-13	8.26822e-12
NEURL1B	1.78767	11.0615	2.57524	8.93253e-13	8.3678e-12
YAP1	2.01932	12.567	2.57212	9.13608e-13	8.55383e-12
RAB36	1.28015	7.99754	2.59551	9.27767e-13	8.68168e-12
HCLS1	219.898	70.0902	-1.70136	9.41029e-13	8.801e-12
SNCAIP	0.653098	4.1964	2.62023	9.75503e-13	9.10364e-12
ZEB1-AS1	4.5381	1.40482	-1.75017	9.92373e-13	9.24604e-12
PLCH2	3.87291	23.619	2.56121	1.00066e-12	9.30815e-12
ZNF205	1.35113	8.49433	2.61046	1.03908e-12	9.6499e-12
DOCK4	0.692967	4.34092	2.58534	1.0719e-12	9.94394e-12
SEL1L3	82.1675	26.2676	-1.6977	1.07878e-12	1.00024e-11
EHD1	110.679	35.3836	-1.69643	1.12578e-12	1.04213e-11
KRT6A	22.0115	134.478	2.55325	1.14068e-12	1.05479e-11
TMEM200A	0.746626	4.79311	2.61282	1.18939e-12	1.09807e-11
CITED4	1.41722	9.05836	2.61737	1.25099e-12	1.15061e-11
AMFR	54.7061	17.5089	-1.6928	1.33592e-12	1.22742e-11
GMDS	35.518	11.3307	-1.69856	1.37363e-12	1.26072e-11
LOC729683	7.12884	2.23452	-1.71544	1.46192e-12	1.33676e-11
FZD6	3.74306	22.8078	2.54282	1.47691e-12	1.34976e-11
GSTO2	0.792368	5.34468	2.69074	1.48994e-12	1.36094e-11
INADL	1.13806	6.9096	2.54458	1.50184e-12	1.37036e-11
CDKN3	45.2544	14.5859	-1.69844	1.55919e-12	1.41967e-11
FABP5	110.191	35.2364	-1.69084	1.65747e-12	1.50598e-11
SBK1	0.655404	4.02096	2.5628	1.66017e-12	1.50763e-11
LAMC2	5.4545	32.9072	2.52831	1.73737e-12	1.57526e-11
SHB	1.09377	6.63333	2.54621	1.80306e-12	1.63395e-11
EPHA2	2.02332	12.1392	2.53115	1.83025e-12	1.65764e-11
MAPK10	0.753698	4.64041	2.56705	1.90766e-12	1.7233e-11
GOLGA2P10	2.01849	12.147	2.54303	1.98415e-12	1.78865e-11
PRSS12	2.30638	13.7512	2.52158	2.01317e-12	1.81291e-11
MUC1	6.78941	40.1507	2.52415	2.04043e-12	1.83553e-11
TP73	4.43171	26.2189	2.51889	2.07627e-12	1.86582e-11
POLD4	117.725	37.8431	-1.67922	2.1419e-12	1.92179e-11
TBC1D10C	94.4747	30.3432	-1.67853	2.20627e-12	1.97749e-11
DLG3	2.5747	15.2554	2.51327	2.29571e-12	2.05445e-11
CMTM4	0.794924	4.79219	2.53835	2.30641e-12	2.06295e-11
PLXNA2	0.675926	4.05886	2.52966	2.30893e-12	2.06413e-11
ZNF503	1.08263	6.55168	2.54129	2.31853e-12	2.07064e-11
ARHGAP4	105.556	34.044	-1.67573	2.31862e-12	2.07064e-11
MAP3K8	18.3668	5.92349	-1.68343	2.35457e-12	2.10165e-11
SSBP3	6.09271	35.6739	2.50809	2.43765e-12	2.17131e-11
SPR	3.10611	18.639	2.53983	2.45585e-12	2.18639e-11
RHOD	1.53658	9.65504	2.58685	2.48818e-12	2.21403e-11
TMTC2	0.76467	4.6381	2.53536	2.57531e-12	2.28565e-11
GOLGA8A	90.5357	29.4395	-1.67219	2.57723e-12	2.28618e-11
CYB561	4.9188	28.8351	2.50557	2.61087e-12	2.31483e-11
EPHX2	4.30322	25.3151	2.50275	2.73989e-12	2.42423e-11
EPHB3	1.41576	8.44642	2.51589	2.8113e-12	2.48358e-11
H2AFY2	2.7087	16.0577	2.51887	2.91857e-12	2.5757e-11
ST6GALNAC4	41.5274	13.4298	-1.67434	2.93248e-12	2.58665e-11
NFIX	1.83141	10.735	2.49529	3.21436e-12	2.82372e-11
CD9	33.5452	196.41	2.48956	3.24031e-12	2.84506e-11
PPP1R26	1.82034	10.6349	2.49532	3.3331e-12	2.92504e-11
ETV7	2.49356	14.8196	2.51648	3.35741e-12	2.94487e-11
ADGRL1	1.5567	9.01645	2.49	3.37932e-12	2.96258e-11
DHRS3	9.70357	55.591	2.48807	3.40443e-12	2.98307e-11
TIMP1	417.387	135.981	-1.6642	3.4324e-12	3.00453e-11
PLEKHA1	1.73984	10.2566	2.49872	3.81978e-12	3.33514e-11
CD1E	0.663253	4.15482	2.54411	3.89946e-12	3.40298e-11
DENND1C	44.2866	14.4507	-1.66256	3.95437e-12	3.44741e-11
TUSC1	1.03182	6.18974	2.52551	4.07586e-12	3.54973e-11
LINC00341	18.9059	6.16687	-1.66593	4.137e-12	3.59934e-11
NFATC4	10.3351	3.36523	-1.66611	4.14181e-12	3.6017e-11
ERO1LB	1.57817	9.19949	2.47907	4.26787e-12	3.70945e-11
CD276	5.81366	33.5489	2.47465	4.29163e-12	3.72634e-11
DOCK1	1.9311	11.1859	2.4753	4.29986e-12	3.7316e-11
FLI1	22.4079	7.39473	-1.66027	4.45647e-12	3.86362e-11
WFDC2	27.1038	154.463	2.47159	4.47571e-12	3.87834e-11
ACADM	32.2127	10.6391	-1.66052	4.56106e-12	3.95032e-11
PIK3CG	7.91937	2.60693	-1.66284	4.57971e-12	3.96448e-11
IL21R	46.7999	15.4159	-1.65582	4.71095e-12	4.07399e-11
PHLDA1	1.89692	10.8559	2.47011	4.82063e-12	4.16675e-11
PLEKHG1	14.6122	4.84149	-1.65661	4.96308e-12	4.28772e-11
FRMD6	1.32516	7.78392	2.48384	5.1654e-12	4.46027e-11
MTCL1	1.06043	6.1062	2.48304	5.18449e-12	4.47451e-11
CAMKK1	1.57246	9.02049	2.48193	5.32974e-12	4.59757e-11
DCBLD2	1.0561	6.13072	2.4793	5.34185e-12	4.60341e-11
TMEM54	7.81893	44.5703	2.46427	5.67687e-12	4.8799e-11
CKAP4	10.8434	61.6242	2.44812	6.29308e-12	5.3854e-11
PTPRK	2.10046	11.9942	2.4492	6.50407e-12	5.55492e-11
DNM1P41	1.15394	6.59703	2.47373	6.52286e-12	5.5682e-11
PLEKHG5	2.33477	13.2121	2.44955	6.58075e-12	5.61483e-11
EPB41L4B	0.835542	4.88089	2.49319	6.63831e-12	5.66114e-11
ANKRD65	5.54143	31.4245	2.44664	6.88802e-12	5.86248e-11
BZRAP1	12.1334	4.0148	-1.64541	7.44295e-12	6.30983e-11
SDHAP3	15.4105	5.01507	-1.66666	7.51785e-12	6.36706e-11
CD48	179.547	59.8819	-1.64087	7.78022e-12	6.58279e-11
LAMA5	7.26923	40.4371	2.43204	7.8893e-12	6.6718e-11
GLCE	1.40308	8.00113	2.45326	8.09908e-12	6.84249e-11
NXPH4	8.30305	2.74099	-1.66476	8.63431e-12	7.27682e-11
PYCR1	5.45904	30.4419	2.433	8.70462e-12	7.33249e-11
MTURN	9.07051	3.00366	-1.64485	8.72026e-12	7.34208e-11
IL1B	2.68033	15.5281	2.47251	8.83437e-12	7.43418e-11
PARD3B	0.820184	4.63392	2.44475	8.97745e-12	7.54754e-11
AVPI1	1.97315	11.321	2.47372	9.07016e-12	7.62177e-11
TNFAIP2	41.6692	231.174	2.42139	9.34412e-12	7.83668e-11
TREM2	0.821446	5.08415	2.58623	9.38806e-12	7.8697e-11
LOC102724034	0.774042	5.18501	2.69542	9.98883e-12	8.35899e-11
LY6E	62.3014	342.204	2.41721	9.99118e-12	8.35899e-11
RAC2	434.659	145.33	-1.6314	1.01507e-11	8.48012e-11
RASSF1-AS1	4.05338	1.25225	-1.74302	1.03631e-11	8.63659e-11
2017-09-10	2.1698	12.2549	2.43119	1.07917e-11	8.98944e-11
ADM2	1.90962	10.6138	2.42721	1.11603e-11	9.29201e-11
ZNF101	19.1447	6.4038	-1.63246	1.14573e-11	9.53002e-11
ACKR1	24.5262	8.09715	-1.63895	1.15592e-11	9.61012e-11
CEP70	1.10326	6.27919	2.44753	1.22011e-11	1.01194e-10
TPM2	145.726	48.3512	-1.62768	1.23112e-11	1.02058e-10
ELMO1	20.0246	6.71358	-1.62845	1.27437e-11	1.05491e-10
UCN2	0.863269	5.03261	2.53545	1.33206e-11	1.10054e-10
C14orf132	0.843737	4.64956	2.414	1.38111e-11	1.13834e-10
ACRBP	4.28249	1.38403	-1.68059	1.38744e-11	1.14301e-10
SGK1	17.0901	93.7427	2.39526	1.45994e-11	1.20217e-10
LAPTM5	500.88	169.684	-1.61901	1.51578e-11	1.24635e-10
TNFSF10	22.1037	120.673	2.38971	1.57455e-11	1.29221e-10
RBM38	89.2762	29.9964	-1.61903	1.6017e-11	1.31387e-10
COTL1	278.793	94.2526	-1.61719	1.63155e-11	1.33772e-10
TSKU	2.68674	14.7617	2.40545	1.68928e-11	1.38373e-10
PRRX1	7.04725	38.1758	2.38395	1.72918e-11	1.41372e-10
GADD45A	10.7792	58.6514	2.38495	1.78213e-11	1.45563e-10
ZNF83	29.4085	9.95348	-1.61782	1.86088e-11	1.51707e-10
SLAIN1	4.42338	1.46042	-1.65561	1.89272e-11	1.54231e-10
RAB29	35.8873	12.1377	-1.61478	1.95733e-11	1.59269e-10
CTTN	12.4354	66.3984	2.37489	1.99373e-11	1.62078e-10
DDX60	1.84218	9.99846	2.37592	2.04093e-11	1.65602e-10
GRHL1	1.01178	5.64387	2.42457	2.04244e-11	1.65646e-10
HCST	162.302	54.7583	-1.61447	2.05411e-11	1.66515e-10
RASSF3	19.5774	6.65132	-1.61581	2.06742e-11	1.67514e-10
DGAT2	3.31882	17.7501	2.37839	2.09728e-11	1.69854e-10
GATM	17.1041	5.78671	-1.61951	2.10514e-11	1.7041e-10
FBXO17	0.94344	5.26848	2.429	2.21409e-11	1.79061e-10
FSCN1	17.5221	93.9485	2.36765	2.22276e-11	1.79678e-10
FAM3B	2.88318	15.8518	2.39056	2.28591e-11	1.84523e-10
TNFSF15	0.797442	4.37134	2.39483	2.29253e-11	1.84971e-10
TMEM98	2.80571	15.3006	2.39419	2.37587e-11	1.91426e-10
ORAI2	23.5598	7.9691	-1.60583	2.4368e-11	1.9606e-10
POLM	34.047	11.5185	-1.60871	2.45784e-11	1.97661e-10
SDCBP2	0.858312	4.94172	2.47185	2.57097e-11	2.06181e-10
C5orf63	4.45811	1.49227	-1.63202	2.61659e-11	2.09742e-10
ARHGDIB	681.023	233.38	-1.60209	2.6441e-11	2.11848e-10
GNA11	3.01372	15.9751	2.35962	2.67971e-11	2.14559e-10
RIN1	1.34991	7.2786	2.39118	2.71583e-11	2.17292e-10
TMTC3	1.09712	5.93418	2.3715	2.72501e-11	2.17925e-10
CBS	1.78988	9.64661	2.37663	2.84188e-11	2.2706e-10
SERINC2	3.87294	20.5001	2.36086	2.92171e-11	2.33222e-10
PTPRC	99.2627	34.249	-1.59923	2.93162e-11	2.33905e-10
GPC4	1.71754	9.21895	2.35868	3.19487e-11	2.54084e-10
ARHGAP23	2.61983	13.8372	2.34416	3.35447e-11	2.66155e-10
TOPORS-AS1	9.51097	3.09819	-1.65952	3.43756e-11	2.72378e-10
ARHGAP8	3.85758	20.3803	2.3539	3.51091e-11	2.77807e-10
CFB	12.9508	66.9116	2.3383	3.57671e-11	2.82883e-10
OSBPL1A	1.72255	9.21582	2.35817	3.6662e-11	2.89829e-10
ARHGAP10	1.40309	7.52767	2.35784	3.86044e-11	3.05044e-10
KCTD7	10.7188	3.67886	-1.59654	4.01592e-11	3.16748e-10
ZNF629	1.39869	7.31286	2.33635	4.08415e-11	3.21834e-10
TEAD4	1.60986	8.61452	2.37817	4.23565e-11	3.33011e-10
FUT2	0.90965	4.86894	2.37089	4.26028e-11	3.34642e-10
TNKS1BP1	7.83455	40.6452	2.32347	4.45244e-11	3.49417e-10
GAS2L1	2.02001	10.5907	2.34421	4.80245e-11	3.76542e-10
GCHFR	28.6372	9.71671	-1.60425	4.88631e-11	3.82768e-10
APCDD1	1.53872	8.11287	2.34518	4.95833e-11	3.88234e-10
VAV1	49.6946	17.1513	-1.5847	4.9809e-11	3.89824e-10
BCL6	54.8994	18.9474	-1.58421	4.98792e-11	3.90195e-10
LPAR6	3.48593	18.031	2.32072	5.01234e-11	3.91695e-10
KLF4	1.34764	7.14149	2.34765	5.01391e-11	3.91695e-10
FUT8	20.6593	7.21476	-1.58609	5.06494e-11	3.95298e-10
TRIM2	1.30265	6.8692	2.32903	5.1588e-11	4.02102e-10
ID1	14.8844	76.0701	2.31444	5.33429e-11	4.15216e-10
NIN	23.9643	8.37542	-1.58039	5.56407e-11	4.3271e-10
VRK2	12.249	63.224	2.30969	5.64837e-11	4.39068e-10
GMFG	172.747	59.7756	-1.58158	5.65577e-11	4.39445e-10
HIST3H2A	1.00832	6.06876	2.48594	5.71974e-11	4.44015e-10
RNF207	2.20111	11.246	2.31216	5.81841e-11	4.51267e-10
SCNN1A	0.973951	5.1213	2.34536	5.99788e-11	4.64769e-10
ERRFI1	1.7161	9.00101	2.33254	6.02322e-11	4.66522e-10
PKIG	88.4914	30.6048	-1.57896	6.17634e-11	4.78167e-10
LIFR	1.14144	5.91848	2.30237	6.331e-11	4.897e-10
OGFRL1	3.06869	16.0046	2.32317	6.53246e-11	5.04602e-10
PHLDA2	1.21175	6.74437	2.42875	6.571e-11	5.07352e-10
IGF1R	1.97214	10.0881	2.29626	6.93026e-11	5.34372e-10
RFTN1	92.3114	32.2431	-1.57258	7.02358e-11	5.41325e-10
ACVR1B	2.97	15.1732	2.29503	7.41251e-11	5.70534e-10
GPX7	27.3961	9.48286	-1.58121	7.55411e-11	5.80654e-10
NKD2	1.18421	6.22607	2.34801	7.58589e-11	5.82577e-10
DAB2IP	3.45664	17.5624	2.29189	7.59208e-11	5.82793e-10
CCNE1	15.1748	5.25599	-1.58146	8.02594e-11	6.15001e-10
ARHGAP24	8.87058	3.08254	-1.57559	8.5254e-11	6.51243e-10
HOXA7	1.0122	5.35465	2.31401	8.77938e-11	6.69754e-10
SLC46A3	9.67661	3.38211	-1.57597	9.22986e-11	7.02252e-10
SYNE3	4.5495	1.56878	-1.58813	9.31538e-11	7.08446e-10
FRMD4A	3.06507	15.3908	2.27006	1.05174e-10	7.97398e-10
RAI14	7.40639	37.3647	2.26777	1.07846e-10	8.17298e-10
ARHGAP30	102.023	35.8908	-1.55789	1.09173e-10	8.26987e-10
C1orf233	1.0368	5.3743	2.32721	1.10369e-10	8.35676e-10
IMPDH1	52.858	18.6079	-1.55941	1.12135e-10	8.47651e-10
PLS3	5.38037	27.0364	2.26629	1.12442e-10	8.49509e-10
MAPK12	14.2826	4.97814	-1.57193	1.12692e-10	8.51022e-10
PLCD3	1.71102	8.60659	2.28578	1.15762e-10	8.73059e-10
TTC9	5.29678	1.84282	-1.56906	1.16913e-10	8.80963e-10
CRB3	2.24758	11.6384	2.34644	1.20448e-10	9.05623e-10
U2AF1L4	49.6692	17.3153	-1.56376	1.20932e-10	9.08468e-10
MFAP2	3.79581	19.1925	2.30003	1.29061e-10	9.68688e-10
PODXL	5.00593	24.8353	2.25195	1.36868e-10	1.02505e-09
GRASP	2.0162	10.0684	2.28613	1.37014e-10	1.0257e-09
IL15	1.36219	6.93077	2.29265	1.38097e-10	1.03336e-09
SMPDL3B	1.22853	6.27772	2.29463	1.412e-10	1.05566e-09
ST3GAL5	25.2988	8.90564	-1.55558	1.42724e-10	1.06659e-09
SKAP2	21.0984	7.49886	-1.55302	1.43628e-10	1.07288e-09
DKK3	4.97173	24.5872	2.25333	1.46895e-10	1.09633e-09
KHDC1	4.66434	1.5833	-1.60193	1.50326e-10	1.12145e-09
MYO6	3.27856	16.1091	2.24318	1.53778e-10	1.14621e-09
CBL	9.08396	3.23957	-1.5495	1.56627e-10	1.16543e-09
HDGFRP3	3.57496	17.734	2.248	1.5813e-10	1.17564e-09
PLAGL1	14.1223	4.97801	-1.55593	1.58136e-10	1.17564e-09
ZNF296	22.5201	7.8983	-1.55516	1.65228e-10	1.22731e-09
MT1F	59.2012	20.8386	-1.55937	1.69732e-10	1.26022e-09
KCNN4	42.0394	14.8428	-1.54699	1.72379e-10	1.27822e-09
PTPN7	61.1286	21.6636	-1.54436	1.72673e-10	1.27985e-09
PVR	1.88394	9.26216	2.24271	1.74494e-10	1.29223e-09
CARD8-AS1	7.93992	2.78488	-1.5672	1.77252e-10	1.31209e-09
SLC6A9	1.93184	9.46128	2.25122	1.7828e-10	1.31913e-09
SH3PXD2A	3.70041	18.1114	2.23348	1.81132e-10	1.33793e-09
TCF7L1	2.65228	13.0856	2.2436	1.91679e-10	1.41463e-09
ACAP1	81.9966	29.0045	-1.53971	1.97332e-10	1.4551e-09
MAP3K6	3.43961	16.6327	2.22897	2.04078e-10	1.50292e-09
PIK3CD	41.6065	14.8042	-1.53584	2.21447e-10	1.62665e-09
SCO2	14.367	68.5603	2.22225	2.24313e-10	1.647e-09
CDCA7	37.0303	13.2967	-1.53726	2.29503e-10	1.68439e-09
LRG1	1.2034	6.13197	2.29869	2.41626e-10	1.76962e-09
ATP8B1	0.936118	4.62182	2.23746	2.4163e-10	1.76962e-09
ATF3	2.11066	10.3493	2.25286	2.44738e-10	1.79162e-09
LOC554206	4.28663	1.43469	-1.61284	2.54577e-10	1.86286e-09
JDP2	12.3881	4.42858	-1.53829	2.55991e-10	1.87241e-09
SMAD1	3.86258	18.5915	2.21405	2.56754e-10	1.8772e-09
SPON2	3.0539	14.7221	2.23262	2.60104e-10	1.90007e-09
LDOC1	2.80625	13.6594	2.2341	2.62829e-10	1.91916e-09
AP1S3	6.52238	2.30776	-1.54458	2.65362e-10	1.93602e-09
ANGPT2	1.61642	7.84509	2.2146	2.72389e-10	1.9856e-09
CCDC167	77.304	27.5317	-1.53427	2.86671e-10	2.08354e-09
EMB	23.1431	8.3521	-1.52918	2.89551e-10	2.10358e-09
PARD6G	1.25267	6.10807	2.22725	3.13546e-10	2.2687e-09
CTBP2	2.86238	13.6514	2.20363	3.14314e-10	2.27293e-09
ETS1	73.0696	26.5705	-1.52339	3.15923e-10	2.28265e-09
ASPN	1.09848	5.4512	2.25271	3.18903e-10	2.30226e-09
CYGB	2.2877	10.9588	2.22092	3.23176e-10	2.32822e-09
GAS6	10.1617	47.9656	2.1951	3.24682e-10	2.33809e-09
ZNF529-AS1	4.43744	1.52717	-1.58556	3.32204e-10	2.39026e-09
YES1	1.55894	7.52315	2.2089	3.38334e-10	2.43233e-09
CEACAM21	5.57561	1.94106	-1.56684	3.50693e-10	2.51908e-09
NEK3	9.47537	3.39688	-1.53692	3.67972e-10	2.64099e-09
LY9	17.6804	6.31148	-1.52778	3.70981e-10	2.66148e-09
CCDC74A	1.97857	9.57361	2.23126	3.74538e-10	2.68588e-09
PSD4	58.2136	21.0363	-1.51793	3.76247e-10	2.69701e-09
LOC727751	4.76365	22.0754	2.18788	3.80218e-10	2.72434e-09
MAP4K4	51.4005	18.6223	-1.51676	3.86633e-10	2.76801e-09
HMHA1	96.2234	34.635	-1.51599	3.91578e-10	2.79992e-09
FAM129B	8.4804	39.8722	2.18277	3.92571e-10	2.80469e-09
HSPB1	111.634	516.4	2.17609	4.21204e-10	3.00177e-09
ITGBL1	7.37026	2.63927	-1.53367	4.29146e-10	3.05711e-09
ABCB9	0.894322	4.29619	2.20973	4.40033e-10	3.13337e-09
GNG11	18.2774	6.51729	-1.53375	4.43208e-10	3.15207e-09
GPSM1	2.1033	9.95511	2.19104	4.50436e-10	3.20082e-09
CERS6	1.6282	7.7203	2.17557	4.54885e-10	3.23111e-09
RBM47	2.92418	13.6939	2.17494	4.66847e-10	3.31334e-09
RND3	2.9792	14.0431	2.17846	4.68676e-10	3.32495e-09
MBOAT1	2.08583	9.75794	2.17374	4.71446e-10	3.34185e-09
ILDR1	1.18948	5.68869	2.20111	4.72317e-10	3.34665e-09
HIST1H2BH	1.06734	6.00409	2.38816	4.75159e-10	3.3654e-09
ISG15	38.1896	176.219	2.16714	4.99804e-10	3.53559e-09
PROCA1	6.41667	2.25682	-1.54783	5.01206e-10	3.54405e-09
FAM72A	5.9469	2.12626	-1.54337	5.11976e-10	3.61575e-09
AIF1L	1.06186	5.05179	2.20333	5.19284e-10	3.66436e-09
TMEM150C	3.5529	16.7838	2.17701	5.29743e-10	3.7351e-09
CDC42BPG	1.52708	7.1389	2.17736	5.42144e-10	3.82097e-09
PON2	6.32417	29.4561	2.16472	5.48298e-10	3.86119e-09
MIOS	23.8317	8.72635	-1.50868	5.56249e-10	3.91398e-09
CNKSR1	2.56297	11.9582	2.18193	5.59456e-10	3.93333e-09
FAM127C	0.980538	4.7273	2.22238	5.99514e-10	4.2098e-09
MARVELD1	2.92127	13.5902	2.16049	6.13989e-10	4.30969e-09
SEMA4A	73.3402	26.9659	-1.49993	6.50545e-10	4.55699e-09
CCM2	129.804	47.3992	-1.49905	6.67564e-10	4.6724e-09
ARNTL2	2.01166	9.33291	2.15156	6.70976e-10	4.69247e-09
NGFRAP1	15.2461	69.8254	2.14614	6.9463e-10	4.85199e-09
ZNF671	11.1527	4.05694	-1.50946	7.21551e-10	5.0339e-09
GTF3A	169.126	62.2689	-1.49573	7.37372e-10	5.14219e-09
OLFM2	1.9226	8.98766	2.16462	7.78154e-10	5.41125e-09
IL21R-AS1	5.11555	1.82901	-1.52485	7.78985e-10	5.41484e-09
UNC13B	1.34638	6.17184	2.14003	8.27906e-10	5.74562e-09
IDH1	15.286	69.4376	2.1329	8.33016e-10	5.77642e-09
PITX1	4.56204	20.2847	2.13843	8.35929e-10	5.79429e-09
EVI2A	17.3531	6.41549	-1.49697	8.47749e-10	5.87386e-09
CX3CL1	5.89918	26.7534	2.13001	8.95055e-10	6.19415e-09
MX1	20.6289	93.0354	2.12601	8.96267e-10	6.19756e-09
OBSL1	3.54995	16.0532	2.12848	9.15261e-10	6.32129e-09
DOCK8	28.6365	10.6347	-1.48844	9.16116e-10	6.32466e-09
BCL2L14	2.44829	11.3913	2.16155	9.28342e-10	6.40392e-09
CD24	36.5105	165.34	2.12103	9.68677e-10	6.67414e-09
ANKRD44	15.0923	5.60331	-1.48883	9.74578e-10	6.70943e-09
ICAM3	96.3741	35.4179	-1.48651	9.77414e-10	6.72627e-09
TTC21A	6.111	2.22355	-1.49893	9.92941e-10	6.82766e-09
HLA-DMA	381.153	141.256	-1.48399	1.01773e-09	6.98977e-09
CLEC7A	6.86833	31.1192	2.12229	1.03794e-09	7.12e-09
SNX7	1.25671	5.95273	2.18284	1.05105e-09	7.20424e-09
MID1	0.881523	4.04524	2.13948	1.06413e-09	7.29097e-09
P2RY10	15.0764	5.59236	-1.49508	1.07509e-09	7.36313e-09
LYPD1	0.976713	4.56948	2.2017	1.08489e-09	7.42729e-09
CD83	80.3359	30.1228	-1.48172	1.11836e-09	7.6487e-09
EVA1C	1.74225	7.95691	2.14418	1.12543e-09	7.68955e-09
CAMSAP3	1.25592	5.67647	2.13169	1.17522e-09	8.01701e-09
ADORA2A	35.959	13.3297	-1.48129	1.21628e-09	8.28398e-09
HSPA1A	28.2455	125.333	2.10502	1.23437e-09	8.39721e-09
TRANK1	18.0482	6.72167	-1.47745	1.26985e-09	8.62494e-09
NR2F6	5.70406	25.3746	2.10889	1.2969e-09	8.79829e-09
F11R	13.3963	59.5202	2.10216	1.2975e-09	8.79889e-09
PRKD3	20.1739	7.57577	-1.47716	1.3262e-09	8.97581e-09
KEL	5.85394	25.7476	2.09944	1.4059e-09	9.48389e-09
ARPC1B	338.48	125.928	-1.47261	1.40622e-09	9.48389e-09
LPIN3	2.93499	12.9858	2.10319	1.42652e-09	9.61367e-09
IFIH1	5.76573	25.7167	2.09833	1.42658e-09	9.61367e-09
AUTS2	2.47598	11.0212	2.09706	1.4323e-09	9.64461e-09
SEMA6A	1.9937	8.8739	2.09948	1.4455e-09	9.72971e-09
FAM43A	22.693	8.50794	-1.47407	1.52823e-09	1.02705e-08
PSMB8-AS1	72.9489	27.2118	-1.47178	1.58777e-09	1.0654e-08
HPGD	1.03497	4.6912	2.11413	1.61334e-09	1.08171e-08
RBFOX2	4.32482	19.1283	2.08549	1.70328e-09	1.13715e-08
PHYHD1	6.62021	2.39353	-1.49887	1.82365e-09	1.21563e-08
KIAA1598	1.69799	7.46971	2.08639	1.84511e-09	1.22945e-08
GPSM3	113.542	42.5834	-1.46371	1.89174e-09	1.25809e-08
PPP2R5C	64.6928	24.5158	-1.4628	1.94396e-09	1.29232e-08
P4HA2	3.51744	15.6374	2.09264	1.96025e-09	1.30164e-08
CIART	1.12534	5.21746	2.17078	1.97451e-09	1.31024e-08
VASH2	1.10213	4.95946	2.10325	1.97979e-09	1.31222e-08
MERTK	2.33051	10.2075	2.07738	2.16363e-09	1.43062e-08
PDE1B	8.18495	3.04977	-1.47113	2.17009e-09	1.43434e-08
PPFIA4	0.950479	4.18808	2.09507	2.17739e-09	1.43861e-08
CNN3	15.0302	65.9764	2.06755	2.21885e-09	1.46544e-08
XAF1	16.0802	69.7354	2.06387	2.28605e-09	1.50867e-08
AGAP2-AS1	2.07307	9.18543	2.10424	2.29196e-09	1.51199e-08
CDC42EP1	8.12642	35.062	2.06569	2.32737e-09	1.533e-08
C1orf228	4.71965	1.71006	-1.50402	2.35842e-09	1.55286e-08
AFAP1	1.90672	8.2915	2.06332	2.44536e-09	1.60887e-08
FNDC3B	3.08697	13.489	2.06171	2.4609e-09	1.61848e-08
GIPC1	11.4118	49.139	2.06071	2.47906e-09	1.6298e-08
ADAM9	4.02563	17.6056	2.0613	2.54935e-09	1.67282e-08
PNP	48.2866	18.2561	-1.454	2.57791e-09	1.69091e-08
AKAP2	23.2206	8.81803	-1.45226	2.63546e-09	1.72669e-08
EMC3-AS1	9.61385	3.60724	-1.45878	2.68186e-09	1.75508e-08
OBSCN	1.01874	4.3629	2.04982	2.86039e-09	1.86837e-08
PASK	32.8961	12.478	-1.44933	2.86471e-09	1.86977e-08
HMGN5	1.30984	5.74788	2.09756	2.87776e-09	1.87758e-08
MTSS1L	3.4203	14.6572	2.05265	2.90109e-09	1.89137e-08
PCED1B-AS1	6.06402	2.2614	-1.4698	2.94998e-09	1.92251e-08
MTMR14	45.949	17.4082	-1.44914	2.97151e-09	1.93581e-08
ACTR8	13.9439	5.29233	-1.45308	3.00896e-09	1.95947e-08
DLGAP5	14.5073	5.5646	-1.45327	3.06914e-09	1.9979e-08
LCP1	356.951	137.232	-1.44383	3.15512e-09	2.05232e-08
ZNF589	25.7112	9.77287	-1.44797	3.18122e-09	2.06851e-08
SLCO2A1	4.53507	19.5018	2.04518	3.19823e-09	2.07879e-08
AP1S2	10.3197	3.92147	-1.45919	3.20481e-09	2.08228e-08
LRRK1	15.1467	5.76385	-1.44613	3.2088e-09	2.08408e-08
ZNF385A	11.4368	48.754	2.04126	3.2708e-09	2.12275e-08
HSBP1L1	2.95676	13.0059	2.09292	3.29522e-09	2.1378e-08
ATL2	9.10224	39.1093	2.03874	3.40163e-09	2.20351e-08
LDOC1L	2.11186	9.03727	2.0418	3.44384e-09	2.22833e-08
ODF3B	9.1871	38.7745	2.04097	3.57033e-09	2.30845e-08
ZDHHC21	4.3812	1.67054	-1.44807	3.63429e-09	2.34804e-08
LOC654342	1.18751	5.6997	2.21064	3.65632e-09	2.36138e-08
LRRC1	2.17384	9.41983	2.05211	3.67061e-09	2.36973e-08
TRIP6	13.2897	55.9796	2.03128	3.81662e-09	2.45846e-08
NMB	8.39626	3.11069	-1.4801	3.82869e-09	2.46531e-08
EFNB2	2.43697	10.4382	2.03394	3.89213e-09	2.50335e-08
MAPRE3	2.84572	12.1482	2.04763	3.91074e-09	2.51438e-08
TMEM237	1.77424	7.56898	2.0322	3.98185e-09	2.55819e-08
CELSR1	3.71304	15.7735	2.02475	4.12057e-09	2.64337e-08
UNC5B	2.72623	11.54	2.02831	4.12613e-09	2.64595e-08
GFI1	7.33986	2.78442	-1.45233	4.14637e-09	2.65794e-08
GAS1	1.06935	4.68934	2.06083	4.18564e-09	2.68111e-08
ICOSLG	6.12848	25.811	2.02325	4.33334e-09	2.76954e-08
LPCAT1	42.4884	16.3002	-1.4343	4.35829e-09	2.78342e-08
ACSF3	17.7816	6.76838	-1.4377	4.37134e-09	2.79072e-08
CADM4	1.99614	8.58108	2.05002	4.52741e-09	2.88714e-08
SVIL	3.14482	13.2475	2.01642	4.81934e-09	3.06763e-08
COL5A1	4.47583	18.8113	2.01256	5.02226e-09	3.1909e-08
LIMD1	17.3983	6.69009	-1.43026	5.02474e-09	3.1913e-08
LRP3	1.41659	6.0293	2.03605	5.0348e-09	3.1965e-08
FAM107B	43.4812	16.8197	-1.42879	5.1102e-09	3.24079e-08
LMO4	8.57997	35.6507	2.00889	5.12224e-09	3.24723e-08
2017-09-07	65.4587	25.4134	-1.42728	5.15944e-09	3.26961e-08
SORT1	1.40717	5.88369	2.01448	5.2598e-09	3.32953e-08
ABCC3	11.6053	4.45497	-1.43212	5.34015e-09	3.37667e-08
ZNF577	8.94675	3.39767	-1.44771	5.5477e-09	3.50156e-08
SNRNP25	63.1495	24.1714	-1.42876	5.54783e-09	3.50156e-08
ELK3	17.2692	6.68776	-1.42779	5.58611e-09	3.52443e-08
ARPC4-TTLL3	18.3539	7.01079	-1.42727	5.76452e-09	3.63034e-08
RAB7B	2.04656	8.66622	2.03774	5.91284e-09	3.71831e-08
SLC17A9	24.737	9.48809	-1.42554	6.05786e-09	3.79979e-08
PLAU	20.4443	84.5906	1.99676	6.21102e-09	3.89122e-08
CAMK2D	11.7521	4.56578	-1.42459	6.21267e-09	3.89122e-08
NGLY1	31.3337	12.1212	-1.42377	6.22598e-09	3.89814e-08
RINL	11.6901	4.49273	-1.42877	6.29948e-09	3.94273e-08
MCF2L	1.983	8.20329	1.99808	6.49054e-09	4.05494e-08
KSR1	1.81117	7.51385	2.00091	6.51449e-09	4.06842e-08
EPS8L2	6.1496	25.393	1.99361	6.6392e-09	4.1418e-08
MAFIP	9.22417	38.3441	1.9961	6.65217e-09	4.14689e-08
IL7	4.44719	1.68	-1.45734	6.81566e-09	4.24419e-08
IER5L	1.90074	7.90125	2.01191	6.8321e-09	4.25289e-08
DOK1	27.0597	10.4512	-1.42134	6.94994e-09	4.32312e-08
WBP5	8.00179	33.1885	1.99841	7.00403e-09	4.3552e-08
MYOF	2.85922	11.8813	1.98946	7.206e-09	4.47271e-08
DMC1	7.33278	2.69216	-1.48743	7.22791e-09	4.48307e-08
MYB	3.91486	16.2458	1.98827	7.27657e-09	4.51163e-08
PXYLP1	1.30027	5.46686	2.012	7.42556e-09	4.60069e-08
PLD1	1.94898	8.07933	1.9881	7.60275e-09	4.70539e-08
LOC100505915	50.8885	19.7931	-1.41484	7.60607e-09	4.70576e-08
MYO5B	1.40285	5.78452	1.98461	7.71048e-09	4.76864e-08
MICAL2	3.46361	14.2547	1.98356	7.7695e-09	4.80342e-08
TOR4A	8.62441	3.335	-1.42063	7.79811e-09	4.81938e-08
HAUS4	56.6408	22.0812	-1.41494	7.80108e-09	4.81948e-08
MYO1B	4.26241	17.545	1.97798	8.4102e-09	5.18464e-08
NET1	6.54912	26.8694	1.97738	8.4399e-09	5.20108e-08
ZFPM1	5.04499	1.92593	-1.43014	8.45199e-09	5.20481e-08
ALDH5A1	17.2317	6.73323	-1.41116	8.66379e-09	5.32381e-08
C20orf196	8.16608	3.12089	-1.43774	8.71265e-09	5.3515e-08
HIST2H2BC	5.89764	2.15342	-1.49825	8.83494e-09	5.41931e-08
HSH2D	67.1581	25.9731	-1.40831	8.86675e-09	5.43302e-08
PDGFA	1.99128	8.25939	1.99668	8.90361e-09	5.45366e-08
SRC	6.06487	24.7421	1.97324	8.95256e-09	5.48169e-08
RASSF2	51.3097	20.167	-1.40568	9.31786e-09	5.69726e-08
ARHGAP22	1.37677	5.72228	2.0017	9.32593e-09	5.70011e-08
KCNK1	2.95874	12.2723	1.99176	9.38334e-09	5.73119e-08
TSPAN15	7.11587	28.8878	1.9738	9.50954e-09	5.80622e-08
CTTNBP2NL	1.34225	5.52171	1.97732	9.52228e-09	5.81159e-08
ZNF358	5.1016	20.6414	1.97295	9.5251e-09	5.81159e-08
FAM126A	5.13544	2.00432	-1.41493	9.54951e-09	5.82236e-08
LRP11	1.37167	5.7327	1.99618	9.61632e-09	5.86102e-08
RGPD5	1.88816	7.72477	1.97087	9.63744e-09	5.86974e-08
NEO1	2.06125	8.40868	1.96866	9.81247e-09	5.97422e-08
OSGEP	41.6133	16.2224	-1.40678	1.01271e-08	6.16142e-08
KLF3	2.43281	9.90261	1.96479	1.02194e-08	6.21317e-08
ABCC5	7.44085	30.0233	1.96328	1.02354e-08	6.22073e-08
SORL1	21.4525	8.51339	-1.40182	1.03969e-08	6.31444e-08
USP54	2.68558	10.8712	1.96365	1.06213e-08	6.44392e-08
WDR47	2.25979	9.2117	1.96414	1.10327e-08	6.68171e-08
PNN	164.676	64.8663	-1.3983	1.11904e-08	6.76598e-08
RELL2	11.5366	4.45948	-1.40928	1.16258e-08	7.01623e-08
MAP3K1	9.34566	3.69452	-1.40067	1.17582e-08	7.09364e-08
EPS8L1	1.32083	5.43553	1.99573	1.17969e-08	7.11453e-08
TRAPPC2L	76.1562	29.7982	-1.40181	1.2308e-08	7.40676e-08
RAB40B	1.46322	6.05082	1.98436	1.23116e-08	7.40676e-08
SLC12A7	11.0692	44.1222	1.94862	1.23966e-08	7.45531e-08
FERMT3	77.7751	30.5981	-1.3954	1.246e-08	7.4882e-08
SLC43A3	58.1052	22.9706	-1.3957	1.25596e-08	7.54274e-08
FOS	2.49569	10.1732	1.97081	1.27034e-08	7.62649e-08
DENND4B	43.5246	17.0983	-1.3941	1.2812e-08	7.68899e-08
GNB3	5.28057	2.00793	-1.42937	1.38964e-08	8.32814e-08
TEP1	13.8098	5.46092	-1.39117	1.42036e-08	8.4975e-08
LIMK1	49.4743	19.4954	-1.39084	1.42341e-08	8.51278e-08
C9orf3	3.2065	12.7117	1.94771	1.43201e-08	8.55531e-08
TJP1	2.19417	8.78734	1.94132	1.44259e-08	8.61551e-08
ATP8A1	5.4204	2.14759	-1.39481	1.47751e-08	8.81486e-08
STEAP1	2.18774	8.99405	1.98501	1.49693e-08	8.91837e-08
ETS2	7.29471	28.9211	1.93628	1.50636e-08	8.97148e-08
COL16A1	4.57656	18.2278	1.9379	1.51369e-08	9.012e-08
CERS6-AS1	1.28688	5.2266	1.96188	1.53398e-08	9.11702e-08
STAG3L1	11.0309	4.32259	-1.40091	1.55698e-08	9.24737e-08
IMPACT	2.31433	9.26108	1.93465	1.66164e-08	9.85533e-08
MAPKBP1	4.59246	18.0491	1.92895	1.66933e-08	9.89754e-08
SOCS2	1.35036	5.46966	1.95762	1.73538e-08	1.02736e-07
MAST4	1.97281	7.80029	1.92962	1.73573e-08	1.02736e-07
ANXA1	24.4583	96.3692	1.92577	1.73939e-08	1.02917e-07
PLAC8	6.95937	27.4093	1.92787	1.74458e-08	1.03188e-07
LDLR	2.20122	8.73348	1.93044	1.75027e-08	1.0349e-07
ARHGEF35	1.34332	5.46828	1.94725	1.7622e-08	1.04123e-07
SCPEP1	23.5972	92.7164	1.92223	1.81984e-08	1.07419e-07
CBX2	3.50623	13.8446	1.92861	1.83297e-08	1.08119e-07
DLK2	1.25009	5.11132	1.98035	1.86196e-08	1.09792e-07
TGFBR2	22.9452	9.17498	-1.3804	1.92995e-08	1.13645e-07
EBF4	2.31463	9.21644	1.9333	1.93669e-08	1.14003e-07
CPD	2.12234	8.39753	1.91998	1.96184e-08	1.15444e-07
MOK	1.05768	4.31166	1.98533	2.03781e-08	1.19833e-07
ZC2HC1A	1.07809	4.26442	1.93875	2.08039e-08	1.22211e-07
TBC1D16	1.81292	7.0649	1.91429	2.10701e-08	1.23649e-07
C10orf35	1.89604	7.64419	1.97995	2.16089e-08	1.26724e-07
RCN1	20.4551	80.0547	1.91003	2.16191e-08	1.2674e-07
LINC01410	4.61633	1.81698	-1.39927	2.19259e-08	1.28496e-07
TMEM51	3.51851	13.8908	1.92724	2.25766e-08	1.32219e-07
VCAM1	16.9684	66.7946	1.90544	2.29892e-08	1.3459e-07
CTNNBIP1	4.07945	15.8686	1.91047	2.34244e-08	1.37045e-07
B3GNT7	4.81018	1.8995	-1.38906	2.36612e-08	1.38383e-07
EBLN3	32.5971	13.1328	-1.37116	2.42038e-08	1.41508e-07
LINC01057	1.95663	7.72864	1.96109	2.50029e-08	1.45932e-07
ARHGAP19	10.4849	4.22928	-1.37179	2.60452e-08	1.51707e-07
C17orf62	164.326	65.7107	-1.36577	2.68806e-08	1.5652e-07
RIPK3	16.8188	6.69576	-1.37464	2.72522e-08	1.58576e-07
C9orf116	2.62521	10.4889	1.95169	2.75993e-08	1.60488e-07
FCGR2B	33.6084	13.5064	-1.36809	2.76516e-08	1.60738e-07
CACNB3	2.33746	9.06027	1.91542	2.76655e-08	1.60764e-07
VEGFA	12.0437	46.3817	1.89101	2.86671e-08	1.66416e-07
GAMT	5.88461	22.6345	1.90142	2.91467e-08	1.69143e-07
CLSPN	10.0402	4.05146	-1.36486	2.99262e-08	1.73491e-07
FCHO1	21.8366	8.75904	-1.36435	3.06491e-08	1.77503e-07
TC2N	3.09975	11.9307	1.88666	3.06875e-08	1.77647e-07
PTPRU	1.06259	4.0966	1.90443	3.08282e-08	1.7836e-07
OPLAH	1.8942	7.21263	1.90483	3.13789e-08	1.81425e-07
CDC42EP2	2.38093	9.21386	1.90943	3.20511e-08	1.85124e-07
ADCY6	2.16697	8.27758	1.88606	3.24158e-08	1.87042e-07
LINC01002	1.14272	4.39225	1.89633	3.2508e-08	1.87512e-07
TBL1XR1	38.5902	15.7325	-1.35879	3.25415e-08	1.87642e-07
STXBP1	2.37796	9.14598	1.88799	3.28262e-08	1.89157e-07
RAPH1	1.09517	4.23881	1.88761	3.28969e-08	1.89501e-07
MYO5C	1.26065	4.83366	1.88555	3.43707e-08	1.97594e-07
IRS2	1.38647	5.32333	1.88132	3.5187e-08	2.02085e-07
CISH	3.60888	13.8381	1.8881	3.5721e-08	2.05015e-07
HLA-DMB	205.439	83.5972	-1.35472	3.59624e-08	2.06262e-07
PCGF2	2.34067	8.96761	1.89254	3.60301e-08	2.06513e-07
TNFAIP3	21.1784	81.1122	1.87178	3.68488e-08	2.10925e-07
CBR3	4.14461	15.9804	1.89864	3.7186e-08	2.12784e-07
PSAT1	5.95844	22.6695	1.87253	4.00692e-08	2.28599e-07
TVP23C	3.15693	12.0364	1.88624	4.02788e-08	2.29719e-07
LMO2	19.3437	7.79817	-1.35925	4.03973e-08	2.30242e-07
ASAP2	1.17377	4.54151	1.88563	4.05519e-08	2.31047e-07
SMG1P3	9.70835	3.94626	-1.35583	4.08651e-08	2.32677e-07
FAM183A	1.66471	6.86073	1.9785	4.20312e-08	2.3908e-07
RNF19B	16.0644	60.6143	1.86295	4.21316e-08	2.39571e-07
WIPF1	54.9337	22.4626	-1.34837	4.24407e-08	2.4109e-07
A1BG-AS1	6.2408	2.49338	-1.37066	4.3008e-08	2.44071e-07
LGALS9	58.1361	217.813	1.85894	4.40769e-08	2.49972e-07
INSIG1	19.6243	8.01124	-1.3516	4.42556e-08	2.50903e-07
ANXA2R	11.2652	4.48196	-1.36828	4.49483e-08	2.54411e-07
ASPHD2	7.46787	3.019	-1.35767	4.57404e-08	2.58725e-07
LSP1	289.628	118.482	-1.34404	4.66572e-08	2.63824e-07
GALNT18	2.91642	11.0891	1.87036	4.78773e-08	2.70368e-07
MKI67	46.8922	19.2972	-1.34245	4.86142e-08	2.74349e-07
DUSP1	4.60751	17.3227	1.85851	4.91597e-08	2.77337e-07
RTTN	4.50306	1.84166	-1.35105	4.99416e-08	2.81656e-07
DOCK11	6.97843	2.86897	-1.34669	5.11673e-08	2.88191e-07
NSUN5P1	66.0143	26.7335	-1.34233	5.16895e-08	2.91036e-07
GAS8	2.1389	8.00592	1.86355	5.23996e-08	2.94938e-07
THBS4	1.25984	4.82583	1.87596	5.29653e-08	2.98025e-07
CASK	2.2571	8.50086	1.84946	5.38718e-08	3.02928e-07
MND1	13.5981	5.5094	-1.36346	5.45107e-08	3.0632e-07
CBLB	19.5431	7.99491	-1.34142	5.46262e-08	3.06869e-07
PLA2G16	18.019	7.27932	-1.35233	5.49236e-08	3.08339e-07
TSC22D1	9.28769	34.4857	1.84194	5.73278e-08	3.20998e-07
POLE2	7.32514	2.98944	-1.36007	5.79075e-08	3.24033e-07
MCM5	151.05	62.1619	-1.33401	6.05987e-08	3.38762e-07
C9orf40	4.00292	1.60557	-1.37103	6.0704e-08	3.39241e-07
RHBDF1	3.24428	12.0627	1.84416	6.1166e-08	3.41712e-07
AOC3	4.34746	1.74656	-1.35771	6.13676e-08	3.42727e-07
UXS1	9.62298	35.8419	1.83655	6.33278e-08	3.53331e-07
TEAD2	6.72577	24.957	1.8402	6.3794e-08	3.55816e-07
NOL4L	3.71399	13.6974	1.83361	6.51618e-08	3.63328e-07
MAP3K7CL	6.56965	2.66748	-1.35417	6.5989e-08	3.67583e-07
FAM129A	3.68493	13.6197	1.83184	6.60661e-08	3.67893e-07
FGD3	27.777	11.3673	-1.33254	6.69347e-08	3.72351e-07
ASPH	4.80965	17.8016	1.83281	6.69748e-08	3.72351e-07
C5orf66	3.07499	11.3263	1.84467	6.73563e-08	3.74352e-07
S100A11	196.111	721.745	1.82791	6.8137e-08	3.78568e-07
GLYCTK	6.73719	2.73402	-1.34135	6.97888e-08	3.87495e-07
GPD1L	8.27071	3.40302	-1.33756	7.02452e-08	3.89904e-07
HMGB2	267.226	110.951	-1.32759	7.1268e-08	3.95199e-07
IQCK	1.77365	6.60884	1.84407	7.19357e-08	3.98773e-07
A4GALT	4.15844	15.3628	1.83156	7.35508e-08	4.07353e-07
ACYP1	18.0023	7.27164	-1.35475	7.44571e-08	4.12087e-07
LOC401320	8.79103	3.606	-1.33482	7.46396e-08	4.12964e-07
ZNF219	4.23744	15.5092	1.82621	7.65188e-08	4.22953e-07
CUTC	24.268	9.98002	-1.33383	7.70175e-08	4.25573e-07
ADGRG1	6.64966	24.3434	1.82066	7.71106e-08	4.25894e-07
ZNF74	1.6534	6.12305	1.83729	7.71688e-08	4.25999e-07
MORC4	2.30653	8.5606	1.82836	7.74746e-08	4.2714e-07
IRF5	25.8969	10.6837	-1.32796	7.77434e-08	4.2842e-07
ZBED2	7.84844	3.22138	-1.3413	7.91574e-08	4.35581e-07
ACSL5	32.7648	13.5988	-1.32557	7.93355e-08	4.36421e-07
PAK4	5.92771	21.6378	1.81935	8.12256e-08	4.46106e-07
GRAMD3	2.82249	10.4109	1.82548	8.12626e-08	4.46167e-07
MEGF6	3.04509	11.044	1.81803	8.24092e-08	4.52318e-07
OSCP1	1.96425	7.39928	1.8636	8.2557e-08	4.52882e-07
CEBPB	3.70104	13.6074	1.83061	8.29424e-08	4.5481e-07
CD84	15.7616	6.5657	-1.32319	8.31593e-08	4.55854e-07
TRIM52-AS1	15.3226	6.23164	-1.3412	8.41932e-08	4.61374e-07
CASKIN2	1.38282	5.08022	1.83028	8.46746e-08	4.63865e-07
RRN3P3	7.67439	3.12412	-1.33734	8.62037e-08	4.72091e-07
PLXNA1	11.528	41.9957	1.81032	8.75672e-08	4.79406e-07
GAL3ST4	1.45205	5.3968	1.84078	8.85022e-08	4.84371e-07
ZEB2	12.7951	5.3269	-1.32143	8.90932e-08	4.8745e-07
CD200	8.1341	29.7704	1.81217	8.98515e-08	4.90976e-07
BTG2	139.343	57.8836	-1.31833	8.99424e-08	4.91316e-07
SDK1	1.56934	5.74874	1.81321	9.0247e-08	4.92824e-07
CNTRL	20.68	8.6359	-1.31926	9.07413e-08	4.95209e-07
TIGD7	4.12868	1.69295	-1.3418	9.37297e-08	5.10708e-07
GMIP	38.7188	16.0476	-1.31712	9.60872e-08	5.23222e-07
TICAM2	4.42042	1.82266	-1.33815	9.6713e-08	5.26297e-07
AKNA	50.22	20.8927	-1.31461	9.87328e-08	5.3661e-07
APP	36.3129	131.352	1.80014	1.00239e-07	5.44622e-07
IL18	35.5317	14.8224	-1.32092	1.01098e-07	5.48769e-07
ADAMTS14	1.36311	4.95837	1.82104	1.01812e-07	5.52475e-07
GGA2	92.7153	38.6993	-1.31272	1.02834e-07	5.5767e-07
NBPF3	1.95313	7.11264	1.80311	1.07094e-07	5.80224e-07
LOC155060	9.37443	3.8444	-1.32113	1.0856e-07	5.87611e-07
KLF11	1.54827	5.67768	1.81659	1.09761e-07	5.93739e-07
TCTN2	2.27621	8.27873	1.81403	1.10119e-07	5.95485e-07
GPR84	1.62991	6.14264	1.8591	1.11308e-07	6.0135e-07
LMNA	33.2168	119.033	1.79236	1.12504e-07	6.07618e-07
PVRL2	13.8377	49.6263	1.79247	1.15149e-07	6.20934e-07
ARMCX6	41.5609	17.3415	-1.31347	1.15403e-07	6.21914e-07
TNFRSF6B	16.3601	58.1124	1.79253	1.17193e-07	6.31358e-07
SPINT2	43.0372	153.39	1.78831	1.18682e-07	6.38985e-07
MIF4GD	44.9047	18.6708	-1.31167	1.19326e-07	6.42247e-07
PLEKHG2	17.5169	7.32305	-1.3084	1.19573e-07	6.43378e-07
ERH	269.891	113.493	-1.30739	1.20117e-07	6.46104e-07
GADD45G	3.58597	12.9662	1.80916	1.21001e-07	6.50652e-07
LOC100289561	14.9797	6.15923	-1.32733	1.21246e-07	6.5177e-07
PRR5L	2.11959	7.64999	1.79394	1.21649e-07	6.5373e-07
APOBEC3B	4.24012	15.4565	1.80582	1.21984e-07	6.5512e-07
EVI2B	66.2112	27.8631	-1.30688	1.2397e-07	6.64956e-07
PPP6R1	116.272	48.6663	-1.30524	1.2428e-07	6.66415e-07
ANXA4	12.6806	45.4271	1.78249	1.31457e-07	7.02707e-07
GOLGA8B	73.6023	30.9816	-1.30265	1.32555e-07	7.07921e-07
PIK3CB	2.56853	9.24746	1.78433	1.34106e-07	7.1576e-07
SMAP2	100.727	42.3696	-1.30117	1.38911e-07	7.40257e-07
ULK1	6.88075	24.2905	1.77488	1.44983e-07	7.71422e-07
EYA2	3.33431	11.9492	1.78608	1.46855e-07	7.8114e-07
LOC730101	2.65979	9.51512	1.78004	1.50277e-07	7.98846e-07
ICA1	2.49617	8.9057	1.78698	1.50475e-07	7.99653e-07
BTAF1	26.5966	11.3105	-1.29733	1.54677e-07	8.20463e-07
ARHGEF1	123.893	52.0529	-1.29618	1.55339e-07	8.23725e-07
NUPR1	39.7887	138.152	1.76763	1.59972e-07	8.47506e-07
RXRA	6.27098	22.1605	1.76809	1.61857e-07	8.56701e-07
STAG3L2	25.648	10.7654	-1.30046	1.62202e-07	8.58265e-07
STARD10	12.6905	44.296	1.7669	1.65646e-07	8.76217e-07
STAG3L3	31.4742	13.2547	-1.29767	1.65716e-07	8.76319e-07
LUZP6	52.0925	22.1535	-1.29427	1.65978e-07	8.77438e-07
NAV1	2.36908	8.33684	1.7663	1.67492e-07	8.85168e-07
APH1B	7.27575	3.07152	-1.3022	1.68677e-07	8.90608e-07
SIDT2	25.4467	10.7319	-1.29435	1.71725e-07	9.05591e-07
CCDC18	7.09325	2.99089	-1.30029	1.77834e-07	9.35805e-07
DOK4	2.44637	8.6814	1.77766	1.82007e-07	9.57176e-07
IFT81	1.67902	6.00514	1.78481	1.82239e-07	9.58103e-07
TLE2	2.19905	7.7391	1.77543	1.83193e-07	9.62828e-07
HOOK2	8.50046	29.6515	1.75811	1.88062e-07	9.87514e-07
ARSD	3.49102	12.1496	1.7582	1.89522e-07	9.94574e-07
MMP19	4.42547	15.5255	1.76046	1.91498e-07	1.00463e-06
IFIT2	3.10272	10.8971	1.75757	1.91657e-07	1.00516e-06
FEN1	67.3446	28.6863	-1.28794	1.95785e-07	1.02613e-06
OTUD7B	1.604	5.64229	1.75748	1.98754e-07	1.04112e-06
AXL	3.66702	12.856	1.75463	2.01065e-07	1.05258e-06
GPRC5B	3.61267	12.7078	1.75554	2.01839e-07	1.05599e-06
AATBC	1.89044	6.6124	1.75527	2.07415e-07	1.08483e-06
MYO5A	7.67509	3.2823	-1.28605	2.11421e-07	1.10545e-06
CUEDC1	2.87964	10.015	1.75217	2.1254e-07	1.11097e-06
RAB34	13.0644	45.4953	1.74906	2.13711e-07	1.11675e-06
HDAC7	59.2136	25.1812	-1.28166	2.23884e-07	1.16849e-06
SRD5A1	4.15695	14.3982	1.74955	2.25514e-07	1.17625e-06
SLC22A23	4.6671	16.2676	1.74436	2.25576e-07	1.17625e-06
PLCD1	9.90045	4.17217	-1.29092	2.27593e-07	1.18569e-06
RIC8B	1.15346	4.05181	1.75615	2.3158e-07	1.20573e-06
ATP5S	7.41933	3.11562	-1.3024	2.41054e-07	1.25091e-06
CAPN2	16.0319	55.4614	1.73688	2.41057e-07	1.25091e-06
PLK1	45.8244	19.5432	-1.27964	2.44952e-07	1.27036e-06
CHPT1	4.08589	14.3706	1.75231	2.4623e-07	1.2766e-06
LRRC48	1.30691	4.6292	1.77187	2.46441e-07	1.27731e-06
ASAP3	2.17068	7.46089	1.74003	2.56974e-07	1.3287e-06
MYEF2	7.25917	3.08018	-1.28283	2.59529e-07	1.34151e-06
NFE2L3	9.50526	33.0413	1.73298	2.59997e-07	1.34352e-06
RILPL1	2.40258	8.34291	1.74862	2.71242e-07	1.40037e-06
ANKRD13B	2.90088	9.97369	1.7363	2.76664e-07	1.42708e-06
TMEM68	2.57046	8.94928	1.74498	2.8478e-07	1.46631e-06
RPIA	24.6235	10.538	-1.27668	2.89176e-07	1.48806e-06
LINC00173	5.16717	17.7654	1.73725	2.99027e-07	1.53599e-06
CLEC2D	33.0674	14.2472	-1.26949	3.03022e-07	1.55605e-06
BCRP2	1.22638	4.29771	1.76491	3.0516e-07	1.56609e-06
ABHD6	5.81569	2.47365	-1.28816	3.08897e-07	1.58433e-06
BAIAP2-AS1	1.19875	4.13861	1.73693	3.22158e-07	1.65038e-06
ATHL1	71.4059	30.4643	-1.26639	3.22767e-07	1.653e-06
CNPY3	93.7978	40.3013	-1.26688	3.22944e-07	1.65342e-06
ARHGAP9	66.7735	28.5747	-1.26663	3.25777e-07	1.66645e-06
NFIB	2.23397	7.56815	1.71709	3.29159e-07	1.68204e-06
LRFN3	1.37241	4.75807	1.74312	3.30246e-07	1.68661e-06
ARHGEF5	2.04497	7.00668	1.71461	3.32017e-07	1.69283e-06
KCTD3	4.17932	14.3083	1.71534	3.47423e-07	1.77033e-06
ERCC2	22.5969	9.70812	-1.26653	3.52592e-07	1.79613e-06
TM4SF1	11.1542	37.9684	1.71112	3.58779e-07	1.82441e-06
FUOM	28.9958	12.4163	-1.27447	3.63818e-07	1.84949e-06
TTC23	1.69335	5.80113	1.7255	3.64666e-07	1.85325e-06
DKFZP434I0714	4.5839	1.96042	-1.28232	3.6636e-07	1.86036e-06
2017-03-09	19.5056	8.36736	-1.2649	3.66611e-07	1.86094e-06
C15orf48	4.4012	15.3521	1.74875	3.6783e-07	1.86603e-06
KIFC1	34.023	14.7578	-1.26284	3.68154e-07	1.86712e-06
PPP1R35	41.5777	17.7689	-1.26718	3.69647e-07	1.87359e-06
TPST1	1.729	6.01589	1.74143	3.77847e-07	1.91346e-06
FABP4	4.28488	1.83251	-1.33308	3.81118e-07	1.92946e-06
FDXACB1	4.16056	1.7785	-1.28104	3.85504e-07	1.95052e-06
TCF7L2	1.39429	4.77897	1.72081	3.86809e-07	1.95655e-06
RGS19	55.1586	23.7934	-1.25998	3.94768e-07	1.99563e-06
SGCE	8.04873	3.433	-1.27812	3.97044e-07	2.00655e-06
TEKT4P2	2.82069	9.80756	1.75203	3.98397e-07	2.01279e-06
UHRF2	18.9507	8.23814	-1.25908	4.13035e-07	2.08402e-06
KDM5B	4.62751	15.6226	1.69905	4.131e-07	2.08402e-06
EPSTI1	8.93829	30.2942	1.69835	4.1829e-07	2.10958e-06
ZCCHC7	18.2523	7.91336	-1.25977	4.24641e-07	2.13974e-06
MBD2	45.4406	19.8045	-1.2547	4.25601e-07	2.14394e-06
QSOX2	23.2284	10.1014	-1.25575	4.30693e-07	2.16706e-06
FNBP1	63.5413	27.6647	-1.25256	4.43008e-07	2.22707e-06
NEDD1	4.73341	16.0975	1.69495	4.51541e-07	2.26864e-06
ARHGAP11B	5.02021	2.11412	-1.30114	4.5543e-07	2.28618e-06
TYMP	80.1428	266.375	1.68952	4.5559e-07	2.28632e-06
FKBP9	7.29703	24.5868	1.69178	4.60492e-07	2.3089e-06
TTLL3	15.5156	6.69681	-1.25311	4.8201e-07	2.41398e-06
ANKRD37	10.0547	4.28392	-1.28116	4.84942e-07	2.42795e-06
MEIS1	2.02977	6.81261	1.70371	4.88843e-07	2.44606e-06
CHAMP1	13.0705	5.74187	-1.25255	4.99169e-07	2.49411e-06
PRKCE	4.09545	1.77565	-1.25803	5.03814e-07	2.51586e-06
KCNK5	1.41326	4.75612	1.69611	5.14596e-07	2.56821e-06
EDN1	1.23212	4.24397	1.71962	5.15686e-07	2.5729e-06
MSH5	13.1255	5.68662	-1.25326	5.21357e-07	2.59969e-06
SESN1	3.98201	13.3661	1.68374	5.27826e-07	2.63042e-06
TNIK	1.40099	4.76301	1.69272	5.32515e-07	2.65149e-06
LAX1	19.3035	8.4194	-1.24794	5.3903e-07	2.6816e-06
DCPS	34.0076	14.8192	-1.24899	5.40314e-07	2.68721e-06
JAZF1	10.5032	4.59463	-1.25129	5.44239e-07	2.70517e-06
CDCA3	19.8725	8.68022	-1.2506	5.44635e-07	2.70635e-06
NOTCH1	11.681	38.9417	1.67554	5.50476e-07	2.73411e-06
GLTP	13.5557	44.7176	1.67249	5.89155e-07	2.91916e-06
ZNF436	2.5377	8.45391	1.67712	5.91473e-07	2.9298e-06
GATA3	2.6657	8.8035	1.67388	5.98316e-07	2.96284e-06
STK4	25.9932	11.4769	-1.24021	6.02852e-07	2.98356e-06
TM7SF3	10.9067	36.0645	1.66831	6.15039e-07	3.03973e-06
TTC38	11.2536	4.91063	-1.24733	6.15078e-07	3.03973e-06
RCN2	9.53343	31.675	1.66859	6.3362e-07	3.12865e-06
CEACAM1	2.74866	9.13671	1.67652	6.36116e-07	3.13919e-06
GABPB1-AS1	8.17806	3.56562	-1.24405	6.61599e-07	3.26214e-06
HDAC11	1.34394	4.47024	1.69175	6.80192e-07	3.34902e-06
TEAD1	1.30275	4.31639	1.66506	6.8541e-07	3.37375e-06
PLLP	1.42621	4.84742	1.71147	6.87151e-07	3.38039e-06
S100B	6.47217	21.5868	1.6707	7.00199e-07	3.44163e-06
METRN	2.47524	8.25917	1.68464	7.08434e-07	3.48012e-06
MEX3C	17.5026	7.77411	-1.23531	7.11461e-07	3.49399e-06
EHBP1	3.05707	10.0237	1.65568	7.6373e-07	3.73683e-06
ATP2C1	13.4447	44.0584	1.6509	7.76178e-07	3.79666e-06
MMP14	30.115	98.4314	1.64927	7.85569e-07	3.84041e-06
GRB2	89.8641	39.8093	-1.22784	7.8648e-07	3.84377e-06
ROCK1	29.2022	12.9537	-1.22707	8.10223e-07	3.95644e-06
GNG2	14.4826	6.45136	-1.23052	8.10517e-07	3.95676e-06
IQCE	3.25868	10.5615	1.64817	8.31029e-07	4.0523e-06
KIAA0226	22.458	9.92764	-1.22552	8.46571e-07	4.12458e-06
SLC29A1	57.1042	25.3073	-1.22549	8.54842e-07	4.1637e-06
SLC25A45	15.3713	6.73905	-1.23109	8.56873e-07	4.17241e-06
ATM	11.304	5.0367	-1.22484	8.60779e-07	4.18906e-06
FAM189B	4.45389	14.3874	1.64731	8.67859e-07	4.22113e-06
NID1	4.19722	13.666	1.64425	8.72417e-07	4.2409e-06
GAS7	4.8488	2.15145	-1.22903	8.75067e-07	4.25139e-06
CCDC88B	45.2606	19.9748	-1.22263	8.91789e-07	4.32774e-06
SH3BP5	60.6266	26.8688	-1.22242	9.00065e-07	4.36667e-06
NTN4	1.75077	5.74921	1.65459	9.30409e-07	4.50754e-06
FAM92A1	2.73947	8.96337	1.65944	9.44023e-07	4.5722e-06
RAB30-AS1	5.30289	2.25363	-1.28628	9.55626e-07	4.6245e-06
ARHGEF39	6.248	2.76067	-1.23082	9.60525e-07	4.6469e-06
FOXRED2	3.86529	12.4532	1.63723	9.76743e-07	4.72403e-06
EXOG	8.00853	3.53105	-1.22922	9.79098e-07	4.73277e-06
SELL	49.2859	21.947	-1.21957	9.79531e-07	4.73353e-06
P3H2	1.26278	4.1608	1.65353	9.93751e-07	4.79821e-06
TSPYL2	54.9594	24.374	-1.21825	9.97481e-07	4.81487e-06
HOMER3	7.89975	25.3543	1.63567	1.00152e-06	4.83159e-06
FBXO32	1.51916	4.8434	1.63625	1.00363e-06	4.83643e-06
ATN1	20.4398	65.427	1.63071	1.00486e-06	4.84098e-06
ECHDC2	10.0305	32.0981	1.63447	1.00575e-06	4.8439e-06
MINPP1	2.37055	7.71598	1.64646	1.00821e-06	4.85443e-06
DUSP16	4.55472	14.651	1.629	1.04227e-06	5.01419e-06
PIK3R3	3.68257	11.8225	1.62985	1.06551e-06	5.11885e-06
DLL1	2.74195	8.83263	1.63404	1.06931e-06	5.13567e-06
DDX60L	2.31715	7.46594	1.62728	1.095e-06	5.25026e-06
ASRGL1	7.8023	3.45337	-1.22722	1.103e-06	5.28568e-06
TST	10.7934	34.3642	1.62874	1.13167e-06	5.41853e-06
YBX3	37.2659	118.598	1.62175	1.13386e-06	5.42603e-06
HELZ2	4.84969	15.4391	1.62137	1.14146e-06	5.45633e-06
DSE	3.49915	11.2768	1.62648	1.15005e-06	5.49435e-06
DNAL4	5.1496	16.4933	1.63193	1.15975e-06	5.53915e-06
PDXK	8.8804	28.0589	1.61884	1.17509e-06	5.60773e-06
SPIRE1	1.77621	5.73068	1.62776	1.18401e-06	5.64715e-06
GOLM1	9.1487	29.2458	1.62096	1.1885e-06	5.66702e-06
BSCL2	12.9379	40.9722	1.62111	1.19395e-06	5.68869e-06
C22orf23	1.59472	5.2146	1.65467	1.21702e-06	5.79337e-06
CRIP1	353.449	157.526	-1.2092	1.21935e-06	5.80286e-06
RNASET2	121.254	54.368	-1.20914	1.22445e-06	5.82552e-06
EZR	235.927	106.372	-1.20665	1.25285e-06	5.95407e-06
LOC389834	2.44995	7.86889	1.6187	1.2594e-06	5.98355e-06
TVP23B	9.94044	31.7127	1.61452	1.30127e-06	6.17397e-06
APOL4	3.08833	9.85434	1.61636	1.31161e-06	6.21273e-06
PPP2R3C	16.8614	7.58085	-1.21223	1.31701e-06	6.23318e-06
PPP1R13L	3.0947	9.82397	1.61638	1.3206e-06	6.24844e-06
SP110	53.4938	24.0057	-1.20591	1.32718e-06	6.27271e-06
SH3YL1	6.84041	21.735	1.612	1.37499e-06	6.48976e-06
ELMSAN1	15.3873	6.94512	-1.20396	1.38886e-06	6.55232e-06
NDRG1	34.1077	108.194	1.60479	1.40435e-06	6.62105e-06
SGOL1	6.14942	2.73853	-1.21816	1.40546e-06	6.62448e-06
CCDC85C	1.78532	5.66638	1.61142	1.44611e-06	6.80677e-06
NSUN5P2	22.796	10.1228	-1.20717	1.44728e-06	6.81041e-06
IFITM3	233.463	733.196	1.602	1.45664e-06	6.85071e-06
TMEM147-AS1	9.08304	4.02408	-1.21815	1.48511e-06	6.97698e-06
PDCD4-AS1	5.50573	2.42927	-1.22336	1.49928e-06	7.0416e-06
CCDC146	4.42286	13.8992	1.60417	1.52932e-06	7.17491e-06
DUSP5	4.81597	15.1202	1.60277	1.54374e-06	7.2386e-06
EPN2	2.7533	8.64561	1.60352	1.54616e-06	7.24798e-06
SOCS1	21.9385	68.435	1.59755	1.60809e-06	7.53005e-06
GYPC	92.4062	41.5652	-1.197	1.6234e-06	7.59972e-06
DTX2	20.9101	65.13	1.5949	1.62394e-06	7.60015e-06
E2F5	19.6063	8.83564	-1.20262	1.64823e-06	7.70756e-06
LIMA1	9.41872	29.6695	1.59418	1.6542e-06	7.7334e-06
OLMALINC	2.22801	7.21048	1.64176	1.65922e-06	7.75435e-06
LINC01311	4.80316	2.09745	-1.23851	1.6819e-06	7.85434e-06
TCTN1	3.30117	10.4197	1.60805	1.6904e-06	7.8919e-06
AASS	1.46894	4.5794	1.59844	1.71669e-06	8.01247e-06
QPCT	6.82246	3.07996	-1.21609	1.73627e-06	8.10167e-06
C21orf58	11.4972	5.17349	-1.19985	1.77389e-06	8.26824e-06
RPS25	1180.07	535.768	-1.19103	1.7757e-06	8.27441e-06
INCENP	20.4169	9.28745	-1.19369	1.77951e-06	8.28993e-06
TNFRSF12A	5.74178	18.1772	1.61235	1.78736e-06	8.32311e-06
TFG	25.5477	79.5494	1.58527	1.84327e-06	8.57537e-06
COL9A2	9.48979	29.3757	1.58627	1.8497e-06	8.60293e-06
PPP1R16A	7.78184	23.9632	1.5875	1.85751e-06	8.63696e-06
SUZ12P1	7.43297	3.26138	-1.23691	1.86625e-06	8.67288e-06
RASSF1	50.189	22.6843	-1.19079	1.89147e-06	8.78537e-06
ANP32B	240.873	109.721	-1.18814	1.90256e-06	8.82975e-06
MPP1	22.7014	10.3531	-1.19267	1.92335e-06	8.9238e-06
SPSB1	4.49482	14.0081	1.58415	1.96211e-06	9.0914e-06
TACC3	63.3704	28.9051	-1.18707	1.98162e-06	9.17438e-06
C14orf79	2.03224	6.39912	1.61105	1.99395e-06	9.22899e-06
RNASEH1-AS1	8.19161	3.64717	-1.21153	2.00356e-06	9.27099e-06
GMPR	1.54506	4.93883	1.62407	2.04306e-06	9.44869e-06
LOC100190986	60.0168	27.2894	-1.18607	2.04711e-06	9.46485e-06
ARSG	4.33978	1.94157	-1.20819	2.0894e-06	9.6552e-06
TNFSF4	1.40016	4.45173	1.60196	2.14803e-06	9.91814e-06
SLC5A6	14.7534	45.4388	1.57253	2.17981e-06	1.00541e-05
PRPSAP2	25.9207	11.841	-1.18493	2.25229e-06	1.03773e-05
DUSP14	6.74891	20.8287	1.57733	2.28612e-06	1.05219e-05
MVB12B	2.42361	7.47488	1.57277	2.31583e-06	1.06472e-05
RABGAP1L	41.7113	19.088	-1.17976	2.34555e-06	1.07782e-05
INO80C	26.4675	12.0381	-1.18759	2.35087e-06	1.07997e-05
RHOF	30.2744	13.8084	-1.18126	2.35212e-06	1.08026e-05
VMO1	1.50707	4.91827	1.66498	2.36581e-06	1.08625e-05
KCNAB2	38.2478	17.5146	-1.17797	2.42803e-06	1.11393e-05
HGSNAT	8.24353	25.1227	1.56409	2.43148e-06	1.11522e-05
UBE2E2	14.2789	6.48948	-1.18747	2.44138e-06	1.11946e-05
TCF19	24.7915	11.3935	-1.17819	2.50081e-06	1.14579e-05
MGST2	12.9184	39.909	1.56788	2.50731e-06	1.14847e-05
CNPPD1	53.3948	24.4081	-1.17687	2.519e-06	1.15351e-05
CFAP36	9.22578	28.2813	1.56437	2.58429e-06	1.18278e-05
SELP	4.71799	2.13132	-1.1894	2.62759e-06	1.20132e-05
SLC25A15	5.65632	2.5867	-1.18374	2.67841e-06	1.22391e-05
MOV10	15.9972	48.671	1.55531	2.69635e-06	1.23113e-05
C7orf55	12.5309	5.65473	-1.19028	2.70075e-06	1.23281e-05
ZNF75A	13.9653	6.40172	-1.17934	2.72244e-06	1.24238e-05
FPR3	5.31501	16.4693	1.56126	2.72977e-06	1.24506e-05
ANKH	7.92953	24.2277	1.55425	2.73862e-06	1.24877e-05
DOCK10	23.3547	10.8339	-1.17171	2.76707e-06	1.26041e-05
LOC100506100	14.257	6.41327	-1.2041	2.77713e-06	1.26465e-05
SCARB2	10.4662	32.0854	1.55122	2.86291e-06	1.30199e-05
FMNL1	55.7153	25.6095	-1.16949	2.87996e-06	1.30906e-05
FBXO33	5.66011	2.60247	-1.17701	2.91115e-06	1.32289e-05
NPIPB3	181.723	83.4587	-1.16787	2.93574e-06	1.33371e-05
BMP1	5.18869	15.7953	1.55344	2.94286e-06	1.33659e-05
PYCARD	57.5246	172.892	1.54837	2.95137e-06	1.3401e-05
ATP2B4	7.51627	22.9124	1.54734	2.98107e-06	1.35323e-05
TWF2	64.0735	29.4574	-1.16903	2.99271e-06	1.35816e-05
ZNF286A	1.87734	5.70871	1.55098	3.05349e-06	1.38392e-05
GOLGA2P5	11.2025	5.10554	-1.17567	3.09031e-06	1.3995e-05
EIF1B	38.5413	17.7601	-1.17128	3.13503e-06	1.41901e-05
GPX8	1.49517	4.58848	1.56635	3.16293e-06	1.43088e-05
LRRC75B	2.61618	8.09616	1.58558	3.16604e-06	1.43191e-05
STRA6	5.20106	15.8552	1.54916	3.20229e-06	1.44754e-05
CDC20	66.6999	30.84	-1.16508	3.25172e-06	1.4695e-05
PAQR6	4.41022	13.2509	1.54874	3.28828e-06	1.48486e-05
SH2D3A	3.29043	9.97795	1.55215	3.3025e-06	1.49011e-05
POLR1E	24.7631	11.4439	-1.16724	3.33761e-06	1.50516e-05
SERPINB9	29.0269	13.5054	-1.16316	3.37192e-06	1.51984e-05
NLRC5	48.1465	22.2199	-1.16104	3.42796e-06	1.54388e-05
TDP1	15.8565	7.36327	-1.1648	3.43071e-06	1.54472e-05
CRIM1	3.6925	11.2137	1.53664	3.54346e-06	1.5934e-05
TRIM34	16.4001	7.601	-1.16568	3.55879e-06	1.59988e-05
HES1	6.80777	20.411	1.53558	3.58866e-06	1.61288e-05
ECI2	22.6655	10.5035	-1.16571	3.62099e-06	1.62656e-05
ANP32E	45.2569	21.0979	-1.1591	3.63984e-06	1.63375e-05
MICB	13.5265	6.27765	-1.16567	3.65261e-06	1.63906e-05
DBNL	148.442	68.9356	-1.15788	3.66221e-06	1.64294e-05
LRP6	1.33684	4.04318	1.53664	3.72056e-06	1.66651e-05
PCK2	24.8794	11.5222	-1.16045	3.75061e-06	1.67953e-05
SMDT1	37.6147	17.3679	-1.1602	3.7729e-06	1.68864e-05
NFATC2IP	49.8031	23.1382	-1.15666	3.80836e-06	1.70406e-05
ABTB2	2.1262	6.432	1.53665	3.89112e-06	1.73974e-05
ENDOV	2.5343	7.64022	1.54305	3.93367e-06	1.7583e-05
MXI1	3.02485	9.07906	1.5315	3.97482e-06	1.77578e-05
DDX12P	22.5827	10.4936	-1.15603	3.99423e-06	1.78398e-05
PALLD	6.86712	20.7341	1.52562	4.03616e-06	1.80178e-05
HID1	2.94631	8.71732	1.52831	4.06531e-06	1.81432e-05
DDIT4	36.6461	108.85	1.52262	4.10102e-06	1.82931e-05
PRKCI	2.37153	7.15441	1.52938	4.18851e-06	1.86688e-05
IGFLR1	52.708	24.4162	-1.15396	4.25762e-06	1.8972e-05
PWWP2B	2.65231	7.92277	1.53374	4.3164e-06	1.9224e-05
HES6	1.56368	4.77199	1.56524	4.36438e-06	1.94226e-05
WASL	2.41641	7.23906	1.52421	4.3687e-06	1.94368e-05
C14orf142	13.5301	6.26312	-1.16453	4.42213e-06	1.96643e-05
ADRBK1	140.896	65.6724	-1.14858	4.43326e-06	1.97036e-05
TSPAN13	7.42513	22.3132	1.52022	4.45456e-06	1.97863e-05
CTSZ	474.226	222.877	-1.14817	4.45531e-06	1.97863e-05
RIN2	2.92753	8.72269	1.52178	4.50507e-06	2.00022e-05
COMMD10	11.5906	5.40833	-1.16012	4.73273e-06	2.09913e-05
EXT1	6.45757	19.1655	1.51437	4.73884e-06	2.10075e-05
RMI2	33.1999	15.5436	-1.1502	4.80821e-06	2.13041e-05
TSPAN17	12.5547	36.8681	1.51075	4.84802e-06	2.1475e-05
DAAM1	11.8206	5.58513	-1.14716	4.87102e-06	2.15713e-05
CCDC12	75.3963	35.0241	-1.14719	4.9044e-06	2.17024e-05
HLA-DQB1	384	179.829	-1.14247	5.02948e-06	2.21931e-05
TRIM16	6.24469	18.3571	1.50969	5.03253e-06	2.22009e-05
PGRMC1	12.131	35.89	1.5062	5.22357e-06	2.30024e-05
PPFIBP1	1.41372	4.18772	1.51092	5.4042e-06	2.37371e-05
E2F2	10.7401	5.04045	-1.14278	5.46793e-06	2.39987e-05
SCLY	5.56974	16.3158	1.50367	5.49564e-06	2.41142e-05
PLEKHO1	68.1556	31.9555	-1.13913	5.54053e-06	2.43049e-05
PARD6A	7.05368	3.21475	-1.1657	5.62024e-06	2.4642e-05
PIK3R2	9.42203	27.5299	1.49742	5.71838e-06	2.50341e-05
ZNF256	5.35655	2.50307	-1.15698	5.8188e-06	2.54478e-05
MAP7D3	7.78777	3.65523	-1.14238	5.82202e-06	2.54554e-05
MBNL2	3.62514	10.6828	1.49721	5.88541e-06	2.57065e-05
RRP9	29.0025	13.5495	-1.13983	5.94132e-06	2.59302e-05
PRR5	5.18261	15.0794	1.49798	6.09589e-06	2.65719e-05
STK17B	28.472	13.5182	-1.13438	6.10132e-06	2.65888e-05
UNC93B1	78.4753	36.7321	-1.13401	6.12169e-06	2.66709e-05
GPATCH11	7.78924	3.67016	-1.14066	6.17084e-06	2.68578e-05
NCALD	3.56589	10.3744	1.49387	6.243e-06	2.71582e-05
JAK1	72.767	34.6349	-1.13219	6.26109e-06	2.72284e-05
ARHGEF6	18.3058	8.70331	-1.13401	6.27207e-06	2.72639e-05
UGDH	4.54165	13.4758	1.49427	6.30848e-06	2.74153e-05
COLEC12	5.3171	2.50165	-1.14554	6.34865e-06	2.75829e-05
FHOD1	18.8043	8.84586	-1.13413	6.38466e-06	2.77254e-05
IL4R	75.9653	36.0009	-1.13104	6.44447e-06	2.79639e-05
RGS12	4.4492	12.933	1.49014	6.51293e-06	2.82396e-05
SERPINF2	3.18465	9.31543	1.49897	6.51505e-06	2.82417e-05
AFG3L1P	27.1246	12.7791	-1.13284	6.52675e-06	2.8264e-05
HSPG2	13.5295	39.1201	1.48278	6.72495e-06	2.9093e-05
TWSG1	3.57854	10.5281	1.48924	6.7598e-06	2.92364e-05
POC1A	9.39829	4.40963	-1.1398	6.83358e-06	2.95407e-05
IL17RC	2.54846	7.41355	1.49903	6.84489e-06	2.95821e-05
CDC42BPB	5.27895	15.3192	1.4827	6.85057e-06	2.95993e-05
NOL3	5.45154	15.7243	1.49167	6.92638e-06	2.98893e-05
PLK2	3.07674	8.94389	1.48761	7.0352e-06	3.03209e-05
AFAP1L2	3.23129	9.4402	1.48204	7.20717e-06	3.10155e-05
DAXX	67.5581	32.1058	-1.12562	7.28276e-06	3.13252e-05
DIRC2	1.5312	4.51108	1.50055	7.384e-06	3.17447e-05
PCDH1	1.93157	5.61364	1.49003	7.49736e-06	3.2216e-05
CNRIP1	4.12916	1.91638	-1.15241	7.58451e-06	3.25661e-05
ICAM1	41.0292	118.718	1.47271	7.64867e-06	3.28252e-05
AMOTL1	4.1943	12.1344	1.47377	7.76707e-06	3.3325e-05
SDR39U1	46.0538	21.7202	-1.12439	7.94954e-06	3.4074e-05
DTX2P1-UPK3BP1-PMS2P11	3.32317	9.6312	1.48975	7.95246e-06	3.4078e-05
ABHD17C	7.06187	20.4025	1.4753	7.95701e-06	3.4089e-05
C3	162.722	76.9705	-1.12	7.98574e-06	3.42036e-05
PLK3	20.7341	9.82509	-1.12364	8.20098e-06	3.5108e-05
VPRBP	14.5551	6.9627	-1.12115	8.22622e-06	3.52073e-05
NREP	10.8782	31.1656	1.46772	8.49127e-06	3.63091e-05
EIF2AK2	4.21093	12.1469	1.46806	8.49209e-06	3.63091e-05
CSRP2	12.5351	36.0012	1.46838	8.53187e-06	3.64701e-05
TTC7A	23.2256	11.0821	-1.11804	8.60941e-06	3.67924e-05
FAM13A	1.5082	4.33825	1.46739	9.00409e-06	3.84124e-05
SS18L2	35.7462	16.9686	-1.12224	9.05953e-06	3.86298e-05
ST8SIA4	5.99313	2.87433	-1.11966	9.11684e-06	3.88645e-05
CTRL	9.33089	4.36372	-1.13652	9.182e-06	3.91229e-05
ITSN2	23.2964	11.1751	-1.11384	9.31088e-06	3.96524e-05
IQGAP2	7.28782	3.50317	-1.11776	9.4598e-06	4.02667e-05
DCK	18.5771	8.96528	-1.11574	9.55642e-06	4.06579e-05
FGFRL1	3.97923	11.3297	1.45922	9.5853e-06	4.07707e-05
KCNA3	10.0375	4.81438	-1.11605	9.61952e-06	4.09061e-05
PCSK7	39.4228	18.8191	-1.11104	9.82682e-06	4.17567e-05
SNHG21	12.2395	5.74441	-1.13929	9.83506e-06	4.17814e-05
TJP2	5.71611	16.2745	1.45223	1.01163e-05	4.28599e-05
SCARNA9	45.5511	21.596	-1.12389	1.02321e-05	4.33292e-05
C11orf74	2.64117	7.77583	1.502	1.02583e-05	4.34081e-05
PFAS	15.2643	7.32068	-1.11009	1.03045e-05	4.35822e-05
TWF1	8.52513	24.3357	1.451	1.03645e-05	4.38145e-05
NACC2	1.85591	5.26886	1.45221	1.04479e-05	4.41452e-05
USP31	2.21017	6.29934	1.45119	1.04682e-05	4.41984e-05
ARHGAP26	3.91046	11.0787	1.44909	1.055e-05	4.4533e-05
RPL5	1191.12	574.681	-1.10568	1.06442e-05	4.48867e-05
FAM213A	10.9854	31.1419	1.45006	1.06528e-05	4.49117e-05
UBD	226.886	639.122	1.44518	1.07301e-05	4.52044e-05
OXER1	2.28329	6.53343	1.47192	1.0751e-05	4.52698e-05
MCC	1.43426	4.08637	1.4503	1.07535e-05	4.52698e-05
HMGA1	300.978	144.816	-1.10502	1.08325e-05	4.55915e-05
RHOBTB2	14.4923	6.97746	-1.10771	1.08404e-05	4.56136e-05
CIITA	69.2056	33.1734	-1.10508	1.09039e-05	4.58694e-05
RHOC	40.5809	114.396	1.44435	1.10092e-05	4.6301e-05
A1BG	6.46638	3.0657	-1.1245	1.10598e-05	4.65026e-05
HMBS	31.4988	15.111	-1.10775	1.12724e-05	4.73616e-05
UPF3A	59.1875	28.5144	-1.10282	1.16482e-05	4.88808e-05
OGT	116.932	56.7048	-1.10129	1.16663e-05	4.89449e-05
ZNF586	7.51174	3.59873	-1.11552	1.1748e-05	4.92518e-05
ZBTB25	10.0759	4.84535	-1.11493	1.18001e-05	4.94583e-05
AP3S1	45.4393	21.9606	-1.1042	1.18924e-05	4.98208e-05
SNX20	16.5788	7.99699	-1.10562	1.21499e-05	5.08254e-05
GNB5	14.7674	7.10328	-1.10384	1.22811e-05	5.13491e-05
STAB1	7.55289	21.2555	1.43553	1.22961e-05	5.13995e-05
PSPH	4.68883	13.1841	1.44421	1.23679e-05	5.16746e-05
GBP1	17.9016	50.5661	1.43477	1.23847e-05	5.17322e-05
ZNF511	42.1247	20.2639	-1.10287	1.23947e-05	5.17612e-05
AGAP2	11.0765	5.32509	-1.10216	1.24228e-05	5.18534e-05
POLR3K	56.5983	27.1826	-1.10248	1.25642e-05	5.24184e-05
SOD3	9.02086	4.29038	-1.11314	1.26135e-05	5.25984e-05
2017-09-09	190.402	92.1194	-1.09687	1.27382e-05	5.31055e-05
WDR4	18.4694	8.89722	-1.10327	1.27584e-05	5.31771e-05
RAPGEF1	55.5137	26.9305	-1.09692	1.28075e-05	5.33557e-05
SSH3	5.5513	15.5936	1.4351	1.30914e-05	5.44991e-05
NFATC2	14.6866	7.1477	-1.09721	1.31287e-05	5.46409e-05
NFIL3	4.34075	12.2788	1.43507	1.33161e-05	5.53941e-05
ZCCHC14	1.61176	4.50669	1.43145	1.35381e-05	5.62903e-05
TMC8	69.0057	33.1685	-1.09348	1.37405e-05	5.70907e-05
SIX5	2.82474	7.86253	1.43273	1.38775e-05	5.76322e-05
LAMB1	11.8326	33.0016	1.42493	1.3998e-05	5.81045e-05
RANGRF	34.6252	16.6416	-1.09856	1.40674e-05	5.83644e-05
AIP	132.236	63.8312	-1.09231	1.42471e-05	5.90958e-05
CASZ1	2.41065	6.71033	1.42576	1.44692e-05	6.00026e-05
SMARCB1	115.821	56.2757	-1.09107	1.4529e-05	6.02359e-05
PHF6	12.8529	6.29777	-1.09421	1.46169e-05	6.05861e-05
EIF3L	264.465	128.994	-1.08967	1.47159e-05	6.09815e-05
PPP1R9B	77.6965	37.8444	-1.08954	1.48447e-05	6.14413e-05
BLVRA	31.8267	88.3152	1.41994	1.5004e-05	6.20559e-05
QRICH2	1.45782	4.08109	1.43837	1.50214e-05	6.2113e-05
LRR1	12.7846	6.20427	-1.10082	1.51921e-05	6.27646e-05
ANO8	2.35696	6.51091	1.42248	1.51936e-05	6.27646e-05
CHMP4A	75.1631	36.6494	-1.08948	1.53395e-05	6.33524e-05
RNASE6	40.4927	19.7509	-1.09253	1.53987e-05	6.35814e-05
DOCK7	1.88609	5.30137	1.42123	1.54874e-05	6.39326e-05
VRK1	22.719	11.1219	-1.09255	1.55497e-05	6.41588e-05
CDK2AP1	23.3381	64.7195	1.41662	1.57156e-05	6.48123e-05
[truncated: 1,540 more rows]

## Sheet: F
Table S5F. List of differentially expressed genes in NKTCL
Gene	Expr_mean(EBV–)	Expr_mean(EBV+)	logFC	PValue	FDR
ST8SIA2	4.07584	0.00654955	-9.38095	1.02062e-252	5.27322e-249
HIF1A-AS2	20.347	0.150508	-7.03386	2.98077e-239	9.24038e-236
SOST	4.96424	0.00361298	-10.4498	1.2794e-205	1.98307e-202
KLRB1	641.008	22.6746	-4.8288	9.21089e-168	9.51791e-165
NCR2	15.2055	0.261893	-5.89763	2.83394e-163	2.74538e-160
EGFL6	37.1649	1.44933	-4.71157	1.63124e-157	1.40468e-154
RPL13AP5	40.7154	1.18617	-5.06913	4.35409e-151	3.06766e-148
BPIFB2	0.00250072	17.3079	12.6648	2.70077e-140	1.67448e-137
LILRP2	8.55976	0.302358	-4.88707	1.72697e-135	8.63483e-133
LINC00892	79.7724	3.67628	-4.40925	5.93838e-133	2.78924e-130
LOC388813	5.24312	0.109671	-5.60681	1.7784e-129	7.87576e-127
KLRF2	104.962	5.94832	-4.12826	2.0753e-126	8.04177e-124
DNER	4.15662	0.163132	-4.7018	9.55226e-120	3.365e-117
TMEM155	0.225729	19.8567	6.74331	2.60609e-113	8.4155e-111
GOLGA8O	33.1649	2.27646	-3.86623	1.94492e-112	6.1523e-110
LINC00299	4.01019	0.178366	-4.56629	1.41927e-102	3.60634e-100
IL26	4.05174	0.0798133	-5.75495	1.8827e-102	4.70675e-100
CCL20	11.3755	0.498412	-4.51883	2.55845e-102	6.29459e-100
GOLGA8N	29.7657	2.53292	-3.56567	6.01473e-97	1.29484e-94
SMIM24	21.5742	1.43885	-3.90103	1.00802e-96	2.08324e-94
SIGLEC12	11.6109	0.999235	-3.60336	7.02195e-89	1.31133e-86
CSF2	5.9433	0.276591	-4.59875	1.39737e-85	2.40658e-83
RAMP1	11.1334	0.836116	-3.7926	1.50486e-84	2.53536e-82
TMEM63C	0.132529	4.79723	5.12037	3.53443e-84	5.89072e-82
CATSPER1	4.641	0.34924	-3.72046	1.04071e-83	1.68032e-81
SATB2	0.229673	6.22756	4.77796	2.66215e-79	3.82067e-77
MMP1	50.5199	5.53506	-3.17299	3.27836e-77	4.49686e-75
GPR25	0.0330488	5.69406	7.38423	3.0546e-76	4.08158e-74
POC1B-GALNT4	5.6655	0.616042	-3.20463	1.14693e-75	1.4939e-73
TMPRSS3	14.7967	1.66119	-3.17865	4.71699e-75	6.04243e-73
RNA5-8S5	335.366	37.5106	-3.11969	1.10353e-73	1.35752e-71
LTB	121.574	15.6362	-2.97352	8.91984e-69	1.0166e-66
LINC01480	12.2059	0.90907	-3.70746	5.44232e-68	6.11275e-66
ABCA2	1.64793	22.7519	3.79929	1.22728e-63	1.2515e-61
ATP9A	0.853065	12.4947	3.88252	1.69362e-63	1.71576e-61
GSTM1	31.4847	4.25223	-2.86853	4.03536e-63	3.95874e-61
KLRF1	7.64701	0.863545	-3.14887	1.52641e-62	1.48801e-60
ELOVL4	0.661958	9.83326	4.04283	2.58556e-60	2.37138e-58
LOC729737	0.641476	8.81389	3.71784	8.93618e-60	8.05295e-58
TDO2	23.0069	3.29418	-2.80164	4.10509e-59	3.59485e-57
LOC101928100	0.54897	7.359	3.70899	2.20093e-55	1.7317e-53
TXLNGY	0.722792	8.60564	3.6435	8.9551e-54	6.90567e-52
MMRN1	19.1269	3.33101	-2.54463	6.1921e-51	4.42293e-49
CD52	543.87	94.3027	-2.52523	8.62319e-51	6.10317e-49
KLRC4	3.18584	32.5288	3.37844	1.68553e-49	1.1359e-47
ZNF667-AS1	11.1947	1.88209	-2.60482	3.4766e-48	2.23599e-46
S100B	32.3594	5.83148	-2.49651	9.29557e-48	5.83325e-46
GREB1	0.428149	4.05804	3.22685	4.4224e-47	2.72013e-45
ZNF80	0.373386	4.02461	3.44414	6.32241e-46	3.65662e-44
CCL17	4.27661	0.372318	-3.48323	4.9903e-45	2.78236e-43
LURAP1L	5.17368	0.919193	-2.52703	5.40889e-45	2.99421e-43
TMEM71	18.1573	3.42318	-2.41411	7.32867e-45	4.0425e-43
ELOVL6	36.532	7.17975	-2.35619	3.37822e-44	1.83085e-42
TBKBP1	1.3867	10.9183	3.00811	1.37697e-42	6.92957e-41
HPGD	59.8394	12.6271	-2.27205	2.8337e-41	1.35146e-39
GNLY	1315.65	278.781	-2.23036	3.56636e-40	1.63064e-38
PIEZO1	1.50992	10.4798	2.80285	1.11311e-39	4.98646e-38
LOC100190986	4.746	33.1977	2.7818	1.53767e-39	6.7903e-38
PRKY	0.695867	4.90967	2.89025	1.67678e-39	7.38357e-38
BCL9L	0.897084	6.35093	2.8116	4.57451e-39	1.98058e-37
ASXL2	1.64005	11.1323	2.7846	4.9673e-39	2.14466e-37
STAP1	39.5116	8.7716	-2.18103	2e-37	8.03108e-36
LOC100272216	0.589214	4.78881	2.90447	4.48508e-37	1.78253e-35
CIITA	4.51919	27.9175	2.63631	4.79514e-36	1.84796e-34
FCN3	4.30334	0.706081	-2.54649	5.7429e-36	2.20334e-34
CSTA	91.077	20.9264	-2.12395	1.0717e-35	4.07141e-34
LOC155060	0.623976	4.42486	2.74854	1.40794e-35	5.29686e-34
TNFRSF19	16.2668	3.727	-2.14934	2.90945e-35	1.07118e-33
PLEC	1.6737	10.062	2.58227	4.18167e-35	1.52508e-33
P2RX5	2.39654	14.8481	2.67454	5.06394e-35	1.8382e-33
WFDC21P	10.0232	1.89823	-2.39479	5.30101e-35	1.91976e-33
IL12A	0.499321	4.16584	3.17913	1.41809e-34	5.05296e-33
CETP	11.6224	2.6324	-2.14654	1.49884e-34	5.32843e-33
CDYL2	0.555787	4.07491	2.84768	3.12037e-34	1.10173e-32
LIME1	4.54731	27.5143	2.60131	5.41887e-34	1.88747e-32
KIR2DL4	165.175	40.657	-2.03295	2.00733e-33	6.80822e-32
C4A	1.7309	9.8205	2.48111	1.83931e-32	5.92708e-31
MYEF2	1.29779	7.37113	2.47774	5.90861e-32	1.84644e-30
KRT86	77.733	19.7254	-1.98231	1.04798e-31	3.23578e-30
SYNE3	0.8009	4.78455	2.56286	1.73035e-31	5.2589e-30
KLRC4-KLRK1	1.33024	7.78494	2.54197	5.27654e-31	1.58194e-29
ACE	0.856733	4.9093	2.519	8.73898e-31	2.60991e-29
D2HGDH	1.03187	5.99068	2.49421	9.63397e-31	2.87167e-29
PTPN4	16.9189	4.43046	-1.94032	1.69877e-30	5.01541e-29
STK33	1.0111	5.67977	2.56006	1.95332e-30	5.75598e-29
MMP12	36.3832	9.52858	-1.94784	3.65714e-30	1.05913e-28
LINC01000	2.72855	13.9651	2.34077	4.56563e-30	1.31538e-28
DYNLT3	53.1196	13.8207	-1.92998	5.23316e-30	1.49381e-28
BCR	1.54963	7.95941	2.3537	6.13295e-30	1.74104e-28
RAD51L3-RFFL	7.74461	1.95286	-1.96527	6.57807e-30	1.86399e-28
NCF1B	1.2323	7.25113	2.58036	7.30105e-30	2.05757e-28
SLAIN1	3.43842	17.8778	2.36625	9.84714e-30	2.75507e-28
LOC100288798	7.04593	1.43378	-2.27144	1.51721e-29	4.21448e-28
SOCS2	19.1739	5.03233	-1.92776	1.87964e-29	5.18406e-28
DAB2IP	3.70119	18.4681	2.32539	2.16393e-29	5.95754e-28
MAPK13	1.99682	9.97006	2.33268	2.90793e-29	7.93537e-28
TNFAIP2	10.1823	50.5713	2.30258	3.38564e-29	9.17437e-28
TRAPPC2B	23.444	5.882	-1.97791	4.1599e-29	1.12332e-27
HYI	8.84613	2.23617	-2.01589	5.97914e-29	1.60618e-27
LINC00957	0.603139	4.01844	2.65299	6.16465e-29	1.6503e-27
CREM	37.5997	10.0927	-1.90023	7.29317e-29	1.94234e-27
TNRC18	1.21107	5.92572	2.28728	1.08127e-28	2.84061e-27
S100A13	67.8083	18.281	-1.89546	1.95877e-28	5.09411e-27
SMG1P1	1.84086	9.01527	2.27775	2.04561e-28	5.29332e-27
GMFG	709.885	193.648	-1.86247	2.65279e-28	6.81894e-27
ATP6V0A1	2.01477	9.79462	2.28236	3.88258e-28	9.91433e-27
LUM	121.635	33.508	-1.85925	4.03536e-28	1.02875e-26
KRT81	128.144	35.5243	-1.85874	4.2666e-28	1.08592e-26
TTLL3	3.52625	16.6652	2.2267	1.24823e-27	3.09066e-26
LILRB5	1.38499	6.99534	2.3906	1.66114e-27	4.08692e-26
AHNAK	18.1304	82.6019	2.20577	2.50846e-27	6.12301e-26
DPT	1.30547	6.78269	2.45991	2.62883e-27	6.38664e-26
LINC01347	1.35825	6.64544	2.24067	3.47912e-27	8.39973e-26
TYROBP	921.243	263.352	-1.8145	6.33005e-27	1.52117e-25
SMG1P3	1.90217	8.77867	2.19743	9.12155e-27	2.17849e-25
SLC17A9	0.96264	4.81145	2.33067	1.39742e-26	3.29681e-25
ZBED6	2.0008	9.43943	2.19454	2.72801e-26	6.32997e-25
TMEM200A	28.6023	8.23989	-1.80406	3.19954e-26	7.3799e-25
AAMDC	23.8842	6.44773	-1.88742	5.83543e-26	1.31658e-24
CAPN12	5.95173	1.66827	-1.84922	8.37857e-26	1.87129e-24
TEX30	56.319	16.2334	-1.78852	9.37533e-26	2.0849e-24
ANKRD36BP1	2.84422	13.0724	2.15636	2.31244e-25	5.04118e-24
ZCCHC11	3.97786	17.1641	2.11251	2.67024e-25	5.80486e-24
CCL19	493.656	146.625	-1.75306	3.61159e-25	7.78576e-24
KDM5D	1.69849	7.09386	2.12196	6.57607e-25	1.38811e-23
LST1	138.234	41.5292	-1.75375	7.28637e-25	1.53241e-23
LOC100506100	29.2081	8.28555	-1.81316	1.18408e-24	2.45693e-23
ZNF32	35.7081	10.5595	-1.7609	1.43496e-24	2.95377e-23
C11orf74	11.3193	3.10253	-1.86357	2.92337e-24	5.94648e-23
SNHG4	1.07084	5.5217	2.4	3.21362e-24	6.51125e-23
TRIO	1.38509	5.82923	2.05724	3.36778e-24	6.80582e-23
SYNE2	3.17834	13	2.04321	4.64111e-24	9.29422e-23
ARHGAP10	2.62355	10.8968	2.08967	5.32496e-24	1.06089e-22
LOC643733	40.4435	11.8643	-1.74984	8.15163e-24	1.6014e-22
BRPF3	2.09313	8.6375	2.04049	8.24334e-24	1.61736e-22
ZNF880	4.34625	1.22078	-1.83214	9.34162e-24	1.82591e-22
ZC3H12C	1.10151	4.58355	2.07347	1.10601e-23	2.15366e-22
GZMA	1784.89	546.221	-1.6943	1.16739e-23	2.26749e-22
CLEC2B	79.8384	24.6405	-1.69507	1.75468e-23	3.37858e-22
ID2	526.845	164.07	-1.68397	2.34133e-23	4.49142e-22
FUCA1	96.6738	30.532	-1.6886	2.36565e-23	4.53245e-22
ARPC4-TTLL3	4.33261	17.3296	2.00216	3.5901e-23	6.80317e-22
TNFRSF11B	4.13473	1.16748	-1.81334	3.83733e-23	7.25349e-22
LRP1	2.76775	11.0683	1.99603	4.01666e-23	7.5648e-22
LINC00493	95.6357	29.4998	-1.68826	7.31489e-23	1.36111e-21
B4GALT6	4.87028	1.49615	-1.72063	8.1758e-23	1.51585e-21
LOC100132062	2.1772	8.75687	1.97784	8.84605e-23	1.63425e-21
CD69	107.151	33.9104	-1.6548	1.87107e-22	3.40395e-21
PLEKHG4	1.6865	6.5198	1.97965	2.42099e-22	4.39407e-21
RMRP	6.29285	1.15059	-2.37856	2.47363e-22	4.47911e-21
LRFN4	0.972307	4.11138	2.06191	6.63238e-22	1.18435e-20
ZNF496	1.73118	7.04047	1.9955	7.57303e-22	1.34458e-20
LOC100288069	2.05656	8.66106	2.00694	7.82009e-22	1.38686e-20
TPD52	28.4673	9.18044	-1.63081	9.46622e-22	1.66735e-20
NCF1C	5.44814	21.2693	1.97079	1.06796e-21	1.87468e-20
RAB33A	33.214	10.5488	-1.64775	1.17211e-21	2.04822e-20
IGFBP7	440.332	143.299	-1.61056	1.9538e-21	3.36115e-20
MARCO	10.113	37.5191	1.91908	2.05394e-21	3.5256e-20
MGST2	67.4747	21.8148	-1.62958	2.18393e-21	3.74044e-20
ZBTB32	1.11786	4.64355	2.07789	2.68875e-21	4.58983e-20
COX6C	359.595	117.572	-1.60292	3.27518e-21	5.57248e-20
CCDC64	2.9483	11.0056	1.91682	3.46227e-21	5.87789e-20
TMEM150B	1.29216	5.94985	2.15859	4.90562e-21	8.18484e-20
BSCL2	25.8012	8.43226	-1.61656	5.13109e-21	8.54263e-20
RAMP3	30.8745	10.1545	-1.61278	8.20027e-21	1.34787e-19
SEC61B	327.56	108.494	-1.58689	9.58674e-21	1.56251e-19
RASA4CP	1.09222	4.66392	2.06593	9.77766e-21	1.59195e-19
PFDN5	880.911	293.615	-1.57915	1.16007e-20	1.87498e-19
SEC31B	7.77213	28.3041	1.85471	1.41038e-20	2.2748e-19
RRAS2	63.9455	21.0742	-1.57993	1.61757e-20	2.60087e-19
HOPX	333.918	111.692	-1.57454	1.62528e-20	2.61056e-19
LPAR1	11.5779	3.84437	-1.60216	1.7166e-20	2.74868e-19
LOC100505915	3.50552	12.9315	1.85136	2.01688e-20	3.21291e-19
IPO11-LRRC70	11.4735	3.70018	-1.62251	2.36477e-20	3.74377e-19
MORN2	17.233	5.41253	-1.65385	2.98302e-20	4.68933e-19
FRG1B	2.63019	10.2718	2.00392	3.47849e-20	5.43514e-19
DYNLT1	215.534	73.1393	-1.56321	3.87618e-20	6.02012e-19
LOC100131564	2.65288	9.60135	1.83989	4.13446e-20	6.40201e-19
COX7A1	8.70994	2.56182	-1.731	4.16637e-20	6.44488e-19
LINC00152	141.932	47.4716	-1.57008	4.17046e-20	6.44488e-19
TRIM56	3.32525	11.9305	1.83145	4.8607e-20	7.44475e-19
KCTD17	20.6966	7.062	-1.5772	7.18497e-20	1.09291e-18
G0S2	28.383	9.57499	-1.58428	8.78585e-20	1.33249e-18
RBM5-AS1	3.52775	13.1687	1.84609	9.30735e-20	1.40883e-18
CDC26	99.2822	33.59	-1.55285	9.72806e-20	1.47107e-18
FAM101B	6.87755	2.33653	-1.58153	9.93349e-20	1.50067e-18
RASGRP2	4.71593	16.4794	1.82484	1.26371e-19	1.90354e-18
RPL35	2350.24	804.255	-1.53304	1.48536e-19	2.22017e-18
DDX3Y	6.82057	23.0549	1.80513	1.62454e-19	2.41654e-18
SLMO2-ATP5E	3.19768	12.1191	1.92598	2.08044e-19	3.07699e-18
FBXO25	12.0635	4.10987	-1.56329	2.35611e-19	3.46487e-18
MYL6	1639.21	569.705	-1.52208	2.70652e-19	3.97263e-18
CLEC4A	24.5699	8.32038	-1.56792	3.03156e-19	4.43294e-18
MCEE	19.377	6.36679	-1.58859	3.05511e-19	4.46317e-18
SPON2	1.44456	5.445	1.90728	3.60735e-19	5.24029e-18
CDC42BPB	1.20765	4.26974	1.79374	3.87205e-19	5.60381e-18
NLRC5	11.4217	38.8331	1.77546	3.88647e-19	5.61943e-18
HELZ2	2.25958	7.7179	1.7822	4.0148e-19	5.7915e-18
CAPG	258.459	91.3393	-1.51751	4.01668e-19	5.7915e-18
OSTF1	234.89	82.5888	-1.51502	4.61141e-19	6.61822e-18
NOP10	303.934	105.379	-1.51799	4.68448e-19	6.71688e-18
GSPT2	6.10399	2.09107	-1.57435	5.11071e-19	7.30774e-18
IFFO2	2.67119	9.07887	1.79242	5.33406e-19	7.61307e-18
BRCA2	1.589	5.47433	1.77621	5.97627e-19	8.43645e-18
PRADC1	28.5164	9.69434	-1.54245	6.05947e-19	8.53834e-18
NQO1	11.1607	3.84506	-1.53726	8.69392e-19	1.21074e-17
ST5	1.55291	5.58559	1.80851	8.82063e-19	1.22509e-17
ENTPD5	1.08968	4.13813	1.8928	9.41265e-19	1.30381e-17
AGRN	1.18853	4.0644	1.77048	1.28538e-18	1.76157e-17
TPCN1	2.7614	9.36472	1.75575	1.54385e-18	2.1102e-17
CD300A	52.2679	18.6011	-1.49986	1.59817e-18	2.18253e-17
KIF21B	7.72342	25.4306	1.72945	2.37392e-18	3.20799e-17
OBFC1	15.8264	5.64347	-1.49074	2.50275e-18	3.37164e-17
UGCG	45.3484	16.3305	-1.48171	3.15663e-18	4.21791e-17
TIAF1	10.3037	3.59135	-1.52435	3.42788e-18	4.56855e-17
KDELR3	7.59036	2.56431	-1.55934	3.66665e-18	4.86584e-17
HTATSF1	102.642	37.0352	-1.47326	4.43599e-18	5.84179e-17
PRDM8	2.60986	8.60135	1.74621	4.79084e-18	6.28772e-17
NDUFB2	269.053	96.1475	-1.47574	4.86255e-18	6.37645e-17
ATP1A3	3.27129	10.696	1.73316	5.19577e-18	6.8019e-17
C2orf74	51.96	18.4155	-1.48506	6.92303e-18	8.97215e-17
NFYC-AS1	1.29419	4.50802	1.75248	7.0394e-18	9.11535e-17
MRPL21	91.1047	32.5893	-1.47669	7.30838e-18	9.43999e-17
NUDT14	11.0406	3.80072	-1.57628	7.48179e-18	9.63187e-17
ZNF316	2.07761	6.82298	1.7113	7.48945e-18	9.63373e-17
LINC01410	1.64728	5.52557	1.7779	9.19795e-18	1.17825e-16
THRIL	1.99073	6.95651	1.75374	9.7284e-18	1.24517e-16
ZAP70	24.3048	76.9921	1.69511	1.09715e-17	1.39735e-16
FCER1G	1065.04	393.001	-1.44692	1.61297e-17	2.02766e-16
CHCHD1	82.1787	29.6373	-1.45585	2.0287e-17	2.52773e-16
APLNR	8.35824	2.97707	-1.48171	2.19926e-17	2.73365e-16
CETN2	64.6908	23.7188	-1.44322	3.82089e-17	4.66697e-16
NBPF10	1.94687	6.25561	1.65905	3.91617e-17	4.77207e-16
LMO4	30.6768	11.2275	-1.43414	3.9809e-17	4.84332e-16
NDUFA8	90.861	33.2604	-1.43986	4.21052e-17	5.11867e-16
MRPL20	225.946	83.1421	-1.43269	4.23015e-17	5.1385e-16
SAMD1	3.47977	11.4066	1.69885	5.24036e-17	6.33585e-16
PLCG1	10.8511	34.1706	1.65085	5.34023e-17	6.43652e-16
PPAP2A	28.2093	10.4101	-1.43866	6.88869e-17	8.2261e-16
STBD1	9.63057	3.55492	-1.45011	8.33027e-17	9.84891e-16
ATP8B4	22.9221	8.65469	-1.41952	9.12273e-17	1.07612e-15
LRCH3	2.30156	7.55534	1.69073	9.56293e-17	1.12548e-15
FCRL3	3.3426	10.4885	1.662	1.02573e-16	1.20355e-15
STXBP1	1.26999	4.10823	1.68674	1.14703e-16	1.34282e-15
TCEAL4	32.7144	12.1742	-1.43025	1.16722e-16	1.36337e-15
PLEKHF1	43.426	16.3663	-1.41841	1.2239e-16	1.42635e-15
LSM3	205.115	76.4453	-1.41249	1.25125e-16	1.45713e-15
ODF3B	2.68567	9.00047	1.7894	1.69588e-16	1.95727e-15
ISG15	223.464	84.0809	-1.40551	1.74096e-16	2.00631e-15
OST4	512.347	193.712	-1.3934	2.79933e-16	3.19276e-15
EPHB4	1.44001	4.52941	1.64835	3.09531e-16	3.50784e-15
KIF13B	2.34411	7.15992	1.61025	3.85225e-16	4.33938e-15
CC2D1A	2.97305	9.13953	1.61468	3.86721e-16	4.35307e-15
ELL3	4.9297	1.74436	-1.47732	4.13671e-16	4.64631e-15
C12orf57	132.819	50.7378	-1.3874	4.96062e-16	5.53163e-15
TMEM204	9.49882	3.55521	-1.43157	5.33252e-16	5.91654e-15
USP28	5.38114	16.269	1.59777	5.53482e-16	6.13661e-15
POLR2J2	1.50474	4.93634	1.68628	5.60738e-16	6.21261e-15
HACD2	3.09207	10.0002	1.67021	5.84019e-16	6.46592e-15
EVI2A	70.3871	27.0986	-1.37872	6.15629e-16	6.81102e-15
SH2D1B	89.1461	34.3949	-1.37685	6.54093e-16	7.19549e-15
PFKFB3	9.47141	28.5707	1.59018	7.00653e-16	7.6913e-15
LRP12	6.49245	2.4869	-1.40794	7.22695e-16	7.92205e-15
RGP1	1.58988	5.21635	1.68071	9.60145e-16	1.0429e-14
GTF2I	15.6006	46.6661	1.57143	1.06442e-15	1.15213e-14
NSMF	2.94328	8.804	1.59664	1.09791e-15	1.18672e-14
CYTIP	127.49	49.593	-1.36361	1.20129e-15	1.29575e-14
LYST	7.98043	23.4624	1.56961	1.20921e-15	1.30339e-14
HMGA1	32.3601	94.0767	1.56794	1.40881e-15	1.50664e-14
PPP3CA	27.9841	10.8127	-1.36427	1.40944e-15	1.50664e-14
TSPAN5	27.0293	10.4812	-1.3664	1.45585e-15	1.55197e-14
ATP5I	425.371	164.085	-1.36115	1.54797e-15	1.64565e-14
TTC32	12.7487	4.66178	-1.44371	1.59209e-15	1.68792e-14
VIM-AS1	12.5214	4.75726	-1.40535	1.86948e-15	1.97122e-14
LDB2	15.7732	6.07212	-1.37407	1.88252e-15	1.98362e-14
NLRP1	6.38809	18.8472	1.55942	1.91573e-15	2.01451e-14
FGFR1	2.66636	7.93313	1.56682	2.05261e-15	2.15114e-14
RAB11FIP3	3.11056	9.27413	1.56651	2.12859e-15	2.22777e-14
ANAPC13	81.1932	31.5671	-1.35631	2.1809e-15	2.27943e-14
CXCL1	7.98438	2.89168	-1.45064	2.19912e-15	2.29693e-14
DAPK2	27.9099	10.8983	-1.35658	2.78008e-15	2.88428e-14
NDUFC2	48.9109	19.0874	-1.34994	2.89699e-15	3.00156e-14
F2R	27.1212	77.9891	1.54043	3.77948e-15	3.88217e-14
NFATC3	73.6523	28.8242	-1.33853	3.83332e-15	3.93226e-14
PTCD1	1.41131	4.26088	1.5422	3.88608e-15	3.97848e-14
SIGLEC1	7.01808	20.1997	1.54134	4.28919e-15	4.36523e-14
CLEC12A	49.7022	19.8058	-1.34513	4.80229e-15	4.87781e-14
MVB12B	4.50615	13.2066	1.53865	5.10661e-15	5.17642e-14
COX16	41.9513	16.4486	-1.34358	5.10963e-15	5.17642e-14
BCL7C	34.9422	13.5748	-1.35142	5.96727e-15	6.00992e-14
ATP13A2	5.19147	15.2269	1.53067	6.07038e-15	6.1098e-14
RAD54L2	1.35173	4.07008	1.5516	6.66961e-15	6.69986e-14
NDUFB11	114.796	45.4687	-1.33101	7.07425e-15	7.09714e-14
LTB4R2	1.2519	4.12103	1.63522	7.25336e-15	7.26837e-14
TMEM141	58.4417	22.9965	-1.34068	7.38699e-15	7.39176e-14
LOC729348	4.44648	13.1648	1.531	7.46919e-15	7.46919e-14
SF3B5	155.102	61.4614	-1.3303	7.47484e-15	7.47002e-14
CSRP2	19.0783	7.3447	-1.37324	7.89352e-15	7.86814e-14
EDF1	470.184	187.665	-1.32329	8.24097e-15	8.18814e-14
RNF216	3.76781	10.8173	1.52511	8.76841e-15	8.70105e-14
PMS2P9	2.26484	6.80162	1.55246	8.85058e-15	8.77696e-14
SLX1A-SULT1A3	3.44116	10.1531	1.52409	8.91062e-15	8.83086e-14
APOM	6.22149	2.08679	-1.51397	8.9946e-15	8.89702e-14
BTN3A1	18.8443	53.9326	1.51414	9.38937e-15	9.28159e-14
ZNF302	24.955	9.89265	-1.3312	9.81849e-15	9.68724e-14
ANGEL1	3.4153	9.82723	1.53023	1.00441e-14	9.90351e-14
LAIR2	19.5665	7.61551	-1.38145	1.10937e-14	1.09107e-13
STX8	77.7075	30.9072	-1.32486	1.1879e-14	1.16608e-13
NUCB2	266.293	106.55	-1.30963	1.52985e-14	1.48776e-13
NDUFAF2	54.6619	21.5686	-1.33034	1.53787e-14	1.49354e-13
LOC100133331	2.62007	7.57269	1.50249	1.56562e-14	1.5186e-13
THY1	35.3432	14.2813	-1.31706	1.61828e-14	1.56673e-13
PSMA4	430.819	173.576	-1.30789	1.63256e-14	1.57957e-13
SREBF1	3.57325	10.2242	1.50836	1.66895e-14	1.61276e-13
VPS9D1	2.41333	7.01668	1.55742	1.71167e-14	1.65096e-13
PIGY	137.884	55.5462	-1.30955	1.74813e-14	1.68193e-13
PCED1A	7.00876	20.052	1.50326	1.80687e-14	1.73522e-13
XRCC4	19.4712	7.73767	-1.32834	2.08838e-14	1.99444e-13
OSTC	247.347	99.6215	-1.3035	2.16719e-14	2.06844e-13
PTPRM	3.61375	10.1306	1.50171	2.41198e-14	2.29219e-13
SS18L2	98.2656	39.2408	-1.3073	2.6069e-14	2.47138e-13
GNGT2	42.8881	17.1887	-1.30755	3.96939e-14	3.69301e-13
GMIP	11.2768	31.2193	1.47632	4.12629e-14	3.83668e-13
NIPAL2	1.42521	4.29144	1.57033	4.16361e-14	3.86674e-13
TNFAIP8L2-SCNM1	7.8792	3.12482	-1.34311	4.41787e-14	4.09306e-13
HDDC2	54.8558	22.1099	-1.29354	4.66121e-14	4.31079e-13
C10orf11	9.17849	3.56459	-1.38501	5.36482e-14	4.935e-13
TTC28-AS1	17.0565	6.81679	-1.31983	5.83974e-14	5.34965e-13
SCARB1	4.28791	12.0315	1.47408	6.67138e-14	6.07915e-13
ARSG	2.99213	8.32843	1.52471	7.01734e-14	6.38101e-13
PIR	4.18361	1.58487	-1.40978	7.05389e-14	6.40887e-13
PXYLP1	4.72685	12.7726	1.47842	7.29963e-14	6.6205e-13
TNFAIP8L2	55.0563	22.5664	-1.28707	7.37955e-14	6.67735e-13
BANK1	10.1311	4.108	-1.30134	7.58925e-14	6.85939e-13
TNFRSF10B	8.95994	24.6449	1.45864	7.65584e-14	6.91524e-13
ATP8A1	10.0507	27.198	1.45665	8.02114e-14	7.22415e-13
CTSW	542.976	224.183	-1.27067	8.99188e-14	8.06097e-13
GPR18	40.3464	16.5894	-1.28318	9.1293e-14	8.17943e-13
LOC100289561	1.33796	4.30466	1.63045	9.2168e-14	8.24829e-13
PIAS2	2.95372	8.0085	1.47604	9.9399e-14	8.8647e-13
ADAT1	4.0345	11.1463	1.46015	9.96872e-14	8.88529e-13
DMWD	2.01513	5.71139	1.47807	1.07301e-13	9.54747e-13
CLUHP3	1.48025	4.4505	1.52213	1.08625e-13	9.65972e-13
KCNAB2	17.2639	46.5095	1.44734	1.09296e-13	9.71378e-13
HPSE	7.96544	3.25435	-1.28924	1.10952e-13	9.85535e-13
HIST1H1C	61.9405	25.4591	-1.28333	1.11225e-13	9.87392e-13
CKLF	194.274	80.4795	-1.27017	1.12391e-13	9.97171e-13
CFI	12.9746	5.26857	-1.29591	1.14483e-13	1.01457e-12
SBNO2	7.2835	20.103	1.44472	1.17154e-13	1.03765e-12
ZNRD1	79.3792	32.4177	-1.27649	1.19594e-13	1.05865e-12
DNAJC11	5.54906	15.2047	1.44952	1.27176e-13	1.12193e-12
MAP2K6	14.6435	5.95681	-1.28793	1.56703e-13	1.37459e-12
DGKQ	3.39237	9.31221	1.44208	1.57759e-13	1.38307e-12
IMMP1L	15.5649	6.15223	-1.32412	1.7772e-13	1.55455e-12
PCNXL2	1.96727	5.35492	1.44213	1.81498e-13	1.58313e-12
POLR2G	212.571	88.5458	-1.2578	1.89869e-13	1.65335e-12
PIN4	31.6365	12.9628	-1.27272	1.94238e-13	1.68666e-12
TMEM44	1.8285	5.18243	1.4912	2.05303e-13	1.78074e-12
ZNF181	8.02457	3.28523	-1.28755	2.21261e-13	1.91274e-12
FOXP1	12.7886	5.29941	-1.25747	2.42093e-13	2.08585e-12
CCDC23	35.9972	14.8175	-1.27291	2.85212e-13	2.44648e-12
GTF2IRD2B	2.06954	5.71367	1.4552	3.04425e-13	2.60408e-12
LOC100132111	1.30792	4.36933	1.6213	3.07761e-13	2.63116e-12
TRERF1	6.29665	16.7976	1.42036	3.19895e-13	2.73189e-12
TBC1D31	23.1784	9.78181	-1.25142	3.26183e-13	2.78099e-12
RAB30-AS1	12.1572	4.77746	-1.33868	3.62983e-13	3.08118e-12
PRKAR1B	2.04235	5.59994	1.47776	4.00534e-13	3.37773e-12
ABLIM1	6.97331	18.2359	1.41043	4.27184e-13	3.59465e-12
KIAA1147	6.097	15.9985	1.40949	4.45088e-13	3.72911e-12
ORMDL2	52.1004	21.9696	-1.24233	5.22751e-13	4.34226e-12
POLQ	2.46326	6.54202	1.4052	5.55549e-13	4.60236e-12
SUB1	208.554	88.6979	-1.22794	6.14936e-13	5.06995e-12
MMAB	8.05126	3.37304	-1.25126	6.22432e-13	5.12902e-12
H6PD	3.77122	9.95352	1.40029	6.26831e-13	5.16253e-12
TOR1A	71.5838	30.527	-1.23166	6.33265e-13	5.21275e-12
RUNX1	7.22747	18.8216	1.40093	6.53871e-13	5.37666e-12
TRIQK	6.59318	2.76887	-1.26035	6.58334e-13	5.41049e-12
TCEB2	166.924	71.1779	-1.23086	7.03771e-13	5.76862e-12
DGKZ	20.7933	54.5273	1.39036	7.55207e-13	6.1739e-12
RASA4	4.52025	11.8833	1.39681	7.95094e-13	6.48288e-12
PPIB	713.121	304.764	-1.22111	8.30986e-13	6.76485e-12
FOXD2-AS1	1.97691	5.35064	1.43799	8.84629e-13	7.19022e-12
MTA1	7.80251	20.4676	1.39067	8.91286e-13	7.23295e-12
PRKCA	2.08123	5.39438	1.3966	9.9381e-13	8.04389e-12
C10orf35	5.24968	2.05002	-1.35057	1.01586e-12	8.20947e-12
ZBTB40	2.69783	7.12011	1.38401	1.04129e-12	8.41063e-12
NEXN	4.78091	2.0004	-1.26515	1.04693e-12	8.44736e-12
LDOC1L	2.21327	5.82501	1.40271	1.05438e-12	8.50303e-12
ANAPC10	22.3435	9.4305	-1.23847	1.10687e-12	8.90321e-12
COPS4	62.8451	26.9442	-1.21934	1.17808e-12	9.46129e-12
PSMB7	231.924	99.5823	-1.21493	1.20257e-12	9.65296e-12
NCOR2	4.22337	10.9804	1.37971	1.24538e-12	9.97073e-12
KLF2	4.36935	11.6335	1.42517	1.2856e-12	1.02715e-11
CCDC107	18.0385	7.62678	-1.24535	1.31722e-12	1.05085e-11
NLRX1	2.12926	5.63111	1.40376	1.31729e-12	1.05085e-11
LPAR2	9.58789	24.5512	1.38611	1.38219e-12	1.09866e-11
MRPL50	63.8033	27.2354	-1.22031	1.38835e-12	1.103e-11
ATP6V1G1	124.277	53.7045	-1.21216	1.40331e-12	1.11431e-11
COA3	83.7716	35.6882	-1.21969	1.42706e-12	1.13143e-11
VAMP8	288.215	125.346	-1.21082	1.46473e-12	1.15833e-11
TTC14	14.7833	38.0491	1.37198	1.53222e-12	1.21047e-11
ZC3H13	5.75101	14.9191	1.37456	1.56315e-12	1.23302e-11
CLDN15	3.43212	9.21657	1.38864	1.58995e-12	1.25289e-11
ABRACL	156.047	67.0965	-1.20684	1.87077e-12	1.46895e-11
BLOC1S1	193.47	83.7791	-1.20528	2.10786e-12	1.64593e-11
APOO	29.8397	12.6618	-1.22222	2.15008e-12	1.67806e-11
EBP	82.5366	35.3232	-1.20607	2.18068e-12	1.70108e-11
MKNK2	10.9704	28.389	1.35807	2.48252e-12	1.93168e-11
STAT4	64.3447	27.934	-1.19922	2.51207e-12	1.95117e-11
NT5DC2	5.01438	12.892	1.38985	2.51261e-12	1.95117e-11
PLBD2	3.59378	9.48085	1.3779	2.52992e-12	1.96363e-11
MAN2C1	7.01153	18.0111	1.3563	2.81604e-12	2.17482e-11
PARP10	11.5077	29.5129	1.35372	2.81891e-12	2.17595e-11
SREK1IP1	7.91337	3.40794	-1.2057	2.93748e-12	2.25736e-11
UBR4	4.96259	12.6345	1.34917	3.08138e-12	2.36209e-11
SMIM19	84.3327	36.4148	-1.19848	3.30022e-12	2.51988e-11
CCDC130	5.71433	14.8243	1.36074	3.4118e-12	2.59995e-11
VEGFA	4.36569	11.2115	1.36338	3.42088e-12	2.60558e-11
ZSWIM6	4.27687	10.8951	1.35777	3.58558e-12	2.72701e-11
ITSN2	6.29888	16.0239	1.34753	3.76186e-12	2.84711e-11
BEX4	20.0052	8.66773	-1.21539	4.12549e-12	3.11017e-11
BLOC1S2	51.3956	22.4964	-1.18818	4.24009e-12	3.19036e-11
HSD17B11	72.6367	32.0557	-1.18782	4.33459e-12	3.25672e-11
GOLIM4	8.42782	21.4527	1.3489	4.44641e-12	3.33911e-11
TARSL2	9.17268	3.99235	-1.20645	4.57233e-12	3.42207e-11
IER3IP1	76.3357	33.3905	-1.18512	5.03627e-12	3.76204e-11
TOMM6	194.013	84.8523	-1.18248	5.12836e-12	3.82714e-11
SEMA7A	4.31547	10.8848	1.34932	5.27803e-12	3.93315e-11
PIK3R2	2.63271	6.66625	1.35296	5.74969e-12	4.27845e-11
GAS7	5.20584	12.9539	1.33656	5.77126e-12	4.29039e-11
YEATS2	4.85317	12.2327	1.33348	5.96311e-12	4.42664e-11
RPS4X	2528.45	1115.57	-1.17323	6.3419e-12	4.6921e-11
EP300	5.48203	13.7612	1.32526	7.33623e-12	5.40454e-11
ARHGEF11	2.20299	5.58913	1.33816	7.44582e-12	5.48006e-11
CCL14	40.7372	17.6026	-1.2027	7.66592e-12	5.63404e-11
BID	31.7297	14.0026	-1.17589	8.95618e-12	6.56053e-11
NIPSNAP3A	37.1293	16.4681	-1.17623	9.27519e-12	6.77819e-11
IFT27	18.173	7.89195	-1.20039	9.99416e-12	7.27958e-11
RPS19	1540.41	683.648	-1.16174	1.03874e-11	7.54122e-11
ITGA1	34.8683	15.5171	-1.16499	1.08674e-11	7.87123e-11
TMSB4X	7016.12	3128	-1.16019	1.0896e-11	7.8883e-11
PON2	23.485	10.4056	-1.1787	1.13662e-11	8.21718e-11
UQCC2	49.2011	21.6785	-1.16722	1.28094e-11	9.21326e-11
SLC18B1	8.02472	3.54791	-1.19209	1.42506e-11	1.02025e-10
MSRA	9.05965	3.98968	-1.20801	1.54638e-11	1.10354e-10
LAX1	6.43041	15.9852	1.31171	1.5665e-11	1.11738e-10
TNPO2	6.18616	15.2865	1.3043	1.58223e-11	1.12757e-10
BCCIP	96.5691	43.0834	-1.15181	1.86814e-11	1.3222e-10
LOC103091866	2.86404	7.47617	1.34947	1.91052e-11	1.35096e-10
LOC283070	6.53375	2.83815	-1.19121	2.07313e-11	1.45995e-10
PDCL3	73.5385	32.9057	-1.1527	2.1727e-11	1.52591e-10
FUNDC1	28.5719	12.669	-1.16422	2.32225e-11	1.62358e-10
IL33	37.8125	17.0249	-1.1489	2.35578e-11	1.64554e-10
MPC2	38.0246	16.9838	-1.14927	2.3812e-11	1.6618e-10
BZW1	270.559	122.44	-1.14148	2.43657e-11	1.69891e-10
IGF2R	10.7783	26.4238	1.28639	2.48785e-11	1.73155e-10
DYNC2LI1	12.1629	5.34431	-1.18544	2.51074e-11	1.74592e-10
ZNF585A	18.3578	8.20932	-1.16187	2.5915e-11	1.79884e-10
HDAC10	5.80423	14.3182	1.28993	2.75159e-11	1.90231e-10
ARHGAP35	3.14503	7.67796	1.28922	2.80712e-11	1.93983e-10
EIF1AX	75.1806	33.9803	-1.13873	2.88473e-11	1.9908e-10
EIF4G1	22.2335	53.8194	1.2789	3.13348e-11	2.15575e-10
MSH5	2.59142	6.47397	1.30547	3.28375e-11	2.25472e-10
NCR3	47.3915	21.4727	-1.146	3.44272e-11	2.35803e-10
LMTK2	2.07685	5.0658	1.28677	3.654e-11	2.49612e-10
TMEM63B	2.55338	6.31164	1.29615	3.7094e-11	2.53174e-10
DUSP6	59.2059	26.9951	-1.13242	3.93676e-11	2.68455e-10
SATB1	6.47389	15.6019	1.27996	4.08844e-11	2.78308e-10
CD84	6.49169	15.6557	1.27532	4.10101e-11	2.79042e-10
IRF4	13.3431	32.0943	1.27472	4.15112e-11	2.82079e-10
SRPRB	51.9842	23.6143	-1.13241	4.17136e-11	2.83331e-10
FAM206A	20.978	9.52147	-1.14358	4.47842e-11	3.03788e-10
LINC00998	76.7248	34.8001	-1.13411	4.60449e-11	3.1193e-10
RAB8B	84.463	38.8138	-1.12299	5.35683e-11	3.61161e-10
ADAP1	4.66151	11.2259	1.29639	5.38312e-11	3.62618e-10
RPIA	47.5415	21.4949	-1.12902	5.45144e-11	3.66901e-10
LOC100129434	14.8753	35.8992	1.26202	5.506e-11	3.70251e-10
BCL11B	2.84055	6.76047	1.27682	5.64728e-11	3.79094e-10
NCOA1	10.2774	24.4632	1.26314	5.69242e-11	3.81793e-10
RPSA	2146.06	980.144	-1.11903	5.92852e-11	3.97113e-10
MAML2	10.6495	4.90862	-1.12747	6.10698e-11	4.08538e-10
TST	13.9553	6.18882	-1.16392	6.24772e-11	4.17301e-10
COL6A2	18.0458	43.3113	1.25765	6.55421e-11	4.36197e-10
ZC3H7B	7.41517	17.6458	1.25876	6.69431e-11	4.45139e-10
LOC101926898	6.9277	16.9609	1.26422	6.8954e-11	4.57529e-10
GSTP1	488.866	223.903	-1.11599	7.03154e-11	4.65765e-10
TMEM261	26.9091	12.2177	-1.12424	7.25874e-11	4.80404e-10
TMEM216	27.6122	12.4873	-1.13319	7.41232e-11	4.89522e-10
PCSK7	11.4068	27.0937	1.2555	7.48217e-11	4.92876e-10
ITPR1	5.19479	12.3999	1.25715	7.60471e-11	5.00523e-10
SMAP1	36.2782	16.7501	-1.11795	7.82571e-11	5.14631e-10
ARSA	3.72704	8.98929	1.26081	7.96664e-11	5.23454e-10
ANKRD11	5.75847	13.7568	1.25159	7.98033e-11	5.2391e-10
VPS13D	2.06486	4.91143	1.25532	8.06358e-11	5.28703e-10
BTG1	104.361	48.0874	-1.11177	8.31977e-11	5.4435e-10
CLUH	4.79254	11.4948	1.25151	8.56266e-11	5.59769e-10
PPIH	91.7783	41.9462	-1.11898	8.57736e-11	5.60494e-10
PLXND1	6.11692	14.5602	1.25007	8.99223e-11	5.87108e-10
LRP8	3.91599	9.17377	1.25264	9.21979e-11	6.00954e-10
NRROS	9.42096	22.2547	1.25244	9.49437e-11	6.17553e-10
SESN2	2.63753	6.31819	1.2736	1.00645e-10	6.52171e-10
SLC39A4	12.0246	5.26833	-1.18857	1.02826e-10	6.65751e-10
SEC11A	182.522	84.7667	-1.10661	1.07689e-10	6.95494e-10
NEDD9	19.095	8.83756	-1.11146	1.09297e-10	7.05582e-10
MSI2	6.55219	15.6475	1.26169	1.11895e-10	7.21456e-10
FOXK1	2.29451	5.44004	1.24449	1.14771e-10	7.38768e-10
NFKBIZ	4.70109	11.0968	1.24999	1.19429e-10	7.65885e-10
ZNF35	5.16451	2.34764	-1.1559	1.20364e-10	7.71565e-10
TAF9	82.3509	38.0729	-1.10696	1.24421e-10	7.95923e-10
SCD5	3.87616	9.10757	1.26299	1.30996e-10	8.36604e-10
RNF213	24.2121	56.6984	1.23147	1.38522e-10	8.83938e-10
DLEU2L	7.58997	3.3868	-1.15161	1.39893e-10	8.91681e-10
NIT2	68.1	31.4384	-1.10426	1.45403e-10	9.25945e-10
ITGAL	36.6529	86.0482	1.2298	1.47913e-10	9.41543e-10
ZNF74	2.47993	5.92458	1.24377	1.50064e-10	9.5406e-10
MIB2	1.86682	4.58998	1.25665	1.5336e-10	9.74211e-10
FANCA	4.89413	11.5471	1.23605	1.56106e-10	9.90848e-10
ZC3H18	5.23682	12.3693	1.23512	1.6098e-10	1.02011e-09
PLEKHM2	7.37899	17.3963	1.2339	1.61132e-10	1.02066e-09
RAPGEF2	4.16585	9.85107	1.23727	1.62623e-10	1.02968e-09
RERE	3.89318	9.08531	1.23797	1.64811e-10	1.04268e-09
GK5	2.40751	5.62232	1.23451	1.70286e-10	1.07425e-09
N6AMT2	12.7254	5.62908	-1.15223	1.70524e-10	1.07531e-09
LIN52	3.66099	8.82784	1.28304	1.7209e-10	1.08475e-09
FGD2	6.54924	15.4998	1.2382	1.7321e-10	1.09136e-09
TGFBR1	32.474	15.1739	-1.09426	1.7977e-10	1.13178e-09
ZNF791	3.55997	8.48615	1.24683	1.89711e-10	1.19194e-09
UGDH-AS1	20.649	48.4358	1.22189	1.94088e-10	1.21796e-09
ITFG3	3.5049	8.31768	1.23584	2.00994e-10	1.25926e-09
XRCC3	4.17744	9.85403	1.23435	2.06808e-10	1.29412e-09
ZNF268	5.47718	2.54002	-1.10929	2.14261e-10	1.33751e-09
OXNAD1	18.2082	8.49452	-1.09566	2.14649e-10	1.3394e-09
TECPR1	2.72011	6.43941	1.22615	2.14773e-10	1.33963e-09
WSB1	33.7449	78.805	1.21885	2.16752e-10	1.35089e-09
DMPK	3.44897	8.2185	1.22371	2.18458e-10	1.36042e-09
PPP1R2	55.4669	26.0866	-1.08796	2.31955e-10	1.44042e-09
PACS2	2.67332	6.25061	1.22437	2.37177e-10	1.47226e-09
CAMK1D	3.22579	7.59831	1.22301	2.43253e-10	1.50696e-09
SLC35D1	3.54366	8.25009	1.22042	2.66894e-10	1.6475e-09
EFCAB11	6.43258	2.92927	-1.12558	2.69739e-10	1.66439e-09
SAP18	97.1078	45.7107	-1.08348	2.70251e-10	1.66689e-09
ZBTB25	4.58663	10.8113	1.23712	2.72632e-10	1.68024e-09
IAH1	78.1472	36.5669	-1.08854	2.81665e-10	1.73315e-09
REL	2.3077	5.40162	1.2113	3.34605e-10	2.04591e-09
CCNH	48.1223	22.6268	-1.08494	3.34914e-10	2.04699e-09
TNFRSF21	8.44355	3.93387	-1.09506	3.64316e-10	2.21621e-09
DCAF16	5.90974	13.6088	1.20924	3.65965e-10	2.22449e-09
SUGP2	16.8142	38.7623	1.20044	3.80446e-10	2.30619e-09
ITGB1BP1	65.6728	30.8626	-1.07519	4.08812e-10	2.46944e-09
COX14	89.3882	42.2143	-1.07632	4.64378e-10	2.78879e-09
TRANK1	4.98144	11.459	1.19553	4.70476e-10	2.82148e-09
CUL9	3.18757	7.37444	1.19685	4.70825e-10	2.82203e-09
METTL23	62.2442	29.2591	-1.07674	4.76562e-10	2.85422e-09
SMOC2	4.88179	2.2595	-1.1085	4.94421e-10	2.95613e-09
TMEM203	42.5708	20.0681	-1.07498	4.94531e-10	2.95613e-09
JADE1	34.1057	16.0754	-1.06714	5.18654e-10	3.09197e-09
ZNF609	4.77733	10.9398	1.19068	5.47047e-10	3.25124e-09
NBPF11	4.45898	10.1489	1.19713	5.5376e-10	3.28861e-09
FKBP11	93.6265	44.5454	-1.07004	5.58078e-10	3.31045e-09
DYRK4	31.0727	14.5612	-1.08318	5.59962e-10	3.31909e-09
NACC1	6.55433	14.8907	1.19326	5.83221e-10	3.45035e-09
NKTR	21.1192	48.0982	1.1833	6.30018e-10	3.71659e-09
FASN	5.1905	11.8984	1.18403	6.45492e-10	3.80279e-09
AXIN1	5.14095	11.6831	1.19519	6.64063e-10	3.90625e-09
GPR34	11.1912	5.19847	-1.08698	7.0695e-10	4.14594e-09
EPAS1	31.0285	15.0192	-1.0596	7.11572e-10	4.17147e-09
VIMP	88.1173	42.512	-1.06048	7.35345e-10	4.29945e-09
ATOX1	179.937	86.3374	-1.06168	7.40562e-10	4.32832e-09
DUSP11	48.5032	23.0549	-1.0624	7.44176e-10	4.34453e-09
DERL2	24.7	11.7885	-1.06019	7.49757e-10	4.37402e-09
BRWD3	2.54928	5.79356	1.18232	7.58888e-10	4.42376e-09
GNA12	6.45828	14.6728	1.18572	7.92397e-10	4.61562e-09
ABCC10	2.67584	6.11618	1.18873	7.9422e-10	4.6245e-09
GTF2IP1	23.4148	11.1504	-1.05978	8.09659e-10	4.70555e-09
MRFAP1L1	115.924	55.5469	-1.05441	8.38132e-10	4.86374e-09
LOC93622	21.2371	10.0207	-1.0689	8.4632e-10	4.90575e-09
MINK1	7.56595	17.2707	1.17522	8.58777e-10	4.97609e-09
KLHL21	2.9271	6.69786	1.1889	8.72743e-10	5.04946e-09
BBIP1	12.7045	5.99327	-1.07161	9.06835e-10	5.24475e-09
NBPF12	3.71787	8.42376	1.17675	9.2502e-10	5.34594e-09
DHX32	8.76875	4.18062	-1.07343	9.36044e-10	5.40562e-09
CKS2	239.648	114.348	-1.05143	9.67691e-10	5.58006e-09
SEPW1	101.819	48.7595	-1.05316	1.01101e-09	5.82117e-09
NIN	13.5946	30.2317	1.16978	1.03366e-09	5.9428e-09
PSMD10	66.4931	31.9787	-1.05105	1.05438e-09	6.05293e-09
CNPY2	90.3908	43.485	-1.046	1.25346e-09	7.15602e-09
COTL1	520.938	255.492	-1.03926	1.33096e-09	7.57984e-09
PCED1B	5.77008	12.8451	1.18668	1.39478e-09	7.91041e-09
MFF	72.0346	34.8248	-1.04104	1.46327e-09	8.28501e-09
ITGB3BP	48.7639	23.4499	-1.04712	1.5458e-09	8.7254e-09
CARM1	6.06334	13.6952	1.16324	1.57356e-09	8.86916e-09
ZZEF1	4.09115	9.18136	1.15416	1.64663e-09	9.26416e-09
KLHL24	4.6735	10.3867	1.16044	1.69332e-09	9.51994e-09
PHRF1	4.21929	9.47529	1.15632	1.71583e-09	9.63252e-09
TINAGL1	2.11584	4.93409	1.21292	1.74564e-09	9.78217e-09
UBE3C	10.5219	23.321	1.15282	1.7884e-09	1.00109e-08
ZNF107	8.28722	18.4241	1.1523	1.80101e-09	1.00779e-08
IFT20	34.232	16.4504	-1.05072	1.80387e-09	1.00902e-08
C2orf76	7.54763	3.4221	-1.11426	1.95823e-09	1.09379e-08
CUTC	39.5385	19.0426	-1.03942	1.98449e-09	1.10726e-08
NSMCE1	79.606	38.6762	-1.03427	2.06103e-09	1.14584e-08
SUCLG1	109.143	53.1703	-1.02959	2.14996e-09	1.19143e-08
VASP	110.88	54.2768	-1.02567	2.35851e-09	1.30003e-08
SCOC	37.1986	18.1234	-1.03129	2.42921e-09	1.33662e-08
SLC4A2	7.79374	17.2267	1.14356	2.44828e-09	1.34664e-08
TMEM163	7.75065	3.71128	-1.06564	2.73652e-09	1.49827e-08
CEP104	2.5722	5.71155	1.14561	2.74662e-09	1.50327e-08
CCDC115	49.2458	24.208	-1.02504	2.77772e-09	1.51922e-08
SIDT1	3.35328	7.43132	1.1453	2.78802e-09	1.52378e-08
C11orf98	147.533	72.0824	-1.02077	3.24348e-09	1.76462e-08
KMT2A	5.50429	12.0252	1.13079	3.29084e-09	1.78823e-08
PITPNM1	6.06018	13.4701	1.13154	3.35802e-09	1.82182e-08
CAPN15	4.09895	9.05247	1.13384	3.43529e-09	1.86309e-08
FAM120AOS	29.3368	14.4561	-1.01926	3.61237e-09	1.95434e-08
INPPL1	13.7268	30.1321	1.12676	3.62848e-09	1.961e-08
TSC22D4	16.417	35.8902	1.12691	3.94641e-09	2.12615e-08
ERP44	43.852	21.7247	-1.01157	4.01335e-09	2.15922e-08
MRPS31P5	1.78206	4.03873	1.16576	4.12814e-09	2.21943e-08
GLO1	100.542	49.6993	-1.00836	4.48963e-09	2.40212e-08
PPIL3	44.2424	21.7672	-1.01722	4.50407e-09	2.40901e-08
NEU3	2.25169	5.10457	1.14596	4.6306e-09	2.47412e-08
HIVEP1	2.35175	5.18904	1.12282	4.78469e-09	2.55293e-08
ZNF783	2.01595	4.47211	1.13286	4.80952e-09	2.5653e-08
AKT3	4.41593	9.50891	1.12962	5.05816e-09	2.69236e-08
UFC1	178.343	88.2765	-1.00418	5.24685e-09	2.78705e-08
SYF2	77.123	38.2512	-1.00551	5.26552e-09	2.79601e-08
ZSCAN16	11.7013	5.66096	-1.04245	5.40319e-09	2.86421e-08
RNF166	9.15349	19.7169	1.13181	5.45347e-09	2.8879e-08
KDM4B	3.22247	7.03257	1.11924	5.469e-09	2.89513e-08
URGCP	3.2539	7.09632	1.12731	5.55038e-09	2.93621e-08
SLC38A5	9.00683	19.3847	1.12525	5.59918e-09	2.95698e-08
ACAD10	2.73597	6.00784	1.12423	5.63277e-09	2.97168e-08
SLC1A4	50.1087	25.2383	-1.00201	5.63796e-09	2.97341e-08
FBXO4	21.5592	10.578	-1.0148	6.08999e-09	3.202e-08
ZNF282	4.18585	9.16586	1.11759	6.25667e-09	3.28518e-08
NUDT5	101.407	50.1629	-0.999814	6.56029e-09	3.43645e-08
MRPL48	55.5027	27.4265	-1.00468	6.81049e-09	3.55909e-08
ACAA2	110.668	55.0719	-0.995904	6.98799e-09	3.6457e-08
ATM	10.1144	21.7143	1.10402	7.05131e-09	3.67626e-08
SMG5	12.023	25.808	1.10546	7.073e-09	3.68633e-08
ZCCHC17	42.9473	21.3692	-1.00025	7.36275e-09	3.8309e-08
CISD1	14.858	7.30822	-1.01062	7.41254e-09	3.85551e-08
SMN2	41.5444	20.5993	-1.00001	7.46764e-09	3.88157e-08
LSS	4.51759	9.77106	1.10981	7.70555e-09	3.99987e-08
CCDC59	35.5032	17.6042	-1.00068	7.77385e-09	4.03262e-08
FAM103A1	39.196	19.4972	-0.999927	7.78443e-09	4.03541e-08
IMP3	85.861	42.7933	-0.995606	7.81334e-09	4.04904e-08
AP5Z1	2.8149	6.0907	1.11322	8.27225e-09	4.27685e-08
ACO2	17.9161	38.3998	1.10124	8.4285e-09	4.35472e-08
PTPN23	4.17901	9.06017	1.10137	8.43684e-09	4.35758e-08
VPS26A	66.8059	33.5801	-0.990762	8.57019e-09	4.42498e-08
MAGOHB	15.8779	7.85607	-0.997135	9.2745e-09	4.7759e-08
MYL5	7.46475	3.52762	-1.10598	9.65558e-09	4.96531e-08
SAMD4B	4.627	10.0058	1.09732	9.65832e-09	4.96531e-08
DTNB	3.07226	6.65505	1.14763	1.01175e-08	5.19101e-08
SDHAP3	2.69218	6.11931	1.16619	1.0386e-08	5.32352e-08
C18orf21	31.4549	15.6159	-0.999273	1.05106e-08	5.38562e-08
UBE2F	43.6189	22.1683	-0.987114	1.09485e-08	5.59702e-08
PSMA1	242.784	122.456	-0.982366	1.09684e-08	5.60533e-08
PARP14	24.2041	51.2234	1.08833	1.10559e-08	5.64819e-08
H1FX	29.4963	62.7307	1.09137	1.12638e-08	5.74306e-08
NBPF8	10.0483	21.3778	1.08903	1.14458e-08	5.83012e-08
RCBTB1	7.05954	15.0497	1.0954	1.14898e-08	5.85058e-08
FAM219A	2.52748	5.48798	1.10619	1.15206e-08	5.86432e-08
CHMP2A	129.055	65.2059	-0.98254	1.21129e-08	6.14767e-08
HACL1	23.8602	12.0003	-0.987209	1.26602e-08	6.40448e-08
SIN3B	3.73483	8.0199	1.08772	1.27624e-08	6.44774e-08
GALNS	3.05953	6.66928	1.11839	1.30836e-08	6.59929e-08
PFKP	22.9173	48.4409	1.08457	1.34524e-08	6.77554e-08
TBL1X	3.25074	6.7959	1.09906	1.35969e-08	6.84038e-08
SLC19A1	2.3983	5.19275	1.11714	1.37429e-08	6.9064e-08
PRKCB	15.0668	31.6295	1.08179	1.43417e-08	7.19173e-08
PMS2CL	2.14054	4.80264	1.14775	1.43557e-08	7.19473e-08
METTL2B	4.84909	10.3639	1.1051	1.44934e-08	7.25604e-08
UBE4B	4.39108	9.31367	1.08569	1.458e-08	7.29471e-08
LINC00467	14.0175	6.83109	-1.0236	1.50463e-08	7.51348e-08
CCDC88C	7.5207	15.8791	1.07897	1.51148e-08	7.54147e-08
POMT1	3.93223	8.38122	1.09136	1.5446e-08	7.69569e-08
AKT1	26.2657	55.1887	1.0772	1.62516e-08	8.07628e-08
H2AFZ	763.221	386.488	-0.969619	1.64348e-08	8.16473e-08
IRF8	68.0146	35.1972	-0.972258	1.64618e-08	8.1729e-08
IDNK	16.1006	8.00552	-1.00111	1.64897e-08	8.18414e-08
DFFA	5.73993	12.1476	1.0887	1.667e-08	8.27097e-08
DGKA	12.298	25.9052	1.07721	1.67e-08	8.28318e-08
BDH2	17.6484	8.86595	-0.979252	1.67989e-08	8.32428e-08
RPL36A-HNRNPH2	62.6472	31.8026	-0.970846	1.73417e-08	8.57678e-08
SLC12A9	6.58197	13.9082	1.08193	1.78249e-08	8.80735e-08
SMAGP	7.47754	3.60505	-1.0407	1.78375e-08	8.81073e-08
PHC3	5.64419	11.8352	1.07381	1.7921e-08	8.84354e-08
CNRIP1	5.44073	2.64625	-1.03083	1.85433e-08	9.13318e-08
GLIPR1	53.372	27.3079	-0.967908	1.86629e-08	9.18626e-08
TEFM	19.9884	10.0432	-0.985952	1.90573e-08	9.37741e-08
ZSCAN16-AS1	6.76302	3.32996	-1.00373	2.04511e-08	1.0025e-07
CLSTN1	10.8964	22.7931	1.06841	2.10316e-08	1.02934e-07
DMXL2	6.14958	12.8964	1.06851	2.17835e-08	1.06445e-07
TOB1	4.77371	10.0544	1.09776	2.18922e-08	1.06909e-07
LRIG1	5.66492	11.7478	1.07219	2.20414e-08	1.0757e-07
TRAPPC3	70.8422	36.0725	-0.96636	2.21599e-08	1.0808e-07
HSD17B12	40.6761	20.8843	-0.965683	2.22658e-08	1.08562e-07
MRPS11	30.3436	15.3797	-0.972442	2.2535e-08	1.09841e-07
MEA1	146.597	74.7252	-0.963483	2.31313e-08	1.12605e-07
DAPK1	5.79052	12.1342	1.06822	2.40898e-08	1.16977e-07
NRN1	16.3029	8.43838	-0.981607	2.56645e-08	1.2439e-07
SDF2L1	45.0216	22.8419	-0.970039	2.62177e-08	1.26992e-07
SLC35E2B	8.601	17.9773	1.05903	2.74035e-08	1.32446e-07
LINC00094	4.44001	2.24864	-0.977803	2.75431e-08	1.33038e-07
ARL2BP	64.5845	33.1569	-0.957739	2.80477e-08	1.35349e-07
DOCK9	3.53495	7.2685	1.06514	2.95746e-08	1.42318e-07
UAP1L1	2.47609	5.27514	1.07253	2.9801e-08	1.43363e-07
MORF4L2	111.828	57.4467	-0.953972	3.00105e-08	1.44281e-07
CLCN7	7.53932	15.8531	1.05621	3.01769e-08	1.45036e-07
HMGN3	134.739	69.3592	-0.954725	3.1424e-08	1.50749e-07
FAM129A	13.4257	27.4979	1.05391	3.15986e-08	1.51541e-07
REXO1	3.60159	7.57533	1.05692	3.18458e-08	1.52678e-07
FAM92A1	14.7004	7.47217	-0.969259	3.21174e-08	1.53886e-07
INO80B	3.39133	7.41221	1.09189	3.25306e-08	1.55769e-07
SYMPK	11.2976	23.5587	1.05171	3.25917e-08	1.56014e-07
SNRK	32.8879	17.058	-0.951999	3.30563e-08	1.57993e-07
DNMT3A	3.77404	7.82381	1.0734	3.31322e-08	1.58307e-07
UBC	1181.14	612.682	-0.948001	3.38966e-08	1.61686e-07
PVRL3	10.7632	5.49086	-0.962394	3.42436e-08	1.63215e-07
DVL3	9.42347	19.507	1.05002	3.47138e-08	1.65405e-07
COMMD9	24.1229	12.426	-0.95406	3.59469e-08	1.70861e-07
KIAA0319L	7.60106	15.807	1.0493	3.59749e-08	1.70941e-07
SH3BP2	6.72125	13.8474	1.04862	3.7269e-08	1.7682e-07
CD96	86.0462	44.6128	-0.94618	3.78231e-08	1.79339e-07
ZMYM6NB	71.7052	36.8936	-0.952317	3.88594e-08	1.83971e-07
PSMG4	16.8228	8.36413	-0.983305	3.90526e-08	1.84829e-07
SURF1	55.8136	28.6929	-0.952182	4.07243e-08	1.92506e-07
PCNXL3	5.04597	10.4652	1.04292	4.32415e-08	2.03783e-07
NUDT6	9.25066	4.59257	-0.993891	4.36178e-08	2.05494e-07
MAPKAPK3	58.7597	30.5549	-0.944007	4.41189e-08	2.07778e-07
SLC35D2	12.2063	6.35078	-0.969948	4.43752e-08	2.08872e-07
MAFG	3.31496	6.87242	1.04839	4.59621e-08	2.15948e-07
TXNDC15	32.0561	16.6097	-0.942929	4.70581e-08	2.2083e-07
KHSRP	19.9867	41.0714	1.03764	4.79135e-08	2.24708e-07
WRAP73	6.4171	13.2892	1.05941	4.84174e-08	2.27002e-07
CDKN2C	30.9738	15.9613	-0.94621	4.87512e-08	2.28429e-07
GPATCH2L	2.97876	6.11038	1.04136	4.91025e-08	2.29936e-07
ISY1-RAB43	6.07628	12.5014	1.03933	5.25911e-08	2.45645e-07
SMIM8	5.5425	2.79538	-0.977253	5.25997e-08	2.45645e-07
ZFYVE26	3.44144	7.0699	1.03755	5.37211e-08	2.50731e-07
C14orf80	3.35777	7.06188	1.08138	5.5248e-08	2.57624e-07
MRPL17	37.7921	19.5319	-0.939178	5.59402e-08	2.60617e-07
ST3GAL4	3.33609	6.98197	1.0809	5.59829e-08	2.60738e-07
TMEM38B	10.8828	5.63623	-0.947389	5.63174e-08	2.62217e-07
C4orf27	36.0978	18.6874	-0.945535	5.6395e-08	2.62499e-07
PKP4	8.22732	16.8379	1.03315	5.78454e-08	2.68686e-07
TMEM167A	52.0324	27.2745	-0.934019	5.84917e-08	2.71606e-07
XRN1	7.96525	16.2496	1.03276	5.86312e-08	2.72172e-07
ORC1	3.69591	7.64352	1.04628	5.87145e-08	2.72477e-07
PTPRJ	13.1227	26.7033	1.03056	5.98288e-08	2.77132e-07
ATXN2	2.92467	6.03522	1.03791	5.98427e-08	2.77132e-07
DRAM2	59.4565	31.0745	-0.93568	6.0279e-08	2.78903e-07
SDF2	46.3404	24.0361	-0.938512	6.24198e-08	2.88378e-07
EPN1	9.24326	18.9149	1.03395	6.38415e-08	2.94682e-07
SPTAN1	19.8816	40.4727	1.026	6.40144e-08	2.95392e-07
ZNF746	5.44642	11.1619	1.03513	6.44696e-08	2.97404e-07
SOCS7	2.0469	4.19941	1.03213	6.73125e-08	3.0969e-07
ENDOG	9.41415	4.74089	-0.977085	7.08167e-08	3.24944e-07
MYC	12.035	24.3304	1.02891	7.68376e-08	3.51426e-07
LIPG	4.50652	2.33509	-0.954162	7.69348e-08	3.51767e-07
SAMD3	65.6232	34.234	-0.927256	7.71537e-08	3.52664e-07
MTX3	4.14205	8.48358	1.02321	7.74126e-08	3.53743e-07
BTBD2	8.6194	17.6723	1.02362	7.91689e-08	3.61449e-07
FAM204A	22.6816	11.8394	-0.931232	7.94516e-08	3.62633e-07
ZNF569	5.3241	2.75575	-0.947855	7.96467e-08	3.63309e-07
TMEM205	56.6677	29.6512	-0.932676	8.15907e-08	3.7163e-07
ADAM22	2.36411	4.79961	1.02683	8.2804e-08	3.76824e-07
MCM8	5.84344	11.8521	1.02536	8.3154e-08	3.78306e-07
GTPBP1	7.92156	16.0136	1.02062	8.3923e-08	3.8158e-07
DEAF1	3.30003	6.75079	1.0395	8.51934e-08	3.86971e-07
ING5	2.51925	5.15645	1.0297	8.52834e-08	3.87198e-07
ZMAT5	24.5712	12.744	-0.942562	8.7614e-08	3.96965e-07
ENSA	279.408	146.556	-0.919834	9.07676e-08	4.10773e-07
MDFIC	46.0614	24.3147	-0.919209	9.52692e-08	4.30517e-07
SIPA1L1	4.34239	8.81097	1.01594	9.57555e-08	4.32588e-07
SSNA1	55.4647	29.1616	-0.927156	9.641e-08	4.35418e-07
RBMX2	39.0709	20.3602	-0.925032	9.81967e-08	4.42714e-07
CENPW	26.5508	13.7358	-0.932829	9.90601e-08	4.46347e-07
FAM228B	5.20961	2.54687	-0.995499	9.91382e-08	4.46569e-07
ASF1A	25.7415	13.5091	-0.923756	9.9277e-08	4.47064e-07
CCDC14	12.3097	24.718	1.01284	1.00029e-07	4.49925e-07
ATP11A	3.04987	6.18589	1.01613	1.00321e-07	4.51111e-07
ZBTB48	4.17416	8.55706	1.02688	1.04089e-07	4.66835e-07
WDR41	32.2144	17.0692	-0.920112	1.06539e-07	4.77271e-07
ATP5G1	102.382	53.5832	-0.92144	1.0908e-07	4.8809e-07
DPH6	8.49769	4.36277	-0.941596	1.10388e-07	4.93514e-07
CTTN	6.75945	13.6574	1.01819	1.16507e-07	5.18329e-07
ATG4A	19.3811	10.1798	-0.922685	1.17415e-07	5.2207e-07
RTN4	132.907	70.6874	-0.910815	1.24453e-07	5.51307e-07
PCIF1	7.77916	15.8361	1.0075	1.27613e-07	5.64982e-07
CARD8-AS1	14.9094	7.80895	-0.925932	1.28725e-07	5.69579e-07
APIP	46.9995	24.8208	-0.914934	1.35649e-07	5.99362e-07
ASTN2	2.47298	5.069	1.01037	1.37959e-07	6.09045e-07
ZNF280C	2.27231	4.5649	1.01518	1.40466e-07	6.19761e-07
TCF20	5.61258	11.169	1.00072	1.44001e-07	6.34456e-07
PPTC7	7.0938	14.3251	1.00362	1.44533e-07	6.36437e-07
HTT	4.27054	8.56845	0.997186	1.46189e-07	6.43366e-07
TM7SF2	2.45865	5.12724	1.06	1.50216e-07	6.60337e-07
JUNB	30.8193	61.3948	1.00118	1.51388e-07	6.65114e-07
HEXDC	4.68178	9.48212	1.01149	1.52399e-07	6.68987e-07
CLTB	53.517	28.3645	-0.910014	1.55084e-07	6.79999e-07
ITGA4	27.6627	54.8395	0.995458	1.56123e-07	6.84147e-07
RARA	3.09737	6.25783	1.0082	1.57175e-07	6.88388e-07
ARID1A	9.39058	18.6618	0.99327	1.61553e-07	7.06368e-07
PSMG3	42.133	22.2988	-0.914851	1.65599e-07	7.22833e-07
RAP2A	33.2038	17.7621	-0.903782	1.65732e-07	7.2321e-07
GUCY1B3	7.84746	4.17609	-0.921496	1.66524e-07	7.26464e-07
LINC01578	47.5208	25.2399	-0.905933	1.69344e-07	7.38351e-07
IFT22	6.92273	3.61062	-0.930336	1.69695e-07	7.39672e-07
NQO2	24.4454	12.868	-0.916403	1.70782e-07	7.44202e-07
TMEM201	2.15119	4.32923	1.01326	1.71148e-07	7.45375e-07
CCDC134	2.0168	4.28193	1.07947	1.71674e-07	7.47234e-07
HDHD1	19.4404	10.2779	-0.910807	1.77983e-07	7.72973e-07
SKA2	44.4545	23.5916	-0.901417	1.791e-07	7.77171e-07
OSTM1	26.3437	14.1132	-0.901943	1.80085e-07	7.80788e-07
SRSF3	221.41	118.09	-0.897056	1.86241e-07	8.05899e-07
PPP1CB	107.67	57.5734	-0.89725	1.86846e-07	8.08066e-07
USP11	11.1204	22.1585	0.989402	1.90347e-07	8.2252e-07
CARD11	9.30077	18.5872	0.988116	1.90446e-07	8.2272e-07
HMGXB3	7.28765	14.4904	0.989437	1.95535e-07	8.43761e-07
EOGT	5.39672	10.6991	0.993317	1.9606e-07	8.45555e-07
VKORC1	62.1002	33.1154	-0.903221	1.96292e-07	8.46322e-07
MYCBP2	8.60998	16.9555	0.984694	2.07242e-07	8.90066e-07
WDTC1	5.00005	9.96296	0.986646	2.15292e-07	9.22339e-07
RHEBL1	12.308	6.49124	-0.9269	2.15818e-07	9.24085e-07
EMC4	102.85	54.9949	-0.896299	2.18085e-07	9.33018e-07
MAP4K4	14.4907	28.2264	0.982293	2.23409e-07	9.55002e-07
KIAA0586	3.73684	7.40548	0.994379	2.23628e-07	9.55677e-07
RABGGTA	6.67703	13.3399	0.995538	2.29929e-07	9.80979e-07
SNX29	2.74688	5.48551	0.986629	2.38053e-07	1.01452e-06
BRD1	5.32962	10.5602	0.98308	2.40777e-07	1.02529e-06
MIA3	9.15701	17.9473	0.97957	2.46919e-07	1.05e-06
ZSWIM7	14.2078	7.48789	-0.903891	2.65262e-07	1.12492e-06
COMMD3-BMI1	28.4718	15.3321	-0.888952	2.80389e-07	1.18711e-06
ITPKB	5.47309	10.7987	0.974907	2.82075e-07	1.1936e-06
MYCBP	34.507	18.5142	-0.888687	2.84682e-07	1.20365e-06
MRPL18	73.5843	39.5288	-0.889785	2.88642e-07	1.21906e-06
DUSP23	26.1318	13.9249	-0.909498	3.04292e-07	1.28236e-06
UBAP2	5.76296	11.2362	0.974919	3.16475e-07	1.33117e-06
LRSAM1	4.1641	8.25693	0.974987	3.17034e-07	1.3328e-06
FNIP2	2.15219	4.28214	0.987428	3.33864e-07	1.40165e-06
RRN3P1	4.50212	8.84844	1.0068	3.40992e-07	1.42887e-06
UBE2N	111.32	60.1654	-0.878831	3.43709e-07	1.43909e-06
SRPR	29.2085	56.8424	0.965466	3.44903e-07	1.44291e-06
ATG2B	3.18068	6.20356	0.970293	3.45394e-07	1.44458e-06
LOC101930071	6.52403	2.91599	-1.12298	3.47009e-07	1.45016e-06
SET	324.88	176.284	-0.876439	3.5693e-07	1.48921e-06
URB1-AS1	5.01997	2.48478	-0.992871	3.59738e-07	1.49971e-06
DHRS4L2	21.8688	11.7195	-0.892739	3.61243e-07	1.50558e-06
ROCK2	4.07511	7.99908	0.96723	3.64902e-07	1.5192e-06
C4orf29	2.37323	4.81149	1.0053	3.69202e-07	1.53628e-06
KDM7A	4.51691	8.81344	0.967707	3.77947e-07	1.5714e-06
CCDC88B	15.3885	29.871	0.960799	3.84891e-07	1.59813e-06
SMIM11	22.4345	11.8707	-0.898738	3.85252e-07	1.5992e-06
FOCAD	2.74922	5.3346	0.976076	3.89213e-07	1.61477e-06
UBE2D3	166.153	90.4065	-0.873472	3.9404e-07	1.63437e-06
STRADB	14.0972	7.53892	-0.888683	3.98371e-07	1.65189e-06
GINS2	41.7639	22.5243	-0.882094	4.03016e-07	1.6707e-06
HGSNAT	5.21893	10.0849	0.964532	4.0723e-07	1.68637e-06
NXT1	32.0306	17.1933	-0.885218	4.09717e-07	1.69576e-06
SGSM3	7.05358	13.8251	0.96646	4.10197e-07	1.69729e-06
MRPS21	74.7199	40.138	-0.875624	4.21351e-07	1.74205e-06
HIRA	7.1893	13.9729	0.962357	4.22126e-07	1.74479e-06
TSPAN14	8.31567	16.1078	0.960485	4.24541e-07	1.7543e-06
APOBEC3C	34.6411	66.7734	0.961239	4.43375e-07	1.82726e-06
NMRK1	40.7782	22.1224	-0.87842	4.49935e-07	1.85281e-06
SMIM10L1	10.9029	5.88378	-0.877899	4.5432e-07	1.87037e-06
CEP135	3.14172	6.13838	0.962075	4.56608e-07	1.8783e-06
FBXL19	2.71464	5.36534	0.964032	4.57941e-07	1.88178e-06
DGUOK	72.333	39.0401	-0.874433	4.63037e-07	1.90222e-06
PLK3	2.45681	4.89022	1.00206	4.7516e-07	1.94944e-06
EIF3K	322.314	175.619	-0.868372	4.76129e-07	1.9529e-06
CORO7	10.9682	21.3643	0.954422	4.78165e-07	1.96021e-06
C7orf26	6.42621	12.4825	0.966978	4.90949e-07	2.00996e-06
HABP4	10.2609	5.53469	-0.884166	5.04723e-07	2.06472e-06
STIL	4.78709	9.25789	0.956148	5.16755e-07	2.11338e-06
ATP13A1	9.74724	18.909	0.94934	5.29254e-07	2.16051e-06
ACYP2	9.09705	4.77931	-0.907113	5.3273e-07	2.17412e-06
GIMAP7	200.903	110.242	-0.864738	5.3774e-07	2.19341e-06
UTP20	3.13816	6.09896	0.950313	5.42593e-07	2.21146e-06
ANXA2R	18.0764	9.81886	-0.883682	5.46462e-07	2.22548e-06
DTX2	4.51763	8.79775	0.967373	5.48304e-07	2.23239e-06
SAR1B	19.4785	10.6621	-0.865879	5.51127e-07	2.24329e-06
COQ3	11.0681	5.91995	-0.897118	5.53058e-07	2.25056e-06
RNASEH2C	26.7561	14.5338	-0.868298	5.56862e-07	2.26545e-06
ZNF839	2.74062	5.35666	0.962416	5.58772e-07	2.27262e-06
C11orf31	68.4115	37.1586	-0.866643	5.67418e-07	2.30597e-06
LLGL1	4.087	7.98951	0.951308	5.72685e-07	2.32494e-06
CWC27	26.5442	14.4643	-0.869256	5.75354e-07	2.33516e-06
KLHL15	10.0239	5.45804	-0.868091	5.90124e-07	2.3901e-06
TXNIP	386.338	213.724	-0.859196	6.07999e-07	2.458e-06
CACTIN	2.99771	5.86844	0.951851	6.49922e-07	2.61453e-06
C9orf156	15.4715	8.42837	-0.874007	6.83242e-07	2.74288e-06
SMCR8	3.91428	7.60358	0.941025	6.84852e-07	2.74848e-06
MPHOSPH10	39.1505	21.3643	-0.859296	6.97547e-07	2.79524e-06
DUSP12	40.7026	22.1709	-0.862355	7.20966e-07	2.88461e-06
ABI3	36.8727	20.4245	-0.859867	7.22843e-07	2.89137e-06
POLR2J3	6.94632	13.5422	0.945639	7.4261e-07	2.96661e-06
WDYHV1	12.5697	6.7906	-0.8768	7.62043e-07	3.03642e-06
PEX14	4.50166	8.77199	0.955412	7.81467e-07	3.10503e-06
DPCD	7.18981	3.73665	-0.926069	8.3195e-07	3.29212e-06
ECE1	5.97769	11.4243	0.93422	8.40322e-07	3.3227e-06
DENND4C	5.92115	11.2652	0.933255	8.54183e-07	3.37321e-06
STK17B	84.851	47.0952	-0.848491	8.6147e-07	3.40025e-06
RPL7L1	20.7936	39.8414	0.936341	8.68182e-07	3.42507e-06
ERICH1	7.80556	14.9671	0.945015	8.70352e-07	3.43181e-06
COX5A	236.513	130.08	-0.849696	8.71862e-07	3.43689e-06
H2AFJ	6.639	3.67282	-0.867813	8.76446e-07	3.4532e-06
ISCA1	29.3526	16.1485	-0.853723	9.12792e-07	3.58547e-06
ECH1	101.265	56.4751	-0.84897	9.30511e-07	3.6523e-06
DNAJC7	104.848	58.0033	-0.846423	9.53192e-07	3.73565e-06
DHX37	4.02112	7.69952	0.932966	9.56473e-07	3.74756e-06
DOHH	2.66398	5.21313	0.96941	9.64374e-07	3.77756e-06
RRP7BP	3.89493	7.45821	0.949703	9.68219e-07	3.7907e-06
SCD	26.57	49.7919	0.924987	9.87926e-07	3.86298e-06
SAR1A	74.0479	41.064	-0.84439	1.00715e-06	3.93258e-06
TRAF7	11.1713	21.276	0.924339	1.03363e-06	4.02747e-06
TPM1	36.4184	20.1776	-0.849242	1.04062e-06	4.05165e-06
NGDN	51.6591	28.4496	-0.848383	1.06182e-06	4.12795e-06
GALNT2	7.78606	14.635	0.925226	1.11657e-06	4.32778e-06
ARPC2	580.035	324.655	-0.838585	1.14329e-06	4.42363e-06
MLXIP	3.41166	6.49923	0.920404	1.15576e-06	4.4685e-06
APOBEC3D	9.07589	17.0901	0.924681	1.18212e-06	4.567e-06
PPFIBP1	2.34513	4.47662	0.925185	1.1853e-06	4.57815e-06
MVD	5.56666	10.6178	0.938818	1.18991e-06	4.59484e-06
PPP6C	40.2203	22.4234	-0.838783	1.21745e-06	4.69298e-06
SPATA13	22.9023	43.0437	0.916312	1.21852e-06	4.69596e-06
ADO	21.6086	12.0023	-0.841362	1.24306e-06	4.78813e-06
ACOT13	17.6274	9.78135	-0.841303	1.26497e-06	4.86891e-06
PLD2	2.78945	5.37935	0.93038	1.27878e-06	4.91715e-06
SPG7	11.8409	22.4215	0.915653	1.29413e-06	4.97126e-06
LSM4	54.512	30.252	-0.838673	1.29464e-06	4.97198e-06
MOV10	12.4993	23.5372	0.915184	1.31646e-06	5.05201e-06
FSD1L	4.88138	2.69117	-0.853385	1.31695e-06	5.05266e-06
ANAPC11	69.1139	38.4045	-0.840547	1.3287e-06	5.09649e-06
MEF2D	10.5144	19.7466	0.914088	1.33551e-06	5.11878e-06
BMP1	2.61811	4.98521	0.928621	1.35481e-06	5.1902e-06
SNAPIN	51.2738	28.5086	-0.840143	1.40113e-06	5.36236e-06
SWI5	16.6914	9.12278	-0.859373	1.42996e-06	5.46728e-06
LAGE3	29.2188	16.1537	-0.846935	1.45784e-06	5.56841e-06
BANP	2.55266	4.91076	0.948373	1.49114e-06	5.68997e-06
WWC3	5.23094	9.86261	0.911527	1.49491e-06	5.70295e-06
IFNGR1	79.423	44.813	-0.831886	1.49609e-06	5.70604e-06
ARL6IP1	267.774	150.285	-0.829233	1.52095e-06	5.79391e-06
RPP40	11.5403	6.24569	-0.861222	1.521e-06	5.79391e-06
POC1B	21.6667	12.108	-0.835196	1.52159e-06	5.79475e-06
MLH3	2.12987	4.01473	0.918904	1.54832e-06	5.89076e-06
NFRKB	3.52881	6.64593	0.91652	1.56063e-06	5.93175e-06
BMP2K	6.71758	12.5818	0.917703	1.58177e-06	6.00621e-06
NCDN	4.02538	7.62032	0.913227	1.61441e-06	6.12416e-06
N4BP2	4.37488	8.15137	0.908402	1.65528e-06	6.26696e-06
FKBP4	16.7201	31.018	0.903759	1.72483e-06	6.52229e-06
GCC2	8.58148	16.0345	0.904069	1.76152e-06	6.6513e-06
FKRP	2.20185	4.18803	0.929052	1.78772e-06	6.74695e-06
RANGAP1	15.1464	28.0927	0.902613	1.79418e-06	6.76965e-06
ERCC8	10.9416	6.05373	-0.843227	1.79987e-06	6.78784e-06
BPTF	6.96242	12.9812	0.900907	1.81928e-06	6.85436e-06
KIF1B	3.42074	6.37882	0.904609	1.8546e-06	6.97555e-06
PEF1	50.8524	28.6934	-0.825591	1.91385e-06	7.18445e-06
THAP1	13.1475	7.33209	-0.835982	1.94736e-06	7.30497e-06
MFSD10	8.2635	15.5318	0.906265	1.99379e-06	7.47008e-06
TSTD1	54.3323	30.1915	-0.835709	1.99664e-06	7.47895e-06
LRBA	6.89044	12.7878	0.898468	2.00502e-06	7.50853e-06
NBPF9	7.803	14.4463	0.898587	2.06101e-06	7.70703e-06
LAPTM5	552.027	313.732	-0.817599	2.12176e-06	7.92082e-06
USP13	3.1679	5.82814	0.902447	2.21162e-06	8.24637e-06
GPATCH8	9.65995	17.9536	0.892226	2.24974e-06	8.38042e-06
CASP3	87.0235	49.4158	-0.816908	2.271e-06	8.4576e-06
SLC9A8	4.20562	7.86895	0.893568	2.29783e-06	8.55339e-06
FLJ20021	4.71685	2.46855	-0.925961	2.30172e-06	8.56582e-06
PTBP3	56.1378	31.8957	-0.814103	2.39592e-06	8.89716e-06
MAP1S	3.85883	7.30488	0.896103	2.40215e-06	8.91391e-06
C11orf80	8.12766	4.51758	-0.839413	2.40858e-06	8.9356e-06
TSPAN15	5.79942	3.18711	-0.859744	2.46747e-06	9.13003e-06
UBXN7	3.42057	6.41642	0.894207	2.48199e-06	9.18157e-06
DGCR6L	48.2512	27.1622	-0.819145	2.49379e-06	9.22305e-06
C14orf159	12.7981	23.4664	0.893279	2.57214e-06	9.49694e-06
LCLAT1	8.85996	4.98319	-0.821607	2.58706e-06	9.54975e-06
PRDM2	9.14906	16.8645	0.886927	2.71844e-06	1.00061e-05
SPHK2	2.69402	5.09348	0.901095	2.72823e-06	1.00398e-05
ALKBH3	14.9095	8.40852	-0.82718	2.8312e-06	1.04014e-05
USP36	4.62676	8.59825	0.885293	2.83897e-06	1.04275e-05
TCF3	8.4577	15.5714	0.885398	2.8508e-06	1.04666e-05
POLM	4.34055	8.09067	0.891224	2.92424e-06	1.07229e-05
NCK1	24.7525	14.1042	-0.809701	2.976e-06	1.0905e-05
GJA4	6.36008	3.53136	-0.849549	3.00234e-06	1.09989e-05
NDN	5.56258	3.05632	-0.849841	3.00361e-06	1.10009e-05
TMEM184C	5.78088	10.6839	0.893444	3.0124e-06	1.10305e-05
RPP21	28.8552	16.0454	-0.832678	3.09205e-06	1.13062e-05
BUB3	159.72	90.6173	-0.805054	3.14147e-06	1.14814e-05
TRNAU1AP	20.5112	11.5991	-0.814658	3.20336e-06	1.16939e-05
RNF139	28.8804	16.4251	-0.807265	3.23961e-06	1.18123e-05
FNTA	96.4231	54.8352	-0.805242	3.25025e-06	1.18483e-05
ZNF124	3.94993	7.31276	0.898939	3.38293e-06	1.23117e-05
ATP9B	2.55112	4.77151	0.888125	3.39494e-06	1.23467e-05
RBM43	2.9159	5.42632	0.892845	3.40359e-06	1.23724e-05
CASC5	5.37344	9.92457	0.876141	3.42253e-06	1.24353e-05
ARGLU1	41.5271	76.021	0.87504	3.47978e-06	1.26256e-05
COPZ1	126.8	72.5356	-0.801773	3.50046e-06	1.26977e-05
CLIC1	690.382	394.196	-0.800021	3.54922e-06	1.28535e-05
DHFRL1	2.99197	5.53312	0.892758	3.56436e-06	1.29023e-05
PHACTR4	4.56146	8.32929	0.87895	3.62229e-06	1.30845e-05
CIB1	98.6964	56.5848	-0.803153	3.67022e-06	1.32391e-05
ZNF276	7.6786	14.0551	0.873598	3.83837e-06	1.38071e-05
ZNF140	9.87681	5.64578	-0.810917	3.85233e-06	1.38541e-05
PSMD13	133.99	76.6603	-0.798089	3.89662e-06	1.39993e-05
ATG101	32.584	18.4838	-0.805705	3.90399e-06	1.40203e-05
AP5B1	4.13041	7.58724	0.873924	3.92364e-06	1.40811e-05
ENTPD4	9.31779	17.0612	0.870948	3.94028e-06	1.41376e-05
RAMP2	10.6448	5.92141	-0.849956	3.98594e-06	1.42832e-05
COX8A	273.609	157.048	-0.798045	4.03897e-06	1.44649e-05
C15orf57	25.0332	14.2145	-0.805744	4.04514e-06	1.44836e-05
MFSD5	26.6314	15.2068	-0.804546	4.05733e-06	1.45239e-05
RABEP2	3.36669	6.29452	0.885791	4.07018e-06	1.45666e-05
SRP14	281.735	161.841	-0.796007	4.07403e-06	1.4577e-05
SERF2	138.041	79.1762	-0.794584	4.20612e-06	1.50288e-05
GNPDA1	27.9906	16.1923	-0.800967	4.22713e-06	1.50969e-05
TMEM8A	7.73627	14.1496	0.87126	4.24522e-06	1.51545e-05
PCGF6	11.6336	6.56616	-0.810068	4.25089e-06	1.51713e-05
YLPM1	5.94485	10.7864	0.869395	4.2598e-06	1.51995e-05
TRMT1	8.21501	15.0217	0.87107	4.35795e-06	1.55323e-05
SMUG1	25.5167	14.4837	-0.805987	4.38009e-06	1.56036e-05
UBN1	7.2402	13.2393	0.866232	4.38172e-06	1.56059e-05
OGDH	13.5883	24.7098	0.866506	4.43657e-06	1.57939e-05
ZKSCAN1	6.85575	12.4387	0.865462	4.45085e-06	1.58339e-05
CENPP	5.21604	2.95394	-0.815828	4.59529e-06	1.63252e-05
FLCN	5.40716	9.99126	0.867181	4.60299e-06	1.63488e-05
RABEPK	20.8925	11.9327	-0.803058	4.81824e-06	1.70781e-05
ACAT2	51.8449	29.8626	-0.794013	4.83847e-06	1.71342e-05
MON1B	6.54923	12.0029	0.864859	4.97978e-06	1.76064e-05
ZNF613	5.12265	2.89961	-0.824182	5.18424e-06	1.82876e-05
MAP3K14	5.28628	9.66964	0.863337	5.2003e-06	1.83359e-05
RALGAPA1	3.70358	6.70394	0.863583	5.3181e-06	1.87129e-05
USP22	17.7198	32.1138	0.854141	5.62296e-06	1.96962e-05
TCEANC2	2.20793	4.02361	0.868474	5.6874e-06	1.99085e-05
MAP2K1	58.5001	34.057	-0.785782	5.71736e-06	2.00043e-05
SERGEF	13.6426	7.77718	-0.803748	5.81957e-06	2.03359e-05
MRPL35	32.9555	18.9014	-0.786181	5.82921e-06	2.03589e-05
RELL1	10.4171	5.96319	-0.796181	5.84368e-06	2.04048e-05
MED7	28.9347	16.534	-0.794657	5.88575e-06	2.05368e-05
PAXIP1-AS2	2.56169	4.86473	0.90523	5.8956e-06	2.05573e-05
SMCHD1	14.7289	26.4803	0.853144	5.89576e-06	2.05573e-05
TPM2	33.4719	19.3541	-0.793011	6.06897e-06	2.11237e-05
IL3RA	9.98838	5.75278	-0.807953	6.06999e-06	2.11237e-05
MXD4	9.31365	16.8716	0.853386	6.22048e-06	2.15892e-05
SLC25A39	85.583	49.5397	-0.783043	6.23043e-06	2.16189e-05
MAP2K3	14.6497	26.4095	0.854524	6.28532e-06	2.17947e-05
KIF1C	4.03199	7.28127	0.852519	6.39423e-06	2.21625e-05
QTRTD1	4.74698	8.5716	0.856027	6.66558e-06	2.3036e-05
NFYB	21.0737	12.1315	-0.782796	6.69217e-06	2.31227e-05
BCL2L2-PABPN1	68.4485	39.4638	-0.779779	6.76094e-06	2.3347e-05
CCNJ	2.32216	4.24247	0.871431	6.93107e-06	2.39109e-05
ANAPC16	60.1286	34.9518	-0.777672	6.98355e-06	2.40866e-05
DNAJC9	63.8951	36.9458	-0.778016	7.04158e-06	2.42813e-05
TMEM9B	59.7444	34.7041	-0.779102	7.05286e-06	2.43148e-05
TTC3	16.7308	29.9284	0.843417	7.23657e-06	2.49103e-05
MYO1G	19.0791	34.2117	0.845277	7.25047e-06	2.49516e-05
SUPT3H	4.62358	2.65095	-0.796387	7.32936e-06	2.5212e-05
ECI1	29.2005	16.8492	-0.787351	7.52999e-06	2.58619e-05
MMD	11.648	6.7129	-0.786271	7.58877e-06	2.60522e-05
TBCCD1	4.69208	8.47447	0.854344	7.65346e-06	2.62627e-05
TMEM222	8.04851	14.5164	0.855987	7.74704e-06	2.65721e-05
PNN	44.1936	78.62	0.840423	7.77612e-06	2.666e-05
NSD1	7.62975	13.6769	0.840386	7.84973e-06	2.68945e-05
KRIT1	8.12309	14.5647	0.842429	7.93882e-06	2.71637e-05
HSPA5	227.433	132.332	-0.771334	7.95553e-06	2.72062e-05
BRF1	3.63064	6.56839	0.850782	8.07566e-06	2.75954e-05
TBCEL	4.61966	8.30546	0.853928	8.20027e-06	2.79904e-05
JAKMIP2	5.32048	3.08548	-0.777864	8.36578e-06	2.85239e-05
PPP1R7	92.6112	54.1918	-0.772035	8.46659e-06	2.88612e-05
CD58	52.9888	30.8931	-0.775471	8.47096e-06	2.88698e-05
ANKRD26	2.34765	4.19281	0.850229	8.68721e-06	2.95418e-05
TTI1	6.42178	11.5478	0.839481	8.7759e-06	2.98173e-05
PABPN1	12.1018	21.6629	0.838411	8.77961e-06	2.98234e-05
CFDP1	61.6109	35.8136	-0.771797	9.01653e-06	3.05812e-05
ST3GAL5	60.0305	35.4275	-0.769378	9.10582e-06	3.08571e-05
SETD2	9.92288	17.6063	0.834859	9.1101e-06	3.08648e-05
KLF16	2.68825	4.87597	0.854185	9.12293e-06	3.09015e-05
GOLGB1	8.91219	15.8876	0.834913	9.14983e-06	3.09724e-05
NCAPD3	10.1601	18.1513	0.834244	9.36389e-06	3.16555e-05
POP5	54.6305	31.6619	-0.774535	9.3749e-06	3.16858e-05
EEF2	243.711	433.838	0.831225	9.44222e-06	3.19064e-05
FYTTD1	58.8059	34.5184	-0.766132	9.5485e-06	3.22374e-05
SLC12A6	4.09197	7.20438	0.839061	9.71148e-06	3.27377e-05
ARHGEF18	5.58114	9.98622	0.833748	9.95092e-06	3.35084e-05
ANXA7	96.5096	56.9226	-0.764558	1.00177e-05	3.37187e-05
SLC25A14	8.77749	5.03143	-0.797183	1.00208e-05	3.37217e-05
CNPY4	13.9039	8.07927	-0.783441	1.00486e-05	3.38081e-05
IQSEC1	9.22276	16.4871	0.830505	1.01791e-05	3.42321e-05
TNPO3	14.3972	25.4734	0.829914	1.04242e-05	3.50337e-05
CBX6	10.2482	18.0306	0.830246	1.05013e-05	3.52699e-05
PMS2	4.02684	7.21915	0.849498	1.0554e-05	3.54391e-05
EVI2B	146.609	86.8104	-0.759308	1.13742e-05	3.80287e-05
PAPSS2	5.31287	3.10351	-0.778087	1.14906e-05	3.83906e-05
RCAN1	18.3534	10.7759	-0.767545	1.14924e-05	3.83906e-05
EID2	17.77	10.304	-0.773962	1.1623e-05	3.87682e-05
TNRC6B	2.38135	4.21551	0.82579	1.18075e-05	3.93415e-05
NFKBIE	19.561	11.5399	-0.764079	1.21423e-05	4.04134e-05
FBXL14	2.98763	5.45431	0.847549	1.23092e-05	4.09513e-05
ATF1	24.5779	14.4446	-0.761101	1.24646e-05	4.14417e-05
RNF146	30.6616	18.1217	-0.759968	1.27062e-05	4.21725e-05
ZNF17	7.46704	4.34105	-0.774395	1.29128e-05	4.27942e-05
STRN4	9.78737	17.3865	0.820283	1.31196e-05	4.34702e-05
ARHGDIB	1067.83	633.198	-0.752791	1.31498e-05	4.35611e-05
SERTAD1	15.3913	8.98972	-0.774132	1.40145e-05	4.62671e-05
TSSC1	30.9509	18.2528	-0.755967	1.47821e-05	4.86356e-05
GCDH	8.37709	14.7566	0.826791	1.49328e-05	4.91e-05
STXBP3	46.9574	27.8263	-0.750534	1.51943e-05	4.99389e-05
RBBP5	7.04146	12.3423	0.816347	1.53412e-05	5.04005e-05
VEGFC	4.38375	2.50917	-0.789924	1.56897e-05	5.15015e-05
MSMO1	37.7605	22.3578	-0.751071	1.57329e-05	5.16324e-05
ARFIP1	29.6694	17.5194	-0.749835	1.58838e-05	5.20836e-05
SMYD3	15.4615	9.03078	-0.76125	1.58877e-05	5.20852e-05
TET3	3.1185	5.45831	0.813197	1.58913e-05	5.2086e-05
ORC3	24.9654	14.7808	-0.751606	1.59202e-05	5.21477e-05
ERF	4.98415	8.82013	0.818622	1.63838e-05	5.36096e-05
DCAF5	9.5128	16.6203	0.81052	1.65621e-05	5.41475e-05
TRABD	13.7853	24.117	0.812986	1.65701e-05	5.41619e-05
RBM18	24.2974	14.4311	-0.749111	1.67035e-05	5.4575e-05
C10orf32	15.2796	9.04472	-0.755239	1.6786e-05	5.48217e-05
XPA	19.6583	11.5596	-0.757438	1.69251e-05	5.52293e-05
TMEM230	147.05	87.1753	-0.744067	1.73391e-05	5.65087e-05
SNAP47	10.1479	17.7377	0.817074	1.76683e-05	5.75092e-05
KHNYN	10.396	18.1673	0.805764	1.81071e-05	5.88631e-05
UBE2D2	66.4246	39.4303	-0.742056	1.85079e-05	6.00781e-05
NPRL3	5.21786	9.23065	0.810795	1.86698e-05	6.0578e-05
AVL9	6.40134	11.1047	0.80637	1.94162e-05	6.28946e-05
MIDN	10.2171	17.8147	0.804241	1.94789e-05	6.30845e-05
KLHDC4	7.65634	13.3265	0.816463	1.95429e-05	6.32788e-05
CD53	466.944	280.232	-0.737825	1.9766e-05	6.39875e-05
TFPI	13.4525	7.96808	-0.748355	1.98334e-05	6.41655e-05
ABCB8	3.6227	6.35593	0.806888	1.99709e-05	6.45837e-05
MCCC1	7.38189	12.8643	0.809958	2.08316e-05	6.72479e-05
POLR2J	67.6576	40.197	-0.7397	2.16152e-05	6.96105e-05
TRIP11	4.57545	7.93508	0.802545	2.18652e-05	7.03133e-05
ZNF598	6.42444	11.1706	0.802062	2.1936e-05	7.05119e-05
CEP85	4.95931	8.6564	0.801601	2.20445e-05	7.08164e-05
FKBP1A	251.077	150.377	-0.733793	2.22548e-05	7.14772e-05
SNAPC3	5.12207	8.92642	0.808748	2.23357e-05	7.16971e-05
AGO2	3.25385	5.66554	0.811591	2.25637e-05	7.23644e-05
G2E3	4.64182	8.03169	0.801506	2.31211e-05	7.39837e-05
SLC23A2	5.6614	9.82207	0.795995	2.32853e-05	7.44476e-05
LNX2	2.8609	4.95606	0.811299	2.35999e-05	7.53759e-05
WRB	23.9664	14.265	-0.740728	2.3887e-05	7.61828e-05
PIGC	43.5597	25.9194	-0.735877	2.40447e-05	7.66541e-05
CMTM7	16.3467	28.4546	0.801397	2.42123e-05	7.71568e-05
SREBF2	15.4748	26.7199	0.790957	2.48966e-05	7.91583e-05
ZNF367	13.6105	8.16826	-0.736658	2.50752e-05	7.96937e-05
UTP14C	5.44858	9.44661	0.795648	2.54753e-05	8.08988e-05
PQLC1	7.24758	12.6334	0.803539	2.57141e-05	8.15903e-05
ELMSAN1	4.7933	8.2929	0.791033	2.62783e-05	8.31593e-05
FGFR1OP2	56.5504	33.9955	-0.729103	2.6445e-05	8.36527e-05
CETN3	29.1985	17.377	-0.735493	2.65322e-05	8.39113e-05
CPT2	5.296	9.1997	0.800763	2.68113e-05	8.47594e-05
TNFAIP8	115.63	69.6387	-0.726242	2.75453e-05	8.69732e-05
TAB1	6.55538	11.3087	0.793455	2.78215e-05	8.77739e-05
SLC5A3	7.53356	12.7684	0.785122	2.91053e-05	9.15632e-05
C17orf62	40.7282	69.9931	0.784015	2.94413e-05	9.25263e-05
RBCK1	17.8927	30.7156	0.783375	3.0744e-05	9.62848e-05
COMMD4	59.0806	35.5075	-0.727042	3.08769e-05	9.6646e-05
ATXN1	6.32031	10.8213	0.783737	3.0936e-05	9.67922e-05
HEATR1	9.63959	16.4419	0.781848	3.09843e-05	9.69235e-05
RPL4	1600.49	965.841	-0.719	3.2009e-05	9.99477e-05
MED21	21.0102	12.64	-0.725251	3.21529e-05	0.000100357
DNAJC13	9.94132	17.0341	0.781442	3.21532e-05	0.000100357
CSNK1E	9.74786	16.786	0.782781	3.2469e-05	0.000101262
TMUB1	12.0952	20.9089	0.784332	3.31954e-05	0.000103278
CBWD3	11.2101	6.66848	-0.737292	3.41872e-05	0.000106172
RFFL	12.4437	21.3454	0.777566	3.53059e-05	0.000109383
BRI3BP	3.88812	6.82875	0.825621	3.54562e-05	0.000109739
GBA2	9.86232	16.8367	0.777738	3.54958e-05	0.000109839
PRKCDBP	8.74722	5.11442	-0.757467	3.56752e-05	0.00011035
NOL6	7.25958	12.3436	0.777881	3.58371e-05	0.000110785
WNK1	22.166	37.7869	0.773488	3.60935e-05	0.000111511
PIP4K2A	90.8319	55.2357	-0.714951	3.64801e-05	0.00011266
ANKH	4.46392	7.56972	0.778995	3.66164e-05	0.000113059
LASP1	183.395	111.358	-0.714129	3.6685e-05	0.000113248
PSMC5	159.685	96.6536	-0.714944	3.7051e-05	0.000114309
SRSF7	122.141	73.9153	-0.714312	3.7156e-05	0.000114588
HIBCH	19.665	11.8548	-0.722952	3.76245e-05	0.000115917
ZFP69	5.98748	3.53704	-0.743928	3.77621e-05	0.000116318
APP	71.4698	43.7205	-0.713772	3.80829e-05	0.00011719
DCAF15	7.95307	13.6442	0.776282	3.99022e-05	0.000122399
C14orf119	31.09	18.8875	-0.714564	3.9987e-05	0.000122635
MICA	5.36318	9.21922	0.797526	4.00902e-05	0.000122903
INIP	24.0483	14.6059	-0.719015	4.18222e-05	0.000127934
EDEM1	15.4691	26.2794	0.768025	4.22414e-05	0.000129166
TMEM242	5.71586	3.46779	-0.721337	4.2256e-05	0.000129185
QSER1	4.13883	7.00265	0.772161	4.22893e-05	0.000129232
C17orf85	5.93299	10.0744	0.768054	4.30212e-05	0.000131343
SUMF2	31.6617	53.3897	0.767811	4.30525e-05	0.000131413
RAP1B	216.819	132.783	-0.707854	4.33036e-05	0.000132127
CCDC12	52.8647	32.0089	-0.715279	4.33468e-05	0.000132233
MTHFR	3.73053	6.41755	0.767706	4.33715e-05	0.000132282
KIAA2026	6.52204	11.0872	0.766929	4.42505e-05	0.000134875
SLC25A20	30.2884	18.3378	-0.71265	4.46917e-05	0.000136148
EDEM3	9.79985	16.5309	0.766393	4.52159e-05	0.000137664
SGCE	12.4648	7.53398	-0.724585	4.60205e-05	0.000139976
SH3BP5	12.4936	21.1008	0.7695	4.6108e-05	0.000140215
MRRF	25.5397	15.5424	-0.712545	4.61253e-05	0.000140215
MAP3K3	7.84125	13.3608	0.765719	4.61909e-05	0.000140384
RAB14	49.7702	30.5004	-0.706234	4.63164e-05	0.000140738
TBC1D22A	4.10211	7.07248	0.773086	4.67141e-05	0.000141891
RGL2	11.0354	18.7545	0.764267	4.68735e-05	0.000142291
MTOR	7.52359	12.7036	0.762715	4.8081e-05	0.000145757
RBBP7	147.161	89.4821	-0.703647	4.87816e-05	0.000147823
ZNF271P	10.5645	6.44314	-0.708695	4.98496e-05	0.000150941
CUL3	25.1816	15.3961	-0.703438	5.01928e-05	0.000151921
PRELID1	160.528	98.3084	-0.702648	5.07322e-05	0.000153434
HMGN4	128.571	78.5911	-0.701988	5.11098e-05	0.000154546
HP1BP3	46.5799	78.4169	0.757559	5.13909e-05	0.000155275
CERS5	30.1449	18.4474	-0.704695	5.20438e-05	0.000157094
ZXDC	4.99288	8.43484	0.764654	5.26591e-05	0.00015881
KLHL5	12.6848	7.77629	-0.702613	5.35495e-05	0.000161262
MED8	36.4218	22.3364	-0.703858	5.36602e-05	0.000161533
TPR	23.5104	39.4712	0.753567	5.60576e-05	0.000168423
RHOC	191.384	117.336	-0.697854	5.6886e-05	0.000170779
PCID2	37.6663	23.1834	-0.701302	5.72186e-05	0.000171711
ZNF45	7.34426	4.47553	-0.709757	5.79986e-05	0.000173816
USP24	9.39894	15.73	0.753218	5.84594e-05	0.000175028
LARP1	24.7517	41.3773	0.751573	5.89844e-05	0.000176532
PSEN2	8.60821	5.26477	-0.71581	5.9393e-05	0.000177618
STK26	39.5109	24.2641	-0.697172	5.97879e-05	0.000178695
NCK2	6.47032	10.9055	0.762861	6.16717e-05	0.000183758
PDPK1	6.96352	11.7615	0.750706	6.27735e-05	0.000186682
RBM8A	51.2502	31.4879	-0.692959	6.40968e-05	0.000190289
SLC9A1	3.98577	6.77092	0.751949	6.45322e-05	0.000191509
ZNF354A	10.1816	6.21667	-0.706214	6.47656e-05	0.000192164
C22orf46	3.67259	6.2009	0.751661	6.62949e-05	0.000196289
AMACR	6.71996	4.09236	-0.707315	6.73958e-05	0.000199396
DBNDD2	27.3995	16.9766	-0.703056	6.90398e-05	0.000203948
ZBED4	4.55777	7.60263	0.749272	6.94852e-05	0.000205186
SEPT7P2	2.36227	4.06999	0.780087	7.00708e-05	0.000206836
ARL14EP	32.9877	20.3239	-0.691818	7.10637e-05	0.000209528
ASAP1	9.09814	15.1903	0.746397	7.1903e-05	0.000211922
WDR1	179.455	111.558	-0.687359	7.23008e-05	0.000212932
SDHAF2	56.1268	34.6335	-0.690044	7.56181e-05	0.000221649
EIF2B4	25.3418	15.6843	-0.693771	7.62519e-05	0.000223422
SMARCA4	13.0961	21.8404	0.737715	8.01672e-05	0.000233922
MRPL57	15.9069	9.81112	-0.690349	8.14626e-05	0.000237523
POR	8.52445	14.2653	0.742824	8.19618e-05	0.000238933
AGPAT3	11.5351	19.0682	0.737466	8.326e-05	0.000242353
DICER1	9.23235	15.3146	0.736948	8.36313e-05	0.000243342
H3F3B	246.519	153.571	-0.681019	8.41005e-05	0.000244616
CFAP20	40.4766	24.9979	-0.687067	8.47609e-05	0.000246352
ALG3	11.4647	19.0479	0.742789	8.61801e-05	0.000250289
CEP164	3.22168	5.3668	0.741058	8.63011e-05	0.000250547
PIM3	12.3853	20.5266	0.740357	8.65132e-05	0.000251068
LIMK1	21.4833	35.5982	0.734026	8.86462e-05	0.00025697
BRAT1	6.5591	10.8552	0.742043	9.03743e-05	0.000261637
CLEC16A	3.66431	6.15587	0.73543	9.05164e-05	0.00026195
FAM53B	8.78261	14.6651	0.735059	9.05654e-05	0.000262043
FAM73A	2.40613	4.01188	0.744429	9.30465e-05	0.00026867
STARD3	12.8194	21.3193	0.733119	9.36989e-05	0.000270312
C17orf49	126.649	79.1342	-0.679325	9.40061e-05	0.000271087
CFAP36	27.6618	17.071	-0.685702	9.44976e-05	0.0002721
GCLM	3.7788	6.27898	0.750492	9.47913e-05	0.000272895
XPC	14.8381	24.6016	0.73145	9.50152e-05	0.000273438
CAMK2G	6.79577	11.2014	0.7368	9.51107e-05	0.000273662
NDUFAF5	7.81511	4.77255	-0.693521	9.70309e-05	0.000278773
ELMOD2	14.527	9.02529	-0.679144	9.92387e-05	0.000284852
PIGO	5.47187	9.10311	0.734983	9.93843e-05	0.000285181
IPP	2.76392	4.64185	0.757687	9.93901e-05	0.000285181
CTDP1	5.72629	9.59445	0.733707	0.00010147	0.000290718
FAM136A	61.3263	37.9954	-0.675857	0.000102181	0.000292538
TTPAL	6.11693	10.088	0.727758	0.000104816	0.00029975
TBRG1	7.41261	12.1962	0.728257	0.000106053	0.000303065
TM9SF3	58.682	36.5704	-0.671837	0.000106377	0.000303935
LRRC58	6.79009	11.1517	0.726547	0.000107529	0.000307113
RDX	12.5287	20.628	0.726919	0.00011005	0.000314082
MRPL30	19.4337	12.1162	-0.673101	0.000110989	0.000316585
NUPL1	13.7372	22.4812	0.725067	0.000111601	0.000318189
CAPZA1	226.377	142.153	-0.669449	0.000111612	0.000318189
HSCB	15.5133	9.59315	-0.689147	0.000113303	0.000322592
TMCO4	5.57135	9.20247	0.731751	0.000113937	0.000324279
WASH1	4.31555	7.19793	0.741206	0.000116893	0.000331979
C2CD2L	4.91447	8.16547	0.725852	0.0001169	0.000331979
KIFAP3	32.5305	20.3563	-0.67049	0.000117484	0.000333578
MRFAP1	109.945	68.9687	-0.668248	0.000117647	0.000333918
ECSIT	8.11091	13.3801	0.733488	0.000118617	0.000336302
ATP5G2	361.886	226.364	-0.667316	0.000118904	0.000337048
SLC35E3	3.44429	5.7677	0.737027	0.000118945	0.000337048
PDCL	17.039	10.6724	-0.672546	0.000120718	0.000341821
GNE	4.21819	6.98362	0.724896	0.000122177	0.000345762
YWHAH	154.02	96.7697	-0.66506	0.000126469	0.000357323
SULF2	16.4087	10.3663	-0.669235	0.000128015	0.000361425
PPP1R3D	4.69769	2.94766	-0.68686	0.000129207	0.000364592
LETM1	6.65415	10.9423	0.71686	0.000129287	0.000364751
GATAD1	7.7524	12.7219	0.717311	0.00013124	0.000370128
XPO4	4.94468	8.1349	0.717459	0.000131323	0.000370281
FAM58A	17.9972	11.1746	-0.676297	0.000133117	0.000375011
ROGDI	9.05449	5.65783	-0.683809	0.000139267	0.000391554
STK11	7.22097	11.9249	0.71404	0.000141989	0.000398919
SRR	9.56956	5.9769	-0.673094	0.000143235	0.000402199
ELP4	11.8248	7.41165	-0.66965	0.000146885	0.000411776
GLE1	42.9008	27.1568	-0.659554	0.000148993	0.000417235
PRMT6	12.3754	7.77391	-0.667678	0.000150398	0.000420788
NOL9	3.99516	6.49697	0.712693	0.000151143	0.00042272
MLLT1	8.03522	13.1335	0.709037	0.000152584	0.000426592
CCNL1	30.0764	48.8588	0.707637	0.000155903	0.000435013
HECTD3	7.11036	11.6694	0.709974	0.000156301	0.000435967
SNUPN	21.677	13.5501	-0.664521	0.000159775	0.000445017
ENTPD6	11.1394	18.1571	0.708854	0.000160403	0.000446524
ADAM17	7.61686	12.4885	0.708131	0.000161336	0.000448959
ABHD14B	42.0434	26.4853	-0.657035	0.000163263	0.00045416
TMEM219	90.3772	57.0988	-0.655435	0.000168531	0.000467387
EXO5	8.42867	5.26613	-0.670879	0.00017143	0.000474664
RAB39B	8.4397	5.31662	-0.662577	0.000172636	0.000477745
SBDSP1	22.2588	13.9825	-0.658584	0.000176281	0.000486876
IK	120.357	76.347	-0.651101	0.000176418	0.000487169
PPIE	57.072	36.2285	-0.653097	0.000177573	0.000489923
ZNF740	8.18805	13.3481	0.700619	0.000186018	0.000512402
IKBKB	13.8709	22.4301	0.69839	0.000189521	0.000521309
MAD1L1	7.44456	12.0299	0.710561	0.000190525	0.000523791
STAT6	29.9024	48.4146	0.695677	0.000193074	0.000530329
ANKS1A	2.98654	4.86271	0.700111	0.000198417	0.000543657
ATR	7.06237	11.3471	0.697667	0.000199129	0.000545512
ATXN7L3	15.0807	24.3757	0.695348	0.000199723	0.00054704
ABCF3	10.3957	16.8315	0.699871	0.000199783	0.000547108
B3GALNT2	5.97395	9.57602	0.696644	0.000212104	0.000578499
ALDH6A1	3.85901	6.27942	0.697266	0.000212831	0.000579973
EXT2	20.8763	13.3114	-0.645814	0.000216113	0.000588133
ABR	15.9841	25.8236	0.690293	0.000219828	0.000597359
C6orf62	164.002	104.718	-0.640331	0.000223545	0.000606927
ATXN1L	5.7342	9.27772	0.689386	0.000229172	0.000620552
ZMYM3	8.02437	12.9237	0.689558	0.000230191	0.000622789
MAP3K11	10.879	17.5975	0.68905	0.000230665	0.000623855
GIN1	4.00262	2.51274	-0.660241	0.000235028	0.000634216
SOS2	8.07606	12.968	0.689173	0.00023635	0.000637451
SEC63	25.3651	16.2189	-0.639042	0.000236468	0.000637658
CENPQ	12.6635	8.00846	-0.650936	0.000238336	0.000642075
PLAGL2	5.62971	9.07614	0.687751	0.000240102	0.000646444
GTF2H3	9.58279	15.3911	0.689593	0.000244352	0.000657087
CENPU	37.4688	23.8735	-0.639121	0.000244405	0.000657117
KATNBL1	14.8467	9.43191	-0.643249	0.000245968	0.000660841
TEN1	13.8034	8.67596	-0.6584	0.000246003	0.000660841
CLDND1	67.8128	43.0407	-0.637382	0.000246858	0.000662906
MBD3	14.5803	23.4424	0.686389	0.000253359	0.000679306
DCPS	10.0878	16.1845	0.693529	0.000264075	0.000706326
LOC100294145	12.4218	7.94393	-0.637796	0.000278055	0.000741416
TMEM107	7.06395	4.50036	-0.654936	0.000298307	0.000791874
CPPED1	9.56013	6.2028	-0.632521	0.00030282	0.000803168
OTULIN	7.7463	12.3048	0.673835	0.000313196	0.000828844
MRPS30	26.3754	16.8625	-0.631941	0.000314374	0.000831536
NUP88	33.8955	21.7709	-0.628043	0.00031563	0.000834573
IDH3B	69.1062	44.6049	-0.627282	0.000315999	0.000835121
SECISBP2L	8.66884	13.8411	0.67286	0.000318571	0.000841488
SDR39U1	13.3003	21.2317	0.678853	0.000319051	0.000842469
HDLBP	26.9377	43.0247	0.670512	0.000319123	0.000842515
SPG11	11.5224	18.3717	0.67092	0.000322913	0.000850783
CHAMP1	7.65533	12.2016	0.674894	0.000323686	0.000852384
RAB29	24.1174	38.1387	0.670858	0.000330481	0.000868361
TRAK1	6.47688	10.306	0.672353	0.000338143	0.000886838
BCDIN3D	6.2785	4.00782	-0.637503	0.000339039	0.000888738
ARHGEF12	8.53549	13.5352	0.669021	0.000341981	0.00089554
RMND5B	7.66499	12.1261	0.677674	0.000344313	0.000901344
PBX3	12.3148	7.93938	-0.630661	0.00034532	0.000903825
SLC9A6	11.6176	7.48645	-0.626154	0.00035065	0.000916538
ZMYM2	10.6609	16.8581	0.666275	0.000355969	0.0009295
ANKHD1	30.0001	19.4202	-0.62064	0.000356803	0.000931365
ATXN7	7.7191	12.2718	0.666157	0.000362855	0.000945728
LONRF1	3.50564	5.60248	0.682287	0.00036453	0.000949934
LSP1	105.022	166.018	0.663658	0.000370205	0.000963752
AP2A2	8.13162	12.8589	0.666122	0.000371377	0.000966479
GOLT1B	29.7926	19.359	-0.619481	0.000378625	0.000983194
SNRPD3	49.5912	32.0975	-0.617586	0.000382087	0.000991189
RCC2	40.5132	62.973	0.661058	0.000389249	0.00100943
ASCC1	21.336	13.8035	-0.620433	0.000393082	0.00101886
ERI2	6.75503	4.34073	-0.62824	0.000393514	0.00101964
CCDC124	22.2257	35.1563	0.666268	0.000394617	0.00102214
C9orf78	71.0039	46.088	-0.616625	0.000398128	0.00103056
ACTR3	162.886	106.342	-0.614147	0.00040027	0.00103593
SPET2	185.663	121.167	-0.613078	0.000411491	0.00106284
DYNC1H1	14.5037	22.7671	0.657079	0.000415791	0.00107324
PIK3CA	6.79586	10.6762	0.668482	0.000415795	0.00107324
C5orf28	9.90446	6.36882	-0.622972	0.000417406	0.00107704
HECTD1	10.7127	16.8032	0.658738	0.00041953	0.00108216
IKBKE	13.1595	20.6467	0.659283	0.000421882	0.00108769
ARL1	32.7699	21.3306	-0.614018	0.000424149	0.00109299
RNF214	5.3694	8.51984	0.668798	0.000426759	0.0010988
CAMLG	28.6141	18.556	-0.615362	0.000430996	0.00110787
MSL1	16.8856	26.4747	0.655903	0.000434148	0.00111505
UPF3B	25.0187	16.1866	-0.614676	0.00044302	0.0011367
SERTAD2	15.3509	10.0474	-0.613294	0.000445172	0.00114109
MLLT10	9.94699	15.628	0.65669	0.000449269	0.00115064
ANP32A	137.522	89.791	-0.609428	0.000450231	0.00115291
GEMIN8	9.37206	6.0896	-0.620498	0.000452053	0.00115662
INPP1	18.6944	12.1626	-0.616477	0.00045687	0.00116741
COA5	28.4733	18.5025	-0.613195	0.000466335	0.00118983
NUDCD3	11.0374	17.2104	0.653559	0.000466505	0.00119006
ELAC1	7.24529	4.65561	-0.625507	0.000468302	0.00119426
FBXO18	12.8298	20.132	0.652022	0.000481268	0.00122354
IRAK1	22.1752	34.6525	0.651137	0.000483468	0.00122849
AKAP10	8.68944	13.6985	0.653038	0.000483945	0.0012295
KAT6A	8.1212	12.7332	0.649304	0.0004941	0.00125365
SPCS3	82.4398	54.0635	-0.605077	0.000494282	0.00125391
RAD23A	31.3708	48.7461	0.64891	0.000512194	0.00129553
NFX1	10.6254	16.5744	0.649632	0.000519162	0.00131144
THUMPD2	14.0298	9.07523	-0.611352	0.00052416	0.00132299
TRMT61B	12.1152	7.84669	-0.614675	0.000526662	0.00132887
TEX264	38.6425	25.3506	-0.607478	0.000529874	0.00133611
AKIRIN1	20.7926	32.5256	0.646572	0.000536741	0.00135188
GALK2	8.6148	5.61837	-0.611527	0.000540715	0.00136012
ACSF3	3.09777	4.91523	0.655691	0.000541195	0.00136089
STT3B	99.7846	65.3556	-0.600107	0.000549367	0.00137942
DHDDS	5.28859	8.29052	0.652989	0.00055207	0.00138599
DHTKD1	4.75114	7.44034	0.646968	0.000554346	0.00139058
SAV1	4.47743	6.98003	0.659797	0.000554528	0.00139081
USP42	2.66889	4.17684	0.655173	0.000576292	0.00144073
TANGO2	9.60052	15.1165	0.646489	0.000578062	0.00144422
SERTAD3	13.6438	8.8957	-0.614095	0.00058384	0.00145702
SUPT20H	12.4692	19.4571	0.641646	0.000607364	0.00151231
VGLL4	7.33029	11.4003	0.640269	0.000613192	0.00152486
INTS2	5.42555	8.44678	0.640883	0.000614357	0.00152752
NUP205	15.1129	23.4602	0.636534	0.00062992	0.0015637
EXTL3	3.776	5.89773	0.63853	0.00064722	0.00160485
CYB5B	37.9259	25.0545	-0.593186	0.000654301	0.00162007
CALML4	7.2104	4.71877	-0.599559	0.000661702	0.00163683
PDZD11	46.5299	30.6426	-0.594805	0.000682083	0.00168295
SLC35B3	23.1412	15.2788	-0.595516	0.000691326	0.00170467
GPR132	6.34549	9.8767	0.637539	0.00070939	0.00174588
ATP6V0A2	6.45989	9.94051	0.633115	0.000715734	0.00176037
TTC27	14.4619	9.51307	-0.594134	0.000723186	0.00177673
SPECC1L	6.33382	9.80375	0.629153	0.000746025	0.00182849
SMIM13	6.19968	4.08016	-0.59594	0.000748021	0.0018331
ZNF559	12.9555	8.58692	-0.592315	0.000764341	0.00187131
RORA	5.6069	8.61948	0.630306	0.000771905	0.00188715
EBLN3	15.6894	24.0047	0.625123	0.000796011	0.0019418
MGAT4B	10.0749	15.6004	0.626499	0.000802559	0.00195654
ZDHHC7	13.303	20.4672	0.6217	0.000868306	0.0021026
FRYL	7.58865	11.597	0.620386	0.000874217	0.00211559
CHCHD5	21.3723	14.0452	-0.598462	0.000875791	0.00211841
ACOX3	4.03437	6.2603	0.632014	0.000882851	0.00213449
AGPAT6	7.70828	11.85	0.619942	0.000896835	0.00216526
FBXO31	3.12513	4.80105	0.624643	0.000904177	0.00218162
ZAK	5.31912	8.13681	0.622535	0.000914505	0.00220448
TNRC6A	6.51089	9.96003	0.616703	0.000929019	0.00223734
EXOC3	12.7402	19.6028	0.617863	0.000929147	0.00223734
DDX24	34.4728	52.6463	0.614095	0.00097349	0.00233614
TICAM1	3.97543	6.17551	0.622268	0.000978221	0.0023464
TIPARP	10.9231	16.6556	0.617999	0.000990905	0.00237446
LOC158960	5.79334	3.65362	-0.650486	0.00100281	0.00240018
APAF1	5.78516	8.86713	0.611856	0.00102363	0.0024451
REST	8.97114	13.6855	0.611728	0.001036	0.00247352
C12orf73	5.44388	3.54766	-0.599254	0.00104027	0.00248331
DOLK	6.33036	4.22304	-0.59085	0.00106938	0.00254771
PBRM1	11.331	17.2006	0.60863	0.00107609	0.00256094
COMT	11.6653	17.7259	0.613191	0.00108687	0.00258343
KCTD20	15.0971	23.0085	0.607164	0.00110383	0.00262013
ELMO1	7.8689	12.0043	0.608059	0.00111011	0.00263381
VPS8	7.54452	11.4678	0.608944	0.00113178	0.00268277
LARP4B	6.89105	10.4675	0.606719	0.0011333	0.00268563
SLC37A4	7.21327	11.0374	0.613222	0.00114872	0.00271877
APPL2	7.21571	10.992	0.607554	0.00117925	0.00278294
SRPK2	13.9395	21.0096	0.604693	0.00121632	0.00286302
ARAP1	20.23	30.6127	0.593912	0.00139448	0.00324492
AFF1	7.91347	11.9293	0.595092	0.00140116	0.00325851
BAG5	10.1844	15.2575	0.594831	0.00143144	0.00332245
MCM3AP	15.56	23.3109	0.588935	0.00151692	0.00350667
ZNFX1	12.7772	19.1327	0.589327	0.00152617	0.00352543
AREL1	10.6538	15.8684	0.589224	0.00158373	0.00364805
MB21D1	9.9976	15.1381	0.59435	0.00159559	0.00367375
MTMR12	5.64142	8.46187	0.589288	0.00164035	0.00376561
DIS3L	8.9443	13.3915	0.586654	0.00169157	0.00387
NSUN4	3.49191	5.21074	0.587048	0.00184084	0.00418067
TSC22D2	3.2034	4.77195	0.591314	0.00184596	0.00419167
CDK8	5.43539	8.14399	0.591376	0.00201882	0.00454886
CBX8	3.6732	5.50419	0.592572	0.00242532	0.0053788

## Sheet: G
Table S5G. List of differentially expressed genes in STAD
Gene	Expr_mean(EBV–)	Expr_mean(EBV+)	logFC	PValue	FDR
BANCR	0.641593	16.614	4.78728	0	0
DLGAP1-AS5	0.551607	7.16169	3.73211	5.3731e-196	1.05399e-192
DLK1	22.4243	0.0119383	-10.8871	3.18865e-174	4.81143e-171
BPIFB2	16.4889	0.00883458	-10.5917	2.24054e-172	3.13932e-169
REG1B	85.5976	0.101707	-9.70262	8.48347e-170	1.10941e-166
MUC21	46.808	0.0627488	-9.69874	2.47649e-169	2.85758e-166
RHCG	76.2192	0.10892	-9.56226	2.82269e-169	3.0761e-166
MAGEA4	11.8261	0.0123359	-9.98363	2.94826e-155	2.75395e-152
GAST	77.8414	0.186202	-8.84167	9.89922e-149	7.76732e-146
CLDN3	112.635	0.409462	-8.11953	1.12895e-143	8.20206e-141
TGM3	25.9174	0.0843654	-8.30815	3.19373e-143	2.23744e-140
CTRB1	25.1799	0.0610535	-8.92074	4.05076e-142	2.64865e-139
APOC3	26.1104	0.0677356	-8.97412	1.06863e-135	6.3522e-133
APOA4	49.7123	0.24306	-7.80214	2.54449e-134	1.46802e-131
CALCA	6.1093	0.00664088	-9.77566	2.81657e-127	1.41666e-124
APOB	9.24425	0.0606741	-7.3104	8.14887e-127	3.99621e-124
MAGEA2	4.44375	0.0130301	-8.24325	5.0987e-126	2.43942e-123
CPA2	31.2682	0.20857	-7.26652	4.97557e-123	2.2182e-120
CLCA1	13.4607	0.0911702	-7.18901	1.27079e-122	5.5395e-120
CHGB	15.8288	0.106393	-7.20377	4.46116e-122	1.86192e-119
FABP1	108.11	0.792816	-7.15727	1.38482e-121	5.54379e-119
LEFTY1	14.2491	0.103153	-7.17831	6.91676e-118	2.60921e-115
PRAME	6.24009	0.0420569	-7.19401	1.08413e-116	4.01249e-114
S100A7	79.3259	0.685762	-6.76256	6.04892e-115	2.11885e-112
CLDN6	10.48	0.0766566	-7.04202	1.22251e-114	4.13462e-112
GAGE12G	6.72407	0.0137075	-9.31104	3.81173e-113	1.2673e-110
CTAG1B	4.25648	0.00455656	-9.9395	4.55735e-113	1.48995e-110
APOA1	89.4388	0.909556	-6.65268	8.6803e-113	2.74633e-110
CTAG2	5.19167	0.0254885	-7.73272	1.38977e-108	4.00907e-106
REG3G	15.8913	0.153415	-6.90528	9.09754e-108	2.51348e-105
CXCL10	26.4835	194.839	2.90065	3.50598e-107	9.16978e-105
CA1	6.19017	0.0495219	-7.12053	1.04002e-106	2.64948e-104
ICAM4	0.898539	6.89799	2.95006	5.41024e-106	1.34338e-103
CXCL9	32.3278	237.284	2.8854	6.24491e-106	1.53125e-103
CDX1	26.3264	0.324943	-6.30768	1.04129e-105	2.52173e-103
GCG	4.76025	0.033835	-7.06743	1.83525e-105	4.33738e-103
CXCL11	8.90983	64.1835	2.87943	5.01612e-105	1.14414e-102
MUC12	6.54345	0.0899972	-6.17512	2.94714e-104	6.64494e-102
FGL1	8.31757	0.0845439	-6.77296	3.07231e-104	6.84846e-102
KLK13	16.3912	0.199288	-6.29922	8.18432e-104	1.78382e-101
ZNF683	1.56664	11.4164	2.89136	8.48505e-104	1.82904e-101
ALPI	4.99862	0.0663845	-6.37225	2.99374e-101	6.1816e-99
MUC2	16.7388	0.267395	-5.93996	3.33033e-99	6.4681e-97
TF	7.16844	0.104199	-6.11871	4.66657e-99	8.97446e-97
PKP1	9.88171	0.155884	-5.94491	1.87959e-98	3.54519e-96
TM4SF20	18.9368	0.30367	-5.94787	4.33497e-98	7.94718e-96
MEP1A	12.9966	0.218634	-5.90564	1.03434e-96	1.81157e-94
SPRR2D	27.0788	0.408207	-5.95862	1.33114e-96	2.31076e-94
PGA5	194.989	3.46784	-5.82569	3.15136e-96	5.42255e-94
CT83	6.89675	0.0650709	-6.94882	4.4403e-96	7.57399e-94
CYP3A4	6.30371	0.103302	-5.95629	7.03104e-96	1.159e-93
GJB6	4.02001	0.0579189	-5.99949	2.38498e-94	3.68376e-92
ITLN1	42.3044	0.799206	-5.72364	1.81249e-93	2.69346e-91
FABP2	7.47653	0.134667	-5.8389	8.67112e-93	1.25995e-90
CRABP1	6.28707	0.0946071	-6.19637	1.02868e-89	1.36342e-87
C6orf58	20.8234	0.430241	-5.60892	1.19895e-89	1.57843e-87
EEF1A2	10.7758	0.222287	-5.58295	1.61896e-89	2.10315e-87
PRSS21	8.66989	0.162252	-5.76759	3.09508e-89	3.99428e-87
INSM1	5.63487	0.112149	-5.60861	6.28447e-89	7.9533e-87
SOX8	1.2946	8.33309	2.70217	1.11019e-88	1.36966e-86
C10orf99	6.38017	0.100814	-5.83132	2.17141e-88	2.59722e-86
DUOX2	32.0052	0.748345	-5.41212	7.63204e-88	8.85859e-86
GUCY2C	12.0325	0.284919	-5.37284	3.19422e-87	3.6429e-85
KLK12	4.76585	0.0718365	-5.84288	3.91611e-87	4.44037e-85
ATP4B	23.8968	0.584071	-5.46634	1.81019e-85	1.98373e-83
DEFA6	25.9656	0.598053	-5.75465	6.84064e-85	7.33257e-83
LOC101928353	6.36958	0.11894	-5.66807	1.06076e-83	1.11272e-81
IL10	1.1552	7.36792	2.62129	7.69225e-82	7.8182e-80
CEL	53.9288	1.5372	-5.11715	9.03452e-82	9.13511e-80
PEG10	8.91666	0.255006	-5.13039	1.00463e-81	1.01061e-79
HOXA10	8.87928	0.241585	-5.13678	2.68991e-81	2.69211e-79
SUCNR1	1.60687	9.76071	2.61218	3.07476e-81	3.06165e-79
CXCR2P1	0.977321	5.90762	2.60577	1.7461e-80	1.71257e-78
SST	22.3475	0.634607	-5.22758	1.84396e-79	1.77309e-77
CD274	2.23521	13.0887	2.56105	9.78117e-79	9.13654e-77
CNFN	71.3137	2.27074	-4.94969	7.42421e-78	6.74228e-76
ORM2	10.2858	0.292841	-5.21913	8.31077e-78	7.51263e-76
NCCRP1	11.6686	0.357848	-5.02987	1.68013e-77	1.51181e-75
GBP5	8.41969	48.3299	2.5387	1.71877e-77	1.53952e-75
CHP2	6.96407	0.217522	-5.00591	2.39654e-77	2.12717e-75
CYP17A1	4.58304	0.130999	-4.96463	9.96266e-77	8.53395e-75
CDH17	70.0889	2.39986	-4.85649	3.63224e-76	3.04488e-74
PCSK1N	27.4506	0.914729	-4.9191	3.80351e-76	3.17488e-74
HPN	5.00374	0.155387	-5.09446	1.72824e-75	1.41255e-73
SCGB3A1	15.6599	0.502626	-4.937	3.57113e-74	2.82465e-72
DEFA5	44.5295	1.63055	-4.90867	3.96346e-73	3.01346e-71
SI	14.6435	0.571185	-4.69864	6.64306e-73	5.01193e-71
WNT11	5.63046	0.201963	-4.8316	2.12273e-72	1.57725e-70
CHGA	39.24	1.52645	-4.64762	1.73056e-71	1.25728e-69
SLC13A2	5.89953	0.224096	-4.733	2.40848e-71	1.73694e-69
PNLIPRP2	9.74076	0.374663	-4.65395	7.65662e-71	5.50155e-69
DUOXA2	25.7923	1.11271	-4.5532	3.10394e-69	2.12891e-67
TM6SF2	7.31646	0.297488	-4.63739	3.54258e-69	2.40454e-67
MUC6	69.6624	3.10912	-4.48074	2.69417e-68	1.77942e-66
ORM1	18.4053	0.824362	-4.49974	1.75563e-67	1.14035e-65
IDO1	27.6561	143.533	2.3953	1.89876e-67	1.2252e-65
ENTPD8	5.81699	0.2543	-4.54121	2.69431e-67	1.73284e-65
SPINK7	10.8843	0.420009	-4.87897	7.373e-67	4.63554e-65
BEX1	6.57575	0.270343	-4.58516	1.06998e-66	6.68428e-65
HOXC10	8.16454	0.366831	-4.44501	1.16108e-66	7.2075e-65
KRT7	95.9076	4.56506	-4.37873	3.64809e-66	2.20867e-64
NPW	7.9868	0.358561	-4.52585	3.21622e-65	1.89458e-63
PPP1R1B	164.868	8.18486	-4.32377	4.1275e-65	2.41686e-63
RBP4	29.8506	1.51985	-4.30411	1.99402e-64	1.15043e-62
FXYD4	4.11259	0.155679	-4.68965	2.88719e-64	1.6416e-62
GBP6	6.67909	0.341873	-4.25072	1.70575e-63	9.37257e-62
SLC26A9	4.04439	20.3486	2.3339	2.88061e-63	1.57838e-61
COL9A3	8.25644	0.442601	-4.23097	5.95886e-63	3.24692e-61
SLC34A2	6.23596	0.333097	-4.26826	9.69812e-63	5.2552e-61
DUOXA1	4.5346	0.22164	-4.31015	1.50262e-62	8.05337e-61
CST6	5.63518	0.248184	-4.55485	2.58522e-62	1.37803e-60
FAM3B	30.1108	1.66107	-4.18562	4.215e-62	2.23464e-60
ANPEP	175.398	9.97361	-4.14323	2.31931e-61	1.21321e-59
DUOX1	4.97625	0.289202	-4.12257	3.89088e-61	2.00324e-59
UPK1B	5.3204	0.289303	-4.21744	1.28144e-60	6.52904e-59
PRAP1	77.8232	4.47009	-4.09928	2.09742e-60	1.06313e-58
CAMK2N2	1.97682	9.65143	2.31468	2.52013e-60	1.27409e-58
RTBDN	1.47601	7.27269	2.32256	7.26043e-60	3.63318e-58
LGALS7	10.0759	0.544782	-4.18962	2.29763e-58	1.10738e-56
SLC26A3	6.12981	0.387179	-3.98766	4.41502e-58	2.11748e-56
DUSP27	4.25978	0.265389	-3.96416	4.95139e-58	2.36318e-56
FBXO2	8.45957	0.518909	-4.03255	5.77484e-58	2.74284e-56
KLK1	15.1759	0.927192	-4.04339	8.24052e-58	3.89509e-56
SMOC1	5.07444	0.318451	-3.98316	8.97813e-58	4.23353e-56
TGM1	10.0791	0.641963	-3.92834	5.36465e-57	2.45871e-55
MIA-RAB4B	0.958051	4.5844	2.2889	6.15311e-57	2.80696e-55
WDR72	5.13019	0.340304	-3.9363	7.11433e-57	3.23793e-55
HOMER2	5.28396	0.341036	-3.95435	4.58271e-56	2.03842e-54
TPD52L1	12.4484	0.846448	-3.87747	1.05084e-55	4.64263e-54
SLC6A20	7.182	0.506295	-3.83344	7.30095e-55	3.14759e-53
SLC22A3	5.12546	0.36507	-3.82055	1.07935e-54	4.62282e-53
C8G	5.20525	0.327333	-3.9973	1.70578e-54	7.25826e-53
XPNPEP2	6.85562	0.501243	-3.81249	1.75081e-54	7.43373e-53
SLC7A9	4.29857	0.288863	-4.00145	1.92315e-54	8.13027e-53
PON3	4.49735	0.298635	-3.92006	1.99624e-54	8.42113e-53
CDHR2	15.9928	1.18226	-3.7654	1.22597e-53	5.08428e-52
PRKCG	1.2497	5.61431	2.18142	2.35792e-53	9.67637e-52
SLC29A4	5.56109	0.410236	-3.7524	2.76653e-53	1.13295e-51
SCGB2A1	4.34292	0.259015	-4.02406	1.55313e-52	6.2559e-51
CHIT1	3.25569	14.6247	2.162	1.56229e-52	6.27989e-51
WARS	109.037	478.61	2.15032	2.31418e-52	9.24541e-51
NKD2	4.52617	0.345356	-3.73858	1.48029e-51	5.76137e-50
GAL	12.7549	0.968472	-3.68746	2.31974e-51	8.95747e-50
COL22A1	0.978225	4.2842	2.1379	3.28276e-51	1.26017e-49
CAPN9	4.94575	0.382429	-3.7134	5.25411e-51	2.00515e-49
SLC6A8	31.3927	2.54231	-3.62516	8.20572e-51	3.1074e-49
GZMH	3.57989	15.4998	2.14099	1.11512e-50	4.20656e-49
KLK10	25.7914	2.09476	-3.61467	1.35921e-50	5.09797e-49
PRODH	6.2085	26.694	2.12132	1.72243e-50	6.43564e-49
NTS	12.0329	0.972265	-3.57706	5.30958e-50	1.93233e-48
FAM83A	6.62305	0.556319	-3.57223	8.2908e-50	2.98408e-48
C11orf86	5.71293	0.462414	-3.67292	2.56053e-49	9.11566e-48
KRT13	268.693	23.0483	-3.49992	2.14355e-48	7.45528e-47
MT1H	13.6206	1.12395	-3.62177	3.14622e-48	1.08847e-46
TTR	9.60435	0.82218	-3.54667	3.7755e-48	1.29703e-46
ACHE	8.84273	0.801023	-3.46747	1.43301e-47	4.85491e-46
CHST5	6.11802	0.556425	-3.43703	3.57393e-47	1.19635e-45
MT1A	5.16907	0.400252	-3.7167	3.91934e-47	1.30751e-45
FOXJ1	4.56523	0.408516	-3.50903	4.99798e-47	1.65889e-45
CX3CL1	10.998	45.3267	2.05383	5.3286e-47	1.76564e-45
VIP	4.76222	0.425995	-3.48473	3.63016e-46	1.16545e-44
PPP1R1A	4.1913	0.377051	-3.50038	3.75435e-46	1.20336e-44
GZMB	11.4076	46.3659	2.04238	3.76772e-46	1.20567e-44
MT1M	12.2023	1.09281	-3.50454	4.08358e-46	1.30462e-44
SLC5A5	4.75051	0.452112	-3.4079	5.40501e-46	1.72118e-44
C14orf105	1.28791	5.30964	2.04076	1.59007e-45	4.99852e-44
MYO7B	12.0656	1.18946	-3.34057	2.88158e-45	8.92972e-44
VSTM2L	4.24662	0.399298	-3.4026	2.90683e-45	8.99376e-44
DPP4	14.9199	1.47748	-3.33927	3.60801e-45	1.10759e-43
DPCR1	69.7558	7.02993	-3.32331	6.75682e-45	2.06451e-43
PPP1R14D	12.8617	1.27024	-3.33032	9.7174e-45	2.9553e-43
RNF186	8.84472	0.881001	-3.33448	1.20942e-44	3.67243e-43
SPINK4	99.0118	9.82626	-3.29757	1.8892e-44	5.68381e-43
MT1G	104.098	10.7227	-3.28894	3.63687e-44	1.08421e-42
IGF2	104.256	10.7513	-3.28367	3.80544e-44	1.13102e-42
SCIN	5.55234	0.571516	-3.28254	5.1786e-44	1.53218e-42
LOC400043	13.227	52.0067	1.98369	2.79737e-43	8.10535e-42
SCNN1A	45.4293	4.90097	-3.23364	3.48124e-43	1.00571e-41
FGFBP1	11.3601	1.20844	-3.21767	7.59222e-43	2.17732e-41
SIX2	6.39246	0.695591	-3.17146	6.10558e-42	1.68924e-40
PNCK	4.23653	0.45299	-3.22743	1.40264e-41	3.84275e-40
HOTS	25.8997	2.86788	-3.14566	2.7371e-41	7.44673e-40
CTLA4	1.81484	7.15022	1.94393	6.37428e-41	1.71992e-39
CD8A	5.87207	22.0879	1.92712	1.74836e-40	4.65342e-39
BMP7	5.96659	0.696218	-3.08096	3.79671e-40	9.9834e-39
GOLT1A	8.46837	0.9812	-3.0898	1.20212e-39	3.08649e-38
PDIA2	7.17025	0.859151	-3.08485	1.52152e-39	3.89637e-38
SOWAHA	4.0666	0.48892	-3.05504	1.7611e-39	4.50402e-38
GBP4	18.4558	68.115	1.89687	3.07456e-39	7.80215e-38
CD38	4.96581	18.5039	1.90325	3.45463e-39	8.75529e-38
PLA2G2D	3.26617	12.0717	1.90381	4.07909e-39	1.02716e-37
CDX2	16.1816	2.02007	-2.99554	1.50438e-38	3.71193e-37
GPA33	19.9428	2.46219	-2.99235	1.61242e-38	3.97353e-37
NR1I2	5.47389	0.689317	-2.97713	2.95675e-38	7.20491e-37
FUT6	6.61198	0.829286	-2.99105	3.97834e-38	9.58713e-37
UGT2A3	6.36952	23.3804	1.87171	6.01385e-38	1.44215e-36
TM4SF4	30.4137	3.90509	-2.95458	8.62124e-38	2.05236e-36
F10	5.48487	0.705352	-2.96735	1.19314e-37	2.82664e-36
ASCL2	19.1323	2.47925	-2.95138	1.21156e-37	2.86682e-36
NKG7	15.2236	54.557	1.86696	1.30678e-37	3.08841e-36
FAM46B	5.27984	0.670723	-2.95926	1.32174e-37	3.11625e-36
CIDEC	6.36416	0.818257	-2.95696	1.32676e-37	3.12433e-36
HMGCS2	54.8709	7.14791	-2.93392	1.99365e-37	4.66119e-36
PRR4	26.2765	3.37774	-2.95287	2.73973e-37	6.36761e-36
F12	4.53903	0.588273	-2.93873	3.1393e-37	7.28763e-36
EPHX3	5.70529	0.744395	-2.93648	3.20492e-37	7.43118e-36
IKZF3	4.88719	17.5684	1.8537	3.2127e-37	7.44041e-36
LYNX1	8.44731	1.1132	-2.9171	5.96852e-37	1.37255e-35
MAGEA6	10.0976	1.35554	-2.91267	7.45148e-37	1.70558e-35
ERICH5	4.05525	0.51852	-2.97005	7.54115e-37	1.72409e-35
REC8	10.4266	37.5402	1.84465	9.3798e-37	2.13203e-35
KLRK1	2.19181	7.83048	1.85656	1.31904e-36	2.98435e-35
PCK1	14.1558	2.01223	-2.85402	5.93714e-36	1.313e-34
MME	6.99316	0.97128	-2.85141	7.00552e-36	1.54405e-34
CYP2B6	6.82574	0.940554	-2.8611	9.98639e-36	2.18631e-34
GAD1	2.31434	8.28145	1.82486	1.47778e-35	3.20665e-34
HOXA13	6.03451	0.842528	-2.82496	2.23237e-35	4.8174e-34
KRT20	73.8779	10.2866	-2.82185	2.30641e-35	4.9717e-34
CRABP2	27.4925	3.80718	-2.81049	3.13856e-35	6.72852e-34
C4BPA	3.09701	10.9304	1.81346	3.97811e-35	8.50977e-34
HAPLN3	7.376	25.5528	1.80613	5.46504e-35	1.15769e-33
ESPN	7.27789	1.05044	-2.80995	5.55544e-35	1.1743e-33
TFF3	124.313	17.4013	-2.8016	5.73814e-35	1.21031e-33
FOLR1	11.6009	1.66552	-2.81007	6.2294e-35	1.30971e-33
FAM26F	6.4234	22.2674	1.81026	7.13702e-35	1.49572e-33
TNFRSF11B	7.27776	1.06121	-2.78077	1.98756e-34	4.09968e-33
PPP1R3C	5.0501	0.730192	-2.77391	2.62379e-34	5.38934e-33
WNK2	9.79724	1.44018	-2.76315	2.94286e-34	6.0384e-33
TNS4	30.7952	104.074	1.78171	4.38639e-34	8.94422e-33
PHGR1	178.02	26.3597	-2.73635	9.91465e-34	1.99677e-32
HLA-DRB3	79.3994	268.882	1.77328	1.02881e-33	2.06774e-32
SCG5	9.43971	1.43225	-2.72429	2.1368e-33	4.25538e-32
TMEM52	4.919	0.720484	-2.76449	3.22811e-33	6.38333e-32
FAM84A	11.5937	1.77686	-2.70532	3.38158e-33	6.68007e-32
UBD	143.36	480.279	1.75779	4.50791e-33	8.84271e-32
KCNH2	8.3357	1.28498	-2.69318	6.73191e-33	1.31135e-31
CXCR6	3.90276	13.1288	1.76087	6.85e-33	1.33303e-31
WFDC2	85.409	13.3364	-2.68883	8.1949e-33	1.5916e-31
HLA-DOA	8.17845	27.3208	1.74664	1.52773e-32	2.93228e-31
CIITA	8.0425	26.8628	1.7443	1.81766e-32	3.47856e-31
TFF2	299.518	47.7699	-2.64625	4.02905e-32	7.6214e-31
PRKCQ	1.26079	4.2077	1.74358	5.28267e-32	9.96393e-31
NNAT	4.7193	0.720834	-2.68391	5.29934e-32	9.98576e-31
PLA2G2A	275.877	910.416	1.72964	6.48777e-32	1.21784e-30
BEX5	4.41793	0.674221	-2.71201	7.06209e-32	1.32311e-30
VNN1	18.7668	3.02297	-2.62715	9.02503e-32	1.68605e-30
ADAMDEC1	6.21884	20.2532	1.7119	4.40394e-31	8.05716e-30
ADIRF	51.9808	8.6377	-2.59091	4.741e-31	8.64307e-30
SUSD4	3.43952	11.2722	1.71701	4.82814e-31	8.79376e-30
DSC2	21.0028	3.50834	-2.57306	8.49299e-31	1.53689e-29
SLC7A2	6.94541	1.1888	-2.55105	2.14833e-30	3.82758e-29
CCNE1	13.3404	2.27395	-2.54509	2.92554e-30	5.17936e-29
CKB	90.9466	15.5385	-2.53376	4.32604e-30	7.6244e-29
SLC15A1	4.62229	0.799816	-2.55351	5.14388e-30	9.0172e-29
SERPINA5	5.83654	1.00071	-2.54739	5.18357e-30	9.07865e-29
VWA2	4.38901	0.746548	-2.53314	5.47164e-30	9.56611e-29
CCR5	2.33767	7.46417	1.68739	5.65778e-30	9.88273e-29
NMU	13.839	2.37382	-2.52922	5.72183e-30	9.98572e-29
DAPL1	5.44108	17.8677	1.69927	6.81178e-30	1.18668e-28
CIB2	7.26675	1.26218	-2.52277	9.89735e-30	1.71659e-28
FLNC	38.4403	6.69308	-2.50979	1.10113e-29	1.89792e-28
QPRT	12.0565	2.11287	-2.51848	1.10202e-29	1.89792e-28
LAG3	4.00866	12.6925	1.68	1.2309e-29	2.11245e-28
APLP1	5.73629	1.01041	-2.50701	2.55723e-29	4.32436e-28
S100A1	4.70407	0.780032	-2.59094	2.96105e-29	4.99862e-28
YBX2	6.35477	1.16706	-2.46615	7.91972e-29	1.30549e-27
LYPD3	23.078	4.25695	-2.45187	1.18988e-28	1.94344e-27
S100A12	5.82049	0.990329	-2.57741	1.63107e-28	2.6508e-27
C1orf115	10.1348	1.87983	-2.44164	2.00824e-28	3.25299e-27
LRRC75B	5.19932	0.946113	-2.45584	2.28287e-28	3.69173e-27
AQP3	37.8014	6.96671	-2.43409	2.6336e-28	4.2519e-27
CCL5	49.6696	152.869	1.63852	2.68077e-28	4.32095e-27
CDKN2A	19.2093	3.54133	-2.43605	2.99135e-28	4.80576e-27
CA9	41.2245	7.63563	-2.42643	3.58596e-28	5.74691e-27
GPT	5.0574	0.938494	-2.44246	5.39926e-28	8.58281e-27
SOCS1	9.99886	30.7038	1.63068	7.33455e-28	1.15841e-26
NOTUM	39.305	7.776	-2.4039	7.75446e-28	1.22374e-26
TNNC1	5.54771	1.00235	-2.50935	8.19035e-28	1.28942e-26
C4BPB	10.9325	2.03069	-2.41241	8.39306e-28	1.32027e-26
KLK11	25.698	4.88331	-2.40238	8.87556e-28	1.39394e-26
CCL28	21.6585	4.07962	-2.40264	9.66631e-28	1.51692e-26
COLCA2	9.90052	30.3437	1.62408	1.31464e-27	2.04993e-26
UCHL1	12.5607	2.3703	-2.39924	1.35987e-27	2.11541e-26
ERICH2	2.14341	6.67469	1.63217	2.16365e-27	3.34191e-26
HEPACAM2	7.34321	1.40846	-2.36208	4.4401e-27	6.78325e-26
PRF1	3.69299	11.1856	1.60939	4.77395e-27	7.28195e-26
C16orf89	5.20846	1.01486	-2.36827	6.60705e-27	1.00313e-25
SLC28A3	2.45089	7.4305	1.59931	9.63726e-27	1.45407e-25
MUC3A	35.1655	6.83602	-2.34191	9.6976e-27	1.46105e-25
GZMA	9.78168	29.2757	1.59994	1.13912e-26	1.70964e-25
CAPS	10.4495	2.08291	-2.33221	2.0139e-26	2.98825e-25
MOGAT2	4.3404	0.837085	-2.39915	2.07579e-26	3.07776e-25
JAK2	7.1627	21.4292	1.58727	2.1124e-26	3.12967e-25
PPL	30.2208	6.02108	-2.31318	3.15569e-26	4.6613e-25
CTSW	4.58693	13.5838	1.58262	6.56712e-26	9.58487e-25
HSPB6	176.111	35.6849	-2.29416	6.59118e-26	9.61283e-25
PFN2	34.6084	7.07793	-2.28561	9.60609e-26	1.39477e-24
SLA2	1.70313	5.04485	1.57759	1.15226e-25	1.6681e-24
GPR171	1.734	5.14577	1.58219	1.19502e-25	1.72872e-24
MUC4	23.5936	4.88887	-2.27334	1.49351e-25	2.15417e-24
LINC00857	4.99417	1.0352	-2.28351	1.87394e-25	2.67729e-24
DEFB1	15.5705	3.18686	-2.2851	1.90787e-25	2.71982e-24
MLXIPL	6.56293	1.37348	-2.25967	2.84682e-25	3.99737e-24
BAAT	2.09517	6.16584	1.55731	3.34305e-25	4.68409e-24
SLAMF7	11.6772	34.0692	1.54814	5.36413e-25	7.41527e-24
FER1L6	7.11194	1.50153	-2.22542	1.03009e-24	1.40614e-23
REEP6	30.0497	6.39409	-2.22699	1.03308e-24	1.40924e-23
SOX2	6.36516	18.2925	1.52768	3.17651e-24	4.2417e-23
IRS2	14.7724	3.25524	-2.18934	4.06817e-24	5.40292e-23
CACHD1	3.21165	9.29871	1.52251	4.34521e-24	5.75917e-23
ZNF185	15.4753	3.40301	-2.18364	4.95254e-24	6.54642e-23
FAM177B	4.08621	0.879688	-2.19611	5.51291e-24	7.27734e-23
CD40	10.9673	31.2214	1.51915	5.80862e-24	7.65224e-23
PLEKHS1	14.5219	41.3944	1.51695	5.95079e-24	7.83427e-23
MAGEA3	13.7878	3.08548	-2.17983	6.36297e-24	8.36569e-23
PLIN4	6.03531	1.31984	-2.17792	6.62962e-24	8.69296e-23
C1QB	167.392	473.327	1.51479	6.74683e-24	8.83483e-23
THNSL2	4.7232	1.0367	-2.18645	6.98723e-24	9.14353e-23
LINC00483	7.45525	1.62222	-2.19696	7.24125e-24	9.46332e-23
SFRP1	7.11032	1.5794	-2.1686	8.7807e-24	1.14143e-22
ELFN1-AS1	6.03294	1.30675	-2.20578	9.48907e-24	1.23026e-22
ATF5	16.9027	47.7094	1.51086	1.01146e-23	1.30789e-22
CGREF1	8.59574	1.92671	-2.16659	1.01395e-23	1.31025e-22
HYAL1	8.29505	1.84049	-2.16839	1.10253e-23	1.42098e-22
GBP1	28.8652	80.9897	1.50274	1.74482e-23	2.23119e-22
EGR2	4.14303	12.0519	1.50494	1.75992e-23	2.24903e-22
GPRC5B	21.3637	60.7174	1.50274	1.77465e-23	2.26637e-22
CASC9	4.40269	0.982793	-2.18643	1.91002e-23	2.43767e-22
ITGAE	3.38624	9.54536	1.50304	2.20421e-23	2.79494e-22
REG4	367.111	81.482	-2.13992	2.65004e-23	3.34296e-22
ICAM1	29.5763	82.8784	1.49337	3.56288e-23	4.46578e-22
ZP3	5.08233	1.14314	-2.14602	3.94185e-23	4.92506e-22
DSG3	11.4133	2.55304	-2.12667	4.35839e-23	5.43165e-22
USP30-AS1	1.81797	5.1559	1.51874	4.74592e-23	5.90336e-22
FOXP2	4.93335	1.1221	-2.12248	6.81301e-23	8.41587e-22
FKBP10	48.1942	11.2167	-2.1126	7.69782e-23	9.48496e-22
L1CAM	5.30003	1.22975	-2.10869	9.21276e-23	1.1309e-21
HSPB8	26.4252	6.08911	-2.10425	1.10021e-22	1.3455e-21
FUT3	28.4639	6.61242	-2.10194	1.21981e-22	1.48712e-21
CKMT1B	42.8614	9.95937	-2.09888	1.33731e-22	1.62734e-21
HLA-DQA1	57.5414	158.83	1.4748	1.45923e-22	1.77459e-21
C1QA	92.6396	253.038	1.46652	2.71162e-22	3.26326e-21
IGSF6	8.3598	23.0531	1.47057	2.82103e-22	3.38662e-21
PDE9A	4.06125	0.968043	-2.0687	5.55147e-22	6.57992e-21
AKR7A3	66.5936	15.9469	-2.05614	6.68526e-22	7.88089e-21
ADAM28	7.91682	21.6014	1.45225	8.02072e-22	9.3931e-21
LINC00261	7.06218	1.69687	-2.04981	8.15815e-22	9.54265e-21
PRUNE2	10.6819	2.57255	-2.04669	9.23019e-22	1.07838e-20
CXCL17	99.4773	269.8	1.44749	1.11925e-21	1.30091e-20
CMKLR1	2.79906	7.66357	1.44944	1.12013e-21	1.30091e-20
APOC1	87.3591	234.679	1.4476	1.16703e-21	1.35378e-20
TFCP2L1	4.18151	1.026	-2.03071	1.78558e-21	2.0495e-20
CTF1	4.47021	1.09039	-2.03112	3.17322e-21	3.59802e-20
CKMT1A	35.2789	8.71222	-2.01247	3.50934e-21	3.97455e-20
SLAMF8	7.46502	20.0147	1.43271	3.53611e-21	4.00256e-20
GGT6	15.1908	3.80511	-2.00572	4.31029e-21	4.87043e-20
OBSL1	8.82946	2.20739	-2.0073	4.43562e-21	5.0034e-20
MLK7-AS1	2.70747	7.30959	1.43051	5.12852e-21	5.77503e-20
PSCA	192.863	48.0094	-1.99805	5.76543e-21	6.47736e-20
PAK6	4.1284	1.04282	-1.99654	6.30537e-21	7.06778e-20
RHOD	28.4662	7.20705	-1.98903	8.90856e-21	9.90648e-20
AHNAK2	10.6242	2.68613	-1.98088	1.06423e-20	1.17943e-19
ECHDC2	12.3432	3.10992	-1.98165	1.17657e-20	1.30026e-19
HLA-DQB1	90.4725	239.553	1.41426	1.1837e-20	1.3074e-19
RHOF	25.5782	6.4851	-1.97868	1.23768e-20	1.36625e-19
SIRPG	3.65294	9.71572	1.42386	1.26328e-20	1.39373e-19
CD300LF	1.94398	5.17978	1.42445	1.36412e-20	1.50076e-19
HLA-DQB2	2.02066	5.36902	1.4335	1.488e-20	1.63329e-19
PTGS2	8.48868	2.15465	-1.97304	1.48874e-20	1.63329e-19
RBPMS2	12.8481	3.23741	-1.97485	1.56774e-20	1.71804e-19
CD3G	3.31502	8.80367	1.41645	2.07548e-20	2.26433e-19
CBX2	2.98652	7.9072	1.40727	2.3401e-20	2.54171e-19
CERS4	8.37087	2.13718	-1.96397	2.55641e-20	2.77359e-19
B3GNT8	6.10081	1.54874	-1.96983	2.6192e-20	2.84014e-19
HBB	71.687	18.3307	-1.95926	2.62219e-20	2.84182e-19
PLA1A	4.4694	11.8218	1.40703	2.84846e-20	3.08193e-19
NEBL	5.16033	1.3119	-1.94818	4.03079e-20	4.31829e-19
AMOT	4.36849	11.5881	1.39668	4.29722e-20	4.59871e-19
FCGR3A	25.0181	65.1613	1.3925	5.58683e-20	5.92705e-19
TCEA3	24.3364	6.3617	-1.93381	6.36155e-20	6.73438e-19
IL2RB	7.68824	20.0339	1.39101	6.50434e-20	6.88183e-19
HBA1	67.5847	17.6256	-1.93076	7.60989e-20	8.04286e-19
CDKN1C	12.9584	3.4186	-1.93063	7.9906e-20	8.43615e-19
PRRX2	6.92612	1.82571	-1.92833	1.15932e-19	1.21287e-18
CLDN2	31.3385	80.7766	1.38101	1.20723e-19	1.26164e-18
LGR6	5.37439	1.42566	-1.91633	1.2203e-19	1.27462e-18
LAMP3	6.32526	16.4027	1.38192	1.27364e-19	1.32893e-18
GRIN2D	9.19865	2.44874	-1.91595	1.30003e-19	1.35502e-18
TTC22	10.715	2.83355	-1.91841	1.31099e-19	1.36572e-18
HLA-DPA1	171.02	441.514	1.37696	1.56256e-19	1.62262e-18
AOAH	3.97101	10.2624	1.38038	1.65827e-19	1.71927e-18
TPM2	287.352	75.7368	-1.9053	1.70346e-19	1.76426e-18
C1QC	122.565	314.836	1.37466	1.84783e-19	1.91076e-18
MSX2	6.84689	17.7741	1.3766	1.89258e-19	1.95394e-18
RARRES1	29.7739	8.0339	-1.90116	2.11196e-19	2.1747e-18
FCGR1A	3.09657	7.95873	1.37617	2.56983e-19	2.62825e-18
BPIFB1	121.678	313.86	1.36943	2.62659e-19	2.68489e-18
NMB	7.53123	2.00558	-1.90833	2.64181e-19	2.69905e-18
HEPH	24.9385	6.67763	-1.89266	2.71208e-19	2.76796e-18
CCL18	45.6849	117.004	1.36856	2.96804e-19	3.02762e-18
CRAT	26.2552	7.09749	-1.88814	3.26096e-19	3.31263e-18
HLA-DRB1	256.482	656.286	1.36472	3.5779e-19	3.62521e-18
CYP2W1	14.1586	3.87009	-1.89054	4.10877e-19	4.15666e-18
PTAFR	6.91499	17.6436	1.35954	5.57245e-19	5.59126e-18
CD2	11.3931	28.9062	1.35976	5.92235e-19	5.93021e-18
MAPK8IP1	4.30793	1.17495	-1.87329	6.77219e-19	6.7536e-18
C1orf233	7.20454	1.96429	-1.86809	8.8713e-19	8.78886e-18
ACKR4	5.02742	12.7662	1.3527	1.04289e-18	1.02956e-17
SPINK5	25.1709	6.77027	-1.85231	1.1772e-18	1.15865e-17
IL2RA	2.49079	6.30949	1.34898	1.43774e-18	1.40872e-17
PI3	266.156	72.9851	-1.84599	1.48199e-18	1.44992e-17
RBP1	23.4614	6.46166	-1.84898	1.48676e-18	1.45313e-17
SLC9A7	3.61825	9.14422	1.34264	1.65679e-18	1.61289e-17
KHDRBS3	4.81257	1.32106	-1.85313	1.71768e-18	1.66885e-17
TMEM253	6.62795	1.829	-1.85049	1.74e-18	1.6897e-17
CES1	18.2138	5.16163	-1.83895	1.88333e-18	1.82437e-17
ME1	9.9122	2.77807	-1.83426	2.28404e-18	2.20057e-17
FAM3D	58.7921	16.324	-1.82502	3.22291e-18	3.07792e-17
SSTR1	5.5605	1.58349	-1.8119	5.17724e-18	4.918e-17
EIF4EBP3	10.5776	2.97613	-1.82306	5.7041e-18	5.41062e-17
IL18BP	16.066	39.8866	1.32339	6.16062e-18	5.83237e-17
TARP	2.55919	6.36688	1.33653	8.40424e-18	7.92585e-17
PHGDH	21.25	6.22382	-1.7964	8.9613e-18	8.44307e-17
SYBU	9.65067	2.76688	-1.79652	9.19334e-18	8.65754e-17
SEMA6A	6.2274	1.78953	-1.79326	9.6506e-18	9.08379e-17
PRIMA1	4.03549	1.13324	-1.80248	9.94225e-18	9.34038e-17
TMEM74B	4.03895	1.15332	-1.80629	1.11222e-17	1.04339e-16
HBA2	105.879	30.5105	-1.78916	1.15699e-17	1.08332e-16
PDK4	35.6308	10.2618	-1.7878	1.17051e-17	1.09545e-16
SYT13	11.9166	29.2944	1.30919	1.39567e-17	1.29998e-16
KBTBD11	4.10912	1.19602	-1.78371	1.4002e-17	1.30358e-16
C6orf141	1.81461	4.52381	1.32109	1.48283e-17	1.37985e-16
KLK7	11.1499	3.33367	-1.77989	1.48372e-17	1.38002e-16
PDZRN3	11.1143	3.22363	-1.78136	1.51109e-17	1.40215e-16
TGM2	96.7457	237.651	1.30617	1.64507e-17	1.52287e-16
RNF39	4.51821	1.30702	-1.78942	1.71007e-17	1.5823e-16
SAMHD1	30.7512	75.4185	1.30368	1.96322e-17	1.81141e-16
HLA-DMB	42.2503	103.602	1.30378	1.99538e-17	1.84022e-16
MUC17	36.0325	10.4976	-1.77116	2.01404e-17	1.85568e-16
LAP3	59.5025	145.611	1.30298	2.04382e-17	1.88224e-16
AIF1L	5.04987	1.45636	-1.77697	2.17157e-17	1.99801e-16
VIPR1	6.28063	1.84517	-1.77191	2.31245e-17	2.12364e-16
DNAJA4	17.9029	5.29103	-1.76427	2.7067e-17	2.47874e-16
ZAP70	2.54449	6.24959	1.30435	2.85393e-17	2.60992e-16
CAP2	6.38141	1.85208	-1.76584	2.92644e-17	2.67498e-16
UNC5CL	10.9823	27.009	1.29786	2.96764e-17	2.71137e-16
PTPRN2	11.1245	3.28957	-1.76219	3.05499e-17	2.78989e-16
FYB	9.04787	22.0521	1.29508	3.51575e-17	3.20023e-16
ITGAL	5.94218	14.4899	1.29534	3.52189e-17	3.20365e-16
FAS	8.33223	20.1863	1.29539	3.64286e-17	3.3052e-16
GOLGA8A	9.27642	2.7452	-1.75294	3.96495e-17	3.58583e-16
SLC16A2	6.79316	2.01218	-1.7546	3.98189e-17	3.59949e-16
MUC5AC	100.812	29.7681	-1.74689	4.70432e-17	4.24666e-16
SLC44A4	107.919	31.9763	-1.7471	4.74492e-17	4.28134e-16
C4orf48	21.4568	6.34355	-1.75615	5.28406e-17	4.75033e-16
RERG	6.49578	1.92091	-1.74732	5.5088e-17	4.94783e-16
SNTA1	7.46134	2.22134	-1.74343	6.04445e-17	5.42149e-16
HLA-DPB1	43.3596	104.934	1.28468	6.42412e-17	5.75151e-16
ANGPTL4	7.39861	2.20672	-1.74217	6.54272e-17	5.84968e-16
PLRG1	11.6024	28.9363	1.28496	6.55665e-17	5.85946e-16
SRPX	7.99626	2.38196	-1.74236	6.90497e-17	6.15952e-16
PLA2G7	8.24208	19.9938	1.28513	7.17002e-17	6.38724e-16
CCL14	22.6804	6.67385	-1.74031	8.39388e-17	7.45718e-16
NOL3	8.74869	2.60321	-1.73879	8.67564e-17	7.69703e-16
GCNT3	55.7985	16.7847	-1.72853	8.99726e-17	7.96436e-16
CXCR3	3.99424	9.63904	1.28576	9.23686e-17	8.1654e-16
FDXR	8.0405	19.311	1.28044	9.75784e-17	8.61043e-16
NFAM1	1.86384	4.50588	1.27889	1.13046e-16	9.93064e-16
FAM174B	7.99299	2.40831	-1.72281	1.21978e-16	1.07009e-15
MLF1	4.47294	1.33579	-1.71614	1.47663e-16	1.2885e-15
APOBEC3G	8.94883	21.5041	1.27217	1.61504e-16	1.4074e-15
CSF2RB	5.85055	13.9869	1.27061	1.6594e-16	1.44477e-15
CD96	3.00891	7.21755	1.27199	1.69296e-16	1.47334e-15
CEACAM5	336.41	101.174	-1.70905	1.74204e-16	1.51337e-15
MT1L	4.08089	1.18279	-1.79842	1.74513e-16	1.51538e-15
CAMK2N1	63.3386	19.3359	-1.70804	1.84962e-16	1.60541e-15
INHBB	5.10994	1.5741	-1.7044	2.56598e-16	2.21347e-15
HAS3	3.59842	8.53344	1.26296	3.10683e-16	2.67179e-15
RARRES3	99.9226	236.149	1.25605	3.79938e-16	3.25169e-15
CLRN3	18.8402	5.80347	-1.68643	4.37547e-16	3.73984e-15
OLFM1	5.4731	1.69048	-1.68664	4.43658e-16	3.78876e-15
DDB2	11.1678	26.4348	1.25474	4.47293e-16	3.81814e-15
CDHR5	38.2808	12.0089	-1.68026	4.77349e-16	4.07117e-15
KCNK6	11.4141	3.55929	-1.68173	4.89263e-16	4.16915e-15
SLC39A5	16.3915	5.09349	-1.68069	5.40251e-16	4.59167e-15
FAH	6.86772	2.13972	-1.68442	5.48277e-16	4.65786e-15
COCH	4.34526	1.35218	-1.67895	6.70283e-16	5.65274e-15
WNT10A	4.94596	1.55345	-1.6812	7.35339e-16	6.19073e-15
LDHD	6.36951	1.99275	-1.66973	8.51338e-16	7.14891e-15
TRIM22	18.6927	43.8959	1.24233	8.63287e-16	7.23994e-15
OGN	19.4477	6.14792	-1.65985	9.80485e-16	8.20179e-15
GDPD3	7.53359	2.35694	-1.66904	9.87515e-16	8.25707e-15
C9orf116	3.2331	7.66139	1.2572	1.06953e-15	8.91623e-15
MRGPRF	15.653	4.93595	-1.65403	1.21738e-15	1.01016e-14
FBXO44	4.44343	1.40896	-1.656	1.32946e-15	1.1013e-14
SPON1	21.9674	7.0167	-1.64753	1.43586e-15	1.18843e-14
TPBG	9.4285	3.01099	-1.64645	1.63228e-15	1.34873e-14
IL4I1	5.86454	13.717	1.2344	1.66752e-15	1.37727e-14
STAT1	94.6608	221.302	1.22987	1.73276e-15	1.43055e-14
TSPAN2	6.69071	2.12478	-1.64303	1.85097e-15	1.52685e-14
MTURN	5.93306	1.91802	-1.63579	2.2043e-15	1.81222e-14
ZNF480	5.57525	1.79017	-1.63362	2.43143e-15	1.99477e-14
LARP6	6.77162	2.1668	-1.64024	2.46649e-15	2.02269e-14
CCL15-CCL14	4.10391	9.49705	1.23015	2.54383e-15	2.0835e-14
NR0B2	11.2665	3.63872	-1.64011	2.65088e-15	2.16846e-14
ARL14	17.4678	5.64293	-1.63163	2.65428e-15	2.17034e-14
C2CD4B	8.88357	2.82519	-1.64276	2.67969e-15	2.1902e-14
TNFSF13B	6.43992	14.931	1.22291	2.98176e-15	2.43304e-14
PPP1R14A	13.3016	4.23748	-1.63505	3.04727e-15	2.48339e-14
CAV2	24.0073	7.74675	-1.62481	3.14129e-15	2.55789e-14
HABP2	11.3007	26.2489	1.2191	3.41546e-15	2.77423e-14
HOXA5	4.69304	1.50907	-1.63012	3.61932e-15	2.93496e-14
APOE	167.841	384.7	1.21677	3.73919e-15	3.03091e-14
MEIS3P1	4.71989	1.53132	-1.62195	3.94596e-15	3.19191e-14
RNF208	6.52509	2.08842	-1.63471	4.03406e-15	3.26049e-14
SYNE2	29.3301	67.9401	1.21127	5.11529e-15	4.10899e-14
GNLY	10.1538	23.2871	1.21661	5.25019e-15	4.21562e-14
DUSP23	37.3819	12.1812	-1.61117	5.39934e-15	4.33006e-14
CCL15	10.465	23.8878	1.21229	5.88306e-15	4.71029e-14
IL27RA	5.52958	12.7473	1.21016	6.36538e-15	5.09023e-14
HOXC4	4.25137	9.7704	1.21335	6.49192e-15	5.18719e-14
SIGLEC1	2.8098	6.45079	1.20791	6.82324e-15	5.43863e-14
FMO5	9.2576	3.05769	-1.60188	6.83239e-15	5.44371e-14
B3GALNT1	4.06058	1.34731	-1.60315	7.27151e-15	5.77715e-14
MALL	47.9021	15.7728	-1.59774	7.54582e-15	5.99024e-14
LEMD1	1.74713	4.07023	1.23446	7.61322e-15	6.0413e-14
BCAS4	6.21241	2.0414	-1.60685	8.29155e-15	6.56364e-14
POLD1	9.31435	21.2759	1.20183	9.28881e-15	7.33532e-14
CTSF	12.7996	4.2267	-1.59262	9.78445e-15	7.7143e-14
PVRL1	17.2466	39.3309	1.19849	1.07773e-14	8.48348e-14
PTK6	17.0285	5.64966	-1.58441	1.24929e-14	9.82209e-14
MYL9	491.401	162.048	-1.58132	1.28914e-14	1.01273e-13
MANEAL	8.70067	19.8378	1.19521	1.38313e-14	1.08439e-13
SLC19A3	4.08594	9.36934	1.19504	1.44718e-14	1.13234e-13
PPP1R12B	35.5512	11.7848	-1.57631	1.52041e-14	1.18917e-13
DZIP1L	1.98687	4.52488	1.19648	1.59178e-14	1.24301e-13
CD3D	11.6073	26.2708	1.19686	1.60307e-14	1.25083e-13
PTPN22	2.74482	6.25617	1.19482	1.60969e-14	1.25549e-13
CSTA	51.3579	16.839	-1.57755	1.63387e-14	1.27385e-13
RASD1	6.90962	2.31637	-1.58044	1.64719e-14	1.28219e-13
SPN	2.37363	5.38844	1.19149	1.80081e-14	1.39844e-13
TNFRSF6B	41.4901	13.9452	-1.57335	1.86683e-14	1.44571e-13
LDLRAD3	4.40804	1.47323	-1.57443	1.8704e-14	1.4479e-13
LINC01296	11.6787	3.94794	-1.57173	1.8853e-14	1.45886e-13
MOGAT3	4.30577	1.42572	-1.58012	1.92036e-14	1.48481e-13
STMN3	11.726	3.93564	-1.56969	2.10522e-14	1.62391e-13
HIST1H1E	4.10223	9.30424	1.20062	2.10764e-14	1.62513e-13
ETV7	9.84624	22.2973	1.18823	2.16175e-14	1.66555e-13
UBE2L6	69.1512	156.122	1.18611	2.17299e-14	1.67355e-13
APOL3	13.5328	30.5554	1.18637	2.24221e-14	1.72483e-13
PIK3C2G	3.25349	7.36245	1.18675	2.31424e-14	1.77954e-13
ADM	11.0162	3.71089	-1.56706	2.43587e-14	1.86722e-13
TOR4A	22.5505	7.63526	-1.56242	2.46516e-14	1.88819e-13
DNALI1	4.75969	1.59637	-1.56632	2.53047e-14	1.93595e-13
COL7A1	4.77803	1.61916	-1.55967	2.77998e-14	2.12104e-13
PODXL2	22.2759	7.54489	-1.55599	2.91992e-14	2.22609e-13
CD8B	4.42636	10.0136	1.18815	2.98178e-14	2.27236e-13
TMOD1	5.33818	1.80347	-1.55574	3.37266e-14	2.5603e-13
CCL4	19.0206	42.662	1.17845	3.93816e-14	2.98266e-13
TPPP3	42.1552	14.4326	-1.54931	3.98995e-14	3.02072e-13
CHRM3	5.19164	1.77529	-1.55138	4.04893e-14	3.06419e-13
P2RY13	1.98086	4.45776	1.18068	4.35641e-14	3.29308e-13
CTSC	84.2211	188.57	1.17301	4.41194e-14	3.33377e-13
TAP1	87.6116	196.266	1.17223	4.59186e-14	3.46439e-13
A4GNT	3.67731	8.28267	1.1781	4.66315e-14	3.51411e-13
[truncated: 1,295 more rows]

## Sheet: H
Table S5H. Genes involved in Type I and Type II interferon activity.
[truncated: 86 more rows]

[truncated: 2 more sheets: I, J-part1]
