# Supplementary material for: Integrated Pan-Cancer Map of EBV-Associated Neoplasms Reveals Functional Host–Virus Interactions
Source: Oxford University Press journal article supplement (doi:10.1158/0008-5472.can-19-0615), 2019-09-03
Supplement: 00085472can190615-sup-217692_3_supp_5732043_pwpnf5.xlsx [file 00085472can190615-sup-217692_3_supp_5732043_pwpnf5.xlsx]

## Sheet: J-part2
Table S5J (part2, expression values (transcripts per million; T.P.M.) of all genes (rows) in each sample (columns).
Gene	TCGA-CG-4436	TCGA-CG-4437	TCGA-CG-4438	TCGA-CG-4440	TCGA-CG-4441	TCGA-CG-4442	TCGA-CG-4443	TCGA-CG-4444	TCGA-CG-4460	TCGA-CG-4462	TCGA-CG-4465	TCGA-CG-4466	TCGA-CG-4469	TCGA-CG-4475	TCGA-CG-4476	TCGA-CG-4477	TCGA-CG-5716	TCGA-CG-5717	TCGA-CG-5718	TCGA-CG-5719	TCGA-CG-5720	TCGA-CG-5721	TCGA-CG-5722	TCGA-CG-5723	TCGA-CG-5724	TCGA-CG-5725	TCGA-CG-5726	TCGA-CG-5728	TCGA-CG-5730	TCGA-CG-5732	TCGA-CG-5733	TCGA-CG-5734	TCGA-D7-5577	TCGA-D7-5578	TCGA-D7-6519	TCGA-D7-6520	TCGA-D7-6521	TCGA-D7-6522	TCGA-D7-6524	TCGA-D7-6525	TCGA-D7-6526	TCGA-D7-6527	TCGA-D7-6528	TCGA-D7-6815	TCGA-D7-6818	TCGA-D7-6822	TCGA-D7-8570	TCGA-D7-8572	TCGA-D7-8573
A1BG	0.24	2.24	0.47	0.31	1.22	0.18	0.48	0.64	3.73	2.29	0.48	0.25	0.49	0.6	1	0.94	2.6	1.78	9.21	2.35	1.03	1.45	5.02	1.19	0.95	2.11	0.59	5.24	3.99	3.28	5.27	3.42	1.33	3.06	0.43	0.62	2.18	4.24	3.63	0.42	0.79	3.82	0.35	1.33	1.11	0.42	1.76	2.04	0.28
A1BG-AS1	0.16	0.91	0.45	0.16	0.23	0.16	0.31	0.78	4.05	1.82	0.33	0.43	0.31	0.57	0.94	0.5	0.56	0.51	4.05	0.65	0.29	0.56	0.62	0	0.23	0.48	0.1	1.14	1.07	1.26	1.2	1.06	0.35	0.77	0.17	0.34	0.66	1.92	1.22	0	0.13	0.29	0	0.34	0.27	0.18	1.68	1.43	0.13
A1CF	8.93	0.02	16.52	29.82	7.88	0.03	0.05	71.2	0.4	0.8	11.84	6.98	9.68	0.15	2.14	0.8	0.85	0.05	3.5	1.76	9.39	0.04	0.09	0.18	0.04	0.01	2.6	0.42	27.06	2.62	0.35	5.73	2.86	9.29	0.45	0.53	4.86	3.58	4.41	0.76	3.09	0.18	10.88	11.59	22.5	0.93	0.75	17.29	0.75
A2M	98.02	215.03	322.13	134.88	229.38	82.61	237.83	474	422.99	1864.94	354.92	97.16	215.03	558.79	944.63	395.6	284.5	477.42	269.97	672.36	414.79	222.28	299.19	135.72	78.84	165.77	79.83	226.55	274.65	189.7	253.53	230.88	240.94	453.34	180.56	488.42	565.7	913.03	1191.51	335.74	223.2	386.82	76.7	212.19	509.51	299.58	505.98	416.46	93.29
A2M-AS1	0.31	0.18	0.79	0.32	0.95	0.48	7.36	0.39	3.51	2.09	0.42	0.34	0.87	1.32	2.07	1.77	0.28	0.76	0.3	2.23	0.51	0.48	1.23	0.87	0.66	0.53	0.17	0.35	0.87	0.41	0.62	0.35	0.22	0.64	0.66	2.38	0.83	1.26	1.94	0.47	0.31	0.66	0.38	1.94	0.81	0.75	0.56	1.91	0.18
A2ML1	0.03	0.02	0.12	0.05	0.01	0.22	0.68	0.03	0.66	0.06	0	0.22	0.11	0.14	0.06	92.87	0.02	1171.91	0.03	1.08	0	0.02	17.26	0	18	2.67	0.02	0.06	0	0.03	0.04	0.02	0	0.14	0.3	0.01	0	0	1.61	26.19	0.05	0.02	0	0.11	0.02	0.06	0.02	0.22	7.13
A2MP1	0	0.14	0	0.04	0.05	0	0	0.1	0	0.22	0	0.06	0.21	0.05	0.3	0.06	0	0	0.11	0.07	0.09	0	0	0	0.23	0.07	0	0	0	0	0.13	0	0.07	0	0.06	0	0.05	0.06	0.11	0	0.05	0	0	0	0.08	0	0	0.05	0.05
A3GALT2	0.06	0	0	0	0	0	0	0	0	0.13	0	0	0	0	0	0.21	0	0	0	0	0.05	0	0	0	0	0	0	0	0	0	0	0	0	0.12	0	0	0	0	0	0	0	0	0.07	0	0	0.07	0	0.25	0
A4GALT	2.08	10.63	6.85	14.71	18.74	1.87	4.2	10.21	6.72	33.71	3.11	4.78	2.75	19.93	11.24	10.33	8.07	21.17	10.32	29.51	14.37	11.65	9.8	21.52	32.74	11.3	2.72	14.65	6.39	8.65	11.35	17.55	22.05	16.96	31.87	31.99	23.01	49.51	37.29	23.88	13.14	14.02	9.13	8.49	35.97	48.12	13.36	26.93	2.68
A4GNT	2.19	5.63	0	0.06	47.83	0.07	0.09	0.13	15.49	5.83	0.36	1.86	0.13	0.12	9.06	5.09	6.17	20.43	1.79	47.03	0	0	7.86	0	0	0	0.42	20.89	1.06	47.87	61.06	8.29	7.47	0.23	0.04	0.79	103.75	0.08	5.85	0	0.17	48.14	0	1.64	0.25	0.11	15.33	0.13	1.77
AA06	0	0	0	0	0	0	0	0	0	0	0	0	0	0	0	0	0	0	0	0	0	0	0	0	0	0	0	0	0	0	0	0	0	0	0	0	0	0	0	0	0	0.1	0	0	0	0	0	0	0
AAAS	37.39	83.01	53.8	73.62	60.22	45.58	77.76	44.97	53.36	43.11	54.35	61.25	41.95	37.44	35.51	33.31	44.32	33.4	70.67	45.06	88.28	53.71	68.98	44.05	73.16	75.6	94.43	40.32	33.01	43.82	44.59	40.93	45.49	86.13	38.8	51.69	40.78	59.59	48.19	56.54	130.33	63.72	63.07	53.73	61.76	49.96	41.4	70.42	66.81
AACS	25.31	15.45	21.78	39.95	43.45	25.04	29.39	13.85	34.35	16.2	18.32	27.55	17.21	20.22	22.34	18.62	36.4	50.08	49.84	32.34	32.78	29.02	30.65	22.82	21.13	19.3	27.53	16.77	11.55	34.86	20.8	18.96	21.88	22.18	21.3	17.65	41.57	14.62	27.63	21.11	31.68	62.96	44.3	59.41	57.56	33.87	22.57	29.77	52.63
AACSP1	0.02	0	2	2.14	0.28	0.06	0.07	0.03	2.77	0.06	0	0.19	0.16	0	0.77	0.18	0.04	0.05	0	0.04	0.02	1.64	0.63	0	0.05	0.91	3.7	0	0	0.27	0	0	0	0	0	0.11	0.05	0	0	0.05	3.1	0	0	0.04	0	0	0.02	4.81	0.18
AADAC	2.4	4.01	2.16	41.12	18.26	1.31	1.49	2.28	15.88	19.54	1.78	1.12	18.69	1.88	36.25	7.36	96.91	1.65	7.51	10.06	13.7	0.35	6.64	0.19	0.82	0.19	1.49	31.95	162.41	7.95	41.56	8.78	77.83	5.57	6.41	0.66	106.69	3.8	26.85	6.84	7.22	3.59	1.52	6.44	0.21	1.26	46.4	2.7	2.03
AADACL2	0	0	0	0	0	0	0	0	0	0.04	0	0	0.04	0	0	0.09	0	0.36	0	0	0	0	0	0	0.04	0	0	0	0	0	0	0	0	0	0	0.04	0	1.18	0	0	0	0	0.09	0	0	0.08	0	0	0
AADACL2-AS1	0	0.13	0.41	0.25	0.44	0.32	0.4	0.29	0	0.1	0	0.45	0.3	0	0	0.11	0.14	0.66	0.75	0.26	0.25	0.47	0.31	0	0.34	1.71	0	0	0.53	0.22	0	0.17	0.17	0.09	0.32	2.01	0.18	0.31	0.5	0.49	2.07	2.43	0.22	0.82	0.28	0.92	0.55	3.79	0.75
AADACL3	0.01	0	0	0	0	0	0.02	0	0	0	0	0	0	0	0	0.03	0	0	0	0	0	0	0	0	0.04	0	0	0	0	0	0	0	0	0	0	0	0	0	0	0.03	0	0	0.02	0	0	0	0	0.06	0.03
AADACL4	0	0	0.08	0	0	0	0.05	0	0	0	0	0	0	0	0.04	0	0	0	0	0	0	0	0	0	0	0	0	0	0	0	0	0	0	0	0	0	0	0	0.04	0	0	0	0.04	0	0	0	0	0.19	0.04
AADACP1	1.48	0.38	0.64	6.65	10.95	7.55	8.99	1.32	0.48	10.85	0.16	2.55	17.27	0.25	3.78	6.51	0.51	1.91	0.15	5.13	9.07	0	2.22	0.44	1.17	0.07	4.22	0.19	15.84	0.96	0.42	0.86	6.88	0.75	0.61	6.53	2.77	0.56	9.78	20.15	10.11	2.24	17.46	1.83	0.5	1.57	0.54	0.37	0.45
AADAT	3.13	1.41	7.88	9.76	1.65	12.71	3.2	0.9	10.13	6.76	5.5	8.17	10.97	3.65	4.03	3.62	5.56	2.25	2.95	2.03	0.38	14.71	2.17	19.91	2.33	2.18	0.46	1.65	0.72	1.37	2.89	0.87	5.33	4.33	10.43	9.83	2.88	1.63	1.75	5.11	5.76	3.69	0.51	2.56	3.14	4.74	6.15	17	3.35
AAED1	24.19	21.04	14.55	29.78	10.22	13.71	8.03	23.36	17.45	35.13	14.64	16.13	16.7	23.24	24.93	58.69	8	10.82	25.23	17.98	14.58	19.11	14.15	17.06	12.54	25.46	3.58	5.24	11.14	13.54	10.24	8.14	12.19	9.35	14.33	11.49	16.07	16.79	27.98	23.4	14.43	11.26	19.55	13.02	44.71	17.55	26.56	30.85	15.38
AAGAB	33.36	27.88	60.89	41.66	31.38	49.06	48.17	38.44	82.89	31.93	45.04	45.05	38.8	40.72	60.9	65.71	44.68	29.22	17.57	33.57	35.08	29.75	27.46	37.8	23.52	57.55	30.97	18.78	17.94	24.31	20.85	19.9	27.9	24.59	19	46.62	29.57	22.59	35.2	58.41	41.73	35.62	48.74	56.46	25.42	73.9	29.97	45.79	41.37
AAK1	3.73	2.94	7.34	6.02	4.3	4.5	6.37	6.82	12.44	11.71	7.37	6.1	6.62	11.81	10.1	8.43	7.08	7.39	8.83	5.05	3.85	6.11	3.21	2.84	4.51	5.86	3.28	5.68	4.63	4.52	4.78	4.34	3.72	4.22	4.44	4.88	6.37	6.05	7.2	4.65	5.23	3.91	7.12	7.34	7.02	7.35	7.2	8.89	4.09
AAMDC	21.9	22.44	17.86	18.74	7.86	27.75	66.1	50.89	46.68	31.69	25.06	18.44	24.66	31.57	46.23	34.17	8.35	12.52	21.56	27.58	24.02	29.37	36.04	20.54	74.22	41.27	18.71	30.88	45.71	16.82	62.67	28.52	29.81	23.01	43.24	22.78	17	28.12	27.7	25.01	8.54	63.54	42.63	20.06	24.5	26.6	26.51	23.52	11.56
AAMP	79.7	148.57	88.38	122.73	116.72	61.89	184.42	99.34	99.98	63.43	71.06	37.63	62.74	54.82	60.94	86.12	145.13	105.88	268.03	120.52	161.84	159.68	116.21	131.69	128.7	192.07	240.05	104.51	74.33	153.37	126.54	111.38	148.22	130.89	165.81	164.29	110.32	115.33	118.12	183.64	110.65	158.1	99.22	101.45	90.75	103.48	88.87	112.06	127.32
AANAT	0.03	0.76	0.06	0.1	0.22	0.13	0.08	0.03	0.06	0.25	0.19	0.14	0	0.05	0.06	0.13	0.28	0.17	0.03	0.16	0.05	0.58	0.17	0.05	0.23	0.32	0.19	0.13	0.17	0.24	0.08	0.22	0.23	0.44	0.89	0.18	0.26	0.72	0.13	0.66	0.18	0	0.03	0.09	0	0.18	0.06	0.24	0.17
AAR2	55.62	51.89	65.18	54.39	58.98	24.94	45.65	53.55	38.86	34.74	27.12	52.06	38.94	41.94	30.96	31.37	38.19	29.75	44.05	51.98	46.34	47.73	41.12	29.24	50.31	55.44	67.02	23.13	23.75	53.32	28.83	27.64	42.48	74.96	57.66	100.82	54.34	41.47	45.76	50.63	76.96	53.71	92.08	67.42	57.92	90.26	55.85	64.53	63.59
AARD	0.09	0.3	1.17	0.06	0.45	0.62	1.73	0.61	0.32	0.52	0.05	1.15	0.25	0.91	0.69	0.84	0.05	0.39	0.1	1.25	0.33	0.23	0.47	0.3	0.21	2.93	0.27	0.94	0.19	0.2	0.71	0.36	0.08	0.64	0	0.44	0.35	0.93	0.9	0.06	0.2	0.49	0.07	0.19	0.83	0.14	0.24	1.46	0.76
AARS	81.77	83.47	120.84	105.62	88.78	112.29	168.48	83.15	162.59	100.89	73.78	117.24	71.33	113.19	72.39	56.14	107.36	62.2	83.07	110.83	77.36	112.99	176.61	61.48	64.11	99.55	81.11	62.29	34.58	99.14	70.18	44.5	58.77	104.56	60.17	96.08	118.29	77	73.6	180.66	81.81	81.25	118.71	137.09	90.45	145.35	73.71	84.67	81.06
AARS2	9.33	8.75	9.7	10.46	14.93	9.72	11.16	9.99	10.18	7.96	8.17	11.87	8.16	10.44	7.33	7.04	10.15	11.25	32.31	7.09	15.89	6.71	7.82	4.73	6.7	13.65	12.35	5.67	4.86	10.5	5.82	5.65	7.48	12.6	3.6	7.98	7.89	9.21	9.26	12.34	10.91	15.57	50.62	21.61	11.64	22.6	14.86	13.54	12.58
AARSD1	59.58	24.77	33.56	45.98	25.39	33.74	49.46	18.1	29.24	24.67	26.31	53.9	29.64	35.03	21.59	22.24	23.82	16.85	19.18	31.58	25.45	20.3	35.98	21	37.07	25.48	31.93	14.58	13.6	14.73	19.12	15.27	22.38	29.59	33.33	27.07	24.16	22.71	27.06	37.15	19.51	39.25	23.07	33.23	20.86	18.97	17.56	23.6	38.28
AASDH	6.39	2.41	7.21	8.42	5.27	9.5	13.86	12.03	8.74	10.53	7.69	10.76	13.02	5.16	9.02	11.66	5.3	6.41	3.51	3.05	4.7	5.33	5.68	3.43	4.12	5.65	4.93	3.19	2.67	4.45	3.21	2.25	4.24	5.26	3.43	5.12	3.76	3.27	7.19	7.24	8.73	4.33	3.03	4.82	3.64	10.58	7.24	8.28	6.13
AASDHPPT	42.95	9.08	38.32	50.78	25.2	43.23	24.53	35.24	39.03	34.19	38.42	47.7	37.7	37.18	31.25	50.94	19.01	26.77	13.46	13	16.03	19.76	23.6	25.18	14.04	42.12	20.94	13.04	8.01	17.49	14.15	10.31	19.04	13.35	33.33	26.45	18.95	14.33	25.15	42.18	53.02	17.44	48.55	22.46	18.9	48.97	30.03	36.54	41.45
AASS	0.42	1.46	2.76	6.16	3.47	13.13	4.6	2.4	7.51	8.42	1.4	8.15	2.54	5.76	11.58	5.78	1.7	6.27	1.28	3.33	1.16	1.85	2.25	4.64	1.35	1.9	1.03	3	2.18	1.4	2.06	2.22	0.49	1.92	1.7	1.48	2.58	2.36	4.18	3.85	2.63	1.81	1.3	3.39	1.84	2.1	1.85	7.85	1.64
AATBC	0.71	0.43	0.49	0.09	1.75	1.3	0.16	0.26	0.35	0.61	0.1	0.11	1.28	0.14	0.41	0.07	0.5	1.62	5.6	0.45	0.53	0.4	1.33	0.34	0.18	0.26	0.19	0.41	0.18	0.52	0.8	0.11	0.09	0.65	0.89	1.39	1.02	0.19	0.92	0.25	0.28	0.09	0.52	0.62	0.41	0.91	0.5	0.26	0.26
AATF	86.2	83.4	71.68	107.14	59.15	53.33	68.14	60.29	72.89	48.04	60.79	60.51	68.1	64.77	47.69	69.84	68.27	47.82	92.47	97.72	80.05	83.24	73.7	49.03	147.74	65.84	92.41	42.21	28.32	56.73	40.85	39.39	87.28	71.48	82.02	101.44	77.26	62.04	78.1	109.86	141.74	104.9	145.5	324.18	70.26	57.14	68	53.31	237.95
AATK	1.47	3.39	0.8	1.03	9.86	18.25	21.06	6.22	10.03	10.6	12.68	0.49	13.31	1.16	10.14	3.1	6.49	1.07	2.73	11.9	22.62	0.94	23.46	1.62	1.95	12.8	21.01	2.98	14.92	28.91	2.42	3.94	4.15	5.19	5.2	16.78	3.75	9.55	18.19	1.31	0.91	5.06	0.65	11.07	2.48	2.92	9.86	19.61	38.71
AATK-AS1	0	0	0	0	0	0	0	0	0.11	0	0	0.04	0	0	0	0	0	0	0	0	0	0	0	0	0.1	0	0	0	0	0	0	0	0	0	0	0	0	0	0	0.04	0.04	0	0	0	0	0.08	0.04	0	0
ABAT	5.94	6.9	2.68	0.91	1.34	3.26	13.33	4.08	17.61	13.48	6.84	0.69	3.92	4.73	88.34	7.83	5.23	17.29	16.43	9.5	8.42	3.47	4.77	2.57	0.47	0.53	2.97	4.91	46.56	25.11	7.23	10.9	10.38	8.95	4.37	6.71	10.76	7.61	6.98	13.83	2.87	15.03	1.99	33.82	15.49	2.03	7.15	38.52	40.78
ABCA1	7.06	7.15	18.31	10.7	7.89	5.92	18.02	12.36	8.07	48.97	21.77	4.03	27.42	21.14	24.75	19.89	5.12	5.76	9.27	5.74	5.61	14.24	5.42	5.95	5.49	11.93	1.57	4.33	2.1	5.41	4.12	7.34	12.43	6.82	5.94	8.27	11.38	11.34	14.93	9.2	3.29	5.09	4.93	13.26	15.45	16.95	11.4	24.13	2.68
ABCA10	0.1	0.1	0.35	0.82	0.4	1.25	0.75	0.79	0.61	4.05	0.42	0.57	0.51	0.49	2.17	0.65	0.55	0.62	0.25	0.38	0.54	0.44	0.17	1.62	0.21	0.1	0.12	0.15	0.46	1.07	0.07	0.45	0.17	0.27	0.63	0.25	0.24	0.25	0.73	0.1	0.24	0.16	0.35	0.5	0.16	0.66	0.23	0.46	0.1
ABCA11P	5.95	1.58	7.34	3.5	8.62	4.72	14.91	4.85	8.17	7.13	6.99	5.65	3.4	10.05	8.45	6.7	3.85	4.08	6.15	5.18	4.76	4.59	6.56	3.65	5.6	3.98	0.33	3.2	3.81	7.92	3.78	3.09	4.28	7.49	3.45	7.57	4.41	4.38	4.1	7.78	4.78	4.81	4.21	10.25	2.92	16.14	3.6	2.75	3.81
ABCA12	0.05	1.58	0.12	0.32	19.52	1.59	0.84	0.03	1.17	0.06	1.19	0.71	0.17	8.05	0.01	1.06	1.41	1.71	0.48	1.87	0.03	1.3	7.82	1.98	0.03	0.03	0.58	0.4	0	2.83	0.35	0.44	1.24	0.08	0.49	0.71	0.01	0.02	5.41	0.28	0.02	0.06	0.01	0.08	0.03	0.15	0.43	0.84	5
ABCA13	0.28	0.04	0.21	0.04	0.11	0.13	0.12	0.05	0.03	0.66	0.13	1.14	2.26	1.86	2.88	0.5	0.14	0.22	0.04	0.77	0.14	0.02	0.17	0.02	0.05	0.06	0.07	0.04	0.14	0.2	0.01	0.08	0.01	0.24	0.63	0.25	1.46	0.04	0.68	0.69	0.18	0.23	0.05	0.76	0.01	0.05	0.02	0.35	0.12
ABCA17P	0.01	0	0.03	0.01	0.01	0.04	0.09	0.05	0.01	0.04	0.01	0.15	0.03	0.05	0.03	0.38	0.02	0.03	0.03	0.06	0.05	0.06	1.14	0	0.04	0.25	0.03	0	0	0.04	0	0	0.16	0.04	0.1	0.41	0.02	0.03	0	0.05	0.04	0	0.12	0.04	0.06	0.1	0.02	0.08	0.06
ABCA2	7.05	16.92	8.74	27.29	25.79	21.96	46.88	16.3	14.2	17.48	8.57	25.34	10.69	16.69	15.23	10.66	10.02	6.68	56.61	17.34	4.98	23.76	8.79	8.72	10.92	43.54	12.34	14	7.9	19.65	10.05	10.01	6.04	10.89	11.46	23.66	17.22	16.75	15.49	14.95	23.28	14.71	23.48	10.49	78.49	29.97	23.68	21.03	9.95
ABCA3	1.56	2.44	1.41	5.25	9.93	0.48	2.22	3.68	19.53	4.32	0.56	0.42	8.11	6.29	3.11	3.87	5.97	3.8	1.37	11.43	3.22	23.28	20.56	3.97	20.95	28.71	2.29	3.94	2.23	2.12	3.31	1.8	1.68	2.42	8.63	3.61	7.32	7.38	4.34	2.14	1.97	3.12	1.23	3.69	59.04	14.04	1.67	3.05	0.37
ABCA4	0.03	0.07	0.11	0.03	0.02	0.35	0.11	5.72	0.11	0.32	0.02	0.07	0.02	0.06	0.03	0.05	0.05	0.14	0.08	0.15	0.05	0.04	0.11	0.01	0.06	0.15	0.05	0.03	2.14	0.03	0.07	0.06	0.02	0.13	0.31	0.02	0.09	0.22	0.11	0.08	0.02	0.05	0.02	0	0.3	0.1	0.02	0.13	0.03
ABCA5	3.03	0.58	3.22	2.02	3.82	2.13	14.6	6.52	3.97	4.18	2.74	4.56	2.8	2.44	5.76	6.24	2.45	7.08	1.62	1.1	1.93	3.14	0.49	2.3	0.88	4.55	1.49	2.78	2.63	1.99	1.93	1.61	1.04	1.5	6.46	2.36	2	1.04	3.26	1.73	1.6	1.39	3.08	5.28	4.88	7.67	1.54	3.21	2.55
ABCA6	0.21	0.63	1.01	0.59	1.22	0.18	0.89	2.33	1.26	10.31	0.84	0.64	0.52	2.19	6.78	3.17	1.23	1.69	0.39	1.38	1.08	0.64	0.74	0.74	0.43	0.12	0.07	1.1	1.26	0.9	0.93	0.61	0.61	1.13	0.55	1.13	2.29	3.73	1.85	0.64	1.31	0.48	0.02	1.57	1.88	0.68	1.6	3.5	0.34
ABCA7	4.81	3.35	2.03	9.04	6.85	1.91	5.77	3.83	5.77	5.73	6.28	4.17	4.64	5.02	4.25	4.09	7.06	8.1	7.01	8.95	3.99	12.32	7.33	6.98	4.61	7.85	4.83	6.33	2.28	6.1	3.78	4.32	7.87	2.71	13.52	1.63	4.38	4.86	5.37	4.14	6.14	12.25	5.57	3.41	7.84	41.68	14.71	4.67	9.84
ABCA8	0.25	1.07	0.69	0.59	0.13	0.18	0.92	4.54	7.94	31.33	0.38	1.4	0.04	1.88	29.34	3.65	5.64	8.44	0.39	2.12	6.58	0.21	1.48	0.69	0.11	0.75	0.25	8.28	12.54	3.94	10.37	3.11	0.35	3.44	0.7	0.87	4.84	6.53	2.19	0.21	0.64	1.93	0	0.23	2.35	0.38	0.16	1.05	0.14
ABCA9	0.13	0.52	1.79	0.55	0.76	0.53	1.26	1.79	0.73	7.83	0.54	0.97	0.45	1.84	3.11	1.76	0.21	1.22	0.32	3.42	0.44	0.4	0.3	0.38	0.31	0.28	0.08	0.41	0.87	0.3	0.47	0.15	0.25	0.87	0.98	1.56	0.69	2.27	1.05	0.98	1.04	0.48	0.34	0.83	2.02	0.46	0.82	1.66	0.52
ABCA9-AS1	0	0	2.98	0.51	0	0	0.2	0.73	0.6	0	0.64	0.52	0	0	0.15	0	0	0	0.29	0	0	0	0	0.64	0.62	0.58	0.14	0	0	0	0	0	0	0.67	0	0.56	0	0	0	13.83	1.54	0.97	0	0.59	1.85	0.67	0	0.15	0
ABCB1	85.27	1.13	6.82	1	1.92	0.36	0.66	6.86	2.19	14.63	1.42	0.66	1.01	6.49	8.68	7.64	2.09	3.95	3.97	1.66	1.64	2.02	2.88	1.34	0.26	0.73	0.38	1.32	3.36	1.45	2.35	1.87	1.3	3.01	2.1	15.92	7.74	9.26	12.71	1.77	3.49	1.54	15.33	5.67	2.6	3.42	4.38	3.02	0.98
ABCB10	25.78	8.58	14	24.24	17.58	18.89	26.96	13.04	12.47	13.88	26.77	27.55	22.95	9.91	17.21	15.37	7.2	9.48	7.92	10.46	12.23	12.59	9.16	8.25	6.61	12.4	9.95	5.49	10.89	7.73	4.61	5.4	7.26	9.74	10.91	20.92	10.58	7.16	12.62	12.33	20.39	13.3	6.88	18.73	26.02	24.73	14.42	21.16	23.9
ABCB11	0.03	0	0.54	1.08	0	0.11	0.02	0.01	0	0.01	0.04	0.15	0.05	0.02	0	0.09	0.17	0.08	0	0.07	0.04	0.2	0.09	0.13	0.32	0	0.01	0.05	0	0.05	0.03	0.07	0.35	0.05	0	0.01	0.04	0.06	0.11	0.01	0.29	0	0.04	0	0.02	0.34	0.02	0.14	0.23
ABCB4	0.24	0.17	0.66	1.59	0.35	0.19	0.45	0.66	0.33	0.89	0.54	0.12	0.17	1.02	1.16	0.6	0.49	0.63	0.2	0.57	0.42	0.41	0.53	0.36	0.17	1.64	0.28	1.32	0.34	0.59	0.35	0.32	0.16	1.02	0.68	0.48	0.91	1.54	1.32	0.34	1.5	0.32	0.03	2.37	1.3	0.29	0.72	0.65	0.21
ABCB5	0.11	0.31	1.21	0.49	0.51	1.27	1.45	0.69	0.48	1.03	0.32	1.5	0.29	0.58	0.79	1.18	0.27	0.16	0.27	0.42	0.37	0.17	0.31	0.28	0.38	0.11	0.38	0.45	0.37	0.21	0.49	0.25	0.18	0.19	0.75	0.21	0.22	1.05	0.37	0.18	0.45	0.36	0.46	0.67	0.46	0.53	0.63	1.56	1.2
ABCB6	23.11	13.32	12.71	24.85	18.26	14.62	108.29	24.09	16.19	8.07	11.43	11.49	8.89	30.67	15.08	14.58	31.42	17.9	45.89	18.09	14.76	6.64	5.12	21.86	10.4	35.44	27.8	11.54	5.97	63.38	12.94	12.52	16.22	15.35	15.53	57.06	9	7.99	12.16	39.3	25.47	32.15	12.02	24.25	24.28	24.91	9.49	24.02	30.83
ABCB7	63.77	11.6	37.25	36.1	17.01	30.13	28.48	24.08	32.41	23.04	36.87	29.31	100.42	25.09	28.48	37.6	15.35	16.02	13.37	11.19	25.31	25.49	12.08	12.35	12.66	20.21	20.44	11.75	16.26	12.37	10.4	10.26	10.65	16.3	10.1	15.59	18.54	17.42	19.26	19.45	40.18	10.43	55.2	15.81	22.54	40.67	13.7	16.18	20.22
ABCB8	16.52	14.16	7.24	25.32	24.98	5.82	11.91	12.67	6.65	13.9	10.85	4.17	12.63	8.77	12.55	10.68	18.92	15.65	37.16	17.09	20.39	16.53	11.97	11.53	19.79	17.3	34.04	8.78	18.25	21.98	11.11	22	17.34	36.26	13.62	33.6	21.38	20.47	22.28	13.8	17.82	19.21	43.71	10.96	13.34	15.22	16.21	14.71	15.3
ABCB9	1.5	2.22	1.78	3.35	5.84	1.58	2.18	2.79	5.08	3.74	0.88	2.5	1.25	3.96	3.77	1.43	3.58	3.79	9.99	7.49	3.8	3.63	6.18	1.82	10.58	4.61	5.37	3.33	3.53	8.86	4.2	3.07	1.33	5.03	9.33	6.21	3.64	3.25	4.99	28.35	9.16	8.07	7.2	11.22	6.52	2.93	5.27	4.24	8.05
ABCC1	39.8	34.72	37.39	28.58	33.09	51.1	29.87	34.78	18.81	52.36	16.72	57.17	33.32	46.67	34.95	34.15	45.96	41.86	24.14	39.47	15.98	30.17	29.93	14.16	22.31	41.92	25.34	19.78	7.51	24.5	16.65	22.41	23.86	27.56	46.41	34.2	33.18	27.75	39.87	47.73	51.97	15.49	33.62	41.73	50.69	18.85	48.44	39.93	58.88
ABCC10	7.72	12.98	11.84	7.62	14.14	7.64	16.76	15.27	7.25	13.93	9.12	8.41	9.61	6.35	8.16	10.67	12.54	14.67	36.56	10.95	13.69	9.71	9.55	8.34	11.17	18.13	11.26	7.07	7.9	10.08	6.28	9.78	11.45	10.14	12.13	13.65	10.1	11.6	17.71	8.27	16.56	15.85	62.88	28.97	16.82	43.3	11.45	16.09	13.76
ABCC11	0.02	0.07	0.16	0.29	0.19	0.1	0.21	0.01	0	0.15	0.03	0.38	0.18	0.05	0.04	0.2	0.14	0.01	0.09	0.14	0.01	0.28	0.04	0.06	0.06	0.05	0.09	0.05	0.36	0.69	0.07	0.05	0.06	0.28	0.04	0.16	0.08	0	0.07	0.11	0.08	0.18	0.12	0.22	0	0.19	0.11	0.12	0.04
ABCC12	0	0	0	0	0.01	0	0	0	0.01	0	0	0.02	0	0	0.04	0.01	0.02	0	0	0.05	0	0	0.06	0	0.04	0.08	0	0.05	0	0.03	0.04	0	0	0	0	0	0.04	0.01	0	0	0	0	0	0.02	0	0	0.08	0.01	0
ABCC13	1.65	0.1	2.5	0.76	0.22	0.32	0.23	0.4	0.1	0.02	0.75	0.19	0.38	0	0.17	0.25	0	0.48	0	0	0.75	0.18	0	0.36	0.02	0.03	0.02	0.34	11.36	1.44	0	5.37	0	0.31	0.19	2.09	0	0.37	0.42	0	0.12	0.08	0.05	0.56	0.12	0	0.06	0.31	0.27
ABCC2	2.58	0.11	17.3	33.08	0.82	0.17	4.92	1.44	0.29	0.34	0.97	8.34	0.22	14.09	1.84	2.76	0.32	0.12	6.28	1.55	1.52	0.58	0.15	0.05	0.07	0.04	0.11	0.17	11.66	1.81	0.07	0.42	0.65	2.5	0.77	7.86	0.23	2.73	0.38	38.36	8.12	0.03	0.73	5.7	0.23	35.35	0.24	1.38	2.68
ABCC3	83.13	181.41	57.16	172.62	83.12	109.46	51.33	55.46	19.68	95.94	101.11	46.27	202.59	107.1	79.69	72.71	80.8	30.83	75.95	173.5	93.14	90.74	28.67	35.29	72.4	1.27	92.27	52.8	108.28	109.4	45.39	69.89	114.34	58.81	152.36	187.52	94.5	44.3	116.81	60.32	87.04	69.84	72.6	100.15	17.97	48.48	46.63	45.24	120.42
ABCC4	2.66	2.35	14.35	14.5	11.04	8.76	151.54	7.85	9.25	11.44	5.11	32.69	2.99	37.08	21.52	11.25	9.13	3.5	6.67	7.93	6.22	9.39	18.92	1.61	6.47	11.43	2.67	5.13	3.43	12.77	6.59	3.52	8.7	13.49	3.56	10.59	9.17	5.36	15.71	9.76	12.8	18.48	20.8	40.7	5.11	9.63	18.56	20.56	28.66
ABCC5	10.69	9.64	9.93	12.52	10.16	17.59	30.68	49.67	45.08	23.86	10.99	6.33	26.23	12.08	39.55	18.57	38.82	26.78	12.33	14.15	10.01	5.31	8.1	5.4	7.1	36.97	7.03	31.39	5.47	15.31	33.35	11.17	10.58	9.92	31.57	9.47	13.43	8.46	17.89	17.84	12.96	5.33	11.54	10.29	14.51	23.49	24.79	13.65	29.33
ABCC5-AS1	0	0	0	0	0	0	0.23	0	0.35	0	0	0.41	0	0	0.17	0.2	0	0.16	0.17	0	0	0	0	0	0.57	0	0	1.26	0	0	0	0	0	0	0	0	0	0	0	0	0	0	0	0	0.24	0	0	0.17	0.16
ABCC6	20.54	27.85	31.31	8.04	10.97	5.78	0.58	14.28	26.79	5.88	14.09	10.8	18.96	9.46	36.19	14.48	3.31	6.73	12.91	9.22	18.31	1.08	0.57	14.48	0.8	16.97	7.86	13.35	40.1	9.95	12.05	24.91	5.9	14.09	16.94	53.1	26.42	5.11	7.73	2.94	17.69	15.43	5.05	20.5	23.79	11.88	21.8	33.02	6.43
ABCC6P1	1.55	0.18	7.91	1.72	1.22	0.97	0.04	2.99	2.42	0.37	4.04	1.17	5.75	1.04	3.97	2.03	0.79	0.62	0.86	0.91	0.55	0.03	0.05	2.2	0.25	0.23	0.21	2.44	4.26	0.74	1.82	2.22	0.04	2.52	1.01	2.9	1.38	0.32	0.23	0.15	0.99	1.89	0.71	3.99	0.97	1.62	0.07	8.41	0.05
ABCC6P2	8.63	5.96	12.08	3.98	6.68	2.04	0	8.43	18.09	2.07	6.97	5.71	16.82	4	24.91	9.35	1.62	6.83	7.01	4.35	8.12	0	1.12	9.09	2.51	6.58	1.55	4.99	13.82	4.92	5.52	11.82	0.45	8.01	11.33	38.29	23.37	1.74	2.76	1.56	7.43	2.96	3.3	7.42	20.74	5.03	5.95	16.99	0.11
ABCC8	0.03	0	0.86	0.03	0.44	0	0.16	0.01	0.66	0.08	0.03	0.1	0.03	0.09	0.67	0.07	0.64	0.03	0.24	0.03	0.04	0	0.15	0	0.01	0.53	0.05	0.85	1.26	0.2	0.95	0.27	0.01	0.13	0.44	0.02	1.08	0.22	0	0	0.43	0.1	0.05	0.1	33.81	0.46	0.01	0.22	0.01
ABCC9	8.07	4.5	46.32	16.9	10.5	49.45	28.64	25.19	35.56	36.59	12.26	67.78	27.3	50.82	34.47	45.7	5.86	8.64	9.78	12.92	7.51	8.35	5.99	9.37	10	12.16	2.98	5.25	5.88	7.69	5.4	4.27	4.04	8.88	9.05	7.76	8.89	8.88	11.21	8.89	11.89	8.69	10.53	13.23	11.94	17.4	17.61	58.46	24.4
ABCD1	26.33	18.36	13.61	7.45	22.25	12.7	32.88	11.42	17.18	13.7	13.98	3.29	33.61	20.81	19.32	11.63	10.38	17	41.16	17.21	22.36	57.61	9.67	11.49	22.14	35.11	13.4	8.03	35.22	33.18	8.02	18.41	17.66	40.26	19.78	77.35	29.94	35.25	23.76	32.15	45.83	23.72	100.06	54.66	63.72	88.18	15.72	24.84	5.02
ABCD2	0.19	0.21	0.64	0.05	0.17	0.11	0.09	0.52	0.27	0.47	0.32	0.1	0.23	0.15	0.92	0.85	1.2	0.56	0.16	0.39	0.13	0.76	0.67	0.29	0.04	0.04	0.03	1.75	0.18	0.43	0.76	0.35	0.36	0.26	0.1	0.14	0.59	0.73	0.28	0.21	0.12	0.17	0.01	0.24	0.16	0.22	1.49	0.75	0.19
ABCD3	53.26	20.27	41.22	69.79	66.88	59.13	62.02	62.32	49.97	50.38	69.88	38.13	78.2	44.87	82.87	45.23	69.16	34.8	28.86	28.66	44.65	15.93	53.69	20.74	17.15	14.27	40.86	24.72	43.5	47.25	33.24	22.62	35.78	35.85	20.59	46.72	45.5	16.85	54.44	27.34	48.22	31.71	28.43	95.3	30.9	78.86	35.23	36.36	52.05
ABCD4	7.92	20.53	10.91	15.8	21.34	14.56	16.56	14.89	18.71	24.69	10.22	10.07	17.95	11.64	16.4	9.57	11.09	12.22	17.02	17.47	25.67	13.51	13.22	10.05	13.2	10.43	23.11	13.46	22.24	21.11	16.5	13.75	10.03	19.1	28.15	12.39	13.4	19.34	21.03	26.41	9.35	12.57	14.13	20.87	15.12	12.44	11.99	23.35	11.88
ABCE1	127.19	26.04	84.34	72.47	54.25	73.47	76.93	78.19	64.49	53.74	87.09	90.93	96.88	97.37	55.67	76.62	40.75	37.96	26	45.98	49.61	45.65	49.19	46.42	38.05	79.37	49.09	12.94	11.56	29.82	16.25	14.09	41.29	50.76	57.13	39.76	30.14	21.03	51.09	59.74	88.47	47.44	48.46	46.48	22.34	88.61	46.79	75.03	76.07
ABCF1	66.01	61.69	76.26	79.85	69.47	62.79	65.05	65.33	125.78	52.6	34.66	77.45	43.19	66.99	56.12	64.15	53.39	51.8	72.84	48.79	65.04	48.03	49.98	31.26	51.44	99.31	42.26	32.92	38.57	62.36	35.03	36.7	46.4	50.84	36.92	75.76	58.65	47.06	70.42	74.54	73.03	74.82	43.35	98.63	75.13	96.97	66.07	103.21	83.86
ABCF2	111.48	39.79	42.23	140.91	46.37	49.35	46.12	47.53	51.7	50.23	53.96	34.5	66.9	38.87	45.95	35.81	50.79	38.35	43.48	38.73	39.01	67.51	38.76	31.76	43.04	58.53	91.69	16.73	14.18	34.46	18.74	21.09	37.83	66.89	29.99	69.88	53.57	44.24	55.84	35.77	48.1	52.21	110.73	50.82	27.77	63.38	49.5	60.59	96.67
ABCF3	37.1	69.83	22.28	40.8	51.09	30.6	42.01	35.62	31.6	35.02	32.95	24.1	25.31	31.1	39.33	35.16	45.15	49.06	53.16	49.84	41	36.91	28.56	29.6	37.06	79.06	48.98	29.98	22.89	39.82	30.51	26.64	27.96	43.48	73.84	62.58	42.92	37.66	49.51	42.33	32.98	55.42	40.35	42.04	41.26	50.92	49.26	38.22	37.96
ABCG1	10.28	15.76	21.62	10.83	20.76	4.64	71.96	18.03	30.35	39.04	22.74	3.49	15.15	37.41	26.29	22.23	17.44	8.84	30.42	13.66	9.52	27.45	12.5	9.66	21.42	29.36	3.55	16.38	12.54	30.26	22.44	34.57	43.74	14.7	8.3	61.53	31.88	26.16	17.9	9.74	12.85	13.88	29.78	21.35	36.56	39.7	21.67	20.9	2.62
ABCG2	18.52	0.49	12.95	6.06	0.95	0.72	5.59	19.63	2.48	2.29	1.6	10.05	3.25	1.88	5.66	1.55	1.47	2.27	0.92	1.34	2.87	0.42	14.57	0.38	0.21	1.53	0.43	1.06	49.58	3.95	1.22	6.42	0.29	10.44	0.55	2.21	1.01	7.19	3.74	0.51	29.58	2.67	7.26	10.77	6.11	0.93	0.93	2.12	0.76
ABCG4	0.05	0.06	0.19	0.09	0.19	0.23	0.08	0.21	0.75	0.7	0.06	0.12	0.06	0.35	0.31	0.19	0.1	0.24	0.16	0.43	0.24	0.02	0.07	0.17	0.06	0.09	0.03	0.06	0	0.06	0.26	0.14	0.12	0.22	0.04	0.1	0.29	0.36	0.83	0.05	0.19	0.08	0.14	0.05	0.71	0.25	0.12	0.3	0.15
ABCG5	1.57	0	1.95	8.57	1.61	0.31	0.35	2.31	1.16	0.13	6.15	2.39	0.1	1.21	0.88	0.57	1.64	1.27	1.31	0.87	1.45	0	0.12	0.03	0.04	0.09	1.7	0	10.98	1.81	0.19	1.23	0.05	0.73	0.32	1.28	2.83	1.39	0.94	0.02	2.35	2.51	2.08	7.87	0.16	0.02	0.04	0.08	0.08
ABCG8	2.08	0.03	1.12	4.48	1.91	0.09	0	1.67	0.39	0.11	14.22	1.09	0.02	0.73	1.42	0.07	1.74	1.3	0.95	1.87	1.29	0	0	0.03	0.04	0.3	2.3	0	16.52	3.53	0.14	1.1	0.05	1.18	0.13	3.47	3.43	1.39	1.15	0	2.65	8.74	1.61	14.83	0.32	0.14	0	0.29	0
ABHD1	0.8	0.16	0.08	0.49	0	0.35	0.16	0.2	0.91	0.22	0.14	0.87	0.21	0.14	0.36	2.21	0.38	0.41	5.59	0.23	0.07	0	0.18	0.38	0.23	13.44	0.43	0.5	0.23	0.91	0.73	0.15	0.1	0.32	0.33	0.38	0.29	0.34	0.04	0.28	0.51	0.33	0.7	0.47	0.25	4.96	0.92	0.36	0.04
ABHD10	34.73	11.22	16.67	34.11	22.97	71.46	42.39	35.57	34.02	21.34	39.31	40.49	24.24	23.79	32	39.31	24.97	12.42	13.87	16.63	21.21	22.89	38.6	25.19	16.13	35.7	23.28	14	12.32	16.91	15.36	14.39	13.22	16.98	19.92	26.47	27.5	14.76	26.88	30.32	26.04	18.38	17.69	24.56	22.38	54.71	23.66	18.13	24.66
ABHD11	79.72	61.7	37.05	77.61	111.99	52.61	30.25	67.63	25.16	31.28	214.32	72.6	130.77	81.87	75.05	63.98	36.82	43.11	130.41	49.23	115.33	102.86	210.82	68.54	119.18	47.25	139.83	23.68	71.09	81.21	33.19	78.88	38.09	84.01	145.68	122.12	39.78	97.2	59.82	105.31	192.05	121.16	242.96	92.93	52.95	60.69	45.59	60.52	43.78
ABHD11-AS1	8.25	29.08	9.32	8.08	20.08	3.07	0.69	6.11	1.39	10.08	10.84	2.83	57.92	8.98	22.11	9.06	8.86	1.77	3.65	18.55	37.7	2.81	41.94	0	5.39	0.66	22.9	8.08	94.99	17.55	8.94	65.47	11.28	11.44	39.99	12.96	19	20.04	15.9	35.63	22.86	6.62	8.25	8.04	8.46	0.33	0.97	2.02	13.02
ABHD12	98.21	93.87	153.55	99.56	125.54	53.35	90.85	91.75	71.64	84.41	61.44	83.77	81.76	62.58	103.88	72.81	73.84	79.91	207.07	95.02	81.85	101.45	79.59	45.72	124.46	114.59	149.46	74.09	89.65	110.32	69.91	90.22	118	96.65	87.01	103.07	111.54	80.13	83.52	144.71	82.03	101.14	150.77	94.06	286.99	120.87	250.54	60.17	179.36
ABHD12B	0	0	0.11	0.24	0.08	1.6	0	0.28	0.16	0.6	0.14	0.14	0.82	0	0.39	0.45	0.06	0.08	0	0.06	0.1	0.14	0	0	0.04	34.24	0	0	0	0.39	0.05	0	0.05	0.04	3.03	0.04	0.11	0.1	0.09	0	0	0	0	14.7	0.62	0.61	0	0.36	6.4
ABHD13	31.64	6.41	12	7.41	8.12	16.54	25.58	8.03	12.74	15.06	13.82	13.48	19.94	10.63	20.71	14.5	6.97	8.62	3.11	9.13	8.29	8.24	6.47	8.59	5.55	9.99	6.36	5.89	8.4	8.2	5.65	6.94	9.44	6.92	9.69	10.07	9.4	7.24	12.07	5.09	8.41	8.68	14.18	13.84	13.68	15.29	9.48	13.24	12.64
ABHD14A	16.22	30.34	6.39	11.35	49.74	32.72	51.96	17.69	45.19	27.08	15.33	11.11	19.21	14.8	21.69	19.37	27.32	17.33	56.73	31.14	24.03	37.14	24.49	39.8	32.3	103.74	38.63	25.55	25.24	44.71	59.6	28.91	20.47	15.43	18.14	58.2	34.87	36.59	35	20.76	14.59	44.03	17.65	24.38	113.48	28.21	31.7	36.84	11.59
ABHD14A-ACY1	0.71	6.89	0	0	11.63	1.68	1.7	0.66	2.86	0	0	0	0	0.76	0.69	0	2.47	1.17	19.52	6.75	0	15.86	5.91	0.81	8.14	9.27	11.49	15.59	1.95	11.07	12.91	5.92	6.07	3.11	7.09	6.93	4.71	11.66	3.04	7.26	1.44	7.42	0.7	4.15	2.09	4.88	3.58	3.01	0
ABHD14B	93.13	125.76	31.51	38.06	126.12	44.54	241.16	44.56	46.76	81.8	82.11	44.36	143.84	57.19	97.67	71.99	68.38	58.07	107.15	98.94	167.18	113.74	45.03	130.42	71.31	65.31	200.83	80.94	119.52	93.85	104.56	93.92	39.26	62.69	52.75	69.17	105.84	127.52	115.56	69.67	109.25	169.09	133.1	157.26	169.56	52.5	50.54	97.71	96.07
ABHD15	12.79	19.29	14.23	14.43	14.22	14.37	20.91	8.35	14.59	16.68	13.01	11.7	14.69	20.77	21.11	9.95	12.05	7.97	24.66	21.54	17.5	17.81	6.56	8.03	17.97	25.79	9.33	11.19	11.36	21.47	11.47	8.2	6.2	12.67	10.73	57.64	22.85	17.22	15.2	12.97	23.21	24.37	19.32	25.14	32.02	21.24	20.47	17.41	5.14
ABHD16A	55.38	60.7	45.72	50.91	73.25	37.18	106.13	45.02	126.01	45.28	44	42.2	48.71	50.57	54.41	88.08	46.77	41.62	65.96	45.46	71.4	58.95	47.83	67.68	35.21	193.79	108.3	42.42	44.96	113.36	54.37	58.22	101.7	71.19	45.26	73.4	46.59	61.73	76.52	77.26	89.95	88.09	244.45	116.54	106.67	104.23	63.76	66.99	66.8
ABHD16B	4.03	5.12	6.34	3.45	9.87	2.01	20.75	5.2	5.04	5.67	1.36	7.69	3.36	4.49	4.27	3.69	6.98	6.51	21.21	18.21	6.02	3.85	4.9	4.8	7.5	15.15	5.25	6.85	2.11	11.53	5.39	4.74	6.47	7.83	6.08	5.84	3.97	4.81	5.19	7.28	5.91	3.9	15.85	4.61	6.92	21.13	13	17.29	5
ABHD17A	22.34	167.19	32.84	39.8	104.52	34.55	36.88	58.99	29.08	64.75	44.76	26.74	35.59	32.56	40.6	50.45	106.43	109.36	88.69	134.76	123.72	155.78	128.53	98.95	121.17	124.53	133.52	87.53	79.19	67.69	109.59	125.61	99.22	82.3	150.06	100.74	157.15	162.93	124.97	57.07	98.83	124.06	98.6	43.89	107.71	72.59	105.54	116.21	71.2
ABHD17B	19.19	7.84	13.7	11.45	12.57	14.47	18.59	28.65	11.85	12.56	17.25	38.78	14.24	21.64	12.91	21.28	9.85	25.14	9.52	10.98	13.06	8.4	8.36	6.2	7.88	10.95	12.01	6.69	23.55	11.53	7.94	13.43	7.89	16.81	10.17	7.88	10.04	10.79	14.03	6.68	19.45	10.16	19.09	22.04	12.16	19.4	10.94	16.49	16.38
ABHD17C	76.54	106.67	114.16	81.98	85.08	136.75	110.07	101.51	75.99	76.96	141.34	125.1	150.58	94.15	69	95.39	93.87	74.37	79.68	185.68	106.8	57.62	96.3	54.82	58.21	52.16	164.04	39.67	58.94	39.91	42.72	98.13	94.94	69.15	167.67	49.52	37.48	31.8	118.8	71.18	141.35	49.48	146.02	132.35	33.8	68.69	44.27	55.79	303.36
ABHD2	83.23	79.57	81.91	69.07	151.5	128.52	221.09	557.02	70.37	258.53	92.88	55.18	418.06	178.08	191.3	200.09	153.43	41.99	45.87	213.8	131.66	35.47	35.86	20.03	35.19	238.89	127.09	72.55	84.71	131.21	72.24	72.32	63.79	48.27	157.09	68.7	105.56	50.37	170.42	108.81	46.3	45.95	330.45	353.34	116.54	168.68	55.49	60.55	325.1
ABHD3	19.18	24.45	41.22	37.77	35.09	32.78	43.81	34.57	49.59	45.62	56.93	55.47	24.37	29.75	69.2	40.14	51.88	24.47	45.06	24.57	26.46	25.57	19.2	31.27	26.27	27.59	22.77	37.7	42.81	36.92	38.63	37.38	19.53	23.77	37.3	29.26	41.88	13.38	32.3	54.94	53.86	127.36	47.08	46.03	29.62	40.49	50.48	23.76	26.76
ABHD4	23.11	29.57	35.85	21.21	62.96	28.47	73.9	65.06	88.33	53	34.03	51.17	25.17	69.22	50.07	45.34	67.39	85.36	102.26	60.79	27.16	19.14	26.83	37.67	38.25	58.46	42.18	53.91	42.95	113.73	58.37	40.5	38.28	66.85	27.45	148.37	48.38	50.82	52.72	91.15	48.18	40.43	49.77	50.38	59.54	74.36	48.29	40.39	28.85
ABHD5	11.64	6.43	8.29	6.75	12.27	12.2	6.97	12.72	16.15	18.84	12.64	11.55	9.36	22.7	17.83	18.68	14.43	23.65	5.92	8.22	9.98	9.63	9	9.86	6.93	6.37	7.16	6.7	18.23	7.47	6.93	6.87	7.5	7.43	7.38	14.04	7.81	6.48	16.13	5.4	8.97	9.29	7.61	12.73	10.38	13.91	11.04	13.62	11.42
ABHD6	10.43	8.18	8.56	20.98	11.61	12.07	36.72	8.37	14.66	17.47	12.26	10.96	13.64	8.1	21.59	10.38	26.2	14.32	10.52	7.84	16.35	10.68	7.22	12.49	7.53	6.88	15.07	16.77	66.92	17.61	18.23	16.53	15.77	15.39	9.17	7.76	13.87	14.7	12.73	2.55	21.97	16.31	11.94	16.77	9.38	15.64	10.28	13.98	27.61
ABHD8	3.46	10.18	3.71	2.07	9.72	1.19	24.63	3.94	11.52	10.33	3.42	3.7	3.98	4.85	8.12	5.79	16.28	10.61	47.02	15.04	5.16	20.47	8.75	20.1	14.58	27.47	2.11	15.73	6.61	15.83	21.82	9.65	8.54	19.03	21.84	23.71	23.24	20.2	11.52	4.58	4.74	15.97	5.77	7.98	35.45	17.56	10.36	12.84	1.51
ABI1	69.45	55.62	86.97	78.63	64.06	65.3	61.85	143.62	129.1	72.3	80.49	73.54	89.08	39.6	78.85	92.83	44.31	90.53	34.76	39.99	43.59	45	29.8	45.85	31.86	78.89	51.92	35.43	37.8	30.74	36.1	36.48	50.58	44.27	68.33	68.92	37.98	42.6	55.05	52.04	64.98	46.35	32.58	63.19	48.59	58.54	45.27	60.44	53.66
ABI2	13.5	7.98	17.84	22.35	16.15	15.93	20.58	10.45	22.04	23.09	11.02	22.24	14.33	22.16	17.94	28.68	8.27	8.47	9.64	11.06	5.56	14.09	7.2	7.44	10.22	19.86	9.42	5.87	4.59	10.1	6.98	4.8	9.34	6.49	14.04	15.51	12.14	9.25	18.77	17.17	9.33	11.42	8.35	21.91	14.08	28.06	13.67	26.86	15.54
ABI3	6.77	26.72	16.13	7.04	14.74	4.98	6.9	17.42	5.95	29.06	18.42	3.65	8.8	8.11	17.65	18.12	14.93	12.5	30.96	22.06	21.97	64.07	44.95	17.19	9.53	7.78	9.09	32.47	10.28	17.32	25.17	33.22	39.99	29.72	9.85	14.94	31.68	88.15	33.16	8.97	6.09	10.69	4.32	7.68	40.92	10.99	51.11	15.79	5.7
ABI3BP	0.71	3.83	8.24	3.37	2.38	1.59	1.66	19.56	2.68	90.69	3.54	0.73	4.24	11.36	65.6	21.67	4.16	12.16	2.45	6.38	7.86	6.93	9.78	5.85	0.71	3.86	1.27	13	7.4	9.22	9.83	3.93	4.59	6.88	4.27	4.61	17.92	46.13	10.42	2.39	2.99	9.9	1.02	5.5	9.77	6.04	22.14	10.9	1.87
ABL1	36.1	32.19	33.07	31.23	61.52	37.29	37.02	43.61	26.44	69	31.23	60.01	30.94	46.35	50.67	33.89	35.32	41.55	36.35	53.65	46.42	37.29	45.41	25.78	30.23	76.86	42.2	26.99	28.83	38.61	26.56	26.54	37.63	53.54	31.35	42.62	47.73	57.77	72.78	27.4	50.25	30.48	66.54	43.8	101.63	53.2	49.1	73.81	50.07
ABL2	6.6	3.21	9.73	8.91	7.04	8.78	8.87	11.09	11.49	16.72	8.33	10.03	9.07	10.4	14.29	11.8	3.73	5.19	5.39	6.41	6.01	6.07	3.95	2.93	6.22	9.57	4.15	3.15	2.23	4.22	3.24	4.33	2.96	5.98	4.75	6.74	8.55	5.77	11.56	11.9	8.66	7.81	7.19	9.11	10.53	25.71	10.75	14.24	6.75
ABLIM1	95.16	81.25	74.2	67.92	89.79	97.53	205.59	53.09	28.15	121.43	76.62	58.72	99.93	67.24	151.32	136.44	139.25	240.55	74.95	50.11	42.52	24.92	28.88	18.52	36.84	35.6	67.46	73.83	26.58	64.28	82.06	41.6	58.5	31.84	124.13	277.78	54.53	29.96	99.26	57.46	64.71	18.78	102.75	70.31	17.19	92.13	31.59	45.59	59.09
ABLIM2	21.8	0.92	12.26	9.31	2.83	0.13	16.06	6.27	4.91	11.33	10.13	12.05	6.27	5.23	7.07	8.31	3.15	13.88	14.34	5.94	19.41	6.12	9.11	2.67	4.51	0.26	2.54	0.81	3.27	6.14	1.62	13.25	0.45	13.4	7.47	0.91	2.83	6.24	7.38	8.42	19.62	6.46	25.01	16.35	8.36	8.35	1.9	3.48	3.68
ABLIM3	1.85	5.16	8.32	31.93	5.38	7.81	5.24	4.85	2.53	41.16	3.55	2.01	4.05	34.84	10.79	10.74	4.77	48.12	5.61	21.24	8.39	32.1	4.09	4.61	63.94	1.95	3.82	5.45	5.29	4.58	5.1	8.63	3.09	9.43	18.5	2.8	10.74	17.12	23.87	43.07	5.33	6.17	48.13	4.44	11.07	9.21	2.73	8.4	1.69
ABO	10.02	7.47	30.15	3.28	0.11	3.69	76.23	3.07	8.82	32.19	6.47	31.74	32.52	2.42	10.64	26.31	15.18	36.33	1.39	18.85	16.31	26.74	3.06	15.4	1.85	33.51	31.75	18.19	27.68	5.88	21.57	5.65	38.51	86.94	8.09	12.97	4.18	13.88	9.12	3.24	24.17	24.44	46.36	15.19	17.01	20.98	1.31	28.81	114.22
ABR	35.32	89.94	111.48	76.52	64.87	66.79	30.12	69.98	64.12	89.64	85.9	50.68	54.53	60.66	48.52	46.76	59.82	104.9	102.98	51.51	90.8	61.69	51.79	29.39	85.3	61.03	59.91	49.53	51.68	37.24	45.67	42.43	57.25	65.16	110.44	81.84	56.26	76.15	84.56	45.51	71.49	44.03	55.43	98.41	64.87	85.89	94.21	89.08	98.51
ABRA	0.02	0.19	0.06	0.03	0.04	0.06	0.24	0.22	0.37	0.19	0.05	0.09	0.1	0.05	0.39	0.33	0.06	0.04	0.02	0.03	0.02	0	0.03	0.25	0.08	0	0.06	0.08	0.12	0.06	0.05	0	0.1	0.02	0.05	0	0.07	0.12	0.61	0.06	0.02	0.1	0.05	0.06	0.06	0.04	0.15	0.42	0.1
ABRACL	270.6	126.9	195.85	68.81	56.93	125.22	25.02	144.15	60.06	92.73	168.78	176.7	156.27	57.26	78.6	101.35	53.81	52.2	22.36	47.87	114.4	56.05	103.46	132.59	90.59	33.59	37.96	50.81	103.97	197.44	52.68	55.34	138.8	73.34	158.24	72.75	58.79	82.73	91.69	43	92.16	57.85	67.45	160.97	40.96	37.4	57.66	86.55	70.79
ABT1	38.35	49.11	33.39	28.44	33.84	35.35	35.65	37.18	53.26	25.62	35.39	35.43	35.6	19.69	32.24	37.32	29.42	31.01	28.51	27.44	46.27	40.83	35.8	31.17	31.16	70.23	46.71	21.53	22.22	32.92	24.88	19.51	30.3	39.09	20.28	30.85	28.56	38.48	34.44	23.39	36.26	44.27	22.15	18.63	31.06	65.06	27.99	31.96	32.91
ABTB1	9.77	19.2	12.95	16.61	18.3	28.05	17.84	32.58	16.05	45.88	17.67	10.68	43.5	14.74	16.31	21.72	25.19	15.87	40.15	51.26	41.39	27.56	16.65	54.83	53.45	12.12	31.45	25.77	14.8	34.95	32.63	26.39	12.56	33.35	47.5	20.03	27.31	40.31	53.43	23.26	13.58	45.62	20.41	27.09	34.33	11.67	16.24	20.88	10.59
ABTB2	2.87	7.9	15.81	7.04	16.69	8.35	9.02	7.02	3.58	11.99	8.45	8.1	5.97	9.52	6.86	3.68	5.86	11.16	3.1	8.27	10.33	3.57	3.1	2.58	13.95	6.35	11.39	3.09	21.53	8.55	2.81	11.25	10.62	13.97	4	33.74	6.15	7.7	13.15	11.8	28.69	4.16	16.03	11.91	3.31	23.42	5.97	11.39	20.95
ACAA1	69.05	46.68	44.76	84.94	79.71	44.1	57.71	36.83	41.98	51.69	49.6	50.34	52.16	39.95	42.13	35.21	104.25	90.69	122.94	60.39	71.46	77.89	40.63	52.64	62.39	27.06	93.52	47.31	194.88	117.07	59.88	67.83	74.03	57.18	28.54	134.52	47.06	59.15	81.78	28.96	55.97	181.88	41.27	77.61	32.21	57.94	57.36	49.17	75.1
ACAA2	213.68	107.9	112.26	320.33	290.1	309.34	36.74	91.19	45.4	158.21	187.17	182.14	169.55	42.89	109.01	98.98	55.64	34.47	107.42	68.74	172.4	58.31	17.18	16.47	65.1	139.26	44.83	35.21	217.92	79.67	32.29	23.47	44.94	149	70.44	296.55	51.85	87.65	166.04	31.37	100.96	38.28	173.66	113.85	99.19	40.32	40.2	212.62	22.22
ACACA	31.34	12.86	31.73	51.96	21.96	30.1	20.26	21.79	13.7	21.2	25.03	31.26	21.02	36.15	17.39	15.7	12.65	20.33	8.97	16.51	10.5	10.9	16.35	8.01	22.88	25.44	15.54	7.56	6.56	15.5	7.06	5.09	11.41	12.13	17.48	17.06	15.88	7.58	16.44	24.66	43.63	13.76	28.49	209.47	23.74	53.24	11.21	25.95	25.03
ACACB	3.23	2.15	5.1	2.23	6.07	1.14	3.68	2.14	5.8	8.68	2.1	2.86	7.17	2.36	16.26	4.84	8.9	3.22	8.33	6.2	7.37	2	2.28	1.47	0.74	0.82	3.35	8.93	8.07	10.06	8.22	2.45	0.75	4.13	5.52	8.18	5.4	6.98	6.08	2.02	8.05	6.63	4.77	11.17	7.98	4.47	3.04	6.46	3.26
ACAD10	12.3	8.8	10.86	12.19	10.63	10.49	13.48	11.6	9.15	16.21	10.07	12.59	15.07	11.38	19.69	12.44	10.62	11.15	20.79	12.74	24.42	8.45	8.62	4.37	11.96	19.02	12.14	9.86	16.44	24.65	11.58	8.83	6.1	21.9	14.24	19.87	14.06	10.81	19.12	12.08	13.91	10.25	10.58	29.02	19.44	12.85	13.96	17.32	16.42
ACAD11	3.58	2.33	3.2	7.88	3.93	8.03	14.17	5.59	4.01	7.89	5.47	4.94	6.62	7.16	7.19	8.98	3.13	4.5	3.73	2.64	2.16	3.2	4.38	1.32	2.03	9.81	2.92	3.28	13.04	3.1	2.5	1.43	1.39	2.27	2.91	3.29	4.18	2.68	4.79	5.01	2.38	1.81	2.64	5.87	1.76	5.69	3.28	7.15	3.94
ACAD8	16.68	8.88	19.44	24.13	16.21	13.76	14.43	14.17	25.82	16.89	13.29	22.03	19.45	22.28	16.36	16.3	17.7	13.64	8.41	13.18	16.89	14.7	19.31	10.74	10.76	21.16	18.3	12.8	11.82	19.19	13.63	12.98	18.27	8.91	15.88	19.54	13.24	11.73	19.38	13.76	11.7	9.08	8.71	12.87	10.46	19.53	13.62	14.32	14.58
ACAD9	29.77	18.47	23.7	39.44	41.34	26.64	35.02	29.63	28.61	27.68	30.21	25.31	30.92	27.71	34.66	35.11	32.12	45.22	36.26	31.06	36.13	19.41	27.61	20.08	28.57	35.59	33.19	16.73	15.75	33.92	18.15	20.55	32.34	48.8	16.42	40.28	31.02	25.39	34.22	35.3	32.76	29.58	34.21	28.75	27.21	32.97	37.62	29.44	40.81
ACADL	0.02	0.18	0.07	0.02	0.08	2.21	0.06	0.07	2.25	0.09	0.04	0	0.04	1.31	1.77	0.44	1.02	0.82	0.05	0.34	0.04	0.08	0.1	2.13	0.06	0.06	0.07	2.24	0.26	0.02	0.93	0.04	0.09	0.13	0.34	2.16	1.04	0.22	0	0.02	0.02	0.02	0.05	0	0.03	2.35	0.07	0.2	0.18
ACADM	36.81	10.77	24.83	63.19	34.55	93.36	63.57	45.41	77.72	48.3	31.52	46.18	52.28	22.56	89.58	46.17	35.12	49.6	41.31	23.91	62.62	22.46	28.35	45.66	17.26	44.23	49.15	25.28	83.37	77.77	45.16	17.06	18.03	27.19	14.63	56.3	35.9	21.82	31.09	30.48	69.51	32.25	6.64	69.75	39.75	30.7	16.88	34.07	13.71
ACADS	18.83	66.3	15.39	16.57	67.05	12.15	12.8	7.38	22.01	19.56	41.32	5.99	17.78	14.39	29.99	20.73	44.64	17.92	83.53	36.94	174.92	59.03	29.12	18.26	29.81	10.57	93.55	52.23	197.07	79.61	59.98	64.29	42.2	77.19	39.75	62.6	23.67	79.72	64.35	35.71	24.41	68.51	46.14	76.21	36.3	19.24	27.98	31.81	40.83
ACADSB	11.97	2.29	5.86	10.03	9.28	7.95	27.32	9.41	10.59	10.21	18.13	10.69	12.82	10.87	21.88	15.38	8.54	8.78	74.89	5.97	8.21	11.43	21.67	4.32	2.16	8.28	7.37	8.87	19.64	12.35	7.4	5.02	3.92	5.33	10.48	19.43	7.94	5.12	8.14	7.08	13.65	10.25	11.4	14.68	5.86	9.27	14.16	13.64	4.69
ACADVL	128.73	189.64	115.08	214.75	222	199.78	135.78	132.55	141.99	146.03	176.71	82.43	106.81	115.94	112.82	94.46	272.62	225.1	315.85	115.46	293.53	152.84	180.54	80.55	185.34	61.12	200.22	143.6	268.64	220.5	156.07	132.07	132.16	178.28	216.11	123.71	92.61	144.36	216.31	92.38	78.52	148.49	93.54	217.87	177.74	137.52	101.58	147.26	226.41
ACAN	4.16	2.16	0.78	1.42	7	2.23	11.59	4.35	3.15	2.1	3.6	4.1	1.37	7.9	1.15	2.44	0.58	0.1	2	8.64	8.48	1	1.63	0.59	1.6	5.09	0.34	0.08	0.06	0.88	0.1	2.11	4.59	4.9	1.47	0.52	3.9	2.91	13.76	2.41	0.65	1.55	9.38	4.01	3.43	7.5	1.3	11.2	3.99
ACAP1	1.19	8.36	6.03	1.81	3.36	1.41	0.48	4.79	2.57	6.25	2.07	0.92	1.74	1.48	5.96	6	15.52	9.16	7.51	5.97	5.25	19.9	19.01	5.8	4.03	0.58	1.08	24.81	4.03	10.44	15.36	10.2	7.15	8.07	2.63	3.36	9.99	34.68	5.14	2.61	1.49	2.92	1.13	2.75	6.19	2.81	21.08	6.52	2.43
ACAP2	23.85	17.21	27.54	26.29	19.97	21.52	30.97	34.22	27.63	40.67	30.47	25.65	34.26	33.44	51.63	44.06	13.04	27.97	10.67	12.52	14.37	22.14	10.62	11.9	9.18	28.26	10.58	11.87	12.2	12.19	8.98	10.9	11.86	10.9	22.32	15.07	17.52	11.22	25.96	22.57	18.56	10.51	18.4	32.79	11.2	26.12	25.29	37.09	23.24
ACAP3	14.43	12.14	15.12	30.22	27.11	13.6	8.01	10.04	17.97	15.89	7.5	14.74	8.99	11.85	16.27	8	23.54	34.55	57.39	15.08	22.82	13.92	9.95	10.52	26.43	39.39	21.43	14.68	8.86	19.75	13.61	10.56	11.9	12.74	13.81	20.6	10.97	17.23	24.26	19.39	28.64	18.17	16.62	18.77	35.29	19.79	22.86	16.1	18.96
ACAT1	119.49	15.86	43.61	141.61	38.34	94.73	60.55	96.99	81.78	41.57	85.23	79.59	56.51	39.34	80.81	63.36	57.65	34.11	32.71	22.52	38.06	46.61	52.7	36.82	19.93	69.1	41.18	43.58	52.11	28.2	42.61	27.02	21.51	23.65	46.83	32.04	31.19	36.46	33.66	51.96	96.3	43.59	92.06	31.56	58.37	59.54	35.56	29.23	55.32
ACAT2	92.38	28.77	72.58	82.28	71.96	88.78	43.09	24.78	52.14	17.1	67.81	107.06	11.43	58.12	29.04	25.92	19.99	43.5	25.37	27.06	33.39	47.88	25.54	15.17	19.79	24.94	44.14	29.03	23.35	22.78	21.55	19.51	26.27	27.7	14.87	12.29	14.32	16.13	20.32	11.55	45.59	42.97	58.79	109.17	36.59	87.87	16.89	45.31	43.95
ACBD3	66.69	47.05	71.45	67.11	38.8	64.5	74.76	65.14	118.67	63.99	71.63	93.37	64.01	66.28	62.58	78.07	61.51	65.69	39.61	38.8	35.95	50.03	39.2	37.83	23.23	53.58	39.33	41.54	23.21	39.97	38.95	41.93	36.55	38.86	43.63	74.1	63.18	28.62	60.41	54.74	76.2	109.75	56.54	55.11	41.69	128.66	82.4	67.8	71.17
ACBD4	4.66	11.18	9.75	6.37	11.07	6.49	19.59	4.51	11.7	8.89	9.57	4.14	10.41	7.63	14.86	6.25	9.87	6.85	12.13	20.43	12.39	11.38	7.28	10	15.65	11.58	9.27	9.35	33.93	31.18	15.37	10.82	6.42	9.14	14.6	20.99	12.62	12.46	8.51	23	10.01	17.16	16.8	12.1	14.03	6.12	7.68	13.77	12.19
ACBD5	35.25	27.46	50.8	49.64	38.49	36.12	59.59	56.17	49.87	37.54	59.89	51.34	41.92	17.55	34.54	35.45	22.29	14.93	15.94	24.29	24.73	17.73	15.39	24.27	13.19	13.25	49.47	13.46	31.53	15.16	14.61	19.01	11.91	22.45	27.36	52.77	18.8	15.11	37.83	29.68	42.25	26.4	7.06	43.03	15.57	32.78	20.07	40.74	21.41
ACBD6	42.46	57.26	42.07	35.95	32.28	31.81	23.84	26.04	51.39	24.57	27.17	34	32.93	27.36	37.32	31.08	22.01	21.02	36.15	40.41	37.88	22.04	62.23	21.41	38.93	51.77	41.29	17.11	12.28	30.3	22.09	18.41	37.28	44.58	70.27	47.12	54.94	34.59	32.58	29.91	81.14	39.45	39.43	32.71	42.94	61.69	47.94	34.91	49.2
ACBD7	1.66	0.62	3.01	1.31	1.27	5.12	7.23	14.18	11.56	2.01	0.78	5.25	2.54	2.13	6.79	13.14	0.66	1.45	2.8	2.87	1.73	6.4	1.03	2.41	3.58	8.58	1.06	0.82	1.01	1.88	0.84	0.53	1.01	0.93	1.96	0.61	0.98	0.51	0.91	1.94	3.26	1.5	2.58	6.33	4.89	5.63	2.39	4.42	2.4
ACCS	2.24	3.13	4.17	2.47	5.5	2.17	11.21	5.04	2.46	4.67	2.12	3.86	7.92	4.71	8.54	2.69	4.15	4.9	7.46	4.83	3.6	3.5	3.67	2.76	0.98	8.08	1.91	4.05	2.37	3.06	4.6	2.62	3.9	3.33	3.6	7.12	4.75	3.02	3.84	6.98	5.65	2.77	2.57	4.71	3.27	9.42	7.7	4.12	4.09
ACCSL	0	0	0	0.03	0	0.03	0	0.03	0.03	0.03	0	0	0	0.03	0	0	0	0	0	0.04	0	0.04	0	0	0	0	0.03	0	0	0	0	0	0	0	0	0	0.03	0	0	0	0.13	0	0	0	0.05	0.07	0	0.29	0
ACD	13.08	38.61	23.01	26.67	22.13	13.23	12.88	21.56	18.47	18.44	14.34	19.32	11.5	10.47	10.64	15.81	20.47	15.07	24.65	35.68	28.26	45.95	52.59	31.38	49.5	48.74	26.67	18.99	11.02	28.15	19.56	17.8	37.22	28.06	28.03	28.6	34.93	33.11	27.13	37.34	23.57	33.06	51.36	31.43	24.1	25.98	25.05	38.04	33.61
ACE	20.09	27.49	23	21.44	29.93	4.32	31.12	10.11	44.28	34.28	11.71	9.97	17.97	31.27	13.29	13.28	19.04	18.3	119.15	36.3	12.77	33.67	28.43	23.93	19.35	34.88	29.1	11.32	230.01	25.31	18.63	46.21	14.44	75.36	15.81	11.81	51.16	32.82	38.97	15.82	17.7	56.7	10.36	121.68	53.98	32.57	57.3	42.46	8.44
ACE2	5.1	2.02	4.84	2.37	26.85	0.07	0.02	6.3	2.7	22.51	7.3	12.56	38.79	2.92	1.35	6.14	1.94	7.38	1.33	11.64	3.65	0.06	0.67	1.41	0.36	0.46	3.12	6.24	341.76	3.12	5.63	30.36	6.42	19.2	1.69	101.6	50.9	4.82	14.88	0.24	7.24	0.11	0.04	34.55	0.34	1.12	0.91	6.59	10.25
ACER1	0.05	0.08	0.12	0	0	0	0.08	0.78	0	0.06	0	0	0	0	0.06	0.96	0.09	28.06	0	0	0.05	0	0.25	0	0.05	0	0	0	0	0	0	0	0.15	0	0	0	0	0.27	0	0	0	0.12	0.13	0	0	0	0.33	0	0.11
ACER2	9.4	10.06	3.94	1.03	34.01	18.7	7.34	3.87	13.48	21.93	5.44	3.45	27.75	3.61	50.1	12.27	103.56	3.75	8.19	7.69	2.81	2.45	5.85	3	2.46	2.22	34.72	55.12	5.88	29.97	53.93	48.82	8.55	6.12	5.24	5.33	2.9	3.48	6.68	3.52	9.75	9.11	7.57	9.61	6.78	16.32	11.21	10.64	10.89
ACER3	15.18	5.7	21.47	22.87	8.74	12.32	15.34	20.64	7.52	16.79	17.3	27.25	19.89	13.7	18.61	19.28	9.6	13.71	4.87	11.24	10.54	10.22	9.5	9.42	15.94	12.58	7.7	7.08	12.45	8.55	5.04	8.91	14.04	7.47	21.38	14.57	12.31	8.24	15.73	9.28	13.92	12.33	27.29	16.1	9.92	12.07	22.31	14.63	29.01
ACHE	0.64	11.13	13.71	12.46	79.34	6.83	0.04	11.53	45.27	2.65	54.1	12.37	19.97	6.5	0.65	17.56	4.1	27.06	2.47	23.28	1.81	1.34	3.9	18.32	1.48	1.25	16.88	4.1	33.25	19.61	3.77	42.32	0.41	7.98	45.47	40.42	17.63	17.94	8.33	23.51	108.05	8.49	2.88	11.2	39.2	1.5	2.37	4.86	0.39
ACIN1	48.59	45.39	52.56	79.61	69.02	73.14	70.6	81.15	87.01	61.94	52.18	64.69	58.67	50.15	58.78	46.64	53.73	48.25	99.48	43.51	58.24	62.53	61.92	33.97	46.89	53.05	63.42	52.69	35.05	45.85	41.56	40.77	63.99	62.02	89.4	53.47	45.19	47.49	65.31	60.33	60.14	48.8	74.18	65.95	48.01	84.24	65.08	78.12	82.09
ACKR1	1.35	16.81	1.32	6.01	7.6	1.36	0.71	17.5	6.88	86.89	4.98	0.63	2.37	26.51	47.57	18.47	48.31	125.31	13.33	96.39	74.84	27.08	50.35	23.38	4.73	5.8	11	42.11	41.45	24.62	60.58	40.93	3.47	41.52	18.61	8.54	53.59	289.88	94.47	5.15	6.89	39.25	0.33	2.44	32.91	2.29	8.22	18.69	1.89
ACKR2	0.07	0.49	1.36	0.79	1.3	1.59	1.18	1.14	0.6	2.78	0.44	1.46	1.05	8.58	1.93	1.5	1.74	1.9	1.18	0.72	0.54	0.7	0.48	1.47	0.73	0.49	0.4	1.04	0.95	2.6	0.92	1.62	2.73	0.63	0.34	4.16	0.74	2.01	1.13	2.01	1.27	0.8	0.31	1.7	1.25	3.28	1.11	2.65	0.96
ACKR3	11.47	12.03	9.85	11.48	25.58	6.94	19.56	20.4	39.49	31.63	13.96	11.34	17.25	57.02	19.9	16.02	8.25	31.51	27.38	34.04	33.82	9.88	46.71	13.89	12.82	24.82	14.73	8.55	20.7	7.49	12.84	23.45	11.23	21.72	8.15	12.63	13.11	69.13	32.98	16.75	5.99	12.7	11.34	18.11	24.87	22.82	12.3	41.99	13.23
ACKR4	5.55	12.25	2.27	4.25	2.93	1.57	0.38	2.11	5.38	17.91	4.52	1.2	13.62	2.53	14.01	14.14	27.43	3.16	3.66	10.18	14.91	1.31	4.53	2.6	2.87	0.63	3.81	27.57	21.52	13.32	22.44	16.55	26.94	20.12	3.41	12.87	4.43	8.17	21.7	1.85	0.61	1.24	2.5	19.75	1.04	0.98	10.55	4.12	3.07
ACLY	128.15	69.26	138.98	308.88	100.83	128.18	122.86	77.45	157.45	84.7	102.77	152.55	65.89	131.2	79.78	78.57	69	55.79	29.71	83.39	67.19	49.6	57.78	67.07	137.25	169.68	81.34	41.8	55.72	40.89	35.27	47.09	43.84	67.23	75.14	94.92	84.88	66.63	83.59	139.89	198.88	109.93	67.03	60.11	236.2	127.11	78.08	139.21	121.35
ACMSD	1.19	0.51	5.32	8.53	20.37	0	0	0.19	0	0.51	0.08	7.33	0.05	0	0	0.64	0.07	0	0	1.84	0	0	0	0	0	0	0	0	17.62	2.48	0.06	0.35	0	2.55	0.89	1.67	27.26	0	2.75	0.05	0.1	0.05	0.05	1.78	0	0.05	0	0.09	0.32
ACO1	75.65	26.86	30.43	55.02	68.01	43.02	51.95	101.6	78.24	48.32	54.05	55.61	28.4	51.24	54.01	29.3	51	19.61	28.13	29.85	49.95	37.45	21.37	25.06	17.17	17.57	60.56	39.43	65.97	53.87	46.67	44.2	23.9	28.81	17.93	40.32	36.35	31.27	50.53	29.84	49.82	103.05	84.96	88.18	54.57	131.33	49.44	62.2	35.59
ACO2	136.72	103.93	84.66	187.41	201.97	80.9	457.39	108.71	88.33	103.61	156.72	102.49	127.17	155.96	127.58	131.31	238.11	136.79	178.93	136.56	252.16	114.25	96.65	76.34	73.76	114.63	267.31	177.63	334.38	95.42	176.23	168.06	115.15	117.34	74.33	228.11	254.69	149.59	141.87	75.99	251.72	137.32	93.73	204.65	205.64	117.82	162.74	129.21	130.32
ACOT1	3.66	4.46	3.6	3.11	6.41	6.81	5.09	3.36	7.32	5.9	4.23	3.78	4.13	5.9	9.82	4.65	1.5	4.55	6.68	11.31	9.96	2.07	4.1	2.85	1.2	2.47	4.27	2.09	1.66	13.4	4.84	2.32	3.28	5.93	2.8	24.68	4.71	2.33	4.82	3.59	6.94	6.56	5.18	5.34	6.86	4.83	6.11	12.92	4.21
ACOT11	13.74	14.83	11.92	5.9	24.74	2.6	47.71	10.64	6.02	8.38	22.04	13.71	29.39	3.7	18.89	10.55	58.81	24.37	29.39	13.69	48.24	5.66	10.53	2.46	12.83	13.23	36.63	20.97	62.88	27.88	22.73	23.37	24.54	36.03	9.39	51.4	27.73	17.65	45.36	19.46	17.08	8.52	14.35	46.31	10.81	9.29	4.71	26.25	12.49
ACOT12	0	0	0	0.03	0	0	0	0	0	0	0	0	0	0.03	0	0	0	0	0	0	0.05	0	0	0	0	0	0	0	0.68	0	0	0	0	0	0	0	0	0.11	0	0	0	0	0	0.04	0	0.06	0	0	0
ACOT13	32.85	13.57	23.87	16.92	20.07	14.11	28.8	13.17	12.94	19.65	22.24	35.91	22.99	37.84	16.9	24.41	10.2	7.36	12.66	16.99	9.77	27.07	20.21	36.34	7.34	31.24	8.24	10.91	9.7	10.92	16.47	9.41	15.1	6.52	14.7	15.69	15.27	11.15	11.03	17.02	14.47	8.74	13.31	8.2	13.91	21.09	24.77	16.96	9.25
ACOT2	23.41	49.76	21.15	30.52	52.58	34.5	25.77	37.19	32.08	28.99	28.73	42.97	24.02	26.05	41.1	20.99	19.7	18.56	52.68	38.35	56.41	14.49	51.49	23.02	33.75	19.26	44.22	20.02	29.81	73.72	34	25.48	37.53	33.67	18.87	64.13	27.94	43.11	32.12	56.52	28.74	28.41	40.74	36.32	30.48	30.23	26.76	45.44	29.19
ACOT4	2.28	23.84	3.77	3.58	5.07	11.06	11.33	8.85	13.47	4.8	8.04	5.34	15.74	10.11	10.91	6.74	7.63	4.28	10.6	7.3	2.99	1.48	7.63	7.67	16.55	4.32	2.11	1.87	9.72	17.84	5.5	3.81	1.42	6.6	6.56	10.7	7.62	5.82	4.17	8.58	14.77	2.5	7.09	9.24	11.02	14.29	2.91	9.26	0.49
ACOT6	0.06	0.08	0.13	0	0	0.2	0.08	0.13	1.07	0	0.21	0	0.32	0.11	0.31	0.21	0.1	0.13	0.26	0	0	0	0	0.39	0.17	0.18	0.13	0.25	0	0	0	0.34	0.08	0.19	0	0.19	0.17	0	0	1.34	0.26	0	0.14	0	0.19	0.33	0.3	0.31	0
ACOT7	102.73	195.39	158.13	201.43	93.52	42.74	58.22	227.68	32.36	61.6	128.17	108.19	116.36	70.72	79.98	119.52	91.99	53.87	93.37	69.02	187.15	104.99	60.38	50.73	137.2	149.7	159.03	32.23	131.88	141.72	26.89	101.71	176.59	235.64	81.05	222.57	68.37	150.65	104.95	111.21	109.03	58.06	217.85	158.65	97.85	48.22	134.49	45.54	120.17
ACOT8	50.58	56.35	58.75	61.37	50.36	11.7	76.55	47.05	34.34	31.03	24.58	59.17	40.24	29.13	35.15	26.26	40.46	29.94	56.33	41.96	55.29	48.2	41.06	37.12	67.81	46.7	48.92	37.94	101.47	194.27	63.48	69.85	54.48	59.89	44.32	46.94	59.73	45.96	31.35	47.06	84.83	65.09	65.08	62.09	55.47	67.88	52.85	36.73	31.29
ACOT9	66.7	22.09	30.04	54.96	33.94	59.23	46.29	45.75	26.71	52.04	48.2	37.1	70.62	46.33	39.12	46.4	43.68	14.34	55.27	33.44	15.08	61.6	20.15	39.86	42.71	31.49	20.41	16.43	18.54	19.37	16.18	17.06	33.15	24.18	46.69	27.23	24.22	26.95	46.97	41.03	58.19	100.33	46.76	21.32	33.01	36.12	32.41	39.45	66
ACOX1	46.33	20.79	19.08	42.7	58.6	35.19	107.81	24.18	133.6	33.46	26.42	28.91	17.07	25.68	36.7	33.8	43.97	30.02	15.02	33.88	20.01	12.55	14.09	8.18	16.38	19	36.08	15.32	57.42	36.35	21.55	19.02	15.22	19.56	19.52	40.54	20.01	11.68	28.95	16.32	13.71	31.36	16.48	45.61	12.95	28.67	21	33.07	40.39
ACOX2	9.96	1.55	6.34	5.1	5.13	4.59	1.6	9.58	1.73	8.6	15.17	2.9	6.63	2.6	7.83	3.38	1.65	3.08	1.63	4.55	20.44	1.25	1.92	1.34	0.73	0.87	0.62	3.15	27.28	7.72	3.19	5.73	1.7	6.32	2.02	3.64	3.44	18.88	4.53	1.58	7.46	11.85	2.67	18.79	4.64	1.11	1.24	7.45	1.78
ACOX3	11.51	8.12	5.66	8.36	16.66	7.82	30.01	10.63	8.18	14.12	8.18	5.54	6.27	8.68	12.07	14.05	17.18	32.78	17.51	14.13	21.45	13.74	9.35	6.43	13.42	12.66	22.82	17.02	13.49	18.84	16.82	18.58	13.93	18.52	8.32	22.61	14.94	13.75	19.34	12.01	12.82	10.41	10.56	18.91	8.95	11.75	16.07	15.64	11.32
ACOXL	0.13	0.13	0.27	0.04	0.37	0.15	0.16	0.84	0.86	0.1	0.14	0.31	0.12	0.04	0.07	1.12	0.68	0.32	0.28	0.2	0.21	0.2	0.14	0.64	0.88	3.97	0.43	0.1	0	0.69	0.91	0.31	0.03	0.17	0.26	0.2	0.13	0.2	0.03	0.21	0.66	0.05	0.06	0.6	0.92	0.53	0.43	2.18	0.09
ACP1	187.89	112.39	149.58	144.76	133.44	169.21	169.23	216.12	167.12	98.89	141.08	171.13	151.07	123.84	162.46	179.31	85.86	63.55	126.58	79.67	122.95	87.9	78.06	129.83	102.53	184.83	135.28	57.3	64.56	104.55	75.88	63.16	83.77	95	122.71	146.25	112.42	65.39	91.92	124.97	71.2	106.89	162.4	158.59	71.23	137.26	147.42	94.17	131.27
ACP2	39.12	80.53	69.15	50.05	93.62	44.32	72.15	46.05	57.05	70.14	70.09	35.74	22.21	47.06	48.98	50.83	57.57	56.75	94.06	74.11	85.07	94.78	54.5	58.24	53.81	61.93	47.11	58.42	80.33	67.56	53.28	70.3	92.76	68.9	35.09	181.7	67.3	104.79	77.71	83.3	38.75	49.96	39.89	45.15	126.82	119.36	118.13	93.77	33.92
ACP5	128.11	190.03	120.71	32.07	95.01	24.56	11.76	55.72	54.88	139.59	99	18.24	78.42	32.89	81.4	115.67	53.98	64.43	182.24	143.27	93.3	401.8	95.02	119.69	82.04	35.64	34.83	95.42	46.16	74.92	81.74	299.07	182.47	99.04	46.6	67.44	179.5	266.56	109.75	75.32	100.89	57.53	26.84	74.06	134.96	63.83	455.41	147.72	28.49
ACP6	15.37	15.88	33.44	38.93	23.27	25.94	23.08	17.42	21.78	21.92	18.22	23.74	26.46	32.58	15.8	13.7	13.16	9.57	14.24	22.19	14.13	2.89	14.87	11.93	47.08	29.26	35.19	9.81	6.86	16.98	19.76	29.34	29.04	23.69	94.68	10.1	20.74	14.77	23.22	28.21	35.69	21.78	32.74	24.34	12.95	28.05	19.47	29.54	50.15
ACPP	13.59	0.61	1.99	2.79	26.22	0.76	7.09	9.23	10.86	5.09	5.08	7.54	16.83	3.53	9.84	4.2	8.98	97.32	5.68	4.81	4.13	7.8	2.25	0.59	0.58	8.61	2.18	6.04	2.69	8.31	5.31	5.11	11.41	3.37	1	1.1	21.99	4.75	12.2	3.74	7.55	7.34	6.37	6.32	4.73	0.76	5.12	4.03	6.93
ACPT	0	0	0	0.04	0.04	0	0.12	0	0	0	0.04	0	0	0	0	0	0.07	0.05	0.05	0.06	0	0	0.13	0	0	0	0	0	0	0.05	0.06	0	0.06	0.04	0.05	0	0.04	0	0.14	0	0.05	0	0.1	0.06	0	1.54	0.04	0.04	0
ACR	1.67	0	1.09	0.34	0.16	0	0.23	0.17	0.75	0.23	0.04	0.05	0.22	0.27	0.26	0.15	0	0.35	8.18	0.12	0.23	0.05	0	0	0.4	0.18	0	0	0.13	0.27	0.06	0	0.06	0.99	0.51	1.66	0.23	0.21	0.05	0.09	1.8	0.18	1.2	1.45	0.53	1.59	0	0.78	0.08
ACRBP	5.71	2.67	4.39	3.18	15.02	6.42	8.24	5.73	51.85	5.93	13.64	7.96	3.7	3.41	9.2	2.19	1.45	1.67	12.62	2.37	22.97	4.12	2.11	1.84	1.58	5.15	13.16	2.57	8.8	3.97	1.92	3.76	2.55	7.04	3.54	2.12	5.28	11.79	3.3	10.46	21.52	4.19	1.47	29.63	5.78	3.59	3.59	5.34	0.18
ACRC	0.77	0.22	1.52	0.9	0.22	1.09	0.72	1.02	1.78	1.11	0.34	1.24	0.97	1.47	0.82	1.3	0.64	0.16	0.21	0.27	0.08	0.23	0.42	0.08	0.32	0.13	0.04	0.37	0.1	0.26	0.3	0.1	0.23	0.27	0.34	0.11	0.24	0.15	0.27	0.18	9.53	0.09	0.29	0.44	0.46	0.93	0.48	0.37	0.2
ACRV1	0.1	0.09	0.27	0.19	0.05	0.07	0.17	0.05	0.5	0.07	0.17	0.32	0.13	0.15	0.21	0.4	0.24	0.11	0.07	0.23	0	0.53	0.66	0.1	0.18	0	0.13	0	0	0.06	0	0	0	0.32	0.24	0.62	0.1	0.13	0	0.11	0.28	0.13	0.3	0.16	0.74	0.82	0.06	1	0.25
ACSBG1	0	0.1	0.17	0.18	0.29	0.28	0.15	0.19	0.06	0.26	0.25	0.04	0.15	0.25	0.49	0.17	0.27	0.38	0.12	0.32	0.28	0.16	0.14	0.15	0.18	0.35	0.32	0.32	0.06	0.08	0.2	0.18	0.15	0.23	0.16	0.32	0.15	0.21	0.37	0.32	0.49	0.37	0.46	0.94	0.29	0.37	0.27	0.24	0.11
ACSBG2	0.06	0	0.05	0.02	0.04	0.07	0.12	0.16	0.02	0.1	0	0.21	0.27	0.06	0.07	0.03	0	0.02	0.02	0.03	0	0	0	0.04	0.09	0.03	0	0	0	0.05	0.15	0.04	0.06	0.02	0.08	0.02	0.18	0.03	0	0.04	0.21	0	0.13	0	0.07	0.17	0.19	0.45	0.04
ACSF2	22.2	13.71	25.44	11.08	11.39	5.25	95.98	17.61	24.47	21.02	8.03	14.56	21.22	10.15	27.7	12.76	15.23	15.77	41.39	37.53	14.79	19.32	42.95	15.15	32.79	26.22	14.52	38.16	56.87	56.52	46.05	29.73	41.58	19.99	13.28	99.6	29.3	18.84	10.15	40.12	21.5	10.57	8.43	45.26	11.74	23.2	30.8	21.24	18.24
ACSF3	11.61	9.16	10.57	10.61	14.6	8.96	8.65	8.39	12.04	13.25	10.61	9.78	7.59	8.25	8.82	11.18	14.72	11.07	19.2	14.61	40.73	16.02	14.21	11.9	11.47	11.35	16.64	15.98	16.47	10.54	13.53	16.36	12.75	23.32	13.02	6.98	29.3	17.23	18.28	10.18	18.04	23.59	17.35	21.56	10.34	16.07	18.54	11.74	13.24
ACSL1	27.47	13.57	25.26	27.78	48.39	20.9	120.47	23.1	83.26	93.4	26.83	51.95	37.33	39.14	34.85	41.26	24	57.29	50.61	20.2	23.02	24.71	15.14	15.4	10.5	18.83	22.49	26.02	15.19	17.52	19.26	14.62	7.64	9.69	16.13	43.11	28.62	20.43	41.34	13.54	29.84	18.44	41.54	24.77	30.42	44.25	36.1	51.45	43.78
ACSL3	67.8	27.52	85.68	92.82	69.87	55.57	280.56	70.82	179.56	50.48	74.14	53.67	34.58	123.67	57.45	61.39	53.99	70.85	28.57	36.65	27.53	26.06	25.48	62.62	32.19	73.63	35.45	45.1	20.18	42.47	49.77	45.68	46.57	17.83	37.83	33.88	52.86	15.53	47.69	43.64	69.01	66.98	34.36	54.56	53.52	143.36	49.62	53.92	55.04
ACSL4	36.71	18.57	61.54	59.45	25.29	65.29	27.27	47.66	47.13	101.09	40.86	53.89	18.82	105.5	50.55	43.93	43.42	31.81	20.89	33.01	35.32	65.21	28.95	28.59	17.19	15.8	22.65	20.39	14.54	32.96	22.32	23.7	21.31	44.14	23.98	31.58	47.32	21.57	73.57	31.17	56.22	27.58	74.99	90.85	48.52	40.29	34.22	30.48	40.4
ACSL5	244.3	110.83	158.73	128.45	33.21	75.88	314.56	131.83	24.54	116.7	135.21	36.75	194.6	65.54	212.71	344.43	149.87	36.1	256.06	134.74	327.16	86.54	41.58	67.15	148.68	25.07	117.32	70.25	799.75	156.14	67.65	147.06	95.31	196.05	101.06	224.84	88.9	99.37	130.73	93	131.66	36.17	536.25	267.89	65.96	581.26	108.11	47.66	341.7
ACSL6	8.49	0.14	1.79	0.44	0.41	1.14	1.12	0.81	0.8	0.46	2.67	1.17	0.43	0.4	2.52	1.09	0.4	0.58	0.49	0.26	0.72	0.83	0.37	0.3	0.13	0.13	0.11	1.01	2.05	0.42	0.62	1.07	0.14	1.04	0.48	2.45	0.55	3.06	0.26	0.08	0.11	0.15	1.71	6.49	1.67	0.36	0.46	1.35	0.85
ACSM1	0.03	0.42	0.09	0	0.61	0.18	0.34	0.48	0.98	1.41	0.31	0.1	1.19	0.12	1.34	1.09	0.62	0.93	12.07	0.83	0.98	0.24	1.13	0.09	0.05	0.36	0.18	2.82	0.25	0.52	2.78	1.67	1.24	0.09	0.37	2.62	1.52	0.27	0.49	0.53	0.06	0.03	0.1	1.11	0.17	0	0.56	0.2	0.19
ACSM2A	0	0.03	0.04	0.02	0	0.02	0	0.06	0.06	0.14	0	0.13	0.04	0	0.04	0.06	0	0.06	0	0	0	0	0	0	0.02	0	0	0	0.11	0	0.02	0	0	0	0	0	0	0.07	0.02	0	0	0.02	0.02	0	0	0	0	0.15	0.05
ACSM2B	0	0	0	0	0	0.03	0.03	0	0	0.02	0.02	0	0	0	0	0.16	0	0	0	0	0	0	0	0	0	0	0	0	0	0	0.03	0	0	0	0	0	0	0.03	0.03	0	0.02	0	0	0.03	0.07	0	0	0.14	0.05
ACSM3	9.21	15.18	12.1	7.61	34.53	14.1	5.35	5.95	12.31	24.04	6.32	19.07	52.69	21.05	17.5	10.99	11.23	25.26	15.98	41.88	12.15	1.31	18.59	2.57	5.6	0.18	44.34	16.13	4.91	37.56	14.59	6.2	38.25	18.95	9.8	142.66	33.48	4.8	24.5	77.13	85.13	32.72	55.13	38.47	4.03	0.89	16.45	14.79	7.11
ACSM4	0	0	0.07	0	0	0	0	0.03	0	0	0	0	0	0	0	0.04	0	0	0	0.05	0	0.08	0	0	0.06	0	0	0	0	0	0	0	0	0	0	0	0	0	0	0	0	0	0	0	0	0	0	0	0
ACSM5	0	0.51	0.63	0.18	0.11	0.22	0.99	0.21	0.19	0.97	0.51	0.39	0.21	0.04	1.16	0.49	0.22	0.43	0.75	0.23	0.27	0.25	0.21	0	0.07	0	0.02	0.69	0.14	0.44	0.64	0.66	0.55	0.31	0.25	0.15	1.04	1.51	0.41	0.07	0.02	0.07	0.08	0.14	0.07	0	1.75	0.14	0.09
ACSM6	0	0	0	0	0	0	0	0	0	0.04	0	0.04	0	0	1.46	0.04	0.1	0	0.04	0	0	0	0	0	0.03	0	0.07	0.42	0	0	1.04	0	0	0	0	0.03	0.09	0	0.07	0	0	0	0.08	0.05	0.05	0.04	0.03	0	0
ACSS1	36.35	12.16	76.22	26.17	86.2	25.46	159.58	72.99	37.49	39.83	5.99	77.03	28.19	28.79	166.8	20.68	47.36	17.79	73.4	41.83	53.14	9.05	12.1	14.68	14.68	22.24	20.71	41.88	38.21	76.96	41.89	27.76	3.99	57.17	14.21	21.13	28.25	20.85	35.69	4.42	71.01	87.69	107.89	83.57	20.9	21.65	81.03	24.77	31.68
ACSS2	91.08	60.61	148.46	73.15	218.4	39.8	35.24	101.92	42.83	31.05	189.78	105.27	105.73	46.31	84.77	30.66	91.19	35.33	61.67	50.42	142.01	22.79	20.77	23.17	17.93	23.82	87.86	77.86	133.12	41.03	86.6	125.88	37.76	162.4	38.6	99.06	102.26	44.17	64.31	26.56	115.83	85.51	107.17	162.26	58.62	120.46	85.97	24.42	51.12
ACSS3	0.12	0.63	2.84	2.33	1.87	0.77	0.83	1.31	0.89	8.05	0.53	0.77	0.11	2.4	5.57	1.62	0.91	0.91	8.76	1.95	1.11	0.53	0.81	0.53	0.47	0.83	0.2	1.41	1.36	0.5	0.97	0.52	0.48	1.64	0.75	1.68	2.62	4.83	2.81	0.98	15.73	1.17	0.46	1.86	3.02	3.93	1.4	2.4	0.44
ACTA1	0	0.05	0	0.03	0.11	0.13	0.16	0.12	0.21	0.04	0	0.19	0.28	0.1	0.04	0.22	0	0.08	0.13	0.05	0.03	0	0.29	0.12	0.15	0.95	0.21	0.16	0.46	0	0.26	0.07	0	0.08	0.51	0	0.04	0.47	0.08	0	0.08	0	0	0.06	0	0.21	0.11	0.63	0.15
ACTA2	148.03	453.06	590.07	177.02	511.15	425.23	197.87	549.29	434.06	711.06	337.6	244.09	105.39	1000.91	806.44	450.51	242.03	391.63	246.14	1753.8	390.78	468.31	353.37	406.73	279.57	312.68	120.31	254.13	451.51	159.58	334.3	296.66	314.47	439.79	379.73	1137.2	841.64	682.65	1159.86	458.76	394.01	412.3	366.03	333.92	764.45	212.26	343.82	649.48	130.52
ACTA2-AS1	0.14	0.52	0.91	0.32	0.21	0.96	0.2	1.09	0.9	3.81	0.52	0.82	0.39	1.9	1.44	0.73	0.56	0.42	0.07	1.08	0.32	0.38	0.53	0.05	0.06	0	0.17	0.17	0.38	0.19	0.25	0.06	0.04	0.48	0.24	0.62	0.35	0.24	1.42	0.13	0.81	0.1	0.23	0.42	0.24	0.14	0.35	1.15	0.27
ACTB	3781.06	4878.66	4846.95	5859.73	3817.11	5175.22	1961.49	3574.75	2966.86	4140.36	5321.74	2725.75	4159.33	3460.15	3485.37	3851.85	4967.44	4465.12	3926.35	5098.8	4302.46	4626.77	4325.12	4949.26	6350.59	4279.26	4956.15	4196.58	4784.08	2326.19	3601.38	5760.14	5073.55	4146.17	4331.85	3666.71	4524.62	4683.13	5403.27	4453.68	5267.08	2832.81	4350.74	4356.21	4978.96	3003.6	5597.8	6189.58	5391.58
ACTBL2	0.02	0.52	0.19	0.09	0.21	0.06	0	0.24	0.31	1.02	0.22	0.24	0.14	0.12	0.18	0.22	0.1	0.12	0.32	0.7	0.09	1.83	0	5.94	1.21	0	0.09	0	0	0.56	0.03	0.22	0.65	0.06	0.24	0.13	0.24	0.05	0.15	0.8	0	0.17	1.7	0	0.09	0.09	0.08	0.44	0.69
ACTC1	0.77	1.97	9.1	0.05	0.26	0.45	0.84	8.56	9.09	0.16	0.25	0.88	0.21	9.17	7.7	5.53	0.67	6.36	0.58	3.48	5.33	2.96	0.48	2.42	0.1	0.74	0.47	0.51	3.74	1.09	0.2	5	1.42	1.47	0.96	0.99	10.84	1.48	16.22	5.29	7.62	1.12	2.52	0.53	3.09	2.82	0.46	0.96	0.1
ACTG1	2714.46	3106.61	2510.03	3550.19	4728.99	5295	3123.25	3436.41	3081.12	3315.13	4370.72	2594.55	3093.57	3329.13	2140.45	3771.08	4936.18	4387.36	2090.74	4116.37	4401.18	3263.71	2892.63	3625.24	5336.89	3470.33	3446.75	2989.53	2692.55	2759.57	2885.47	3717.41	3526.84	3442.39	5491.51	2306.97	2468	3687.65	3750.6	3376.44	2484.77	3716.05	1887.92	2355.57	2768.04	2368.91	2869.76	3931.46	5121.84
ACTG1P17	0.43	0.82	4.08	1.62	1.29	3.25	4.81	0.88	1.69	0.64	0.46	4.92	1.47	1.45	0.9	2.63	0.65	0.79	0.87	2.3	0.59	1.21	1.16	0.11	1.42	0.47	0.33	0.64	0.69	0.61	0.78	0.58	0.78	0.46	1.06	0.59	1	0.61	1.11	0.59	1.61	0.74	1.85	1.29	0.74	1.31	1.42	2.98	1.92
ACTG1P20	0.87	0.58	1.81	2.37	1.68	2.76	2.01	1.02	1.7	1.25	0.94	3.1	1.8	1.21	1.48	1.85	1.92	1.07	1.49	0.88	1.48	1.8	1.09	1.62	1.51	0.92	1.25	0.9	1.63	0.75	0.84	0.72	0.86	1.13	2.01	1.28	0.64	1.2	1.49	1.17	1.76	1.08	1.02	1.63	1.05	1.61	1.29	1.95	1.72
ACTG1P4	0.08	0.04	0.15	0.18	0.06	0.16	0.81	0.29	1.1	0.71	0.1	0.34	1.06	0.34	0.45	0.39	0.05	0.12	0.09	0.33	0.05	0.17	0.04	0.14	0.3	0.04	0.15	0.36	0	0.24	0.04	0.22	0	0.06	0.03	0	0.05	0.07	0.13	0.23	0.15	0.18	0.1	0.51	0.13	0.35	0.14	0.2	0.08
ACTG2	26.99	136.1	367.15	27.81	68.28	162.24	9.05	166.44	243.92	120.52	28.69	38	14.61	436.53	422.38	149.39	99.4	274.66	74.21	834.86	82.42	1060.81	137.86	418.18	18.36	106.55	92.21	138.05	372.36	67.07	221.15	144.47	52.85	149.76	74.81	744.21	358.73	78.28	595.54	79.59	393.81	169.39	107.76	64.53	312.45	74.7	53.45	1046.2	30.67
ACTL10	2.88	5.76	1.78	1.11	2.1	1.7	3.05	2.7	1.77	1.91	1.37	2.37	2.81	1.84	1.69	3.19	5.39	2.65	6.78	3.38	5.59	2.9	6.97	1.48	4.35	0.53	1.84	2.86	1.5	3.93	4.12	2.32	5.5	5.28	5.31	1.16	2.62	4.39	3.55	1.07	8.68	3.62	5.58	9.42	3	6.18	3.56	3.71	3.7
ACTL6A	154.43	145.92	92.2	118.79	73.84	88.6	94.01	108.13	99.65	55.06	93.19	96.31	100.99	92.66	114.07	110.51	43.82	47.11	40.14	56.31	61.02	57.51	33.97	58.75	66.12	157.32	75.51	22.22	21.54	54.36	28.18	28.3	42.27	52.4	152.12	55.46	70.02	40.15	66.62	73.99	83.6	82.61	95.12	103	33.31	101.66	56.57	72.21	74.06
ACTL6B	0	0	0	0	0	0	0	0	0.04	0	0.03	0	0	0	0.6	0	0.12	0	0	0	0	0	0.06	0.12	0	0.22	0	0.16	0	0.04	0.25	0	0	0.04	0	0.04	0.21	0	0	0	0	0	0	0	0.17	0	0	0.08	0
ACTL7A	0	0.05	0	0	0	0	0	0	0	0	0	0.09	0	0	0.04	0	0.18	0	0.04	0	0	0	0	0	0.04	0	0	0	0	0	0	0	0.1	0.08	0	0	0	0	0.04	0	0.04	0	0.05	0	0.06	0	0	0.04	0
ACTL7B	0	0	0	0	0	0	0	0	0.04	0	0	0	0	0.04	0	0	0	0	0	0.06	0	0	0	0	0.04	0	0	0	0	0	0	0	0	0	0	0	0	0	0	0	0	0	0	0	0	0	0	0	0.04
ACTL8	1.27	0.17	0.61	22.15	0.15	0	0.24	159.96	0.06	0	0.05	0.47	0.19	0	0	0	0.05	21.61	0.03	0.09	0.67	0.96	0	3.67	0.29	0.04	0.59	0	0.09	7.82	0	0.06	0	6.5	0.91	0	1.11	0.45	0.13	242.72	68.22	0.09	0.61	0.36	0	0.4	0.09	2.73	4.11
ACTL9	0	0	0	0	0	0	0	0	0	0	0	0	0	0	0	0	0	0	0	0	0	0	0	0	0.08	0	0	0	0	0	0	0	0	0	0	0	0	0	0	0	0	0	0	0	0	0	0	0	0
ACTN1	224.33	167.58	210.14	224.21	178.35	194.34	388.03	161.19	132.09	256.38	159.79	167.6	64.76	276.37	175.31	175.55	98.02	142.23	264.88	309.29	183.09	272.5	111.89	157.75	247.96	107.5	127.25	50.11	51.85	112.36	63.92	112.36	165.32	210.39	178.23	232.73	204.4	168.4	361.72	225.15	249.14	124.75	356.91	263.2	291.82	496.79	209.12	293.49	240.97
ACTN1-AS1	0	0	0.13	0.1	0	0	0.16	0	0	0	0.1	0.14	0.13	0	0	0.28	0	0	0.24	0.32	0	0.14	0.17	0.18	0	0	0	0	0	0	0	0	0	0	0.14	0.12	0	0	0	0.11	0.24	0	0	0	0.35	0	0.12	0.12	0
ACTN2	0.03	0.06	1.05	0.07	0.04	0.06	0.03	0.08	0.11	0.18	0.04	0.05	0.02	0.32	0.14	0.17	0.05	0.06	0	0.27	0.07	0.19	0.1	0.04	0.05	0.03	0	0.1	0.2	0.05	0.06	0	0.06	0.02	0.04	0.25	0.02	0.21	0.04	0.03	0.17	0.03	0.07	0	0.48	2.09	0.21	0.41	0.09
ACTN3	0	0	0.04	0	0.05	0.04	0.05	0.02	0	0.06	0	0	0.1	0.07	0.06	0.02	0.09	0	0.08	0.11	0	0.07	0.03	0	0.02	0	0	0.08	0.22	0	0.02	0	0	0.12	0.02	0.02	0.17	0.23	0.04	0	0	0	0	0	0.12	0.02	0.07	0.09	0.02
ACTN4	402.18	526.35	826.31	1095.2	666.46	497.41	313.19	654.47	347.73	410.95	500.87	285.78	347.74	533.26	245.36	677.42	670.46	769.16	441.05	777.12	798.21	444.61	668.94	335.87	956.76	471.33	726.5	359.34	684.34	243.56	400.61	660.69	909.45	538.98	1157.01	1193.08	634.48	495.55	774.68	1181.61	2436.94	477.67	484.89	750.5	609.53	804.05	616.12	648.32	670.36
ACTR10	49.14	33.81	49.91	43.15	25.05	53.17	47.48	66.87	57.52	61.58	62.43	58.2	68.36	61.81	56.96	48.29	34.01	47	24.21	33.53	37.72	32.17	27.08	47.73	30.79	23.53	31.31	23.04	24.06	37.56	26.88	27.25	33.24	36.14	40.71	35.62	36.01	34.56	44.51	63.89	41.58	26.72	42.46	47.72	34.1	62.38	29.94	34.14	30.48
ACTR1A	44.53	96.22	73.52	70.35	101.63	59.87	95.8	52.32	49.82	112.07	71.2	35.47	65.84	65.46	83.63	87.41	93.7	96.26	119.09	136.35	101.88	109.73	77.15	66.77	112.31	82.89	80.34	60.09	76.4	126.7	62.73	63.43	79.14	94.84	160.66	132.36	93.84	125.97	130.48	110.16	101.66	63.87	74.78	80.16	145.55	89.75	78.99	88.22	76.37
ACTR1B	68.75	85.5	36.46	30.9	77.68	36.72	51.73	46.45	44.7	47.68	35.38	33.16	46.89	35.93	44.07	31.08	56.07	45.53	90.27	62.56	88.26	71.64	45.57	44.37	47.71	91.57	105.33	47.75	40.26	55.42	61.7	44.5	56.23	56.72	44.78	78.93	52.48	59.93	66.86	52.67	56.91	73.55	46.37	82.16	42.93	71.31	40.96	63.51	54.49
ACTR2	190.74	94.59	206.77	177.86	123.07	159.73	135.13	182.4	107.88	176.88	205.87	162.3	169.19	283.09	187.43	199.8	107.92	144.57	90.53	96.28	124.97	126.79	109.38	97.51	83.47	63.05	79.88	75.58	79.28	111.7	80.94	83.46	111.65	99.59	151.68	127.23	138.38	96.44	179.44	109.98	118.51	113.68	127.72	224.94	98.51	149.77	191.38	227.78	183.9
ACTR3	128.34	69.9	183.06	164.2	92.7	120.48	85.41	145.04	100.86	131.65	152.91	105.58	110.49	74.79	117.72	165.68	114.93	134.39	76.32	68.62	86.76	89.37	76.41	78.76	66.83	100.01	59.26	68.14	64.75	64.08	61.27	76.13	79.03	67.33	141.49	88.58	81.89	77.94	131.98	83.29	110.48	75.25	121.25	126.23	86.94	97.99	87.37	98.57	100.11
ACTR3B	22.71	3.37	5.78	13.36	9.59	18.99	14.96	10.17	11.96	5.08	7.51	7.85	15.07	7.77	9.69	9.14	6.95	4.01	16.44	6.1	7.18	9.56	10.63	8.5	7.74	27.77	22.72	4.76	2.78	11.15	4.75	4.93	6.69	9.22	7.74	9.53	8.61	4.4	7.86	8.1	13.7	7.35	14.59	9.81	2.86	9.72	15	12.49	13.36
ACTR3BP2	0	0	0.05	0	0	0.08	0	0	0	0	0	0.05	0	0	0	0.06	0	0	0	0	0	0	0	0	0.17	0.06	0	0	0	0.05	0	0	0	0	0	0	0	0	0	0	0	0	0.16	0	0	0	0.13	0.22	0.16
ACTR3BP5	0	0	0.04	0	0	0.05	0.05	0	0.07	0	0	0.08	0.04	0	0	0.19	0	0	0	0	0	0	0	0	0.13	0	0	0	0	0	0	0	0	0	0	0	0	0	0	0	0	0	0	0	0	0	0	0.18	0.11
ACTR3C	9.11	7.73	6.07	9.41	10.88	7.67	26.13	5.77	13.63	8.74	8.24	4.64	8.92	8	7.93	7.21	7.25	6.53	25.84	5.08	4.96	8.94	4.02	4.77	4.92	12.45	15.57	3.11	3.97	12.02	4.23	2.57	1.69	7.64	2.29	19.58	5.77	2.04	9.29	15.67	1.81	7.33	15.26	16.4	4.3	19.75	7.99	7.7	2.77
ACTR5	13.93	10.33	16.49	12.85	14.65	8.35	16.71	11.5	9.73	6.34	5.76	18.88	9.28	13.17	9.74	8.17	9.08	6.75	20.31	8.75	8.62	8.98	7.71	6.74	9.89	12.71	16.36	3.3	3.97	12.6	4.56	5.6	7.97	17.51	11.68	17.89	7.85	7.66	8.16	15.61	13.87	11.82	20.99	11.91	7.11	17.49	8.9	15.78	68.43
ACTR6	24.46	12.21	29.96	30.39	12.7	33.63	13.38	32.52	33.92	20.68	32.99	39.49	32.93	21.75	31.09	36.33	11.53	17.61	8.98	11.57	13.52	16.5	16.49	16.91	9.17	9.53	15.61	7.23	13.73	17.42	9.5	6.86	13.06	14.36	8.72	16.16	9.97	8.93	17.89	19.06	21.34	10.44	16.93	19.78	9.54	21.35	14.91	21.36	22.54
ACTR8	14	6.76	14.46	12.72	15.2	15.98	20.6	12.29	19.55	18.98	13.57	11.53	14.89	15.04	15.41	16.73	8.53	13.33	6.99	6.8	8.62	11.43	11.94	5.99	5.78	9.66	12.23	8.32	5.62	12.47	7.43	5.58	9.84	5.25	6.3	9.08	10.05	9.09	15.75	6.38	11.93	8.23	11.08	14.79	11.29	21.38	16.62	17.68	18.09
ACTRT1	0	0	0	0	0	0	0	0	0	0	0	0	0	0	0	0	0	0	0	0	0	0	0	0	0	0	0	0	0	0	0	0	0	0	0	0	0	0	0	0	0	0	0	0	0	0	0	0	0
ACTRT2	0	0	0	0	0	0	0	0	0	0	0	0	0	0	0	0	0	0	0	0	0	0	0	0	0.04	0	0	0	0	0	0	0	0	0	0	0	0	0	0	0	0	0	0	0	0	0	0	0	0
ACTRT3	1.74	10.23	1.61	1.74	0.95	2.45	0.42	2.2	2.45	4.54	2.34	0.6	2.86	0.96	2.51	5.3	2.26	2.28	1.99	2	1.52	1.54	0.47	2.66	2.04	4.83	1.37	1.32	0.75	2.36	1.08	0.58	0.19	1.13	3.33	9.95	3.02	1.42	2.92	1.27	2.13	1.64	2.47	3.14	1.79	2.34	0.6	0.86	0.19
ACVR1	31.48	22.64	43.89	29.38	37.42	28.68	29.56	24.12	26.25	78.52	23.62	39.27	21.87	1580.03	43.88	28.09	19.75	20.98	50.02	41.46	14.15	20.44	15.29	26.81	18.07	12.41	18.79	15.46	9.67	26.79	21.35	17.91	27.8	21.62	53.14	109.38	51.26	23.24	55.69	39.25	25.3	19.96	34.97	40.83	26.11	30.3	27.3	35.4	24.77
ACVR1B	24.01	16.97	45.48	25.77	79.7	13.75	18.76	48.67	47.64	32.44	24.15	35.59	31.43	31.8	38.41	7.84	21.85	35.79	23.31	34.75	50.53	22.88	28.48	12.87	19.45	42.33	46.99	20.18	25.16	49.71	26.96	27.84	26.73	48.18	13.76	105.15	38.56	17.9	30.42	31.66	72.15	49.05	33.95	90.17	36.06	24.7	21.58	80.28	43.53
ACVR1C	0.08	0.08	1.61	0.49	0.44	0.99	0.03	1.22	3.06	0.2	1.61	3.56	0.15	5.01	1.5	1.74	0.68	0.15	0.3	0.16	0.57	0.81	0.39	0.83	0.26	0.06	1.21	0.63	1.14	0.49	0.5	0.67	0.5	0.26	2.47	0.35	0.65	0.15	0.78	0.35	0.11	0.8	0.15	0.78	1.46	3.09	1.44	0.93	0.32
ACVR2A	4.56	1.91	7.15	5.93	4.31	10.76	5.25	8.34	7.16	9.18	7.75	6.36	7.03	9.47	7.46	5.57	5.23	5.35	2.72	3.64	1.88	2.53	2.61	3.08	1.65	1.91	4.32	2.88	4.01	3.61	4.23	3.34	4.22	3.96	3.51	4.61	3.93	3.38	4.51	1.83	2.93	3.56	4.66	7.08	2.3	1.87	1.43	7.69	4.04
ACVR2B	1.6	0.62	2.94	1.36	1.65	4.06	4.16	2.86	3.35	3.61	2.12	3.77	3.73	3.4	2.75	1.74	1.32	1.04	2.08	1.54	1.46	1.64	1.09	1.03	1.55	2.63	2.31	1.81	0.72	1.46	1.42	0.46	0.97	1.13	2.09	1.13	1.06	1.08	1.98	2.88	2.37	6.49	3.5	3.61	3.51	14.36	2.1	6.64	4.18
ACVR2B-AS1	1.34	0.25	0.8	0.23	0.54	0.89	1.71	0.92	0.87	0.5	0.34	0.58	1.6	0.48	1.08	0.43	0.46	0.6	1.57	0.76	0.82	0.19	0.17	0.46	0.55	1.62	1.03	0.76	0.53	0.37	0.65	0.17	0.46	0.8	0.82	0.88	0.29	0.41	0.54	0.31	0.52	2.58	1.14	1.23	0.38	0.52	0.77	1.66	0.86
ACVRL1	11.58	11.17	14.65	5.38	16.25	5.37	9.3	10.63	6.77	32.97	8.34	4.85	6.39	16.34	13.22	8.52	11.72	9.87	13.14	32.64	23.94	17.54	32.01	6.61	8.45	9.3	5.9	10.36	9.44	19.15	13.28	18.84	8.1	27.41	7.58	11.79	18.42	45.56	35.91	7.18	25.99	19.66	5.1	17.93	24.85	11.38	20.17	33.8	6.17
ACY1	104.03	66.16	73.07	151.68	168.66	148.62	108.32	45.5	24.71	58.1	129.35	66.05	138.47	34.8	54.36	48.63	92.1	31.71	102.11	109.22	109.03	58.3	29.34	96.58	96.09	32	62.01	32.05	632.28	135.51	57.44	150.99	54.77	37.48	64.03	101.75	110.99	129	120.22	64.85	138.12	171.2	123.66	144.14	34	57.54	40.76	196.23	40.57
ACY3	13.62	19.67	8.88	16.71	21.17	5.73	0.79	11.84	13.95	4.69	20.58	3.29	21.49	9.24	16.8	6.97	19.72	4.42	16.53	24.79	80.1	9.25	21.51	17.64	33.23	5.9	6.19	27.58	764.67	47.19	32.99	53.01	33.99	21.95	9.98	16.42	11.9	25.89	19.19	10.06	21.75	18	10.86	18.38	6.38	3.46	6.1	22.57	24.87
ACYP1	44.19	17.5	27.16	42.77	14.1	23.75	67.17	34	28.02	12.13	26.1	51.81	46.78	22.1	23.2	51.84	12.83	11.02	14.43	6.13	11.69	16.79	4.65	15.41	19.47	18.72	6.7	4.17	8.18	9.04	2.96	10.41	9.06	13.22	23.25	6.07	9.86	5.44	10.7	13.75	17.66	5.18	37	15.04	19.51	3.26	18.73	17.03	24.72
ACYP2	7.6	5.59	7.89	2.78	4.05	15.51	27.97	8.63	10.77	12.43	7.16	9.05	4.86	18.87	9.72	14.92	8.03	11.56	8.37	8.58	11.45	10.73	12.46	36.24	4.77	25.83	8.01	13.94	7.21	11.78	15.16	7.9	14.89	8.69	12.65	8.84	13.54	9.39	6.48	6.5	1.63	8.91	5.04	15.13	5.5	13.86	8.09	7.56	3.86
ADA	19.62	17.43	18.2	20.87	11.2	9.28	9.98	11.87	9.69	18.66	16.39	6.09	13.7	12.67	17.34	14.51	20.48	13.11	13.58	20.87	15.95	54.23	13.62	19.21	35.48	68.97	16.1	46.55	267.28	48.41	28.26	22	34.7	24.7	14.82	35.06	16.73	32.62	15.11	45.31	11.88	21.49	45.64	17.36	10.97	16.62	28.25	28.89	22.53
ADAD1	0	0	0.06	0.03	0	0	0.04	0	0	0	0	0	0	0	0	0.1	0.05	0	0	0	0	0	0	0	0	0	0	0	0	0.03	0	0	0	0	0	0	0	0	0	0	0.06	0	0	0	0	0	0.05	0	0
ADAD2	0	0.04	0.06	0	0	0	0	0.06	0.03	0.22	0.05	0	0	0	0.03	0.11	0.09	1.36	0	0.27	0.04	0	0.33	0.04	0.12	0.04	0	0.12	0	0.17	0.04	0	0	0.03	0.03	2.2	0.05	0	0.06	0	0.06	0	0.06	0	0.34	0	0.13	0.25	0
ADAL	3.48	1.19	3.35	3.77	5.14	5.09	25.03	2.19	6.62	3.65	5.92	3.88	3.07	8.52	12.08	4.38	2.81	3.72	2.86	3.04	4.96	4.24	3.68	2.68	1.45	7.41	4.61	1.93	3.82	5.39	1.72	1.47	2.06	3.45	1.82	3.53	3.13	2.78	4.19	1.38	2.56	3.34	5.54	5.42	3.81	3.29	4.68	6.24	4.73
ADAM10	55.78	38.11	59.02	49.71	57.2	101.18	85.2	122.03	59.81	82.38	118.07	56.9	95.81	72.27	78.97	74.5	35.66	39.89	27.18	40.84	33.46	81.47	33.06	43.28	21.27	59.85	36.97	22.69	19.28	28.89	25.43	27.14	46.95	28.39	36.79	35.12	43.69	26.63	61.96	42.4	71.36	23.06	48.32	98.49	41.61	72.65	41.01	75.18	91.47
ADAM11	0.02	0.19	0.18	0.11	0.22	0.09	0.26	0.18	1.65	0.13	0.01	0.06	0.09	0.14	0.06	0.04	0.06	0.31	0.15	0.34	0.1	0.38	0.09	0.28	0.15	1.89	0.08	0	0.04	0.23	0.13	0.05	0.11	0.14	0.21	0.07	0.02	0.03	0.23	0.29	0.13	0.17	0.13	0.11	0.17	0.4	0.43	0.5	0.58
ADAM12	4.34	9.5	1.91	3.6	10.01	12.93	2.47	4.63	2.43	21.31	15.86	2.2	8.54	21.82	6.48	3.96	0.66	0.8	5.61	20.96	1.78	4.69	1.44	3.24	12.37	1.17	0.42	0.98	0.14	1.3	0.59	1.84	0.75	2.58	2.44	2.89	9.6	8.78	18.83	7	1.74	0.95	6.21	9.04	27.74	2.09	21.21	25.91	1.81
ADAM15	66.59	160.75	66.98	254.7	130.6	84.46	64.39	64.98	47.65	142.59	68.27	97.01	70.22	156.19	81.91	65.58	217.09	162.53	164.14	171.59	186.53	148.32	102.1	173.67	123.47	129.38	296.44	96.07	61.98	118.23	123.57	171.6	121.13	192.69	125.7	69.15	85.75	137.95	179.08	172.59	393.12	210.89	169.12	147.45	165.12	211.27	114.28	77.29	132.73
ADAM17	16.58	13.9	25.45	18.88	11.05	23.29	16.9	24.87	15.4	29.27	16.17	19.09	15.59	18.86	23.62	23.59	9.81	21.4	8.58	11.18	7.25	14.04	9.03	10.18	14.39	13.69	8	5.61	4.7	11.71	6.18	6.03	8.05	9.53	16.71	34.92	13.6	10.39	17.83	23.49	12	8.8	9.81	23.8	12.82	15.19	17	31.57	11.04
ADAM18	0	0	0	0	0	0	0	0	0	0	0	0.05	0	0	0	0	0	0	0	0	0	0.06	0	0	0.04	0	0	0	0	0	0	0	0	0	0	0	0	0	0	0.12	0	0	0	0	0	0.09	0.08	0.06	0.08
ADAM19	6.69	8.96	12.04	10.45	20.34	13.59	2.99	9.11	5.44	23.07	8.71	4.9	4.78	18.92	14.23	14.29	8.91	10.64	6.98	16.43	9.5	19.88	11.49	8.5	15.42	5.07	3.24	16.05	6.54	7.26	12.9	11.74	6.59	9.87	15.31	12.5	18.43	27.69	30.37	9.29	5.21	5.86	15.52	14.91	29.3	13.85	24.45	44.92	13.04
ADAM1A	1.06	0.65	3.42	4.87	2.74	4.26	4.41	8.43	4.45	3.8	3.09	5.86	8.5	1.72	4.52	2.57	1.45	1.14	1.34	1.26	2.01	1.34	1.55	1.07	0.58	1.11	1.36	1	1.34	1.25	1.22	0.19	1.09	1.51	4.62	1.13	2.09	0.61	1.23	2.51	1.36	1.15	2.19	2.28	0.92	3.29	2.33	5.91	1.56
ADAM2	0	0	0	0	0.04	0.02	0	0	0	0	0	0.53	0	0	0	0	0	0	0	0	0	0	0	0	0.02	0.03	0	0	0	0	0	0	0	0	0	0	0	0	0	0.14	0	0	0	0	0.07	0	0	0	0.07
ADAM20	0.04	0.03	0.13	0.09	0.02	0.09	0.05	0.04	0.2	0.04	0.03	0.33	0.1	0.07	0.02	0.02	0	0.06	0	0	0.02	0	0	0.03	0.09	0	0	0	0.06	0	0	0.04	0.03	0.02	0	0.02	0.04	0	0.07	0	0.04	0	0	0.18	0.03	0.18	0.02	0.16	0.15
ADAM20P1	0.02	0	0.44	0.3	0.03	0.23	0.15	0.2	1.5	0.23	0.03	0.17	0.22	0.28	0.18	0.3	0.09	0	0.1	0.1	0.06	0	0.03	0.06	0.05	0.05	0.08	0	0	0.04	0.05	0	0	0.06	0.66	0.02	0.1	0	0.16	0.07	0.1	0.02	0.06	0.14	0.11	0.24	0.09	0.6	0.12
ADAM21	0.08	0.03	0.02	0.12	0.1	0	0.06	0.13	0.06	0.32	0.04	0	0	0.23	0.37	0.14	0.1	0.13	0.07	0.03	0.02	0	0.06	0	0.48	0.18	0.02	0	0	0.09	0.06	0	0.06	0.04	0.12	0.07	0.06	0.05	0.07	1.32	0.38	0.24	0.07	0.06	0.13	0.19	0	0.94	0.08
ADAM21P1	0	0	0	0.03	0	0	0.07	0	0.14	0	0	0	0	0	0.03	0	0	0	0.03	0	0.02	0.1	0.04	0	0	0	0.03	0	0	0.06	0	0	0	0	0.17	0	0.05	0	0	0.12	0.03	0	0	0	0	0	0.03	0.13	0.03
ADAM22	0.08	3.12	0.52	0.35	1.24	4.89	0.81	2.28	1.64	3.44	0.67	0.64	3.05	1.73	4.06	1.08	0.41	1.12	0.05	0.83	0.32	2.83	0.55	1.09	0.6	3.13	3.32	0.65	0.49	0.57	0.56	0.3	1.09	1.18	0.82	5.51	3.19	3.37	3.84	1.39	0.17	0.42	0.05	2.79	3.44	3.51	0.56	3.94	3.52
ADAM23	0.16	0.28	0.92	0.08	0.71	0.27	2.87	1.08	3.29	5.04	0.45	0.16	0.03	3.24	3.44	1.01	0.73	2.8	0.2	1.24	0.98	0.48	0.77	0.41	0.28	39.47	0.18	0.75	0.6	0.45	0.98	0.71	0.3	1.18	1.39	2.01	2.03	3.23	3.67	0.53	0.72	0.87	0.17	0.92	2.05	1.75	0.87	5.47	0.24
ADAM28	5.3	8.83	12.42	17.7	52.03	1.34	2.43	10.95	27.93	45.34	8.52	7.49	1.7	4.65	65.31	16.49	43.65	4.17	12.99	41.08	8.42	9.29	12.25	4.11	0.41	16.1	3.84	44.05	6.4	15.8	37.61	31.91	26.09	8.56	67.75	9.19	48.1	14.88	12.86	51.32	5.72	11.77	5.27	29.62	5.04	8.32	89.74	3.08	1.42
ADAM29	0	0	0	0.02	0	0.02	0	0	0	0	0	0	0.02	0	0.02	0	0.03	0.06	0	0	0	0	0	0	0.02	0	0	0.08	0	0	0.02	0	0	0	0.02	0	0.03	0.02	0	0	0	0	0	0	0	0	0	0.02	0
ADAM30	0	0	0	0	0.41	0.04	0	0.02	0.08	0	0	0.07	0.02	0	0	0.1	0.03	0	0	0	0	0	0	0	0	0	0.02	0	0	0	0	0	0	0	0	0	0	0	0	0	0	0	0.04	0	0.03	0	0.04	0.22	0.18
ADAM32	0.15	0.06	0.06	0.45	0.08	0.2	0.76	0.16	0.95	0.44	0.09	0.34	0.06	0.35	0.52	0.27	0.2	0.13	0.22	0.2	0.09	0.07	0.06	0.16	0.16	0.09	0.04	0	0	0.15	0.05	0.12	0.05	0.06	0.15	0.04	0.26	0.15	0.56	0.12	0.2	0.15	0.02	0.3	0.22	5.47	0.12	0.04	0.2
ADAM33	0.18	1.95	1.33	0.83	1.97	0.46	0	2.14	5.97	18.5	0.57	0.33	0.11	3.59	7.22	2	1.63	3.63	0.8	5.02	2.33	0.73	2.11	0.94	0.09	1.05	0.41	1.91	2.5	0.99	1.71	0.78	0.18	3.11	1.28	4.03	2.95	12.79	9.98	1.42	2.83	2.2	0.24	1.37	6.2	1.3	0.74	4.9	0.33
ADAM3A	0	0	0	0	0	0	0	0	0	0	0	0	0	0	0	0.03	0	0	0	0	0	0	0	0	0	0	0	0	0	0	0	0	0	0	0	0	0	0	0	0	0	0	0	0	0	0	0	0	0
ADAM5	0	0	0	0	0	0	0	0	0	0	0	0	0	0	0	0	0	0	0	0	0	0	0	0	0.06	0	0	0	0	0	0	0	0	0	0	0	0	0	0	0	0	0	0	0	0	0	0	0.03	0
ADAM6	0	0	0	0	0	0	0	0	0	0	0	0	0	0	0	0	0	0	0	0	0	0	0	0	0.06	0	0	0	0	0	0	0	0	0	0	0	0	0	0	0	0	0	0	0	0	0	0	0.13	0
ADAM7	0	0	0	0	0	0	0	0	0	0	0	0	0	0	0	0	0	0	0	0	0	0	0	0	0.05	0	0	0	0	0	0	0	0	0	0	0	0	0	0	0	0	0	0	0	0	0	0	0	0
ADAM8	16.04	61.81	25.27	76.1	41.26	6.89	2.62	8.67	22.55	40.22	13.32	3.16	8.33	14.06	19.75	8.15	17.34	12.3	25.64	36.16	12	63.79	81	14.33	133.93	3.02	4.64	14.69	3.68	55.42	16.9	17.94	68.79	33.73	11.29	31.18	19.4	42.97	39.56	43.65	9.45	28.64	5.92	22.64	25.42	15.67	24.64	20.77	5.41
ADAM9	106.68	125.13	74.87	243.75	166.46	448.37	86.62	95.32	180.46	334.98	211.83	181.94	148.85	107.81	130.61	110.29	148.7	64.02	47.17	104.72	63.58	104.33	28.89	132.12	168.46	85.47	327.83	53.51	55.1	154.56	56.43	67.02	142.8	41.47	199.91	97.98	92.24	38.35	210.64	396.2	83.14	172.15	40.69	134.53	83.8	276.61	84.07	92.22	173.45
ADAMDEC1	17.75	17.52	57.33	8.11	25.2	8.91	1.16	29.86	3.31	25.88	118.59	6.76	11.25	7.55	30.99	59.37	4.91	12.87	15.64	7.79	22.11	23.59	19.81	3.76	0.34	1.26	2.53	13.37	2.99	7.87	13.21	27.4	61.96	9.95	3.24	7.68	11.63	45.02	15.06	3.04	7.69	2.37	1.94	19.43	20.02	11.61	94.29	38.92	7.66
ADAMTS1	13.74	17.56	7.27	9.07	14.16	8.9	8.86	18.04	17.03	138.34	11.46	26.61	6.88	45.68	72.18	45.37	8.73	33.41	23.89	27.55	29.3	7.66	34.53	14.09	4.06	17.84	5.49	7.83	32.88	15.34	19.29	43.73	6.14	16.29	7.2	5.57	43.43	35.94	45.83	6.58	7.29	15.09	5.82	6.28	17.52	10.03	20.67	22.34	4.5
ADAMTS10	0.4	3.23	1.1	1.38	3.25	1.05	1.95	1.82	0.98	7.26	1.12	0.63	0.71	3.67	2.94	1.43	2.06	2.43	2.78	7.03	1.63	1.41	7.34	1.09	1.58	1.19	0.29	2.03	0.81	0.94	1.41	0.73	0.73	3.44	1.75	2.14	3.72	6.34	9.75	2.07	1.7	0.96	0.86	1.64	3.87	6.55	2.95	4.3	0.46
ADAMTS12	3.55	9.24	5.54	7.54	29.3	10.98	2.68	4	3.32	43.74	20	2.56	4.98	26.4	6.39	10.3	0.6	0.94	2.28	12.44	2.28	6.82	1.23	3.55	7.41	4.82	0.99	0.14	0.53	0.6	0.51	3.16	5.25	5.09	5.72	11.93	12.92	17.7	37.88	8.13	3.18	2.08	3.06	20.65	31.15	15.55	15.79	34.01	6.27
ADAMTS13	1.35	0.75	0.56	0.57	1.52	0.36	6.99	0.95	1.91	1.09	0.29	2.86	1.3	0.56	1.2	0.91	1.03	0.56	3.81	0.8	1.1	0.79	0.81	0.19	0.29	0.49	0.31	1.46	1.74	1.44	3.14	1.01	1.07	1.04	0.53	0.47	0.55	0.48	1.03	0.93	3	0.94	0.72	1.41	0.54	1.98	1.32	1.08	0.66
ADAMTS14	1.53	3.87	3.66	8.13	7.61	4.3	27.03	2.31	1.24	20.91	3.29	1.21	1.58	7.83	6.24	14.08	1.27	1.41	5.34	5.96	4.26	9.77	5.41	1.22	2.24	5.01	1.85	1.02	0.71	1.07	1.17	1.16	2.02	4.45	5.74	2.73	4.2	6.43	21.81	2.48	12.4	3.31	5.54	4.85	9.17	56.71	5.25	5.95	2.06
ADAMTS15	0.33	0.63	1.15	4.71	0.64	0.33	2.48	1.1	1.4	5.56	7.14	0.03	2.08	1	10.48	1.56	15.34	1.62	0.96	1.27	2.62	0.76	1.43	0.6	1.12	0.46	1.04	5.26	2.35	0.34	5.05	6.35	0.57	0.98	9.64	0.32	1.5	5.38	2.35	0.39	0.12	0.61	4.59	1.38	2.41	3.54	0.51	3.19	0.1
ADAMTS16	0.05	0.66	0.01	0.12	0.52	0.47	0.13	0.17	0.28	0.34	0.91	0.31	0.09	0.19	0.71	0.29	0.04	0.07	0.2	1.89	0	0.68	0.38	0.33	1.18	0.38	0.11	0.05	0.26	0.09	0.04	0.21	0.2	0.21	0.53	1.71	2.48	1.08	6.96	7.19	0.09	0.08	0.24	0.64	1.64	0.75	0.84	1.41	0.24
ADAMTS17	0.05	1.36	0.61	0.98	0.4	0.57	13.58	1.75	2.79	2	0.53	0.32	1.46	1.04	3.24	1.18	1.59	1.99	0.21	1.83	0.79	1.8	2.98	1.06	0.58	0.26	1.77	0.74	0.53	1.15	1.23	0.98	0.1	0.9	0.63	1.04	0.79	1.26	0.27	0.16	0.3	0.56	0.94	1.63	0.96	3.13	0.34	2.78	0.21
ADAMTS18	0.08	0.04	0.13	0.07	0.32	0.16	6.48	0.24	0.1	0.75	0.34	0.23	0.14	0.6	0.36	0.31	0.09	0.5	0.14	0.73	0.15	0.15	0.21	0.09	0.02	0.8	0.01	0	0	0.03	0.04	0.16	0.01	0.1	0.01	0.12	0.29	0.38	0.61	0.71	0.17	0.09	0.03	0.22	0.29	3.42	0.16	1.18	0.11
ADAMTS19	0.02	0	0	0	0.06	0	0.17	0	0.73	0.05	0.01	0.03	0	0.02	0.07	0.05	0.02	0.04	0	0	0.34	0	0	0.15	0.01	8.7	0	0	0.03	0	0	0.04	0.01	0	0.08	0.01	0.01	0	0.05	0.01	0	0.01	0.1	0	0	0.84	0	0.27	0.02
ADAMTS19-AS1	0	0	0	0	0.08	0	0	0	0.09	0	0	0	0	0	0.08	0.1	0	0	0	0	0.51	0	0	0.13	0	8.73	0	0	0	0	0	0.15	0	0	0	0	0	0	0	0	0	0	0.19	0	0	0.18	0	0.25	0.08
ADAMTS2	6.84	44.13	20.48	19.14	84.13	24.66	11.91	11.43	7.54	111.26	44.39	9.26	14.34	46.89	23.63	27.26	3.94	7.43	10.05	35.3	14.85	25.41	5.83	16.37	33.15	6.51	1.85	2.27	2.42	4.13	4.11	13.94	22.76	23.21	19.4	37.29	47.21	89.36	94.08	30.61	11.44	6.62	11.67	31.89	73.31	36.24	64.59	143.58	10.36
ADAMTS20	0	0	2.74	0.15	0	0.01	0.01	0.03	1.73	0	0.01	0.76	0	0.25	0	0.02	0	0	0	0	0.01	0	0	0	0.01	0.03	0	0	0	0	0	0	0	0.02	0	0.01	0	0	0	0	0.03	0.03	0	0	0.1	0.01	0	0.19	0.03
ADAMTS3	0.29	0.19	0.16	0.24	0.42	0.27	0.43	0.92	1.7	3.47	0.51	0.39	0.49	2.07	1.34	0.63	0.23	0.42	0.16	0.95	0.64	0.05	0.28	1.6	0.1	0.38	0.07	0.2	0.42	0.17	0.26	0.14	0.12	0.56	0.19	0.34	0.81	0.83	1.83	0.23	0.26	0.23	0.3	0.47	0.74	0.53	0.27	1.32	0.17
ADAMTS4	11.21	23.3	7.15	9.18	17.78	13.87	8.6	12.21	8.11	80.35	14.32	13.45	8.4	38.53	25.36	33.71	3.64	12.48	45.85	36.87	31.56	10.99	16.52	13.19	14.59	25.6	4.89	2.17	8.01	6.23	5.45	26.82	8.09	13.07	7.05	7.85	48.93	15.1	47.22	11.61	6.74	7.54	14.5	6.72	26.08	13.75	29.49	27.73	8.85
ADAMTS5	2.52	2.62	1.37	2.02	5.9	3.78	2.13	2.61	1.57	11.23	5.26	2.19	3.98	10.92	5.55	4.3	1.62	1.03	3.09	3.68	2.33	1.43	1.48	1.19	1.98	2.62	0.75	0.91	1.3	0.8	1.29	1.81	1.11	1.64	0.84	1.9	3.73	2.69	3.82	1.8	1.5	1.57	2.61	3.16	3.87	3.62	7.12	6.27	2.19
ADAMTS6	0.23	0.49	8.56	0.62	1.05	1.39	0.31	0.91	1.1	3.18	1.23	2.13	0.69	2.47	1.35	1.83	0.24	0.57	0.42	0.85	0.15	0.42	0.44	0.86	0.68	0.99	0.14	0.06	0.11	0.16	0.22	0.17	0.38	0.49	1.93	0.99	1.19	0.84	2.85	0.88	1.22	0.26	0.43	0.62	0.67	0.7	0.58	2.2	0.29
ADAMTS7	1.62	4.25	1.4	1.92	9.23	2.79	5.18	2.56	3.3	8.41	2.36	1.36	4.03	7.01	2.51	4.15	1.95	2.31	4.5	14.76	5.96	3.37	3.54	2.73	6.13	5.71	2.67	2.19	3.67	2.36	4.07	3.77	3.29	6.93	8.22	8.6	4.67	7.3	24	6.13	4.81	3.61	1.65	5.35	13.17	8.57	6.84	17.28	3.23
ADAMTS7P1	0.02	0	0.02	0.02	0.01	0.01	0.06	0.1	0.04	0.1	0.02	0.05	0.02	0.04	0.08	0.05	0.07	0.01	0.02	0	0.03	0.07	0.03	0	0.06	0	0	0.2	0.07	0.02	0.03	0	0	0.06	0	0.03	0.04	0.23	0.34	0.01	0	0.01	0.01	0.07	0.05	0	0.05	0.06	0.01
ADAMTS8	0.18	1.93	0.41	0.14	0.59	0.08	0.04	1.51	1.14	3.31	0.1	0.57	0.12	3.47	17.37	2.25	0.84	2.93	0.5	3.39	1.11	1.24	1.48	3.59	0.03	3.73	2.3	0.83	1.61	2.24	1.27	0.91	0.75	3.75	0.87	2.49	3.14	3.77	4.48	0.59	1.18	5.51	0.05	0.98	5.58	2.75	1.43	6.19	0.51
ADAMTS9	5.49	3.15	1.57	8.16	5.49	3.31	33.52	6.64	6.39	25.86	4.57	9.29	10.19	30.7	11.66	7.12	3.62	4.29	15.71	13.03	7.22	2.87	5.78	5.65	1.98	2.76	3.22	1.14	2.85	5.9	2.38	5.08	1.32	7.26	5.02	17.35	18.21	4.94	30.17	2.85	4.48	3.81	9.17	15.75	9.59	11.15	4.56	12.98	3.14
ADAMTS9-AS1	0.01	0.04	0.03	0.08	0.04	0.1	0.12	0.08	0.02	0.11	0.03	0.12	0	0.13	0.18	0.15	0.02	0.16	0.05	0.28	0.03	0	0	0.1	0.13	0.02	0	0.06	0.05	0	0.02	0.15	0	0.03	0.02	0.03	0.03	0.04	0.13	0.06	0.05	0.06	0.04	0.19	0.05	0.02	0.06	0.08	0
ADAMTS9-AS2	0.07	0.35	0.47	0.26	0.1	0.16	0.23	0.25	0.21	1.29	0.11	0.21	0.08	0.74	1.51	0.42	0.32	0.67	0.22	0.71	0.15	0.24	0.42	0.16	0.14	0.04	0	0.64	1.26	0.34	0.6	0.33	0.03	0.64	0.15	0.35	0.32	0.89	1.27	0.48	0.05	0.29	0.33	0.19	0.35	0.08	0.17	0.53	0.07
ADAMTSL1	0.3	1.17	0.26	0.62	0.76	0.31	2.87	2.03	0.63	6.06	1.09	0.21	0.72	3.71	6.35	1.71	1.74	1.49	1.33	3.76	3.2	0.74	1.15	0.56	1	2.3	0.28	4.34	7.99	4.21	7.24	1.88	0.52	2.15	0.95	0.61	2.55	7.52	3.73	0.58	0.29	2.01	0.38	0.76	4.23	5.38	1.19	3.12	0.39
ADAMTSL2	2.95	3.49	1.24	1.34	5.41	1.16	47.5	2.31	2.39	6.06	1.74	1.71	1.01	3.36	4.02	2.69	6.09	2.28	53.55	8.21	3.92	1.68	5.12	1.3	1.49	26.2	2.04	1.42	1.76	3.61	2.51	2.34	2.04	9.56	3.26	22.44	13.54	8.6	16.13	8.11	1.6	5.02	18.97	3.66	115.59	10.13	3.41	7.21	1.66
ADAMTSL3	0.37	0.63	2.87	0.67	0.62	0.49	2.23	1.51	2.58	6.56	0.21	0.33	0.45	3.31	10.07	3.46	1.37	1.33	0.23	2.53	3.01	1	0.95	2.94	0.24	1.19	0.21	2.01	1.9	1.13	1.77	1.28	0.57	2.14	0.37	2.23	4.82	5.03	2.04	0.84	1.46	2.37	0.24	1.24	1.19	1.2	1.22	1.83	0.29
ADAMTSL4	1.68	26.84	5.87	59.83	30.35	19.54	6	6.14	5.44	30.39	2.68	2.16	9.93	5.81	11.63	8.64	4.19	46.24	33.52	42.97	3.46	18.08	3.93	13.06	19.6	17.17	1.39	8.23	7.87	7.06	4.61	6.17	4.52	6.46	10.23	72.94	15.09	33.23	14.13	10.1	5.13	8.85	1.62	5.21	12.69	10.03	13.2	20.02	1.83
ADAMTSL4-AS1	0.11	1.36	0.32	0.11	0.54	0.65	0.4	0.49	0.06	0.71	0.05	0.53	0.25	0.27	0.18	0.61	0.11	0.37	0.57	0.94	0.31	0.77	1.15	0.93	0.33	0.59	0.39	1.48	1.27	0.18	0.16	1.19	0.31	0.33	1.2	0.32	0.37	0.79	1.61	0.24	0.25	0.73	1.11	0.27	0.27	1.57	0.64	0.54	0.58
ADAMTSL5	3.25	5.3	4.26	1.82	12.14	8.25	5.28	7.74	3.33	6.9	7.8	3.34	5.85	2.08	1.74	6.02	3	16.89	7.33	4.34	6.95	4.47	2.51	14.09	4.21	0.42	6.36	1.91	9.84	5.02	2.68	5.62	6.99	6.5	10.84	7.67	4.05	4.47	13.7	1.6	3.32	4.52	19.07	8.98	0.76	7.73	8.16	11.97	0.13
ADAP1	75.48	402.44	106.45	72.06	97.09	21.56	51.14	34.05	50.47	48.14	60.29	34.42	77.28	52.52	70.99	56.92	110.44	28.55	156.06	128.3	182.43	49.85	54.81	24.92	170.97	42.67	169.38	34.02	68.7	85.71	40.88	120.11	91.62	160.45	60.99	219.79	176.72	71.47	123.74	71.92	166.53	62.39	206.71	109.76	62.41	93.35	93.08	51.43	102.21
ADAP2	4.74	13.29	12.41	9.35	11.06	5.86	12.13	12.4	11.15	28.68	23.21	3.67	11.55	10.02	17.99	12.55	5.49	7.68	15.22	12.97	10.94	19.53	8.74	10.92	7.58	6.19	3.54	13.12	5.97	7.99	8.31	9.56	16.94	12.8	11.74	9.84	21.79	29.54	16.96	11.5	3.61	9.77	3.68	7.61	32.28	8.88	29.55	17.64	4.52
ADAR	179.33	105.41	195.9	228.81	126.56	111.8	124.58	129.73	215.39	140.34	184.15	146.71	171.87	219.24	166.59	178.05	92.51	143.76	123.9	103.91	102.03	180.83	87.13	99.69	75.21	121.42	113.78	81.15	58.35	113.72	67.68	121.61	123.54	136.56	135.42	234.22	137.61	105.29	143.28	175.74	229.06	120.34	166.68	189.78	199.22	348.54	158.86	206.37	112.46
ADARB1	5.46	3.63	6.74	4.7	6.39	5.12	12.52	7.43	7.3	12.91	8.02	3.03	3.48	12.23	9.97	6.16	5.29	6.14	5.38	13.41	6.19	8.66	7.85	4.12	7.44	4.75	6.33	5.79	3.44	6.37	4.37	4.28	4.6	6.16	1.63	3.77	7.76	9.22	10.72	12.71	6.73	5.32	7.83	4.62	10.28	13.75	10.31	12.79	8.04
ADARB2	0.02	0.08	0.01	0.03	0.11	0.01	0.3	0.91	0.11	0.13	0.01	0.05	0.01	0.02	0.6	0.08	0.13	0.25	0.01	0.01	0.02	0.02	0.36	0	0.08	0.09	0.03	0.14	0.06	0.11	0.22	0.07	0.03	0.11	0	0.03	0.12	0.02	0.52	0.02	0.03	0.1	0.03	0.11	0.08	0.16	0.01	0.13	0.07
ADARB2-AS1	0	0	0	0	0	0	0.43	0.43	0	0.11	0	0	0	0	0	0	0.16	0	0	0.57	0	0	0.15	0	0	0	0	0	0	0.21	0	0	0	0.1	0.12	0	0.09	0	0	0.2	0	0.1	0	0.15	0	0.66	0	0.11	0
ADAT1	15.97	6.76	20.59	11.93	11.29	13.92	27.51	8.72	15.4	22.15	13.41	21.84	12.44	17	17.01	11.05	10.12	9.31	7.8	12.94	10.92	6.89	11.74	4.27	7.91	13.52	9.35	6.78	4.41	10.46	6.76	4.93	7.56	9.97	6.75	17.33	15.95	10.35	15.32	15.56	15.39	8.5	11.62	23.63	8.6	26.02	20.17	26.64	26.67
ADAT2	6.31	2.91	4.51	4.22	1.91	6.08	8.35	5.42	2.05	3.02	3.7	6.84	8.49	1.61	3.09	9.04	1.92	2.37	2.35	0.6	1.4	2.31	1.15	1.32	1.82	1.31	3	0.67	0.31	1.69	1.08	0.71	1.79	1.52	2.67	1.7	1.19	0.99	2.26	1.83	4.06	0.64	5.44	2.48	0.83	4	2.4	4.39	6.87
ADAT3	2.95	18.24	3.25	3.42	17.35	3.03	4.04	5.59	2.41	6	4.94	3.58	6.09	2.48	3.26	8.29	11.75	11.17	13.65	17.66	21.01	17.13	12.19	13.57	9.72	10.66	16.39	6.4	19.25	6.96	8.37	18.43	11.56	14.12	24.66	13.77	11.44	11.62	18.02	10.87	17.51	10.53	22.44	6.21	12.05	10.77	8.6	15.88	7.6
ADCK1	18.84	14.4	8.16	15.01	17.42	8.28	7.62	16.13	12.94	9.63	10.15	13.11	13.39	7.75	13.68	5.57	12.92	10.16	13.61	8.7	15.8	10.01	5.83	11.89	8.64	18.61	13.14	6.02	6.79	14.74	7.08	12.02	9.2	21.51	4.55	10.12	9.28	12.12	13.84	9.87	21.53	8.91	23.09	14.81	11.01	14.88	13.82	15.58	9.19
ADCK2	29.9	34.5	8.78	9.33	45.71	14.98	30.77	9.93	14.61	18.3	19.2	9.68	24.77	9.66	21.51	13.76	23.44	28.87	58.78	31.99	40.01	29.81	29.93	14.85	24.05	90.19	60.79	17.04	14.22	37.6	23.27	16.85	29.02	39.34	24.1	66.21	29.68	42.95	25.84	36.87	2.57	52.44	45.05	25.68	23.34	23.88	50.03	31.82	47.72
ADCK3	33.69	19	37.28	26.23	47.56	24.5	103.42	50.33	114.89	31.29	19.62	46.61	27.46	25.25	61.64	13.55	34.79	22.3	108.56	45.36	63.1	24.89	29.93	11.61	19.39	34.7	135.55	44.15	21.71	106.34	49.01	31.9	12.99	71.4	27.29	31.16	50.88	38.32	32.13	29.58	116.31	171.47	92.31	99.05	54.27	46.97	37.15	39.31	57.86
ADCK4	13.74	24.76	15.2	24.64	17.07	10.09	14.52	9.31	12.91	14.47	9.17	9.61	12.93	17.9	10.9	12.4	19.93	15.82	49.05	30.5	24.75	21.09	27.39	22.44	18.87	15.44	44.52	15.38	16.55	20.79	21.85	17.56	31.15	25.61	44.11	71.15	28.65	22.75	29.28	35.53	53.86	17.21	17.04	20.52	25.22	62.11	37.23	30.61	20.18
ADCK5	13.5	16.32	16.22	7.88	45.95	7.43	10.17	8.78	12.88	8.39	11.61	7.76	15.12	4.63	10.26	5.22	10.16	6.29	50.01	9	32.87	6.88	10.44	6.86	8.47	7.97	42.05	4.71	17.04	16.15	5.61	9.53	12.95	47.62	14.03	14.6	5.06	18.91	21.11	9.48	23.71	10.48	29.14	25.96	6.84	22.1	11.9	11.52	16.39
ADCY1	0.27	0.45	0.79	0.51	0.44	2.2	4.1	2.27	9.92	2.56	0.47	3.81	0.5	4.96	1.65	0.63	1.43	1.16	0.43	1.14	0.43	0.89	0.74	0.09	0.2	0.87	1.84	1.2	0.63	2.2	0.88	0.62	0.16	0.83	0.16	0.78	1.42	0.81	5.6	0.3	0.19	1.88	0.35	0.52	70.5	6.95	0.73	4.32	0.28
ADCY10	0.01	0.03	0.05	0.02	0.19	0.05	0.01	0.07	0.1	0.06	0.05	0.13	0.02	0.05	0.04	0.04	0.03	0.01	0.01	0.03	0	0.01	0.03	0.04	0.05	0.03	0	0	0.1	0.04	0	0	0	0.02	0.05	0.04	0.08	0.01	0.02	0.11	0.17	0.02	0.04	0.03	0.19	0.03	0.05	0.08	0.02
ADCY10P1	0.27	0.18	0.4	0.22	0.17	0.23	2.6	1.04	4.47	0.4	0.11	0.58	1.37	0.28	0.26	1.21	0.1	0.24	0.27	0.12	0.05	0.01	0.09	0.08	0.11	0.14	0.01	0.26	0	0.02	0.05	0.02	0.03	0.06	0.3	0.1	0.07	0.1	0.09	0.22	0.85	0.04	0.91	1.21	0.13	0.45	0.31	0.37	0.11
ADCY2	0.07	0.49	0.53	0.06	0.88	0.47	0.45	0.96	0.67	1.5	0.22	0.2	0.02	1.34	1.86	0.8	0.23	0.36	0.06	0.71	0.26	0.33	0.4	0.17	0.24	0.23	0.12	0.6	0.82	0.26	0.76	0.27	0.28	0.79	0.43	1.83	4.87	1.09	2.31	0.74	0.59	0.32	0.12	1.02	11.27	0.47	0.26	2.4	0.12
ADCY3	50.02	34.9	18.27	27.14	15.25	15.58	11.75	31.71	18.01	38.04	16.81	28.49	20.33	13.6	28.73	15.9	13.54	16.78	36.35	22.48	25.48	18.9	26.82	11.16	21.27	29.91	25.47	7.84	8.44	16.6	6.69	14.02	21.39	31.58	21.96	27.31	18.06	39.75	37.14	23.23	34.48	18.15	42.99	41.95	34.11	30.89	37.13	30.83	38.64
ADCY4	2.06	3.28	2.3	2.85	3.29	1.2	4.17	4.98	4.28	13.07	2.5	1.82	3.02	6.88	6.2	3.99	3.72	6	6.74	9.2	4.68	4.24	3.96	1.14	1.42	2.08	1.89	2.28	1.25	2.08	2.21	2.95	0.97	5.03	3.59	2	4.29	8.94	13.73	1.47	5.17	3.08	2.41	2.51	5.89	3.53	3.7	5.27	1.64
ADCY5	0.22	1.89	4.57	0.51	6.87	0.86	0.42	3.07	2.12	7.72	0.45	0.39	0.27	19.47	9.99	2.76	2.78	7.45	26.04	9.86	2.64	2.98	2.94	1.81	0.15	1.4	0.69	3.42	5.06	12.6	2.75	1.23	0.81	5.49	1.53	8.52	6.11	6.53	10.52	2.31	4.19	2.63	0.33	3.37	5.1	1.3	2.22	3.87	0.42
ADCY6	9.91	11.29	25.3	18.61	21.33	16.15	35.87	20.31	21.43	20.3	18.71	16.63	16.89	24.62	19.12	11.31	20.87	10.62	17.11	13.82	16.97	10.41	17.15	5.03	9.76	13.01	20.25	8.91	13.33	21.5	9.41	8.88	9.1	18.22	10.23	20.62	10.86	11.59	27.2	11.69	33.57	19.39	11.91	17.86	18.11	19.67	21.25	20.65	17.99
ADCY7	5.34	13.8	28.17	36.9	10.28	22.7	7.4	9.51	10.02	31.66	11.2	11.67	20.38	6.21	12.42	17.86	8.55	23.52	6	13.42	9.22	17.96	15.21	5.28	16.26	4.72	11.46	12.68	3.88	7.68	6.83	6.84	10.14	10.32	18.88	7.02	14.38	26.12	21.01	22.99	14.08	4.63	5.57	11.21	10.88	9.44	21.86	27.82	5.63
ADCY8	0	0	0	0	0	0	0.12	0	0	0	0	0.02	0	0.01	0	0.01	0	0	0	0	0	0	0	0	0.01	0	0	0	0	0	0.02	0	0	0	0	0	0	0.02	0	0	0.04	0	0	0	0.04	0	0	0.03	0
ADCY9	7.53	13.52	8.54	20.8	14.04	3.44	5.24	15.93	12.92	23.81	7.88	6.75	9.14	14.26	20.21	10.2	7.7	6.36	19.65	18.19	13.07	12.74	6.15	5.16	7.68	10.23	9.43	5.34	14.69	10.14	5.74	8.94	9.8	12.34	7.52	12.43	18.57	13.41	17.44	7.76	24.46	17.78	12.82	9.41	24.72	7	7.57	16.55	7.01
ADCYAP1	0.19	0.58	0.11	0.18	0.08	0	0.09	0.91	0.13	1.55	0.3	0.02	0.04	0.72	6.91	0.35	0.28	3.16	0.13	0.72	1.72	0.11	0.03	0.14	0.1	0.28	0.09	0.67	0.1	0.25	1.13	1.05	0.16	0.05	0.19	0.28	1.84	2.52	0.13	0.02	0.11	1.45	0.02	0.13	1	0.1	0.25	0.82	0.07
ADCYAP1R1	0	0.08	0.08	0.04	0.11	0.03	0.06	0.07	0.09	0.1	0.09	0.19	0.02	0.26	0.48	0.09	0.2	0.45	0.07	0.26	0.07	0.19	0.2	0.15	0.19	0	0.01	0.36	0.38	0.18	0.17	0.05	0.01	0.14	0.07	0.2	0.09	0.71	0.07	0.04	0.02	0.08	0.06	0.03	0.3	0.02	0.08	0.25	0.02
ADD1	76.76	52.82	98.74	80.36	120.06	94.72	171.18	97.47	113.51	169.79	119.55	81.61	65.99	138.4	130.31	114.85	98.99	108.1	84.91	132.53	151.4	106.53	100.18	74.96	97.49	67.46	109.66	97.49	81.05	99.93	85.82	79.75	80.91	143.12	115.43	228.14	116.68	143.9	147.18	118.49	100.54	87.78	64.27	165.55	136.06	117.32	74.71	150.93	69.43
ADD2	0.03	0.12	0.33	0.05	0.15	0.04	0.17	0.37	0.23	0.97	0.23	0.05	0.05	1.01	0.68	9.69	0.57	0.77	0.21	0.93	0.44	1.01	0.33	0.12	0.04	19.8	0.03	0.68	0.13	0.34	0.37	0.52	0.23	0.39	0.65	0.17	0.73	1.41	0.5	0.09	0.08	0.25	0.14	0.2	2.18	0.06	0.59	1.16	0.06
ADD3	138.95	27.71	103.45	70.03	125.2	51.13	373.05	80.51	66.18	77.29	148.4	74.35	144.53	111.72	192.82	174.52	39.62	53.53	51.16	30.56	89.32	15.68	56.16	14.22	19.56	35.85	92.58	32.95	40.11	61.08	46.97	35.52	61.24	87.1	62.75	191.61	114.28	62.55	90.77	54.42	109.8	74.15	42.71	369.58	41.05	67.12	57.11	115.35	112.96
ADD3-AS1	1.06	0.2	0.94	0.37	0.76	0.05	3.72	0.9	0.15	0.35	0.72	0.34	1.59	0.38	2.14	0.53	0.29	0.19	0.15	0	1.48	0.17	1.48	0.15	0.18	0.14	0.65	0.2	0.68	0.63	0.06	0.17	0.3	0.61	0.39	0.39	0.55	1.04	0.71	0.19	0.69	0.29	1.26	1.37	0	0.1	0.14	0.43	0.82
ADGB	0	0	0.02	0	0	0.02	0	0	0.01	0.01	0	0.02	0	0	0.01	0.27	0	0	0	0	0	0.06	0	0	0	0	0	0	0	0	0.2	0.04	0	0.01	0.01	0	0	0	0	0	0	0	0.01	0.02	0	0.03	0	0.02	0.06
ADGRA1	0.03	0	0	0.04	0	0	0	0.05	0	0.05	0	0	0.26	0.15	0.01	0.04	0.07	0.02	0	0	0	0.04	0	0.04	0.03	0	0	0	0	0	0.02	0	0	0	0.02	0.1	0.05	0.02	0.02	0	0	0.03	0	0.13	0	0	0.03	0.06	0
ADGRA1-AS1	0	0	0	0	0	0	0	0	0	0	0	0	0	0	0	0	0	0	0	0	0	0	0	0	0	0	0	0	0	0	0	0	0	0	0	0	0	0	0	0	0	0	0	0	0	0	0	0	0
ADGRA2	5.92	23.94	11.19	10.36	47.21	10.94	18.04	16.79	14.93	86.93	13.88	8.68	8.11	32.35	32.69	14.53	9.1	20.24	19.71	67.3	25.9	18.28	21.99	8.22	13.32	20.9	5.68	15.14	15.3	12.41	18.72	14.95	13.9	37.83	17.02	42.66	48.41	75.73	87.69	19.75	14.28	23.26	12.2	28.06	73.7	27.73	36	60.41	11.54
ADGRA3	20.57	3.55	11.02	10.52	23.53	36.88	96.48	15.15	9.89	31.45	23.74	26.66	8.79	47.87	22.86	4.34	11.5	6.62	19.88	16.33	15.29	8.83	1.95	4.62	13.54	24.76	17.47	5.27	6.32	12.05	6.08	4.51	9.82	18.42	16.38	30.22	11.47	6.45	20.59	21.31	13.98	15.34	12.17	23.64	11.96	33.21	22.76	39.15	20.61
ADGRB1	0.04	0.52	0.29	0.06	0.24	0.11	1.1	0.13	0.04	0.48	0.06	0.05	0.13	0.47	0.66	0.23	0.32	0.7	0.28	0.69	0.08	0.07	0.39	0.6	0.08	0.3	0.06	0.72	0.15	0.25	0.31	0.04	0.08	0.22	1.06	0.98	0.54	1.17	0.6	0.11	0.19	0.33	0.06	0.13	0.78	0.3	0.27	0.27	0.03
ADGRB2	0.11	0.66	0.29	0.42	1.81	0.71	4.14	0.6	4.59	2.56	0.4	0.32	0.49	1.5	1.69	0.3	1.12	0.7	2.15	4.24	2.01	8.32	0.81	3.4	1.07	6.63	0.41	0.64	2.48	2.78	1.04	0.42	0.16	1.35	0.8	24.84	2.5	2.05	2.78	0.81	0.73	1.22	0.93	1.77	28.03	4.83	0.64	4.15	0.53
ADGRB3	0.03	0.09	0.14	0.15	0.07	0.04	0.08	0.16	0.66	0.55	0.17	0.03	0.03	0.48	1.19	0.2	0.06	0.18	0	0.07	0.11	0.12	0.16	0.06	0.06	0.06	0.08	0.37	0.06	0.11	0.14	0.02	0.03	0.09	0.01	0.07	0.23	0.28	0.45	0.02	0.08	0.07	0.05	0.12	0.48	0.01	0.12	0.64	0.08
ADGRD1	0.14	0.62	3.15	1.27	2.42	0.28	0.19	2.67	0.5	15.71	0.6	0.18	0.74	1.69	10.91	1.95	1.52	1.86	0.4	2.43	2.28	1.06	5.24	0.99	0.24	0.77	0.53	3.64	1.33	3.15	2.72	0.38	0.85	2.26	0.71	3.93	4.62	13.98	3.01	0.96	3.24	1.67	0.14	2.34	8.32	0.57	1.39	16.59	0.42
ADGRE1	1.97	0.86	1.53	0.52	1.62	0.42	0.37	2.99	0.87	9.89	1.07	0.3	1.32	0.89	4.84	1.42	1.02	1.08	0.57	0.63	1.82	7.01	1.16	26.32	0.79	0.11	0.45	0.82	0.68	0.62	1.4	1.64	1.61	1.63	0.18	0.88	1.41	2.32	2.4	2.96	0.36	0.38	0.2	0.58	2.48	1.01	3.05	1.8	0.38
ADGRE2	8.41	4.55	6.46	3.69	4.63	8.18	1.35	11.65	2.5	26.68	7.19	2.57	6.15	8.75	10.29	7.42	3.08	2.6	3.13	3.16	7.94	13.81	3.42	8.3	3.86	0.49	0.95	2.34	1.68	1.74	1.98	9.23	3.6	3.87	1.02	1.43	5.14	7.79	13.19	2.86	1.68	1.7	1.09	2.92	7.07	6.5	21.94	11.03	2.1
ADGRE3	4.1	1.69	0.81	2.02	2.88	1.41	0.19	3.71	1.51	14.54	1.03	0.61	2.66	3.21	3.36	1.48	1.08	0.82	1.28	1.1	3.81	0.99	34.97	0.8	0.77	0.08	0.13	0.59	0.28	0.82	0.4	2.54	0	0.52	0.2	0.15	1.12	2.16	7.17	0.15	0.57	0.74	0.2	0.73	3.51	2.6	1.4	1.94	0.45
ADGRE4P	0.66	0.23	1.31	1.31	0.6	1.04	0.74	2.92	1.69	4.11	0.65	1.86	1.97	1.82	2.52	2.58	0.46	0.21	0.3	0.4	0.21	0.85	0.51	0.03	0.45	0.08	0.05	0.27	0.12	0.16	0.22	0.39	0.57	0.08	0.22	0.07	0.17	0.18	1.2	0.1	0.27	0.02	0.35	0.07	0.41	0.51	1.13	1.11	0.43
ADGRE5	44.45	116.72	76.43	65.9	99.63	73.1	58.53	170.26	66.84	104.04	57.89	51.37	77.84	23.35	44	84.77	76.13	35.37	65.98	83	143.57	221.81	85.27	89.13	74.74	16.87	88.61	40.49	49.95	83.19	54.98	96.06	76.33	185.03	146.48	101.4	82.23	96.09	138.89	68.01	141.45	61.04	196.03	101.46	105.2	109.97	102.2	125.96	93.85
ADGRF1	1.64	6.05	2.13	0.2	0.45	0.88	0.11	0.41	1.36	2.26	2.55	2.38	0.82	2.74	0.8	8.92	13.35	13.31	2.48	11.58	0.82	0.08	4.44	7.5	1.3	0.23	2.95	2.9	0.27	2.41	3.18	9.97	2.6	2.96	19.68	0.06	3.77	0.13	6.34	21.3	13.64	0.17	0.32	1.96	0.06	11.09	0.09	0.16	7.07
ADGRF2	0.31	0.01	0.48	0.08	3.7	0.15	0.07	0.04	0.02	0.05	0.01	0.52	0.1	0.19	0.05	0.13	0.03	1.11	0.79	0	0.01	0.03	0.26	0	0.21	0.06	0	0	0	0	0	0.06	0.06	0.01	0.03	0.03	0.23	0.03	0.12	1.47	0.24	0	0.01	0.06	0.03	0.05	0.33	0.53	0.03
ADGRF3	0.15	0.15	0.15	0.23	0.26	0.26	0.14	0.5	0.13	0.35	0.11	0.19	0.12	0.06	0.15	0.37	0.49	0.57	0.26	0.24	0.26	0.23	0.1	0.11	0.12	0.45	0.16	0.15	0.25	0.29	0.31	0.13	0.32	0.12	0.1	0.26	0.25	0.26	0.37	0.41	0.33	0.15	0.1	0.88	0.45	0.37	0.45	0.58	0.14
ADGRF4	7.08	0.34	3.36	0.96	1.68	1.1	0.47	0.33	0.23	0.37	1.54	4.97	2.46	2.22	0.09	4.96	0.2	21.67	1.33	0.45	1.29	0.47	0.21	2.01	6.51	0.41	0.09	0.07	0.05	0.66	0.09	0.4	8.18	3.05	1.12	1.95	0.03	0.47	2.15	21.75	10.1	0.36	3.81	2.89	0.54	0.14	0.35	6.29	2.09
ADGRF5	11.46	7.78	9.14	10.34	15.17	10.71	27.98	14.17	13.99	52.07	13.92	11.4	19.27	45.96	20.2	18.07	8.61	9.13	12.68	25.67	13.65	6.26	10.76	5.38	4.46	7.73	4.09	8.66	2.69	5.19	6.69	8.68	5.59	11.19	2.53	5.76	15.14	10.9	39.7	5.78	5.25	10.13	8.45	7.74	20.46	10.75	16.28	17.78	5.93
ADGRG1	131.71	105.1	147.62	48.02	146.07	64.83	324.24	57.11	68.62	159.75	27.71	112.09	62.39	77.78	81.18	50.71	103.29	119.4	263.72	158.2	113.82	156.93	44.8	43.09	125.25	556.55	93.76	43.87	30.15	130.69	60.51	86.39	147.93	146.05	113.99	768.75	123.73	39.46	123.64	265.08	147.61	108.6	208.66	224.17	113.68	563.06	38.22	138.14	58
ADGRG2	0.76	0.28	0.26	0.4	0.32	0.17	0.43	0.62	7.49	0.75	0.23	0.48	0.22	3.04	11.99	1.25	8.68	0.92	0.47	0.34	0.12	0.28	1.51	1.52	0.26	0.17	0.16	1.48	0.17	0.51	2.67	2.73	0.05	0.28	0.38	0.11	1.18	1.27	0.22	0.1	0.07	0.29	0.16	0.29	0.3	0.46	0.13	1.03	0.19
ADGRG3	8.13	7.11	0.18	4.71	6.42	3.24	0.11	5.53	2	19.72	2.99	0.87	4.17	6.52	3.91	6.03	3.25	1.17	7.42	2.05	6.17	2.92	2.13	1.5	2.49	0.52	0.38	1.34	0.81	2.08	1.11	3.28	0.69	1.76	1.14	0.31	2.19	2.58	21.77	2.54	1.87	1.11	1.12	1.31	9.65	9.91	1.34	3.56	1.41
ADGRG4	0	0	0.08	0	0	0	0	0.1	0.01	0.03	0	0	0.16	0.04	0.04	0.02	0.02	0	0	0	0	0	0	0	0.04	0	0	0.07	1.63	0.18	0.01	0.06	0	0.03	0	0	0	0.14	0.01	0	0	0	0.01	1.51	0.12	0	0	0	0.01
ADGRG5	3.66	5.27	3.7	2	2.83	3.77	3.23	8.2	10.99	1.83	3.54	9.06	3.07	3.56	6.39	4.14	9.37	3.14	7.05	4.24	6.44	16.41	6.82	2.9	5.51	0.54	3.17	14.34	5.57	10.09	11.55	7.31	3.32	11.64	2.23	6.24	6.63	14.26	3.34	2.13	5.85	5.16	7.32	10.49	4.88	7.52	10.6	15.5	9.83
ADGRG6	1.38	7.73	61.45	82.94	21.54	47.3	1.85	24.48	34.09	24.36	53.24	7.47	15.19	1.04	13.57	28.77	18.73	17.52	5.17	6.82	10.89	10.69	13.66	23.29	24.81	0.47	14.92	10.23	20.22	17.51	10.88	15.48	9.51	6.01	35.04	8.03	6.35	7.07	30.15	37.25	17.57	22.68	10.45	15.75	1.21	6.01	5.69	105.44	15.65
ADGRG7	12.82	3.36	27.56	12.16	7.86	0.09	0	15.02	0.78	11.27	34.87	1.46	2.94	0.79	16.09	11.61	2.43	0.07	0.25	0.87	21.48	0.28	12.88	0	0.15	0.1	7.65	0.3	50.47	17.01	0.63	10	43.9	18.82	0	0.81	0.94	9.52	11.24	0.57	10.29	1.23	4.15	90.61	2.11	0.21	44.17	2	0.1
ADGRL1	5.34	7.44	6.12	3.21	12.31	16.63	6.71	20.94	19.14	11.24	5.24	9.05	18.9	7.99	9.27	3.53	10.73	6.98	8.2	9.48	13.62	27.54	13.98	8.62	17.33	1.27	17.22	5.63	7.78	18.13	7.22	9.57	10.27	27.01	10.31	22.45	5.68	9.1	11.46	2.36	59.16	5.82	44.08	13.87	55.86	41.43	12.17	25.22	28.16
ADGRL2	7.18	4.21	7.53	6.47	13.21	4.41	14.47	13.88	10.59	48.19	8.19	8.46	11.72	25.43	26.46	23.63	10.7	35.56	3.54	15.34	10.82	2.82	8.69	15.36	1.95	7.39	1.9	6.7	4.41	3.94	8.15	8.02	2.4	10.68	20.48	10.37	14.39	11.25	37.89	30.06	4.29	6.27	2.61	7.69	37.05	7.13	8.71	16.47	4.32
ADGRL3	0.79	0.48	1.35	0.8	0.74	0.18	18.58	1.86	2.36	1.58	0.29	2.98	0.23	0.72	5.67	2	2.17	0.87	0.19	0.82	2.16	0.12	1.59	1.53	0.14	3.27	0.88	2.39	3.91	1.32	2.64	2.27	0.69	1.23	11.99	1.06	1.13	0.79	5.61	0.96	0.93	1.59	0.04	1.15	1.95	10.83	0.1	1.47	1.11
ADGRL3-AS1	0	0	0	0	0	0	0	0	0	0	0	0	0	0	0	0	0	0	0	0	0	0	0	0	0	0	0	0	0	0	0	0	0	0	0.19	0	0	0	0	0	0	0	0	0	0	0.17	0	0	0
ADGRL4	9.88	6.45	6.63	8.03	13.92	9.92	23.08	18.67	15.41	53.93	15.17	10.54	22.89	42.34	31.52	25.77	9.12	14.73	13.1	25.59	16.72	5.68	10.88	10.33	4.52	7.95	3.69	3.98	5.09	5.31	7.29	8.37	5.05	12.45	3.52	5.9	13.18	14.18	45.37	4.78	4.46	10.74	4.97	6.1	19.99	7.12	15.26	18.36	4.78
ADGRV1	0	0.01	0.91	0.89	0.07	0.02	0.03	0.42	1.23	0.02	0.48	0.3	0.01	1.4	0.23	0.45	0.05	0.14	0.06	0.09	0	0.31	0.01	0.3	0.03	0.01	0	0.06	0.05	0.21	0.11	0.02	0.05	0.06	1.6	0.18	0.16	0.01	0.02	3.12	0.49	0.24	0.01	0.2	0.59	0.05	0.13	3.14	0.07
ADH1A	0	0.11	0	0	0.88	0	0	0.04	0.13	2.98	0.06	0.05	2.7	0.75	0.12	6.93	0.18	0.16	0	0	2.68	0	0.1	0	0	0.06	3.92	0.17	2.09	0.44	0	4.09	1.92	0.18	0.24	0.08	149.14	1.1	1.31	0	0.09	0.19	0	0.06	0.61	0	0.35	0.08	0.33
ADH1B	0.71	8.92	0.77	0.96	1.07	0.05	0.14	18.78	9.17	136.51	4.63	2.96	0.76	1.1	85.2	15.75	13.78	37.51	1.3	21.81	44.36	2.66	39.39	4.32	2.34	0.51	13.43	32.54	44.88	11.3	15.97	7.31	2.15	9.48	3.28	0.71	24.36	143.25	2.19	0.17	3.45	17.88	0.02	0.56	5.26	0.33	1.34	6.74	0.86
ADH1C	8.31	52.17	11.47	1.82	222.02	2.72	0.18	29.67	97.87	392.34	2.75	20.89	61.88	4.72	333.77	34.78	166.32	23.73	58.55	57.37	160.49	3.78	22.61	0.48	0.06	0.94	480.4	378.58	320.32	174.22	410.77	153.74	51.31	36.06	34.91	284.06	116.02	5.68	513.82	0.07	59.33	321.83	0	31.33	12.84	3.71	224.75	1.77	2.56
ADH4	0.76	0.2	0.33	0.08	6.8	0.06	1.78	5.67	1.01	35.44	1.01	0.24	3.12	1.4	7.3	5.94	1.11	0.57	0.9	0.2	329.86	0.07	0.35	0	0	0.08	0.22	0.61	123.11	12.37	0.38	32.98	4.16	2.15	0.69	2.02	2.96	4.32	10.89	0.06	0.18	0.27	0.07	4.23	2.46	0.73	0.8	0.41	0.98
ADH5	81.32	43.04	72.5	116.06	145.64	103.31	73.41	99.81	91.75	150.16	117.07	97.53	137.11	84.1	109.06	67.09	47.84	57.14	52.37	61.76	115.8	101.3	71.73	55.76	48.14	99.41	110.79	38.57	69.78	74.23	45.24	30.16	70.95	38.66	86.87	151.32	92.48	68.37	89.37	76.75	34.08	65.14	36.53	57.42	52.22	101.97	72.74	105.35	68.5
ADH6	2.37	5.59	0.79	3.53	74.87	0	3.07	1.83	0.76	20.73	6.47	6.1	19.93	23.09	6.77	8.68	0.51	5.58	30.82	8.61	52.17	2.3	8.74	0.03	0.04	0.18	4.25	0.25	61.09	8.04	0.58	12.91	8.38	4.57	8.53	29.87	96.97	11.49	25.01	0.7	3.6	4.67	1.35	23.51	8.74	3.27	8.88	0.43	4.33
ADH7	0.22	0.2	0	0	0.26	0	0.18	0	4.02	0	0	0.06	0	0	32.88	14.07	3.64	258.8	0.45	0.1	0	0.03	0.57	0	0	0.18	0.03	32.24	0	0.2	41.2	0.97	0.42	0.05	0	0	0.05	0	0	0	0	0.06	0	0	0	0.22	0.05	0	0.05
ADHFE1	0.16	0.7	1.3	0.24	0.29	0.49	0.36	1.19	8.13	1.52	0.31	0.14	0.58	1.42	6.92	4.05	2.44	2.73	0.42	3.13	0.32	0.29	0.86	0.67	0.17	0.22	0.29	6.99	1.24	2.82	4.91	0.68	0.24	0.49	2.35	0.48	1.45	1.44	0.46	0.48	0.19	3.27	0.21	0.09	0.33	0.4	0.78	0.88	0.15
ADI1	61.91	101.88	101.01	90.71	108.11	112.02	89.41	92.35	162.25	103.95	146.22	143.38	189.45	90.38	133.7	126.03	89.17	83	159.35	96.63	148.29	138.69	138.75	154.77	44.04	92.6	131.07	85.21	112.34	155.28	127.77	119.2	99.12	116.34	141	136.07	226.97	108.73	102.44	68.77	219.88	163.86	124.9	154.89	75.83	113.9	93.57	83.52	115.35
ADIG	0	0	0	0	0	0	0	0	0	0	0	0	0	0	0	0	0	0	0	0	0	0	0	0	0.09	0	0	0	0	0	0	0	0	0	0	0	0	0	0	0	0	0	0	0	0	0.11	0	0	0
ADIPOQ	0.03	0.03	0.39	0.22	0.15	0.39	0.53	0.13	0.11	0.21	0.39	0.66	0.05	0.13	0.42	0.34	0.48	0.13	0.17	0.02	0.04	0.04	0.42	0.06	0.74	0.05	0.11	0.2	0.42	0.01	0.14	0	0.09	0.11	0.28	0.09	0.09	4.03	0.13	0.04	0.15	0.05	0.2	0.13	0.22	0.09	0.13	0.37	0.4
ADIPOQ-AS1	0	0	0	0	0	0	0	0	0	0	0	0	0	0	0	0.08	0	0	0	0	0	0	0	0	0	0	0	0.07	0.01	0	0	0.03	0	0	0	0	0	0	0	0	0	0	0	0	0	0	0	0.1	0.03
ADIPOR1	221.35	217.57	174.51	146.11	160.5	196.55	252.4	182.16	371.41	189.99	234.1	159.63	155.52	131.83	182.42	211.13	171.97	248.97	140.59	155.15	143.29	143.91	109.18	162.78	107.2	294.97	169.76	132.58	101.07	162.82	152.88	145.99	105.28	174.65	168.07	212.99	262.32	140.68	151.54	221.45	276.86	266.52	253.39	194.04	313.74	445.59	236.66	177.59	155.51
ADIPOR2	57.83	39.19	69.2	74.61	40.16	60.19	54.93	87.31	86.26	40.88	66.15	57.68	41.9	64.6	65.77	52.97	48.56	52.58	28.27	34.57	40.32	36.47	41.9	17.61	53.59	26.32	44.66	38.1	51.91	23.15	45.35	37.14	24.04	37.05	26.55	42.67	33.14	25.21	35.24	48.72	56.98	25.05	46.07	53.58	32.17	21.69	30.82	48.37	47.73
ADIRF	23.77	231.24	82.64	59.33	6.7	262.45	62.36	17.43	25.36	70.25	29.46	15.12	83.34	205.19	91.83	108.31	95.32	138.26	17.03	111.9	140.85	57.54	90.44	39.95	677.55	15.55	78.01	132.11	1427.3	252.89	116.52	142.84	7.06	156.2	48.25	60.52	88.78	194.87	122.57	15.94	24.52	39.52	28.13	14.77	46.06	16.42	11.84	11.24	1.88
ADK	39.43	19	28.01	60.24	36	93.19	40.74	90.51	37.85	22.92	45.08	38.18	39.77	23.55	35.94	37.61	22.33	53.75	15.31	19.14	18.82	16.55	24.58	24.42	42.54	35.73	35.5	13.23	16.24	43.55	13.08	12.37	27	26.43	43.65	62.65	25.16	21.79	25.45	74.73	43.47	14.21	5.29	26.38	18.85	28.07	36.37	47.77	44.62
ADM	21.86	37	47.72	46.03	31.42	38.01	5.12	17.9	10.77	30.94	36.34	24.8	11.42	73.08	14.16	22.84	8.87	139.03	78.46	12.12	27.97	20.32	10.48	89.25	53.25	67	2.71	16.02	10.56	12.3	18.35	88.06	15.03	17.12	7.08	17.21	15.29	42.02	23.58	103.23	19.79	5.43	26.07	8.4	17.44	18.28	7.35	25.88	2.77
ADM2	8.48	2.36	4.82	6.89	20.2	3.58	14.09	3.36	2.46	4.65	3.38	4.51	3.73	15.36	6.24	1.94	11.24	4.95	24.69	5.49	4.23	8.32	19.64	11.59	2.4	1.52	0.75	12.11	5.33	7.78	6.9	8.16	0.41	9.21	4.77	52.66	39.9	8.84	7.29	2.69	6.97	21.1	14.55	21.6	5.86	7.44	0.86	3.87	0.5
ADM5	0.27	1.33	0.57	1.2	1.14	2.59	3.89	1.06	1.97	2.58	0.71	0.38	1.21	1.33	1.33	0.54	1.25	2.23	0.67	2.86	0.62	1.17	3.38	1.97	1.64	0.58	2.49	0.23	0.32	0.56	0.89	0.56	3.15	1.35	1.43	0.6	1.21	5.06	1.54	1.7	1.97	0.56	0.32	0.72	2.5	2.86	2.43	3.77	3.54
ADNP	88.27	23.33	77.09	58.05	48.33	65.06	183.91	61.79	67.45	47.38	46.33	75.45	74.36	71.45	68.07	59.09	26.96	32.72	50.03	23.72	28.67	29.17	33.7	18.64	26.58	64.15	50.84	19.34	16.33	48.05	18.91	16.68	33.74	34.84	44.3	53.53	38.88	21.33	36.67	39.08	58.86	32.93	67.29	63.34	30.28	113.46	43.74	78.57	118.69
ADNP-AS1	2.64	1.35	6.15	2.95	1.56	2.08	7.77	4.12	4.23	3.55	1.28	4.04	7.43	3.65	3.94	2.56	0.56	0.61	4.42	1.07	1.29	1.06	0.53	0.31	1.21	2.27	1.3	0.55	0.68	4.29	1.15	0.54	1.07	1.77	2.24	1.85	1.47	0.56	1.01	1.18	3.09	1.09	3.16	2.32	0.91	3.08	3.31	2.16	1.77
ADNP2	18.87	14.27	11.2	7.09	17.71	32.15	15.22	15.54	45	16.53	21.29	19.37	11.84	15.99	14.6	19.06	10.22	17.03	6.68	8.55	14.06	17.79	10.4	11.08	10.52	24.91	17.75	6.18	8.26	10.44	6.34	6.18	6.26	9.59	9.95	16.03	13.15	8.13	13.23	10.36	6.73	10.67	26.95	12.62	11.94	42.43	9.93	26.4	14.77
ADO	17.11	19.9	16.57	13.35	19.59	22.9	55.21	29.43	28.66	20.86	21.58	15.97	21.55	16.34	22.42	32.07	11.69	17.92	11.61	16.38	20.58	28.33	13.56	22.98	18.98	53.39	22.97	9.14	11.78	21.93	12.14	13.14	19.9	16.81	25.96	11.56	16.55	19.17	22.74	19.62	24.01	17.32	17.91	20.68	20.72	29.04	23.47	41.16	28.61
ADORA1	0.22	1.64	0.79	0.32	1.8	0.24	0.38	1.27	1.6	4.62	0.99	0.07	0.29	1.12	0.89	0.36	1.91	0.62	1.1	3.12	1.19	1.11	4.07	0.85	1.31	0.26	1.55	1.35	0.72	2.58	1.22	0.86	1.65	3.16	1.34	2.1	3.52	6.68	4.26	1.84	2.74	1.21	0.26	2.96	4.44	1.87	2.87	4.75	2.56
ADORA2A	1.27	3.18	0.83	1.37	2.33	0.31	0.15	0.65	0	0.82	0.83	0.25	2.71	0.45	0.14	0.7	9.56	1.28	7.18	6.11	6.12	10.07	16.62	3.07	2.69	4.7	0	21.86	3.97	8.19	17.37	5.98	4.29	7.26	1.41	9.06	7.33	21.56	7.3	1.06	1.01	6.73	1.69	0.29	44.3	0.21	7.84	1.03	1.16
ADORA2A-AS1	0.32	0.15	0.23	0.1	0.25	0.49	0	0.13	0.25	0.18	0.08	0.31	0.23	0.27	0.34	0.26	0.07	0.06	0.98	0.09	0.08	0.12	7.36	0	0.05	0.11	0	0.09	1.13	1.08	0.04	0.15	0	0.05	0.03	1.37	0.08	0.14	0.27	0.17	0.36	0.83	0.08	1.03	4.71	0.34	0.17	0.43	0.09
ADORA2B	10.76	17.01	4.33	12.93	6.26	25.82	4	2.13	6.01	6.39	2.24	11.87	0.75	3.72	1.41	5.51	6.94	14.35	5.62	4.48	6.13	11.35	1.38	24.5	28.86	0.84	11.41	1.29	0.27	1.68	0.56	3.31	4.27	6.64	9.83	1	0.47	1.87	9.58	14.91	3.16	9.02	16.42	4.87	1.98	6.71	4.88	5.46	42.97
ADORA3	2.11	6.3	2.96	8.35	2.97	2.02	6.91	4.25	3.88	14.49	23.73	2.28	6.62	2.58	15.2	9.67	1.88	1.68	5.28	2.59	3.98	12.83	4.96	3.19	1.78	0.8	0.19	1.59	1.83	2.31	2.19	3.22	9.94	3.34	4.16	4.41	14.68	16.66	3.55	6.66	1.76	0.61	0.62	3.64	9.47	1.09	15.33	2.11	1.09
ADPGK	36.82	42.34	55.02	63.82	49.25	66.04	42.86	71.41	49.48	53.23	63.36	44.37	51.79	38.06	57.04	75.3	36.98	29.07	32.91	51.77	40.66	60.71	32.37	41.31	30.79	54.74	42.04	22.9	15.2	25.31	22.76	28.45	34.18	32.1	26.71	37.91	39.64	41.12	43.2	74.17	64.29	24.16	58.59	55.98	30.05	89.11	62.86	53.12	36.43
ADPGK-AS1	0.04	0.39	0.27	0.13	0.2	0.18	0.26	0.59	0.13	0.45	0.44	0.42	0.19	0.17	0.29	0.28	0.08	0.02	0.22	0.23	0.3	0.33	0.31	0.18	0.22	0.2	0.16	0.38	0.39	0.12	0.06	0.28	0.36	0.24	0.1	0.2	0.27	0.35	0.42	0.11	0.1	0.12	0.21	0.21	0.21	0.61	0.78	0.88	0.28
ADPRH	3.3	4.27	4.46	3.85	4.54	2.43	3.1	6.11	5.9	13.41	6.15	2.85	4.44	6.52	7.67	9.63	4.61	4.46	3.1	7.07	4.33	6.23	4.65	4.27	4.3	6.4	0.92	6.26	2.41	5.55	4.46	3.47	3.27	4.47	3.08	24.89	11.75	10.85	9.36	10.39	5.74	3.43	1.95	7.32	7.99	6.68	9.96	13.62	1.33
ADPRHL1	8.02	3.7	1.92	4.24	5.99	3.96	16.26	5.18	4.87	4.02	3.46	3.34	14.41	2.49	6.14	5.17	3.21	3.63	4.12	13.69	10.97	7.78	5.24	2.48	2.49	36.2	3.98	1.93	7.02	9.34	4.62	3.08	4.89	6.71	23.26	3.93	6.74	5.04	8.5	2.32	11.53	35.79	13.21	16.24	28.58	20.93	1.99	4.13	3.98
ADPRHL2	16.92	47.1	20.45	38.83	48.58	22.41	28.16	24.52	20.45	20.92	28.8	15.36	21.45	20.15	17.29	21.89	30.38	47.46	45.87	26.48	41.5	69.22	30.36	39.63	31.21	21.27	37.8	17.65	24.67	46.15	23.56	22.59	44.82	48.19	29.47	66.88	34.42	37.85	34.08	50.13	26.56	43.38	37.29	37.28	37.61	30.6	31.03	40.97	24.74
ADPRM	6.49	5.16	8.21	8.28	8.16	12.59	6.59	11.47	22.29	12.32	12.61	9.02	10.5	15.85	13.98	13.72	5.69	7.68	2.95	4.95	8.1	6.89	9.68	7.34	9.67	3.55	7.24	7.62	7.37	5.42	7.5	5.54	8.17	7.39	7.43	3.66	4.25	8.7	6.57	6.77	7.73	4.22	7.53	8.42	4.28	4.44	7.24	11.07	11.92
ADRA1A	0.79	0.35	3.33	0.72	0.59	3.44	3.81	0.98	1.06	0.86	0.27	4.14	1.42	0.5	1.24	3.1	0.71	0.46	0.46	0.87	0.53	0.42	0.75	0.26	0.34	0.32	0.58	1.17	0.36	0.42	0.76	0.96	0.35	0.46	0.18	0.28	0.62	0.79	0.98	0.16	0.38	0.18	0.67	0.41	0.65	0.44	0.48	1.09	0.92
ADRA1B	0.23	0.24	0.5	0.81	0.41	0.08	2.73	0.18	0.13	0.11	0.13	0.32	0.43	0.45	0.12	0.11	0.04	0.05	0.3	0.74	0.09	0.12	0.49	0.08	0.17	1.48	0	0.32	0.52	0.1	0.3	0.33	0.1	0.08	1.62	0.11	0.34	0.37	0.82	0.12	0.21	0.08	0.59	0.18	1.35	0.22	0.12	0.38	0.12
ADRA1D	2.71	0.12	0.62	0.39	0.12	0.07	0.67	0.23	0.41	0.72	0.07	0.2	0.28	0.87	0.85	0.26	1.25	0.44	85.29	1.01	0.13	0.43	0.32	0.2	0.44	0.06	0.05	0	0.5	0.81	0.03	0.2	0.06	1.01	0.53	0.34	0.21	0.88	1.92	1.22	2.21	9.14	5.15	0.63	0.72	0.47	0.3	0.34	0.18
ADRA2A	2.58	9.38	0.81	0.46	57	2.36	1.81	2.59	5.63	49.94	1.55	0.55	31.92	10.84	81	6.5	15.23	9.45	77.38	50.87	98.98	1.6	3.92	3.27	0.8	0.33	0.52	9.99	17.69	71.16	12.5	14.12	0.24	76.85	16.61	1.53	19.82	19.95	59.17	1.37	26.46	19.24	32.08	95.53	14.81	1.04	1.39	5.21	0.4
ADRA2B	0.06	0.66	0.33	0.22	3.15	0.07	0.85	0.17	0.98	0.49	0.17	0.43	0.73	0.56	0.81	0.91	0.21	0.15	5.19	0.56	0.32	0.52	0.5	0.76	0.19	1.75	0.37	0.28	0.15	0.86	0.59	0.25	0.22	0.3	0.38	0.14	0.47	0.61	0.43	0.35	0.16	5.94	0.16	0.17	1.05	2.1	0.28	0.54	0.09
ADRA2C	0.05	1.93	0.28	0.67	0.78	0.38	2.7	3.58	0.72	1.45	0.52	0.66	0.03	5.98	0.38	35.13	0.89	3.23	1.55	4.09	3.08	4.14	1.85	5.25	3.07	54.05	0.19	1.11	0.6	0.73	0.54	2.79	0.42	1.33	11.23	97.08	19.75	4.27	1.92	0.06	0.19	1.12	0.34	1.76	1.04	240.15	0.53	8.8	0.25
ADRB1	0.02	0.46	1.74	0.6	6.23	0.38	0.62	3.76	0.42	0.08	0.07	3.85	0.26	0.75	0.79	3.67	0.25	0.97	0.47	0.66	0.19	0.66	1.07	0.69	0.35	9.78	0.11	1.25	0.87	1.87	0.62	0.33	0.36	0.44	1.2	0.48	0.96	0.84	0.13	0.74	7.6	1.24	0.09	0.55	1.79	8.48	0.6	1.55	0.66
ADRB2	0.35	1.37	0.87	0.7	1.01	0.6	0.48	1.54	1.83	4.23	1.25	0.39	0.71	0.92	9.83	6.62	12.82	19.91	1.47	0.98	2.7	1.54	3.06	3.44	0.53	0.48	0.45	10.79	1.88	5.72	11.28	2.6	1.56	2.09	1.03	0.91	2.88	7.28	1.82	0.61	0.38	1.18	0.13	0.74	1.67	0.7	1.43	2.29	0.21
ADRB3	0.02	0.15	0.02	0.02	0.1	0.02	0	0.04	0.24	0.09	0.02	0.05	0.15	0.23	0.29	0.05	0.13	0.09	0	2.6	0.02	0.08	0.06	0.17	0.06	0.03	0.07	0.09	0.75	0.11	0.33	0.12	0	0.35	0.13	0.02	0.04	0.03	0.25	0.23	0.02	0	0.05	0.16	0.16	0.02	0.12	0.23	0.06
ADRBK1	86.41	97.06	112.43	106.47	159.27	64.7	85.98	115.45	77.41	82.71	64.43	98.8	54.02	57.58	98.07	60.17	134.33	103.03	134.13	103.71	143.32	137.23	101.61	50.48	203.07	144.24	124.66	92.27	68.21	100.1	73.06	88.13	65.31	104.48	121.51	107.99	89.52	150.24	106.43	130.68	163.01	180.22	155.43	93.55	177.35	105.88	87.56	87.86	105.37
ADRBK2	12.7	1.92	6.71	3.68	3.72	3.99	6.36	4.33	2.91	10.18	3.99	1.62	3.11	3.93	7.7	5.57	3.4	3.5	8.23	3.7	2.28	3.62	6.15	4.04	1.17	3.63	1.68	5.31	2.93	4.38	2.92	3.15	4.16	1.98	2.03	6.74	4.13	6.53	3.93	0.97	5.88	3.42	10.78	7.15	12.32	3.41	6.49	11.86	2.94
ADRM1	199.85	276.99	336.68	280.93	218	77.42	343.11	168.58	95.81	85.81	93	188.14	107.17	188.86	188.02	141.35	226.45	160.71	500.98	242.91	201.38	273.71	223.49	147.09	418.18	210.06	398.71	122.72	109.08	272	140.89	291.02	253.89	421.69	274.89	341.99	192.59	196.3	176.36	290.52	210.58	210.03	475.57	200.15	154.44	243.84	236.21	234.85	271.97
ADSL	166.93	59.53	79.02	197.54	43.86	114.94	85.93	64.34	50.13	77.19	96.16	104.13	81.11	115.71	66.56	66.43	53.47	46.37	60.02	66.1	81.8	60.69	50.93	57.96	58.36	63.84	62.78	28.86	31.02	53.42	31.56	33.15	51.31	59.78	45.13	96.69	70.58	70.29	58.64	50.03	149.36	85.05	72.6	105.41	60.26	64.61	52.44	121.45	70.08
ADSS	64.41	39.53	56.68	56.46	46.77	59.54	43.78	45.29	66.41	50.73	48.92	47.16	75.44	44.89	45.15	58.61	34.67	35.75	26.2	30.83	34.48	40.92	31.69	33.47	25.53	28.53	39.07	17.48	18.91	32.69	29.78	15.52	43.41	37.54	52.71	53.71	44.83	20.22	51.31	50.58	80.07	52.79	41.44	58.46	22.86	117.03	43.36	46.09	52.08
ADSSL1	1.57	2.67	1.76	8.42	2.33	1.63	2.58	18.2	13.07	4.78	3.79	3.03	1.14	29.17	8.2	3.56	4.02	15.9	17.63	2.67	1.97	20.34	2.02	1.71	1.57	17.72	0.8	7.84	3.46	25.42	5.24	2.38	1.28	3.32	3.58	10.15	3.93	5.31	4.2	1.99	35	11.14	0.69	3.38	4.79	3.66	4.53	9.42	0.6
ADTRP	77.81	5.19	1.9	14.19	43.76	0.41	0.34	3.08	7.22	7.69	15.33	2	26.9	1.57	35.55	11.43	54.07	0.99	11.56	1.91	79.41	0.88	49.32	1.01	4.22	0.14	0.68	78.6	75.6	50.5	72.31	29.13	21.18	51.81	0.08	0.78	5.82	17.98	14.48	6.42	52.7	25.89	12.14	31.8	9.14	0.84	4.51	22.14	0.52
AEBP1	18.72	231.35	68.6	39.85	302.49	56.08	70.31	140.47	122.68	324.08	173.92	23.09	23.08	156.68	147.46	70.31	49.01	60.99	71.16	731.13	156.92	96.02	109.62	58.06	313.43	67.18	24.72	51.39	71.73	44.33	60.97	62.94	105.44	163.18	213.29	281.6	481.38	629.62	407.07	527.54	66.51	102.84	37.48	212.24	500.5	96.44	221.33	447.67	44.68
AEBP2	12.89	9.5	18.69	20.48	10.15	25.62	17.24	28.28	36.46	15.39	17.57	24.38	14.55	14.95	16.17	14.03	6.56	16.38	7.83	10.32	8.59	9.54	26.08	9.55	14.48	8.15	11.33	6.79	5.49	6.55	6.38	6.53	10.96	10.19	23.73	15.94	10.49	7.45	13.42	13.95	16.54	11.31	7.54	17.25	8.14	9.62	17.66	25.25	25.35
AEN	16.25	37.3	18.12	27.39	21.55	22.44	44.9	76.09	15.22	13.56	22.67	18.07	10.98	16.34	17.81	26.08	26.15	20.83	15.39	44.56	25.91	24.17	29.75	21.89	16.35	41.33	25.94	11.26	8.86	34.04	10.89	19.15	22.34	21.25	42.42	22.37	13.8	15.92	27.27	34.73	30.1	14.83	49.95	19.36	15.49	25.32	49.86	32.9	62.07
AES	138.84	532.12	171.34	176.54	423.84	181.81	274.67	206.52	206.16	334.89	207.38	154.42	258.51	183.29	278.79	279.4	423.47	520.41	410.56	651.26	444.44	498.85	482.04	563.61	415.23	521.75	476.07	480.9	422.28	308.91	586.42	481.2	391.96	331.64	771.99	318.84	747.76	478.2	491.11	238.68	352.97	387.64	383.38	190.24	360.8	362.71	412.83	292.33	432.38
AFAP1	15.32	5.93	16.86	12.96	44.08	12.96	31.14	19.22	9.61	43.42	12.78	18.14	7.4	39.86	22.46	15.48	12.46	15.41	6.88	23.47	17.99	14.84	22.04	10.85	27.54	6.23	5.42	7.5	7.96	11.61	8.9	10.86	12	20.34	19.25	14.21	17.92	26.49	46.35	28.72	23.69	11.76	3.99	24.21	25.45	19.26	22.71	43.52	23.81
AFAP1-AS1	1.54	1.47	30.89	57.38	0.27	120.32	0.1	0.15	28.96	15.72	2.12	1.77	28.61	0.23	5.92	0.8	45.41	4.46	0.67	8.74	0.05	90.95	88.38	10.97	34.94	0.07	90.77	1.39	2.18	7.57	4.64	17.43	0.04	11.89	12.08	0.03	3.39	12.32	28.83	0.26	0.18	9.98	0.02	13.89	0.18	40.95	0.26	0.13	0.16
AFAP1L1	2.32	4.18	3.12	4.03	6.46	2.58	11.26	5.85	3.91	12.96	2.98	4.09	5.53	13.06	5.52	5.11	1.8	4.59	4	12.12	5.61	2.18	4.47	1.73	2.57	3.52	1.53	1.67	0.89	3.29	2.36	3.25	1.58	6.5	3.69	3.36	4.74	7.7	14.47	2.86	4.26	5.77	1.84	3.51	8.56	3.01	6.22	13.93	1.73
AFAP1L2	2.81	7.03	9.68	9.44	7.77	9.46	5.05	4.01	7.31	22.92	5.51	4.41	5.95	6.36	8.38	19.95	6.8	13.07	6.11	13.73	4.76	84.49	17.27	7.31	29.78	8.67	4.16	3.87	3.96	10.56	4.24	6.66	3.49	8.6	27.82	8.28	5.32	7.8	25.88	25.27	10.1	4.58	4.82	8.87	5.33	7.28	6.61	11.09	3.93
AFF1	16.85	10.08	32.54	22.94	34.67	30.83	30.24	28.19	23.31	43.4	24.9	27.21	30.31	36.03	36.63	26.74	18.28	26.03	12.39	15.75	9.36	10.72	18.22	11.87	12.2	24.99	20.8	16.84	14.61	15.62	15.3	13.4	14.79	12.65	15.29	22.78	15.75	16.04	21.66	27.24	23.21	8.53	12.65	29.38	18.51	20.67	14.95	36.35	11.87
AFF2	0.07	0.04	0.06	0.02	2.85	0.03	0.19	0.15	0.82	0.32	0.14	0.06	0.06	1.28	0.19	0.34	0.24	0.13	0.09	0.2	0.14	0.02	0.29	0.27	0.05	0.05	0	0.56	0.13	0.21	0.34	0.14	0.02	0.16	0.01	0.05	0.52	0.31	0.14	0.03	0.03	0.22	0.45	0.56	0.34	0.01	0.12	0.45	0.08
AFF3	0.2	0.38	0.65	0.18	0.29	0.16	0.34	0.93	0.88	1.04	0.2	0.35	0.22	0.71	3.37	1.33	2.06	1.6	0.17	1.18	0.53	0.31	1.77	0.16	0.18	2.83	0.32	4.98	1.87	1.9	2.11	0.9	0.18	0.8	0.3	0.55	2.47	4.86	3.32	0.25	0.22	0.5	0.07	0.55	0.75	0.67	0.63	1.03	0.28
AFF4	29.13	18.58	37.88	37.51	35.04	56.42	25.8	37.86	57.81	62.25	48.06	28.42	42.93	54.67	58.31	55.69	26.85	44.34	9.95	16.4	19.2	14.39	18.31	18.9	14.78	19.56	13.64	16.87	17.82	37	18.09	18.88	19.07	21.48	38.59	26.24	22.03	14.95	35.19	26.35	22.19	7.44	28.82	31.33	22.65	37.12	19.34	49.87	25.69
AFG3L1P	9.17	5.09	11.62	17.95	9.97	13.64	8.4	7.36	17.59	10.7	9.62	16.19	14.23	7.37	10.17	14.53	5.85	6.13	9.11	4.9	6.94	7.18	7.45	5.3	4.54	4.15	9.56	5.43	3.75	4.12	3.86	3.63	5.42	8.82	9.64	3.94	5.32	3.88	5.74	7.86	9.99	2.6	16.92	10.09	2.59	6.42	7.22	14.54	10.12
AFG3L2	52.98	32.32	43	64.19	79.73	63.48	82.5	50.71	47.97	45.5	69.84	53.38	56.84	54.21	58.79	33.27	46.37	49.56	53.61	44.41	75.96	48.33	31.49	28.93	36.39	64.33	77.08	32.15	49.63	48.6	29.07	22.89	24.96	58.62	31.8	65.81	70.53	34.96	63.82	35.9	113.77	67.77	97.55	84.24	41.43	27.6	43.43	50.08	31.4
AFM	0	0	0	0.08	0	0	0	0.03	0	0	0.05	0	0	0	0.14	0	0.14	0	0.03	0	0	0	0	0.09	0	0	0	0.48	0	0.03	0.19	0	0	0.03	0	0.27	0.21	0	0	0	0	0	0	0	0	0	1.45	0	0.03
AFMID	30.65	24.02	20.81	24.01	23.53	35.08	316.34	35.99	31.24	25.07	20.85	29.74	10.81	26.95	23.85	27.2	16.46	16.78	56.32	29.84	30.42	41.2	36.78	20.15	24.52	95.54	27.97	13.63	16.61	45.5	25.29	18.82	21.26	22.49	38.66	23.75	20.81	13.24	20.63	38.83	11.39	18.37	29.55	16.97	19.06	71.96	25.46	22.05	41.53
AFP	0.1	0.04	0.03	4.1	7.01	0.12	0.07	0.06	0	0.03	1.73	0.03	0	0.22	0.08	0	0.09	0.03	0	0.04	0	0	0	0.22	0	0.04	0.15	0.47	0.25	0.98	0	0	0.98	0.11	0.07	1.59	0.15	0	0	0	0	0	0	0.04	0.17	0	0.11	4.94	0.03
AFTPH	46.03	21.63	54.18	32.24	25.98	27.77	49.87	47.39	44.65	40.35	40.68	45.1	49.7	107.83	52.56	53.66	36.1	38.68	31.82	25.46	26.67	23.86	32.24	21.21	21.12	30.77	27.14	24.44	19.33	30.28	29.64	23.38	26.37	21.71	42.86	48.27	44.85	19.98	30.31	30.22	50.73	33.3	35.2	52.95	23.68	46.5	40.53	44.06	44.88
AGA	6.65	5.22	28.64	9.25	25.88	8.96	12.47	11.25	16.97	37.54	15	17.8	28.65	16.77	23.71	20.56	19.28	16.12	14.35	14.46	24.25	11.04	15.02	20.49	10.53	18.83	11.58	17.28	18.96	17.32	16.41	16.69	11.66	7.6	39.19	19.76	22.55	19.02	15.34	11.72	14.44	13.55	9.19	13.73	28.41	25.39	22.44	16.21	23.73
AGAP1	16.36	11.76	22.87	10.9	8.06	17.31	13.08	20.86	10.37	18.79	12.21	11.2	12.53	19.85	13.42	13.27	16.4	7.88	26.15	5.31	21.84	10.57	57.39	5.28	19.75	29.72	24.03	7.31	12	13.52	7.28	11.16	6.98	13.14	15.3	11.5	10.65	11.94	17.54	13.02	31.16	7.71	11.4	24.3	18.44	29.02	6.66	14.26	16.13
AGAP11	0.15	0.52	1.24	0.93	0.17	3.3	0.48	1.07	1.28	1.88	0.49	0.66	0.98	1.12	1.6	1.9	0.39	1.72	0.29	0.51	0.19	0.36	0.4	0	0.35	0.44	0.13	0.59	0.8	0.48	0.16	0.07	0.05	0.45	0.18	0.37	0.25	0.6	0.66	0.3	0.21	0.27	0.33	0.08	0.32	0.3	0.41	0.74	0.3
AGAP2	0.91	7.45	2.37	1.27	1.53	7.32	0.56	3.82	8.59	8.19	6.24	0.56	4.94	0.91	2.64	2.59	4.69	2.47	2.55	3.21	5.87	7.1	6.49	3.12	8.55	1.01	9.07	7.42	1.55	3.26	4.17	3.49	3.44	2.38	1.83	1.53	4.06	12.49	9.27	1.73	0.99	1.28	1.7	2.29	3.1	2.06	8.17	4.2	2.05
AGAP2-AS1	2.1	62.22	4.02	7.61	14.86	7.34	5.93	32.65	18.24	17.18	7.53	5.42	7.78	8.73	6.73	6.11	10.68	15.67	12.61	37.18	13.73	21.99	10.43	16.24	45.69	6.98	36.3	7.54	7.87	5.41	8.78	9.32	15.04	15.44	57.7	10.05	26.65	26.26	33.31	24.97	9.85	8.85	17.21	18.59	36.44	17.18	27	27.04	2.83
AGAP3	37.07	41.52	33.94	73.39	62.63	38.64	47.39	38.17	33.97	44.54	26.74	22.18	45.52	22.99	36.29	21.57	29.33	50.6	114.88	49.85	34.8	52.2	38.57	27.81	65.04	50.04	65.76	20.11	23.49	41.16	18.38	29.78	33.24	46.18	34.8	100.98	42.36	46.38	66.76	32.95	43.15	35.95	83.28	54.48	43.12	38.15	46.16	34.36	44.4
AGAP4	4.88	2.52	10.64	6.38	1.43	14.09	16.26	15.01	15.78	9.53	4.46	10.94	4.43	9.18	12.22	10.54	2.42	3.99	3.05	2.35	1.95	1.75	2.5	2.05	2.57	5.76	3.86	2.1	2	2.76	2.45	1.38	2.95	3.81	7.55	0.55	2.11	0.89	3.12	3.66	7.43	0.72	8.65	2.82	2.14	5.74	7.08	6.78	6.06
AGAP5	1.79	1.79	6.78	5.75	3.16	8.92	12.39	12.01	7.98	6.31	4.55	4.39	8.33	4.91	8.72	7.6	3.03	2.17	1.7	2.9	1.52	2.72	2.25	1.64	1.21	3.46	2.14	4.52	0.6	2.69	1.99	0.59	2.63	2.43	5.22	1.33	2.14	1.23	3.09	2.36	4.86	0.78	6.55	2.26	2.06	3.18	4.87	5.47	4.53
AGAP6	6.59	3.59	13.95	11.16	6.07	17.6	17.11	48.46	16.18	10.55	6.46	8.53	16.68	12.84	13.41	12.96	4.54	5.28	5.49	3.44	2.96	5.64	4.63	2.11	3.31	9.46	4.82	4.07	1.94	1.78	3.46	1.69	4.73	5.02	13.52	1.21	2.86	3.2	6.6	4.19	7.15	1.25	7.68	4.89	2.87	8.37	10.7	11.81	11.22
AGAP7P	0.5	0.83	0.95	7.52	0.61	2.69	1.21	1.14	3.16	1.9	1.5	0.74	5.38	2.57	1.22	2.4	1.18	0.51	0.3	0.48	0.76	0.81	0.8	0.31	0.4	0.57	0.57	0.74	0.41	0.08	0.51	0.1	0.19	1.32	1.83	0.61	0.86	1.97	1.19	0.29	0.66	0.33	0.87	1.81	0.17	0.27	1.37	4.66	1.88
AGAP9	4.83	3.17	8.5	12.66	7.71	9.37	15.8	12.76	21.67	12.55	1.68	5.15	3.3	10.63	9.69	20.49	4.83	4.84	2.67	3.53	3.29	3.62	2.64	1.77	2.97	2.47	4.33	3.18	3.98	2.98	3.46	2	4.39	4.71	12.22	1.51	2.02	2.12	3.55	3.26	9.21	1.11	7.51	3.05	1.7	4.08	8.64	7.31	13.2
AGBL1	0	0	0.05	0	0	0	0	0.06	0.03	0	0	0	0	0	0	0	0	0.03	0	0.11	0	0	0	0	0.02	0	0	0	0	0	0	0	0	0	0	0	0	0	0	0	0.03	0	0	0	0	0	0	0	0.02
AGBL1-AS1	0	0	0	0	0	0	0	0	0	0	0	0.08	0	0	0	0.16	0	0.14	0	0	0	0	0	0	0	0	0	0	0	0	0	0	0	0	0	0	0	0	0	0	0	0	0	0	0	0	0	0.14	0
AGBL2	0.11	0.36	0.83	0.36	0.24	0.2	5.98	1.26	0.33	0.62	0.23	0.76	1.5	0.53	0.81	1.92	0.2	0.33	0.78	0.14	0.35	0.46	0.49	0.15	0.2	0.27	0.17	0	0.32	0.38	0.1	0.06	0.3	0.19	0.37	1.81	0.15	0.21	0.19	2.17	0.72	0.22	0.31	1.05	0.02	0.41	0.56	1.01	1.46
AGBL3	0.2	0.12	0.15	0.29	0.53	0.38	0.04	0.3	0.32	0.35	0.15	0.31	0.44	0.4	0.29	0.54	0.13	0.13	0.36	0.24	0.21	0	0.22	0.32	0.18	0.11	0.32	0.07	0.33	0.26	0.29	0.12	0.33	0.08	0.4	0.42	0.39	0.19	0.28	1.08	0.12	0.18	0.44	0.49	0.36	0.68	0.34	0.19	0.32
AGBL4	0	0	0.16	0.03	0	0	0.07	0.47	0.54	0.06	0	0.31	0.06	0.4	0.09	0.69	0	0.06	0.2	0	0	0	0	0.27	0.02	0.16	0	0.08	0.06	0.25	0.05	0.04	0	0	0.13	0.44	0.07	0.07	0.02	0.02	0.08	0.31	0	0.22	1.04	0.02	0	0.45	0
AGBL4-IT1	0	0	0	0	0	0	0	0	0	0	0	0	0	0	0	0	0	0	0	0	0	0	0	0	0	0	0	0	0	0	0	0	0	0	0	0	0	0	0	0	0	0	0	0	0	0	0	0	0
AGBL5	24.91	26.93	21.05	24.87	19.08	19.06	53.96	25.67	42.54	16.83	11.66	27.93	17.14	15.63	35.95	29.59	16.2	18.19	29.52	25.27	19.78	18.44	13.02	8.24	34.19	60.68	33.19	16.93	11.94	37.64	17.01	8.53	17.83	26.75	17.37	55.48	30.3	15.44	18.4	54.4	18.67	26.07	22.6	45.34	25.33	35.27	15.41	29.37	29.45
AGBL5-AS1	0.39	0	0.47	0.19	0	0	0.29	0.64	0.22	0.23	0	0.26	0.23	0.57	0.22	0.76	0.29	0	0.41	0.27	0	0.23	0	0	0.52	0	0	0	0	0	0.25	0	0.5	0	0.9	0	0.35	0.67	0.21	0.38	0	0	0.22	0	0	0	0.41	0.43	0.41
AGER	1.03	2.15	2.68	2.64	2.05	3.42	5.4	2.3	4.53	2.73	1.28	3.25	2.6	1.85	2.7	2.76	2.9	1.44	3.64	1.07	1.03	2.43	3.85	0.97	1.13	1.79	1.94	2.86	1.21	0.78	1.1	0.65	1.68	1.71	1.33	0.51	1.13	1.66	2.02	1.74	1.6	0.67	4.63	2.05	0.72	4.47	1.99	3.85	2.23
AGFG1	43.38	20.96	41.61	50.35	34.85	25.26	56.1	39.89	22.58	39.78	47.47	24.27	31	53.65	28.12	38.62	29.81	29.56	20.14	16.72	20.15	17.81	17.06	20.05	15.32	17.6	25.99	12.95	20.71	26.67	12.45	20.45	24.42	16.67	22.31	41.62	33.71	15.05	27.8	18.15	32.39	21.52	16.8	41.43	17.14	40.75	25.95	35.19	43.7
AGFG2	12.73	11.87	10.13	10.88	25.7	1.9	26.84	6.17	14.59	6.94	9.65	12.97	6.18	11.79	8.68	10.3	14.15	31.68	30.92	16.69	20.03	13.18	7.79	4.12	6.39	73.46	21.16	10.81	13	26.75	9.79	14.28	21.46	26.36	8.15	18.31	19.13	11.41	15.22	25.07	39.22	28.44	24.29	31.65	24.61	22.21	13.18	12.51	39.15
AGGF1	31.13	15.26	18.59	12.46	26.29	28.69	54.71	17.82	32.75	30.91	34.56	16.93	36.87	26.65	31.8	22.04	16.21	16.24	7.63	15.51	18.49	16.14	11	10.48	8.41	17.51	14.37	9.97	13.87	11.84	11.81	9.13	12.42	16.93	19.46	23.23	17.32	11.74	23.06	16.24	12.68	12.38	11.41	22.02	16.73	14.1	14.92	29.4	19.43
AGK	33.83	11.41	18.99	54.47	24.67	29.08	35.52	23.49	27.57	21.38	21.43	22.77	38	22.49	27.6	19.71	17.42	14.92	21.35	15.04	7.27	18.29	21.85	21.18	18.84	45.18	27	15.27	7.2	14.58	12.2	9.17	9.86	20.23	13.01	13.12	18.13	14.17	9.95	3.08	16.28	16.95	32.12	18.87	11.1	31.26	16.87	23.77	16.37
AGL	12.82	4.49	10.64	10.36	8.96	28.92	9.44	14.58	16.63	16	19.89	12.26	16	11.22	17.65	15.36	9.47	11.82	5.16	4.58	7.71	6.59	4.97	7.01	3.21	5.37	16.83	5.45	5.03	7.08	4.26	4.48	6.27	6.73	6.62	9.67	7.38	5.2	11.43	9.56	19.92	6.84	6.62	18.41	6.08	16.49	6.77	14.48	14.15
AGMAT	47.71	20.92	14.72	40.64	17.79	18.13	5.56	43.02	4.5	7.22	43.38	20.72	23.62	5.76	16.76	13.97	15.91	5.2	40.86	9.93	56.84	6.72	19.19	7.32	5.61	8.01	38.22	8.26	35.9	25.77	5.3	16.53	16.35	61.76	3.65	39.36	30.8	23.08	20.87	11.61	41.36	16.7	55.25	46.09	8.61	14.28	41.04	22.29	25.07
AGMO	0.02	1.19	0.38	1.75	11.62	0.37	0.18	0.18	0.3	1	0.37	1.4	0.81	0.24	0.45	1.27	0.87	0.19	0.18	9.7	31.63	0.27	15.05	0.08	0.28	2.18	0.42	0.19	35.68	0.05	0.66	5.07	3.82	2.92	0.36	23.45	1.79	0.98	2.82	0.14	0.22	0.12	0.22	11.32	0.6	22.64	0.22	0.23	0.2
AGO1	12.54	10.1	18.27	17.27	15.35	15.13	22.78	30.76	22.02	22.69	13.78	21.65	19.7	18.43	30.53	14.23	12.1	10.05	15.04	8.59	18.38	11.68	13.14	5.16	7.97	18.47	17.1	9.82	8.46	17.29	8.98	5.55	9.29	13.95	5.7	23.61	12.8	14.03	16.16	12.52	16.05	19.51	10.46	43.95	18.38	35.33	17.3	26.77	16.04
AGO2	40.6	30.22	39.1	21.32	23.29	36.94	15.5	22.79	25.58	21.86	18.23	27.61	20.52	21.53	13.4	18.22	15.49	11.64	20.16	12.01	16.61	9.49	18.07	8.65	20.44	17.19	37.71	6.04	9.22	13.27	4.51	11.82	12.89	30.31	13.49	16.4	7.99	11.37	30.06	12.64	48.89	9.2	40.48	43.28	39.25	126.69	12.47	19.73	31.62
AGO3	7.75	5.02	8.1	7.9	6.71	10.04	7.62	9.77	8.67	11.32	9.08	12.97	7.04	10.26	10.77	10.76	4.76	4.79	6.34	2.92	3.28	5.25	4.81	3.73	3.35	4.73	3.93	3.73	2.78	5.25	2.17	2.56	4.24	4.24	3.67	7.52	4.67	4.04	6.44	6.3	6.53	4.85	4.45	10.82	7.35	15.98	6.52	15.69	6.6
AGO4	7.96	4.09	8.28	8.35	7.21	9.68	12.22	10.67	10.16	18.15	10.95	9.04	18.43	9.32	18.03	9.95	4.71	7.34	3.58	3.26	4.46	7.89	2.76	3.86	4.03	4.42	2.4	5.23	1.86	5.02	5.3	3.51	2.29	3.56	4.9	7.09	5.16	4.69	8.32	6.82	4.55	3.44	5.77	7.62	3.81	9.22	4.92	10.39	0.91
AGPAT1	86.69	102.69	79.6	130.13	144.82	85.88	185.74	56.92	252.04	144.06	89.91	68.1	99.58	120.96	123.23	104.16	117.53	62.34	100.6	136.05	105.43	76.74	70.32	123.3	79.25	256.92	86.46	81.96	128.61	149.22	106.14	82.66	74.19	102.92	88.42	128.77	153.68	132.56	107.4	157.7	105.31	165.78	565.31	197.16	226.43	219.88	95.43	116.03	60.61
AGPAT2	98.42	329.62	200.47	408.81	126.35	120.05	63.57	161	59.03	99.12	117.76	99.85	176.28	69.91	72.31	137.77	212.98	97.31	310.42	172.53	305.36	128.43	68.39	87.1	336.22	173.68	232.28	66.42	711.91	248.62	104.04	170.43	281.18	286.21	196.52	206.9	128.31	109.82	203.37	84.02	257.36	215.61	290.97	119.36	191.83	59.29	192.43	174.67	229.38
AGPAT3	46.25	23.51	15.72	15.19	50.67	39.47	46.78	26.53	29.49	37.38	32.38	24.3	18.74	25.54	30.86	24.23	36.42	32.85	57.53	27.65	50.92	46.47	28.27	24.5	29.01	22.55	41.1	25.07	38.49	54.01	31.3	22.14	33.05	43.91	22.51	103.57	35.29	30.83	43.8	20.64	30.36	25.3	56.27	63.76	49.42	60.12	51.57	42.51	43.9
AGPAT4	0.6	1.29	6.72	4.45	1.6	1.32	0.72	1.25	3.8	7.47	1.49	1.01	1.28	2.85	3.14	2.84	0.82	2.19	0.83	2.32	0.65	1.01	0.82	2.35	3.36	0.91	0.67	1.21	0.55	3.19	0.85	1.22	0.49	1.35	7.02	3.71	1.85	2.6	5.88	2.54	1.53	0.61	0.4	1.86	5.7	1.97	2.82	4.48	0.35
AGPAT4-IT1	0.03	0.04	1.65	3.18	0.23	1.1	0.25	0.19	1.05	1.85	0.29	0.99	0.31	1.02	0.79	1.24	0.1	0.64	0.13	0.48	0.08	0.15	0.14	0	0.26	0.13	0.03	0.26	0.36	0.26	0.12	0	0.04	0.13	0.41	0.13	0.14	0.08	0.74	0.22	0.1	0.06	0.18	0.05	0.47	0.74	0.74	0.74	0.15
AGPAT5	16.43	17.92	14.87	33.89	20.62	43.84	11.16	21.05	18.97	17.59	45.72	32.73	33.01	11.9	16.11	37.72	13.06	9.61	3.73	10.2	21.28	7.39	12.38	8.75	13.91	14.07	39.33	5.95	10.5	6.8	9.59	6.31	13.53	6.9	19.02	18.05	9.01	8.29	19.49	22.02	12.99	7.11	14.84	31.36	18.47	49.67	10.33	17.29	29.63
AGPAT6	16.9	14.18	10.21	22.28	35.67	36.81	23.9	15.95	25.87	38.28	18.95	22.45	31.88	16.08	22.3	19.15	24.21	13.69	22.89	22.08	27.76	23.55	23.34	14.52	68.19	37.61	45.28	14.24	10.83	27.65	18.59	11.61	15.81	14.21	43.39	24.74	17.53	18.73	43.29	26.96	14.81	22.66	17.34	26.38	31.07	50.55	26.74	25.12	29.03
AGPAT9	2.53	5.53	3.81	23.5	5.17	15.34	0.37	23.87	7.98	8.71	9.03	11.24	3.73	7.49	17	10.91	29.33	8.08	9.89	9.86	7.21	3.47	2.38	5.9	18.29	0.69	9.82	11.81	61.03	10.24	6.51	7.42	3.24	3.47	6.83	17.46	5.61	4.98	9.93	34.55	5	2.52	2.24	7.98	3	2.07	2.48	5.17	3.4
AGPS	19.96	10.47	29.6	43.9	10.6	29.1	18.02	27.81	31.21	35.62	42.82	27.53	25.31	25.25	26.03	22.94	17.89	13.48	14.45	10.37	9.85	11.46	9.95	12.42	9.87	8.59	15.76	5.9	8.88	9.59	6.82	6.85	13.44	11.63	20.93	17.74	14.46	12.99	33.25	18.99	15.94	10.52	18.47	36.01	13.49	21.7	14.84	24.1	26.06
AGR2	1336.4	3138.15	2696.16	2876.66	2717.38	6955.28	239.43	3295.3	6920.15	1410.74	3131.19	5237.9	3706.47	5329.66	2734.69	1468.92	8290.9	582.37	517.19	868.07	1528.9	251.24	965.95	5368.34	204.36	150.23	5409.43	2798.56	2095.32	996.4	2845.57	3797.54	2553.74	1299.59	1310.09	2048.96	959.13	701.46	1849.41	561.94	2137.91	3511.68	548.21	1833.16	819.56	465.4	908.76	21.51	1326.22
AGR3	127.46	174.85	116.73	60.59	130.83	317	0.7	261.61	596.98	380.27	247.14	850.11	947.54	79.16	191.32	169.72	272.44	26.68	39.2	5.32	235.37	5.16	30.36	105.16	0.31	7.43	110.96	67.77	350.84	51.45	104.93	212.81	39.25	129.27	93.93	220.51	56.62	52.6	159.39	19.51	189.44	22.11	3.82	404.53	23.35	7.01	10.32	0.44	2.17
AGRN	36.99	102.31	96.47	174.85	100.72	139.72	57.45	35.98	61.53	101.03	34.87	45.53	24.21	147.22	43.39	30.77	61.45	67.37	205.51	167.37	57.68	226.58	35.73	51.71	146.42	223.08	59.54	25.85	21.16	111.35	31.59	54.13	138.63	61.01	88.54	251.72	63.56	49.16	160.71	215.51	86.3	70.04	69.32	55.6	83.94	151.99	216.65	102.87	162.95
AGRP	0	0.77	0	0	0.08	0	0.23	0	0.09	0.09	0.22	0.1	0	0	0.17	0	0.26	0	0.35	0.23	0.15	0.39	0.12	0.13	0.23	0.35	0	0	0	0.17	0	0.45	0.21	0.08	0.19	0.17	0.82	0.59	0.09	0.41	0	0.17	0.1	0.36	1.63	0.53	0.32	0.08	0
AGT	25.48	16.8	50.74	19.54	17.48	4.25	1.01	24.85	9.45	487.41	3.95	27.96	9.24	25.06	77.64	45.38	41.01	20.03	24.54	21.87	129.87	5.69	8.42	9.35	1.78	25.57	44.05	27.68	24.15	27.39	26.2	43.17	30.44	96.46	34.02	29.03	20.72	245.02	211.31	21.96	18.86	57.58	4.68	24.61	1314.92	175.58	3.9	111.15	20.75
AGTPBP1	16.88	3.38	13.49	17.96	6.04	15.11	6.83	13.88	13.1	14.9	9.67	25.61	15.61	12.53	13.27	16.91	6.41	7.36	2.95	3.61	5.38	3.99	10.05	7.88	4.43	3.04	6.62	3.54	2.65	4.36	4.49	3.78	5.44	5.48	7.81	2.53	4.25	4.78	8.69	3	17.55	4.28	7.85	10.32	6.15	19.13	9.65	14.56	14.04
AGTR1	0.05	0.34	9.81	0.07	0.28	0.45	0.33	0.23	0.05	1.23	0.22	0.62	0	2.26	2.21	62.35	0.04	0.49	0.05	1.99	0.11	0.78	0.08	0.86	0.28	0.15	0	0.82	0.82	0	0.43	0	0.07	0.15	4.99	1.15	0.82	2.58	0.2	0.53	0.61	0.18	0.21	0.22	0.87	0.54	0.73	3.47	0.07
AGTR2	0	0.05	0	0.03	0.02	0	0	0	0	0	0	0	0	0	0.06	0	0	0.02	0	0	0	0	12.18	0	0.05	0	0	0	0	0	0	0	0	0	0	0	0	0.05	0	0	0.04	0	0	0	0	0	0	0	0
AGTRAP	60	99.13	38.04	78.33	63.56	31.36	126.15	69.98	38.24	81.67	40.96	50.52	29.5	102.34	43.62	56.45	33.12	71.43	145.65	98.8	64.76	111.48	42.3	139.23	130.99	125.12	83.5	42	18.59	124.32	62.21	77.55	80.57	78.31	62.47	229.58	111.03	102.79	78.44	217.5	58.96	55.11	96.04	56.83	76.78	94.34	84.18	51.55	25.5
AGXT	3.08	0.05	0.15	0.38	0.14	0.12	0.44	0.07	0.34	0.12	0.43	0	0.07	0.06	0.39	0.08	0.11	0.15	24.77	0.15	0.44	0.09	0.05	0	0.07	0.05	1.08	0	4.04	1.13	0	0.13	0	0.29	0.74	1.83	0.39	0.62	2.01	0	0	4.07	0.17	0.32	0.28	0.12	0	0.73	0.03
AGXT2	0	0	0.05	0.02	0.11	0.13	0.03	0	0.02	0	0.04	0.53	0	0	0	0.18	0	0	0	0.03	0.45	0	0	0	0	0	0	0	0.21	0	0	0	0	0	0	0	0.04	0	0	0	0.07	0	0	0.1	0.04	0.03	0.02	0.24	0.05
AHCTF1	37.74	11.47	35.84	33.95	16.05	33.84	25.2	23.19	49.78	24.45	30.59	46.27	34.96	27.16	32.62	30.22	12.61	16.22	9.98	8.85	9.76	15.44	14.47	13.17	8.46	18.51	13.55	8.95	6.62	13.12	7.17	6.64	13.53	13.65	13.26	14.69	16.18	6.96	16.37	17	39.96	17.34	23.53	29.18	16.09	61.6	22.59	25.52	36.86
AHCTF1P1	0.12	0.21	0.15	0.58	0.15	0.19	0.14	0.08	0.71	0.08	0.34	0.14	0.05	0.29	0.08	0.16	0.07	0.11	0.02	0.03	0.01	0.07	0.32	0.09	0.05	0.2	0.04	0.08	0.05	0.03	0.08	0.05	0.2	0.22	0.13	0.01	0.02	0.01	0.14	0.04	0.25	0.13	0.22	0	0.03	0.07	0.15	0.19	0.35
AHCY	329.89	387.62	371.03	398.55	453.19	192.49	220.38	209.11	162.66	113.01	228.55	310.67	366.87	202.52	122.25	210.09	230.87	162.05	244.59	215.4	244.48	155.71	299.51	112.08	320.49	344.43	509.97	77.42	117.09	196.85	100.41	151.78	256.6	289.01	169.98	211.82	240.07	186.39	193.24	335.19	323.96	300.2	470.95	272.39	265.05	270.95	298.03	185.1	486.56
AHCYL1	119.52	48.92	68.94	99.76	103.2	86.6	62.38	90.56	98.11	101.99	117.85	72.26	85.2	85.14	134.91	88.61	81.82	70.96	64.43	58.5	84	53.34	40.11	73.31	45.69	43.83	94.73	59.25	98.51	88.33	59.24	56.45	56.06	89.64	39.98	88.03	61.34	54.34	105.59	72.45	78.46	71.78	55.09	162.39	123.63	110.36	57.43	108.15	82.77
AHCYL2	22.68	17.9	12.42	31.58	112.42	29.32	128.71	17.83	19.98	59.01	52.06	43.39	150.62	10.48	62.73	73.72	47.58	26.57	12.13	41.13	46.68	5.2	51.3	12.83	11.75	8.85	51.11	29.75	51.05	53.01	32.27	58.77	33.9	33.85	17.23	23.77	100.79	19.58	112.81	11.41	24.99	19.68	11.29	99.37	14.68	26.05	10.36	33.95	77.26
AHDC1	2.88	9.37	7.72	11.45	18.29	8.03	6.38	5.6	9.63	19.17	5.95	6.57	5.32	14.59	10.5	6.17	14.19	53.91	23.53	20.21	10.79	12.14	17.87	5.52	9.57	14.46	9.95	9.83	7.28	10.66	8.85	10.86	11.43	13.56	11.4	31.51	11.81	19.5	20.99	34.22	19.98	8.43	14.2	15.91	29.65	10.81	8.8	23.88	15.33
AHI1	12.74	4.79	10.33	7.18	12.97	13.67	9.84	46.35	20.32	14.75	9.86	13.63	14.69	11.29	12.84	32.23	5.53	4.87	1.4	3.37	3.95	3.26	4.78	2.99	2.5	3.53	5.47	3.22	2.87	4.93	3.42	3.52	3.8	2.95	11.61	6.53	5.98	3.52	7.34	4.64	8.47	3.84	5.98	12.27	8.5	18.39	5.53	7.72	6.63
AHNAK	26.39	77.12	162.53	207.67	93.14	119.86	57.09	130.03	59.87	336.06	114.88	53.65	167.15	180.05	247.09	160.31	174.72	562.83	32.16	124.5	84.58	62.65	60.18	51.56	138.4	30.38	82.33	95.78	113.24	90.57	115.97	84.19	83.51	56.88	69.38	84.53	65.43	150.97	164.24	132	126.86	88.76	42.27	136.26	77.52	82.22	75.62	164.73	115
AHNAK2	0.57	14.61	15.51	68.37	9.57	27.2	0.8	2.6	1.74	30.37	2.14	2.76	37.83	14.28	7.44	9	3.75	81.26	0.87	25.12	3.58	9.88	1.75	4.71	68.1	1.83	0.34	1.63	3.85	1.85	1.18	0.71	4.74	4.83	53.64	13.03	7.75	11.12	22.62	26.47	18.38	3.02	8.98	5.54	7.77	22.94	2.43	20.23	1.99
AHR	49.38	51.37	89.76	80.27	68.32	140.74	39.87	75.95	79.33	164.69	36.43	130.65	37.56	298.17	95.94	67.26	58.57	41.23	42.66	52.86	35.09	60.58	53.48	122.23	19.32	18.45	68.31	36.24	29.29	33.92	36.22	59.75	59.16	51.35	64.39	50.21	79.49	39.21	85.78	66.74	130.52	34.07	65.58	74.07	34.87	93.03	76.82	71.63	73.62
AHRR	1.54	0.22	0.59	0.09	0.95	0.11	0.1	0.67	2.35	0.51	0.07	0.39	0.17	4.06	0.37	0.88	1.29	1.23	3.87	0.76	0.31	1.69	2.04	0.92	0.49	0.82	0.65	0.83	0.35	0.54	0.68	0.22	0.37	0.74	2.54	0.7	0.36	0.28	0.93	0.09	0.75	0.37	0.31	0.19	0.59	0.63	0.35	0.52	1.84
AHSA1	186.93	226.02	143.3	312.01	159.73	225.85	226.15	210.79	128.91	143.78	220.31	229.88	159.65	164.05	100.18	139.21	146.67	124.97	175.31	135.31	125.53	160.14	142.85	196.48	153.59	320.67	223.65	67.1	71.74	182.9	78.71	95.73	162.78	139.8	233.57	116.69	125.63	130.37	140.26	193.49	141.23	146.7	216.11	189.04	146.23	336.38	183.32	253.02	212.57
AHSA2	7.32	9.36	18.72	19.99	8.76	18.11	53.01	14.24	18.29	12.29	7.46	17.61	23.62	21.48	19.33	15.49	5.31	5.77	16.28	3.72	3.61	5.99	5.5	2.47	4.75	12.16	6.08	4.65	2.49	4.21	4.3	2.27	3.64	6.88	14.81	3.87	5.05	3.68	8.19	6	12.98	2.48	7.33	8.5	2.57	11.42	9.35	10.65	7.84
AHSG	0.03	0	0.19	0.13	0.1	0	0.05	0.07	0.11	0.04	0.06	0.39	0.08	0	0	0	0	0.04	0.24	1.13	0	0.13	0	0	0.1	0.21	0	0	0	0.11	0	0.14	0.24	0	1.05	1.66	0.5	0	0.04	0.84	0.12	0	0.09	0.16	0.28	0	0.11	2.66	0.07
AHSP	0.4	0.55	0	0	0	0	0	0.45	0	0.32	0	0	0	0.13	0	0.17	0.43	0	0	0	0	0	0	0	0	0.19	0	0	0.39	0.29	0.36	0.5	0.54	0.14	0	0	0.25	0.49	0.15	0	0.14	0.28	0	0	0	0.29	0	0.44	0.14
AICDA	0.15	0.22	1.11	0.2	0.28	1.44	0.91	0.31	0.25	0.28	0.1	1.37	0.46	0.19	0.37	1.31	1.1	0.04	0.24	0.42	0.16	0.61	0.25	0.16	0.42	0.09	0.34	2.23	0.42	0.38	0.76	0.33	0.08	0.1	0.02	0.15	0.41	0.49	0.3	0.06	0.15	0.14	0.43	0.29	0.15	0.31	0.45	0.76	0.88
AIDA	85.65	49.72	92.34	120	57.66	69.36	71.69	77.21	128.57	102.28	82.78	103.59	67.89	88.01	73.9	95.91	45.15	55.66	34.51	55.39	43.07	66.79	47.3	95.16	35.63	66.86	30.47	28.67	24.94	34.87	31.69	31.08	45.12	43.26	48.48	78.36	74.87	48.13	78.3	52.93	74.88	66.66	64.36	97.06	74.86	142.85	70.04	75.6	63.37
AIF1	87.97	91.49	164.29	50.81	67.83	43.35	60.53	126.89	58.67	308.31	164.32	28.28	139.88	94.19	217.05	206.26	42.03	62.02	107.37	99.95	120.66	283.57	87.56	145.22	76.74	22.74	29.19	104.48	59.32	59.54	130.75	109.07	188.82	78.41	46.58	74.34	146.03	258.4	88.19	74.82	17.54	42.76	20.41	38.08	219.68	47.34	251.1	66.43	27.7
AIF1L	0.46	4.57	5.34	5.8	5.28	1.87	61.22	3.73	28.95	9.85	0.75	7.02	0.49	7.61	7.48	6.59	8.18	68.27	12.66	9.59	3.87	9.14	3.37	9.61	6.81	6.45	4.17	3.76	2.62	4.63	4.17	2.6	0.38	7.59	3.95	2.12	5.89	15.34	3.52	27.25	6.25	24.85	0.82	11.12	5.3	104.82	0.99	8.47	0.29
AIFM1	87.55	41.94	62.68	92.22	67.24	45.65	88.18	179.43	59.16	43.04	92.85	72.76	153.08	65.11	77.49	55.59	58.99	29.81	44.84	26.67	68.69	78.19	31.61	34.89	28.6	37.55	64.9	34.18	62.49	57.86	42.89	62.25	33.46	62.35	34.38	47.69	54.94	58.34	52.4	32.02	173.81	44.23	172.68	83.72	63.36	43.95	48.83	44.89	78.86
AIFM2	14.99	24.06	23.54	15.56	14.7	28.52	51.24	14.24	11.03	9.4	18.8	9.1	17.87	12.94	20.43	17.96	40.31	15	19.94	20.71	24.97	23.56	10.05	21.52	24.79	30.53	42.61	9.6	15.58	34.59	9.98	13.05	9.63	18.95	28.55	14.91	10.41	18.17	22.37	26.99	30.69	8.14	20.68	15.75	30.69	26.14	11.07	13.06	10.86
AIFM3	5.4	1.22	0.78	0.29	1	0.31	1.73	2.85	1.63	0.9	1.07	1.66	2.93	1.25	3.13	0.71	0.12	0.47	1.43	1.36	1.1	0.73	0.18	0.62	0.46	1.74	0.18	0.21	0.58	1.23	0.79	1.04	0.19	0.57	0.81	4.1	5.02	1.3	0.5	0.84	4.87	0.4	1.86	6.89	9.61	1.31	0.3	1.42	0.12
AIG1	57	50.47	89.07	37.92	39.37	69.09	28.73	54.54	27.8	44.65	93.59	79.71	63.99	35.53	41.54	138.74	35.42	70.7	39.62	46.4	67.87	77.98	27.75	53.89	98.25	45.66	41.62	40.67	87.97	106.4	44.15	33.21	35.06	33.11	51.78	108.74	43.64	39.84	42.02	88.6	30.83	67.2	69.54	85.63	116.9	96.79	32.9	64.42	39.27
AIM1	49.43	10.56	38.01	43.18	33	28.5	1.84	59.29	8.55	27.79	90.12	33.16	46.09	8.23	19.79	57.26	23.97	113.35	5.55	9.68	40.96	14.14	12.85	6.75	20.99	7	30.48	9	26.54	6.79	9.87	17.98	20.72	12.78	12.41	6.36	18.85	17.55	37.37	13.04	3.97	1.2	16.26	32.51	17.07	32.74	10.24	33.71	20.69
AIM1L	6.45	11.93	7.78	8.19	17.9	6.96	0.87	1.31	0.48	5.62	6.64	2.5	12.62	2.28	2.24	13.03	4.92	131.4	6.06	7.39	8.69	1.8	2.52	0.4	6.85	1.15	6.42	0.45	16.46	7.17	0.72	7.42	20.21	9.11	5.33	28	2.45	3.47	15.23	24.53	16.85	1.37	13.19	7.82	0.62	8.75	1.8	17.14	19.01
AIM2	1.89	2.64	22.61	12.9	2.03	1.94	0.37	3.25	2.09	3.2	5.4	0.99	1.06	0.5	4	24.57	3.82	7.05	1.91	2.17	8.3	100.01	5.05	96.63	14.75	0.46	3.24	11.12	1.97	4.32	6.96	4.71	4.29	3.81	0.66	1.17	3.78	13.97	1.51	1.1	0.62	0.98	21.23	0.58	2.13	0.91	10.39	4.71	0.88
AIMP1	61	36.47	63.57	57.17	41.74	61.01	80.16	50.55	63.15	42.22	62.82	79.02	79.99	57.31	60.8	48.81	39.61	29.27	32.57	35.3	47.86	40.49	44.19	47.35	30.12	55.81	42.09	23.16	24.78	30.7	25.47	19.66	32.69	29.24	54.34	44.36	43.78	22.85	39.7	71.27	37.27	36.33	45.02	48.48	23.76	75.33	38.7	55.9	40.43
AIMP2	93.37	122.69	122.49	84.91	52.38	60.62	49.53	63.36	44.13	33.97	82.47	67.45	82.22	58.04	96.82	57.55	60.46	29.78	68.03	53.61	96.34	62.82	76.77	65.15	86.26	153.73	84.5	21.28	78.21	69.79	34.72	72.19	66.01	90.2	48.34	67.88	74.67	59.09	57.58	45.48	97.48	62.97	113.82	59.95	49.84	89.16	62.16	63.07	44.89
AIP	40.02	114.13	80.27	54.6	60.54	42.51	59.91	73.19	66.31	66.16	40.63	42.27	45.87	51.24	71.27	46.78	56.06	43.4	104.02	106.67	66.37	75.79	111.62	73.74	191.4	88.11	81.29	75.07	64.25	118.27	76.29	86.95	92.73	102.81	148.27	96.37	78.72	136.21	65.6	118	75.35	43.45	79.78	44.66	100.46	56.33	69.87	62.66	78.6
AIPL1	0.18	0.11	1.12	0.39	0.29	1.52	1.79	0.21	0.26	0.3	0.08	1.68	0.33	0.33	0.24	1.28	0.16	0.06	0.15	0.12	0.16	0.39	0.08	0.15	0.2	0.09	0.19	0.26	0.12	0.05	0.06	0.04	0.32	0.14	0.07	0.11	0.08	0.1	0.22	0.04	0.17	0.06	0.23	0.13	0.07	0.13	0.6	1	0.76
AIRE	5.65	0.03	0.23	0.06	0.09	0	0.26	0	0.1	0	0	0.26	0	0.04	0.8	0.08	0.2	0.03	0.16	0.03	0.02	0.03	0.04	0	0.07	0.04	0.03	0.1	0.15	0.15	0.19	0.14	0	0.2	0	0.13	0.11	0.39	0.35	0.02	0.73	0	0.64	0.58	0	0.11	0.02	0.12	0.01
AIRN	0.03	0	0.03	0.01	0.02	0	0.03	0	0.05	0.05	0.01	0.07	0	0	0.04	0.07	0.06	0.05	0.04	0.04	0.01	0.02	0	0	0.05	0.11	0	0.05	0.04	0.03	0.02	0.15	0	0.01	0.03	0	0	0.05	0.03	0.04	0.04	0.04	0.1	0.06	0.08	0.08	0.04	0.04	0.04
AJAP1	0.5	0.43	0.03	0.15	0.36	0.23	8.54	0.17	5.52	0.86	0.75	0.84	0.32	1.16	0.37	0.49	0.22	0.75	0.16	1.69	0.58	0.5	0.06	0.79	0.26	0.25	0.3	0.23	0.17	0.34	0.08	0.15	0.14	0.4	0.07	0.08	0.16	0.28	5.08	0.08	0.2	0.09	0.34	0.12	0.3	0.48	0.38	0.39	0.11
AJUBA	15.26	13.25	17.3	19.31	22.38	26.5	26.56	20.06	16.73	7.18	25.5	15.37	5	15.24	10.11	9.73	4.77	19.75	26.86	9.97	7.53	16.28	36.89	13.52	19.47	2.98	9.69	1.39	0.75	19.11	2.29	3.26	32.65	14.79	7.94	42.71	11.04	6.58	13.28	56.9	6.01	8.85	17.44	8.09	3.67	33.77	22.77	35.01	35.1
AK1	35.11	65.08	14.51	32.99	41.54	20.63	38.31	12.6	18.88	15.15	12.76	76.19	36.55	19.08	26.3	16.6	41.28	20.83	63.66	42.02	72.52	35.85	42.76	26.05	22.19	44.64	59.67	30.2	29.9	43.93	30.91	76.68	28.66	49.85	60.9	23.61	42.69	37.55	70.51	17.64	28.63	52.94	66.77	14.62	85.53	16.43	37.13	11.66	51.23
AK2	105.56	80.23	90.6	160.56	93.58	84.43	97.53	92.15	75.45	67.03	115.82	104.7	109.47	71.65	99.79	65.98	79.26	65.65	80.15	61.17	93.42	108.06	81.14	68.05	70.71	62.27	116.56	56.2	86.51	92.33	64.44	66.23	108.88	105.93	61.07	101.83	74.29	67.76	73.69	98.28	81.53	86.35	98.32	106.56	65.54	70.23	77.16	97.95	104.47
AK3	123.56	23.93	39.49	59.32	28.43	96.52	59.16	24.67	70	51.93	92.43	49.79	81.74	63.32	78.78	88.53	53.37	47.82	20.27	30.79	78.02	26.55	31.58	24.8	14.65	27.41	28.8	34.38	53.99	21.26	37.8	23.38	45.15	22.97	31.51	29.31	25.33	30.42	56.8	20.48	21.31	40.5	70.45	56.74	50	70.91	40.68	59.44	61.94
AK4	2.07	2.8	42.38	57.25	76	36.95	1.33	28.86	11.91	32.33	60.75	65.91	1.45	98.93	12.53	8.15	16.65	29.25	1.92	6.15	9.85	17.45	2.45	21.51	14.6	31.89	19.52	9.99	23.23	27.84	13.02	10.92	9.49	8.06	3.37	3.08	8.36	1.85	8.18	8.59	3.63	12.75	12.18	58.92	5.35	6.39	21.36	54.58	21.42
AK5	0.23	0.14	0.02	0.77	7.92	0.34	0.24	0.12	0.33	0.16	0.75	0.12	0.2	0.37	0.69	0.24	0.11	0.14	0.16	1.23	0.09	0.12	0.09	0.03	0.21	0.02	0.02	0.14	0.35	0.12	0.26	0.35	0.22	0.07	0.08	0.34	5.87	0.72	0.26	0.47	0.04	0.1	0.04	0.25	0.73	0.15	0.12	0.88	0.21
AK6	94.11	20.87	41.1	49.09	39.07	118.43	76.46	54.23	59.82	50.27	78.81	52	79.31	48.95	68.64	55.69	38.04	20.21	16.13	28.82	40.2	28.34	31.99	47.9	23.5	18.55	40.48	18.94	40.99	73.46	24.35	18.72	33.18	43.87	46.34	31.89	30.8	25.83	29.57	39.02	21.69	20.95	28.38	28.69	26.44	20.48	17.67	25.69	41.16
AK7	1.25	0.67	1.14	8.61	1.96	0.72	0.93	1.6	1.49	3.03	2.54	7.78	8.76	6.14	2.1	6.94	1.72	1.49	1.87	4.17	0.79	1.3	0.15	1.12	1.48	0.73	1.33	1.57	0.65	4.64	1.37	1.86	0.22	0.26	1.03	1.07	2.25	0.31	1.31	2.5	8.44	2.25	4.12	3.19	3.09	3.12	1.16	2.03	0.34
AK8	0.54	0.79	5.3	2.14	0.37	0.03	2.4	1.42	0.35	1.56	0.22	2.1	0.32	1.82	0.67	3.63	0.75	1.96	0.51	2.54	0.25	2.27	33.43	1.08	0.64	6.28	1.03	0.67	0.08	12.35	1.47	0.83	7.06	1.06	1.06	0.72	1.9	1.53	0.57	17.32	19.11	2.05	0.03	0.54	0.28	3.59	3.47	1.39	1.11
AK9	6.91	2.45	21.92	4.31	3.21	3.39	4.13	6.71	4.72	4.19	3.82	8.56	6.23	7.73	7.02	10.51	3.09	3.42	1.12	1.8	1.89	1.99	0.95	1.09	1.03	2.63	2.5	2.47	1.66	2.77	2.99	3	2.74	1.7	3.92	3.81	3.43	1.35	3.19	3.32	5.25	3.46	8.01	3.8	6.37	7.03	2.46	4.86	3.66
AKAP1	122.05	86.56	88.9	86.86	107.1	83.14	72.93	90.65	60.46	66.87	75.85	107.27	96.01	104.42	83.13	75.53	62.19	39.48	54.15	78.83	91.27	49.59	53.24	26.66	66.06	65.6	155.97	33.42	53.39	70.68	41.67	45.53	53.38	86.17	66.91	62.25	57.64	30.21	73.43	57.15	88.94	68.59	81.32	116.47	37.49	70.13	29.97	71.72	128.43
AKAP10	14.75	7.92	19.23	15.03	15.67	16.92	25.53	18.55	25.36	25.46	16.74	18.46	11.03	26.2	17.63	21.95	10.78	11.02	16.08	7.4	9.05	10.17	14.75	10.07	10.37	11.39	9.71	9.49	5.75	7.6	8.58	6.42	9.82	9.32	15.02	8.92	8.07	9.55	14.54	10.04	8.93	8.41	7.57	8.68	10.35	14.03	14.96	21.16	19.4
AKAP11	61.36	11.21	55.86	24.37	14.04	21.48	25.13	44.91	18.43	33.51	19.39	28.4	48.3	27.72	37.71	32.89	11.97	14.4	6.61	10.05	7.66	11.65	8.45	9.66	11.95	14	7.39	8.88	5.74	12.49	8.28	8.9	12.38	10.56	14.12	11.69	12.04	10.37	19.6	8.64	21.47	9.63	18.76	25	15.73	37.28	13.52	23.99	19.84
AKAP12	2.13	3.17	8.38	6.01	11.92	30.95	9.72	30.97	7.35	34.99	10.08	3.58	1.86	20.63	32.6	25.49	3.86	11.31	3.26	13.78	9.48	3.11	5.96	3.74	51.11	12.87	0.78	4.24	8.23	2.64	5.22	5.77	2.07	6.73	44.88	14.35	12.54	17.07	17.76	13.1	4.58	4.34	12.9	7.3	17.31	4.45	6.82	29.86	2.13
AKAP13	14.09	31.57	37.97	30.72	41.41	40.25	27.36	44.66	39.17	80.52	30.46	26.33	29.01	49.61	75.73	48.25	53.9	35	22.8	65.25	26.89	23.4	30.36	12.61	17.41	21.52	21.48	37.93	19.63	44.11	42.25	26.46	25.8	21.11	55.85	52.48	34.41	39.95	54.32	25.66	36.58	26.18	31.68	50.28	36.69	30.57	43.16	44.89	30.52
AKAP14	0	0	0	0	0.39	0.23	0.22	0.23	0.16	0	2.33	0	1.27	0	0.08	0	0	0	0.32	0.49	1.15	1.53	0.22	2.33	0.34	0.32	0.23	0	0.43	1.84	0.2	0.18	0	0.1	0.18	0	0	0.53	0	0.15	0.08	0	7.12	0.76	0	0	0.32	0	0
AKAP17A	13.56	15.76	10.86	13.99	29.18	12.53	55.05	15.1	9.46	19.71	16.41	13.34	25.94	14.14	15.09	23.15	24.82	24.75	19.19	10.74	18.8	20.83	32.8	17.33	12.57	33.06	9.98	16.16	11.5	12.74	11.99	19.93	14.43	14.34	27.2	28.6	15.16	20.19	21.95	14.51	23.27	7.26	27.43	18.29	30.41	21	33.45	26.78	27.17
AKAP2	10.3	7.23	27.77	48.58	14.06	10.95	18.8	19.71	14.95	54.23	12.08	6.17	25.75	37.11	38	33.59	21.92	20.38	8.62	26.55	16.6	13.52	18.68	8.37	15.7	15.82	4.72	30.78	12.98	19.17	28.47	12.6	5.04	11.56	11.34	23.7	30.43	32.8	35.8	17.69	28.42	12.36	9.67	10.09	15.62	7.55	25.68	49.75	9.51
AKAP3	0.15	0.05	0.42	0.19	0.22	0.2	1.81	2.4	0.87	0.8	0.95	1.97	0.46	0.39	0.39	0.42	0.46	0.55	0.4	0.36	1.34	0.69	0.43	0.51	0.11	1.92	1.64	0.57	0.65	0.38	0.46	0.13	0.24	0.56	0.18	0.68	0.89	0.8	0.57	0.62	0.09	0.23	1.79	1.21	0.83	0.13	0.8	0.89	0.63
AKAP4	0	0	0.18	0.02	0	0	0	4.2	0.02	0	0.02	0.16	0.28	0	0.04	0	0	0.02	0	0	0.05	0	0.03	0	0	0	0.06	0	0	0	0	0.07	0.03	0.08	0	0	0	0	0	0	1.39	0.04	0.07	0.03	0.03	0	0.02	0.02	0.26
AKAP5	0.33	1.25	3.03	0.95	1.25	4.04	2.4	1.98	2.71	1.35	1.39	3.7	1.7	1.01	1.11	3.25	0.81	0.8	0.37	1.98	0.71	1.8	1.34	1.01	0.67	0.33	0.33	1.75	0.83	1.34	1.13	0.73	1.06	0.78	0.73	1.82	0.94	1	2.15	0.68	0.56	0.44	0.69	1.67	0.82	1.43	4.33	7.89	1.42
AKAP6	0.24	0.12	1.81	0.3	0.2	0.16	2.17	1.35	1.13	0.51	0.97	0.59	0.22	2.18	1.75	1.49	0.26	1.67	0.48	0.96	0.4	1.07	0.47	0.31	0.1	0.53	0.1	0.4	0.67	0.37	0.34	0.06	0.46	0.59	0.24	2.74	1.11	0.57	0.71	2.71	1.16	0.21	0.65	0.97	1.34	3.17	0.63	1.56	0.36
AKAP7	2.71	0.94	14.81	2.26	22.54	26.43	1.11	21.05	2.24	6.69	6	20.31	1.73	2.76	6.66	7.41	4.43	8.12	0.88	2.48	20.64	2.44	9.72	2.85	2.92	0.36	3.93	3.78	13.26	18.04	5.13	3.48	1	2.92	9.06	17.71	20.61	4.81	13.78	2.62	3.94	2.86	2.03	29.57	2.43	2.84	5.29	21.19	1
AKAP8	11.87	16.78	20.39	15.1	24.3	23.56	30.84	33.09	26.88	16.52	17.97	15.65	24.44	14.58	18.32	22.38	17.32	16.3	19	14.01	16.95	19.97	22.16	12.46	13.17	12.58	23.66	11.24	10.34	19.47	10.04	14.19	13.46	37.75	21.18	11.19	20.16	12.68	20.15	13.05	32.88	13.26	25.8	22.06	14.56	25.48	17.59	29.61	24.29
AKAP8L	17.04	29.91	30.41	22.46	35.95	26.87	38.9	41.83	39.95	26.83	18.94	25.67	27.35	27.23	24.55	30.66	23.31	33.37	42.78	28.32	25.73	37.65	43.89	19.78	37.09	52.62	28.12	22.54	18.56	33.14	21.43	27.6	27.48	61.08	59.22	31.4	36.88	29.8	30.05	30.96	33.85	27.63	39.77	30.39	36.77	57.65	41.08	37.36	28.81
AKAP9	22.43	5.07	159.03	23.45	16.51	18.07	9.48	25.98	16.54	21.96	15.37	25.02	30.48	154.1	26.4	18.69	11.86	13.98	11.31	10.08	9.92	7.97	8.07	7.98	8.47	21.2	14.68	10.98	16.3	10.08	9.39	9.51	6.75	8.75	14.52	16.7	48.16	7.9	13.14	15.62	28.94	15.41	14.73	20.09	8.99	17.93	24.17	31.71	18.73
AKIP1	35.87	33.51	28.95	35.99	27.91	22.41	35.2	14.74	17.17	25.05	28.28	25.8	32.32	32.19	20.9	27.83	14.06	20.79	36.19	30.13	25.69	36.14	38.12	23.33	13.65	27.25	23.14	11.55	12.17	19.46	19.18	16.05	21.61	24.96	25.02	58.34	24.46	30.1	30.79	43.87	23.11	21.7	35.45	21.25	23.4	18.92	25.64	24.19	24.28
AKIRIN1	47.98	34.97	51.36	50.12	42.32	59.82	75.5	45.59	56.99	47.27	46.97	62.05	39.88	46.35	64.53	77.07	43.73	47.12	30.51	21.17	37.02	33.04	34.5	40.52	18.08	40.51	37.14	27.96	36.29	47.17	29.17	28.84	25.24	38.33	21.76	69.2	45.58	32.18	45.2	49.02	45.07	35	32.06	48.68	28.48	51.47	47.24	66.2	55.58
AKIRIN2	54.55	35.76	69.16	49.29	37.83	49.13	30.6	36.58	45.15	50.7	40.82	64.1	41.17	38.84	36.33	141.62	30.83	60.09	42.67	25.09	41.71	58.12	83.69	45.54	53.18	41.94	36.24	32.43	32.91	24.92	39.68	44.24	52.21	48.97	61.18	26.88	30.21	60.2	44.09	26.65	40.89	18.79	71.24	45.25	49.02	121.77	40.04	71.76	42.21
AKNA	9.93	19.85	12.24	5.05	16.09	5.32	5.55	16.43	6.86	22.34	10.29	8.19	9.76	7	25.01	19.23	36.63	17.58	19.66	17.23	23.09	33.59	43.82	8.49	5.56	6.96	17.07	44.75	11.66	26.42	27.64	25.36	18.37	20.08	8.76	8.59	23.15	60.89	20.54	5.96	17.15	10.52	18.96	11.74	28.01	16.87	36.83	25.86	15.13
AKNAD1	0.03	0	0.02	0.02	0.02	0.31	0.15	0.08	0	0.23	0.02	0.07	0	0.02	0.07	0.17	0.03	0.09	0.12	0.03	0.02	0	0	0.06	0.13	0.03	0	0.08	0	0.02	0.03	0.04	0	0.04	0	0.06	0	0.02	0.04	0.13	0.14	0	0.09	0.06	0.18	0.06	0.02	0.19	0.11
AKR1A1	203.35	237.35	109.43	85.49	234.44	170.29	208.78	178.27	106.67	168.32	240.78	122.04	155.96	191.63	171.44	174.91	205.58	148.56	253.76	127.21	354.26	242.05	195.78	252.48	92.43	94.83	202.73	194.55	297.94	263.53	230.98	188.7	213.43	257.22	109.51	241.14	202.28	286.02	178.81	158.54	134.74	263.71	186.56	208.59	174.75	105.65	217.71	165.24	171.85
AKR1B1	27.06	59.99	48.56	223.18	95.8	69.31	83	50.65	68.69	164.76	134.93	43.25	118.32	67.62	123.15	79.93	72.75	40.74	43.44	111.79	122.16	299.45	84.99	96.88	23.76	379.32	13.08	90.99	34.21	152.7	96.34	79.47	201.51	81.23	98.32	90.59	157.47	199.83	125.72	35.72	19.08	161.02	8.51	90.75	112.2	38.44	135.7	85.52	81.02
AKR1B10	91.01	30.17	13.27	302.22	63.85	49.62	7.26	61.52	125.94	79.81	118.78	300.31	209.87	671.16	631.57	141.55	2228.64	154.98	89.13	156.56	96.63	0.7	100.89	0.63	2.63	2.97	621.4	1217.88	1306.32	1323.89	1383.25	526.5	444.45	313.27	1.86	83.85	62.52	78.79	110.6	0.78	43.62	331.12	4.21	136.35	5.8	16.13	3.92	1.64	160.2
AKR1B15	0.35	0	0.27	0.79	1.04	0.1	0.04	0.15	0.11	0.45	0.73	0.22	0.49	0.16	1.85	0.21	54.63	2.76	1.24	0.15	0.03	0.35	1.56	0	0.31	0.05	29.24	34.14	0	0.26	19.46	27.53	6.56	6.7	0.04	0.18	0.03	3.67	0.04	0.26	0.08	0.07	0.13	1.66	0	0.04	0.07	0.47	0.17
AKR1C1	80.9	8.98	39.88	52.51	47.37	17.54	0.96	9.77	40.65	115.59	55.93	60.16	61.51	168.46	150.6	45.24	215.51	60.93	93.02	21.3	35.43	6.57	24.99	17.72	5.45	2.76	51.89	514.55	242.75	158.24	743.19	119.07	107.73	41.5	67.38	1456.23	329.31	44.44	50.76	7.89	15.98	8.33	51.2	247.5	23.24	15.72	3.72	5.36	4.09
AKR1C2	13.28	1.53	7.6	7.45	13.03	5.57	0.53	2.37	12.7	5.97	11.65	11.48	14.48	153.05	40.21	28.36	21.37	23.38	25.37	0.78	11.37	0.88	4.33	3.74	3.54	1.03	2.76	189.32	27.44	86.68	129.4	28.37	1.73	1.89	30.87	152.31	52.11	5.08	6.31	0.8	13.97	1.18	1.08	9.96	5.4	5.71	0.14	1.3	1.2
AKR1C3	665.67	56.48	415.9	556.46	538.44	73.33	50.78	251.81	776.86	179.01	151.49	385.56	406.75	466.07	587.46	462.15	478.27	64.39	333.51	174.04	350.06	242.09	134.01	133.92	33.26	2.68	140.59	696.09	585.42	599.95	635.11	339.76	284.81	307.66	430.3	391.98	332.72	252.73	162.1	287.13	353.17	217.75	289.35	522.34	101.63	138.47	22.2	3.91	54.12
AKR1C4	36.23	0.48	6.25	7.94	11.31	0	1.23	5.82	8.68	2.52	2.36	24.19	0.52	8.9	17.28	6.33	1.2	0.26	26.33	1.99	4.31	11.07	0.38	0.96	0	0.07	1.39	0.84	2.21	9.03	2.23	3.04	0.39	8.38	0.54	0.32	11.65	2.39	1.38	1.25	4.19	2.81	6.27	9.7	11.78	37.32	0.24	0.05	1.13
AKR1C6P	0	0	0	0	0.04	0	0	0	0	0	0.04	0	0	0	0.04	0	0.07	0	0	0	0	0	0	0	0	0	0	0	0	0	0	0	0	0	0	0	0	0.36	0	0	0	0	0.05	0	0.13	0.05	0	0	0
AKR1C8P	2.19	0	0.46	0.05	0	0.03	0	0.11	0	0	0	0.03	0.05	0.12	0.03	0.09	0.04	0.03	0	0	0.02	0.22	0	0	0	0	0	0	0	0	0	0	0	0	0	0.08	0.02	0	0	0.05	0.08	0	0.25	0.19	0	0.17	0	0.03	0.03
AKR1D1	0.12	0	0.85	0.3	0.27	1.1	1.11	0.09	0.26	0.14	0.09	1.49	0.26	0.16	0.09	0.86	0.14	0.18	0.09	0.04	0	0.03	0.07	0	0.06	0.06	0.08	0	0.06	0.05	0.05	0.08	0.11	0.02	0.11	0	0.12	0	0.19	0.06	0.25	0.13	0.25	0.19	0.07	0.22	0.25	1.01	0.66
AKR1E2	0.37	3.92	3.75	2.11	2.09	0.19	0.48	11.37	9.84	0.97	5.08	4.08	0.24	0.63	4.64	11.88	0.24	0.43	5.37	2.57	2.49	2.65	0.27	4.03	5.36	5.85	0.04	1	0	1.15	0.79	0.92	0.15	1.48	3.01	2.79	3.14	2.25	1.13	6.27	6.87	2.54	3.29	2.93	3.56	6.16	0.3	1.81	0.13
AKR7A2	31.25	66.43	23.02	46.82	38.22	25.43	74.8	35.17	39.98	63.17	44.72	37.52	33.15	46.16	55.08	28.06	38.4	50.39	224.42	63.16	100.66	38.72	50.3	48.91	42.94	53.82	105.77	45.38	142.25	101.41	63.31	79.6	50.25	79.17	49.52	102.07	65.15	68.06	67.57	82.08	45.51	90.67	43.41	81.92	63.68	24.76	50.15	30.45	44.42
AKR7A2P1	0.48	0.06	0.24	0.67	0.13	1.37	0.42	0.55	1.4	0.44	0.91	0.38	0.85	0.18	0.73	0.75	0.17	0.18	0.19	0.57	0.24	0	0.13	0	0.21	0.58	0.29	0	0.83	0.27	0.11	0	0.19	0.41	0.11	0.33	0.05	0.05	0.26	0.27	0.24	0.05	0.16	0.34	0	0.54	0.48	0.41	0.83
AKR7A3	70.45	317.8	37.55	128.07	45.01	48.28	21.28	85.58	60.45	123.11	174.98	31.81	82.62	82.61	207.25	38.02	476.29	11.77	465.31	118.17	375.81	2.81	32.51	7.74	15.79	2.82	327.23	514.64	789.94	351.47	453.98	317.54	76.37	236.39	69.44	54.65	143.84	82.02	165.66	48.65	175.91	200.03	52.3	177.54	89.75	8.5	15.11	1.9	59.81
AKR7L	3	5.23	4.25	15.13	3.26	3.84	5.19	9.69	4.56	4.86	7.69	3.7	11.53	2.33	11.33	2.7	9.65	0.67	13.23	2.14	5.46	0.24	0.73	0.08	0.46	0.08	6.24	7.52	4.77	6.22	5.28	3.68	1.85	8.76	3.31	2.3	3.88	1.04	4.19	2.57	8.43	2.87	4.97	8.18	1.11	0.47	0.59	0.29	2.9
AKT1	70.59	134.98	74.71	184.01	171.51	74.48	64.08	80.64	102.92	121.91	89	91.41	80.98	132.59	95.91	55.62	177.02	116.64	174.79	142.45	138.73	188.21	81.14	111.83	204.78	213.9	222.17	105.92	64.91	213.86	102.55	110.24	113.49	105.85	112.88	147.45	136.42	132.05	167.84	120.91	217.27	173.78	210.88	114.87	162.12	147.66	175.93	134.47	140.09
AKT1S1	44.25	125.1	102.46	101.74	88.71	49.19	102.16	68.79	33.4	66.68	44.98	37.96	44.69	110.29	33.72	32.35	98.05	71.75	159.95	118.84	95.24	127.21	204.1	104.93	71.85	78.37	128.91	57.79	69.73	54.1	68.91	87.47	211.45	154.27	90.89	146.39	147.79	92.5	113.02	73.44	167.26	90.13	95.34	58.32	125.36	151.34	149.17	98.64	87.75
AKT2	44.48	54.64	42.17	54	55.49	29.38	38.47	29.39	32.01	44.74	27.46	25.01	28.15	36.74	28.5	26.9	43.59	52.47	80.55	55.97	51.61	53.97	59.41	28.69	53.61	102.04	51.15	34.26	26.58	30.06	32.77	31.07	77.98	67.69	66.09	55.73	64.9	52.99	51.82	57.01	131.65	28.47	55.59	44.03	73.19	60.71	76	58.42	57.64
AKT3	3.31	6.08	10.69	5.79	12.27	6.2	8.41	11.45	20.53	46.89	10.25	5.35	6.9	29.96	25.64	15.74	4.77	6.41	3.05	13.78	6.96	6.48	17.24	4.14	4.16	2.86	1.96	5.26	4.95	4.17	5.46	5.08	3.41	8.29	8.86	7.4	10.51	14.47	24.63	7.73	5.08	5.85	3.04	13.4	38.36	6.66	10.72	24.33	2.28
AKTIP	25.82	14.64	29.06	17.75	25.1	24.14	26.53	23.85	35.64	33.8	20.8	20.21	23.59	23.48	25.48	38.59	15.06	27.4	11.46	20.13	15.26	10.89	164	13.45	16.56	21.05	15.41	11.85	17.22	23.53	11.03	8.03	15.22	15.38	14.05	41.34	21.97	13.75	22.31	26.72	10.65	14.1	19.36	22.35	9.79	47.53	19.3	24.47	24.92
ALAD	27.06	30.89	27.42	24.18	50.68	16.54	59.73	30.94	35.94	42.16	16.49	30.92	58.96	21.63	64.32	26.75	26.7	51.72	64.61	45.08	28.54	30.1	27.04	16	12.1	19.13	31.84	42.17	32.22	46.15	59.7	26.38	23.59	37.44	31.14	76.33	50	31.39	49.21	26.94	31.35	32.91	40.7	41.64	25.16	24.99	38.49	53.77	22.93
ALAS1	93.18	60.49	73.07	107.36	100.86	132.48	79.08	61.3	109.31	82.89	116.97	61.99	78.96	86.53	68.94	95.79	145.28	78.19	77.95	53.02	103.84	106.46	72.63	71.68	60.48	63.52	112.11	75.41	109.42	116.42	77.53	90.58	88.23	42.82	67.28	143.36	65.18	82.13	113.64	83.24	70.59	60.38	71.05	103.38	82.24	75.08	153.76	82.09	120.14
ALAS2	0.13	0.12	0.06	0.02	0	0.03	0.16	0.27	0.09	3.05	0.1	0.1	0	0	0	0	0.09	0.03	0	0.13	0.03	0.11	0	0.09	0.14	0.6	0	0.25	0.53	0.03	0.16	1.11	0.08	0.03	0	0.13	0.24	0.07	0	0	1.19	1.35	0.17	0.18	5.45	0.62	0	0.9	0.57
ALB	0.07	0.38	0	2.65	1.15	0	5.08	0.08	4.15	0.05	0.21	0.12	0.03	0.07	4.43	1.46	1.96	0.91	0.43	0.11	0	0.15	0.08	0	0.02	0	0.27	0.95	0.15	19.22	0.36	0.38	17.01	0.05	0.12	473.38	447.35	0	0	0.03	0	0.05	0.06	0.04	0.04	0.06	189.76	0.28	0
ALCAM	15.73	6.02	9.76	51.77	19.15	79.22	116.98	12.3	47.06	42.18	42.97	7.44	18.58	191.91	34.49	33.65	26.6	8.16	13.22	18.98	22.26	22.28	5.61	80.61	35.37	163.17	11.17	26.56	11.86	12.09	22.23	15.22	7.96	11.6	41.83	4.08	45.48	14.93	23.35	147.25	22.54	11.9	13.07	52.28	33.92	324.29	44.66	23.47	70.05
ALDH16A1	6.31	60.78	15.07	13.4	32.86	13.94	7.16	22.41	8.8	13.37	12.22	6.01	12.7	9.39	9.64	9.81	38.19	20.19	47.13	33.38	58.48	33.56	57.42	21.52	21.86	14.49	49.22	27.43	22.93	21.96	30	27.65	85.74	42.64	42.6	21.26	39.12	52.51	39.16	32.4	51.35	33.36	55.45	25.86	30.42	91.85	46.35	34.23	45.43
ALDH18A1	99.81	74.06	128.69	93.49	111.49	128.64	224.56	66.56	67.54	93.45	107	65.99	85.5	71.66	114.07	110.72	90.46	55.12	43.27	63.46	112.74	71.34	98.35	66.67	50.49	76.44	123.3	48.13	80.57	78.59	55.51	63.63	75.72	94.86	104	143.58	66.99	66.33	97.34	76.32	127.75	75.57	86.41	186.24	65.13	130.16	151.29	146.41	156.55
ALDH1A1	394.37	139.78	144.92	483.25	541.43	1.84	1191.02	79.96	139.24	83.18	19.17	326.07	162.85	1152.71	440.65	108.58	436.5	52.68	227.58	88.63	33.5	22.24	205.04	31.65	2.48	189.03	38.44	413.75	340.81	821.56	439.03	257.98	594.45	66.85	25.94	537.23	311.03	52.32	213.07	8.53	169.92	429.79	4.55	247.61	172.73	147.1	680.73	11.77	4.47
ALDH1A2	0.11	0.18	0.33	0.51	0.07	0.09	0.12	2.04	0.83	0.98	0.27	0.02	0.19	2.62	0.78	1.75	0.94	0.84	0.04	1.5	0.29	0.26	0.32	0.17	0.2	0.09	0.02	0.34	2.05	0.4	0.64	0.49	0.14	0.11	53.59	0.1	5.05	1.54	0.17	0.36	0.96	0.2	0.13	0.25	0.43	0.07	0.1	1.98	0.06
ALDH1A3	7.09	7.75	20.88	12.12	33.28	5.56	27.55	26.14	10.63	113.04	4.06	4.72	12.77	43.51	62.7	38.33	7	24.92	3.49	17.06	20.01	26.34	11.22	9.98	10.18	8.03	4.66	8.73	8.36	8.47	11.96	5.91	8.83	27.55	16.94	44.17	24.46	57.15	59.2	9.13	26.29	12.11	2.09	33.93	30.26	22.8	26.22	22.36	5.76
ALDH1B1	156.43	27.77	40.38	29.14	42.62	53.9	80.8	69.66	24.36	21.06	49.38	254.5	19.89	48.96	36.49	22.19	29.58	14.89	23.59	39.97	143.53	63.05	18.53	38.84	29.26	43.33	49.89	12.66	22.97	26.69	17.72	24.96	22.68	40.04	21.29	35.43	31.85	43.79	58.83	29.46	63.88	41.7	91.48	79.33	45.56	103.49	45.41	123.56	38.59
ALDH1L1	0.07	0.12	0.26	7.52	0.3	0.04	0	1.97	5.4	0.08	0	0.06	0.02	10.18	0.41	0.66	0.56	4.53	0.19	1.63	0.02	33.68	0.84	2.5	0.21	0.22	0.18	1.82	0.44	0.89	0.25	0.04	0.02	0.34	1.02	0.9	0.49	0.5	0.16	0.92	17.2	0.79	0.42	2.95	0.46	0.12	0.02	1.1	0.24
ALDH1L1-AS1	0	0	0	0	0	0	0	0	0	0	0	0	0	0	0	0	0	0	0	0	0	0	0	0	0	0	0	0	0	0	0	0	0	0	0	0	0	0	0	0	0	0	0	0	0	0	0	0	0
ALDH1L1-AS2	0	0	0	0.04	0	0.03	0.03	0	0.13	0	0	0	0	0.09	0	0.05	0.04	0.08	0	0.03	0	0.06	0.07	0	0.05	0	0	0	0	0	0	0	0	0.02	0.03	0.05	0	0.06	0	0	0.13	0	0.06	0.18	0	0	0.07	0.05	0
ALDH1L2	2.64	1.63	2.93	2.32	4.43	9.6	1.28	4.58	2.97	15.41	4.84	13.28	7.12	6.41	8.13	3.81	3.63	3.64	0.91	2.81	0.97	1.37	1.61	1.4	4.4	1.12	1.11	2.52	1.52	2.27	2.18	2.85	0.93	1.93	1.17	2.14	5.07	3.73	5.57	2.56	1.25	1.12	1.25	5.34	6.85	5.85	3.63	8.72	1.16
ALDH2	140.47	268.14	133.3	217.55	225.26	162.45	276.51	186.77	149.13	223.71	286.66	161.89	157.87	88.6	360.35	210.24	310.04	171.38	308.88	339.72	334.04	92.35	524.31	65.72	61.85	61.96	302.15	323.78	301.81	529.27	527.02	283.15	258.14	309.25	284.94	396.68	194.34	238.95	258.61	26.19	192.52	275.16	87.99	295.5	96.26	202.42	146.66	203.05	103.64
ALDH3A1	39.02	47.75	0.65	8.48	13.87	1.66	510.88	1.74	42.54	23.73	5.42	13.88	12.96	100.67	171.37	29.19	405.07	404.43	212.94	123.34	21.5	7.19	56.52	35.6	2.31	54.47	55.2	442.33	10.66	193.01	504.88	147.4	112.22	65.8	2.63	1.95	9	4.72	60.8	2.06	6.24	94.81	10.1	9.67	3.61	45.1	9.75	1.67	1333.15
ALDH3A2	43.93	24.87	30.81	81.83	43.28	36.01	262.26	43.28	59.24	49.46	65.68	70.32	43.87	94.07	85.29	63.01	76.54	144.16	145.11	20.75	54.11	44.31	27.89	36.86	24.71	41.4	61.51	37.18	67.71	27.52	65.23	34.27	46.61	43.61	29.77	32.24	23.08	26.33	50.48	20.96	31.63	29.22	39.89	48.21	30.76	54.84	39.81	50.1	173.44
ALDH3B1	45.24	56.86	37.85	63	44.6	29.15	19.13	14.24	18.71	55.99	11.16	13.17	24.46	33.86	32.24	19.44	58.19	20.36	44.43	89.62	60.68	32.22	14.57	37.99	84.14	6.35	13.8	22.64	39.97	88.51	26.49	50.41	58.66	33.31	82.28	72.49	37.68	39.38	50.81	76.11	61.46	73.73	12.18	38.43	26.92	33.18	35.7	21.52	26.53
ALDH3B2	7.09	2.02	1.89	0	3.71	0.02	16.05	0.68	0.21	3.29	0.08	3.38	19.26	17.86	0.78	13.43	0.47	203.36	6.65	3.18	0.04	0.41	10.48	0	7.07	18.5	0.12	0.29	0	13.93	0.68	0.6	10.71	1.64	5.5	31.45	4.59	0	3.28	9.87	24.55	1.4	2.18	2.08	0.03	38.56	5.22	2.73	4.01
ALDH4A1	33	14.64	6.28	17.77	14.46	6.2	41.74	3.67	13.58	9.27	5.69	17.21	5.41	19.69	11.45	8.91	16.78	42.32	38.36	14.89	4.59	18.64	15.77	8.96	4.86	43.83	26.6	13.42	2.43	16.76	15.67	12.48	22.33	4.51	4.49	20.55	16.06	9.64	16.49	18	22.11	12.66	37.65	28.02	48.13	29.03	20.39	7.25	62.82
ALDH5A1	2.82	8.42	12.37	3.85	19.29	18.92	112.44	7.09	24.35	15.02	16.73	26.51	14.43	24.44	20.99	15.02	7.96	10.71	18.13	7.79	14.29	27.49	14.5	11.91	5.75	17.18	14.64	7.56	7.2	18.97	9.37	5.32	1.49	14.39	3.57	22.38	13.97	10.61	11.66	27.7	16.85	15.16	2.42	16.45	11.96	19.85	26.8	26.88	10.87
ALDH6A1	9.96	7.64	14.81	17.42	16.62	42.66	39.37	13.4	39.18	17.71	28.36	28.15	11.85	19.15	33.66	19.58	18.63	16.04	9.04	15.52	19.78	17.03	10.39	14.53	4.05	9.53	19.63	28.83	28.8	13.87	25.31	14.15	7.31	14.87	8.49	5.47	13.27	9.44	11.58	9.23	11.47	30.52	9.15	20.2	19.15	28.24	19.53	28.14	16.61
ALDH7A1	11.72	11.3	12.41	17.17	14.64	32.26	23.83	7.86	21.34	22.21	20.15	6.21	14.69	12	14.1	11.81	10.56	25.74	12.41	16.97	22.79	11.46	19.17	24.26	6.6	11	35.74	8.5	9.08	22.09	13.44	7.11	21.08	17.7	19.6	19.96	14.19	13.86	18.73	19.03	16.29	6.54	21.03	16.2	13.27	17.73	17.29	29.07	35.89
ALDH8A1	0.19	0.06	0.23	0.14	0.34	0.4	0.19	0.84	0.48	0.28	0.38	0.43	0.14	0.35	0.57	0.56	0.15	0.12	0.08	0	0.02	0.37	0.28	0.45	0.13	0.03	0.1	0	0	0.09	0.25	0	0.06	0.12	0.34	0.05	0.19	0.09	0.13	0.11	0.05	0	0.06	0.24	0	0.05	0.04	0.28	0.11
ALDH9A1	70.92	37.99	64.2	67.32	73.47	47.8	96.02	87.87	194.37	65.79	85.65	102.22	54.26	51.19	115.5	71.45	60.25	200.11	85.47	52.93	82.2	70.39	36.52	45.1	20.44	64.93	86.15	33.18	65.75	79.32	57.43	39.07	41.4	44.9	42.79	90.56	79.87	57.82	62.06	40.56	121.51	129.4	71.32	119.12	88.43	106.43	63.82	49.48	51.43
ALDOA	1273.81	2246.35	2329.79	2910.01	2681.23	1769.84	1429.73	1619.3	1592.74	1051.32	1993.5	1542.35	884.03	2930.81	799.71	1136.44	1708.63	1874.97	1950.09	2257.62	1892.91	2508.81	1257.43	2312.19	3907.28	1673.25	2099.23	1197.04	1643.8	2053.36	1190.18	1873.11	1648.45	1708.75	2061.08	1218.47	1579.06	1416.24	1261.13	2189.06	1737.07	1646.49	1956.94	1524.31	1945.39	1407.89	1177.05	1186.39	1742.66
ALDOB	58.5	0.45	74.11	25.6	176.95	1.17	0.28	616.92	35.71	25.23	291.39	9.22	6.78	36.2	3.73	250.65	17.51	1.2	5.63	35.51	794.39	0.14	69.49	0.15	0.2	0.27	6.82	31.01	4040.43	39.87	24.54	301.79	10.53	533.07	0.7	0.05	1.13	175.22	93.82	0.14	52.99	368.84	1.51	294.85	24.6	2.8	15.03	1.5	13.03
ALDOC	45.9	52.81	68.51	82	130.86	76.09	110.86	17.48	42.17	12.25	36.39	82.63	4.72	56.07	44.57	5.77	19.61	36.19	56.11	33.69	10.47	37.78	14.28	30.48	73.28	8.29	10.31	41.68	130.1	63.74	49.04	25.01	14.04	16.22	8.69	8.17	27.31	20.49	8.27	52.5	43.95	10.95	45.47	110.94	56.71	38.22	14.39	59.32	29.18
ALG1	20.85	26.52	14.36	23.31	25.74	17.55	38.94	22.46	15.65	25.92	15	21.36	15.35	26.6	25.09	13.91	29.82	12.24	33.57	37.14	32.44	21.86	19.68	22.96	17.99	29.57	52.73	16.34	15.53	34.94	21.71	20.69	18.74	29.59	26.15	34.39	27.75	22.4	30.59	29.25	27.59	45.13	27.52	30.22	31.95	15.92	30.8	20.02	30.94
ALG10	7.75	2.77	6.91	4.88	5.45	5.45	7.67	10.44	8	4.86	6.67	10	5.33	8.17	5.34	7.26	2.86	3.06	2.25	2.37	3.76	4.14	2.39	4.37	3.57	2.57	3.92	1.65	2.14	2.53	2.13	2.03	1.36	3.7	3.14	3.26	3.39	1.89	3.41	1.79	3.87	5.08	2.59	5.68	3.5	6.74	4.43	6.56	7.74
ALG10B	4.01	0.75	4.58	3.86	3.05	1.94	7.72	2.49	7.1	5.25	3.47	7.94	5.38	6.83	4.53	5.41	2.06	1.94	1.38	2.14	1.88	1.89	1.07	2.38	2.59	2.78	1.51	1.88	1.04	1.91	1.9	0.88	0.4	0.69	2.1	1.35	2.71	1.3	2.38	2.19	2.84	2.71	0.83	6.37	1.74	12.46	1.44	3.93	4.72
ALG11	19.75	4.94	19.29	8.69	11.71	9.55	20.27	17.23	10.57	13.93	12.96	10.14	12.13	11.27	18.77	10.43	10.04	9.42	5.83	6.14	6.54	4.97	4.08	5.06	6.91	14.03	7.31	6.14	4.49	8.15	4.72	6.09	7.16	5.2	4.63	11.13	9.81	3.93	11.48	5.59	6.5	10.87	6.92	17.56	7.69	26.78	11.04	14.42	16.28
ALG12	20.97	17.46	27.51	34.05	70.45	15.47	110.98	23.7	14.76	32.63	22.57	15.99	14.88	61.54	25.31	21.49	48.8	25.59	74.9	46.28	51.42	40.37	26.34	28.61	17.37	41.73	47.54	29.3	22.39	38.1	38.25	39.85	36.87	31.2	23.79	123.97	69.83	38.15	46.69	33.54	19.61	39.04	57.25	52.75	48.73	21.78	37.91	40.34	27.75
ALG13	27.85	19.8	27.1	22.5	16.81	30.93	21.82	20.6	41.55	23.08	46.04	21.46	22.96	36.2	29.37	32.85	19.87	14.75	15.23	16.03	18.97	18.38	36.01	24.82	13.73	25.45	24.41	19.2	16.41	15.98	16.31	23.06	16.39	15.84	25.9	16.62	25.69	15.02	17.87	14.55	24.22	18.54	29.76	27.62	24.12	19.23	17.07	13.54	25.02
ALG14	40.51	21.71	29.76	33.62	18.71	20.56	14.74	36.38	19.06	17.14	31.12	24.01	27.56	23.58	44.56	22.96	32.54	13.52	24.9	27.89	37.82	20.44	12.7	21.24	18.29	10.1	29.94	19.15	26.12	31.15	27.2	23.1	20.19	31.43	18.4	24.48	32.29	22.52	27.35	27.64	31.46	22.17	21.29	21.17	22.52	24.84	15.8	20.52	19.61
ALG1L	1.4	0.44	3.65	2.24	8.99	2.55	1.47	4.52	21.34	2.2	5.56	3.78	9.73	5.5	1.9	2.89	2.51	6.65	11.5	6.91	2.04	1.34	4.83	21.83	6.24	14.19	5.43	1.5	0.68	13.81	1.78	6.68	0.36	9.1	15.09	3.32	6.63	4.51	6.27	7.92	6.61	1.26	0.73	6.21	20.43	4.19	0.31	8.52	0.18
ALG1L2	0.35	0.35	0.21	0.43	0.48	0.07	0.17	0.13	0.14	0.97	0.06	0.95	0.67	0.44	0	0.14	0.4	0.13	0.71	0.2	0.68	0.16	3.94	0.2	0.46	0.84	0.22	1.85	0.38	0.78	0.45	0.35	0.25	0.69	0.08	0.14	0.19	1.31	0.63	0.35	0.52	0.28	0.4	0.4	0.24	0.6	0.19	0.07	0.38
ALG1L9P	0.72	0.69	1.66	1.12	1.03	2.17	3.66	1.59	1.46	1.64	0.54	2.2	1.65	1.41	0.85	2.14	0.56	0.84	0.71	0.95	0.36	1.46	1.36	0.17	1.01	1.63	0.58	0.29	0.43	0.83	0.49	0.33	0.29	0.88	1.07	1.47	0.93	1.02	1.03	1.44	1.13	0.56	2.09	1.56	0.75	2.8	1.25	3.03	1.23
ALG2	49.33	21.15	25.02	25.7	39.28	32.14	27.09	42.68	28.14	43.33	38.42	42.56	25.7	50.25	31.48	40.88	49.95	23.19	25.18	36.38	30.92	37.37	35.05	58.09	20.95	40.05	27.54	27.49	22.22	30.36	30.46	30.82	31.57	30.42	26.1	22.72	27.41	29.38	35.21	15.82	29.65	29.62	51.54	29.46	37.28	55.21	55.24	45.51	37.24
ALG3	181.96	407.15	77.92	122.87	173.92	73.31	210.15	145.35	59.16	89.12	97.45	98.08	98.74	127.5	123.89	80.8	124.49	112.08	162.3	180.83	165.59	152.84	88.43	183.82	159.07	289.12	214.46	66.39	76.33	181.21	99.35	135.13	163.4	205.92	335.83	204.86	190.59	123.77	160.38	185.23	169.9	220	266.4	132.42	172.49	215.52	281.71	146.95	160.3
ALG5	186.68	88.35	115.42	77.01	83.59	88.32	165.43	151.73	121.21	73.54	87.38	79.61	118.65	103.2	145.19	76.46	89.51	28.38	34.97	74.19	68.6	55.94	36.96	72.81	64.81	51.26	55.58	53.46	71.14	99.72	53.17	60.28	75.69	81.88	74.83	59.37	49.13	49.69	62.38	33.97	80.95	80.95	68.78	64.57	62.11	61.15	78.07	50.97	62.52
ALG6	23.25	8.94	7.99	15.24	13.55	12.63	27.3	18.49	20.22	10.9	15	21.82	26.68	20.19	19.09	26.27	9	9.14	6.65	7.23	9.99	11.1	8.19	9.57	4.36	20.37	9.4	5.47	7.34	9.4	7.67	5.47	10.04	12.04	8.83	10.62	11.13	5.06	10.37	10.27	11.16	11.01	12.46	16.43	10.83	21.05	12.62	12.01	11.21
ALG8	122.9	30.89	70.5	89.83	60.62	45.82	114.01	69.41	46.61	45.51	54.83	103	77.81	78.68	70.45	67.56	36.92	33.1	35.13	50.14	56.45	33.07	42.53	35.98	173.32	60.85	40.24	31.53	26.32	56.73	35.52	33.51	58.38	43	95.4	62.2	40.08	28.66	45.89	90.24	135.35	90.78	116.58	47.72	48.14	92.78	97.49	75.56	70.33
ALG9	17.25	4.94	11.97	13.55	15.45	13.49	12.03	14.81	11.53	12.6	11.68	15.59	11.34	9.19	16.51	12.04	11.96	9.65	4.3	6.48	12.47	7.21	7.8	8.34	5.87	6.31	13.19	8.01	8.22	9.24	8.07	8.06	9.4	9.33	8.52	10.08	7.71	6.84	11.96	11.86	14.83	11.09	25.78	8.06	10.82	13.5	8.55	13.15	14.64
ALK	0	0.02	0.05	0.02	0.02	0.01	0.06	0.03	0.04	0.09	0.12	0	0.04	0.02	0.16	0.06	0.1	0.03	0	0.07	0.04	0.01	0.36	0.01	0.03	0.04	0	0	0	0.02	0.02	0.02	0.07	0.04	0.07	0.03	0.33	0.09	0.06	0.02	0.01	0.01	0	0	0.04	0.04	0.23	0.02	0.02
ALKBH1	10.94	10.25	8.77	22.42	12.79	10.01	20.16	13.5	15.48	10.61	13.66	12.81	12.29	12.75	13.32	11.04	10.01	10.19	9.88	10.37	13	12.75	11.79	12.1	11.53	19.07	11.29	7.48	6.32	12.67	7.69	6.79	11.59	13.41	7.9	7.85	8.59	9.45	11.06	15.38	9.81	13.35	14.2	11.69	10.58	23.47	17.18	17.47	14.5
ALKBH2	11.68	38.67	24.11	22.47	23.58	40.41	19.6	22.68	21.33	17.48	23.42	20.25	32.97	17.55	23.32	43.44	20.29	14.77	30.01	25.32	20.75	41.84	54.99	29.78	30.16	20.8	48.58	10.71	9.07	28.35	14.6	10.27	30.33	30.46	54.19	24.61	24.06	23.31	22.47	33.65	38.79	39.25	46.16	18.76	13.72	18.89	11.75	26.14	38.37
ALKBH3	18.24	14.08	32.91	9.96	7.62	19.43	36.85	20.74	21.13	17.66	29.68	22.14	27.03	24.48	28.96	17.97	28.57	27.2	23.27	22.57	36.2	28.72	27.73	24.33	21.07	27.72	35.79	22.74	17.2	29.82	22.82	16.68	14.81	10.34	20.88	25.18	25.06	23.54	10.65	3.45	11.3	29.03	35.43	17.63	16.4	18.26	25.68	18.46	31.14
ALKBH3-AS1	0	0.04	0.16	0.05	0.03	0.19	0.16	0.15	0.15	0.42	0.13	0.21	0.24	0.21	0.09	0.13	0	0.06	0.13	0	0.05	0.07	0.09	0	0.03	0.04	0	0	0.09	0.03	0.08	0.06	0.04	0	0	0.03	0.08	0	0.07	0	0.06	0.03	0.11	0.18	0.14	0.2	0.14	0.15	0.11
ALKBH4	8.13	9.99	3.65	8.89	11.32	5.4	6.01	5.23	7.01	6.2	4.68	5.6	7.1	2.83	5.83	4.72	7.91	6.94	19.65	11.21	13.2	15.02	10.75	8.42	18.4	18.98	24.15	6.39	4.79	10.22	10.63	5.18	10.73	12.33	10.83	16.95	11.47	10.95	10.21	15.19	13.33	13.97	15.16	13.35	10.59	8.43	11.11	12.9	12.42
ALKBH5	25.82	29.16	33.7	48.57	70.23	43.11	71.3	36.6	42.14	40.97	42.65	44.36	18.78	43.85	28.82	46.07	51.08	36.81	39.47	30.23	42.56	43.64	47.45	37.28	56.63	78.45	51.52	38.27	33.87	39.33	37.17	41.59	38.97	46.98	39.93	45.09	38.53	42.63	58.17	32.72	42.64	42.51	39.25	27.94	58.26	91.47	75.54	82.23	109.1
ALKBH6	19.21	33.24	15.13	12.52	21.33	16.54	32.85	21.73	15.52	15.45	13.05	11.92	14.69	23.71	11.48	18.88	20.06	16	37.87	25.7	16.49	41.85	29.65	30.97	23.79	41.09	26.21	19.66	10.6	17.12	24.09	27.01	44.76	21.63	29.84	24.62	38.22	19.15	18.73	25.44	44.85	18.75	26.16	24.23	28.94	38.33	38.87	21.22	23.78
ALKBH7	18.05	140.44	18.83	17.7	71.22	17.86	25.67	26.73	14.37	24.96	38.69	16.55	29.25	15.41	23.57	33.92	49.79	51.72	58.83	69.61	102.22	122.23	131.17	57.01	57.85	45.84	74.08	71.34	155.99	57.08	94.71	112.12	64.28	70.52	82.14	42.55	115.77	99.76	52.93	28.78	35.72	132.05	69.63	21.65	61.85	22.17	60.06	43.82	41.3
ALKBH8	4.91	1.63	8.41	5.44	2.92	6.15	5.97	6.8	4.99	5.55	5.25	4.91	6.23	5.74	6.59	4.6	2.83	3.79	1.13	2.74	3.84	2.54	3.44	2.79	2.61	3.02	4.72	2.24	1.05	3.56	2.57	1.48	2.14	2.87	5.28	4.49	3.9	2.59	4.7	6.83	7.28	2.8	5.5	2.75	2.35	4.69	4.22	9.29	7.15
ALLC	0	0.05	0.13	0	0	0	0.05	0.04	0	0.04	0.03	0	0.08	0.29	0.12	0.05	0.06	0	0.13	0.23	0.04	0	0	0	0	0.23	0	0	0	0	0	0.15	0.16	0.04	0.05	0	0	0.19	0	0	0.04	0	0	0	0	0.48	0	0	0
ALMS1	6.16	2.24	6.97	5.76	6.09	5.56	6.2	11.82	8.35	8.46	6.09	6.93	6.9	12.92	12.15	16.85	3.57	3.48	2.46	2.16	4.8	4.88	4.07	3.08	2.69	11.64	4.14	2.63	1.92	3.61	2.19	2.14	3.25	4.5	3.18	3.01	4.08	3.14	5.08	3.55	6.55	4.75	5.52	12.03	4.46	9.68	3.63	11.92	7.3
ALMS1-IT1	0.68	0.31	1.62	2.18	0.59	1.03	0.39	0.46	0.64	0.21	0.39	0.54	0.7	1.29	0.94	1.43	0.36	0.2	0.35	0.05	0.14	0.08	0.54	0.05	0.4	0.71	0.31	0	0	0.24	0.17	0	0.3	0.13	0.63	0.62	0.27	0.28	0.14	0.46	0.31	0.24	0.12	0.34	0.15	0.22	0.78	0.76	2.02
ALMS1P	0	0.05	0.42	0.03	0.07	0.08	0.24	0.81	0.41	0	0.09	0.04	0.07	0.59	0.32	0.49	0	0.07	0.08	0.15	0.13	0.04	0.05	0.23	0	1.62	0.04	0	0	0.68	0	0.27	0.05	0	0.04	0.04	0.07	0.04	0	0.25	0.15	0.11	0.17	0.53	0.06	0.24	0.03	0.44	0.07
ALOX12	0.13	0.16	0.2	0.29	0.34	0.31	0.22	0.34	0.89	0.39	0.1	0.2	2.7	0.28	0.42	4.31	0.15	107.65	0.6	0.41	0.23	0.55	0.29	0.08	7.62	0.14	0.41	0.1	0.21	1.95	0.28	0.09	0.09	0.2	0.55	0.23	0.11	0.24	0.32	0.12	0.15	0.2	0.06	2.52	0.22	0.37	0.14	0.24	0.28
ALOX12-AS1	2.24	1.78	1.38	2.62	2.52	1.43	4.06	3.14	3.54	3.1	1.77	1.15	1.35	2.78	3.34	3.57	1.12	1.59	4.29	2.02	2.47	3.83	1.82	1.29	1.8	3.79	2.36	0.84	3.54	5.91	3.22	1.87	2.97	3.47	3.53	4.16	1.77	2.2	2.22	3.46	2.45	1.36	0.84	3.28	2.34	3.55	2.57	3.23	5.76
ALOX12B	0.18	0.03	0.31	0.43	0.11	0.15	0.24	0.25	1.32	0.02	0.21	0.19	0	0.5	0.02	0.15	0.4	9.9	0.29	0.22	0	4.63	47.18	3.84	1.34	1.37	0.99	0.1	0	1.71	0	0	1.77	0.14	0.19	0.21	0.14	0.78	0	1.15	4.52	0.05	0	0.47	0.21	1.27	0.04	3.59	0.02
ALOX12P2	0.46	0.07	2.46	0.98	0.32	0.18	0.24	0.08	6.67	0	0.05	0.02	0.03	0.02	0.06	0.33	0.04	0.59	0.14	0.22	0.08	0.32	0.08	0.04	0.07	0	0	0.43	0.08	0.13	0	0.05	0	0.1	5.9	0.29	0.4	0.34	0.02	0.18	0.19	0.28	0.06	3.72	0.47	0.2	0.04	1.83	0
ALOX15	16.02	0.37	0.67	0.09	0.5	0.22	0.08	0.94	4.22	1.98	0.09	0.42	0.04	0.68	1.52	0.51	0.55	0.77	0.76	0.03	0.51	1	0.1	0.17	0.24	21.6	0.04	0.7	0.18	0.46	0.31	0.7	0.19	2.09	6.24	0.02	0.38	0.32	1.57	0.68	2.95	0.04	0.07	1.97	0.49	10.35	0.2	0.29	0.08
ALOX15B	0.37	1.25	3.43	0.59	4.46	0.71	0.4	1.31	2.23	1.82	2.5	1.77	1.21	0.84	3.52	8.98	1.15	43.78	0.64	2.72	1.63	4.87	2.33	1.21	1	1.04	0.29	2.35	0.13	1.6	0.86	7.65	5.93	1.49	1.09	0.7	3.25	11.9	3.09	0.51	0.63	0.23	0.38	0.95	1.22	0.39	12.22	13.49	1.13
ALOX15P1	0	0.26	0.11	0	0.09	0	0.42	0.21	0.11	0.11	0	0	0	0.55	0.1	0.35	0.54	0.34	0.11	0	0	0.48	0.25	0.9	0	1.08	0.1	0.4	0	0.15	0.32	0	0	0.13	1.04	0.21	0.27	0.42	0	0.2	0.11	0	0	0.56	0.69	0.25	0.1	0.31	0
ALOX5	12.33	17.77	34.05	10.36	11.74	13.2	5.09	19.03	9.88	52.88	25.29	27.65	15.45	18.66	27.62	20.99	23.15	19.52	20	29.26	13.45	47.45	58.45	53.2	13.16	2.62	2.64	25.87	9.3	36.15	34.59	16	14.25	53.46	61.83	9.58	29.45	51.23	22.93	50.17	44.03	7.49	7.8	45.63	61.69	12.44	43.39	87.23	4.06
ALOX5AP	206.29	127.32	32.6	75.52	111.21	82.16	40	84.86	41.31	132.71	135.18	41.78	93.88	177.37	143.57	210.75	43.15	46.61	149.85	50.57	63.86	145.22	124.57	145.77	108.45	6.59	19.15	74.34	49.98	57.62	84.73	101.25	84.75	48.28	30.32	53.77	166.36	202.49	214.2	72.78	30.61	35.65	22.08	72.48	443.02	54.31	169.91	96.08	33.95
ALOXE3	0.02	0.09	0.04	0.06	0.13	0.26	0	0.09	1.26	0.16	0.25	0.2	0.05	0.21	0.03	0.17	0.99	2.07	0.11	0.41	0.09	0.08	1.37	5.1	0.68	0.82	0.11	0	0	0.39	0	0.13	1.01	0.25	0.16	0.25	0.03	0.36	0.7	1.59	0.65	0.04	0.32	0.13	0	0.49	0.07	0.51	0.51
ALPI	2.81	0.02	5.21	20.22	1.01	0.02	0.05	2.42	1.9	0.27	11.07	0.1	0.31	1.03	0.05	0.89	1.41	0.05	0	0.1	10.62	0	0.18	0	0.1	0.05	0	0.36	345.62	5.62	0.07	16.61	0.2	6.66	0.37	0.05	1.77	10.16	0.19	0.07	4.68	14.19	0.3	3.1	1	0.47	0	6.05	0.05
ALPK1	8.76	4.71	9.31	4.29	4.33	3.57	3.25	4.96	5.47	12.5	11.16	7.15	11.61	6.64	12.71	6.57	3.79	6.35	5.12	6.56	6.19	12.22	9.4	6.5	4.59	2	6.11	3.72	2.61	5.81	4.84	3.88	7.25	3.58	7.98	16.36	7.34	4.95	7.09	10.4	4.9	2.52	4.62	5.47	2.84	9.55	9.25	4.34	4.54
ALPK2	0.27	0.47	0.2	0.34	0.66	1.64	0.21	0.58	0.34	0.99	1.39	0.31	0.37	1.66	0.94	0.57	0.43	0.42	0.29	1.53	0.3	0.71	3.1	0.24	0.36	0.22	0.04	1.37	0.22	0.25	0.27	0.38	0.28	0.44	0.06	0.1	1.07	1.41	2.4	0.4	0.36	0.22	0.36	0.38	0.86	0.52	0.81	2.54	0.33
ALPK3	0.74	1.45	2.07	0.69	1.29	0.99	2.44	1.34	16.31	3.85	1.11	0.81	1.49	6.79	2.75	1.92	1.38	1.97	1.71	5.4	1.52	1.67	1.63	0.85	0.88	16.29	0.69	1.5	0.57	1.08	0.59	1.41	0.85	2.12	10.96	2.39	2.76	2.56	6.04	16.8	2.72	1.22	0.91	4.21	4.24	62.56	2.81	22.97	1.55
ALPL	5.83	10.85	1.25	5.39	7.55	3.12	46.54	7.34	11.74	50.91	11.59	4.89	4.07	11.95	6.8	7.55	12.88	17.78	61.92	11.26	15.42	10.21	7.05	4.99	5.67	10.06	1.36	6.23	2.81	5.55	7.23	6.73	2.72	8.47	3.23	7.92	23.75	23.04	26.24	3.22	4.88	10.43	8.59	4.08	31.91	5.29	2.95	13.46	2.5
ALPP	0.06	0.53	4.43	1.46	0.47	1.66	0.12	0.52	1.39	0.02	0.02	0.43	0.31	0.75	0.06	0	0	0	1.15	0.38	0.18	0.72	0.33	1.3	23.98	0.09	0.08	0	0	2.2	0	0.2	2.49	0.8	0.58	0.14	0	0.05	0.48	3.04	23.22	151.3	0.02	0.81	0	0.31	0.04	0.06	1.06
ALPPL2	0.24	0.51	9.25	14.35	51.49	0.09	0.15	1.09	0.29	0.39	0.15	5.34	1.98	10.06	0.16	0.2	0.18	0.09	0.03	1.55	0.73	0.06	2.57	0.66	15.87	0.06	0	0.1	1.14	11.37	0	0.86	14.4	2.93	1.06	0.12	0.04	0.17	2.56	0.37	192.26	1156.74	0.03	5.44	0.07	1.25	0.88	0.52	0.83
ALS2	19.19	6.48	21.96	17.93	13.95	15.92	42.33	18.81	14.82	19.05	11.81	20.17	16.32	17.14	13.66	18.65	9.44	7.66	10.72	6.95	5.24	11.02	6.56	5.71	5.53	19.52	12.79	4.48	6.27	7.87	6.33	5.13	8.04	6.38	12.28	11.37	10.24	6.31	13.16	11.85	14.07	7.1	7.42	13.67	6.36	19.58	13.34	11.04	23.82
ALS2CL	6.26	5.49	7.98	8.97	14.13	26.44	16.72	7.46	3.88	6.69	3.82	4.33	18	13.21	5.05	7.9	8.55	36.39	16.1	4.15	4.12	11.29	4.91	5.6	12.13	1.39	4.32	3.06	2.5	6.48	2.87	5.82	3.44	3.34	22.41	9.48	5.14	4.48	13.91	12.72	10.32	8.2	3.09	12.43	0.99	20.92	2.94	6	0.34
ALS2CR11	0.01	0.03	0.09	0.06	0.13	0.09	0.62	0.22	1.25	0.2	0	0.04	0.08	0.13	0.17	0.22	0	0.06	0.35	0.15	0.06	0.08	0.1	0.21	0.1	1.22	0.02	0	0	1.06	0	0	0	0	0.57	1.46	0.12	0.1	0.17	0.26	0.34	0.37	0.04	0.1	0.57	0.19	0.11	1.76	0.23
ALS2CR12	0.32	0.04	0.48	0.28	0.06	0.03	0.3	0.29	0.71	0.38	0.11	1.27	0.17	0.35	0.35	0.14	0.1	0.03	0.1	0.04	0	0.27	0	0.1	0.13	0.08	0	0	0	0.07	0.09	0.06	0.04	0.07	0.04	0.07	0.15	0.16	0.25	0.12	0.1	0.07	0.04	0.7	0.1	0.95	0.22	0.36	0.09
ALX1	2.3	0	2.06	0	0	0	0	0.14	0.14	0	0	0	0	0.04	0	3.63	0	0	0	0.19	0	0	0	0	0	2.33	0	0	0	0.19	0	0	0	0	0	20.93	0.74	0.22	0	0.09	7.06	0.19	0	0	0	0	0.04	1.32	0
ALX3	1.23	0.54	0.72	1.05	0.91	1	1.87	1.21	1.61	1.59	0.17	0.76	1.31	0.82	2.68	2.74	1.2	1.02	1.33	0.78	0.8	1.58	1.13	0.69	0.3	2.8	1.23	0.33	0.93	1.28	0.94	0.15	0.36	1.49	1.19	3.22	0.69	0.97	1.95	1.11	1.47	0.53	1.07	3.22	0.73	4.4	0.5	1.81	1.42
ALX4	0.01	0.01	0.02	0.01	0.01	0.01	0.13	0.02	1.36	0.07	0	0.02	0.02	0.04	0.05	0.01	0.06	0.01	0	0.01	0.04	0.01	0.02	0.4	0.01	0.06	0	0.04	0.09	0.05	0.01	0.02	0.03	0	0.06	0.04	0.04	0.05	0	0.02	0.03	0	0.05	0.03	0.11	0.1	0.04	0.28	0.03
ALYREF	76.72	147.99	56.38	93.81	156.81	65.05	138.81	72.28	62.14	34.64	77.36	101.83	46.02	42.44	42.63	72.02	90.01	85.14	87.56	177.11	126.26	151.62	203.9	153.91	231.3	165.38	190.59	58.82	56.8	127.24	60.03	84.4	118.41	171.71	124.6	86.75	91.12	85.11	90.26	112.67	68.81	118.92	107.11	94.34	75.26	167.04	119.65	126.7	154.89
AMACR	517.91	4.62	29.75	9.57	62.39	18.85	28.41	34.11	20	42.12	23.58	75.36	91.25	12.61	53.54	14.38	12.89	20.64	163.11	9.78	81.21	11.04	11.43	17.2	5.43	121.85	15.73	8.69	11.86	10.13	11.84	30.2	11.92	23.45	9.51	20.05	70.14	10.24	14.8	7.1	16.52	22.72	65.04	49.43	46.19	308.51	55.32	22.42	22.84
AMBN	0	0	0	0	0.08	0	0.38	0	0	0	0	0	0.03	0	0	0	0	0.03	0	0	0	0	0	0	0	0.04	0	0.12	0	0	0	0.05	0	0	0.07	0	0	0	0.03	0	0	0	0	0	0	0.12	0.03	0	0
AMBP	2.36	0.28	3.31	9.78	3.29	0.44	1.15	1.07	3.49	0.75	0.03	0.29	1.71	33.85	5.89	0.78	1.42	0.79	8.91	0.51	1.32	0.1	0.67	0	0	0.23	2.38	2.38	1.07	27.77	3.57	1.51	0.16	0.62	0.73	1.37	1.14	2.22	2.83	0.49	6.85	8.83	0.57	4.9	14.05	1.87	0.08	0.08	0.24
AMBRA1	19.5	15.69	22.25	15.11	10.01	12.28	29.78	21.88	12.24	19.75	14.52	14.48	20.82	14.03	19.18	9.54	15.88	21.91	24.28	20.61	18.67	16.04	19.02	7.05	10.93	15.74	17.96	10.07	11.44	27.17	11	14.41	16.49	24.23	12.41	61.26	20.09	18.69	24.05	21.67	20.97	17.52	17.8	25.15	25.78	32.88	19.74	28.91	25.67
AMD1	104.46	54.26	119.33	124.89	169.09	108.64	49.87	109.7	63.06	57.56	127.33	111.87	78.68	47.56	78.66	118.78	102.49	99.63	35.86	29.43	71.56	52.93	62.88	69.72	43.68	48.98	69.7	38.04	47.49	26.71	36.75	35.48	66.09	49.37	73.09	30.57	44.19	36.91	72.93	36.83	78.34	72.08	134.74	92.62	55.4	141.71	52.17	107.12	90.38
AMDHD1	0.19	0.33	0.39	0.23	0.58	0.2	3.34	0.96	0.38	0.34	0.27	1.48	0.24	0.29	1.83	8.44	0.25	0.22	0.11	1.05	0.3	0.29	0.32	0.8	0.23	0.81	0.14	0.22	0.31	1.16	0.42	0.1	0.14	0.19	0.1	3.23	1.14	0.1	0.23	0.24	22.17	0.14	0.03	1.3	0.21	1.44	0.15	6.75	0.13
AMDHD2	7.97	24.6	6.24	11.25	28.17	6.21	9.43	10.67	6.87	13.03	7.38	4.89	7.96	12.22	14.46	7.86	8.93	12.67	30.9	23.59	20.3	17.26	10.39	9.34	21.44	19.61	15.96	11.15	12.49	17.34	10.52	10.65	12.92	22.06	11.94	31.29	19.11	27.06	14.7	33.85	15.66	15.9	22.9	10.94	19.7	3.55	13.16	15.63	4.79
AMELX	0	0	0	0	0	0	0	0	0	0.19	0	0.3	0.28	0	0	0.1	0	0	0.28	0	0.08	0	0	0.13	0	0	0.09	0	0	0	0	0	0.45	0.17	0	0	0	0	0	0.09	0	0	3.07	0	0	0.19	0.16	0.16	2.19
AMELY	0	0	0	0	0	0	0	0	0	0	0	0	0	0	0	0	0	0.16	0	0	0	0	0	0	0	0.68	0	0	0	0	0	0	0	0	0	0	0	0	0	0	0	0	0	0	0	0	0	0	0.08
AMER1	4.38	1.9	4.1	2.55	0.72	3.8	4.84	3.35	2.85	3.9	3.35	4.23	4.2	2.84	4.33	3.19	3.1	5.54	3.18	2.22	4.16	8.29	3.74	2.94	1.61	7.99	3.93	2.42	2.87	2.91	1.91	2.22	2	3.85	2.12	2.8	3.25	3.46	3.61	2.09	3.89	3.71	6.87	3.59	4.16	8.55	0.92	5.82	5.49
AMER2	0.01	0.05	0.54	0.12	0.03	0.55	0.5	0.04	0.11	0.14	0.03	0.75	0.16	0.11	0.08	0.47	0.03	0.01	0.04	0.03	0.01	0.05	0.02	0	0.08	0.06	0.05	0.02	0.03	0.03	0.05	0.04	0	0.04	0.01	0.02	0.02	0.03	0.07	0.01	0.01	0.04	0.06	0.03	0.02	0.03	0.08	0.21	0.23
AMER3	0	0	0.16	0	0.03	0.08	0.08	0	0.05	0.02	0	0.17	0.01	0.01	0.15	0.06	0.24	0	0	0.05	0	0	0.01	0	0.04	0	0	0.15	0.21	0.13	0.33	0	0	0.13	0.14	0	0.2	0.01	0	0	0	0.18	0	0.16	15.71	0.06	0.02	0.58	0.02
AMFR	42.97	45.5	45.4	58.82	43.34	35.83	47.88	34.89	48.58	74.03	48.6	35.87	39.84	36.75	49.85	42.7	39.5	67.99	32.18	84.41	67.4	57.71	44.95	33.73	30.14	93.01	49.05	38	69.23	58.31	33.59	32.5	37.61	71.97	50.16	163.5	137.54	60.91	67.91	92.23	52.27	44.07	58.34	107.39	53.61	68.22	66.39	51.22	60.68
AMH	0.22	4.06	0.32	0.05	15.46	5.96	0.15	0.33	5.12	0.62	0.73	0	5.12	0.15	0.05	0	1.01	0.17	0.24	1.29	14.07	2.07	9.43	1.49	0.76	1.43	0.86	0.23	0.24	0.12	0.51	0.05	5.5	1.38	5.51	0.18	0.71	0.88	3.6	0.36	2.19	1.26	0.81	0.61	1.92	20.28	1.98	4	17.15
AMHR2	0	0.17	0.04	0.1	0	0	0.12	0.19	0.08	0.32	0.1	0.04	0	0	0.27	0.08	0.41	0.1	0.08	0.09	0.2	0	0.7	0.12	0	0	0	0.78	0.3	0.24	0.45	0.21	0.25	0.26	0.19	0.08	0.11	0.53	0.28	0.06	0.42	0.7	0	0.05	0.19	0.04	0	0.47	0.09
AMICA1	12.53	9.52	10.78	7.54	7.99	3.18	1.66	13.87	7.19	48.51	4.11	3.01	9.36	7.05	28.7	19.98	15.96	14.97	10.21	12.91	22.7	28.85	27.43	9.54	6.06	0.85	3.77	20.34	8.33	14.48	18.12	19.51	9.9	10.36	6.23	3.94	15.8	55.72	21.52	6.49	7.73	9.41	1.11	6.25	27.52	11.17	33.06	11.32	5.4
AMIGO1	3.62	3.66	2.6	2.11	2.31	2.08	6.16	5.7	10.36	4.69	2.81	2.37	1.69	3.08	10.22	2.44	3.56	2.38	4.24	3.38	3.72	3.77	1.3	1.9	1.52	6.46	4.57	4.4	3.94	10.44	2.17	2.88	0.27	5.72	1.98	13.52	5.89	5.82	2.13	3.52	4.35	6.9	6.84	11.43	5.51	7.42	0.41	6.92	0.46
AMIGO2	3.66	9.06	56.21	40.99	15.64	15.04	20.19	12.05	6.43	7.46	16.84	32.04	2.52	9.42	8.18	8.31	3.01	4.4	9.22	14.67	2.19	12.16	3.46	3.45	120.67	1.9	0.63	2.67	2.7	3.89	2.09	1.76	12	7.23	9.77	49.6	46.96	7.33	12.14	237.01	8.87	2.48	21.32	10.8	12.8	15.08	7.71	17.13	14.16
AMIGO3	2.32	1.56	1.34	1.6	4.95	2.12	5.21	1.55	7.73	2.07	2.12	2.32	1.29	2.7	2.71	1.88	7.51	3.19	4.28	1.76	4.72	4.23	5.03	1.01	1.96	5.92	2.63	4.02	3.08	6.51	4.28	2.66	3.56	1.54	2.3	4.55	4.02	3.86	4.63	0.98	3.1	3.53	1.51	5.4	6.79	6.88	6.17	3.14	5.34
AMMECR1	15.35	6.1	20.76	14.03	13.82	22.56	10.43	12.32	12.08	7.41	18	18.93	9.62	17.94	11.42	12.84	10.89	16.1	5.15	5.73	6.5	7.93	4.61	6.12	6.13	11.06	10.91	4.35	4.08	6.85	4.87	6.49	7.07	8.15	8.35	8.51	9.05	5.48	14.54	9.21	10.75	6.72	25.92	14.68	9.42	26.14	11.08	3.19	8.78
AMMECR1L	13.33	11.69	18.01	14.41	15.96	16.6	9.79	17.78	17.59	18.23	14.1	19.05	15.69	13.47	16.97	17.4	8.85	12.29	18.76	8.86	10.64	10.68	7.77	9.02	6.03	19.36	11.76	5.74	6.98	9.59	6.91	7.77	6.62	10.64	18.34	14.81	11.47	8.67	16.62	15.79	13.98	9.3	24.12	16.68	8.71	21.55	7.25	21.59	10.26
AMN	10.99	99.23	15.17	13.78	102.28	52.04	0.1	20.45	18.22	67.29	30.87	10.25	33.64	6.53	19.56	6.61	49.56	12.92	13.66	49.66	321.64	1.97	53.58	30.63	15.84	2.14	100.75	14.5	169.04	158.3	41.96	147.88	188.48	90.17	7.32	21.13	75.01	45.38	80.73	4.29	49.67	73.2	13.78	61.45	6.11	3.91	4.35	80.79	19.64
AMN1	8.61	5.38	4.8	7.62	4.58	11.39	9.94	4.85	6.78	12.09	8.25	7.77	4.72	16.55	10.41	7.09	6.92	5.03	3.36	4.02	4.22	4.84	4.45	3.67	5.78	4.06	3.11	5.01	2.4	2.4	5.04	3.09	2.21	3.52	6.06	12.63	10.37	4.14	5.18	7.33	3.28	3.76	2.13	5.09	5.19	2.21	5.25	5.16	4.61
AMOT	19.03	4.53	5.14	1.36	8.31	1.68	13.3	1.95	5.16	4.09	4.53	5.57	6.17	5.11	15.29	7.72	5.28	3.97	9.42	5.69	7.65	3.76	2.21	2.11	0.66	17.99	7.9	3.02	3.32	4.4	4.3	4.19	10.13	8.51	2.01	3.95	10.38	4.62	7.43	4.11	16.06	6.44	35.3	18.71	7.74	33.91	4.71	1.11	35.84
AMOTL1	2.18	3.96	15.32	7.65	17.85	8.8	7.77	12.22	14.67	39.33	7.49	15.62	24.02	27.56	23.03	13	5.42	33.8	5.67	15.12	4.94	8.18	8.32	7.37	7.58	39.24	1.44	3.48	4.91	3.59	4.33	3.65	10.1	7.45	15.03	16.69	12.12	14.71	25.83	7.16	40.2	8.95	26.69	9.7	39.21	20.23	13.15	27.98	12.2
AMOTL2	14	13.27	21.12	12.83	24.27	18	14.49	11.53	24.06	16.01	19.37	11.81	7	12.68	25.12	14.88	18.99	65.03	22.95	24	19.21	21.97	27.67	33.14	15.68	7.57	16.18	14.35	7.33	20.37	14.22	8.15	24.64	25.46	12.14	37.94	19.51	32.26	31.02	66.49	13.09	37.49	11.46	13.18	12.44	30.85	26.7	41.2	44.66
AMPD1	0.13	0.74	0.17	0.02	0.38	0.08	0	2.76	0.79	0.73	0.28	0.03	0.02	0.08	1.98	1.25	6.58	0.24	0.48	0.36	1.15	0.34	0.81	0.22	0	0.07	0.13	6.15	11.29	6.14	7.06	2.11	0.21	3.49	0.03	0.15	1.11	1.38	0.08	0.09	0.07	2.21	0.06	0.14	0.65	0.18	1.65	1.01	0.18
AMPD2	35.13	24.41	23.68	32.09	39.01	26.01	21.83	48.16	19.39	41.48	20.82	23.64	32.92	21.03	29.86	28.44	24.32	17.12	41.52	33.9	37.57	26.61	34.51	11.32	17.53	17.9	58.66	10.98	13.49	40.83	14.47	19.94	18.18	55.95	16.64	59.03	34.65	34.94	51.47	34.3	30.22	30.48	33.37	78.2	41.92	40.5	19.6	45.51	37.94
AMPD3	6.24	4.5	10.2	3.23	6.99	5.88	2.61	8.04	6.47	14.94	11.59	3.89	10.69	16.45	11.32	12.73	6.95	8.05	10.05	9.56	8.68	7.19	20.03	7.83	5.34	5.43	3.79	7.72	4.29	5.43	6.27	8.66	4.9	7.98	5.39	12.97	8.48	17.76	13.23	12.9	12.02	6.12	7.64	7.78	15.77	6.85	13.29	14.49	2.2
AMPH	0.36	0.88	0.77	0.41	2.18	1.28	0.74	1.9	1.33	4.59	0.71	2.14	0.49	3.51	3.18	1.52	1.73	1.54	0.8	2.54	0.8	0.37	1.33	0.24	0.48	0.73	0.38	0.86	0.6	0.88	1.49	2.22	0.44	1.72	1.05	1.96	2.09	2.39	6.22	1.33	0.32	1.47	0.36	1.37	2.64	2	0.82	3.44	0.47
AMT	12.85	4.71	8.52	3.56	6.74	2.68	8.69	9.7	16.02	9.42	4.91	18.83	6.19	2.69	6.24	2.49	6.74	2.36	2.7	2.52	0.74	1.33	11.52	0.37	3.35	1.37	8.99	10	12.72	11.47	12.45	6.39	0.63	0.46	2.09	1.12	3.65	1.11	2.1	0.74	7.4	8.65	0.56	26.46	2.36	19.65	2.48	23.62	9.3
AMTN	0.33	0	0	0	0	0	0	0	0.13	0	0	0	0	0.11	10.46	33.05	0	0.43	0.19	0	0.05	0	0	0	0.11	0.09	0.06	5.75	0	0.13	26.36	4.23	0	0	31.2	0	0.11	0.07	0	0	0	0	0	0	0.18	0.46	0.18	0.06	0
AMY1A	0	0	0.07	0	0	0	0	0	3.83	0	0	0	0.04	0	0	0	0	0	0	0	0	0	14.26	0	0.08	0	0	0	0	0	0.04	0	0	0	0	0	0	0	0	0	0	0	0	0	0	0	0.03	0	0.03
AMY1B	0	0	0	0	0	0.15	0	0	1.53	0	0	0.08	0	0	0	0.28	0	0	0	0	0	0	1.43	0	0	0	0	0	0	0	0	0	0	0	0	0	0	0	0	0	0	0	0	0	0	0	0	0	0
AMY1C	0	0	0	0	0	0	0	0	0	0	0.06	0	0	0	0	0	0	0	0	0	0	0	0	0	0	0	0	0	0	0	0	0	0	0	0	0	0	0	0	0	0	0	0	0	0	0	0	0	0
AMY2A	0	0	0	0	0.04	0.04	0	0	0.13	0	0.07	0.09	0	0	0.08	0.06	0	0	0	0	0	0.1	0	0	0	0	0	0	0	0.04	0	0	0	0	0.05	0	0.04	0	0	0	0	0	0	0	0	0	0	0.03	0.07
AMY2B	0.73	0.42	3.03	1.5	0.7	3.59	20.24	5.31	10.2	4.65	1.49	7.2	11.87	4.93	7.05	7.5	1.57	1.85	1.2	1.64	0.88	1.27	1.24	0.92	0.36	0.18	0.65	1.39	0.22	1.36	1.16	0.76	0.76	0.39	2.96	0.21	0.66	0.65	2.02	0.81	2.13	1.17	1.34	2.76	0.74	2.17	1.99	2.38	0.65
AMZ1	0.04	0.11	0.15	0.05	0.23	0.35	0.07	0.16	0.27	0.24	0.57	0.12	0.17	0.2	0.08	0.25	0.2	0.03	0.17	0.42	0.15	0.58	0.66	0.25	0.46	0.15	0.16	0.28	0.2	0.14	0.07	0.38	0.41	0.4	0.13	0.08	0.27	0.44	0.79	0.5	0.17	0.1	0.26	0.12	0.47	0.43	1.04	0.7	0.06
AMZ2	94.82	77.23	40.97	46.58	71.34	63.57	232.93	64.08	77.94	51.91	50.32	89.4	49.91	73.02	69.85	106.5	38.92	46.14	45.32	70.58	35.85	56.88	65.38	62.79	85.8	110.29	45.65	46.6	26.68	88.32	50.96	30.87	44.53	58.03	132.13	65.27	64.39	45.94	35.4	103.39	42.87	104.77	52.56	88.82	59.3	95.76	56.97	39.3	71.91
AMZ2P1	5.51	2.21	2.32	1.61	5.61	4.71	25.92	2.4	2.68	4.69	2.19	4.22	2.22	9.67	6.28	4.75	1.39	1.45	1.64	4.5	1.58	1.89	3.15	2.01	2.31	5.64	1.41	2.57	1.26	2.78	2.64	1.19	1.67	1.85	2.68	5.65	3.46	2.57	1.74	3.64	1.27	2.23	2.71	5.42	3.45	1.79	2.59	2.06	4.06
ANAPC1	48.41	11.36	46	49.98	24.84	36.66	36.1	40.24	22.29	22.4	34.52	40.33	36.74	25.67	31.53	32.78	15.78	16.54	19.34	10.24	14.76	13.54	14.3	11.3	16.59	26.95	22.47	7.85	6.14	13.53	6.79	7.81	16.38	14.23	14.9	13.91	15.62	11.02	19.99	15.2	32.06	17.51	30.25	42.67	11.37	45.02	18.91	34.49	34.38
ANAPC10	25.98	12.6	18.02	16.56	13.13	25.7	19.98	18.23	21.25	16.68	19.49	19.84	20.88	37.69	19.83	21.89	11.14	8.84	7.51	21.43	13.31	15.38	18.2	23.31	15.69	25.48	12.78	11.28	10.32	11.07	11.35	9.78	13.54	19.41	23.3	15.01	8.9	13.31	12.14	18.59	13.66	15.66	14.26	8.54	10.25	27.8	12.52	10.33	11.35
ANAPC11	171.94	226.73	96.05	112.43	197.78	70.63	253.42	66.59	162.73	86.31	83.54	138.5	99.44	198.62	85.48	115.13	96.71	94.83	175.3	162.71	108.17	117.34	210.91	219.16	330.79	480.45	113.83	113.33	118.88	214.04	135.02	128.34	183.3	188.06	252.58	130.55	161.6	137.16	103.11	141.76	104.98	186.38	109.9	122.64	145.55	231.12	143.55	77.81	138.52
ANAPC13	289.96	73.97	72.21	121.18	75.09	157.15	240.26	146.08	168.04	186.29	105.8	131.12	135.67	177.19	202.57	210.89	121.17	65.58	75.19	110.19	85.12	70.43	63.68	178.05	33.86	149.73	124.02	84.57	83.27	111.5	115.18	63.11	61.04	97.58	111.95	143.03	110.61	59.02	106.68	116.54	94.14	75.2	85.22	98.92	76.52	79.23	79.69	98.18	138.43
ANAPC15	59.32	76.12	76.95	56.93	43.06	47.67	75.26	69.96	30.77	47.07	62.16	73.51	59.51	43.17	94.68	51.52	67.65	40.5	65.32	63.97	109.64	52.69	70.89	69.62	133.46	122.78	98.4	56.83	62.94	81.47	63.07	68.04	71.13	74.97	99.16	32.61	62.03	75.19	59.64	53.64	65.05	61.41	74.53	34.9	83.4	22.67	40.47	55.72	69.58
ANAPC16	28.34	42.13	54.98	30.55	41.76	46.57	79.35	104.93	61.99	46.33	31.53	34.36	43.89	35.88	59.85	56.14	43.09	42.97	24.52	51.78	51.02	40.25	58	51.68	50.15	77.14	47.35	48.66	40.43	71.36	54.08	38.96	36.46	42.43	73.6	25.9	49.1	52.12	38.34	74.63	50.25	31.65	29.57	54.14	45.99	48.23	45.11	33.25	49.58
ANAPC1P1	0	0.1	0.1	0.03	0.07	0.14	0.18	0.22	0.26	0.2	0.03	0.17	0.11	0.03	0.04	0.04	0	0.15	0.15	0	0.12	0	0	0	0.07	1.1	0	0	0.11	0.07	0.04	0	0.05	0	0.01	0	0.06	0	0	0	0.04	0.04	0.09	0.17	0.06	2.68	0.12	0.34	0.21
ANAPC2	15.82	25.11	15.51	18.94	30.52	10.73	27.98	20.1	14.35	17.48	15.31	26.92	14.76	25.72	17.58	17.97	31.1	26.99	39.81	32.14	35.1	35.99	26.74	19.26	19.17	50.23	43.46	19.43	14.72	28.8	21.78	23.32	29.84	37.15	15.7	26.74	27.88	26.12	36.23	19.19	83.79	30.21	45.71	26.28	41.04	36.77	27.72	30.34	27.85
ANAPC4	25.38	4.81	23.68	21.36	15.18	24.87	35.78	25.28	18.58	20.61	21.1	32.09	22.82	23.76	23.16	21.59	15.34	13.62	10.72	8.76	10.97	10.8	13.52	11.22	9.65	12.16	12.81	10.14	6.96	11.18	6.79	6.84	11.83	14.01	16.07	16.13	9.58	8.51	14.25	10.61	18.77	8.65	12.97	24.63	8.2	25.33	12.49	23.94	15.96
ANAPC5	71.61	62.2	99	129.05	109.07	90.66	96.04	103.91	113.97	83.62	87.36	99.97	88.68	60.86	104.3	115.77	98.02	77.11	61.37	60.67	78.27	71.89	200.36	59.33	78.42	63.15	90.32	28.07	32.93	73.66	53.49	40.45	63.62	83.12	81.96	87.03	83.29	60.43	86.61	96.36	161.24	96.39	124.96	141.04	101.19	156.81	95.18	85.04	128.19
ANAPC7	40.93	31.53	63.49	51.41	33.56	41.87	36.48	59.15	84.96	32.73	37.44	65.2	44.07	35.34	51.76	56.47	30.05	49.26	31.2	23.76	30.61	21.02	29.18	26.44	32.47	41.76	34.8	16.98	9.63	37.06	16.41	18.03	26.44	45.57	40.31	48.71	37.75	27.07	34	52.68	65.71	37.46	47.67	51.45	25.5	61.77	30.05	39.01	35.37
ANG	20.69	38	37.57	47.44	84.87	25.44	14.52	232.32	78.33	29.73	59.66	71.74	41.9	65.69	50.83	19.86	129.34	22.17	156.56	92.39	50.66	5.99	65.98	100.32	11.28	25.41	24.46	136.43	81.8	95.49	168.08	120.25	82.53	36.07	45.21	50.3	59.49	33.93	50.6	22.99	37.28	85.19	11.61	30.07	139.02	30.58	91.43	34.22	27.12
ANGEL1	30.65	12.93	13.96	26.4	24.82	21.69	32.47	32.4	21.9	18.28	14.06	23.47	21.86	26.89	26.57	15.68	15.06	12.63	27.94	19.03	18.65	21.25	28.34	9.27	15.2	32.57	15.91	12.68	8.05	18.41	13.37	11.01	10.68	21.09	7.96	13.82	16	18.29	21.54	20.65	36.07	23.61	43.75	28.09	35.6	76.09	29.43	24.94	22.54
ANGEL2	16.87	7.21	11.07	13.57	9.81	12.91	18.02	11.64	23.18	14.9	11.68	12.39	22.24	12.11	18.48	11.55	6.02	8.5	4.91	7.08	6.9	9.07	7.34	5.98	4.73	8.52	5.36	6.02	3.98	7.09	5.69	4.05	5.49	8.4	9.84	16.21	7.16	6.29	10.4	7.85	15.2	12.21	11.16	14.92	8.23	27.4	14.72	17.7	10.5
ANGPT1	0.97	0.84	1.68	1.59	2.83	2.59	3.28	1.88	2.22	5.35	0.75	4.44	1.26	3.2	5.29	3.15	0.75	2.89	1.87	2.07	1.32	0.54	1.46	1.03	0.22	5.95	0.55	1.14	1.85	0.74	2.7	0.96	0.82	1.95	0.4	0.9	2.12	2.98	2.75	1.53	4.19	1.76	0.41	1.79	1.81	2.31	1.16	6.24	0.58
ANGPT2	9.36	2.65	5.91	5.85	11.53	7.46	13.91	6.2	9.17	11.62	7.02	9.18	11.05	23.84	3.81	8.61	2.08	3.28	14.65	10.59	4.23	2.43	5.16	4.9	3.7	9.8	1.19	1.49	0.56	2.99	1.08	4.85	3.35	3.38	2.07	3.85	4.33	3.36	11.81	3.29	2.19	2.97	8.39	3.19	10.4	7.61	5.62	13.25	5.78
ANGPT4	0	0.16	0.06	0	0.17	0.03	0.86	0.06	0	0.06	0.08	0	0	0.03	0.03	0.07	0	0.09	0.03	0.29	0.03	0.11	0	0	0	0	0	0	0	0.03	0	0	0.04	0.03	0.18	0.06	0.19	0.07	0.06	0.23	0.03	0.03	0.03	0	0.14	0.06	0.14	0.09	0.08
ANGPTL1	0.06	1.33	2.01	0.43	0.94	0.57	1.06	1.1	0.42	11.18	0.42	0.22	0.11	4.39	8.68	2.77	0.65	1.97	0.27	2.91	0.55	1.49	1.39	1.49	0.3	0.36	0.18	1.13	2.27	0.81	0.82	0.82	0.33	0.75	0.39	2.8	1.8	4.69	2.11	1.02	1.36	0.97	0.35	0.49	2.01	1.16	1.45	3.2	0.27
ANGPTL2	8.75	55.25	53.39	18.81	83.7	27.96	24.7	43.46	20.01	185	50.06	15.11	23.96	114.87	42.39	43.88	21.38	20.08	24.58	91.62	35.31	38.32	30.06	26.52	51.7	19.2	8.49	12.48	25.62	11.89	15.47	36.86	18.62	48.76	22.12	39.05	54.24	106.57	154.06	86.85	21.49	27.32	19.64	37.41	102	32.09	61.36	135.92	13.64
ANGPTL3	0.05	0.13	0.22	0.12	0.05	0.16	0.1	0.08	0.7	0.04	0.06	0.09	0.08	0.08	1.26	0.19	1.24	0.16	3.38	0.03	0	0	0.09	0.03	0	0.03	0	2.66	0.06	0.22	0.92	0.04	0.05	0.02	0.02	14.33	0.55	0	0.04	0.02	0.06	0.06	0.07	0.17	0.06	0.08	2	0.06	0.09
ANGPTL4	4.46	64.81	6.28	37.46	50.04	7.12	3.02	7.51	3.51	15.21	5.72	5.72	2.5	24.95	2.14	9.13	15.14	72.09	10.47	10.49	12.57	10.16	7.91	13.87	66.81	3.64	10.03	5.25	27.55	5.65	4.03	53.99	2.88	8.1	15.11	14.72	32.07	15.54	15.7	9.18	3.31	10.78	11.09	7.89	114.72	5.14	5.24	6.71	1.32
ANGPTL5	0	0	0.05	0.02	0	0	0.06	0	0.05	0.05	0	0.03	0.05	0.11	0.05	0.21	0	0.05	0.05	0	0	0	0.07	0	0	0.03	0.03	0	0.07	0	0	0	0	0	0.06	0.05	0	0.15	0	0	0.1	0.02	0.03	0.04	0.15	0.03	0	0.07	0.02
ANGPTL6	1.14	0.85	0.63	0.21	2.13	0.17	0.64	0.5	0.25	0.51	0.55	0.23	0.23	0.87	1.53	1.51	3.74	0.71	0.7	0.49	0.48	1.71	15.83	0.59	0.25	0.28	0.52	3.56	5	2.12	5.03	4.9	0.98	0.93	0	5.47	1.52	2.87	0.59	0.12	1.71	0.62	0.65	1.18	0.66	1.25	1.11	0.61	0.95
ANGPTL7	0	0.17	0.18	0.19	0.05	0.03	0.03	0.35	0.03	0.45	0.06	0.03	0.1	1.58	0.65	0.19	0.12	0.18	0.03	0.42	0.04	0	0.11	0	0	0.11	0.08	0.21	0.51	0.08	0.06	0	0.06	0.03	0.06	0.42	0.11	1.12	0.19	0.05	0.18	0.05	0.12	0.22	0.38	0.24	0.19	0.64	0.17
ANHX	0	0	0	0	0	0	0	0	0	0	0	0	0	0	0	0	0	0	0	0	0	0	0	0	0	0	0	0	0	0	0	0	0	0	0	0	0	0	0	0	0	0	0	0	0	0	0	0	0.03
ANK1	0.38	0.72	0.32	0.93	6.94	4.48	0.28	0.85	4.02	3.13	0.26	0.22	10.16	0.32	1.16	2.13	1.82	0.96	1.15	5.58	1.21	16.66	1.14	7.28	7.83	0.21	0.98	2.51	0.36	0.82	4.58	3.3	0.71	1.09	9.86	0.43	3.62	2.36	26.83	1.06	0.37	0.52	0.59	0.79	52.91	1.21	1.4	0.86	0.96
ANK2	0.25	0.69	2.15	0.41	1.16	0.74	0.48	2.64	0.94	19.05	0.87	0.5	0.94	3.04	9.99	3.53	1.18	2.85	0.3	1.98	0.81	1.37	2.53	1.64	0.24	1.4	0.61	2.76	1.84	1.37	2.16	0.49	0.59	1.7	1.71	1.91	3.57	10.79	5.76	0.87	0.95	1.49	0.16	1.37	2.9	3.74	2.34	4.99	0.54
ANK3	6.78	3.84	8.94	3.18	11.26	3.85	9.61	11.76	10.12	8.49	3.54	5.65	10.75	7.93	16.09	17.49	3.84	15.03	3.29	3.3	4.8	6.27	7.19	1.59	2.15	6.18	7.01	3.79	15.75	6.74	4.17	7.48	6.6	5.81	11.06	6.92	13.52	3.94	7.46	5.86	9.17	3.12	4.42	7.65	3.57	15.65	4.94	5.12	6.6
ANKAR	0.65	0.63	1	0.8	0.67	1.05	2.54	0.43	1.18	1.03	0.9	1.11	1.92	0.78	1.42	1.49	0.54	0.64	0.46	0.39	0.21	0.63	0.86	0.42	0.27	0.31	0.44	0.74	0.37	0.37	0.7	0.42	0.37	0.44	1.36	0.92	0.49	0.24	0.88	0.69	0.41	0.45	1.23	0.79	0.23	1.3	0.76	0.58	0.17
ANKDD1A	0.59	0.91	2.24	1.27	0.86	1.35	0.9	1.79	1.89	3.49	0.53	1.09	1.41	2.02	3.21	2.46	0.74	1.88	1.08	1.72	0.78	1.06	1.32	1	0.61	1.09	0.33	1.75	0.69	1.23	0.87	0.67	0.59	0.79	1.35	0.89	1.27	2.75	2.73	1.13	0.66	1.08	1.08	0.74	1.64	1.8	1.24	2.41	0.81
ANKDD1B	0.12	0.12	0.53	0.85	0.17	0.17	0.18	1.31	0.61	0.69	0.47	0.34	0.65	0.14	0.74	0.44	1.06	0.21	0.36	0.62	1.18	0.13	0.17	0.35	0.25	0	0.24	0.56	0.33	2.37	0.73	0.12	0.46	1.4	0.24	0.3	1.27	0.25	0.29	0.6	0.66	1.1	0.05	0.13	0.14	0.15	0.06	0.73	0.08
ANKEF1	31.09	4.52	11.66	7.73	12.06	15.23	2.66	16.94	6.73	5.75	13.09	21.18	21.19	6.9	27.65	8.39	8.78	5.86	6.74	6.68	6.66	11.52	10.51	8.42	3.55	6.17	13.06	2.95	4.59	7.38	5.45	4.94	6.57	8.07	2.71	21.84	13.59	2.9	7.72	10.8	11.04	16.18	18.26	10.22	9	24.72	18.4	13.72	13.34
ANKFN1	0.29	0.13	0.9	0	0.04	0.05	0.09	0.3	1.63	0.62	0	0.08	0.07	0.4	0.32	0.96	0.97	0.07	0.1	1.51	0	3.32	0.74	0.11	0	0	0.02	0.69	0	0.34	0.31	1.79	0.49	0.14	0.03	0.02	0.17	0	0.28	0.05	0.07	0.05	0.03	0.21	0	0.08	0.07	0.07	0.56
ANKFY1	23.57	14.01	27.71	30.68	29.59	29.06	20.53	29.21	47.34	42.9	30.02	33.92	19.3	28.77	34.65	26.21	23.34	23.9	25.15	12.57	19.95	28.73	15.88	21.46	20.62	15.11	26.53	15.51	12.07	22.15	14.33	14.23	21.64	19.68	17.66	19.3	14.7	20.84	32.18	16.05	18.03	15.03	16.77	47.44	14.59	55.89	28.38	39.12	39.57
ANKH	60.75	9.32	58.6	13.83	22.11	5.59	37.36	39.71	19.63	32.91	21.95	35.22	7.53	23.15	34.74	12.89	10.56	8.57	72.84	19.78	20.35	14.47	55.18	7.58	11.89	23.67	8.97	8.88	15.86	7.52	7.4	11.78	4.06	26.61	12.62	32.87	24.22	26.41	27.71	12.34	20.61	16.03	26.79	25.97	63.11	22.65	11.01	34.05	2.68
ANKHD1	28.76	21.81	46.54	35.65	28.27	30.75	18.27	42.4	29.89	28.32	33.61	26.03	51.57	45.06	55.01	44.17	27.3	26.61	11.16	17.72	17.89	17.72	19.16	14.86	20.8	17.08	21.78	24.52	15.3	19.77	16.5	14.01	12.64	25.26	38	21.4	20.32	15.72	25.59	16.02	24.99	15.19	56.96	24.91	20.61	29.29	34.23	42.44	32.93
ANKHD1-EIF4EBP3	14.75	13.07	7.34	21.96	16.3	12.99	14.15	12.51	27.94	25.2	17.94	8.09	14.55	25.61	16.59	14.7	25.65	22.84	9.19	20.44	14.13	24.31	17.28	16.54	10.8	10.17	21.27	21.15	13.9	20.9	19.21	22.38	14.23	15.07	13.01	19.33	16.51	18.11	20.78	21.87	19.71	24.63	28.33	15.77	24.71	10.11	30.23	26.63	29.87
ANKIB1	63.37	12.8	304.01	40.04	23.14	33.87	23.29	26.1	34.58	34.97	27.89	28.58	43.43	188.93	38.11	36	12.94	20.33	12.96	11.95	10.44	16.2	12.1	15.39	25.26	32	19.38	9.58	7.75	14.64	9.59	9.14	15.06	13.8	27.93	28.57	38.12	10.11	23.76	25.27	42.4	13.51	19.29	43.13	16.47	32.66	18.78	34.37	29.33
ANKK1	0.06	0.03	0.12	0	0.08	0.02	0	0.31	0.07	0.12	0.02	0.03	0.07	0.36	0.2	0.72	0.18	0.41	0.05	0.22	0	0.11	0.07	0.21	0.08	0.13	0.05	0.19	0.07	0.12	0.12	0.04	0	0.09	0.88	0.14	0.02	0.14	0	0.53	0.47	0.11	0.05	0.2	0.21	0.42	0.42	0.38	0.04
ANKLE1	0.2	0.21	0.7	2.12	0.72	0.84	0.84	1.1	0.52	0.64	0.15	1.51	0.46	0.5	0.39	0.78	0.21	0.47	1.2	0.8	0.18	0.4	0.6	0.13	0.04	1	0.18	0.3	0.17	0.53	0.35	0.5	0.39	0.64	1.04	1.31	0.24	0.93	0.23	0.28	1.14	0.2	0.18	0.64	0.19	1.16	0.38	5.05	0.52
ANKLE2	18.61	19.7	49.69	67.22	39.04	43.56	16.84	26.47	34.25	37.01	44.26	43.34	33.3	33.07	35.58	38.43	22.39	34.05	25.17	33.32	30	47.5	71.26	25.61	37.37	26.91	28.36	18.09	13.23	34.33	15.16	18.09	28.15	25.44	30.23	38.33	32.03	25.82	41.81	105.01	46.97	36.25	41.77	43.24	32.55	47.08	30.22	41.75	39.9
ANKMY1	3.23	1.94	5.07	10.52	7.31	6.01	7.2	8.48	8.01	4.38	2.88	5.59	6.16	5.67	3.76	7.73	4.62	3.6	6.01	2.03	3.5	5.68	2.91	1.46	4.27	6.25	8.6	2.37	2.14	4.45	3.01	2.07	3.66	5.3	8.51	2.12	2.83	3.12	4.21	5.62	6.74	3.72	2.99	3.39	2.07	4.75	3.07	4.43	2.13
ANKMY2	22.31	18.5	22.42	30.3	25.55	34.08	15.93	26.17	31.05	21.55	26.85	32.13	39.7	21.66	68	26.18	23.75	14.37	30.55	8.16	21.62	14.97	16.05	17.81	7.08	27.43	20.93	16.93	10	13.22	21.76	8.82	19.12	16.17	12.92	50.96	27.46	10.36	17.9	20.69	18.35	18.47	26.77	25.04	9.74	20.35	36.14	18.48	23.03
ANKRA2	15.92	12.22	11.77	4.32	18.09	13.33	23.72	17.29	18.42	18.12	13.8	13.26	20.51	14.69	15.4	12.49	7.59	9.37	11.42	12.31	15	9.45	13.24	13.86	8.63	13.35	11	6.13	10.32	23.87	8.51	8.88	8.47	15.52	20.71	10.46	11.49	8.6	14.65	13.05	8.95	12.19	6.83	11.45	6.63	12.23	8.92	12.16	6.78
ANKRD1	0.03	0.2	8.72	0.05	0.03	1.11	0.19	0.12	0.27	0.06	0.05	0.24	0	0.03	0	0.35	0.05	0	0.25	0.08	0.05	0.38	0.09	0.78	0.49	0	0	0	0	0	0	0.27	1.47	0.2	0.38	0.03	0.18	0	0.09	27.32	0.94	0	0.2	0.04	0	0.03	0.71	5.95	3.19
ANKRD10	92.19	63.04	94.83	63.9	47.37	84.77	123.88	47.44	88.67	102.22	45.46	72.28	100.41	105.68	107.67	96.85	31.77	20.38	25.03	56.69	55.64	68.77	38.06	27.87	66.74	42.54	32.17	25.04	22.43	36.32	23.68	32.36	48.14	37.19	97.85	30.79	36.47	36.36	80.1	39.42	77.81	30.95	80.81	64.92	47.99	37.79	33.75	44.89	31.39
ANKRD11	19.26	21.23	32.75	34.81	42.73	33.02	15.99	21.33	28.91	39.53	21.17	29.96	29.56	30.46	28.43	27.04	32.23	39.24	32.96	40.13	32.59	31.78	47.59	24.63	32.45	27.65	35.83	28.38	22.71	27.26	20.91	21.92	24.45	31.55	44.37	44.57	41.6	31.96	43.01	39.47	42.55	22.73	44.2	40.27	30.71	52.71	48.3	53.27	64.61
ANKRD12	11.89	6.36	17.78	8.95	10.53	13.96	13.11	15.35	14.52	18.52	15.58	14.85	16.55	23.99	30.57	16.14	11.29	13.68	10.73	10.67	6.82	8.99	9.44	7.62	7.51	8.33	4.69	13.09	8.38	8.27	11.89	7.16	6.2	4.74	6	8.84	11.44	8.47	11.45	6.8	18.48	13.01	11.91	9.39	6.79	9.9	13.99	15.21	7.77
ANKRD13A	25.54	18.89	39.77	19.33	29.42	23.96	17.78	30.51	40.95	42.86	31.07	24.28	24.81	21.01	54.3	36.38	30.82	43.3	32.6	19.74	23.39	25.03	25.4	23.07	9.92	12.53	20.35	27.69	13.7	37.93	22.09	18.88	19.89	30.31	22.38	35.7	28.4	28.18	31.59	23.95	56.12	37.9	20.05	41.87	24.15	36.13	42.74	37.33	24.55
ANKRD13B	5.36	12.85	8.12	12.36	3.07	9.99	13.63	4.24	4.15	5.59	3.53	10.69	7.5	3.93	3.98	4.46	3.81	2.91	7.22	7.13	2.41	9.76	1.71	9.06	17.35	15.07	13.93	1.77	1.19	4.96	1.49	2	5.89	9.23	9.1	10	6.83	6.34	7.85	9.43	21.35	3.59	22.35	9.14	9.62	9.92	8.36	14.62	30.35
ANKRD13C	8.4	9.06	12.62	11.67	9.78	10.65	9.89	13.22	12.81	12.52	11.24	11.35	12.28	14.17	11.62	10.82	8.63	9.4	5.29	6.29	7.84	7.19	6.28	8.04	5.38	13.37	10.77	5.09	6.41	7.9	6.03	5.62	7	8.28	9.92	11.06	12.13	5.76	10.17	7.59	8.06	6.73	6.16	12.77	6.94	18.08	8.31	13.86	7.11
ANKRD13D	12.97	26.81	21.5	18.53	30.08	13.76	16.49	16.07	20.07	25.76	9.38	12.86	15.18	16.98	21.45	19.03	18.16	33.79	28	16.27	10.71	25.46	21.54	18.34	65.66	34.22	15.38	15.9	6.77	19.15	12.65	16.02	14.75	17.43	47.97	26.01	14.7	22.83	26.98	34.34	24.35	14.31	20.85	14.34	26.93	24.19	23.9	22.22	15.49
ANKRD16	8.5	9.21	5.2	14.29	6.69	5.06	12.27	7.55	7.12	8.43	3.36	6.67	5.82	3.43	8.33	7.58	5.4	7.06	12.37	6.42	9.03	10.62	9.45	3.29	7.09	18.14	7.89	6.72	3.51	4.9	8.54	4.4	4.26	13.75	19.16	11.92	9.43	10.79	16.26	9.06	14.96	11.88	10.99	6.61	7.39	8.03	3.5	8.88	8.03
ANKRD17	38.44	18.69	38.71	32.58	43.38	52.85	54.76	41.86	53.66	48.19	48.84	43.16	52.33	37.18	41.47	52.25	29.42	35.72	20.59	23.44	28.21	22.15	28.95	23.4	15.5	37.35	31.64	20.91	20.59	25.81	17.12	18.01	24.43	31.81	26.89	32.3	23.47	22.12	34.59	25.77	36.24	15.17	23.4	39.62	29.11	83.59	36.88	46.14	39.07
ANKRD18A	0.73	0.04	1.08	0.82	2.35	4.08	4.04	6.24	2.87	1.23	1.56	9.75	3.26	1.49	0.46	1.73	0.57	0.74	0.11	0.97	0.77	4.71	0.4	0.88	0.38	1.46	0.78	0.56	0.48	0.12	0.58	0.28	0.02	0.11	2.25	0.02	0.48	0.58	0.94	1.11	1.53	1.27	2.05	2.65	0.23	14.38	0.05	1.27	0.04
ANKRD18B	0	0	0.67	0.73	0.13	0.16	0.14	6.52	0.59	0	0	0.65	0.06	1.23	0.08	1.52	0	1.84	0	0.37	0	0.02	0	0.41	0.07	1.32	0	0	0	0	0	0	0	0	1.69	0.76	0	0.02	0	0	3.97	0.07	0.07	0.05	1.64	2.95	2.31	2.29	0.03
ANKRD18DP	0	0.03	0	0.02	0.02	0.18	0.13	0.06	0.59	0.04	0	0.23	0.04	0.09	0.04	0.17	0	0	0	0	0	0	0.2	0	0.02	0	0	0.08	0	0	0	0.07	0.08	0	0	0.02	0	0.02	0.06	0.02	0.04	0.04	0	0.03	0	0	0	0.1	0.11
ANKRD19P	0.24	0.34	0.49	0.15	0.16	0.37	0.46	0.95	1.62	0.98	0.29	0.53	0.54	0.4	0.29	0.79	0.59	0.3	0.42	1.08	0.22	1.75	0.59	0.31	0.44	0.36	0.32	0.83	0.15	0.31	0.49	0.65	0.42	0.4	0.83	0.36	0.45	0.87	1.05	0.56	0.6	0.54	1.39	0.69	1.03	0.27	1.97	1.85	0.71
ANKRD2	0	0.21	0	0.04	0.18	0.05	0.1	0.08	0	0.29	0	0	0.04	0.1	0.27	0.05	0.07	0.4	0.09	0.49	0.04	0.15	0.52	0.07	0.47	4.27	0.09	0	0	0.04	0.16	0	0.16	0.12	0.18	0.41	0.35	0.8	0.18	0.27	0.04	0.21	0	0.11	0.06	0.05	0.11	0.12	0.07
ANKRD20A1	0.43	0.1	0.09	0.03	0.72	0.29	1.86	0.17	0.74	0.1	0	0.13	0.58	0.88	0.08	0.38	0	0.38	0.09	0.18	0.02	0.33	0.54	0.22	0.1	0.59	0.11	0	0.02	0.05	0.05	0.13	0.05	0.14	0	0	0.16	0	0.26	0.35	0	0.17	0	0.07	0.38	0.12	0.48	0.3	0.14
ANKRD20A11P	0	0	0	0.15	0	0.31	0.09	0	0.06	0.06	0	0.13	0	0.16	0.06	0.13	0	0.97	0	0.16	0.24	0.4	0	0	0.05	0.08	0.18	0.23	0	0.12	0.15	0.1	0	0.11	0.07	0	0.05	0.13	0.06	0	0	0.11	0	0	0.09	0.42	0.11	0.45	0.06
ANKRD20A12P	0.33	0.54	1.33	0.89	0.25	0.5	34.69	0.4	12.65	1.37	0.93	2.1	0.58	8.19	2.92	1.03	0.32	0.85	0.14	1.73	0.15	0	1.3	2.68	0.31	6.27	0.57	0.14	0.1	0.1	0.04	0.06	0	0.3	1.99	0.14	0.39	0.16	0.96	0.17	1.4	0.34	0.55	1.27	0.41	1.31	3.66	5.47	23.18
ANKRD20A19P	0.01	0.05	0.1	0.04	0.02	0.09	0.12	0.01	1.52	0	0.01	0.1	0.02	0.01	1.45	0.09	0.05	0	0.05	0.09	0	4.76	0.08	0.02	0.03	0.09	0.06	0.14	0	0.01	0.07	0.06	0.03	0.04	0.09	0	0	0.01	0.06	0.02	0.02	0.01	0.01	0.05	0.02	0.03	0.24	0.09	0.12
ANKRD20A2	0	0.1	0.07	0	0.1	0.01	0.71	0.12	0.17	0	0	0	0	0	0	0.51	0.17	0.3	0.07	0.03	0	0	0.18	0	0	0	0.09	0	0.02	0	0.05	0.16	0	0.04	0.89	0.28	0.24	0.04	0	0	0	0	0.1	0	0	0	0	0.19	0
ANKRD20A3	0.27	0	0.27	0.08	0.14	0.24	0.29	0.19	0.39	0.3	0.08	0.29	0.13	0.56	0.14	0.28	0	0.65	0.05	0	0.05	0.04	0.08	0	0.03	0.8	0.03	0	0	0.01	0	0	0	0.1	0.26	0	0	0	0.15	0	0.04	0.13	0	0.17	0	0.06	0.09	0.83	0.33
ANKRD20A4	0.17	0	0.67	0.08	0.61	0.15	0.33	0.17	0.61	0.39	0.21	1.4	0.53	0.75	0.2	0.94	0.39	0.94	0	0.14	0.26	0	0.12	0.16	0.05	0.76	0.04	0.2	0	0.27	0.04	0.07	0.1	0	0.38	0	0.17	0.21	0.21	0	0.13	0.13	0.34	0.31	0	0.68	0.14	0.96	0.39
ANKRD20A5P	0.34	0.31	1.91	1.42	0.19	0.47	0.4	0.77	1.1	0.2	0.74	1.15	0.7	0.52	0.54	0.99	0.19	4.11	0.03	0.91	0.63	0.11	0.28	0.17	0.09	0.3	0.23	0.25	0.1	0.28	0.76	0.25	0	0.25	0.43	0.06	0.27	0.44	0.34	0.06	0.59	0.14	0.61	0.27	0.09	0.41	0.17	0.81	0.15
ANKRD20A8P	0.04	0	0.05	0.12	0.08	0.09	0.94	0.31	0.34	0.06	0.05	0.36	0.16	0.39	0.08	0.93	0.29	0.43	0	0.03	0	0.08	0.08	0	0.02	0.42	0.07	0.06	0	0.04	0.02	0	0.05	0.02	0.34	0.07	0.13	0	0.22	0.04	0.02	0.04	0.1	0.1	0.03	0.14	0.1	1.15	0.09
ANKRD20A9P	0.72	0.59	3.32	1.45	1.13	3.1	2.56	1.41	1.88	1.38	0.78	4.89	1.83	1.54	1.35	3.4	0.73	1.11	0.94	0.89	0.63	0.92	0.83	0.58	1.7	1.55	0.65	0.81	0.79	0.88	0.72	0.43	0.52	0.72	1.91	0.97	0.82	0.57	0.96	1.61	1.86	0.75	1.7	1.48	0.86	2.19	1.37	3.44	2.45
ANKRD22	11.29	21.2	24.53	1.89	13.52	7.01	7.6	11.52	11.94	34.37	9.96	13.34	64.15	3.16	30.67	47.01	28.71	33.91	6.54	18.9	18.56	39.01	26.52	6.2	13.97	0.92	68.07	28.86	5.92	5.19	29.19	18.8	25.37	14.42	56.36	18.71	16.35	10.48	31.96	20.78	31.98	8.82	35.56	19.88	3.88	3.72	19.95	3.98	18.21
ANKRD23	1.15	1.08	1.7	1.25	2.75	1.35	2.63	2.73	2.21	1.23	0.63	1.82	1.56	1.07	1.41	0.77	1.28	0.7	2.96	1.11	0.91	2	1.51	0.28	1.42	4.65	1.03	0.64	0.51	0.77	0.52	0.73	1.05	0.73	1.07	0.74	0.97	0.53	1.24	1.48	2.74	0.81	3.18	2.38	1.61	2.47	1.18	1.79	1.05
ANKRD24	0.11	0.3	0.33	0.3	0.3	0.03	1.14	0.29	0.32	0.34	0.06	0.11	0.16	0.38	0.4	0.41	0.59	0.49	0.49	0.66	0.18	1.47	0.91	0.39	0.23	0.34	0.37	1.45	0.28	0.27	0.77	0.33	0.38	0.48	0.58	0.26	0.85	0.37	0.72	0.42	1.84	0.84	0.55	0.41	0.21	0.71	1.56	0.26	1.18
ANKRD26	3.29	1.91	5.08	6.61	3.59	2.09	6.83	5.54	5.35	5.82	2.58	6.25	7.23	2.32	8.06	6.61	2.68	2.79	2.14	2.9	2.31	1.38	2.84	1.2	2.12	5.77	1	1.99	1.36	1.21	2.14	1.42	2.1	1.82	3.91	2.75	2.24	2.05	3.67	2.66	4.62	2.28	2.89	3.54	2.05	8	5.5	6.58	4.56
ANKRD26P1	0	0	0.05	0.03	0	0.05	0.04	0.01	0.01	0	0	0.03	0.01	0.02	0	0.04	0	0	0	0	0	0	0	0	0.02	0.36	0	0	0	0	0	0	0.01	0	0	0.31	0	0	0	0	0.01	0	0	0	0.01	0	0.01	1.47	0.03
ANKRD26P3	0	0	0	0	0	0	0	0.03	0.15	0.02	0	0	0	0	0.03	0.1	0	0	0	0	0	0	0	0	0.04	0	0	0.06	0	0.03	0	0	0	0.02	0	0	0	0	0.08	0	0.02	0.02	0.02	0	0.02	0	0	0.13	0
ANKRD27	33.55	17.94	41.48	20.58	17.57	27.2	29.17	43.47	30.21	21.29	21.71	20.49	24.17	25.25	21.76	21.85	13.85	21.32	26.59	12.42	14.15	19.82	28	16.99	22.04	59.16	15.85	10.99	9.24	27.31	10.93	8.94	15.97	21.76	15.55	45.22	23.17	12.46	22.11	27.1	15.39	7.87	9.2	27.52	14.64	84.7	26.41	25.28	32.48
ANKRD28	20.3	7.01	17.28	15.63	17.09	25.92	20.93	20.2	18.15	34.76	29.08	17.54	31.07	22.12	25.26	30.38	15.38	15.75	7.49	13.78	12.88	16.11	13.81	15.62	18.5	8.57	16.62	9.62	6.79	13.95	12.88	8.81	11.38	11.71	20.77	15.62	11.14	7.74	22.59	17.83	19.38	15.34	14.42	34.26	10.91	22.85	14.63	26.97	23.79
ANKRD29	1.52	7.18	2.41	8.85	2.25	0.35	1.32	4.02	2.11	4.46	1.3	0	0.7	1.11	9.44	5.8	5.64	9.5	0.51	6.76	1.17	2.99	12.52	1.85	0.42	3.08	0.21	5.97	0.51	1.24	6.87	2.41	9.01	5.3	0.53	4.45	4.13	4.92	2.6	1.31	0.42	3.15	2.34	5.68	0.8	1.12	7.71	3	1.12
ANKRD30A	0	0	0.06	0	0	0.11	0.03	0	0	0	0	0.07	0	0	0	0.01	0	0	0	0	0	0	0	0	0	0.05	0	0	0	0	0	0	0	0	0	0	0	0	0.03	0	0.03	0	0	0	0	8.96	0	0.11	0.06
ANKRD30B	0	0	0.02	0	0	0.03	0	0.01	0.11	0	0.17	0.01	0.01	0	0.01	0.01	0	0	0	0	1.58	0	0	0	0	0.02	0	0	0.07	0	0	0	0	0	0	0	0.02	0.31	0	0.01	0	0	0.01	0.05	0.02	0.01	0	0.01	0.02
ANKRD30BL	0	0	0.27	0	0	0.38	0.07	0.04	0.3	0	0	0.39	0.11	0.04	0.03	0.15	0.19	0	0	0	0	0	0	0	0.12	0.11	0	0.24	0	0	0.07	0	0.11	0.08	0	0	0	0.05	0	0	0	0	0.05	0.06	0	0	0.04	0.22	0.41
ANKRD30BP2	0.17	0.52	1.93	0.86	0.27	1.89	1.53	0.18	0.33	3.19	0.07	3.85	0.48	2.42	0.09	1.96	0.31	0.09	0.33	0.95	0.17	0.18	0.79	0.08	2.13	0.46	0.21	0.38	0	0.22	0.23	0.28	0.08	0.12	0.43	0.05	0.04	0.06	1.11	0.97	0.21	0.03	2.07	0.29	0.06	3.82	0.36	0.84	0.93
ANKRD30BP3	0	0	0	0	0.04	0.05	0	0	0	0	0	0	0	0.04	0	0	0	0.05	0	0	0	0	0	0	0	0	0	0	0	0	0	0	0	0	0	0	0	0	0	0	0	0	0	0	0	0	0	0.05	0.04
ANKRD31	0.11	0.03	0.11	0.05	0.12	0.27	0.36	0.02	0.04	0.02	0.05	0.01	0.36	0.07	0.19	0.16	0.35	1.52	0.01	0.12	0.1	0.05	0.14	0.09	0.08	0.12	0.01	0.12	0.03	0.12	0.06	0.05	0.24	0.09	0.07	0.06	0.07	0.02	0.02	0.25	0.06	0.01	0.25	0.18	0.01	0.56	0.05	0.29	0.19
ANKRD32	5.21	3.36	5.24	7.34	2.63	5.21	1.64	6.14	6.07	3.89	7.83	6.35	6.28	4.58	4.8	6.52	2.56	2.61	1.15	1.66	2.94	4.29	4.84	2.38	2.73	5.01	2.62	1.48	2.11	1.3	1.53	1.56	4.99	2.99	4.7	2.11	3.13	2.04	3.41	4.4	3.55	2.32	3.12	2.89	2.99	4.06	4.62	7.58	6.35
ANKRD33	0.16	0	0.87	0.09	0.14	0.59	0	0.12	0.07	0	0.29	0.38	0.04	0	0.03	0.12	0	0	0.27	0.12	0.09	0	0	0.06	0.17	0	0	0	0	0.15	0.05	0.41	0	0.12	0	0	0.09	0	0	0.41	6.73	0.03	0.72	0.31	1.42	0.25	0	0.07	0
ANKRD33B	0.32	0.43	0.42	0.33	0.59	1.05	0.57	0.94	1.12	1.68	0.41	0.53	0.52	0.67	1.34	1.67	1.02	4.06	0.33	0.91	0.68	1.65	2.06	0.48	0.5	0.36	0.18	1.84	1.14	1.03	1.56	0.48	0.4	0.97	0.34	0.4	1.36	4.4	1.17	1.35	0.29	0.9	0.25	0.47	0.83	0.68	1.38	1.8	0.3
ANKRD34A	0.21	0.63	0.32	0.35	0.56	0.42	1.42	0.7	1.92	0.72	0.19	2.48	0.37	1	0.83	0.44	0.81	0.66	0.84	1.55	0.88	0.87	2.4	0.63	0.32	4.36	0.18	1.36	0.32	0.86	0.62	0.57	0.86	1.27	0.48	0.81	1.14	2.07	2.06	0.43	0.65	0.52	0.34	0.5	0.64	1.6	1.61	1.01	1.07
ANKRD34B	0.03	0.02	0.06	0	1.88	0.1	0.06	0.06	1.35	0.06	0.01	0.2	0	0.11	0	1.89	0	0	0.02	0	0.01	1.27	0	0.04	0.01	0.02	0	0.12	0	0.03	0	0.03	0	0	0.08	0	0	0	0.03	0	0	0.01	0.07	0.17	0.17	0.46	0.03	0.24	0.09
ANKRD34C	0.03	0	0.03	0	0	0	0	0.03	0	0.01	0	0.01	0.02	0.01	0.04	0	0	0	0	0	0.01	0	0	0	0.15	0.03	0.01	0	0	0	0	0	0	0	0	0	0	0.06	0.02	0.01	0	0	0.07	0.01	0.05	0.01	0.07	0.01	0.01
ANKRD34C-AS1	0	0	0	0	0	0	0	0	0	0	0	0	0	0	0	0	0	0	0	0	0	0	0	0	0	0	0	0	0	0	0	0	0	0	0	0	0	0	0	0	0	0	0	0	0	0	0	0	0
ANKRD35	0.27	0.99	0.88	0.16	0.76	0.33	0.24	0.67	0.61	2.61	0.21	0.25	0.16	2	1.56	2.14	0.75	20.81	0.58	3.83	1.12	0.98	2.01	1.2	0.46	8.41	0.35	0.69	1.86	1.05	1.02	0.81	1.93	1.98	0.86	2.59	1.74	4.64	2.98	1.44	0.9	1.49	0.21	0.96	1.5	3	1.85	1.67	1.16
ANKRD36	1.21	3.28	2.99	3.35	3.62	4.02	1.97	8.31	3.9	2.89	2.7	3.72	4.2	2.55	3.81	6.53	8.17	1.86	2.52	3.8	1.36	3.54	3.96	1.84	1.8	2.1	1.82	6.2	1.81	1.06	8.29	2.17	0.91	1.06	1.49	1.72	2.15	1.58	2.23	1.63	2.65	2.51	4.54	2.29	2.88	5.44	6.41	3.46	3.3
ANKRD36B	1.53	2.11	4.98	4.31	3.17	3.79	1.99	7.72	4.56	3.28	2.98	6.36	6.33	3.08	4.28	7.45	6.86	1.22	3.54	4.01	2.19	2.73	3.66	2.05	2.11	1.88	2.16	10.83	0.68	1.57	2.88	3.71	1.01	1.22	1.41	1.43	1.84	0.99	2.99	1.11	2.6	2.19	3.12	2.07	1.61	3.37	5.1	3.44	3.76
ANKRD36BP1	33.55	8.94	51.35	33.43	15.46	27.43	34.13	42.26	37.61	49.64	37.39	69.07	54.27	26.96	51.57	42.19	12.12	12.91	7.23	7.43	10.82	16.19	7.88	6.85	6.14	14.4	14.07	7.62	7.67	10.06	5.31	6.53	21.78	13.1	11.41	10.96	13.89	9.89	21.39	9.74	29.37	16.11	25.77	36.39	15.72	60.13	25.18	28.21	24.23
ANKRD36BP2	0.94	1.85	0.49	0.06	1.7	0.68	0	8.56	1.55	1.82	0.51	0.59	0.2	0.27	2.27	11.13	18.86	0.48	2.43	1.08	1.56	1.59	3.87	1.62	0.25	0.53	0.18	15.98	3.79	5.87	13.92	5.12	0.15	3.92	0.04	0.14	0.96	1.29	0.36	0.1	0.14	2.08	0.08	0.83	0.57	0.36	5.76	3.82	1.12
ANKRD37	3.25	7.44	12.42	8.61	6.59	10.09	45.56	5.96	10.46	5.54	19.1	16.5	3.31	12.28	4.85	102.9	5.34	111.33	5.99	3.13	2.25	5.59	1.42	23	14.75	26.87	5.86	2.71	5.99	8.11	4.36	21.31	5.59	1.85	6.96	1.72	2.74	3.24	3.24	9.09	0.86	2.27	3.92	2.42	3.83	5.23	3.44	7.7	6.91
ANKRD39	20.04	34.26	24.17	27.79	22.2	19.76	17.4	21.15	31.18	13.04	27.08	21.54	15.81	11.36	16.89	25.84	22.05	12.6	49.65	19.02	25.43	39.67	35.77	39.29	33.3	64.97	41.81	15.28	20.25	27.43	21.59	28.71	27.4	23.74	27.75	29.16	24.5	29.5	23.16	26.4	17.87	44.79	33.29	17.88	23.53	14.72	21.02	15.57	24.52
ANKRD40	43.89	22.02	26.52	38.34	28.04	37.74	40.04	27.65	34.51	43.26	35.61	39.75	52.9	45.39	45.83	32.15	20.7	25.95	24.48	31.69	20.24	23.23	27.19	23.09	31.14	37.16	20.2	17.41	13.39	22.8	19.57	13.72	21.19	22.89	29	47.31	31.41	21.14	31.98	49.84	35.1	24.8	28.84	29.71	30.03	38.49	27.35	44.95	42.73
ANKRD42	5.96	4.89	10.07	7	6.96	7.56	12.75	8.94	5.96	10.71	8.3	10.68	8.52	10.82	8.69	16.05	6.01	5.5	3.63	3.92	6.02	5.99	5.1	6.07	3.46	7.96	9.18	3.18	3.59	9.51	5.21	5.71	2.59	3.36	8.46	8.36	9.25	4.41	8.78	7.15	18.6	4.82	10.72	7.58	3.57	7.53	8.29	17.79	6.96
ANKRD44	3.47	5.05	5.26	3.06	4.14	3.21	2.5	7.13	4.58	15.25	5.51	3.18	4.09	5.19	14.86	10.99	8.47	6.93	1.84	3.51	2.88	9.75	9.38	2.65	1.27	4.44	1.81	8.63	2.5	5.88	5.27	6.15	3.15	4.43	2.19	0.98	6.05	11.79	5.2	1.9	2.17	2.42	0.57	4.66	5.41	4.37	10.85	7.18	1.43
ANKRD44-IT1	0	0.15	0.31	0.25	0.16	0.13	0.31	0.18	0.18	0.06	0.1	0.41	0.12	0.05	0.11	0.46	0.09	0.12	0	0	0.05	0	0.34	0.18	0.21	0.16	0.12	0.24	0	0.06	0.37	0	0	0.06	0.07	0	0.05	0.21	0.06	0.06	0.12	0.12	0	0.08	0	0.06	0.44	0.29	0.11
ANKRD45	0.13	0.03	0.55	0.24	0.25	0.61	1.15	0.87	4.44	0.5	0.45	1.01	0.35	0.47	0.58	1.29	0.06	0.17	0.11	0.21	0.26	1.04	0.03	0.03	0.04	1.64	0.05	0.36	0.37	0.13	0.03	0.08	0.17	0.28	0.05	0.83	0.04	0.13	0.42	0.15	1.23	1.29	0.15	0.16	0.91	2.79	0.34	0.55	0.26
ANKRD46	17.53	7.08	18.4	8.41	10.34	17.09	21	21.16	30.27	12.2	10.3	20.75	14.18	11.34	16.43	9.29	7.24	11.5	12.97	6.71	6.72	6.21	9.73	7.16	18.67	16.95	14.85	6.45	8.52	9.09	9.16	3.83	3.55	15.67	10.26	17.98	7.86	6.28	11.74	14.13	23.71	8.02	15.18	20.2	8.8	26.66	12.58	11.63	7.79
ANKRD49	18.93	5.6	28.01	13.16	11.29	13.46	11.7	26.34	20.33	17.12	13.72	20.63	28.75	18.86	20.77	25.01	9.54	8.59	9.84	8.06	7.67	9.87	12.77	8.53	4.63	11.8	7.82	6.39	5.8	8.66	9.57	6.03	8.39	7.8	17.95	11.91	7.31	7.09	10.45	10.49	30.75	6.39	23.82	14.13	6.86	16.71	14.31	15.12	16.64
ANKRD50	5.9	5.08	9.84	11.21	8.99	22.77	6.86	4.88	10.94	27.04	9.46	7.75	10.09	24.63	18.23	9.74	3.9	8.95	4.46	6.31	4.35	7.07	7.9	6.14	2.54	8.37	5.49	4.48	2.76	4.87	5.9	2.85	8.78	7.22	23.85	8.12	12.51	5.74	17.7	7.55	7.5	4.53	4.59	7.46	10.37	13.37	9.3	13.7	3.28
ANKRD52	13.26	29.57	24.94	24.67	37.38	22.85	15.81	47.31	29.54	32.77	29.55	37.25	25.52	25.32	21.01	12.74	26.1	14.05	25.65	21.28	27.88	36.98	26.19	11.51	18.26	51.41	30.58	16.69	16.64	33.35	13.16	13.46	17.33	33.01	34.34	41.76	23.51	22.74	37.86	20.81	39.45	30.98	39.31	42.67	40.95	57.68	23.98	36.98	24.88
ANKRD53	0.1	0.43	0.32	0.1	0.36	0.25	0.18	0.35	3.29	0.97	0.33	0.07	0.53	0.6	0.54	1.11	1.19	0.74	1.99	1.05	0.53	0.52	0.39	0.41	0.48	1.39	0.15	1.25	0.79	0.72	1.34	0.45	0.34	0.66	1.64	0.88	0.6	1.48	0.79	0.52	0.36	0.77	0.27	0.17	1.33	0.27	0.55	0.92	0.11
ANKRD54	15.12	20.78	9.37	20.5	26.69	10.35	24.42	14.06	12.98	17.94	14.66	9.67	12.45	26.83	13.27	20.39	21.03	19.04	31.32	19.23	28.17	30.82	16.36	13.31	14.56	19.53	25.15	10.53	13.61	14.75	11.02	15.1	21.79	31.45	16.25	41.4	21.19	15.11	21.54	35.13	34.34	25.38	18	23.53	21.71	18.81	16.7	26.59	14.99
ANKRD55	0.06	0.06	0.14	0.3	0.09	0.12	0.06	0.16	0.07	0.58	0.04	0.05	0.11	0.3	0.35	0.63	0.18	0.28	0.02	0.06	0.28	0.27	0.48	0.07	0.06	0.07	0.02	0.29	0.2	0.09	0.15	0.34	0.3	0.14	0.03	0.05	0.21	1.33	1.16	0.02	0.1	0.07	0	0.17	0.21	0.02	0.37	0.09	0.2
ANKRD6	0.25	0.84	1.19	0.57	5.62	0.73	1.14	1.5	4.07	3.67	0.96	0.52	0.42	2.91	3.39	3.11	0.86	4.16	0.76	4.1	0.75	1.11	5.36	2.22	0.63	4.6	0.07	1.32	0.48	1.56	2.03	0.61	0.46	0.89	6.31	6.46	3.47	2.08	1.7	0.94	1.66	0.99	0.63	1.6	2.21	0.88	1.3	4.52	0.3
ANKRD60	0.16	0.07	1.37	0.55	0.22	1.07	1.6	0.42	0.34	0.22	0.09	1.6	0.53	0.41	0.17	1.02	0.11	0.11	0.14	0.24	0.13	0.1	0.13	0.03	0.28	0.07	0.14	0.39	0.1	0.14	0.18	0.06	0.15	0.08	0.16	0.11	0.14	0.2	0.41	0.08	0.21	0.15	0.35	0.25	0.09	0.22	0.25	0.9	0.99
ANKRD61	1.01	0.28	1.66	1.09	0.43	1.31	0.17	0.96	1.63	1.03	0.64	1.28	2.51	1.23	2.18	0.65	0.2	0.3	0.49	0.12	0.33	0.2	0.12	0	0.31	1.13	0.26	0	0.48	0.43	0.22	0.23	0.43	0.21	0.3	0.74	0.3	0.2	0.18	0.58	0.91	0.13	0.87	0.67	0.38	1	0.99	0.29	0.32
ANKRD62	0.1	0.11	1.22	0.39	0.29	0.77	1.38	0.22	0.27	0.25	0.09	1.63	0.3	0.16	0.16	0.6	0.15	0.29	0.16	0.18	0.09	0.23	0.33	0.07	0.23	0.21	0.18	0.05	0.11	0.09	0.19	0.15	0.03	0.12	0.1	0.06	0.22	0.09	0.3	0.06	0.25	0.39	0.5	0.56	0.11	1.11	0.34	1.1	0.67
ANKRD62P1-PARP4P3	0.07	0	0	0	0	0	0	0	0	0.12	0	0	0	0	0.11	0.04	0	0	0	0.13	0	0	0	0	0.07	0.33	0	0	0.11	0	0	0	0	0	0	0	0.03	0.09	0	0	0	0.63	0	0	0	0.16	0.07	0.04	0.04
ANKRD63	0	0.07	0	0	0.05	0	0	0.05	2.04	0	0	0	0.11	0.05	0	0.06	0.08	0	0	0.07	0.05	0	0	0	0	0	0	0	0	0	0	0	0	0	0.13	0.06	0	0	0	0.05	0	0.05	0	0	0.08	0.06	0	0.22	0
ANKRD65	0.42	4.06	2.15	0.72	1.45	1.61	2.25	2.69	6.6	6.33	1.2	1.22	1.53	4.16	3.92	5.2	7.19	13.81	5.81	10.77	2.65	5.17	7.61	1.63	2.61	91.68	0.91	11.13	3.74	4.21	15.82	2.85	2.22	4	5.56	9.88	10.28	14.27	11.14	23.95	2.76	3.07	0.5	2.07	12.74	30.89	2.31	4.16	0.92
ANKRD66	0	0	0	0	0	0	0	0	0.06	0	0	0.07	0	0	0	0.07	0	0	0	0.16	0	0	0	0	0	0.57	0	0	0	0	0	0.21	0	0	0.14	0	0	0.07	0	0	0	0	0	0	0	0.06	0	0	0
ANKRD7	0.04	0	0.7	0	0.04	0.1	0.12	0.09	0	0.05	0	0.16	0.09	0.08	0.13	0.2	0.07	0.04	0	0.25	0	0	0	0	0	1.51	0	0	0	0	0.11	0	0	0	0	0.05	0.08	0	0	0.04	0	0	0.05	0	0.07	0	0.04	0.22	0.13
ANKRD9	13.31	34.49	12.4	16.21	30.04	9.63	12.74	14.72	16.41	12.27	11.95	11.46	13.21	6.4	16.87	7.46	33.33	20.69	53.26	23.71	72.72	32.84	12.22	15.55	50.09	50.32	36.5	16.11	74.03	44.38	34.09	31.78	18.29	54.32	11.87	16.79	16.1	33.32	33.33	15.38	25.26	31.76	36.52	18.95	36.66	6.6	17.34	19.35	16.76
ANKS1A	21.66	16.79	31.68	20.42	22.31	25.39	18.89	23.92	38.71	25.73	20.33	26.28	20.67	24.29	26.59	26.07	14.78	21.48	11.79	14.97	16.71	14.21	12.95	9.21	17.56	17.33	13.74	9.78	12.18	17.07	10.7	10.82	11.99	16.52	11.64	21.96	14.83	14.89	23.23	27.64	34.19	19.09	12.08	37.05	25.75	46.13	16.48	33.59	23.73
ANKS1B	0.03	0.12	0.44	0.03	0.12	0.29	0.24	0.16	0.46	0.33	0.13	0.35	0.04	0.27	0.61	0.64	0.25	1.03	0.06	0.14	0	0.3	0.22	0.13	0.16	0.48	0.15	0.48	0.25	0.12	0.25	0.09	0.06	0.07	0.4	0.83	0.22	0.35	0.37	0.1	0.2	0.14	0.1	0.03	1.6	0.05	0.38	0.71	0.41
ANKS3	3.08	4.5	3.62	7.37	7.61	4.15	7.45	5.6	3.08	7.22	2.74	4.83	4.01	8.75	5.11	2.95	4.18	4.27	9.22	7.88	5	6.89	6.66	2.95	4.93	10.23	6.12	3.55	1.7	5.76	3.86	2.04	3.83	7.65	4.53	10.62	8.56	5.84	7.2	8.84	10.59	4.08	7.02	6.58	5.68	3.43	5.63	8.91	4.58
ANKS4B	18.99	19.4	37.68	27.33	39.2	1.77	1.63	26.64	2.53	15.79	33.77	25.9	29.51	22.13	10.36	30.61	10.9	2.48	8.89	25.25	33.05	0.47	4.78	0.2	0.59	0.21	18.67	4.78	42.65	16.77	6.71	12.52	10.61	24.46	13.2	35.96	28.78	11.61	18.11	7.63	48.34	8.31	21.63	44.62	37.2	0.65	15.46	35.8	21.25
ANKS6	19.16	14.57	13.29	16.8	11.24	22.01	3.41	21.17	10.4	11.73	7.08	18.28	12.45	15.2	22.89	7.33	12.13	7.22	13.19	9.04	9.33	19.87	16.34	4.61	14.18	8.99	6.99	2.96	3.6	11.35	4.09	4.39	11.63	15.61	6.36	13.2	6.2	7.06	8.14	7.39	25.21	10.5	23.79	12.76	12.1	14.32	13.49	9.29	14.44
ANKUB1	0	0	0.12	0.02	0	0.19	0.03	0	0	0.02	0	0.16	0	0	0.02	0.3	0	0.02	0	0	0	0	0	0	0.04	0.52	0	0	0	0	0	0	0	0	0.03	0	0	0	0.02	0	0	0.02	0	0	0.04	0	0.02	0.05	0.13
ANKZF1	15.14	17.17	28.63	26.76	20.28	17.79	42.26	36.8	26.52	13.31	13.06	12.06	17.79	14.65	12.36	16.53	11.64	13.62	30.79	14.32	14.46	17.08	14.94	14.37	22.55	20.69	17.69	11.87	7.84	16.79	11.66	14.42	15.61	20.62	32.87	15.91	11.63	14.03	15.19	22.06	25.3	23.76	20.34	19.62	14.42	22.05	19.88	30.65	24.51
ANLN	80.01	36.9	57.56	106.42	59.22	77.75	13.92	26.87	45.64	19.03	34.41	91.8	58.31	54.37	32.5	47.5	25.66	11.88	18.72	11.51	14.34	23.91	15.2	22.09	74.61	19.66	53.07	5.19	3.55	9.34	3.94	10.05	25.11	22.1	36.65	15.4	16.6	6.08	24.62	58.66	51.23	20.8	54.46	47.59	28.1	146.14	16.48	35.56	64.85
ANO1	4.43	15.34	74.94	48.59	77.74	82.06	18.47	15.87	11.81	61.4	20.38	65.49	92.89	25.67	125.89	11.21	137.54	5.53	12.03	68.38	17.67	40.8	56.97	71.65	92.36	6.88	140.4	22.67	6.96	41.28	43.07	9.65	81.24	38.78	47.44	22.25	26.09	12.77	70.65	46.7	29.14	18.85	4.58	13.47	30.66	8.01	30.9	40.85	228.15
ANO1-AS2	0	0.21	0.17	0.07	0.45	0.63	0.11	0	0	0.09	0	0.68	0.34	0	0.24	0	0.12	0	0.09	0.22	0.07	0	0.12	0.12	0.37	0	0.08	0	0	0.08	0.21	0	0.1	0.08	0.38	0	0.07	0	0.17	0	0	0	0	0	0.49	0	0	0.25	0.31
ANO10	27.11	10.22	16.42	18.22	27.96	17.06	31.28	32.22	18.9	24.78	21.47	17.61	18.7	23.99	19.95	16.99	24.17	35.73	23.96	25.47	41.44	18.3	18.73	6.87	18.13	17.75	14.86	11.76	59.26	29.31	15.63	22.31	14.91	29.77	19.24	40.5	20.79	25.84	32.43	17.45	24.24	36.14	18.81	55.5	32.44	48.79	22.07	17.73	20.16
ANO2	0.31	0.14	0.36	0.19	0.24	0.13	0.67	0.82	0.7	1.71	0.53	0.26	0.24	0.66	0.61	0.41	0.45	0.35	0.5	0.88	0.94	0.23	0.54	0.14	0.14	0.39	0.14	0.51	0.27	0.62	0.39	1.15	0.18	0.7	0.09	0.13	0.37	0.93	0.82	0.04	0.38	0.56	0.3	0.67	0.19	0.33	0.14	0.28	0.07
ANO3	0.02	0.01	0.06	0.31	0.35	0.04	1.23	0.03	0.13	0.26	0.02	0.1	0.14	0.38	0.02	0.01	0	0.05	0.07	0.1	0	0.01	0.36	0.15	0.05	0	0	0	0.05	0	0.05	0.17	0.01	0.02	7.56	1.45	0.01	0.09	0.1	0.18	0.28	0.03	0.04	2.3	1.06	0.07	0	2.3	0.02
ANO4	0.04	0.02	0.29	0.05	0.4	0.17	0.02	0.25	0.38	0.14	0.1	0.09	0.06	0.73	0.08	0.16	0	0	0	0.12	0.56	0	0.04	0.05	0	0.11	0	0	0.94	0.08	0.06	0.03	0	0.18	0.02	0.25	0.07	0.11	0.2	0.03	0.01	0	0.03	3.81	0.02	0.26	0.04	0.27	0.01
ANO5	0.2	0.11	1.09	3.76	1.1	2.46	0.08	0.53	1.26	2.61	0.09	0.4	0.08	5.59	2.74	3.03	1.44	0.92	0.08	1.3	0.11	0.2	0.55	3.97	0.05	0.96	0.1	1.43	2.36	3.09	1.79	1.08	0.1	0.32	1.7	8.58	1.35	0.13	0.94	0.79	3.06	2.14	0.06	0.96	0.81	0.46	0.34	2.23	0.27
ANO6	49.37	25.99	67.65	68.46	38.82	54.05	69.39	79.85	42.86	80.73	59.78	66.15	44.08	52.44	56.32	41.07	16.43	17.8	20.7	32.89	29.02	32.1	27.81	19.39	22.79	12.91	28.68	10.56	31.66	18.56	12.51	13.46	24.44	30.75	12.9	35.75	40.39	21.84	45.25	33.77	33.8	14.44	36.5	89.85	44.69	43.7	30.82	54.3	46.15
ANO7	0.66	0.66	1.15	1.52	1.14	1.21	2.55	7.16	4.58	1.28	0.61	2.39	0.52	1.49	10.49	1.74	12.1	0.88	21.29	0.85	0.21	1.39	0.76	0.92	1.9	2.37	3.07	6.23	3.65	3.37	10.17	11.43	0.12	0.84	2.9	2.53	0.54	0.49	1.51	2.34	1.08	6.78	0.46	0.75	0.64	4.84	0.18	1.24	0.08
ANO8	2.1	5.18	2.69	1.98	11.21	6.57	9.87	3.7	7.89	5.75	4.77	4.22	8.82	3.41	4.55	4.24	6.39	11.76	8.4	5.85	5.01	6.66	7.19	4.2	3.24	4.46	6.35	5.53	2.99	4.22	5	5.55	3.65	6.18	14.2	2.8	6.84	3.88	6.13	7.21	9.52	4.63	3.73	4.08	6.66	8.37	6.23	7	6.52
ANO9	30.39	15.79	62.55	14.45	33.47	11.61	15.88	28.83	8.34	7.36	33.73	22.88	31.85	7.47	12.45	8.17	10.75	10.51	14.54	7.48	80.85	16.85	22.48	12.76	7.48	12.59	29.57	8.42	43.5	14.83	8.89	24.43	13.82	36.97	16.67	20.04	11.14	46.91	25.83	13.02	25.52	9.58	29.05	42.84	26.34	21.15	20.07	37.03	26.56
ANP32A	68.59	109.11	101.9	102.79	81.89	115.74	106.04	124.38	71.54	62.36	94.66	82.82	90.39	56.63	90.38	77.15	73.76	48.46	76.01	139.76	98.32	90.28	87.72	82.44	95.51	101.98	86.04	74.66	51.25	80.47	92.45	60.38	90.14	94.49	70.32	83.36	82.12	73.64	79.96	143.52	56.89	46.58	112.84	87.7	65.99	134.74	89.05	96.88	112.2
ANP32A-IT1	0.35	0.4	1.65	0.86	0.85	1.1	2.5	0.99	0.99	0.73	0.5	1.32	1.1	0.43	0.81	1.08	0.38	0.27	0.39	0.67	0.25	0.22	0.39	0.22	0.27	0.27	0.28	0.58	0.35	0.33	0.32	0.35	0.18	0.33	0.24	0.39	0.25	0.27	0.39	0.24	0.47	0.21	0.64	0.67	0.38	2.65	1.38	0.93	1.06
ANP32AP1	0	0	0	0	0	0	0	0.09	0	0	0.06	0.11	0.1	0	0	0	0	0	0	0	0.08	0	0	0	0.26	0	0	0	0	0	0	0	0.26	0	0	0.09	0	0	0	0	0.19	0	0	0	0	0.29	0.09	0.18	0.35
ANP32B	240.15	182.55	229.3	366.38	223.55	263.27	113.43	323.81	218.33	156.03	262.35	309.36	242.47	182.19	209.31	262.69	173.8	142.5	214.8	242.48	238.42	223.29	227.2	207.29	273.11	255.23	309.66	195.05	129.59	153.83	171.58	176.31	217.8	291.47	147.81	127.54	150.03	209.04	214.84	158.75	255.02	157.48	329.05	165.31	216.97	176.83	193.72	199.39	283.69
ANP32C	0	0	0	0	0	0	0	0	0.1	0	0	0	0	0	0	0	0	0	0	0	0	0	0	0	0	0	0	0	0.27	0	0	0	0	0	0	0	0	0	0	0	0	0	0	0	0	0	0	0	0
ANP32D	0	0	0	0	0	0	0	0	0	0.24	0	0	0	0	0.23	0	0	0	0	0	0	0	0	0	0	0	0	0	0	0	0	0	0	0	0	0	0	0	0	0	0	0.2	0	0.28	0	0	0	0.22	0
ANP32E	41.2	24.86	43.09	56.78	41.32	80.35	27.94	59.32	97.7	23.84	42.43	48.5	30.53	75.47	31.6	42.02	24.46	21.93	56.99	22.84	34.14	47.22	20.21	38.05	38.63	34.9	44.56	17.92	11.81	25.28	15.46	16.51	20.56	37.2	48.3	36.56	33.37	22.87	38.92	29.95	41.43	27.6	46.79	58.14	31.47	173.95	40.73	33.45	47.5
ANPEP	8.9	6.6	471.59	650.45	1099.92	3.71	4.24	3378.51	31	227.24	1640.27	6.58	521.13	112.37	57.22	157.06	78.16	110.04	21.28	1036.62	2240.08	15.56	6.07	12.94	58.84	5.5	11.85	13.23	4837.34	990.58	14.68	775.26	5.27	300.17	3.14	67.37	2214.11	942.7	487.75	109.7	20.91	29.9	81.91	2133.81	169.3	27.06	7.11	114.03	3.67
ANTXR1	18.64	72.56	61.08	22.85	183.26	47.1	60.83	110.18	81.37	229.66	144.23	23.16	23.09	233.93	100.1	69.33	17.31	31.35	21.16	156.38	33.98	20.09	17.5	47.08	63.86	35.54	7.17	11.93	15.9	14.19	16.56	23.15	33.82	38.83	55.95	114.29	133.78	154.98	127.14	120.45	28.4	33.84	18.34	179.07	125.72	69.43	66.1	277.33	23.7
ANTXR2	9.44	10.75	43	68	21.1	22.81	6.31	16.36	14.37	51.53	48.53	15.02	25.52	37.18	29.82	16.96	13.54	12.41	11.36	34.59	25.26	49.4	10.21	14.28	53.81	25.02	8.58	11.54	25	11.42	12.41	19.33	4.51	19.93	64.1	27.56	38.34	26.59	59.48	37.75	67.4	10.58	37.13	30.92	29.75	21.63	20.75	42.28	4.12
ANTXRL	0	0	0	0	0	0.03	0.03	0	0	0	0	0.03	0	0	0	0	0.04	0.03	0.03	0	0	0	0	0	0.02	0	0	0	0.07	0	0	0	0	0.05	0	0	0.02	0	0	0	0	0	0.03	0	0	0	0	0.02	0.07
ANTXRLP1	0.06	0.17	0.2	0.05	0.05	0.17	0	0.16	0	0.07	0.13	0	0.13	0	1.09	1.06	0.3	0.45	0.17	0.36	0.23	0.94	1.09	0.16	0.1	0.18	0.13	1.3	0.18	0.22	1.15	0.23	0.41	0.19	0.07	0	0.6	3.83	0.2	0	0	0.06	0	0.15	0.29	0.07	0.99	0.37	0.06
ANXA1	54.07	349.62	129.26	420.03	159.75	402.3	118.77	142.16	68.98	709.43	88.71	256.91	271.89	961.63	179.21	1787.28	160.2	6439.71	64.67	220.85	94.42	234.07	81.24	642.22	627.88	103.29	74.95	53.18	38.84	46.8	56.28	173.04	265.46	65.96	793.96	174.79	113.68	214.76	366.55	670.32	50.77	47.17	88.08	116.63	102.88	52.14	117.26	116.68	91.28
ANXA10	58.29	611.83	88.24	269.64	8.6	2.39	0.16	0.78	170.54	580.16	7.59	7.62	38.13	0.77	417.41	111.64	1235.33	3.27	81.95	132.2	92.96	6.62	68.96	3.48	84.85	0.53	62.31	522.76	119.58	296.83	585.44	338.01	352.95	105.05	223.79	0.64	64.86	8.82	424.97	8.71	20.95	28.15	0.29	15.69	1.31	14	29.14	0.37	8.36
ANXA11	132.05	680.36	250.21	197.03	454.34	276.22	124.09	134.55	201.36	254.18	309.76	92.99	205.02	138.66	245.63	272.63	447.5	485.41	240.57	639.98	428.59	422.81	290.49	383.2	369.15	169.1	798.7	262.69	301.45	526.28	360.17	379.78	393.96	377.18	431.63	1009.71	327.5	399.62	508.84	480.87	496.27	261.05	169.22	311.06	344.68	176.42	280.47	322.62	363.84
ANXA13	7.56	0.49	209.22	75.98	58.08	1.18	38.71	512.87	15.75	35.29	6.28	118.74	547.69	14.94	8.99	44.57	2.44	0.12	18.59	61.09	53.87	0.43	49.09	0.06	0.61	0.17	31.19	0.5	201.78	49.95	0.16	2.16	2.17	113.94	20.33	146.91	3.78	30.98	52.95	0.65	59.71	5.12	37.58	163.43	216.67	1.95	2.92	44.34	25.52
ANXA2	1318.36	1628.34	3522.83	2975	1433.33	3670.99	559.45	2088.04	1026.06	1961.47	2115.89	1388.28	2478	1954.85	1398.81	1983.21	1642.93	2277.13	581.96	2141.67	1902.98	1802.17	850.49	1248.73	2350.93	1024.39	1365.68	477.15	1628.02	888.32	567.37	1159.12	2225.7	1440.68	2311.5	1044.66	1335.83	982.53	2393.02	2386.9	1379.71	804.51	1121.3	1980.18	555.43	1083.72	518.39	945.29	1414.53
ANXA2P1	0.08	0.66	0.83	0.37	0.47	1.2	0.42	0.37	0.28	0.55	0.7	0.59	0.53	0.29	0.09	0.1	0.42	0.05	0.29	0.44	0.43	0.13	0.13	0.14	0.33	0.13	0.28	0	0.39	0.05	0.29	0.25	0.23	0.32	0.53	0.28	0.13	0.26	0.39	0.04	0.47	0.23	0.47	1.11	0.14	0.63	0.26	0.63	0.27
ANXA2P2	0	0.09	0.08	0.12	0	0	0	0	0.09	0	0.06	0.27	0.08	0	0	0.09	0	0	0.07	0.39	0	0.09	0.09	0.34	0.36	0	0.09	0	0	0	0	0.24	0.24	0	0.41	0.09	0.17	0.16	0.22	0.14	0.07	0	0.31	0	0	0	0	0.3	0.32
ANXA2P3	0	0.06	0.05	0	0.04	0	0	0	0.05	0.05	0	0	0.05	0.08	0	0.05	0.07	0.14	0	0.06	0	0	0	0	0.04	0	0.05	0	0	0.05	0	0.08	0.06	0	0	0.05	0	0	0	0	0.09	0	0	0	0	0.34	0	0.18	0
ANXA2R	0.81	2.03	4.61	3.41	1.42	1.74	1.07	2.33	6.06	3.58	1.17	7.6	3.57	3.62	5.35	3.5	3.91	3.17	9.17	2.76	2.66	3.15	7.47	4.86	21.76	2.07	1.34	5.46	1.23	4.27	3.61	3.55	2.25	4.76	6.01	1.81	5.93	10.36	4.32	8.86	3.38	1.44	5.57	1.3	5.15	3.47	4.23	1.65	0.82
ANXA3	161.58	153.63	138.94	72.01	95.9	304.57	71.53	154.6	78.65	166.57	129.47	157.78	47.97	64.48	182	33.08	241.37	144.56	101.12	118.12	118.3	112.47	136.62	87.33	238.41	15.03	32.93	78.32	36.96	130.01	96.64	83.06	215.76	52.93	175.78	186.67	71.35	26.65	131.25	247.24	103	78.46	73.66	101.81	9.27	169.97	47.52	147.32	148.07
ANXA4	292.74	411.23	602.77	640.27	551.24	114.21	176.28	574.26	388.72	290.42	504.5	558.97	452.57	578.81	403.42	435.16	225.05	120.27	220.39	564.04	239.94	365.4	179.49	168.35	125.61	159.01	156.74	141.09	273.24	699.96	178.31	240.94	447.27	242.02	579.14	560.43	715.41	140.69	431.23	261.35	358.62	226.21	290.9	768.45	153.02	87.9	169.72	352.16	240.56
ANXA5	225.83	291.32	457	1081.49	588.81	1576.11	741.91	415.15	530.91	964.19	479.33	188.65	355.37	1399.75	588.49	516.45	668.68	201.11	346.17	633.53	335.87	474.71	208.27	746.48	516.46	393.48	246.64	241.03	182.53	315.09	237.38	337.02	139	267.52	812.76	550.67	432.63	562.9	759.6	496.51	321.98	522.07	236.74	414.39	446.48	538.8	474.08	423.82	49.87
ANXA6	107.83	58.11	42.03	57.12	67.39	32.6	44.5	50.79	47.52	129.11	42.4	23.12	25.01	97.32	96.76	48.25	73.25	57.69	97.26	191.4	66.05	100.91	123.26	49.49	46.67	32.54	21.54	101.65	52.35	64.11	85.24	80.42	38.89	91.55	48.35	71.54	112.59	231.08	155.12	127.83	37.58	197.83	107.88	58	311.36	68.73	102.23	112.38	18.49
ANXA7	91.58	103.1	138.09	119.5	114.2	107.21	140.8	274.76	148.61	129.3	112.01	74.78	97.56	102.33	144.37	137.02	104.14	118.42	67.14	93.09	89.34	120.11	91.59	103.34	126.52	156.79	89.49	63.62	47.64	136.15	74.47	63.02	75.37	80.15	189.87	171.39	96.72	113.81	104.53	138.71	107.22	57.85	250.28	103.64	180.01	162.26	82.37	86.37	66.92
ANXA8	0.08	0.71	2.61	14.77	0.37	0.85	0.09	0.27	0.15	1.68	0	0	0.17	0	0.46	75.03	0	317.47	0.34	10.93	0.75	89.31	3.13	35.1	61.09	1.8	0	0	0	0.29	0.12	0.26	25.04	0.06	15.21	0.16	0.14	0.06	1.51	100.54	0.19	0.25	0	0	0.76	0.1	0.11	0.54	0.16
ANXA8L1	0	0.49	1.74	7.33	0.51	0.37	0.27	0.14	0.23	0.86	0.15	0.25	0	0.1	0.32	20.61	0.05	188.94	0.66	12.74	0.84	51.94	2.24	15.86	47.7	2.85	0.03	0.25	0	1.1	0	0.17	36.99	0	3.75	0.16	0.09	0.17	0.77	130.53	0.15	0.49	0.22	0.13	0.1	0.25	0.05	1.49	0.2
ANXA9	54.65	20.57	10.72	1.34	3.88	5.03	23.69	26.51	3.61	12.87	1.55	2.23	4.66	3.78	14.04	11.61	3.63	28.69	111.27	3.35	1.92	1.62	11.34	0.79	23.45	1.44	4.27	0.4	2.58	30.03	1.23	1.53	17.13	10.42	4.61	82.77	6.46	3.21	8	74.4	19.05	11.79	21.6	21.92	6.94	60.8	13.83	9.66	6.46
AOAH	10.79	7.3	21.08	4.5	10.32	5.37	2.97	32.92	6.21	42.12	10.86	2.41	10.04	5.18	36.38	24.33	8.18	13.4	6.32	3.75	13.68	22.15	19.53	9.25	2.92	1.57	2.71	17.06	3.64	11.66	12.57	18.38	14.47	9.78	3.22	4.82	21.82	41.36	10.75	4.32	2.15	3.87	6.28	6.37	14.52	9.12	48.46	15.39	2.61
AOAH-IT1	0.23	0	0	0	0	0	0	0	0	0.27	0.11	0	0	0	0	0.15	0	0	0	0	0.11	0	0	0	0	0	0	0	0	0	0	0	0	0	0	0	0	0.29	0	0	0	0	0	0.17	0	0.26	0.24	0	0
AOC1	206.13	54.37	145.8	23.42	248.53	2.19	1.6	135.67	15.98	118.93	85.29	29.4	245.63	2.41	123.92	45.84	95.85	28.04	354.42	118.5	229.86	2.01	36.15	12.85	42.94	19.57	72.49	19.23	642.88	177.17	28.88	614.75	143.65	210.8	148.95	144.39	170.83	86.63	372.71	4.69	183.45	208.4	270.95	379.26	248.84	26.87	35.81	106.68	91.78
AOC2	0.28	0.27	0.29	0.51	0.08	0.42	0.67	0.86	0.41	0.7	0.12	0.32	0.34	1.08	0.47	0.89	0.31	0.48	0.16	0.37	0.2	0.71	1.06	1.61	0.52	0.61	0.41	0.64	0.19	0.27	0.3	0.16	0.2	0.27	0.4	0.16	0.28	0.27	0.53	0.59	0.6	0.22	0.28	0.71	0.17	0.83	0.42	0.48	0.92
AOC3	2.77	17.12	18.86	7.12	21.24	8.92	9.57	20.86	8.09	55.99	12.06	4.71	5.72	37.13	46.26	14.5	12.59	26.19	6.92	59.2	25.17	19.59	22.97	11.5	9.6	7.83	3.61	15.8	20.49	8.07	19.19	11.46	9.71	26.64	4.91	48.8	54.82	48.83	66.09	29.44	21.76	21.86	9.74	14.04	54.91	10.71	18.99	26.13	4.4
AOC4P	0.05	0	0.21	0.19	0.08	0.19	0.33	0.12	0	0.55	0.01	0.24	0.22	0.35	0.37	0.2	0	0.18	0.03	0.33	0.13	0.14	0.31	0	0.06	0	0	0.25	0	0.03	0.04	0.12	0.04	0.03	0	0.05	0.13	0.14	0.31	0.15	0.12	0.09	0.14	0.09	0.3	0.07	0.14	0.33	0.08
AOX1	0.11	0.92	1.54	7.05	0.98	0.39	0.04	2.75	2.07	11.89	2.05	0.3	0.1	5.87	7.12	1.59	1.39	1.52	0.55	2.81	0.73	0.7	0.67	1.52	0.27	0.13	0.26	0.95	1.29	0.91	0.67	0.25	0.04	1.67	0.63	32.51	19.01	22.69	2.19	1.48	0.58	0.97	0.41	1.78	6.85	0.37	1.35	2.44	0.13
AOX2P	0	0	0	0.03	0	0	0.02	1.38	0	0	0	0	0.04	0	0	0	0.02	0	0	0	0.01	0	0	0	0.01	0	0	0	0.04	0	0	0	0	0	0	0	0	0	0	0	0	0	0	0.02	0	0	0	0	0.01
AP1AR	23.41	13.42	26.94	21.23	17.49	37.06	31.95	21.4	19.91	19.67	39.27	22.95	47.63	28.36	24.07	20.17	14.01	18.86	12.88	15.26	25.61	18.9	19.16	21.27	14.12	28.26	29.39	9.14	18.68	15.26	10.92	10.48	12.58	12.57	32.37	16.01	14.93	10.76	22.29	29.32	24.32	9.05	18.95	15.58	11.89	16.99	11.75	35.22	23.24
AP1B1	110.43	98.94	71.49	103.45	126.98	51.17	47.77	73.43	52.1	108.41	103.53	47.39	59	65.53	80.87	65.64	132.77	151.82	105.29	92.97	129.15	107.36	90.71	64.55	73.2	83.73	76.74	85.57	96.16	72.54	66.04	95.8	105.82	95.19	59.21	220.26	147.04	157.18	139.94	185.44	150.59	75.74	134.55	151.93	184.97	109.11	132.76	136.19	102.17
AP1B1P1	0	0	0.17	0	0	0.35	0.11	0	0	0	0	0.19	0	0	0.16	0.45	0	0	0	0	0	0.09	0.11	0	0	0	0	0	0	0	0	0	0	0	0	0.08	0	0	0	0	0	0	0.09	0.22	0	0	0	0.24	0
AP1G1	75.59	18.73	67.55	46.07	37.53	49.25	73.26	44.94	75.57	66.09	58.33	59.74	48	49.02	53.09	39.63	47.49	44.57	23.32	30.66	27.6	32.12	30.09	24.16	14.63	41.52	33.58	28.21	27.38	32.01	27.53	18.6	27.58	28.8	18.46	47.11	37.8	18.54	43.97	31.01	36.4	29.73	27.34	63.7	20.87	76.63	34.98	46.56	41.6
AP1G2	85.6	76.31	37.4	35.26	99.09	69.26	45.24	76.67	57.7	42.11	54.9	44.33	81.43	24.71	44.88	34.6	70.44	66.54	89.35	64.64	66.59	59.89	47.43	36.82	47.35	26.12	65.54	47.03	33.56	73.4	50	38.44	97.09	51.47	77.84	54.83	39.11	38.38	67.93	50.76	68.29	54.41	93.26	90.96	43.98	33.25	56.6	71.26	93.07
AP1M1	22.77	56.52	31.45	66.5	51.87	39.78	44.3	43.85	35.97	71.22	42.67	19.16	23.1	31.73	34.61	45.22	42.51	42.58	42.38	61.57	34.75	37.35	54.04	32.88	52.97	40.3	32.32	30.79	36.94	36.7	32.5	39.51	33.91	130.03	64.46	46.92	66.27	81.8	63.24	40.43	40.25	26.53	32.24	39.82	64.73	33.16	53.16	100.05	30.66
AP1M2	144.76	174.15	84.77	5.33	137.74	115.34	86.91	116.38	116.97	84.75	141.08	105.6	135.36	61.98	103.19	84.26	154.37	87.42	68.24	130.22	216.43	86.63	212.1	142.89	157.14	132.85	268.52	103.67	136.39	116.89	139.38	148.2	207.01	300.66	138.27	66.09	239.03	69.92	155.96	36.56	155.31	150.9	157.46	218.23	113.24	118.91	110.84	154.54	197.01
AP1S1	206.8	109.86	57.85	201.43	87.39	54.04	37.78	54.83	54.69	45.84	85.4	54.36	67.83	46.98	46.88	47.41	64.07	50	111.19	92.35	147.99	66.59	98.33	149.23	137.61	152.56	209.31	44.75	94.36	87.33	65.6	95.47	85.31	156.13	115.18	112.41	94.43	84.76	105.19	142.09	100.44	66.09	131.66	84.77	73.91	69.86	126.28	85.52	189.72
AP1S2	9.09	8.09	21.4	9.77	8.14	13.91	14.37	13.95	10.21	45.43	16.26	7.17	18.37	24.68	35.68	22.15	6.41	8.42	4.99	16.69	9.5	12.38	8.23	12.81	8.22	11.12	2.5	10.67	6.93	6.53	11.35	5.82	10.43	9.45	20.82	11.61	18.74	25.74	19.45	17.19	7.18	7.66	13.76	8.86	26.83	8.25	24.25	18.76	6.04
AP1S3	8.93	18.98	20.04	17.44	15.47	50.59	21.5	11.5	10.09	10.31	10.56	12.84	16.95	12.1	12.51	13.61	19.59	10.06	11.41	12.77	6.49	8.23	5.69	7.66	23.89	4.45	11.43	7.52	4.43	9.38	7.65	8.55	6.37	4.29	37.82	9.89	10.77	3.89	15.86	31.55	13.05	6.24	8.47	6.82	3.93	7.75	11.6	11.03	29.11
AP2A1	50.1	94.87	59.81	121.83	94.41	41.03	44.26	67.8	45.03	77.43	59.15	27.91	45.07	65.97	43.87	46.89	80.78	79.81	74.67	109.15	84.66	110.46	101.74	63.24	86.22	59.81	72.52	46.65	53.92	52.96	48.42	69.75	136.84	101.28	89.59	122.84	109.89	102.75	126.43	141.28	193.98	63.91	83	97.07	152.39	245.32	102.3	132.36	95.16
AP2A2	30.03	29.24	48.02	52.49	60.25	31.63	23.97	28.54	36.81	58.76	28.28	26.94	32.97	27.28	31.92	42.44	33.94	30.9	43.6	43.22	43.37	36.8	33.75	33.32	23.37	47.9	58.15	27.64	34.16	34.06	29.06	35.29	35.85	30.75	22.23	62.03	41.35	49.66	51.86	47.03	33.18	36.97	36.51	52.8	62.08	76.68	51.95	46.51	49.5
AP2B1	137.6	118.82	179.48	171.38	191.09	188.54	160.54	131.54	194.57	195.39	190.65	154.49	189.64	199.99	142.07	195.76	157.87	69.04	61.23	152.83	111.17	97.23	102.5	84.41	220.7	105.21	176.14	67.34	47.22	116.16	64.8	66.72	130.88	79.05	154.69	132.37	115.75	80.34	184.88	268.96	143.08	86.58	69.01	257.12	151.61	156.59	99.14	213.18	296.98
AP2M1	251.79	501.49	235.66	502.98	423.14	298.46	442.73	341.5	375.47	460.34	319.73	196.19	247.75	320.63	432.94	306.23	360.54	423.57	364.87	456.92	420.18	304.15	204.05	266.99	356.34	869.23	456.22	232.76	244.94	353.7	242.73	251.52	270.69	348.5	579.25	479.23	404.61	399.76	490.55	433.32	241.67	437.87	281.83	404.47	482.74	314.81	304.06	289.58	297.09
AP2S1	118.03	233.75	173.4	286.58	163.64	96.43	90.06	142.54	110.93	120.92	144.7	110.55	97.93	176.59	75.68	107.64	151.92	197.61	195.02	298.74	195.43	254.5	261.32	236.44	287.05	208.4	159.97	142.35	170.85	114.01	152.72	217.42	375.1	243.54	211.43	185.71	253.33	236	202.48	143.38	238.23	389.76	138.88	135.94	304.34	230.43	307.39	168.27	188.27
AP3B1	43.03	32.46	40.81	31.01	43.02	54.77	51.6	52.45	38.8	50.33	64.32	27.21	51.26	44.87	45.19	33.21	43.02	40.18	11.61	28.05	36.21	31.71	20.73	27.16	24.26	21.68	38.26	25.77	21.2	17.56	25.89	24.87	26.13	30.2	47.02	47.56	33.23	27.21	43.04	37.68	29.98	18.65	24.7	43.31	37.39	37.89	31.62	44.34	40.1
AP3B2	0.03	0.06	0.23	0.19	0.09	0	2.36	0.09	2.25	0.27	0.03	0.05	0.08	0.74	0.27	0.41	0.46	0.61	0.08	1.43	0.04	0.11	2.2	3.78	0.03	0.26	0.02	0.32	0.63	2.42	0.31	0.2	0	0.25	1.84	0.38	1.73	0.45	0.21	0.04	0.1	0.49	0.07	0.16	20.89	0.63	0.04	2.98	0
AP3D1	63.79	84.85	57.39	71.52	54.99	71.53	125.13	88.46	53.37	71.96	85.65	67.88	61.78	65.85	63.88	72.21	144.55	87.38	70.52	94.17	73.42	100.55	103.79	66.38	86.57	86.47	89.84	78.5	57.02	69.75	60.24	77.76	53.23	69.07	156.62	101.1	152.76	80.12	109.5	75.99	110.46	99.23	145.24	71.82	73.87	140.16	108.54	128.17	89.49
AP3M1	30.27	27.8	53.6	39.75	39.67	46.93	57.1	95.36	71.9	45.5	46.61	36.03	56.78	39.93	62.86	68.71	29.14	33.26	11.29	24.15	24.83	26.23	24.61	34.58	21.96	59.66	26.42	19.27	16.31	39.25	19.74	16.9	26.1	25.88	37.71	59.38	29.76	22.62	34.54	42.08	33.99	18.6	127.57	44.25	33.79	59.24	36.31	45.01	47.19
AP3M2	15.18	6.08	7.94	14.73	18.72	23.64	19.14	15.99	18.54	15.73	12.22	33.36	16.91	10.01	16.73	23.62	6.33	7.25	3.52	6.84	4.87	15.06	6.89	12.22	25.16	36.59	12.55	3.71	2.54	5.55	3.37	3.14	8.03	5.25	9.29	8.82	7.25	6.96	8.49	14.63	5.92	7.87	10.7	10.67	12.82	37.46	10.86	9.93	29.24
AP3S1	84.58	99.55	142.71	196.9	82.56	211.57	58.91	156.7	72.1	118.46	170.06	87.33	118.15	171.92	104.14	117.75	67.24	77.47	29.08	87.76	61.2	84.38	62.08	131.91	114.37	65.93	86.82	47.57	116.59	82.74	59.84	83.25	63.5	62.04	412.7	71.63	85.03	73.34	93.63	124.99	57.35	21.88	94	72.49	60.12	63.76	47.61	87.95	69.95
AP3S2	15.16	6.82	20.39	19.73	5.99	15.79	24.42	44.39	16.79	17.54	22.71	17.93	22.65	22.84	25.13	16.49	10.9	10.64	3.54	14	4.51	12.84	5.37	6.25	6.62	10.76	13.75	7.17	5.15	26	4.8	9.59	5.66	8.44	5.4	10.26	9.91	4.45	13.15	13.29	3.88	6.02	15.03	29.2	8.18	20.89	12.9	7.24	14.14
AP4B1	19.27	11.6	10.82	22.53	15.02	12.11	10.56	18.9	13.09	16.81	14.36	11.02	23.33	9.05	17.05	15.58	16.64	13.04	11.04	10.62	14.81	12.63	9.91	11.44	3.88	12.32	17.71	9.49	4.53	14.01	8.64	7.96	14.09	18.44	12.53	12.87	9.23	9.08	15.15	16.18	10.58	8.87	17.58	21.67	7.39	23.05	9.36	11.77	21.05
AP4B1-AS1	0.99	1.48	3.42	2.23	1.97	3.53	2.87	2.25	1.67	1.51	1.34	4.03	3.03	1.27	1.95	3.5	1.63	1.06	0.82	1.03	0.56	0.44	1.06	0.16	0.48	1.03	1.05	1.39	0.9	0.96	0.78	1.05	0.64	0.73	0.97	0.84	0.71	0.82	1.19	0.61	1.72	0.79	2.62	1.44	0.34	1.79	2.14	2.52	2.5
AP4E1	4.57	2.67	5.76	6.61	4.41	6.88	5.97	5.51	5.64	6.92	5.24	6.61	6.11	5.23	7.25	6.82	4.64	6.92	1.96	1.75	2.69	3.98	4.25	3.07	2.34	4.41	3	2.95	1.89	3	2.28	1.66	2.5	2.83	2.46	2.04	3.81	2.67	5.82	2.6	6.04	2.37	3.97	8.58	3.62	7.27	4.27	8.53	7.35
AP4M1	15.9	14.24	12.27	16.79	28.85	8.14	25.32	12.88	8.61	13.97	13.05	9.96	27.66	8.02	11.91	14.02	14.46	13.16	27.04	17.64	22.91	16.64	13.7	7.51	14.59	35.36	42.27	12.9	10.41	11.55	12.87	9.82	15.51	26.19	37.71	31.06	42	20.76	19.3	33.71	41.66	11.71	44.27	23.26	18.18	21.09	11.82	16.32	16.63
AP4S1	3.42	1.98	3.01	3.08	3.59	3.81	4.47	6.55	5.1	4.69	3.54	3.77	4.65	3.88	4.57	3.35	3.07	4.72	2.77	3.45	3.95	2.73	3.93	3.14	4.04	2.94	1.47	2.93	1.43	2.93	3.9	1.89	3.21	1.81	1.5	4.07	2.64	3.69	3.94	4.79	1.47	2.5	1.49	3.87	3.59	2.57	5.41	6.29	3.84
AP5B1	8.87	12.45	7.43	7.95	20.79	9.03	8.39	11.51	10.7	13.95	11.6	10.54	13.19	9.75	11.61	10.47	11.41	20.52	12.85	12.34	13.74	30.84	7.52	9.19	19.32	17.35	10.68	9.21	11.09	12.51	8.61	11.88	10.5	10.85	21.4	40.07	13.18	16.52	18.66	13.34	15.2	11.55	25.08	13.21	23.3	22.34	21.57	17.73	10.74
AP5M1	37.85	17.93	25.39	26.57	41.43	31.48	65.27	50.87	55.28	35.88	61.1	48.01	53.54	31.73	43.79	27.98	27.96	29.75	14.12	14.28	37.92	23.62	21.36	20.01	12.43	16.97	34.51	17.38	33.39	24.12	19.71	21.14	24.03	25.73	14.13	17.58	20.68	18.77	33.21	14.36	23.82	20.07	37.1	50.85	25.56	47.02	21.67	31.89	25.33
AP5S1	17.03	13.77	18.37	15.33	28.28	7.74	30.1	9.57	14.81	11.66	9.38	19.23	11.15	10.09	15.12	11.34	16.92	22.4	40.32	16.73	22.05	13.66	20.46	14.86	14.69	11.16	37.2	14.56	17.01	22.53	15.63	21.93	20.62	28.97	6.14	18.41	21.17	17.73	16.46	18.58	13.18	22.65	30.54	11.55	23.96	21.98	34.06	18.38	24.7
AP5Z1	16.32	18.91	16.15	14.26	25.17	5.88	5.73	11.21	9.24	11.34	6.44	8.97	13.6	10.62	12.22	8.11	12.71	10.18	35.81	11.98	13.33	14.4	10.09	5.38	20.99	10.48	16.11	10.51	8.2	11.25	9.46	16.22	11.06	18.24	10.5	29.09	19.73	21.49	17.88	12.72	15.6	12.01	40.46	19.08	16.46	27.06	17.77	12.8	8
APAF1	13.25	4.46	21	16.37	14.76	11.21	5.18	19.55	13.62	16.69	21.89	22.48	18.3	6.02	17.2	12.85	8.18	6.05	6.21	5.4	7.35	6.92	5.66	9.63	4.06	3.8	9.04	5.95	5.96	10.32	5.42	7.59	9.45	8.65	5.83	9.93	9.44	5.19	11.97	8.78	21.32	10.29	6.91	18.3	8.46	20.3	11.39	14.26	16.23
APBA1	0.69	0.73	2.69	3.43	2.13	0.36	1.48	4.31	2.28	4.28	1.17	11.78	2.48	2.81	2.39	1.27	2.2	2.32	1.02	3.04	1.66	0.55	1.68	0.75	0.65	1.18	0.96	1.69	1.11	2.16	0.84	1.09	1.18	2.77	2.06	3	2.95	2.75	3.75	1.29	1.11	2.07	0.57	2.15	2.56	2.09	2.08	3.19	0.83
APBA2	0.88	4.23	0.86	0.76	5.68	1.57	2.38	6.48	3.75	8.04	2.45	1.03	0.56	8.47	1.99	5.66	1.89	2.28	2.1	8.28	3.22	2.39	3.83	1.59	3.73	0.64	0.81	2.41	1.05	1.69	2.71	2.08	2.41	4.23	1.4	3.97	4.26	9.83	10.6	3.58	6.99	1.46	1.31	4.17	4.89	2.9	4.69	19.39	1.19
APBA3	7.83	35.24	10.68	8.81	32.29	9.37	10.29	15.32	9.47	15.4	7.99	7.68	9.84	8.11	8.8	14.16	23.71	18.71	17.68	26.11	18.79	23.22	47.21	17.78	25.98	20.74	30.91	18.62	12.85	13.14	20.62	20.47	20.1	18.52	42.16	23.61	36.35	35.85	26.92	20.47	18.34	24.03	28.37	10.77	16.5	23.93	24.1	23.69	12.89
APBB1	0.96	6.11	4.82	4.36	6.49	1.1	4.81	4.48	9.72	14.77	2.67	4.1	2.01	11.74	9.89	3.61	8.19	10.41	4.64	23.38	6.55	8.17	9.63	11.46	3.72	13.81	1.83	10.34	6.23	14.27	10.35	6.25	3.73	9.38	7.51	11.95	13.31	24.04	18.35	5.77	4.18	15.17	4.23	7.58	67.84	18.84	7.05	23.29	1.58
APBB1IP	7.75	13.44	15.78	7.8	20.49	4.91	7.94	16.97	15.15	42.68	21.8	5.91	11.84	8.45	37.04	30.11	17.39	13.69	139.58	27.16	14.34	25.45	21.89	13.2	7.57	1.71	1.95	35.24	6.82	24.04	22.47	21.28	21.2	14.03	5.77	57.71	52.38	58.1	18.71	53.09	64.18	10.87	1.8	8.24	32.02	8.92	41.96	43.94	5.84
APBB2	8.35	7.61	10.67	5.94	11.69	22.71	61.16	9.05	14.13	19.97	12.39	8.94	8.79	22.49	54.75	20.72	11.85	5.88	14.87	10.37	7.9	11.38	6.4	6.93	12.81	6.64	5.33	3.99	6.88	6.62	5.98	6.66	5.96	14.34	5.81	10.14	9.53	7	13.92	7.23	5.86	10.66	7.78	15.5	11.53	8.83	15.8	21.78	6.73
APBB3	2.35	6.54	4	4.37	7.7	7.93	10.55	5.69	15.37	6.8	3.42	4.43	7.27	8.38	7.67	5.99	4.58	5.32	6.03	3.63	2.86	3.74	8.15	4.99	4.93	7.3	4.8	4.5	2.12	5.92	4.06	3.94	5.01	7.12	8.73	3.26	2.67	5.45	5.61	5.97	4.14	3.86	8.37	4.42	6.46	5.95	7.89	5.79	5.18
APC	1.37	5.7	10.71	7.68	9.15	13.56	8	12.95	12.19	18.08	15.34	7.17	17.09	16.03	17.09	7.73	6.77	9.7	1.86	5.63	5.42	7.16	7.67	5.07	2.68	1.16	7.92	4.78	7.14	8.58	4.49	4.84	5.17	6.72	9.71	5.59	5.6	5.28	10.86	4.89	9.43	1.82	4.71	8.2	6.31	7.86	5.02	14.99	10.32
APC2	0.02	0.13	0.04	0.13	0.46	0.56	0.06	0.23	0.17	0.22	0.14	0.1	0.15	0.1	0.11	0.02	0.21	0.11	0.13	0.21	0.14	0.31	0.79	0.24	0.17	0.29	0.29	0.48	0.17	0.09	0.39	0.07	0.11	0.13	0.49	0.14	0.13	0.32	0.21	0.05	0.3	0.15	0.64	0.12	0.17	0.91	0.57	0.25	0.52
APCDD1	300.07	16.16	3.17	3.28	24.84	9.36	1385.67	6.15	51.52	46.18	8.62	6.06	4.4	38.04	39.41	201.51	11.12	39.45	261.24	37.09	8.17	4.94	6.93	14.7	7.96	694.56	5.41	14.99	10.92	5.77	21.13	8.04	9.82	18.21	14.85	63.36	21.38	40.55	34.36	2.75	4.77	13.88	61.67	19.97	30.46	297.75	8.64	41.27	4.03
APCDD1L	0.19	1.47	0.1	0.49	0.56	0.53	0.59	0.44	0.43	1.88	0.33	0.21	0.44	0.72	1.75	0.68	0.21	0.25	1	2.56	0.51	0.59	0.2	0.51	2.12	0.07	0.17	0.48	1.82	0.07	0.47	0	0.04	0.74	0.37	0.24	2.33	1.93	3.74	1.33	0.15	0.55	0.32	0.65	2.08	0.25	1.01	0.8	0.22
APCDD1L-AS1	0	0.26	0.48	0.05	0.05	0	0.33	0.05	0.03	0	0.05	0.26	0.08	0.02	0.29	0.24	0.26	0.03	0	0	0.02	0.1	0	0.3	6.25	0	0.06	0	0.08	0	0.07	0	0	0.3	0	0.09	0.2	0.3	0.03	0.24	0.03	0.06	0.06	0.04	0.04	0.03	0.1	0.19	0
APCS	0	0	0	0	0	0	0	0	0	0	0	0	0	0.47	0	0	0	0	0	0	0	0	0	0	0	0	0	0	0	0	0	0	0	0	0	0	9.85	0	0	0	0	0	0	0	0	0	0	0	0
APEH	80.91	81.25	53.85	79.13	136.49	49.2	95.64	50.3	76.86	59.26	58.7	40.17	67.31	61.28	47.31	36.12	108.4	70.46	86.56	52.65	142.71	98.19	57.22	100.37	81.11	57.62	183.61	68.78	63.75	131.47	64.25	78.92	88.57	43.85	35.65	77.97	70.89	94.52	106.57	64.56	117.53	120.07	111.49	133.79	79.8	89.39	63.54	129.02	139.8
APELA	0.23	0.06	0.09	0.09	0.37	0.76	0.57	0.28	0.55	3.06	0.24	0.08	0.04	3.04	1.66	0.19	0	0.11	0	0.67	0.19	0.16	0	0.07	0.06	0.16	0.16	0	0.06	0	0.06	0	0	0.11	0	1.32	0.02	0.13	0.71	0.15	0.14	0.13	0.05	0.29	0.6	0.95	0.02	1.4	0.29
APEX1	387.57	195	224.88	304.69	295.39	315.35	370.88	263.35	530.4	199.55	255.25	392.77	356.73	294.65	256.53	218.74	179.37	168.14	592.87	232.42	354.67	247.48	252.3	193.63	276.02	219.44	311.11	138.72	149.74	220.3	174.01	132.08	215.23	343.81	181.66	247.65	166.34	252.75	235.96	373.55	293.53	236.94	355.79	226.7	159.78	127.59	189.8	304.2	222.01
APEX2	65.62	55.13	42.21	50.51	51.13	33.95	41.8	43.48	23.75	36.85	41.21	47.14	36.77	35.52	28.04	35.04	50.98	44.13	47.94	48.48	57.79	103.31	36.82	37.35	59.83	51.76	65.93	28.18	28.57	55.17	31.2	41.59	41.24	64.56	47.16	73.99	83.32	69.76	52.72	62.24	42.87	45.27	113.98	30.65	47.95	36.59	43.58	68.4	90.46
APH1A	186.1	208.56	118.08	125.29	226.58	130.82	184.37	333.42	162.9	160.62	143.25	125.47	180.02	240.73	171.09	141.16	150.3	188.41	285.25	226.67	244.06	180.89	137.72	146.69	223.24	319.15	248.39	123.47	117.59	212.66	167.85	191.06	168.33	217.56	207.94	240.95	325.14	181.17	200.26	228.99	135.4	306.03	156.56	155.44	159.99	311.25	242.61	197.33	103.97
APH1B	7.51	4.36	10.26	3.18	2.85	3.06	3.73	9.97	14.06	10.43	5.71	10.29	7.13	5.21	12.22	5.27	3.31	3.02	4.74	8.09	2.69	4.44	2.41	6.33	2.88	17.43	1.02	4.47	2.77	6.15	5.08	2.68	3.05	3.2	3.67	3.14	5.17	6.7	7.02	5.69	3.45	4.27	0.85	4.5	15.84	11.7	6.27	11.79	0.64
API5	122.86	28.36	135.92	92.45	83.59	94.9	101.26	77.78	70.34	77.02	120.7	106.9	99.94	77.71	94.25	74.84	55.09	88.01	31.61	42.82	70.21	69	45.31	76.77	35.89	126.91	64.4	33.69	35.36	48.71	36.02	33.42	34.89	43.75	38.55	61.14	49.88	39.43	73.05	56.48	67.49	43.87	73.41	101.18	54.91	122.19	60.27	89.58	71.65
APIP	103.49	22.42	65.54	87.34	28.08	68.79	33.94	67.54	46.95	55.7	56.75	88.25	57.01	74.47	65.74	39.33	31.92	14.92	37.06	29.77	28.74	23.09	44.63	22.62	16.89	38.11	24.93	23.88	19.06	43.54	35.8	26.14	29.23	35.1	27.28	49.15	27.81	22.47	23.45	40.39	35.57	18.77	31.65	35.25	29.28	70.62	30	26.69	22.12
APITD1	27.3	14.63	11.17	18.39	14.92	11.73	35.73	21.91	18.03	11.04	16.92	28.97	16.94	42.16	39.35	29.57	10.37	9.73	15.13	13.07	21.76	17.19	13.43	11.26	8.95	48.14	18.99	6.98	12.25	46.08	12.62	14.65	11.63	26.18	7.36	29.54	15.97	8.78	11.4	25.63	21.73	16.14	30.66	36.42	14.23	15.35	14.43	14.12	17.47
APITD1-CORT	0.27	2.25	0.75	1.04	2.35	2.1	1.23	1.9	0.53	0.64	1.15	1.8	2.27	4.43	1.24	2.12	3.71	1.32	2.72	1.96	3.43	2.89	6.13	3.45	3.84	18.02	5.64	1.25	3.06	4.08	2.2	1.93	1.95	5.39	1.87	2.87	2.36	2.16	2.83	2.16	0.8	1.83	5.65	7.98	3.05	1.3	0.84	1.2	1.7
APLF	0.69	0.69	0.7	0.31	1.07	4.31	2.37	1.36	1.1	2.96	0.65	1.95	2.42	1.93	1.64	4.11	0.8	2.98	0.39	1.19	0.33	1.04	2.1	1.41	0.91	0.97	1.28	0.43	0.64	0.95	1.17	0.57	0.47	1.39	3.37	0.67	0.57	1.46	2.18	2.28	0.36	1.26	1.67	0.74	0.8	1.17	0.91	1.56	0.6
APLN	11.93	2.47	4.73	2.5	25.36	3.58	25.3	11.27	3.44	7.88	3.97	13.37	11.58	12.33	0.94	2.39	1.13	2.2	5.22	12.43	15.16	2.42	6.79	4.55	9.86	6.65	1.15	0.37	0.05	3.01	0.29	7.15	3.34	10.34	0.74	0.97	2.45	2.56	19.58	2.2	12.76	6.34	10.15	9.19	7.65	12.8	1.44	8.4	9.23
APLNR	9.45	15.56	1.81	16.07	15.34	7.2	32.4	33.48	9.52	71.79	19.54	6.67	32.47	31.23	47.63	19.62	22.02	31.41	18	142.89	39.26	14.72	23.85	10.73	12.14	9.91	17.32	13.44	13.54	18.32	25.76	25.34	7.08	67.01	11.96	21.56	51.7	89.69	185.68	8.42	8.69	59.37	8.11	10.75	89.49	9.02	22.38	37.01	9.36
APLP1	0.48	8.66	0.43	1.99	7.02	0.96	2.15	0.53	35.47	4.97	0.65	0.41	1.1	1.75	11	0.72	31.56	2.55	29.95	9.06	1.42	4.41	1.46	11.71	0.74	20.29	1.53	38.41	2.53	7.08	28.89	3.99	0.54	3.41	25.61	56.23	27.47	4.28	6.22	4.27	0.88	10	0.65	1.47	201	12.63	1.67	2.71	0.29
APLP2	177.94	113.15	360.44	511.5	481.44	265.56	212.81	307.07	251.19	427.74	371.13	340.08	209.72	416.13	273.84	256.17	202.68	244.13	126.3	298.08	263.27	191.53	117.4	162.37	173.16	418.47	246.37	129.81	260.99	251.12	135.21	191.38	147.63	142.67	512.71	202.41	262.45	179.84	332.51	587.13	294.01	579.32	313.63	293.92	297.54	446.07	331.27	432.32	360.53
APMAP	211.72	96.04	193.16	177.35	153.74	79.68	155.75	160.81	79.86	140.45	67.28	165.3	129.36	125.31	153.71	77.04	72.62	50.36	135.92	117.48	88.58	92.95	94.31	63.25	90.76	242.21	139.05	41.4	37.56	131.77	50.82	56.14	69.8	89.73	78.98	88.02	149.23	88.43	113.61	202.05	156.36	91.34	251.94	99.46	117	202.59	223.07	106.69	138.09
APOA1	0	1.23	7.58	45.17	0.99	0	11.44	1.01	32.71	3.22	0.86	0.43	0.89	27.01	15.29	2.68	3.73	0.29	22.86	0.88	2.03	0.34	2.71	0.22	0.39	0.5	0.96	10.12	5311.65	120.97	5.67	27.4	8.55	7.92	0	62.51	8.81	13.88	1.59	0.28	15.92	171.79	0.98	11.94	78.33	0.99	14.11	42.03	0.14
APOA1-AS	0.36	0	0.7	0.46	0.23	0.44	0	0.13	0.27	0.56	0.11	0	0.41	0.47	0.79	0.45	0.19	0.51	0	0.17	0.12	0	0	0	0	0	0	0	0.36	0	0	0	0.16	0.37	0	0.26	0.22	0.15	0.67	0.24	0.26	0.25	0	0	1.31	0	0.5	0.53	0.13
APOA1BP	250.9	252.12	113.53	177.38	234.04	140.8	187.27	111.83	273.88	88.12	143.58	168.6	188.14	139.03	178.86	146.61	150.06	116.48	399.99	194.19	195.83	217.79	162.83	150.11	230.27	390.46	171.78	163.59	128.32	233.03	207.37	181.88	145.48	239.25	247.85	283.18	233.49	172.73	118.09	207.68	377.25	435.53	340.49	141.11	467.48	211.06	282.93	135.36	99.68
APOA2	9.32	0	74.93	0.15	0.15	0.38	0.23	1.19	1.39	0.18	1.48	0	0	0	0	0	0.24	0.16	31.4	0.22	1.27	0	0	0	0	1.1	0.32	0	0.88	0.16	0	0	0.6	12.51	0	0.16	7.6	0.73	0.33	0	76.4	0.79	1.79	0.67	6.81	0.83	0.32	11.1	7.07
APOA4	0	0	6.36	51.1	0.15	0.09	0	0.53	34.43	3.39	0.14	0.14	0.5	19.65	0.76	6.78	5.62	0	0	0.28	4.35	0.1	0	0	0	0	0	8.62	7555.06	7.29	2.54	10.65	0	22.17	0	0.25	0.62	1.82	0.09	0	1.23	4.44	0.09	6.41	0.19	0.31	0	23.61	0.04
APOA5	0.11	0	0.03	0.03	0	0	0.12	0.63	0.92	0	0.03	0	0.12	0.05	0.32	0.03	0	0	0.93	0	0	0	0.04	0	0.06	0	0	0	0.18	0.27	0.12	0.39	0.04	0	0	0.03	0	0.11	0	0	0.72	5.52	0.35	0.09	0	0.1	0.03	0.03	0.03
APOB	0.02	0.01	1.37	0.53	0.57	0.01	0.06	14.74	5.53	1.54	14.38	0.14	0.02	6.74	0.14	4.63	1.31	0	32.55	0.26	3.99	0.05	0.01	0.47	0.05	0	0	0.62	584.93	0.27	0.29	5.79	0.01	6	0.31	0.03	1.46	0.28	0.02	0.04	0.18	0.07	1.15	9.16	2.57	0.16	0.02	37.57	0.01
APOBEC1	18.05	1.75	11.76	3.02	0.4	0.32	0.7	21.23	2.58	3.22	23.34	2.18	15.65	1.4	6.53	7.04	30.61	0.15	3.32	16.83	32.55	0	5.49	0.23	1.21	0	0.38	37.75	223.93	2.55	14.73	46.43	1.94	14.76	9.28	0	3.89	9.66	2.65	12.09	21.15	3.24	8.13	14.9	0	1.18	0	5.48	10.34
APOBEC2	0.13	1.4	0.86	0.4	0.27	0.12	0.33	0.68	0.51	0.57	0.45	0.93	0.54	0.35	3.19	0.52	11.07	0.58	0.46	0.9	0.59	0.17	0.43	0.06	0.27	0.1	0.08	19.5	1.56	11.74	13.75	1.26	0.32	0.47	0.17	0.3	2.74	0.39	0.15	0.04	0.86	27.92	0.54	2.51	0.44	0.62	2.96	0.36	0.27
APOBEC3A	5.72	4.36	3.28	3.66	7.55	8.27	2.13	4.4	2.38	17.05	3.3	4.44	5.31	5.48	2.09	9.01	1.38	115.6	7.32	6.5	15.97	5.37	3.47	6.6	3.55	2.5	1.4	1.26	2.31	3.12	2.23	1.74	3.13	6.48	0.87	2.95	3.38	4.96	11.73	1.48	4.22	2.93	3.77	3.96	5.28	6.6	2.14	4.67	1.92
APOBEC3A_B	0	0	0	0	0	0	0	0	0	0	0	0	0	0.36	0	8.62	0	1.84	0	0	0	0	0	0	0	0	0	0	0	0	0	0	0	0	0	0	0	0	0.73	0	0	0	0	0	0	0	0	0	0
APOBEC3B	61.11	6.25	24.19	8.55	45.87	4.25	8.02	25.38	16.31	10.6	24.49	17.84	33.2	37.69	32.99	10.15	16.45	15.67	84.53	38.98	32.33	18.24	16.73	18.86	0.9	10.68	44	7.01	9.72	19.91	7.16	0.13	34.01	30.16	5.63	54.54	16.38	21.35	20.01	64.81	36.93	39.48	73.21	47.18	50.42	9.88	20.87	26.16	19
APOBEC3B-AS1	0.13	0	0	0.09	0.58	0	0	0	0	0.42	0.09	0	0.26	0.09	0.19	0	0	0.1	0.22	0	0	0	0	0.33	0	0	0.11	0	0	0.1	0	0	0	0	0	0	0.46	0	0.33	0.21	0.65	0	0.62	0.15	0.31	0.11	0.38	0.2	0.1
APOBEC3C	26.84	38.97	55.38	14.1	32.31	13.29	24.4	32.21	44.28	66.41	22.57	10.75	65.05	20.55	56.63	66.85	53.04	89.92	118.4	119.27	87.5	198.47	66.09	99.48	40.56	18.19	8.83	102.6	39.22	49.74	96.61	79.25	64.88	43.46	43.86	27.24	67.38	137.54	70.28	84.16	20.65	21.72	72.77	77.03	56.32	18.6	83.14	72.69	76.62
APOBEC3D	1.12	3.68	7.72	1.94	6.65	3.16	3.36	4.58	4.08	4.39	1.8	3.66	3.94	1.43	5.87	8.11	5.87	5.19	11.75	7.65	7.83	16.04	8.87	12.85	2.19	1.32	1.14	15.98	3.3	8.19	13.2	7.6	6.91	5.9	5.78	5.68	9.93	11.64	5.49	12.83	5.17	8.37	4	8.78	7.7	3.89	10.71	11.69	3.7
APOBEC3F	2.22	6.41	4.96	1.21	5.87	2.32	4.81	3.24	5.29	5.18	3.98	2.75	3.61	1.79	4.74	11.71	4.55	7.01	9.6	7.56	5.34	20.96	8.33	9.72	2.36	4.59	0.97	12.01	4.17	5.67	9.32	4.78	8.56	4.57	6.64	13.89	8.71	9.49	6.59	8.83	4.66	3.85	6.62	8.85	7.98	9.66	14.26	8.14	3.85
APOBEC3G	3.98	17.54	19.21	5.5	16.06	7.43	3.71	9.07	12	15.59	13	3.1	6.38	4.96	21.04	30.21	15.52	21.53	27.3	16.41	11.99	126.12	37.4	37.43	8.19	5.94	1.84	34.34	8.19	22.83	36.7	24.92	35.13	20.8	10.65	26.84	22.54	61	12.93	25.9	3.7	10.59	7.03	14.28	13.09	9.7	45.71	23.96	4.78
APOBEC3H	0.68	1.55	2.46	0.51	1.49	1.2	1.84	0.88	1.17	1.77	1.57	0.9	0.39	0.62	2.24	4.03	1.05	1.45	3.04	1.78	1.6	8.99	4.15	2.08	0.68	0.66	0.18	2.15	1.21	1.43	1.79	3.28	3.74	1.78	0.63	0.44	2.39	7.11	1.12	0.33	0.33	0.86	0.13	0.84	1.44	0.5	6.72	0.87	1.45
APOBEC4	0.07	0.06	0.06	0.07	0.06	0	0.13	0.79	0.02	0.3	0.07	0.69	1.2	0	0.45	0.63	0.1	0.06	0	0.03	0.3	0	0.09	0	0.1	0.03	0.02	0	0	0.23	0	0.23	0.11	0.31	0	0.15	0.02	0	0.15	0.04	0.17	0	0.07	0.87	0.9	0.02	0.04	0.04	0.14
APOBR	6.48	8.28	4.78	4.02	7.59	1.93	0.72	9.39	1.3	14.58	10.89	1.2	3.19	3.1	5.84	4.65	4.37	5.72	9.93	7.41	15.11	15.15	15.92	4.17	5.37	0.91	2.5	6.21	5.07	6.41	6.58	16.89	5.99	8.22	6.41	5.47	10.88	18.97	18.02	4.94	4.93	4.49	2.83	6.55	24.72	5.75	28.78	21.97	3.09
APOC1	10.85	688.35	384.7	123.94	134.36	75.05	22.88	111.82	129.64	339.54	504.19	15.84	236.36	42.22	288.98	523.89	84.99	76.16	232.1	224.9	79.52	445.7	446.14	356.79	204.31	77.52	32.02	114.65	34.27	104.61	105.34	535.91	1118.99	348.06	266.97	307.9	833.29	846.73	228.26	158.9	149.05	44.46	22.28	111.76	222.57	103.09	1150.23	201.78	37.56
APOC1P1	0	2.47	1.07	0.75	0.89	1.59	0.73	0.45	0.55	0.71	1.21	1.21	0.28	0.1	0.44	0.93	0.86	1.14	1.26	1.04	0.33	2.44	3.03	1.13	0.56	0.61	0.33	0.87	0	0.51	0.51	3.66	4.22	2.94	1.39	0.96	4.42	2.98	1.4	0.48	0.55	0.22	0.37	1.39	1.05	0.34	2.63	0.92	0.65
APOC2	22.16	127.83	50.13	54.58	5.03	16.54	7.98	161.87	6.72	13.21	149.23	2.94	37.47	29.21	36.11	63.45	5.65	8.8	59.33	32.1	35.97	88.52	29.95	122.18	9.64	8.4	6.74	27.84	153.88	19.32	20.98	138.95	157.53	93	9	9.08	249.22	191.73	60.13	21.39	83.72	4.86	10.1	34.47	87.71	6.81	260.22	99.46	4.59
APOC3	0.13	0	4.27	6.9	0.25	0	0.19	4.13	7.58	0.45	0.62	0	1.2	10.44	6.15	5.57	0.82	0	0.71	0	0.6	0	0	0	0	0	0	3.74	3975.42	14.07	1.04	11.96	0	5.75	0.16	1.51	0	3.44	0.14	0.13	2.46	17.65	0	1.15	116.93	0.14	0	3.68	0
APOC4	0	0.15	0	0	0	0.04	0	0	0	0.09	0	0	0.48	0.03	0.15	0	0.34	0.11	0.26	0	0	0.39	0	0	0.11	0	0	0	0	0	0	0.22	0.07	0.45	0	0.11	0	0.29	0	0	0	0	0	0.16	0.03	0	0	0	0
APOC4-APOC2	0.04	0	0.4	0.38	0.05	0.09	0	0.24	0.05	0.27	0.53	0	0	0.07	0.08	0.37	0	0	0.1	0.07	0.09	0	0	0.39	0.09	0	0	0	0.15	0	0	0.18	0.36	0.09	0	0	1.12	0.23	0	0	0.1	0	0.06	0	0.14	0.05	0.65	0.34	0.14
APOD	159.66	55.32	176.47	31.98	29.97	4.99	9.65	43.47	56.69	850.09	16.83	188.86	3.83	236.54	808.45	57.88	59.15	93.55	189.27	755.53	356.59	32.38	21.51	69.84	16.82	55.27	17.63	52.24	37.2	205.7	75.09	31.7	7.07	41.05	54	1060.56	54.38	392.88	37.72	11.62	576.93	51.17	0.86	376.31	251.75	19.03	17.92	177.95	3.18
APOE	5.93	1126.51	303.77	128.38	227.72	28.77	99.84	163.16	160.39	628.47	369.31	14.03	150.98	66.7	412.52	375.78	186.76	203.82	1092.43	366.03	339.89	925.34	313.67	380.41	373.86	78.34	45.42	243.85	101.2	196.65	306.78	721.27	1371.16	563.96	458.76	2023.55	1645.46	1820.66	560.24	399.76	127.22	67.22	47.17	134.62	335.23	127.25	1516.35	400.13	41.36
APOF	0.06	0	0.1	0	0.06	0.11	0.1	0.27	0.1	0	0	0.36	0	0	0	0.08	0.05	0	0	0.08	0.03	0	0	0.05	0.13	0.19	0	0	0	0.04	0	0	0	0	0	0	0	0	0	0	0.07	0.07	0.12	0	0	0.41	0.1	0.2	0.23
APOH	0.09	0	0.37	0.87	0.52	0.11	53.02	0.7	8.43	0	0.51	2.61	0.1	0.8	0.54	0.39	0.31	0	40.63	0.35	0.22	0.36	0.67	0.86	0.05	0	0	2.06	1.01	11.55	0.39	0	1.48	1.35	0.06	3.78	0.63	0.12	0.05	0.2	1.4	2.34	0.54	0.22	19.17	42.07	12.89	8.92	11.82
APOL1	69.38	285.01	112.73	301.98	94.48	118.61	16.06	36.81	29.17	78.46	70.32	100.26	77.28	281.68	69.41	263.23	67.81	74.81	139.05	108.5	44.03	442.16	102.86	393.51	196.36	29.64	152.28	215.49	32.1	116.3	148.35	408.52	331.42	47.24	61.56	81.93	71.47	76.56	87.42	988.93	30.18	27.92	77.89	99.44	65.18	87.86	128.77	140.4	85.2
APOL2	41.44	62.98	31.44	59.44	32.76	38.72	21.93	26.03	15.71	40.97	53.31	27.26	42.9	77.83	34.57	79.7	35.59	25.05	42.52	41.07	25.64	170.55	41.52	115.4	56.34	17.55	48.78	45.75	27.47	25.07	45.45	89.32	66.24	24.44	23.87	53.45	34.27	44.49	50.98	247.68	20.2	17.53	47.8	29.74	28.01	16.25	54.65	46.37	35.79
APOL3	9.53	61.58	31.32	10.49	17.76	6.73	5.66	20.38	11.05	37.34	21.48	8.75	34.03	11.29	28.16	50.59	18.58	33.07	17.8	33.16	32.38	141.05	37.82	90.71	25.07	8	12.26	34.72	16.18	24.76	35.42	42.15	48.9	32.88	6.27	18.85	40.07	68.53	32.27	20.03	14.07	16.78	38.64	22.47	24.79	12.7	71.24	27.96	13.21
APOL4	18.92	5.86	15.28	9.81	14.74	7.01	6.61	17.39	7.3	20.47	9.07	16.33	38.1	7.53	21.55	12.43	3.28	5.12	4.36	10.53	6.91	28.53	9.67	17.47	6.62	9.93	4.08	5.42	2.96	12.35	6.74	7.13	44.66	12.96	3.66	17.28	12.94	20.54	19.29	7.5	16.72	3.98	8.25	24.51	8.48	53.64	20.4	16.72	7.29
APOL5	0	0	0.04	0	0.04	0	0.06	0.08	0	0.09	0	0	0.13	0.04	0	0	0.06	0	0	0.17	0	0.05	0	0	0.12	0.06	0	0	0	0.09	0	0	0	0	0	0.04	0	0	0.04	0	0.09	0	0	0.06	0.25	0	0	0	0
APOL6	89.81	27.55	45.09	25.3	22.53	19.37	6.48	32.88	13.5	31.81	55.21	20.94	48.67	18.85	25.42	69.69	22.16	33.63	23.69	24.41	34.47	81.8	24.07	53.44	20.43	4.72	28.84	29.1	33.78	21.15	23.67	33.22	52.94	23.67	13.55	27.97	23.01	27.3	29.77	60.18	26.04	12.41	40.92	59.28	26.92	38.79	59.03	48.69	48.13
APOLD1	15.15	4.55	3.63	5.51	6.08	6.24	16.27	8.86	11.77	23.06	6.54	14.19	9.62	21.93	23.2	21.97	3.03	12.02	25.11	24.2	12.03	5.47	12.57	3.01	4.01	16.08	3.3	2.6	4.53	6.2	7.09	9.87	2.04	12.6	3.01	7.66	11.57	6.59	18.04	4.45	5.47	7.36	9.02	10.27	8.96	4.94	14.79	13.12	5.29
APOM	3.84	8.64	9.16	4.07	4.6	6.57	5.06	8.62	5.58	4.14	13.83	4.96	7.72	2.44	9.46	7.35	7.53	3.99	5.66	5.75	12.6	9.97	3.57	1.71	5.68	10.04	24.38	6.04	21.76	40.86	10.21	5.24	6.53	7.85	1.78	4.03	13.86	8.62	8.28	1.81	4.77	10.14	35.24	22.78	18.96	1.2	3.94	21.14	7.24
APOO	54.57	15.34	13.8	31.83	24.36	18.99	41.97	20.91	23.5	11.13	26.04	41.13	38.55	37.17	34.99	59.47	22.92	16.09	22.42	16.91	19.32	44.23	25.35	33.24	16.1	33.09	25.13	25.63	15.5	24.22	19.99	21.79	20.87	33.17	34.44	17.43	21.41	24.91	14.21	28.64	24.29	89.46	40.24	13.34	74.34	41.62	22.3	18.73	43.01
APOOL	12.75	6.19	15.75	11.93	13.3	13.49	25	33.82	20.03	11.51	19.84	17.05	10.14	24.12	15.08	14.11	10.41	9.79	7.01	7.35	6.37	18	6.1	9.07	7.04	16.32	16.35	9.49	8.11	8.14	7.5	10.53	6.39	9.53	2.14	9.27	11.05	10.52	7.55	14.17	12.37	13.25	26.52	14.78	10.91	44.48	11.38	15.92	18.92
APOOP5	0.05	0	0.06	0	0	0	0	0	0	0	0	0.21	0	0	0	0.07	0	0	0	0	0	0	0	0	0	0	0	0	0	0	0	0	0	0	0	0	0	0	0	0	0	0	0	0	0	0	0	0.04	0.17
APOPT1	44.67	35.78	23.59	59.53	31.02	40.59	23.13	20.11	29.99	29.64	34.94	31.26	42.7	34.18	36.29	30.84	26.96	30.51	42.45	36.95	40.36	34.25	26.26	34.35	83.87	70.09	37.69	21.35	29.41	41.34	33.29	24.01	38.27	32.75	33.13	26.44	30.26	30.02	34.61	50	41.24	29.88	44.35	34.79	27.65	27.73	40.52	39.08	50.33
APP	519.33	498.85	450.92	261.61	679.27	618.21	1352.43	399.22	573.85	903.68	417.08	469.39	70.14	744.24	405.95	498.59	274.13	230.04	417.88	542.22	496.93	443.27	247.84	384.65	245.79	561.58	472.78	186.82	310.63	379.35	246.92	308.71	321.62	508.32	353.98	594.77	869.6	373.52	756.9	391.17	358.89	483.86	443.79	993.54	481.99	1860.22	765.33	688.19	493.97
APPBP2	14.26	8.75	11.7	8.64	17.42	21.24	38.75	17.02	26.49	23.68	18.52	18.67	9.83	28.39	24.34	21.38	9.45	15.12	7.25	12.78	10.16	8.78	9.82	13.06	7.54	14.05	6.92	7.95	7.54	13.39	8.81	6.15	7.69	7.73	10.59	21.7	12.97	8.28	16.35	15.26	8.27	16.4	10.06	20.07	11.06	22.48	12.56	22.2	15.04
APPL1	33.52	8.32	26.48	25.84	28.21	24.12	45.93	27.22	29.91	43.02	37.46	36.06	47.58	27.92	40.63	42.52	17.86	29.71	16.52	10.94	18.51	23.9	15.52	16.76	10.48	18.66	21.97	15.65	12.33	16.58	15.03	9.04	16.16	7.91	26.31	13.71	22.08	15.08	28.37	11.65	26.35	30.64	20.37	52.23	20.55	45.5	25.1	34.38	31.57
APPL2	25.95	24.48	77.02	50.73	70.88	44.33	38.58	96.38	48.45	62.48	42.03	55.37	122.98	93.24	65.86	47.19	34.6	30.73	21	31.76	29.1	17.69	12.7	15.1	24.65	18.6	29.1	28.81	51.27	40.43	32.55	40.84	27.73	43.96	22.29	78.27	57.43	20.88	40.18	47.04	35.83	58.75	31.53	52.82	37.07	20.94	36.14	61.87	35.99
APRT	212.31	331.09	266.65	245.33	300.05	187.49	133.78	141.36	143.32	219.85	274.18	176.2	192.15	180.27	120.03	237.48	288.17	231.81	360.11	482.68	384.78	359.8	418.86	539.86	327.01	355.83	446.74	243.16	280.16	433.89	296.2	402.19	331.16	457.93	467.88	316.72	402.25	387.06	237.64	377.01	415.13	362.43	426.78	233.26	150.86	228.04	229.19	179.18	179.42
APTR	10.3	7.44	7.86	12.42	15.72	4.81	4.08	5.68	6.68	5.85	4.75	8.75	16.12	11.49	7.96	6.98	3.92	3.3	10.11	5.5	2.55	3.63	4.68	6.61	6.68	18.31	10.81	3.2	6.74	5.89	7.02	5.78	6.06	8.16	8.28	9.25	14.32	2.55	2.86	5.93	11.99	5.9	27.68	11.41	1.87	8.13	8.86	4.13	8.31
APTX	37.6	27.3	18.4	22.41	24.33	20.53	28.09	85.98	34.44	20.73	30.09	35.85	24.1	31.53	19.86	16.23	19.61	17.65	8.97	14.09	21.06	20.06	16.41	22.26	21.91	20.16	28.89	10.85	9.01	21.16	13.77	11.7	15.89	17.85	13.12	13.95	18.74	15.86	22.03	14.39	64.95	29.68	37.34	26.32	23.2	41.76	20.59	21.92	28.13
AQP1	10.14	317.51	38.61	35.39	808.82	11.09	300.25	83.56	41.55	295.02	48.05	17.07	136.24	104.92	221.35	135.69	49.7	225.9	72.86	545.14	267.13	55.37	294.79	32.18	20.34	54.66	148.15	27.54	102.21	213.49	56.55	44.99	337.66	338.37	58.13	82	577.05	321.24	179.25	45.73	192.91	183.02	244.31	467.85	214.05	20.83	47.27	88.99	12.21
AQP10	0	0	0.03	0.31	0.21	0	0.04	0.13	0.96	0.14	0	0	0	0.89	0.29	0.04	0.36	0.03	0.03	0.09	0.03	0	0	0	0.03	0	0	3.93	147.23	0.84	0.76	1.08	0	1.44	0.04	0.51	0.7	0.24	0	0.06	0.41	0.1	0.11	0.33	5.71	0	0.86	6.93	0.09
AQP11	3.94	1.96	4.69	9.89	4.91	1.96	8.72	3.71	3.62	1.62	3.76	5.85	3.36	2.46	4.29	2.54	3.75	1.06	3.31	1.46	7.49	1.12	1.08	1.22	3.61	2.25	2.21	2.57	52.4	5.83	2.58	3.92	5.13	8.19	2.44	6.01	3.4	3.14	3.56	3.12	8.98	4.13	2.31	8.22	3.19	2.39	4.17	4.25	7.29
AQP12A	0.3	0	0.95	0.15	0.41	0	0	0	0	0	0	0	0	0	0.11	0.13	0	0	0	0	0	0.2	0	0	0.52	0	0.12	0	3.56	0	0	0.72	0	0.17	0	0.29	0.05	0	0.06	0	0.41	0.06	0	1.06	0	0	0	0.48	0
AQP12B	0.54	0	1.19	0	0.31	0.12	0	0.05	0	0.12	0.88	0	0.22	0	0	0	0	0	1.54	0	0.23	0	0	0	0	0	0	0	0	0	0.84	0	0	0	0.19	0	0	0.19	0	0	0	0	0	0.93	0	0.12	0	0.41	0.05
AQP2	0.01	0.09	0.15	0.01	0.09	6.72	0.61	0.23	6.55	0.36	0.02	0.26	0	0.25	0.14	2.43	0.12	0.28	0.06	0.38	0.03	0	0.12	0.05	0.04	0	1.35	0	0	10.67	0.05	0.87	0.02	0.04	0.05	0.01	0.01	0	1.2	0.01	1.18	0.41	0	0.17	0.28	0.06	0.06	1.26	0.43
AQP3	8.37	17.62	24.65	5.56	6.71	22.27	9.04	261.88	626.11	17.86	22.51	74.65	7.85	88.48	29.36	195.54	48.51	1581.43	19.27	26.64	11.37	9.04	15.93	47.84	13.98	16.44	20.18	49.35	125.51	35.78	39.28	38.52	6.16	35.73	71.44	27.1	33.54	25.98	28.14	11.07	215.86	51.56	40.66	10.7	89.23	27.73	13.52	11.74	2.83
AQP4	0	0.09	0	0.09	0	0.01	0	0.02	0.1	0	0.04	0.01	0	0.19	3	0.06	6.97	0.02	0	0.05	0	0	0.29	0	0.05	0.17	0	15.59	0	0.13	9.59	0.08	0.01	0	0.01	0.01	3.01	0.01	0	0	0.02	0	0	0	0	0.01	0.16	0.06	0
AQP4-AS1	0.18	0.23	1.63	0.5	0.49	0.87	1.1	0.1	0.38	0.13	0.08	1.95	0.46	0.17	0.17	1	0.15	0.08	0.12	0.36	0.1	0.2	0.2	0.15	0.32	0.56	0.08	0.1	0.07	0.05	0.22	0.13	0.1	0	0.2	0.07	0.06	0	0.42	0.07	0.2	0.07	0.48	0.35	0.12	0.26	0.44	0.99	0.8
AQP5	4.98	14.54	54.99	0.08	76.49	83.61	325.78	1.27	118.32	0.94	0.21	42.55	0.45	227.79	29.38	38.68	105.3	34.24	39.72	132.58	0.05	0.49	8.63	0	30.5	0	5.02	19.14	0.74	47.76	50.49	82.82	0.37	12.82	17.07	0.79	5.5	0.11	94.94	19.46	17.8	172.46	7.19	0.32	2.12	7.33	0.66	2.84	8.65
AQP6	0.31	0.47	2.63	0.51	0.42	2.86	2.81	0.44	1.18	0.48	0.32	4.02	0.91	1.3	0.77	2.68	0.3	0.33	0.38	0.43	0.35	0.19	0.33	0.24	0.67	0.28	0.43	0.46	0.25	0.23	0.52	0.32	0.14	0.83	0.53	0.16	0.32	0.21	0.3	0.14	1.02	0.29	0.7	0.4	0.13	0.7	0.9	1.46	1.45
AQP7	0.09	0.26	2.02	1.3	0.99	0.83	14.47	15.57	5.44	1.34	7.03	0.97	7.22	0.85	4.75	0.76	1.5	1.17	8.32	0.8	5.28	0.11	0.78	0.3	0.45	0	1.72	0.99	15.57	3.16	1.68	14.81	0.56	3.02	0.45	3.54	1.85	4.44	1.66	0.71	6.89	3.91	6.69	0.56	7.01	0.57	0.05	1.11	2.08
AQP7P1	0.08	0.58	0.46	0.87	0.13	4.02	4.35	2.49	0.95	1.52	0.37	0.43	1.84	0.36	1.25	0.86	0.39	1.23	0.95	1.24	0.46	0.02	0.46	0.14	0.22	0.25	0.17	0.22	0.42	0.31	0.35	0.6	0.14	0.39	2.26	0.43	0.47	0.41	0.29	0.12	1.4	0.42	1.57	0.7	0.19	0.27	0.32	0.68	0.54
AQP7P3	0	1.31	0.28	1.94	0	30.91	3.89	0.66	0.27	21.93	0.23	0.62	1.24	2.09	1.58	4.52	0.57	5.21	4.61	2.07	0	0.3	2.33	0.77	0.34	1.05	0.77	2.49	0	0.26	1.93	2.23	0.64	0.12	9.18	0.25	0.67	1.42	1.06	0	2.55	0.13	11.28	1.78	0	0.4	0.38	0.78	0.5
AQP8	0.04	0	0.1	0	0.09	0	0	0.05	0	0.05	0.04	0	0.47	0.08	0	0.05	0.07	0.05	0	0.06	0.04	0.05	0.14	0	0.09	0	0	0.19	0	0	0.89	0.76	0.12	0.27	0.16	0	0.12	0.6	0.05	0.18	0.1	0	0	0.13	0.63	0	0.09	0.96	0
AQP9	43.4	16.16	8.93	10.01	23.92	14.62	0.39	15.71	11.17	101.49	14.31	7.96	43.77	30.24	9.81	13.99	5.09	2.47	10.85	10.65	16.59	5.97	0.75	14.08	9.14	0.32	0.75	1.88	0.55	8.12	0.82	10.04	5.17	3.33	0.77	2.42	8.84	5.1	57.67	5.25	4.51	4.43	2.09	5.14	29.51	12.42	9.76	27.18	3.45
AQR	35.36	10.6	32.3	36.22	27.12	40.99	50.52	67.48	38.54	37.22	47.58	31.18	47.67	38.35	44.81	46.75	23.32	31.03	13.72	14.35	22.04	21.91	18.57	18.29	12.48	22.06	27.72	13.92	11.3	17.01	13.09	12.12	25	19.01	13.04	12.51	19.9	15.76	29.89	17.36	30.85	15.12	24.71	48.56	19.27	86.36	29.8	44.84	54.07
AR	0.13	0.24	0.4	0.2	0.35	0.38	0.37	0.33	5.37	3.84	0.32	0.23	0.25	7.34	2.11	0.71	0.21	2.51	0.16	1.52	0.18	0.25	0.29	2.1	0.19	0.16	0.07	0.54	0.6	0.08	0.39	0.03	0.15	0.28	0.96	2.52	1.17	1.46	2.56	0.39	0.34	0.27	0.11	0.69	0.72	0.22	0.51	1.08	0.12
ARAF	110.42	57.75	68.7	81.94	102	62.04	65.32	68.48	56.64	83.57	66.39	57.05	53.02	69.5	81.17	67.84	106.53	73.73	77.06	101.68	102.46	114.75	77.64	46.13	109	72.16	123.32	88.45	56.87	97.9	102.42	97.04	82.9	115.19	85.99	88.26	120.48	115.28	86.82	100.03	125.77	97.13	91.09	56.8	130.5	72.72	67.34	66.62	77.01
ARAP1	26.91	37.86	41.63	25.43	45.68	24.93	30.59	34.74	25.77	67.44	22.55	22.53	21.74	23.77	41.18	16.24	34.07	31.17	59.25	47.75	35.95	45.36	45.63	18.95	57.63	37.56	36.15	36.57	21.25	51.86	34.31	22.22	33.99	31.89	74.51	58.05	39.62	76.64	68.71	37.58	27.33	22.15	17.51	33.97	56.04	30.93	70.28	58.78	27.99
ARAP2	9.4	4.49	9.98	4.48	4.7	8.81	9.9	9.74	5.33	13.46	12.67	6.14	8.19	5.45	12.64	15.79	6.06	20.33	3.87	3.35	6.52	10.35	4.04	5.29	5.7	1.54	4.89	3.94	5.75	4.95	3.41	4.31	5.45	5.28	6.4	12.14	5.08	3.98	6.39	14.14	4.26	2.24	4.35	10.55	2.81	6.42	6.54	6.75	4.7
ARAP3	3.92	8.76	6.39	13.03	9.58	7.79	6.8	4.35	7.26	18.59	2.23	4.69	7.19	9.99	7.14	5.38	7.69	5.22	10.45	15.52	5.56	4.15	6.55	6.61	7.81	5.56	8.99	3.63	2.93	13.75	5.53	4.45	18.79	11.7	34.29	21.03	16.64	10.25	24.81	16.2	12.42	10.63	16.14	13.02	14.9	14.16	11.32	20.56	18.19
ARC	0.1	0.24	0.24	0.53	0.09	0.16	0.13	0.15	0.14	1.32	0.03	0.07	0	0.3	0.2	0.34	0.39	2.18	0.62	0.32	0.15	0.3	0.4	7.65	0.61	0.25	0.1	0.16	2.75	1.72	0.32	1.03	0	0.47	2.14	0.08	0.14	0.3	0.25	0.27	0.52	0.16	1.68	0.34	0.68	0.75	0.05	0.21	0.02
ARCN1	211.47	65.27	224.76	163.92	142.96	220.69	96.8	226.95	202.29	173.51	201.07	198.7	172.79	186.17	162.08	186.62	162.91	109.12	47.37	65.16	116.3	105.83	107.65	128.67	57.44	73.64	96.87	73.52	96.84	103.75	81.02	95.95	91.29	78.14	127.78	146.86	102.97	81.17	138.76	127.87	239.79	129.51	212.41	121.69	117.51	254.63	141.62	184.15	135.23
AREG	269.28	115.08	21.04	28.9	24.96	204.67	66.58	33.86	39.38	93.96	238.99	131.18	29.23	54.64	46.11	619.86	38.97	87.67	31.4	42.79	86.12	154.44	41.97	147.33	133.96	42.73	30.28	16.81	86.82	27.87	31.39	236.5	6.27	60.41	26.37	11.85	13.31	50.97	112.59	131.89	43.72	10.66	64.7	14.8	1.7	73.34	21.15	34.79	18.86
AREL1	24.43	15.72	23.35	27.05	26.16	24.74	24.04	31.13	26.38	31.04	25.06	28.28	26.13	22.34	30.65	18.42	20.6	18.24	10.44	13.92	17.72	19.01	15.66	14.36	18.85	16.82	20.07	14.07	15.07	18.8	11.86	9.91	18.27	19.93	20.11	11.83	15.93	13.64	27.61	17.47	17.05	13.25	25.83	31.04	17.44	54.24	22.25	38.92	27.48
ARF1	724.95	600.95	705.68	703.04	784.67	568.74	643.21	654.85	999.98	630.77	660.54	889.97	610.68	583.43	616.78	584.76	738.77	538.63	626.42	746.5	776.25	559.34	554.23	673.92	443.25	880.79	763.39	474.24	532.65	753.42	544.78	632.03	523.41	799.02	670.12	927.25	941.86	601.91	651.6	663.48	834.45	1070.11	719.44	602.36	923.27	1447.19	816.47	564.23	739.76
ARF3	148.7	110.18	142.59	126.2	124.64	94.59	194.87	150.72	186.38	140.53	144.04	143.52	101	122.55	117.62	106	108.93	139.33	140.9	160.69	170.38	178.44	187.32	138.31	154.85	282.76	138.82	101.33	96.78	179.93	94.84	93.77	147.24	189.4	88.81	177.74	151.17	145.44	158.85	174.35	209.6	140.91	105.62	236.8	193.69	162.9	163.91	182.07	181.85
ARF4	397.39	193.96	265.33	315.34	405.97	654.59	485.29	369.2	381.17	525.2	568.96	310.28	321.65	741.13	354.68	548.97	490.33	289.93	205.95	262.83	355.72	269.44	230.9	740.65	182.51	192.18	349.16	213.18	276.21	287.04	263.13	300.34	346.55	125.98	344.09	269.48	356.15	262.49	416.82	258.56	268.92	445.24	292.03	465.05	259.64	428.18	415.45	354.21	369.39
ARF5	252.77	261.35	108.29	200.92	252.86	99.44	209.23	155.31	113.72	146.16	141.09	169.84	202.13	93.3	137.1	153.58	157.81	232.65	445.74	246.95	260.67	247.39	209.61	238.87	234.87	778.62	387.72	164.55	178.84	225.21	226.56	181.46	246.59	277.38	198.92	280.6	192.3	224.41	227.74	213.61	111.44	259.35	223.84	180.99	173.74	182.71	234.95	166.88	184.13
ARF6	68.31	68.87	58.08	69.74	75.03	85.89	51.8	83.25	68.31	64.45	77.01	81.32	98.6	68.36	65.47	71.49	88.25	160.48	59.44	79.72	79.72	115.44	63.18	62.62	80.1	34.88	90.38	61.94	72.99	52.03	63.57	70.72	69.63	67.64	53.44	49.33	67.87	73.05	83.76	101.34	60.41	66.97	88.9	66.16	50.81	36.25	81.36	103.44	106.76
ARFGAP1	29.77	31.75	50.96	46.68	61.39	30.71	122.73	55.12	33.65	33.94	20.37	42	34.31	57.01	39.61	23	46.61	28.18	51.97	48.31	37.96	38.62	44.38	26.05	59.94	40.39	53.34	27.87	28.31	53.32	25.74	36.99	42.63	61.31	51.96	68.66	34.72	30.08	47.31	61.08	46.93	44.07	70.34	41.78	41.54	97.95	83.67	60.77	59.16
ARFGAP2	37.7	43.45	51.76	36.3	63.46	28.55	62.99	48.97	22.49	35.15	29.77	31	37.39	38.55	37.05	36.75	48.23	54.53	54.68	52.33	51.24	30.96	52.86	26.37	28.78	36.23	59.04	36.92	26.47	46.44	38.8	32.72	46.34	52.49	26.2	98.86	40.15	46.5	52.32	56.52	44.7	48.12	56.45	32.42	39.47	64.92	47.02	49.71	49.04
ARFGAP3	56.55	22.83	46.34	57.91	47.26	56.4	96.46	70.59	63.64	80.84	101.41	55.91	35.82	133	42.46	62.36	70.54	44.74	43.04	37.94	40.91	36.81	39.6	31.98	20.13	41.97	18.07	39.53	38.01	29.35	35.77	41.27	35.14	31.04	26.06	57.31	49.48	28.91	52.94	35.72	76.83	71.79	25.39	92.29	39.2	77.25	56.77	47.05	38.64
ARFGEF1	79.7	14.87	78.48	16.58	30.25	39.72	36.04	27.82	61.54	45.89	37.93	40.61	50.05	50.82	37.41	29.78	22.64	29.44	20.84	12.75	17.53	16.71	14.01	14.18	9.87	29.71	34.46	12.91	15.28	22.05	12.87	13.47	19.42	43.38	21.77	21.77	15.68	9.99	37.08	25.09	20.73	17.2	28.67	75.17	16.45	99.34	13.04	36.66	28.39
ARFGEF2	77.22	12.95	69.28	39.62	40.88	25.75	122.9	41.22	36.85	28.35	31.73	51.91	42.01	58.04	45.76	27.3	24.46	21.06	20.9	11.05	15.83	16.14	16.29	11.02	14.33	17.94	28.88	15.42	15.34	58.18	13.62	14.47	10.07	29.95	16.67	24.99	16.85	9.2	20.1	22.13	36.73	18.37	45.54	62.15	19.75	68.87	28.38	41	30.69
ARFGEF3	18.58	11.27	24.14	8.71	9.26	11.86	4.72	29.44	12.45	13.67	4.68	33.92	10.79	23.52	14.92	8.13	17.26	8.21	8.19	5.32	8.46	8.46	4.31	5.02	6.35	8.07	14.12	8.99	3.27	22.04	8.18	5.34	6.95	6.71	19.48	2.24	14.07	2.62	12.35	4.03	23.83	18.62	16.24	40.28	32.96	58.99	7.77	12.26	14.27
ARFIP1	48.79	34.89	33.48	20.74	31.72	35.71	57.55	37.42	40	41.6	48.32	36.71	43.86	47.95	36.68	45.39	29.08	31.13	19.04	44.75	36.75	23.87	30.68	25.37	23.39	16.27	35.17	21.23	26.94	31.39	26.07	24.69	27.26	52.26	47.68	37.91	27.49	17.46	41.44	30.63	42.28	44.92	22.14	29.96	23.6	24.23	29.72	52.68	38.84
ARFIP2	25.57	29.92	40.27	33.38	37.1	26.71	31.56	25.77	31.18	19.66	29.31	37.28	19.81	40.19	27.13	23.17	59.07	27.88	42.7	30.55	39.28	32.35	37.71	27.71	23.67	22.96	30.05	27.9	28.37	39.53	29.01	31.79	25.23	28.81	26.39	50.24	22.5	23.47	30.59	28.65	26.96	37.84	33.56	33.24	24.2	30.98	41.05	30.64	25.83
ARFRP1	17.5	22.4	19.48	28.9	30.17	8	71.86	17.78	8.03	18.23	16.5	22.92	14.08	19.41	30.66	15.65	22.18	21.13	34.25	36.11	28.73	20.39	34.62	12.87	37.71	19.86	25.17	16.55	16.49	37.63	19.31	25.34	28.89	39.24	23.18	24.87	22.97	31.41	30.16	20.71	15.98	16.14	48.86	16.93	19.68	21.21	25.72	22.97	21.24
ARG1	0.33	0.05	0.17	0.18	0.23	0.13	0.16	0.36	0.25	5.29	0.1	0.48	0.16	0.11	0.04	0.5	0.13	0.74	0.13	0.17	1.43	0.05	0.12	0	0.08	0	0.04	0	0.12	0.12	0.1	0	0	0	0.05	0.04	0.07	0	0.13	0.04	0.04	0.04	0.05	0.23	0.67	0.39	0	0.16	0.19
ARG2	26.21	9.75	12.77	11.04	17.63	24.08	9.67	13.09	33.38	13.01	21.94	21.99	7.77	18.19	16.37	40.64	12.32	34.63	3.89	6.45	7.35	7.73	4.29	11.09	6.63	15.78	14.77	4.93	22.67	12.05	5.31	10.26	7.11	16.57	11.13	4.93	7.98	6.72	8.7	8.43	17.27	5.98	10.43	29.93	81.93	19.11	7.34	20.19	18.67
ARGFX	0.21	0.04	2.18	0.46	0.17	1.94	1.98	0.35	0.35	0.32	0.21	2.5	0.55	0.26	0.28	1.45	0.05	0.13	0.18	0.11	0.08	0.09	0.26	0.12	0.14	0.06	0.13	0.18	0.13	0.08	0.12	0.23	0.04	0.08	0.09	0.09	0.05	0.09	0.17	0.03	0.23	0.08	0.32	0.26	0.08	0.17	0.39	0.94	0.79
ARGFXP2	0.27	0	0.69	0.61	0.42	0.54	0.54	0.5	0.72	0.27	0.17	0.36	0.51	0.27	0.49	0.34	0.23	0.2	0.32	0.42	0.17	0.18	0.22	0.08	0.42	0.07	0.1	0	0.29	0.1	0	0	0.06	0.25	0.12	0.21	0.13	0.12	0.38	0.2	0.31	0.46	0.41	0.22	0.15	0.22	0.53	0.75	0.68
ARGLU1	87.94	35.75	63.65	60.96	45.75	60.75	162.29	41.14	67.48	52.03	43.04	80.61	116.49	40.28	83.56	71.61	47.94	35.08	26.53	41.53	37.31	47.52	63.23	28.6	35.23	61.68	43.24	48.21	29.47	37.43	35.99	34.91	62.13	41.21	63.74	26.77	27.41	30.33	49.91	16.2	59.53	29.65	56.61	46.5	49.4	56.85	53.08	54.93	67.92
ARHGAP1	77.32	130.51	102.7	92.74	155.49	83.33	115.8	127.32	86.46	181.45	80.31	72.6	78.3	124.28	108.76	80.55	103.84	148.19	104.47	186.25	109.94	115.75	110.11	62.42	81.07	59.2	128.45	70.78	55.07	89.73	77.39	82.35	93.43	100.75	95.42	214.39	131.72	143.44	209.2	115.38	93.85	89.86	71.09	86.63	165.25	125.45	107.53	191.08	120.58
ARHGAP10	1.76	4.16	14.66	7.66	4.23	10.72	2.46	4.79	8.12	18.29	9.82	9.59	6.82	15.24	14.37	11.23	10.69	31.53	12.99	15.54	2.77	10.53	23.75	9.84	14.41	10.24	6.44	8.49	3.23	5.67	8.81	5.54	8.12	4.88	13.61	8.73	9.49	10.44	16.23	15.23	20.84	8.86	1.22	6.12	18.54	8.94	18.25	11.78	10.79
ARHGAP11A	23.88	12.41	25.89	39.98	22.94	30.96	10.15	48.58	28.41	7.84	28.79	26.01	26.67	21.39	17.63	30.86	17.01	7.86	14.47	6.73	16.34	14.79	9.29	10.16	14.07	11.71	28.77	3.85	3.89	6.71	3.29	7.66	10.35	15.07	9.38	4.63	8.78	7.67	13.79	13.13	19.42	11.66	25.32	26.93	25.66	72.26	16.32	27.44	37.09
ARHGAP11B	1.48	0.82	5.67	4.25	3.99	2.96	2.15	4.92	5.16	1.58	2.83	5.01	6.2	2.63	5.18	5.03	2.41	1.11	2.06	0.65	1.74	3.62	1.49	1.46	1.68	1.33	5.65	1.04	0	1.61	0.53	0.32	1.56	2.33	1.97	0.81	1.92	1.07	2.25	2.62	4.88	0.62	4.14	6.18	3.23	16.05	3.37	5.81	5.7
ARHGAP12	35.49	20.67	51.97	50.07	41.25	83.93	47.81	71.62	43.03	35.05	28.67	44.24	55.4	22.2	69.46	34.12	27.49	13.93	16.7	18.68	16.57	9.9	15.05	5.99	12.84	22.05	21.07	18.94	12.35	13.91	24.85	14.57	19.22	17.33	32.6	29.34	15.59	9.36	26.01	32.98	37.45	20.62	100.33	35.04	13.18	80.62	16.95	25.87	65.25
ARHGAP15	7.05	4.95	10.12	5.42	4.48	3.24	7.72	12.02	4.81	36.48	10.3	3.87	7.79	8.09	24.51	17.63	12.06	8.8	7.69	6.89	8.57	12.43	13.29	7.44	1.91	1.31	1.25	22.91	4.79	9.69	13.01	8.7	10.01	8.11	3	4.92	17.59	35.27	10.25	2.47	3.2	3.7	1.69	3.27	7.98	4.3	21.23	7.38	2.93
ARHGAP17	51.16	28.47	53.52	57.92	40.02	27.71	25.23	49.31	32.18	63.15	47.37	30.7	36.81	34.91	39.77	49.87	32.11	40.41	33.01	33.9	55.04	46.99	27.02	26.79	49.62	44.5	35.92	36	43.07	32.7	26.55	34.93	33.12	41.03	57.75	42.53	41.48	58.25	53.52	52.43	46.32	20.99	43.65	59.87	51.71	26.42	42.38	73.96	50.35
ARHGAP18	27.96	21.74	92.04	62.06	26.86	72.5	24.43	34.86	48.48	54.04	38.63	63.89	32.17	29.29	44.95	34.75	33.72	13.15	22.31	21.35	23.14	32.6	14.09	19.27	34.82	12.52	24.26	23.85	23.46	42.33	27.62	17.13	20.52	26.79	58.23	15.85	27.32	17.36	33.6	32.08	32.35	24.32	21.93	43.18	19.67	25.58	39.55	50.91	25.84
ARHGAP19	5.09	2.86	7.54	6.19	5.01	4.49	7.98	7.25	5.59	6.63	6.69	5.27	7.48	6.25	12.37	8.86	5.65	4.72	1.72	2.34	4.82	4.19	2.9	2.19	4.42	4.47	5.82	3.61	1.7	3.45	2.62	2.31	3.68	4.5	5.09	2.81	3.63	3.81	4.5	5.18	6.89	3.22	2.68	5.35	4.06	8.24	6.24	7.21	9.99
ARHGAP19-SLIT1	0.32	0.62	1	0	0	0	0	0.41	0.59	0.41	0	0	0	0	0	0.59	0.01	0	0	0	0.54	0.26	0	0.12	0	0	0	0	0.56	0.4	0.37	0	0	0.09	0	0	0	0	0	0.69	0	0	0	0.07	0.59	0	0	0.53	0
ARHGAP20	0.24	0.44	0.91	0.32	0.52	0.43	0.66	0.94	1.93	2.58	0.72	0.4	0.19	2.59	2.83	0.8	0.91	2.28	0.27	0.75	0.48	0.67	0.58	0.7	0.23	0.22	0.1	0.75	0.73	0.34	0.89	0.63	0.4	0.61	0.37	0.63	1.07	1.71	1.02	0.48	0.32	0.43	0.1	0.36	1.24	0.49	1.01	1.65	0.17
ARHGAP21	38.66	25.41	43.48	78.25	22.28	43.29	32.98	77.81	58.68	62.77	38.66	45.58	77.55	22.75	77.03	41.57	40.31	17.41	13.01	22.9	21.23	26.18	13.19	17.22	33.25	23.22	28.17	25.17	17.74	11.1	24.35	18.4	26.27	18.19	52.06	29.3	17.47	15.97	39.6	24.86	49.92	19.51	21.58	40.46	23.33	26.52	15.12	42.17	60.06
ARHGAP22	0.17	1.55	0.81	0.64	1.57	0.5	1.05	1.3	0.85	3.83	1.02	1.94	0.69	1.64	1.78	0.84	0.92	2.19	2.23	3.52	1.41	2.46	4.36	1.38	7.46	11.2	0.22	1.12	0.37	1.21	1.45	0.82	1.58	2.42	3.87	1.63	3.62	7.71	4.76	0.91	2.09	0.75	1.44	1.66	4.17	8.35	3.74	1.88	0.25
ARHGAP23	5.61	10.4	48.46	57.97	13	12.72	10.58	15.83	12.43	27.87	5.31	3.79	5.3	16.09	14.56	16.18	7.78	70	26.95	51.88	15.79	12.93	24.9	11.33	34.11	34.55	4.64	6.58	5.97	15.03	7.9	7.38	11.66	16.53	31.99	74.94	15.55	26.92	41.09	169.76	11.94	12.99	6.27	27.3	20.96	28.99	10.62	22.36	9.57
ARHGAP24	2.15	4.32	7.06	1.83	15.29	3.07	9.93	5.31	8.7	24.11	3.72	4.01	3.58	10.8	22.05	6.3	11.49	5.5	7.28	12.86	4.47	2.79	4.16	1.91	1.36	1.78	3.55	12.54	1.84	7.38	14.73	5.32	4.42	6.5	2.35	15.8	22.4	10.72	20.94	9.61	4.73	6.21	2.46	5.07	6	2.29	7.84	8.2	1.61
ARHGAP25	6.51	9.59	11.4	6.82	8.41	4.96	3.71	11.96	5.71	25.17	12.14	2.11	7.45	5.98	18.23	15.5	15.65	14.02	8.86	9.48	13.75	20.57	22.15	8.34	4.11	3.05	2.13	32.66	5.24	15.11	17.72	14.99	12.27	10.8	7.73	6.24	19.58	41.87	15.85	6.36	2.87	5.52	1.65	4.03	13.87	7.44	33.34	12.23	3.59
ARHGAP26	9.64	12.05	16.86	21.15	27.64	29.15	16.54	31.08	22.57	30.33	14.04	15.71	25.92	46.13	23.42	21.42	19.13	8.38	6.64	18.77	12.63	12.8	26.27	7.04	12.36	4.88	13.63	8.84	10.27	15.11	9.14	12.5	14.73	11.08	24.22	12.4	18.21	8.34	33.4	4.65	15.55	7.52	15.26	18.22	8.04	8.4	9.96	14.26	12.85
ARHGAP26-AS1	0	0	0	0	0	0.07	0	0	0.07	0.07	0	0	0.07	0.17	0.38	0.07	0	0.2	0	0.09	0	0.08	0.38	0	0.06	0	0	0	0	0.2	0.17	0.35	0	0.06	0.08	0	0.06	0	0.14	0	0	0	0	0	0.1	0	0	0	0.06
ARHGAP26-IT1	0	0	0	0	0.38	0.27	0	0.47	0	0	0	0.28	0	0	0	0.28	0	0	0	0	0.38	0	0	0	0.19	0	0	0	0	0	0	0	0	0	0.48	0	0	0	0	0	0	0	0.24	0.29	0	0	0	0	0
ARHGAP27	32.94	38.36	40.3	49.4	66.54	38.9	13.78	25.89	18.2	32.87	39.02	32.43	38.23	23.96	21.9	27.6	41.13	88.69	31.1	52.42	47.61	25.19	34.18	15.32	84.74	26.89	53.79	29.87	41.78	45.75	24.12	41.13	24.27	46.85	70.62	65.05	31.24	35.28	50.79	81.14	119.47	33.56	45.33	63.91	19.88	41.1	24.49	55.72	45.7
ARHGAP28	1.13	0.31	0.43	0.61	0.88	0.27	1.06	1.28	3.61	2.51	0.65	2.51	0.31	2.36	5.02	1.59	1.73	3.01	0.59	1.31	0.66	0.29	1.12	1.36	0.38	0.53	0.69	1.81	1.91	1.19	2.22	1.23	0.38	1.48	0.23	0.4	0.67	1.06	7.99	0.46	0.97	1.5	0.09	1.1	2.02	3.6	0.9	5.2	0.77
ARHGAP29	2.78	2.05	6.14	16.94	4.85	18.18	8.91	8.64	8.41	18.5	4.22	2.77	7.17	17.19	13.57	6.89	4.46	4.87	3.63	6.49	3.92	4.29	8.2	2.38	17.64	2.02	1.39	3.18	1.38	1.85	3.69	2.65	1.82	4.34	3.62	3.18	8.75	3.98	11.94	23.73	3.13	3.01	3.85	5.63	5.7	5.08	7	8.69	5.91
ARHGAP30	3.94	11.65	10.12	4.73	8.22	3.15	3.08	10	4.31	27.07	7.82	3.11	5.93	5.44	16.01	8.9	20.69	15.77	14.7	14.89	15.03	32.65	27.11	8.9	6.4	3.36	2.74	32.89	7.17	16.02	22.48	18.02	13.49	14.05	10.04	9.53	21.67	60.95	17.37	6.83	6.77	6.96	3.46	7.22	18.04	10.78	41.1	18.28	4.71
ARHGAP31	4.66	5.66	4.51	3.93	10.51	5.57	6.68	9.57	5.46	31.47	10.1	8.83	8.76	13.19	14.58	8.52	6.1	12.04	5.38	15.41	7.99	14.41	22.85	6.18	4.13	2.91	2.82	5.79	5.01	5.92	5.66	7.19	4.11	10.27	5.96	21.55	18.68	23.56	24.95	6.1	4.09	7.58	3.14	7.03	15.88	6.42	14.4	19.59	2.88
ARHGAP31-AS1	0.62	0.14	0.12	0	0.51	0	0	0.92	0.7	0.37	0.2	1.22	0	0.4	0.46	0.91	0	0.33	0.46	0.91	0	0.26	0.16	0.85	0.6	0.92	0	0	0.31	0.68	0.42	0.39	0	0.22	2.57	1.12	0.49	0.26	0.35	2.89	0.45	0.11	0	0.16	0.33	2.68	0	2.16	0.11
ARHGAP32	26.73	10.39	38.81	17.12	23.34	15.35	23.24	99.69	10.33	21.03	94.09	66.75	45.87	23.77	20.79	52.8	18.69	45.28	9.22	14.55	35.66	24.08	8.36	8.36	24.9	29.52	25.8	12.13	29.09	14.41	12.08	21.71	13.79	11.82	48.75	17.13	8.79	13.74	21.01	17.05	36.55	8.28	59.85	34.97	16.69	63.46	9.99	13.79	35.22
ARHGAP33	1.66	3.64	3.43	3.37	6.91	1.86	4.09	3	6.71	1.91	1.39	1.84	1.87	3.65	2.71	2.52	2.06	2.55	15.42	2.52	2.63	5.1	2.2	1.83	1.59	14.51	2.95	1.37	0.81	1.33	1.2	1.63	3.75	3.49	4.33	1.25	2.1	1.3	2.13	3	3.9	1.5	7.46	3.93	11.81	6.77	5.97	2.81	3.27
ARHGAP35	36.58	18.07	47.63	57.89	27.3	40.62	22.98	38.04	43.85	34.89	23.89	27.62	33.33	53.17	34.53	16.8	27.43	26.52	26	30.69	28.3	25.58	28.08	11.03	24.65	29.16	26.36	17.62	25.97	19.09	15.97	12.69	32.69	27.25	25.69	38.73	31.11	22.05	33.87	29.95	47.31	14.15	32.14	44.9	56.36	61.39	45.84	33.67	32.14
ARHGAP36	0	0	0.04	0	0	0	0	0	0.94	0	0.25	0	0	0.02	0.02	0.02	0	0	0.02	0	0.02	0.02	0	0.03	0.06	0.03	0.02	0.08	0	0	0	0	0	0.08	0	0.02	0	0	0	0	0	0	0.02	0.03	0.06	0.02	0.02	0.04	0
ARHGAP39	5.46	4.39	9.64	4.21	9.52	8.76	8.55	5.17	8.52	4.62	2.8	11.24	4.78	3.85	4.04	3.64	3.06	5.2	23.69	5.17	8.03	9.87	5.3	4.64	6.97	19.99	20.18	1.18	4.12	10.73	1.36	4.1	4.71	19.57	8.53	14.67	4.05	3	7.66	16.26	27.75	6.1	11	11.04	7.83	22.97	5.84	11.75	9.13
ARHGAP4	12.25	13.7	29.4	5.36	8.81	1.71	18.09	29.24	19.16	16.31	5.76	1.5	4.43	8.69	19.56	9.16	19.89	12.38	21.58	30.66	13.3	27.76	25.8	5.89	33.28	21.62	2.75	21.99	5.81	23.33	14.1	11.93	13.58	42.52	7.93	22.07	20.08	61.53	39.5	42.32	48.01	10.77	36	13.87	20.05	30.07	29.71	53.4	3.3
ARHGAP40	0.11	0	0	0.1	0.02	0.02	0.03	0	2.25	0.13	0	0	0	14.33	0.37	0.94	0.76	6.94	0.58	0.64	0	0.02	0.03	0.16	0.06	0.09	0.02	0.59	0	1.6	0.39	0.15	0	0.04	0.24	3.94	0.13	0	0.02	3.26	0.23	5.8	0.26	0.03	0	0.31	0	0.16	0
ARHGAP42	4.35	4.62	21.02	19	16.37	19.11	5.38	25.68	12	14.33	15.79	8.26	13.1	11.73	18.67	11.99	9.76	4.97	3.47	4.43	5.3	6.83	12.17	2.83	7.85	2.65	13.33	4.34	9.59	7.07	6.77	6.28	5.22	4.95	13.53	7.83	4.42	2.66	14.05	25.15	11.66	7.07	6.01	7.74	2.08	8.06	4.4	15.84	5.63
ARHGAP44	4.1	5.49	2.21	0.65	13.18	0.75	48.58	4.76	8.29	11.35	7.63	1.15	2.41	11.57	19.11	5.33	10.6	5.87	2.33	4.73	15.88	8.92	1.54	5.1	2.14	2.64	17.39	4.12	12.54	14.81	6.27	8.93	8.01	17.02	0.68	17.36	6.27	6.57	17.49	1.67	1.76	7.23	10.11	8.42	6.91	11.13	11.36	10.02	12.45
ARHGAP5	42.91	10.42	39.11	27.38	24.57	16.44	46.81	62.97	35.43	37.38	38.17	51.61	49.66	49.02	44.44	38.25	16	46.56	11.77	18.48	17.73	22.89	15.67	20.32	12.86	11.74	17.61	10.97	19.6	18.14	13.62	12.48	17.27	16.58	12.6	28.63	18.17	9.1	25.22	32.18	49.1	14.25	45.74	48.21	23.88	50.02	19.1	37.77	31.22
ARHGAP5-AS1	7.43	1.52	7.43	2.71	6.55	1.73	26.82	7.59	4.21	4.08	2.05	15.68	4.91	8.36	5.44	6.35	3.9	11.32	9.51	8.32	7.29	0.9	4.75	1.77	5.34	2.47	2.52	1.75	6.95	4.21	2.26	6.31	3.58	5.46	2.34	12.96	5.04	3.79	4.41	16.54	15.66	1.1	30.03	8.21	6.72	9.17	2.2	4.11	3.03
ARHGAP6	0.97	1.53	1.79	2.45	3.1	1.99	2.13	1.98	7.68	11.37	1.5	10.37	17.86	2.48	6.03	5.52	6.15	3.33	1.48	3.62	2.85	0.88	2.18	6.05	0.41	1.27	0.77	2.03	3.26	1.68	3.06	3.2	1.2	4.24	4.6	2.89	4.61	4.25	15.73	1.04	4.73	3.74	28.13	1.64	8.67	4.03	2.62	13.5	1.1
ARHGAP8	34.12	33.55	24.49	0.93	18.92	34.63	82.04	23.14	10.58	22.87	23.57	28.68	24.14	21.99	14.29	22.27	20.43	16.85	44.72	18.99	21.58	20.18	46.45	17.26	26.33	55.99	32.19	6.39	6.92	16.1	13.09	12.12	30.15	19.06	17.18	71.61	21.3	11.69	31.56	21.48	284.2	11.31	20.33	37.21	1.56	11.2	14.82	55.24	72.63
ARHGAP9	5.56	14.35	9.84	6.01	7.16	3.67	2.97	11.27	10.09	28.02	8.56	2.09	8.44	5.57	12.43	16.58	12.48	9.68	13.85	7.65	9.49	27.09	36.92	8.22	6.11	2.16	2.2	30.91	5.11	10.89	14.08	15.06	16.3	11.28	6.25	3.75	13.31	46.41	14.62	5.23	4.3	3.9	2.81	4.22	9.18	6.98	33.84	13.7	3.87
ARHGDIA	293.23	740.07	300.36	390.2	757.07	334.96	585.21	331.6	249.73	422.47	359.49	282.25	295.05	220.44	290.23	380.84	858.84	471.28	569.67	813.73	820.29	724.66	668.99	505.1	995.1	630.92	655.48	504.3	605	749.28	528.15	586.06	500.38	593.64	844.82	560.91	612.64	725.85	668.19	639.94	385.55	574.76	592.9	394.27	650.08	591.91	344.23	467.79	492.97
ARHGDIB	139	179.95	295.35	121.13	133.3	97.83	169.31	263.39	109.2	482.18	240.1	105.05	173.08	202.02	317.87	333.29	235.09	179.66	216.26	373.43	259.77	389.42	633.62	306.42	362.13	85.56	73.79	447.59	133.89	222.63	353.4	296.82	234.07	261.46	134.66	132.99	324.32	797.86	259.03	268.95	218.47	121.99	53.22	72.03	304.88	64.68	482.68	168.25	65.57
ARHGDIG	5.61	0.09	0.21	2.12	0.5	1.77	10.14	0.14	31.59	0	0.12	0.08	0.28	1.75	1.47	0.23	15.88	0.75	0.21	1.02	0.99	0	1.48	0.42	0.12	12.59	30.23	13.4	6.71	1.51	14.52	7.42	0.34	1.13	0.08	0.14	9.28	3.02	1	0	1.24	37.58	0.31	2.12	1.52	1.29	0	0.27	0.19
ARHGEF1	28.37	50.83	65.8	87.68	63.35	37.05	40.24	39.33	40	51.78	22.72	36.47	34.21	36.84	34.29	35.81	58.21	50.02	79.97	80	43.55	60.66	57.71	40.25	74.91	31.14	63.15	49.92	22.27	39.76	39.62	42.72	67.4	69.2	60.49	80.6	82.77	64.79	77.03	47.69	31.65	45.12	47.56	48.3	49.33	118.09	94.54	76.09	37.85
ARHGEF10	9.77	5.32	7.53	1.75	6.89	23.83	8.26	10.15	27.95	20.02	4.69	37.67	14.13	12.49	17.98	19.61	6.52	3.73	12.4	13.28	4.72	2.7	3.89	15.23	4.29	5.84	3.55	4.71	2.53	6.13	4.5	4.32	1.32	3.65	13.26	8	9.49	9.1	11.6	2.71	7.35	9.57	1.76	3.51	7.69	47	4	13.19	1.98
ARHGEF10L	28.31	19.03	31.23	22.59	84.21	6.08	23.9	37.52	5.81	27.92	31.68	20.91	23.97	12.69	28.82	20.2	20.45	51.01	112.42	22.68	49.7	31.72	18.04	5.64	11.13	7.8	47.15	10.74	19.83	26.45	11.02	21.39	23.53	48.65	28.41	61.92	25.95	26.6	45.27	36.04	46.04	13.09	37.63	78.52	41.95	96.2	22.11	32.83	19.86
ARHGEF11	26	26.17	32.19	19.86	27.03	18.64	38.75	20.03	40.13	37.97	26.26	27.28	32.63	24.76	41.07	24.07	29.09	21.8	35.63	23.35	19.18	20.04	17.44	14.2	11.25	33.29	24.06	19.31	22.56	28.35	18.76	15.46	20.44	31.85	40.7	44.53	31.83	19.96	31.95	17.28	52.37	21.26	29.61	28.53	32.67	73.59	40.88	35.26	28.07
ARHGEF12	62.23	22.03	66.15	46.12	49.19	50.14	51.98	61.75	56.11	93.41	61.01	61.83	75.54	82.23	78.83	57.62	27.94	56.37	20.25	27.89	34.31	30.36	29.4	24.61	12.34	23.93	38.76	21.73	24.34	38.1	29.23	25.54	28.4	23.81	51.75	53.96	45.03	21.05	66.23	35.6	68.25	30.24	71.05	65.24	33.71	75.14	36.38	64.5	63.99
ARHGEF15	1.92	4.11	2.39	2.48	6.37	2.47	7.83	5.54	3.49	19.56	3.46	2.29	5.4	9.61	8.79	4.54	3.58	5.77	7.84	12.77	7.18	5.43	7.02	2.41	2.24	4.26	2.61	4.01	2.65	3.29	4.84	5.25	2.4	8.53	1.59	4.8	7.32	13.02	20.35	2.02	2.49	7.25	2.4	2.23	13.31	2.59	7.02	7.45	2.19
ARHGEF16	22.15	40.91	30.1	34.22	70.41	16.42	48.67	38.5	30.33	22.05	28.43	25.99	29.63	20.17	38.32	28.17	46.04	30.82	70.27	19.21	48.72	86.19	12.47	16.55	31.57	22.4	57.11	23.76	36.06	64.26	28.61	42.93	36.67	56.62	41.6	68.18	63.3	14.22	39.41	53.32	38.46	27.07	53.78	42.34	15.99	49.31	23.89	12.48	21.39
ARHGEF17	3.2	11.75	11.32	10.21	17.95	12.64	16.47	8.54	11.12	27.28	6.58	7.46	4.5	19.79	14.71	7.47	9.55	8.09	17.58	29.32	8.77	10.14	8.07	7.01	10.56	22.56	4	7.26	5.06	11.07	6.4	7.4	5.82	13.33	11.11	23.31	14.15	16.09	36.2	20.63	7.94	13.51	7.89	9.52	20.25	23.76	13.12	29.53	5.3
ARHGEF18	15.05	30.56	48.07	29.45	26.75	15.05	14.06	21.56	21.6	23.46	30.8	14.68	16.39	15.71	15.24	18.28	34.17	29.49	18.4	33.81	31.17	42.54	29.34	16.04	39.24	17.79	22.99	27.91	28.63	22.77	19.78	28.07	35.14	25.27	91.13	29.12	44.54	36.16	36.81	40.24	46.86	19.03	62.39	41.82	38.84	42.53	31.37	66.38	64.6
ARHGEF19	3.73	7.38	5.91	2.86	11.28	1.88	69.79	6.91	11.02	5.53	2.52	11	3	8.89	6.44	6.99	6.19	19.22	50.7	8.79	7.84	11.53	7.19	17.74	13.79	42.15	9.21	4.21	1.3	13.24	7.11	2.43	2.72	15.55	5.01	32.09	6.78	4.7	7.25	16.72	19.92	5.75	25.07	7.24	4.23	7.56	22.89	21.46	13.98
ARHGEF2	26.94	31.46	42.57	71.99	38.11	38.29	47.01	36.74	60.27	61.47	27.39	36.05	40.47	28.36	42.89	24.53	47.1	28.65	32.95	46.12	39.4	36.57	43.41	22.35	21.2	51.82	17.54	42.86	26.47	34.86	36.33	28.42	24.96	60.47	29.58	35.72	36.97	67.71	64.57	22.32	59.45	31.62	39.82	39.45	62.83	72.46	38.57	59.43	41.28
ARHGEF25	0.84	5.24	5.31	1.99	7.53	2.94	3.38	4.46	11.82	14.16	2.73	2.63	0.72	9.62	10.55	3.73	4.33	8.16	3.32	24.67	4.25	5.34	5.83	10.06	4.47	17.53	1.54	6.51	6.23	3.08	6.46	2.88	3.02	6.48	8.02	14.48	10.9	13.22	19.61	9.97	5.07	5.29	2.32	5.95	12.35	5.67	7.7	19.5	1.58
ARHGEF26	5.46	0.35	3.11	4.6	2.25	0.79	1.47	1.33	5.04	2.97	1.12	6.61	0.23	5.95	4.27	2.62	2.25	7.79	0.23	1.77	3.13	0.98	0.66	0.91	0.18	3.35	1.53	1.53	2.55	1.77	1.29	0.64	0.06	0.56	1.03	1.84	1.45	1.44	1.62	1.82	0.66	0.63	0.18	2.5	3.69	2.41	0.54	6.96	0.16
ARHGEF26-AS1	1.53	2.07	7.1	5.6	3.39	6.73	5.86	4.35	3.7	4.66	2.09	12.02	5.54	4.08	3.99	7.85	2.54	2.52	2.69	2.19	1.47	2.85	2.8	1.38	4.84	2.56	2.08	2.76	2.76	2.09	2.23	1.99	1.67	2.37	3.41	2.84	2.2	2.08	3.24	3.72	3.41	2.33	5.86	5.11	2.17	6.65	4.02	8.07	6.91
ARHGEF28	9.11	7.19	8.4	2.43	6.29	4.66	11.56	10.73	12.01	11.9	2.69	9.71	11.31	17.22	16.61	6.13	10.12	11.24	3.94	11.71	2.3	3.62	5.16	2.08	8.89	5.03	6.79	11.84	3.38	17.49	18.7	5.32	5.78	5.2	6.33	10.12	12.71	3.27	11.4	21.5	5.58	6.07	7.27	9.95	6.64	3.86	4.74	10.29	3.08
ARHGEF3	21.43	10.9	18.24	13.93	16.31	13.97	77.75	11.13	11.88	32.92	14.76	13.95	29.21	24.4	30.34	31.63	15.79	34.13	16.42	13.77	10.91	23.69	16.39	14.64	7.78	10.68	7.71	19.66	4.73	16.2	15.6	12.86	16.67	8.78	22.54	17.28	26.55	21.17	27.37	14.3	22.24	16.99	15.52	19.53	15.87	30.19	36.73	23.85	48.76
ARHGEF3-AS1	0	0	0	0	0	0	0	0	0	0	0	0	0	0	0	0	0	0	0	0	0	0	0	0	0	0	0	0	0	0	0	0	0	0	0	0	0	0	0	0	0.15	0	0	0	0	0	0.3	0	0
ARHGEF33	0	0.02	0.07	0.08	0.05	0.03	0.48	0.17	0.69	0.32	0.1	0.03	0.06	0.2	0.22	4.68	0.05	0.09	0.03	0.06	0.06	0.05	0.06	0	0.07	0.88	0.02	0.14	0.04	0.3	0.06	0.14	0.05	0.04	0.06	0.13	0.17	0.09	0.11	0.1	0.12	0.1	0.03	0.1	0.07	0.88	0.11	0.14	0.04
ARHGEF34P	9.54	4.71	15.67	13.22	9.23	5.86	3.45	18.69	22.61	15.45	7.31	9.57	8.23	1.22	8.91	5.27	6.65	21.14	6.02	3.83	16.09	16.34	1.78	3.78	1.89	11.28	9.01	8.18	5.57	11.74	9.34	13.81	13.5	12.67	13.88	7.85	10.03	6.59	19.26	28.47	7.36	6.65	32.73	24.96	2.03	12.61	4.77	13.18	11.65
ARHGEF35	34.55	27.85	30.73	38.84	35.14	23.44	10.31	31.18	14.94	4.23	27.31	12.21	36.1	9.31	27.25	17.37	22.81	43.9	30.99	11.98	37.63	18.52	6.72	23.12	14.49	45.46	52.44	24.6	37.99	36.44	14.81	15.31	16.46	35.42	73.46	52.62	32.35	3.61	22.01	25.56	23.74	34.5	28.84	45.11	7.09	25.54	20.73	31.78	44.56
ARHGEF37	5.11	4.44	1.56	1.81	4.27	2.5	7.66	3.52	6.41	7.88	2.36	3.63	4.35	2.95	18.54	5.11	12.89	10.92	5.41	5.72	6.04	1.74	5.31	1.58	5.12	3.78	6.29	18.38	5.2	12.09	23.13	2.98	1.01	9.08	3.23	3.86	8.21	5.18	12.48	7.85	7.83	26.91	15.67	4.98	4.24	9.93	5.95	3.89	3.82
ARHGEF38	7.96	3.85	7.2	0.42	20.21	11.56	16.02	5.29	4.66	12.67	2.15	23.6	22.31	11.86	5.78	12.36	2.27	1.34	2.47	6.87	6.29	0.39	11.76	0.83	2.85	8.99	9.15	1.07	2.3	2.75	1.14	3.16	1.76	3.26	14.5	7.49	5.3	1.82	7.15	2.44	7.58	1.28	2.71	9.7	1.56	10.57	0.93	0.9	3.95
ARHGEF38-IT1	0.16	1.07	0.77	0	0.76	1.22	0	0	0.18	0	0.47	3	1.53	0.63	0.18	0.84	0.5	0	0.87	0.23	1.04	0	1.2	0.51	0.89	1.15	2.35	0	0	0.35	0.21	1.17	0.21	0	3.86	0.34	0.44	0	0.7	0.16	0.34	0	0.57	0.47	0	0.35	0.17	0	1.19
ARHGEF39	13.18	15.14	6.99	6.01	14.26	8.75	7.66	27.46	10.8	2.24	8.17	21.9	6.24	5.16	6.37	10.59	10.6	2.26	5.35	4.45	11.94	6.28	3.65	7.38	7.67	8.94	6.33	4.15	2.06	6.48	3.56	4.38	6.46	10.08	3.73	4.51	1.98	4.02	6.3	5.74	44.78	12.56	37.88	9.97	17.1	34.72	8.92	14.17	6.46
ARHGEF4	0.05	0.35	2.16	0.87	1.84	8.82	0.45	2.51	2.3	1.63	0.61	0.64	0.64	2.07	1.94	3.34	0.64	36.06	1.09	3.65	1.03	2.26	0.33	3.41	13.76	1.44	0.65	1.09	0.98	2.3	1.22	1.97	0.14	1.02	18.49	1.67	1.4	1.06	2.28	5.93	3.83	2.78	2.71	1.58	2.28	2.22	0.3	4.32	0.07
ARHGEF40	14.45	7.74	5.51	10.61	38.22	3.97	7.93	16.29	12.35	30.08	19.03	6.62	11.43	14.46	22.78	10.94	9.64	7.69	47.87	34.14	27.94	7.05	7.36	5.83	5.48	7.41	9.77	9.43	6.3	23.67	10.58	11.12	6.35	17.15	9.35	38.45	26.64	22.92	36.5	5.55	10.49	18.78	30.82	23.24	31.66	19.53	12.8	21.79	8.99
ARHGEF5	22.93	21.7	24.37	31.81	18.32	18.39	11.59	28.32	30.19	17.87	17.5	14.37	28.84	7.81	25.1	14.52	20.28	37.4	22.35	17.91	28.78	29.16	9.24	12.71	16.89	50.49	30.19	21.33	31.27	24.08	20.68	23.51	24.58	33.59	23.24	41.67	29.5	11.4	23.14	35.85	18.1	17.17	50.18	41.24	8.87	34.72	18.52	39.84	39.82
ARHGEF6	4.68	4.63	8.34	4.63	6.6	3.37	6.46	9.95	7.3	31.5	9.27	3.62	6.28	10.08	26.67	14.95	11.12	8.98	4.92	7.19	6.56	8.98	10.87	5.56	2.21	2.17	1.99	16.63	5.8	7.34	11.18	8.05	6.38	8.37	3.24	5.84	11.88	19.77	13.98	2.76	2.62	4.36	1.73	8.13	8.32	6.68	16.16	11.46	3.08
ARHGEF7	59.46	16.61	39.17	30.4	30.75	31.07	90.93	22.29	39.08	49.46	23.69	40.73	56.44	33.45	48.23	27.34	19.35	18.47	9.95	27.7	20.55	19.5	17.06	14.63	17.55	26.06	21.78	16.33	17.8	22.27	14.13	13.12	24.87	22.99	26.44	18.23	21.63	19.73	36.15	13.95	35.77	22.38	30.86	40.96	30.07	32.53	22.27	26.9	35.55
ARHGEF7-AS1	0	0	0	0	0	0	0.28	0	0	0	0	0	0	0	0	0	0	0	0	0	0	0	0	0	0	0	0	0	0	0	0	0	0	0	0	0	0	0	0	0	0	0	0	0	0	0	0	0	0
ARHGEF9	8.38	5.81	8.89	1.21	10.06	9.38	9.45	5.82	10.57	12.87	7.09	9.41	9.16	7.91	14.39	5.65	9.26	6.92	3.14	9.29	7.23	2.63	3.06	6.2	5.61	10.98	9.18	6.76	7.1	6.77	6.37	3.99	1.66	9.14	7.71	8.68	11.32	9.36	9.78	4.12	6.36	4.12	7.22	7.47	22.91	18.08	3.45	12.48	12.08
ARHGEF9-IT1	0	0	0	0	0	0	0	0	0	0	0	0	0	0	0	0	0	0	0	0	0	0	0	0	0	0	0.2	0	0	0	0	0	0	0	0	0	0	0	0	0	0	0	0	0	0	0.21	0	0	0
ARID1A	30.17	26.29	36.61	35.91	7.73	39.97	35.02	27.09	41.18	51.46	29.41	44.3	32.12	45.67	51.44	30.78	39	38.8	59.83	24.11	34.04	40.19	33.67	29.52	17.22	36.5	33.8	35.33	26.84	35.95	26.34	29.98	28.61	48.45	24.04	67.13	24.46	40.43	44.61	35.02	41.14	26.57	37.07	40.17	60.14	50.73	40.54	70.21	48.22
ARID1B	19.8	13.96	26.34	13.93	24.56	28.73	18.5	22.59	17.49	25.62	17.45	20.81	13.84	21.25	21.92	23.9	19.51	22.33	20.61	16.21	17.38	19.66	16.84	8.05	10.8	16.9	23.65	17.09	14.98	15.59	13.25	12.62	15.94	19.69	1.66	44.39	21.6	21.37	24.35	11.71	19.93	21.3	27.58	40.36	27.84	37.3	15.7	33.72	8.97
ARID2	12.94	6.97	14.64	10.49	14.4	24.75	25.62	26.94	18.27	17.77	16.14	19.84	22.85	18.7	20.63	18.14	9.19	10.96	7.35	6.79	7.82	11.27	15.54	6.58	5.36	11.74	9.32	9.7	7.23	7.66	6.75	5.72	10.59	11.1	7.08	13.01	11.45	6.46	12.8	2.65	12.08	5.66	10.39	18.41	9.81	19.4	11.63	17.01	17.79
ARID3A	4.27	14.35	28.5	3.91	14.51	4.33	2.27	11.63	3.67	7.43	7.62	6.93	8.11	2.89	3.25	4.42	7.42	5.15	3.67	7.63	7.44	5.07	7.15	2.21	7.26	21.04	6.08	12.39	7.82	4.48	7.72	11.16	11.53	13.02	6.04	19.24	10.86	9.01	8.17	8.48	14.03	6.65	5.02	1.47	18.61	27.9	19.49	105.22	5.57
ARID3B	4.96	16.59	7.62	4.72	11.8	10.61	2.49	21.12	7.11	7.24	10.83	6.67	10.37	2.38	9.83	8.6	21.51	11.5	5.82	11.79	13.42	7.61	9.21	3.97	13.34	27.39	9.3	15.79	14.52	5.61	10.7	11.29	7.54	10.5	3.67	19.53	11.42	9.85	12.93	16.05	7.44	4.7	10.09	11.35	8.5	22.08	10.16	34.02	10.39
ARID3C	0.09	0.07	0	0	0.09	0.11	0.2	0.25	0.2	0	0	0.12	0	0	0	0.17	0.08	0	0.05	0.07	0.13	0.17	0.07	0.08	0	0.28	0.05	0	0.28	0.15	0	0	0.13	0.1	0.17	0	0.22	0.06	0.16	0.14	0.66	0.05	0.11	0.21	0.07	0.48	0.19	0.2	0.38
ARID4A	7.1	5.55	16.67	10.09	5.65	12.88	17.84	17.44	18.32	15.98	12.53	14	21.05	12.41	20.02	12.26	7.99	10	6.57	10.64	6.67	8.25	8.08	4.84	5.08	4.95	5.2	9.71	5.06	6.62	9.86	6.69	7.05	6.07	6.52	6.81	9.05	7.99	10.65	7.35	8.5	8.74	8	9.14	5.14	9.98	18.62	15.7	16.98
ARID4B	14.24	8.9	24.43	15.41	10.75	19.47	17.44	15.67	32.49	20.86	15.88	24.83	23.43	22.29	25.01	23.98	12.34	16.55	8.22	14.08	8.44	12.85	15.12	7.69	6.4	12.59	7.43	12.22	7.82	10.27	11.71	9.74	9.31	10.73	18.22	17.64	18.58	10.65	18.93	15.26	20.69	18.97	12.76	14.09	13.96	33.83	29.03	22.95	26.29
ARID5A	10.19	46.09	17.52	13.27	26.33	9.15	12.83	22.57	12.24	38.45	14.03	7.47	9.24	20.19	22.23	24.3	21.27	29.57	68.5	30.25	22.55	52.58	32.56	19.55	26.18	38.39	15.39	27.24	16.84	20.65	24.12	26.35	33.98	27.04	32.04	41.38	47.09	64.19	43.85	25.09	25.33	17.7	16.57	16.49	32.12	26.82	43.63	33.37	10.71
ARID5B	17.23	12.09	76.43	11.12	20.85	9.42	25.78	35.71	19.27	49.1	50.16	13.43	29.02	27.21	48.74	37.42	13.43	22.72	10.41	22.29	29.99	17.02	12.9	10.64	5.74	18.31	4.89	13.46	7.65	16.61	11.67	11.66	15.04	19.83	13.56	15.16	29.16	30.19	40.33	6.69	18.91	8.95	9.03	21.22	17.15	38.16	35.88	59.69	52.16
ARIH1	22.74	22.03	48.12	30.02	36.23	44.06	56.54	98.01	38.52	48.13	41.71	37.16	61.52	35.69	57.37	68.1	22.37	35.79	18.63	27.66	17.96	24.94	21.61	27.2	14.59	38.12	18.17	17.04	18	14.53	16.71	15.61	22.39	20.9	22.11	34.55	25.52	18.5	32.34	40.56	28.25	18.03	45.27	47.21	24.92	86.35	28.86	39.56	38.68
ARIH2	36.38	16.65	29.46	52.22	34.65	43.25	39.97	26.68	39.79	32.09	30.13	32.31	30.08	42.17	31.9	19.91	30.08	24.53	24.47	14.96	23.57	25.84	25.8	17.8	22.41	23.82	29.28	16.32	12.01	22.86	15.09	14.9	25.8	13.83	14.52	23.46	21.97	20.54	30.78	21.48	31.78	65.5	30.92	46.51	22.9	41.9	29.82	46.34	31.33
ARIH2OS	1.35	2.59	5.68	1.99	5.05	3.97	13.76	1.93	2.32	3.32	1.2	7.64	3.29	2.81	2.14	4.2	2.9	2.66	5.11	4.85	3.07	4.87	3.6	2.88	2.84	3.36	2.44	3.2	2.43	3.38	2.96	4.3	1.96	2.09	2.14	2.2	2.9	2.1	3.74	0.92	3.14	5.82	4.05	3.42	3.75	3.31	5.75	9.3	7.02
ARL1	62.45	38.58	67	51.79	62.05	86.27	61.06	113.4	128.4	85.82	82.24	76.95	69.66	77.75	94.65	77.2	75.38	57.12	39.04	39.55	44.58	30.86	76.17	62.08	23.3	31.69	41.54	33.39	33.98	58.88	46.04	36.58	40.67	43.14	33.45	79.42	67.02	36.14	57.89	57.92	56.29	95.32	37.36	80.79	41.83	117.23	82.01	57.73	62.76
ARL10	0.47	1.16	0.94	2.01	1.89	0.43	1	1.87	3.94	4.16	0.98	0.81	0.86	2.79	1.96	1.78	0.9	2.14	0.51	1.89	0.49	0.63	1.01	1.65	1.25	1.33	0.13	0.8	0.76	1.74	1.27	0.57	0.43	1.06	1.16	1.44	1.52	3.23	3.92	0.85	2.94	1.51	1.78	3.69	3.2	3.35	1.75	4.93	0.45
ARL11	4.48	1.69	2.73	0.76	1.16	0.49	0.72	1.27	2.9	3.68	1.63	0.63	1.16	1.09	1.54	1.5	1.04	2.45	2.05	0.81	3.4	2.42	4.28	1.24	1.67	2.75	0.25	2.13	0.61	3.29	1.75	1.94	2.01	2.16	1.36	0.8	2.33	4.18	1.81	0.84	5.24	0.47	0.35	7.68	4.4	4.4	3.51	5.32	0.27
ARL13A	0	0.12	0	0.08	0.07	0.04	0.2	0.08	0.06	0.21	0.09	0.06	0.2	0.16	0.15	0.24	0	0.06	0.04	0	0.05	0.06	0.16	0	0.05	0	0	0	0.33	0	0	0.1	0	0.16	0.19	0.08	0.07	0	0.08	0.95	0.44	0	0.13	0.11	0	0.05	0.04	0.27	0.07
ARL13B	10.85	3.03	7.63	11.53	3.46	6.54	7.69	7.61	13.1	10.74	7.34	12.76	7.06	15.67	11.87	16.71	4.76	5.85	2.78	6.54	4.3	4.77	1.92	9.4	4.21	12.38	6.49	1.84	2.78	6.24	2.64	2.75	2.52	3.51	4.45	4.78	8.63	4.49	6.71	8.69	8.12	5.34	2.6	8.46	4.96	11.42	5.13	9.53	1
ARL14	8.75	80.62	21.21	65.66	14.81	32.2	0.06	30.62	15.66	279.75	9.48	26.18	54.96	10.06	87.5	60.34	139.79	18.47	6.46	52.69	20.35	2.79	18.61	0.49	31.94	0.06	34.09	59.19	170.77	19.24	39.5	65.16	18.92	6.61	64.6	17.21	21.83	9.52	57.7	11.33	14.6	11.22	9.55	19.62	1.71	1.27	6.28	1.53	8.64
ARL14EP	19.16	7.89	21.88	17.81	12.23	21.55	15.96	15.43	24.9	22.8	21.59	20.12	26.16	24.1	28.63	22.56	13.52	13.29	8.05	11.11	11.35	14.78	24.05	14.3	6.36	9.02	11.01	14.8	6.56	11.99	15.08	7.93	10.61	9.3	11.77	24.2	13.44	14.1	18.21	17.52	9.92	13.2	14.63	11.89	15.13	19.04	21.59	18.17	17.1
ARL14EPL	0	0	0.35	0.86	0	0	0	0.11	0	0	0	0	0	0	0	0	0	0	0	0	0	0	0.15	0	3.48	0.15	0	0	0	0	0	0	0	0	2.35	0	0	0.12	0	3	0.11	0	0	0	0	0	0	0.55	0
ARL15	7.15	7.41	12.68	5.9	9.04	18.51	19.89	17.91	10.63	30.49	15.23	8.61	17.52	22.09	27.29	20.56	6.77	11.34	4.95	9.67	15.19	4.79	6.68	6.05	3.57	7.67	7.33	5.93	9.01	13.47	7.81	6.4	7.6	9.83	13.22	8.03	15.71	10.01	19.47	6.94	6.93	9.07	8.76	9.46	20.3	7.37	11.15	16.87	9.92
ARL16	18.42	20.97	19.71	10.82	23.22	27.92	103.71	21.63	31.94	20.69	19.85	24.28	27.88	43.68	18.91	26.45	11.84	19.74	17.71	25.77	15.72	15.91	30.33	19.89	45.47	35.84	18.16	20.57	9.89	28.79	13.02	13.94	27.64	21.14	34.24	26.27	26.37	20.68	20.63	11.54	9.9	18.8	19.67	12.49	15.36	38.64	23.96	11.93	19.54
ARL17A	13.07	7.93	13.63	23.22	13.98	9.98	41.02	8.27	13.63	19.28	9.97	28.75	19.93	18.25	17.34	39.09	6.45	6.67	8.57	10.5	8.41	7.51	8.16	5.57	9.64	17.49	7.27	13.32	4.18	9.55	10.78	4.34	7.47	5.34	7.52	10.6	8.46	8.43	12	13.79	13.17	6.72	11.89	14.32	6.98	17.37	15.95	16.99	16.42
ARL17B	12.65	13.85	4.34	2.75	9.19	5.73	0.38	6.01	6.28	4.37	8.83	6.41	4.37	3.19	8.21	20.37	6.4	6.48	12.85	13.27	12.42	7.89	8.22	13.41	16.71	30.12	10.5	3.3	2.8	15.14	6.36	8.75	9.21	5.66	7.56	12.26	5.04	11.36	5.82	15.23	10.83	6.28	21.92	14.1	7.6	5.11	4.71	14	8.14
ARL2	124.02	183.57	106.01	98.33	178.52	50.87	168.54	100.06	61.65	120.42	62.93	92.1	103.07	81.39	110.97	87.37	83.09	105.27	232.32	252.31	127.86	97.42	189.14	162.85	429.77	114.46	134.7	106.8	115.78	156.89	140.63	96.71	168.87	185.89	176.06	337.46	153.86	229.65	143	251.07	208.58	98.54	130.07	119.46	253.73	96.8	136.85	104.57	148.15
ARL2-SNX15	0	0	0	0	0	0	0	0.26	0	0	0	0	0	0	0	0	0	0	0	0	0	0	0	0	0	0	0	0	0	0	0	0	0	0	0	0	0	0	0	0	0	0	0	0	0	0	0	0.4	0
ARL2BP	59.03	48.23	49	58.55	64.85	61.39	109.36	48.24	74.62	112.23	68.04	70.64	64.89	73.69	79.41	101.65	51.75	70.76	26.61	83.21	52.42	62.09	101.8	59.05	34.58	115.35	42.51	43.5	32.23	46.22	50.12	35.56	46.58	55.12	47.93	113.76	134.51	71.28	82.48	74.22	44.31	41.89	46.88	74.13	46.14	55.29	63.28	70.92	41.74
ARL3	6.64	5.75	8.02	9.93	7.01	8.71	22.62	7.28	8.17	16.39	7.52	9.3	9.06	14.16	14.6	21.47	7.17	5.49	9.36	13.56	8.66	8.28	12.4	6.57	9.52	16.49	9.24	8.65	7.34	18.98	10.4	4.82	7.96	9.37	16.59	13.9	9.15	10.71	10.96	16.06	8.41	10.61	5.7	11.4	17.44	12.72	12.21	11.31	8.23
ARL4A	38.74	15.12	36.59	38.91	11.02	33.47	17.92	18.45	31.69	21.62	27.65	26.08	51.82	47.33	21.75	73.33	9.44	21.06	15.88	10.67	14.82	14.53	21.61	17.29	8.77	39.18	11.83	5.09	34.85	7.18	9.36	16.12	9.29	14.99	14.44	14.58	14.51	12.61	16.54	11.76	24.52	8.31	38.18	23	12.41	32.89	16.94	9.05	17.83
ARL4C	7.6	32.85	51.88	27.22	23.7	20.62	40.27	20.87	18.31	45.47	25.74	13.49	8.98	59.64	31.63	29.99	19.14	44.85	29.98	34.18	16.18	30.43	19.22	18.25	142.09	74.06	5.65	17.59	6.13	10.67	19.41	22.27	15.67	14.13	20.95	35.37	45.56	54.02	27.18	139.4	6.23	8.01	43.52	18.67	42.6	39.45	38.13	40.2	71.15
ARL4D	0.33	2.09	2.27	1.57	2.5	1.9	1.32	1.51	4.74	3.18	0.69	2.04	0.45	7.84	2.05	7.3	1.85	82.64	1.1	4.92	1.12	1.76	1.04	5.77	0.79	10.17	2.21	1.07	2.14	1.55	3.39	1.43	0.81	1.44	8.23	7.52	2.91	6.39	3.22	1.45	1.15	2.03	0.3	1.23	5.16	1.8	1.68	4.51	7.75
ARL5A	56.73	27.4	49.99	44.04	32.82	64.72	38.37	43.23	38.33	46.57	62.39	49.44	45.28	35.34	43.15	56.12	29.58	46.23	20.54	26.41	15.7	22.77	28.49	34.69	16.79	18.45	27.74	24.31	28.1	20.09	29.6	19.01	26.17	18.05	37.29	33.55	41.47	20.29	37.56	24.79	28.23	15.67	44.23	41.43	25.88	62.06	42.71	46.92	50.08
ARL5B	46.55	9.02	45.52	34.09	16.19	21.9	13.98	61.33	22.97	24.2	50.1	40.78	21.95	12.95	23.43	39.57	14.81	30.71	5.88	7.69	13.93	9.94	8.21	12.61	8.13	23.32	8.89	6.57	23.06	7.26	5.46	13.19	12.49	14.04	15.73	11.52	8.14	9.03	24.77	18.56	24.97	11.68	13.98	26.48	20.83	40.91	7.86	49.56	32.34
ARL5C	0	0	0	0	0	0	0	0.07	0	0.07	0.06	0	0	0	0	0	0	0	0	0	0	0	0	0.1	0	0	0	0	0	0	0	0	0	0	0	0	0.06	0	0	0	0	0	0	0.1	0	0	0.06	0	0
ARL6	6.57	3.39	4	4.93	3.48	5.17	5.68	5.87	6.88	6.78	3.6	6.52	6.13	9.52	7.65	9.5	2.1	4.52	1.13	3.43	1.72	0.67	3.92	3.78	2.91	7.45	3.76	2.87	2.51	2.9	3.35	2.02	1.43	3.2	2.6	4.26	5.71	3.66	5.29	6.37	3.78	3.08	2.43	4.85	4.78	8.77	3.02	6.36	4.43
ARL6IP1	341.77	178.02	663.5	430.59	363.91	366.54	339.28	377.31	749.35	330.36	362.48	436.28	347.48	511.43	398.65	338.42	290.22	163.7	236.8	472.08	338.56	211.4	153.7	211.85	183.13	353.5	388.07	138.66	143.44	307.17	189.28	155.63	172.36	228.26	353.31	224.82	222.11	140.11	316.34	261.72	519.91	505.35	310.17	682.75	854.12	207.46	248.78	240.34	270.87
ARL6IP4	62.4	235.53	80.88	122.59	154.37	66.64	100.5	90.46	100.78	90.83	108.78	76.99	81.91	75.32	158	107.12	175.05	119.02	127.77	192.65	206.38	200.72	227.9	165.83	244.55	173.15	203.04	185.99	194.15	231.64	176.8	158.02	174.25	237.32	224.83	129.99	212.43	233.9	147.17	281.72	123.56	255.48	227.56	134.32	189.52	111.24	144.95	140.3	161.77
ARL6IP5	228.95	133.06	199.73	209.48	157.4	213.27	562.69	123.21	118.52	329.16	217.04	110.33	133.87	207.45	221.22	212.36	121.61	111.29	79.1	144.63	95.28	146.11	159.27	153.5	144.9	84.66	119.4	126.79	110.14	97.03	109.71	98.06	135.36	86.2	114.39	310.24	127.64	188.09	190.91	174.76	80.36	69.01	62.74	215.56	108.06	61.72	166.37	153.13	94.63
ARL6IP6	30.71	20.49	31.64	32.65	24.31	34.11	24.35	20.77	39.98	20.25	31.71	42.5	32.99	20.58	19.87	46.09	10.9	18.62	13.34	11.21	9.02	15.39	18.29	18.66	20.32	21.11	14.91	12.66	6.31	10.59	10.58	8.55	15.69	10.02	23.62	13.77	10.04	9.47	15.97	36.87	17.37	8.48	24.12	21.65	12.82	39	18.97	19.07	30.31
ARL8A	83.06	105.64	62.51	55.86	72.05	36.1	66.21	61.95	75.1	74.75	94.79	40.36	61.18	34.02	53.15	54.81	51.76	76.32	91.93	84.24	77.49	91.23	64.75	129.47	66.72	135.73	64.29	55.84	59.8	71.27	50.22	69.85	72.22	76.59	112.03	125.46	108.6	91.24	89.44	57.35	120.57	94.62	101.9	62.85	114.76	206.87	77.48	52.2	78.91
ARL8B	99.05	38.77	75.08	76.86	79.69	86.83	82.7	61.57	64.43	104.67	93.97	70.88	91.24	104.34	92.66	115	45.99	124.75	38.84	49.84	54.1	50.76	30.86	71.35	62.37	36.24	35.81	34.55	30.64	47.32	37.53	39.52	43.19	42.24	60.91	112.24	58.48	43.21	75.01	48.65	54.06	76.63	47.2	90.29	50.68	118.22	62.81	84.62	77.07
ARL9	0.07	1.02	4.64	2.45	12.35	2.23	0.52	8.49	6.59	2.51	0.81	13.19	1.86	1.46	0.47	5.67	0.24	0.63	0.49	4.27	1.28	0.55	9.92	2.51	5.09	2.17	6.31	0.94	0.88	1.19	0.3	0.28	9.68	6.38	6.17	1.58	0.62	2.83	7.41	2.33	0.79	4.2	0.53	1.22	1.28	5.11	1.79	1.41	0.07
ARMC1	61.1	22.83	44.62	30.36	40.61	43.95	52.04	28.18	50.93	34.36	38.03	34	42.57	47.82	33.16	44.54	24.6	23.62	37.71	18.45	22.77	19.34	24.9	19.15	70.95	39.07	41.7	13.88	16.99	23.83	14.62	14.35	15.96	54.14	32.32	28.6	20.45	16.24	32.11	29.64	22.05	29.74	43.29	52.19	28.95	78.06	26.9	29.26	29.12
ARMC10	140.63	47.81	40.95	96.07	46.11	57.35	38.66	50.79	27.28	43.34	61.56	72.65	75.26	36.09	49.28	72.13	29.69	33.89	42.44	38.25	32.37	50.86	38.13	41.08	58.3	51.58	55.45	17.26	14.92	31.52	23.7	19.33	30.64	37.03	64.96	72.58	48.31	30.94	45.61	83.25	342.35	292.65	85.63	59.67	27.4	39.71	52.47	51.2	56.64
ARMC12	0.1	0.29	0.17	0.33	0	0	0.15	0.32	0.27	0.51	0.09	0.13	0.06	0.1	0.39	0.9	0.09	0.06	0.06	0	0.09	0	0.31	0.41	0.15	0.15	0.06	0.41	0	0.22	0.07	0.1	0	0.32	0.7	0.11	0.05	0.38	0.06	0.16	0.33	0	0.06	0.08	0.16	0.23	0.41	0.11	0.2
ARMC2	11.44	0.96	1.62	1.19	1.24	0.84	2.67	2.99	0.98	2.19	0.8	2.81	3.58	1.5	5.77	5.31	0.85	0.98	0.9	0.65	0.4	0.76	0.74	0.52	0.92	1.4	0.99	1.2	0.75	0.82	1.43	1.06	1.09	1.4	1.89	1.59	1.27	0.88	1.12	1.75	1.5	2.46	3.83	2.82	2.37	1.89	1.27	2.7	1.12
ARMC2-AS1	0.17	0	0.1	0	0.09	0.21	0	0.29	0.1	0	0.08	0.11	0.2	0	0.19	0.32	0	0	0	0	0	0	0	0	0.08	0	0.19	0	0	0	0	0	0	0	0	0	0	0	0.2	0	0	0.09	0.11	0	0.14	0	0.18	0.19	0.45
ARMC3	0	0.09	0.14	0.79	0.17	0.24	0.43	0.21	0.49	0.22	0.15	0.87	0.77	0.06	0.04	14.3	0.11	0.37	0	0.59	0.01	0.03	0.34	0.18	0.11	3.59	0.26	0	0	0.07	0	0.13	0.03	0.07	0.29	4.01	0	0	0.04	28.4	0.12	0.02	0.16	0.91	1.2	0.3	0.02	0.95	0.04
ARMC4	0.04	0.04	0.16	0.09	0.06	0.05	0.49	0.2	1.09	0.21	0.03	1.23	0.06	0.88	0.17	9.84	0.05	0.16	0.02	0.34	0	0.03	0.07	0.42	0	1.43	0.12	0	0	0.02	0.04	0.12	0.06	0.02	0.22	0.23	0.08	0.32	0.24	0.03	0.11	0.07	0	0.37	0.24	0.17	0.01	0.91	0.04
ARMC5	3.51	8.04	5.96	4.65	13.56	4.43	5.91	7.27	7.3	7.26	3.78	4.98	3.55	4.31	3.21	4.32	10.29	10.23	7.47	11.84	13.51	8.32	13.81	6.41	8.25	16.83	21.28	6.74	7.29	10.66	7.9	4.87	8	13.28	13.53	12.73	10.84	12.51	12.81	6.78	9.02	11.82	18.07	9.77	13.38	26.36	9.2	17.55	12.71
ARMC6	13.53	31.32	16.58	19.56	33.46	17.16	22.38	20.14	20.93	16.99	16.63	15.65	15.16	11.3	11.89	23.37	24.32	21.72	42.7	28.82	38.49	24.48	56.56	19.79	36.64	31.24	47.14	16.93	12.55	22.22	16.38	18.48	29.95	141.89	44.9	20.9	44.15	27.48	32.6	30.98	57.04	21.49	56.26	28.3	29.67	28.36	28.6	33.91	39.34
ARMC7	9.77	53.01	11.68	10.3	49.12	19.82	74.13	13.16	46.41	16.03	20.57	16.13	8.61	30.03	25.39	17.27	22.05	18.8	42.66	30.75	27.5	41.09	29.56	18.01	25.24	51.75	52.02	30.65	23.26	37.08	27.31	25.04	30.15	26.9	32.35	49.88	46.19	25.28	29.39	25.26	14.13	29.79	33.11	20.26	16.77	17.71	21.49	23.45	31.58
ARMC8	25.51	14.85	18.15	22.05	22.18	23.28	26.51	25.01	25.12	23.95	21.29	19.22	19.35	20.76	32.7	28.03	16.14	21.76	10.74	10.72	12.05	11.08	9.89	11.67	10.62	23.76	15.45	10.26	8.89	16.35	9.95	9.2	12.37	14.29	16.28	30.91	19.76	10.45	19.83	14.61	14.66	14.39	11.74	30.8	11.63	25.92	20.67	18.8	22.72
ARMC9	2.41	10.4	9.16	10.63	12.32	7.36	8.83	10.65	12	19.31	9.35	6.93	10.42	19.26	10.8	12.06	5.75	3.17	4.3	17.12	6.37	6.56	5.24	4.07	7.84	9.73	6.08	2.78	0.93	6.25	3.18	3.15	5.6	6.05	10.78	14.22	28.68	7.15	16.3	19.52	8.31	8.85	3.08	10.89	13.25	11.03	8.82	19.95	6.84
ARMCX1	2.23	4.24	4.58	2.3	3.99	2.61	3.73	4.94	34.8	16.67	5.89	5.13	3.38	10.68	14.26	15.44	4.75	5.63	2.35	10.82	3.34	2.86	3.69	7.76	2.52	22.22	0.94	4.39	4.08	1.83	5.74	3.52	2.89	4.25	9.86	8.9	5.97	11.12	10.09	4.09	2.82	17.52	1.04	3.15	16.48	2.73	7.2	9.09	1.28
ARMCX2	3.21	5.62	4.3	2.8	7.74	3.65	3.77	3.79	35.01	23.12	6.7	3.88	2.58	11.79	14.88	11.09	10.32	5.83	3.71	13.02	4.29	3.66	4.63	31.92	3.33	46.11	0.77	7.02	3.04	4.86	7.39	4.39	2.58	6.48	4.53	12.35	14.06	14.58	14.16	5.54	3.12	8.01	1.61	4.98	13.51	3.48	7.71	11.84	1.8
ARMCX3	48.93	16.04	29.39	18.32	27.68	39.85	7.62	11.16	51.71	48.65	32.36	34.37	31.37	77.04	40.3	39.79	30.89	10.81	12.95	23.57	18.6	6.47	11.57	32.19	10.94	48.31	14.94	17.48	9.74	19.93	21.73	15.35	8.07	9.5	36.17	36.18	46.83	23.02	21.17	33.66	20.56	34.2	2.99	20.47	30.86	35	30.7	14.01	22.56
ARMCX4	1.5	0.63	1.97	0.82	1.15	2.1	2.19	1.27	4.04	3.72	0.35	1.82	3.39	2.87	3.74	1.23	1.4	1.33	1.66	2.58	0.94	0.33	1.64	0.32	0.94	4.77	1.06	1.11	0.77	1.64	1.07	0.51	0.19	0.95	2.48	1.88	3.09	1.59	3.36	1.72	1.99	2.14	3.32	2.39	4.21	3.47	1.51	2.54	1.7
ARMCX5	26.61	9.68	18.56	12.76	15.11	16.25	20.74	15.28	21.99	16.38	13.71	12.76	18.35	20.06	14.67	14.54	17	12.14	11.91	9.13	13.19	1.83	7.95	9.38	7.82	17.73	19.11	8.3	5.6	11.46	9.1	9.62	7.11	12.72	22.61	15.14	16.22	12.37	12.64	14.57	12.62	13.01	29.31	13.67	9.71	16.43	12.41	10.38	17.78
ARMCX5-GPRASP2	1.03	1.12	2.64	2.14	1.28	2.46	2.1	2.07	4.55	3.55	1.89	1.9	1.41	2.27	2.91	1.64	2.39	2.37	0.67	1.63	1.49	0.54	0.98	2.85	1.25	4.34	1.37	0.61	0.89	1.47	0.8	0.6	0.87	2.06	2.53	2.68	3.68	2.03	3.35	2.12	1.15	1.39	2.53	1.97	3.37	5.65	1.76	2.04	2.12
ARMCX6	65.5	26.91	32.98	27.25	30.3	63.29	8.68	13.01	58.63	46.82	37.24	42.46	69.25	60.34	48.21	58.46	33.72	29.29	33.42	52.47	26.25	15.59	28.95	59.55	33.86	74.43	35.98	39.43	15.6	32.89	39.32	28.68	20.33	16.06	71.44	65.19	57.73	48.06	18.36	47.57	24.07	27.82	3.27	18.42	53.12	30.56	56.31	13.26	29.4
ARMS2	0	0	0	0.14	0	0.35	0.53	0	0	0.09	0.14	0.47	0.08	0.43	0.16	0.63	0	0	0.25	0.11	0	0.37	0	0.24	0.36	0	0	0	0	0	0	0.14	0	0	0.09	0	0.07	0	0.08	0	0.08	0	0.27	0	0	0	0.08	0.56	0.31
ARMT1	48.46	10.54	36.78	30.7	22.18	33.43	12.99	31.9	33.57	30.02	42.27	36.98	25.28	18.85	27.56	38.78	24.15	13.47	20.34	10.84	21.05	16.82	15.72	23.05	18.62	9.27	21.55	9.47	14.56	20.88	15.22	12.11	22.49	12.86	30.38	26.36	19.41	11.75	25.87	15.84	16.49	18.49	35.49	32.96	16.27	52.44	15.96	31.61	23.9
ARNT	21.42	15.52	24.94	22.49	30.18	18.25	41.2	63.89	37.17	43.8	25.78	35.49	25.51	45.38	43.78	25.67	15.62	24.03	27.48	17.39	15.61	20.71	12.14	12.66	15.81	28.63	20.83	14.62	16.88	20.94	17.18	15.13	13.57	17.77	20.56	37.35	29.18	24.17	28.46	17.37	22.09	30.68	15.79	24.25	35.74	88.23	32.85	37.07	19.13
ARNT2	0.32	1.56	2.63	0.78	5.25	1.12	158.43	1.75	3.51	5.15	2.37	5.77	0.81	6.42	4.01	21.96	4.24	1.46	6.15	14.16	0.59	8.04	21.71	1.85	0.86	13.17	0.76	2.9	1.46	3.09	3.69	1.05	0.32	1.84	12.78	2.29	2.68	4.02	2.97	0.84	0.95	7.76	6.01	4.27	32.95	1.84	11.67	4.9	0.59
ARNTL	13.87	7.19	9.48	9.85	9.96	5.52	14.08	8.12	12.66	24.94	16.42	8.2	14.26	17.63	27.42	9.94	14.41	6.27	6.65	5.62	13.13	7.93	12.73	16.32	3.53	6.44	3.68	5.75	10.94	11.1	9.82	7.37	8.49	8.71	3.8	9.53	7.85	9.84	11.87	6.89	4.26	5.58	5.41	8.18	7.92	9.15	8.41	11.88	7.02
ARNTL2	9.24	11.43	19.13	19.31	8.93	37.22	1.19	12.03	6.99	12.12	15.02	18.32	11.88	9.62	7.9	13.45	12.03	22.04	6.38	7.94	7.08	19.23	15.94	11.29	38.18	6.65	7.44	6.42	1.79	4.84	5.44	6.94	12.47	4.22	12.18	13.52	11.92	5.08	20.17	34.04	9.39	7.04	7.36	16.48	6.83	5.74	12.42	17.29	15.3
ARNTL2-AS1	0	0.1	0.08	0.14	0.07	0.35	0	0	0	0	0.14	0	0.08	0	0	0.18	0	0.32	0	0	0	0	0.34	0	0.5	0	0	0	0	0	0	0	0.2	0	0	0.08	0	0	0.08	0.08	0.16	0	0	0	0	0.08	0.08	0.08	0
ARPC1A	434.38	146.96	153.89	379.12	161.97	255.7	81.41	200.25	169.76	206.88	188.43	275.7	316.91	139.15	305.76	163.5	329.29	159.65	194.33	153.57	191.16	149.03	102.28	122.66	289.16	279.07	286.71	165.02	180.96	184.28	210.67	127.56	156.93	216.47	273.11	537	657.46	123.91	168.3	384.89	213.68	205.57	172.78	277.37	120.48	113.86	142.68	148.69	196.58
ARPC1B	542.17	612.58	230.85	649.13	312.34	176.72	90.56	228.29	113.23	355.31	316.13	184.44	362.76	207.9	238.02	173.91	216.55	132.35	481.51	411.54	311.82	416.56	168.25	241.19	560.35	329.21	348.86	184.51	300.73	438.48	190.73	353.22	264.81	494.32	601.36	619.58	1983.98	568.22	424.27	511.69	394.13	238.82	457.64	549.72	279.33	190.53	346.06	218.13	69.85
ARPC2	452.55	444.11	709.91	911.48	433.12	467.3	538.14	580.24	442.25	585.57	602.92	254.46	445.54	383.8	469.89	612.37	554.77	752.18	320.76	463.41	492.21	414.36	343.29	448.92	426.99	268.42	337.55	437	410.04	379.25	417.04	440.43	517.09	338.78	493.34	434.66	448.85	480.95	526.52	369.31	338.78	289.05	282.55	405.62	443.98	316.03	480.57	422.92	468.55
ARPC3	533.64	520.15	627.31	588.16	398.14	539.85	249.02	627.29	490.51	594.98	709.71	497.27	657.59	444	589.51	670.39	375.43	488.74	318.81	413.69	471.79	413.9	551.89	665.56	438.62	241.54	315.28	448.51	476.17	634.01	526.01	432.36	673.04	484.01	772.3	488.21	455.79	484.87	471.13	541.64	502.83	476.2	374.36	659.87	357.59	499.27	602.67	531.37	685.39
ARPC4	103.55	220.01	124.05	152.62	217.04	108.54	138.66	113.67	89.94	142.66	155.69	79.89	116.43	119.29	107.24	142.58	224.24	163.69	197.1	251.91	215.53	241.05	162.88	309.4	342.9	229.82	201.83	187.43	188.16	213.84	177.09	214.4	225.18	194.74	384.39	303.56	189.98	253.9	277.5	135.99	167.1	327.68	177.14	224.46	202.53	228.35	189.5	189.49	135.2
ARPC4-TTLL3	0.79	0.74	1.81	1.78	0.96	1.46	6.77	2.05	1.71	3.68	0.76	1.18	2.71	2.66	1.54	3.72	1.6	1.26	1.3	2.32	0.61	1.26	1.48	0.27	0.92	1.18	0.13	0.89	0.3	2.23	1.24	0.93	0.55	0.69	3.14	1.25	1.37	1.58	2.68	1.46	2.56	1.04	1.27	1.62	2.56	2.42	1.56	1.54	0.82
ARPC5	331.81	221.63	273.62	241.05	168.16	257.58	156.68	216.39	230.88	302.54	280.1	280.69	375.74	204.26	262.82	245.08	125.73	171.59	133.39	162.47	210.56	182.9	170.87	168.1	98.27	195.93	126.95	98.53	130.13	131.7	110.09	124.12	185.91	199.24	247.14	252.39	221.32	167.88	231.25	128.94	275.72	138.28	153.56	240.12	246.81	319.82	245.31	166.68	245.32
ARPC5L	111.19	118.31	119.83	123.9	96.5	81.85	103.53	93.39	75.36	72.56	94.97	150.95	85.96	96.56	81.05	124.14	110.17	135.7	103.47	74.5	99.8	117.29	75.87	103.76	100.26	152.08	109.78	78.02	61.19	101.32	83.04	95.1	104.54	104.93	56.45	64.44	70.41	67.08	94.97	47.82	107.16	65.63	182.86	74.19	81.31	108.08	112.41	110.15	113.22
ARPIN	10.37	11.33	19.66	7.65	19.52	10	30.62	61.28	13.69	30.62	15.42	15.52	29.11	17.94	34.07	13.22	7.17	13.4	15.24	24.45	31.29	18.94	9.68	6.53	15.11	19.12	13.67	8.44	13.76	37.75	12.26	10.44	8.74	9.07	17.11	25.61	14.08	19.39	20.76	14.31	14.78	12.29	11.68	27.42	27.47	32.57	22.59	23.62	10.43
ARPP19	68.64	47.51	70.5	66.11	60.59	131.25	95.03	54.85	93.47	93.15	101.97	66.17	111.37	106.75	111.85	90.52	58.63	60.77	31.94	37.14	51.05	58.59	48.62	57.63	49.39	126.03	53.18	34	33.19	24.81	37.94	33.3	61.25	33.54	72.94	40.61	59.29	37.8	90.48	64.78	56.18	34.47	56.65	115.02	77.71	64.85	57.69	117.24	121.08
ARPP21	0	0	0.02	0	0	0.04	0	0.02	0.02	0	0.01	0	0	0	0.03	0.03	0	0.02	0	0.05	0	0	0	0	0.06	0	0	0	0.05	0	0	0	0.02	0.03	0	0.02	0	0	0.07	0	0	0.33	0	0	0	0	0	0.02	0.01
ARR3	0	0	0	0	0.04	0	0	0	0.05	0	0.04	0	0	0	0.04	0.05	0	0.05	0.1	0.13	0	0	0	0	0.04	0	0	0	0.13	0	0	0	0	0	0.05	0	0	0.11	0	0.04	0.14	0	0	0	0.14	0.05	0	0	0.04
ARRB1	11.07	13.1	24.52	27.63	26.14	4.99	9.49	24.11	10.47	29.02	11.69	13.19	17.22	14.07	29.23	5.2	18.73	7.36	14.72	20.23	44.04	12.11	8.92	5.23	4.13	5.95	43.67	19.42	23.46	22.17	23.18	13.68	10.12	25.69	12.9	28.33	11.93	32.38	36.15	6.66	29.69	22.33	40.78	27.2	22.43	5.9	17.64	15.45	7.76
ARRB2	54.65	56.79	41.19	51.78	72.38	22.27	31	77.63	103.38	121.09	63.57	36.51	41.12	57.98	81.84	39.76	45.18	26.42	220.57	40.87	91.58	89.77	53.34	43.73	41.77	49.21	99.3	59.69	83.27	120.17	43.96	67.8	57.43	82.48	46.88	56.96	57.66	135.02	67.39	45.37	42.82	61.49	44.44	89.48	117.13	33.04	81.47	75.87	28.36
ARRDC1	53.07	159.58	52.23	51.24	128.6	48.95	55.96	58.64	37.99	49.15	49.17	72.07	72.25	68.39	50.33	82.88	84.75	73.73	230.76	98.71	86.9	81.38	35.05	76.42	94.02	119.72	99.76	60.41	38.86	101.09	75.63	116.98	86.18	85.71	81.99	94.24	67.19	64.05	76.55	158.34	284.84	90.36	144.35	69.91	53.4	55.62	72.71	65.96	85.1
ARRDC1-AS1	6.71	8.76	7.15	5.78	9.17	4.04	30.19	8	9.56	7.31	5.37	14.8	5.89	9.37	13.09	9	10.17	5.49	20.75	12	12.78	6.19	8.71	8.5	9.71	37.4	6.29	7.84	7.93	18.97	9.76	8.05	7.42	13.72	6	6.5	8.41	9.48	8.22	11.1	23.02	7.96	14.46	9.89	21.14	9.67	9.4	11.75	9.99
ARRDC2	8.61	24.96	16.9	15.18	17.61	13.52	24.94	28.99	25.68	30.85	16.3	10.91	19.36	16.03	23.79	24.46	21.27	18.62	33.6	28.43	24.4	35.85	41.04	20	18.2	7.96	30.31	20	9.04	26.35	28.66	33.04	20.86	84.23	30.93	12.49	29.01	30.65	35.85	11.37	23.27	17.48	28.59	15.6	29.68	22.08	20.47	19.35	18.11
ARRDC3	20.94	21.86	44.85	29.38	50.52	38.73	29.33	37.96	45	88.72	31.42	32.11	28.4	82.53	56.72	60.16	17.48	51.83	14.21	26	13.58	19.47	10.75	22.33	17.56	25.21	13.71	11.64	10.63	11.3	14.12	30.99	22.48	23.96	83.06	40.76	39.07	30.67	60.53	32.44	11.1	27.27	9.35	21.88	19.15	24.07	40.23	63.5	15.87
ARRDC3-AS1	0.85	0.68	2.97	1.65	0.83	3.35	3.02	2.14	2.14	2.37	1.03	5.72	2.64	2.01	2.31	3.77	0.8	0.76	1.08	1.4	0.7	1.63	1.05	0.62	1.09	2.22	0.96	0.76	0.53	1.1	1.01	1.02	0.97	0.78	0.74	1.06	0.66	0.45	1.12	1.17	1.12	0.56	1.47	1.03	0.74	1.33	1.69	3.43	2.14
ARRDC4	2.42	6.17	14.36	8.23	13.42	11.26	30.07	25.29	19.14	25.93	43.13	10.22	21.42	27.94	27.24	23.77	11.72	11.62	4.6	21.69	12.46	11.44	11.95	4.37	3.51	5.33	12.53	20.94	20.48	18.81	17.69	8.91	5.53	5.04	17.95	11.28	19	18.45	16.73	4.08	8.6	12.21	10.55	34	18.28	9.41	22.59	35.56	1.45
ARRDC5	0.03	0.39	0.86	0.06	0.1	0.35	0.24	0.32	0.11	0.69	0.15	0.42	0.33	0.1	0.63	1.44	0.39	0.44	0.23	0.05	0.22	0.99	0.91	0	0.13	0	0	1.05	0	0.15	0.37	0.07	0.23	0.22	0.17	0.07	0.55	0.74	0.23	0.04	0.19	0	0.25	0.21	0.05	0.08	1.57	0.75	0.14
ARSA	9.78	21.48	8.92	13.06	23.65	9.89	30.27	19.43	10.07	20.33	17.73	4.34	15.98	13.7	10.5	16.19	14.58	26.93	39.17	34.7	28.9	26.54	20.57	37.09	20.72	74.06	10.6	36.17	38.37	24.18	28.42	49.63	30.45	23.85	13.55	92.95	33.4	42.86	34.71	5.98	23.73	25.46	37.57	22.38	60.51	14.06	34.02	23.45	14.35
ARSB	2.22	5.14	7.61	5.98	8.91	4.91	7.39	8.1	8.39	20.37	9.28	5.47	4.43	12.34	9.44	9.36	6.36	3.7	6.08	8.49	7.21	9.67	7.98	5.89	3.41	11.95	4.27	4.9	2.76	4.1	5.87	5.57	5.57	7.11	6.34	29.34	14.33	12.55	14.44	10	5.09	4.14	2.8	9.38	16.78	10.06	12.57	25.2	4.77
ARSD	58.91	14.85	10.93	12.66	22.91	13.97	48.88	16.62	25.22	61.16	27.67	25.24	49.39	24.78	29.46	30.2	17.79	16.08	23.15	34.66	36.07	42.13	11.46	11.71	9.57	41.34	12.25	33.46	30.34	25.22	47.33	18.84	14.74	20.3	20.18	47.6	39.95	16.92	21.14	20.47	44.44	31.39	50.25	84.68	41.52	42.55	21.19	10.34	16.02
ARSE	41.32	14.12	14.89	23.71	57.64	1	11.24	16.62	6.5	17.64	27.67	25.46	52.92	13.9	9.09	5.1	2.73	4.6	41.56	20.56	34.16	0.22	16.25	0.82	2.01	0.11	8.39	5.95	29.6	14.68	5.57	6.05	10.15	8.95	29.74	46.1	60.9	24.56	28.67	40.68	35.84	10.45	60.49	35.5	116.85	17.69	30.38	18.47	44.65
ARSF	0	0.04	0	0	0	0	0.26	0	0	0.06	0	0.03	0	0	0.08	0.69	0	6.02	0.09	0.08	0	0	0	0.04	0.05	0	0.03	0	0	0.03	0.07	0	0	0	0	0.06	1.04	0.13	0.12	0.06	0.06	0	0	0	0	0	0	0	0.08
ARSG	0.79	1.16	1.04	0.63	1.31	5.42	8.97	2.28	2.83	3.3	0.91	2.65	3.52	2.54	3.22	6.67	4.41	7.8	1.09	4.05	1.3	2.68	1.67	1.9	1.76	4.83	4.7	3.1	1.31	3.89	3.94	2.56	1.87	2.01	1.86	1.82	2.77	2.22	1.73	4.01	1.99	1.72	0.24	0.96	2.43	2.76	4.54	5.81	3.16
ARSH	0.06	0.05	0.07	0	0.03	0	0.09	0.1	0.21	0.11	0.06	0.33	0.18	0.22	0.03	0.12	0.22	0.14	0.07	0.1	0.12	0.08	0.05	0	0.06	0	0.59	0.14	0	0	0.09	0.19	0.36	0.03	0	0.4	0	0.08	0.08	0.51	0.14	0	0.16	0.05	0	0	0.2	0	0.13
ARSI	0.06	3.5	0.61	0.39	4.74	2.16	56.9	0.43	0.74	5.78	3.4	0.26	0.23	2.68	1	3.28	0.61	4.27	1.68	3.22	0.62	1.69	0.63	1.29	4.91	1.25	0.13	1.1	0.67	0.31	1.52	0.59	0.57	2.58	5.75	1.91	3.11	4.17	9.27	5	1.47	1.74	1.59	2.13	8.27	2.65	4.81	6.46	0.46
ARSJ	1.18	9.78	5.1	3.91	6.95	8.34	2.99	5.29	2.29	12.1	1.64	9.25	2.6	6.85	4.32	4.69	1.39	3.81	1.03	2.69	1.56	4.76	0.96	4.83	4.78	22.49	3.76	1.8	0.98	0.96	1.81	3.96	2.52	4.98	9.16	16.97	3.13	2.11	6.32	23.49	1.28	0.65	1.4	2.37	12.28	5.22	2.36	4.51	0.88
ARSK	1.65	2.09	3.12	3.86	4.61	7.52	2.61	4.1	4.84	4.72	3.27	4.79	3.32	5.92	4.15	5.13	3.08	2.85	1.29	3.08	2.36	2.82	2.69	2.7	1.55	5.13	3.04	1.98	1.73	1.66	2.27	2	2.31	1.96	5.52	3.62	4.91	2.56	4.8	5.94	1.87	1.97	2.09	3.01	3.73	4.6	2.91	5.34	4.09
ART1	0	0	0	0.04	0	0	0	0.05	0	0.34	0.04	0	0	0	0	0	0	0.05	0.05	0.06	0.04	0	0	0	0.04	0	0	0	0	0.09	0.12	0	0.29	0.09	0.05	0.05	0.53	0.11	0.1	0	0.05	0.14	0	0	0.21	0.05	0	0.09	0.09
ART3	0.2	0.05	0.47	0.1	0.86	0.28	0.25	0.08	0.35	0.28	0.06	0.76	0.12	0.2	0.22	0.63	0.24	1.31	0.08	0.36	0.1	1.17	0.9	0.47	0.04	0.05	0.48	0	0.22	0.04	0.64	0.14	0.24	0.15	0.09	0.16	0.07	0.18	0.45	0.04	0.32	0.04	0.09	0.5	0	0.9	0.14	1.58	0.07
ART4	0	0.12	0.68	1.92	0.16	0.79	0.52	2.25	0.35	0.88	0.11	0.25	0	0.23	0.51	0.34	0.27	0.4	0.64	0.24	0.3	1.03	1.02	0	0	0.06	0.05	0	0	0.22	0.06	0	0	0.6	0.1	0.18	0.74	1.35	0.28	0.04	0.27	0	0.05	0.06	0.39	0.05	0.9	0	0.08
ART5	0	0.07	0.04	0.16	0.1	0.11	0.06	0	3.46	0.36	6.14	0.09	0.35	0.1	0.23	0.16	0.13	0.24	0.88	0.42	0	0.17	0.24	0	0.49	9.37	0.31	1	0.7	3.36	0.31	0.6	0.29	0.54	0.29	1.06	2.96	0.35	0.12	0.91	2.11	1.51	1.59	0.32	0.59	1.21	0.05	0.44	0.07
ARTN	1.95	3.17	0.3	0.18	4.55	1.84	4.57	0.39	1.39	0.38	0	0.67	0.23	1.23	0.44	0.75	0.24	0.6	6.18	0.73	0.19	0.07	0.22	0.94	1.9	13.28	2.35	0.67	0.09	0.73	0.31	0.48	0.08	0.57	0.82	3.53	1.74	0.51	0.45	1.17	1.15	1.19	3.2	0.73	1.52	6.34	0	0.72	0.09
ARV1	48.23	28.35	26.88	29.75	33.4	32.11	60.25	28.88	91.7	36.56	27.86	32.17	62.89	44.33	74.09	63.08	36.6	19.13	16.55	20.93	39.47	8.9	25.72	38.3	19.72	32.34	5.88	22.3	18.81	26.72	25.77	16.02	25.33	19.15	25.14	32.82	40.39	20.37	26.22	18.55	17.53	36.75	29.84	28.8	27.72	35.51	39.35	33.82	26.4
ARVCF	3.53	2.71	2.5	2	8.06	2.9	4.18	2.7	1.73	4.25	2.79	3.76	3.12	4.74	4.93	2.71	2.16	2.77	6.81	5.23	4.77	4.3	1.13	2.16	3.08	7.5	3.18	1.39	1.29	2.88	2.66	1.28	2.3	1.48	7.7	11.06	4.29	3.48	4.56	9.53	7.19	3.98	12.21	7.39	19.33	4.53	2.82	8.47	3.39
ARX	0.07	0.05	0.65	0	1.92	1.39	0.03	1.31	1.19	0.31	0.08	0.98	0.9	2.99	0.23	0.13	1.77	0	0.1	0	0.39	0.95	0.32	13.33	0.02	0.31	0.27	0.82	6.73	0.2	1.33	1.28	0	0.42	2.33	0	0.62	0.24	0.11	0.02	0.14	13.91	0	0.06	55.57	0.49	0.04	0.39	0
AS3MT	0	0.29	4.58	1.68	1.9	4.18	1.53	1.05	3.2	2.28	1.66	5.69	6.25	1.51	4.42	6.6	1.64	1.81	0	0.29	0.37	0	0.73	1.51	3.12	3.51	0.79	0	1.63	5.31	0.84	0.46	0.37	0.29	10.46	38.77	12.34	1.87	2.3	0.94	4.52	1.08	0	5.34	7.66	5.07	0.62	14.05	0
ASAH1	87.57	86.99	152.36	91.73	197.49	157.22	127.74	149.08	180.87	365.38	210.61	173.38	212.54	184.63	250.76	222.1	66.38	122.1	66.02	97.73	153.42	132.98	87.22	144.13	57.81	201.8	113.92	61.55	59.43	80.51	75.81	84.58	122.27	62.81	128.92	257.17	187.16	133.87	179.98	165.76	69.1	93.52	39.66	132.45	120.99	457.8	242.01	147.88	81.13
ASAH2	0.75	0.44	1.02	0.9	18.81	0.96	28.82	3.71	2.65	0.64	1	0.53	0.29	3.09	4.52	0.55	1.5	0.36	0.65	0.13	5.08	0.51	1.19	0.64	0.46	2	0.71	4.93	104.64	2.88	1.88	0.67	0.88	13.02	0.93	0.21	0.81	1.1	0.65	0.88	0.58	8.15	1.03	8.42	0.92	0.93	2.49	2.04	0.62
ASAH2B	6.41	2.43	8.72	5.67	4.9	15.41	0.36	25.47	13.72	3.71	8.05	6.6	4.61	11.32	5.44	6.01	5.69	3.54	3.12	3.32	3.62	5.87	5.02	7.32	3.9	15.05	6.62	0.87	0	4.82	2.47	3.45	0	2.11	10.98	1.11	2.41	1.76	5.73	4.12	6.18	1.62	8.1	3.48	7.17	12.12	2.25	13.36	0.37
ASAP1	21.06	11.77	38.08	21.48	14.21	17.64	16.75	20.92	22.51	55.16	18.94	29.34	28.65	32.67	26.96	37.66	8.66	10.75	10.86	16.84	9.73	16.56	11.69	12.28	9.49	20.1	8.06	10.72	5.97	9.18	8.06	9.4	9.82	16.26	23.52	17.57	15.53	15.79	27.35	19.7	26.9	6.98	18.94	15.95	20.75	49.52	20.96	32.27	24.52
ASAP1-IT1	0	0	0	0.05	0.1	0	0.28	0.1	0	0.11	0	0.25	0.11	0	0	0	0.16	0	0.11	0.14	0.04	0.06	0	0	0	0.07	0.05	0	0.3	0.05	0	0.09	0	0	0.12	0.16	0.05	0.12	0.22	0	0.05	0	0.24	0.07	0.08	0.39	0.2	0.1	0.25
ASAP1-IT2	0.19	0.35	1.36	0.44	0.75	1.53	1.01	0.6	0.43	1.11	0.5	2.74	0.69	0.43	0.45	1.64	0.27	0.38	0.46	0.67	0.22	0.51	0.26	0.13	0.29	0.16	0.21	0.59	0.25	0.2	0.11	0.28	0.18	0.28	0.37	0.15	0.28	0.38	0.8	0.48	0.49	0.15	0.61	0.8	0.39	0.77	0.86	1.12	1.01
ASAP2	29.38	22.63	57.78	52.14	29	49.89	15.95	69.55	46.23	46.58	34.97	47.76	65.76	51.64	56.47	30.81	37.17	18.69	20.17	22.12	19.52	24.4	16.93	18.38	45.52	11.9	35.49	18.61	14.28	23.54	23.29	22.08	24.13	21.71	36.82	27.83	22.37	11.74	40.29	25.33	40.04	26.58	26.26	54.41	12.79	29.98	29.34	32.3	37.19
ASAP3	0.97	3.48	3.38	3.57	7.13	2.05	2.3	18.38	23.89	16.68	2.48	4.29	6.23	7.24	12.72	3.81	12.71	18.28	13.77	7.31	3.98	2.58	2.81	5.99	2.4	11.07	7.3	11.36	2.89	7.27	16.31	6.34	2.02	7.42	3.02	13.41	7.31	15.49	10	4.46	11.83	10.19	1.46	6.66	7.27	5.12	3.5	10.55	1.08
ASB1	5.69	3.55	7.64	8.08	5.4	7.36	11.89	8.87	7.08	9.96	4.2	7.06	4.88	7.24	7.59	4.67	7.77	4.1	8.24	5.21	7.08	4.11	5.71	2.98	10.53	6.75	4.46	4.56	3.96	4.95	4.69	2.89	3.63	4.28	6.74	5.87	5.42	6.67	9.65	3.26	7.71	5.14	5.03	4.53	5.88	9.85	6.5	8.12	4.31
ASB10	0	0	0	0	0	0	0	0	0	0	0	0	0	0	0	0	0	0	0.04	0	0	0	0	0	0.12	0.05	0	0	0	0	0	0	0	0	0	0.18	0	0	0	0	0	0	0	0	0	0	0.03	0.1	0
ASB11	0.1	0.24	0.84	0.18	0.21	0.63	0.55	0.16	0.25	0.26	0.13	0.76	0.14	0.29	3.16	0.66	3.32	0.07	0.19	0.43	0.07	0.11	0.17	0.16	0.39	0.12	0.4	5.17	0.25	0.13	1.72	0.58	0.05	0.19	0.2	0.17	1.44	0.15	0.35	0.13	0.35	0.17	0.43	0.48	0.16	0.35	0.28	0.69	0.58
ASB12	0.34	0	0.74	0	0.04	0.5	0.25	0.7	0.96	0.25	0.36	0.22	0.71	0.42	0.23	0.16	0.73	0.38	0.2	0.26	0.69	0.11	0	1.38	0.13	0.13	0.05	0	0.13	0.86	0.79	0.17	0	0.05	0.11	0.68	0.46	0.34	0.35	0	0.24	1	0	0.27	0.35	0.05	0	0.19	0.27
ASB13	38.5	19.1	21.16	62	13.83	17.5	31.16	44.27	14.79	23.72	17.21	19.38	16.61	9.7	36.11	21.86	15.86	11.56	18.01	21.52	40.97	22.65	14.97	8.51	18.63	29.78	26.95	11.31	33.51	27.39	14.34	12.17	9.68	39.63	20.09	19.99	20.49	28	27.03	23.45	44.51	25.53	27.4	39.75	25.41	16.96	10.29	20.67	15.21
ASB14	0.42	0.53	0.43	0.52	0.3	0.51	0.72	0.44	0.64	0.89	0.42	0.58	1.13	0.49	0.86	0.73	0.25	0.46	0.31	0.29	0.25	0.41	0.27	0.29	0.34	0.15	0.19	0.11	0.23	0.32	0.24	0.1	0.41	0.05	0.59	0.19	0.16	0.51	0.54	0.1	0.33	0.78	0.4	1.03	0.16	0.83	0.74	0.26	0.7
ASB15	0.02	0.03	0.19	0	0	0.52	0.19	0	0.08	0	0	0.38	0.06	0.02	0	0.09	0	0	0	0	0	0	0	0	0.02	0	0	0	0	0	0	0	0	0.02	0	0	0	0	0	0	6.99	0	0.07	0	0	0	0.02	0.1	0.37
ASB16	0.25	0.64	0.74	0.47	0.97	0.84	1	0.66	0.72	0.66	0.21	0.74	0.44	0.52	0.49	0.75	0.47	0.45	0.49	1.79	0.37	1.32	0.97	0.4	0.43	1.9	0.42	1.11	0.27	0.3	0.59	0.15	0.43	0.43	0.58	0.91	0.7	0.58	1.14	0.38	1.32	0.4	0.82	1.01	4	0.8	1.23	0.86	1.13
ASB16-AS1	6.87	7.63	7.11	4.71	6.43	7.03	15.3	6.54	9.25	7.5	4.85	7.01	8.86	12.21	7.65	10.77	5.66	5.98	4	12.53	6.67	10.7	13.99	8.79	6.87	24.8	8.47	8.73	4.21	4.35	9	3.41	10.38	10.47	11.18	10.13	7.01	10.32	6.95	10.43	13.66	4.94	10.61	10.74	19.85	5.93	12.97	13.88	12.17
ASB17	0	0	0	0	0	0	0	0	0	0	0	0.27	0	0	0	0.06	0	0	0	0	0	0	1.54	0	0	0	0	0	0	0.06	0	0	0	0	0	0	0	0	0	0	0	0	0	0.08	0	0	0.06	0.06	0
ASB18	0	0	0.13	0	0	0	0.06	0	0	0	0	0.05	0	0	0	0	0	0	0.05	0	0	0.05	0	0	0	0	0	0	0	0	0	0	0	0	0	0.09	0	0	0	0	0	0	0	0	0	0.42	0	0	0.04
ASB2	1.37	3.54	5.92	0.75	1.84	0.52	0.3	3.72	1.51	2.71	0.82	0.21	0.21	5.79	6.74	3.59	14.22	6.16	1.97	8.96	4.31	11.7	13.55	2.96	0.61	1.2	1.2	16.06	6.83	4.98	11.47	6.16	5.04	5.97	2.53	9.47	7.18	16.55	8.74	1.71	6.72	3.46	0.31	1.59	5.75	1.59	7.95	11.11	1.91
ASB3	11.76	6.25	18.78	17.24	6.13	17.77	19.23	19.12	25.97	19.59	13.89	21.54	12.13	41.51	21.32	21.1	9.27	9.65	8.45	12.63	9.68	10.91	9.61	10.52	8.13	13.49	9.99	7.76	2.06	8.32	9.26	6.46	6.33	10.08	9.66	7.94	10.3	9.31	10.68	11.39	6.06	10.25	5.77	7.98	6.48	9.36	11.41	16.89	11.48
ASB4	0.12	0	0.03	0.3	0.06	0.14	0.12	0.04	161.51	0.15	0.2	1.06	0	0.27	0.2	0.1	0.07	1.08	0.32	0.26	0	0	0.18	0	0.12	0.1	0.02	0	0	0.53	0.2	0.07	0	0.11	0.55	0.94	0.14	0	0.02	0.11	5	21.24	0	0.02	0.27	0.32	0	0.19	0.07
ASB5	0	0.2	1.95	0	0	0.1	0.02	0	0.04	0	0	0	0.02	3.48	3.34	0.94	0	0.8	0.02	0.29	0	0.51	0.03	0.91	0.03	0	0.02	0.08	1.69	0	0.07	0	0.05	0	0	1.27	0.02	0	0.22	0.59	0.7	0.17	0	0	2.25	0	0.26	3.65	0.02
ASB6	10.88	12.98	14.84	17.8	21.08	11.56	20.73	13.92	15.62	13.79	7.73	30.27	13.13	17.35	14.5	13.48	13.21	14.53	22.24	14.51	10.9	26.23	10.99	12.5	14.19	21.02	18.15	10.17	9.02	20.36	9.48	11.74	11.13	19.48	11.43	9.51	12.09	13.32	16.34	14.58	17.67	12.53	26.08	14.6	18.82	16.35	14.19	19.07	15.24
ASB7	8.02	12.08	13.1	6.85	8.55	10.61	14.87	19.82	10.91	12.36	10.56	8.89	12.67	14.77	11.95	15.81	7.5	11.85	6.27	9.51	8.47	11.23	7.85	7.93	8.89	12.05	10.72	4.14	6.01	10.42	4.73	4.2	9.36	7.74	9.32	14.9	7.29	8.08	10.31	9.45	9.61	6.09	12.01	19.55	7.72	34.99	15.76	15.77	13.81
ASB8	17.48	18.01	21.86	17.74	27.02	17.1	27.88	45.62	35.84	28.34	20.63	21.52	25.94	24.07	28.38	23.99	25.9	22.51	22.55	23.32	28.1	22.55	26.63	14.07	13.19	24.04	18.91	22.14	19.95	26.16	21.52	14.35	18.38	27.1	15.46	36.8	29.4	24.51	25.52	21.5	25.12	33.37	18.68	24.96	19.1	19.14	26.83	24.17	25.56
ASB9	0.51	0.89	3.97	7.53	13.66	2.21	2.18	9.93	0.98	3.75	1.03	5.82	1.89	3.22	2.18	2.08	1.48	2.93	0.91	3.34	2.1	6.04	11.48	4.82	9.86	13.67	3.09	3.42	1.09	5.19	2.11	3.25	5.53	2.78	3.54	3.45	3.27	5.9	3.22	6.84	5.61	1.5	0.57	2.2	2.47	8.1	3.33	5.09	10.64
ASB9P1	0.29	0.1	0.72	0.44	0.45	0.93	1.25	3.74	0.93	1.2	0.21	0.47	1.51	1.09	0.39	0.56	0.17	0.19	0.2	0.66	0.28	0.09	0.16	0.11	0.1	0.41	0.08	0	0.21	0.56	0.14	0.33	0.05	0.18	0.34	0.34	0.36	0.09	0.35	0.11	0.49	0.55	0.67	0.69	0.28	1.7	0.93	1.34	0.76
ASCC1	15.93	17.3	34.76	24.37	20.83	37.67	56.43	109.74	46.01	31.9	20.6	17.27	28.89	25.16	31.71	38.02	19.01	23.58	13.45	20.32	19.04	18.77	20.92	23	23.33	31.95	22.75	11.03	12.44	35.27	12.6	11.75	17.16	14.84	33.48	26.99	17.35	19.56	25.18	49.29	26.79	12.73	14.22	24.95	22.74	25.82	16.95	23.71	32.24
ASCC2	47.38	40.37	30.83	56.6	64.01	35.91	19.91	33.79	28.88	45.56	35.83	31.61	39.21	54.8	39.84	38.85	94.38	101.49	61.49	48.21	47.71	48.14	39.26	33.08	44.61	45.11	59.46	53.42	39.41	33.12	60.89	49.14	47.85	35.87	41.15	83.21	76.47	50.12	56.27	100.57	86.58	42.21	72.13	67.86	54.59	48.44	50.07	60.6	45.89
ASCC3	47.21	8.01	55.71	38.66	26.27	28.13	14.57	40.76	21.91	25.21	46.49	42.56	26.19	26.34	22.61	33.97	19.14	18.61	6.3	8.57	13.08	16.26	13.46	17.3	12.69	13.55	20.6	8.58	9.72	11.22	8.56	10.96	21.41	13.42	16.56	14.75	9.85	10.82	26.34	17.04	45.28	16.31	17.25	18.65	20.01	63.28	18.41	38.16	44.15
ASCL1	0.02	0.03	2.87	0	0	0.02	0.18	0.09	0.21	0.02	0.02	3	0.05	0	0.29	0.3	0.9	0.05	0.05	0.13	0	0.36	0.21	0.07	0	0	0	1.82	0.13	1.23	3.92	0.89	0.09	0.12	0.71	0.14	0.62	0.14	0	0	0.05	0.28	0	0	231.8	0.03	0.09	0.73	0
ASCL2	64.95	3.85	14.68	0.35	90.97	0.37	72.74	10.2	6.37	2.56	14.92	14.84	31.76	4.73	38.41	67.29	12.85	3.34	300.56	1.52	161.84	16.37	1.35	3.28	1.87	39.73	7.52	5.47	11.01	28.7	6.01	57.18	4.72	146.29	0.92	5.67	1.38	63.38	9.29	0.95	23.71	49.59	137.49	43.87	46	145.85	10.05	38.58	0.95
ASCL3	0.1	0.28	0.12	0	0.19	0	0	0	0	0.12	0.09	0.77	0	0	0	0.12	0	0	0	0	0	0	1.83	0	0.29	0	0	0.84	0	0	0.13	0	0	0	0	0	0.19	0	0.11	0	0	0	0	0.15	0	0.22	0.1	0.22	0.1
ASCL4	0	0	0	0	0	0	0.03	0.08	0	0.05	0	0	0.05	0	0.05	0.14	0.08	0.03	0	0.04	0	0	0.08	0	0.07	0	0	0	0	0.03	0.03	0.05	0	0	0	0	0.02	0	0	0	0	0	0.03	0	0.04	0.03	0	0	0
ASCL5	0.19	0.17	0.22	0.11	0.36	0.05	3.3	0.3	0.69	0.22	0.07	0.3	0.77	0.04	0.37	0	0.07	0.04	3.17	0.64	0.36	0.05	0.06	0.39	0.31	3.58	0.22	0	0.12	0.39	0.16	0.15	0.16	0.46	0.35	0.26	0.3	0.2	0.09	0.17	1.71	0.39	0.63	1.71	0.38	10.87	0.04	0.5	2.01
ASF1A	23.83	6.33	25.69	17.59	11.61	31.17	15.23	22.7	26.23	18.2	17.51	35.08	26.48	16.7	18.48	20.49	14.93	15.52	9.57	7.7	16.01	16.26	22.24	11.09	9.91	12.15	11.36	9.37	6.01	22.44	14.7	5.87	14.4	11.57	22.61	8.16	12.76	14.54	13.61	7.72	17.68	15.36	24.12	19.26	15.96	39.95	12.61	15.2	15.04
ASF1B	51.76	71.87	30.66	39.98	73.2	45.19	17.23	61.86	50.66	11.09	51.69	51.91	49.05	30.69	29.47	66.01	42.39	20.77	67.41	48.41	61.71	96.5	84.69	51.72	75.72	84.83	68.63	22.88	18.92	49.06	18.33	22.41	68.14	104.59	61.31	24.86	42.78	27.86	29.45	41.41	55.48	48.34	102.94	59.02	83.56	40.97	60.91	30.74	48.09
ASGR1	13.4	1.38	0.63	11.81	0.96	0.32	1.42	12.31	1.12	1.64	2.91	0.32	0.78	1.14	0.92	29.74	0.61	0.82	49.17	0.83	0.59	1.73	0.7	1	3.45	0.91	0.54	0.35	1.86	25.27	1.16	1.41	1.48	1.72	0.91	1.85	2.18	4.42	1.42	1.09	2.11	0.52	7.86	0.37	8.39	4.84	1.95	9.03	0.78
ASGR2	0.3	0.69	0.59	2.18	0.37	0.11	0.41	0.37	0.05	4.12	0.19	0.06	0.51	0.62	0.79	1.2	0.58	0.89	0.97	0.45	1.02	2.51	1.35	0.45	0.46	0.07	0.14	0.42	1	1.42	0.43	0.28	0.65	0.59	0.19	0.39	1.6	3.18	0.33	0.45	0.11	1.37	0.06	0.17	106.96	0.86	1.65	1.04	0.25
ASH1L	23.21	9.84	34.67	33.03	22.42	17.66	33.19	24.23	44.32	34.57	17.11	30.84	32.72	41.44	51.32	23.66	14.51	18.9	15.04	13.67	10.44	10.87	15.5	7.33	6.54	20.89	12.41	14.27	12.64	19.23	12.43	11	13.63	21.17	14.77	20.92	25.35	13.01	19.39	16.76	35.43	22.02	18.24	38.33	24.5	73.13	22.11	25.94	20.3
ASH1L-AS1	2.15	2.13	2.88	2.77	2.2	1.06	3.42	1.55	2.24	1.49	0.94	3.96	2.12	0.85	1.31	1.36	1.22	1.88	2.87	1.57	1.26	0.76	2.62	2.29	0.9	3.36	1.46	1.01	1	1.55	0.75	1.59	1.52	2.3	1.65	1.18	1.77	0.96	1.32	1.22	3.11	1.92	2.24	1	1.58	2.18	2.97	2.84	1.19
ASH2L	144.34	21.14	17.61	30.98	55.21	46.92	41.8	25.25	89.03	48.76	32.16	37.14	61.93	19.87	39.35	40.75	33.66	40.43	17.73	33.52	46.81	30.62	40.38	26.11	23.23	75.39	67.41	22.1	25.65	23.47	27.14	20.77	24.98	19.88	42.51	59.66	29	29.29	42.97	34.45	22.99	56.33	24.01	49.3	37.42	79.99	22.8	41.5	36.55
ASIC1	7.51	1.38	6.51	4.65	2.25	5.33	35.6	2.81	12.41	1.87	0.71	7.41	0.48	5.05	5.41	0.6	1.78	2.04	5.24	1.84	0.64	4.69	1.02	7.09	5.22	13.22	10.47	2.31	1.74	4.34	2.73	1.53	2.52	6.46	1.23	1.93	2.39	1.21	2.37	4.3	14.16	1.98	11.12	2.56	3.28	6.01	0.47	8.76	97.85
ASIC2	0.29	0	0	0.02	0.04	0.02	0.16	0.75	3.65	0.02	0.05	0.06	0.02	0.05	0.26	0.11	0	0.02	0.02	0.09	3.06	0.02	0.06	0	0	0.32	0.02	0.07	0.54	0.04	0.04	0.39	0	0.4	0.05	0	0.09	0.03	0.02	0.1	0.04	0.21	3.22	1.04	0.32	0.25	0	0.12	0.05
ASIC3	0.31	0.44	0.26	0.67	1.04	0.35	0.87	1.57	0.33	0.57	0.36	0.06	1.82	0.7	0.29	0.56	0.24	0.41	0.37	0.52	0.71	0.44	0.88	0.53	0.13	0.07	0.8	0.45	0.31	0.42	0.46	0.3	0.73	0.41	1.25	0.11	1.26	0.27	0.47	0.4	0.42	0.54	0.76	0.83	0.2	1.85	0.93	0.34	1.16
ASIC4	0.02	0	0	0	0.02	0.04	1.83	0.04	0.02	0.06	0	0	0	0.05	0.04	0.02	0.06	0	0.02	0	0	0.02	0.18	0	0.06	0	0	0	0.06	0.1	0.08	0	0.05	0.06	0.4	0.04	0.04	0.02	0.11	0.04	0.04	0.04	0	0.12	0	0.43	0.07	0.02	0.06
ASIC5	0	0	0.29	0	0.03	0	0.05	0	0	0	0	0	0	0	0.07	0.08	0.05	0	0	0	0	0	0	0	0	0	0	0.29	0.91	0	0.14	0	0	0	0	0	0	0	0	0	0	0	0	0	0.26	0	0.07	0.03	0
ASIP	0.11	0.16	0.27	0.65	0.33	0	0	0.38	0.13	0.13	0.22	0.89	0	0.11	0	0	0.18	0.12	0.13	0	0.32	0	0.35	0	0.33	0.67	0	0.96	0	0.25	0.15	0.64	0.15	0.12	0.14	0.37	0.43	0.7	0.38	0.58	3.54	0	0.27	1.53	0.54	0.38	0.6	1	0.48
ASL	82.36	120.63	35.93	112.86	111.89	48.61	46.99	29.17	52.05	47.55	92.72	41.4	60.99	41.03	68.56	24.27	148.69	36.04	79.92	99.3	108.18	20.19	43	26.97	56.8	25.65	242.77	58.69	93.46	182.33	71.66	103.44	90	94.62	62.48	138.34	119.96	57.47	91.83	87.13	612.88	170.96	101.1	131.59	34.26	13.83	47.79	103.2	70.93
ASMT	0.05	0.15	0.25	0	0.11	0	0.23	0.23	0	0.05	0.15	0.05	0.34	0.04	0.13	0	0.36	0.06	0.18	0.24	0.1	0.14	0.26	0	0.24	0.16	0	0.24	0	0.18	0.22	0.11	0.07	0.12	0	0	0.05	0.37	0.06	0.4	0.6	0	0.1	0.25	0.2	0	0	0.17	0.06
ASMTL	9.01	22.31	5.15	13.64	13.38	8.55	26.03	9.78	6.43	18.65	8.16	6.29	19.05	6.66	12.1	18.2	15.49	18.12	27.21	24.63	25.09	45.84	42.26	18.12	18.47	36.97	17.62	16.25	11.89	8.74	17.74	24.53	14.89	14.5	34.84	38.87	22.1	44.35	25.22	5.05	7.18	18.06	29.92	10.39	26.7	5.49	20.48	7.72	19.08
ASMTL-AS1	0.67	1.43	1.94	0.89	2.01	1.65	7.84	1.37	0.71	2.19	1.2	2.02	5.73	1.6	2.88	2.89	0.42	0.96	2.61	0.5	0.45	1.43	1.08	0.21	0.8	1.66	0.26	2.03	0.22	0.53	1.18	1.07	0.48	0.8	2.54	1.28	0.29	0.83	0.94	0.53	5.22	0.24	3.44	1.27	1.42	1.41	3.95	1.64	1.46
ASNA1	96.7	210.31	75.76	88.65	143.78	61.63	69.71	114.87	71.46	109.26	97.48	70.85	70.15	80.87	79.62	107.72	121.45	125.46	110.86	149.53	129.22	153.97	168.04	146.52	165.78	101.95	211.82	105.55	102.36	98.7	115.37	153	134.62	337.37	161.17	134.85	147.97	162.3	123.97	111.14	81.39	154.84	167.05	136.76	180.4	116.32	85.37	110.41	120.34
ASNS	146.59	32.64	21.39	25.49	55.18	50.2	25.64	39.46	32.52	21.97	18.79	53.17	49.94	47.08	41.21	29.01	53.58	14.61	57.11	17.69	10.78	35.05	42.87	34.75	40.32	54.19	37.16	18.26	8.38	27.25	21.61	14.08	15.14	48.05	44	36.19	87.53	13.7	21.56	33.22	22.01	22.08	69.23	70.13	26.4	36.17	10.02	21.87	1.18
ASNSD1	45.07	28.86	35.94	40.15	30.35	46.31	42.59	29.1	40.94	34.22	43.56	41.33	46.51	44.95	35.37	45.02	25.85	24.79	28.64	25.87	15.85	23.96	21.94	36.29	14.59	14.31	25.58	16.73	8.79	21.46	16.79	15.93	20.84	19.49	31.88	32.15	30.52	24.53	32.31	27.67	29.22	30.13	56.87	31.47	23.37	45.68	29.09	26.84	38.51
ASPA	0.26	0.59	0.26	0.58	2.92	0.54	0.33	1.21	2.72	5.01	1.34	0.2	0.38	0.96	6.61	2.18	1.17	2.37	0.4	0.73	1.66	0.21	1.85	1.57	0.04	0.31	0.14	1.63	4.44	0.63	5.12	1.22	3.7	0.5	0.44	0.14	1.31	2.45	1.34	0.16	0.14	0.97	0.1	0.48	0.38	0.31	3.28	0.44	0.67
ASPDH	0.07	0	0.08	0	0	0	0	0.08	0	0	0	0.07	0.12	0.18	0.06	0	0.23	0	0.12	0	0.06	0.44	0.43	0	0	0.37	0	0	17.3	0	0.19	0.27	0	0.29	0.16	0	0.36	0	0	0	0.08	0.07	0.09	0	0.58	0.16	0.14	0.07	0.07
ASPG	0.03	0.08	0	0	0.06	0.03	0.08	3.74	0.3	0.56	0.05	0.07	0.38	0.13	1.12	0.94	0.23	21.03	0.22	0.33	0.18	0.45	0.31	0.05	0.33	0.92	0.12	0.25	0	1.15	2.33	0.49	0.04	0	0.17	1.23	0	0.04	0.22	0.03	0.15	0.03	0.21	0	0	0.16	0	1.88	0.03
ASPH	185.03	85.16	392.56	373.46	79.15	599.84	159.89	53.97	82.18	152.08	152.69	196.91	141.53	253.39	115.55	136.77	108.53	62.73	135.74	72.71	51.12	88.65	14.17	189.69	64.25	56.35	174.23	59.32	41.61	110.69	65.66	63.75	77.27	94.91	350.13	32.82	49.62	37.56	191.74	246.59	74.82	67.84	99.86	161.9	129.9	166.97	66.28	63.17	239.51
ASPHD1	10.83	6.11	3.32	18.17	18	5.68	2.97	15.24	12.77	2.82	0.71	4.55	0.46	2.15	4.67	1.01	14.55	12.31	20.51	17.26	1.68	4.12	11.33	33.91	22.78	2.26	15.08	5.95	5.2	46.6	8.35	6.14	15.85	19.3	66.65	54.75	67.86	1.32	4.21	8.69	5.96	33.25	35.82	26.73	36.42	3.45	30.86	11.35	22.36
ASPHD2	1.31	9.7	5.25	0.7	4.61	17.88	1.72	3	6.26	10.28	5.05	3.64	7.18	9.01	7.14	8.64	34.94	4.18	3.49	7.52	6.44	24.07	17.67	8.18	6.04	2.36	16.1	21.13	4.83	6.71	16.44	18.56	16.88	3.11	6.34	1.68	8.7	5.42	15.26	4.3	11.09	6.62	6.22	7.53	5.12	3.14	5.32	6.05	4.84
ASPM	16.32	8.02	23.39	17.97	7.66	11.61	4.77	14.51	17.58	4.41	14.72	15.82	19.84	11.81	12.5	18.47	3.97	2.79	8.79	2.97	5.58	11.62	3.7	6.04	6.65	11.73	9.03	1.55	1.16	2.43	1.23	3.23	7.9	7.11	6.75	3	2.99	1.96	5.6	4.85	23.03	6.4	18.12	10.99	11.18	35.51	11.31	12.74	13.29
ASPN	7.77	42.68	64.58	9.33	83	60.64	23.36	45.87	11.67	323	141.09	11.25	36.7	84.24	126.17	29.29	4.5	12.28	5.88	86.79	21.21	30.69	11.44	8.23	52.63	6.41	1.65	3.22	4.21	6.6	7.92	9.85	14.38	27.65	9.17	82.67	50.93	74.27	181.4	92.27	34.79	10.49	20.84	27.15	25.48	18.29	64.54	141.7	6.18
ASPRV1	1.55	1.23	1.77	0.61	1.1	0.61	0.51	1.86	0.34	1.18	0.85	0.42	1.51	0.51	1.49	1.66	3.19	0.56	1.61	2.14	1.15	1.49	1.05	0.57	0.32	0.22	1.21	0.33	1.59	1.12	1.28	1.73	1.01	3.03	0.68	0.87	0.65	1.13	1.57	0.36	1.49	0.45	3.33	1.9	1.07	1.78	0.37	1	1.19
ASPSCR1	33.73	37.9	9.72	12.79	38.64	10.01	328.09	15.3	17.93	12.55	10.74	16.4	10.62	19.27	14.52	28.21	24.29	21.06	122.8	42.74	34.26	34.44	33.42	20.41	27.81	154.88	40.81	22.34	15.9	52.84	29.23	22.46	26.22	50.13	47.3	32	41.09	30.62	23.06	34.89	25.48	52.92	38.1	31.63	29.19	623.93	27.18	28.33	38.21
ASRGL1	20.31	9.28	13.08	29.11	30.79	0.78	1.99	14.23	15.36	7.22	8.04	98.86	3.73	8.03	15.25	6.64	23.91	5.19	9.78	18.54	15.91	20.48	14.24	4.91	2.46	5.79	13.46	16.65	4.35	54.94	16.79	14.66	8.95	10.09	14.03	9.46	47.05	18.73	30.54	7.52	14.98	9.52	5.24	18.48	41.32	5.28	9.07	21.77	2.72
ASS1	227.07	735.2	402.33	91.33	60.9	184.94	371.27	179.99	79	161.01	809.12	177.57	195.31	169.25	371.31	145.29	82.74	154.73	936.66	273.92	226.82	390.84	23.41	529.39	76.05	44.45	490.07	68.58	182.65	585.18	66.21	444.11	316.57	1140.39	106.9	159.01	87.27	244.98	185.32	244.67	1793.82	498	557.08	209.95	341.72	281.96	5.41	90.94	3.59
ASTE1	8.27	3.6	8.6	10.56	7.75	7.37	9.81	17.04	7.92	9.47	12.77	10.87	12.22	6.18	16.6	13.76	8	6.89	4.65	4.86	7.78	5.43	4.54	3.92	2.63	14.62	7	7.77	6.16	11.8	5.87	3.31	7.92	12.59	5.25	11.38	10.3	6.82	7.15	4.82	11.49	10.23	5.29	15.39	5.8	9.04	12.09	12.32	12.07
ASTL	0.04	0.06	0.15	0	1.79	0	0.12	0.09	0	0.15	0.04	0	1.05	0.04	0.05	0.73	0.51	0.52	1.09	0.26	1.54	0.22	0.07	0.15	0.39	0.13	1.66	1.15	0.27	0.33	0.12	0	0.66	0	0.05	0.68	0.08	0.22	0.1	0.05	0	0.09	0.27	0.61	0.07	1.01	0.44	0.05	0.4
ASTN1	0.02	0.08	0.04	0.01	0	0.02	0	0.04	10.24	0.08	0	0.23	0	0.53	0.29	0.26	0.11	0.05	0	0.24	0.06	0	0.21	0.02	0.09	0.16	0.04	0.12	0.47	0.05	0.16	0.03	0	0.03	0.08	0.09	0.3	0.22	0.21	0.03	0.03	0.05	0	0	1.3	0	0.11	2.53	0.01
ASTN2	6.82	7.83	22.8	13.96	11.37	20.7	30.46	18.52	36.28	12.82	9.32	35	21.52	24.08	15.07	25.31	6.14	6.76	9.95	12.33	7.87	8.45	8.84	12.21	11.25	19.84	6.93	6.71	9.04	9.1	7.21	3.9	4.82	9.26	8.1	10.59	8.88	7.36	8.63	10.1	14.83	8.47	17.9	20.62	38.35	30.13	13.58	40.95	20.19
ASTN2-AS1	0	0	0.03	0	0.03	0.04	0.04	0	0	0	0	0.16	0.07	0	0	0.11	0	0	0	0	0	0	0	0	0	0	0	0	0	0	0.04	0	0	0.03	0.04	0.03	0	0	0	0	0	0	0	0.05	0	0.04	0	0.07	0.03
ASUN	39.92	17.42	29.13	53.19	21.93	46.62	22.82	39.05	34.27	18.93	41.43	36.46	37.65	22.26	19.6	24.46	16.44	18.4	12.72	12.56	11.62	16.65	16.53	13.97	21.25	12.17	28.2	8.1	7.76	8.25	8.92	9.22	13.88	18.95	35.75	18.33	17.03	10.66	18.25	32.55	40.34	15.06	33.47	25.25	12.08	18.05	18.95	23.99	35.52
ASXL1	31.99	25.43	51.31	32.64	22.89	22.64	33.05	33.16	31.21	33.45	18.73	48.05	48.3	30.51	26.32	26.71	19.05	16.3	35.51	20.33	16.24	18.53	18.15	18.92	26.69	27.89	38.31	15.77	12.02	16.56	13.7	15.56	17.8	24.87	30.39	50.21	21.88	18.55	23.94	36.27	36.98	26.74	51.12	33.17	33.78	55.63	42.47	37.54	51.27
ASXL2	29.42	12.2	30.21	21.23	13.83	24.6	30.47	37.67	21.87	37.25	26.35	31.95	32.55	24.17	35.76	33.9	12.74	14.66	12.49	9.59	11.93	13.54	12.33	9.79	9.96	22.37	11.16	10.27	9.35	15.64	8.24	8.83	11.34	13.51	12.95	16.03	14.96	13.48	17.18	12.63	15.57	11.72	14.78	32.43	15.32	44.55	14.12	28.74	18.4
ASXL3	0.39	0.11	0.04	0.04	0.12	0.19	0.13	0.11	0.18	0.92	0.1	0.05	0.01	0.35	1.41	0.25	0.37	0.1	0.04	0.07	0.04	0.09	0.13	0.22	0.06	1.31	0.12	0.58	0.53	0.07	0.38	0.22	0.02	0.15	0.15	0.26	0.4	0.36	0.76	0.14	0.09	0.04	0.01	0.35	0.24	0.09	0.05	0.5	0.04
ASZ1	0	0	0.23	0.23	0	0	0	0	0.14	0	0.03	0	0	0	0	0.04	0	0	0	0	0	0	0	0	0.03	0	0	0	0	0	0	0	0	0	0	0	0	0	0	0	0	0	0.04	0	0	0	0.06	0	0.03
ATAD1	43.01	25.11	69.88	42.1	26.59	59.33	5.06	36.34	34.53	49.81	57.48	40.78	57.13	90.99	56.01	64.48	28.13	31.06	8.97	28.63	23.85	39.99	21.25	34.08	24.58	35.84	30.37	15.87	15.17	19.38	18.14	16.1	14.34	22.52	61.13	38.05	25.11	18.99	35.05	48.74	39.29	18.8	25.2	38.21	27.31	57.62	40.18	47.7	38.26
ATAD2	70.59	26.53	53.89	33.11	27.12	39.29	20.5	124.08	64.65	12.96	30.59	55.73	41.6	136.81	22.14	33.65	10.99	14.79	34.14	7.11	12.35	19.25	19.3	15.95	120.62	37.37	36.24	5.53	3.76	10.58	3.69	7.39	13.83	32.74	17.28	15.83	5.41	6.37	17.37	27.5	61.39	13.14	56.58	41.98	38.02	77.22	28.58	27.39	38
ATAD2B	4.14	2.57	8.7	6.15	5.36	6.19	7.01	10.43	6.31	6.47	6.35	8.31	7.32	4.83	8.65	7.49	3.42	6.08	3.21	1.86	2.67	2.72	3.75	2.12	1.55	7.56	2.43	2.03	2.13	3.22	1.96	2.2	2.73	3.03	4.54	2.53	3.14	2.37	4.23	2.43	5.04	2.39	2.8	6.46	2.65	8.32	4.79	6.55	6.12
ATAD3A	25.78	43.38	28.98	70.9	54.99	25.48	29.16	48.78	22.12	14.59	25.29	25.45	16.52	19.93	22.32	9.77	54.3	29.79	69.98	37.94	42.4	34.45	31.88	34.13	59.2	60.66	78.77	15.61	16.94	46.11	18.71	22.21	34.69	64.89	16.09	34.5	30.44	28	36.11	51.83	56.69	64.14	96.94	43.4	33.26	38.87	39.17	21.65	45.3
ATAD3B	11.96	10.66	16.98	56.59	22.13	17.06	14.09	32.62	12.46	7.02	15.05	15.51	14.92	3.46	9.26	4.9	35.58	12.72	72.2	5.01	20.08	46.46	10.28	16.05	33.4	16.29	46.05	6.36	5.47	21.41	2.13	13.06	21.03	37.69	11.53	11.88	9.33	12.59	16.28	20.01	35.48	15.19	50.2	8.92	8.62	12.6	22.55	13.87	18.4
ATAD3C	2.11	0.91	3.13	0.61	1.06	2.69	15.1	1.63	2.27	1.24	0.34	3.08	4.3	0.59	2.79	1.28	1.71	1.06	3.54	6.61	0.94	7.06	0.76	0.35	2.18	2.97	0.33	1.91	0.63	2.39	1.64	1.1	0.35	0.99	3.74	0.26	0.61	0.87	2.01	4.75	0.73	0.29	0.72	3.47	3.89	0.54	1.06	1.54	0.8
ATAD5	6.4	1.94	6.02	7.38	3.39	5.09	3.5	4.85	6.14	1.57	4.08	8.76	6.51	4.4	5.06	6.42	1.89	1.53	2.13	1.67	1.78	2.54	2.58	2.02	3.2	4.06	2.31	0.81	0.83	1.59	0.75	0.61	2.36	2.58	1.97	1.23	1.38	1	1.93	3.16	5.76	2.42	4.65	4.66	2.42	5.78	3.53	7.37	9.65
ATAT1	13.42	12.78	21.73	17.06	24.15	20.22	74.1	14.2	34	14.72	14.85	30.99	29.39	18.16	17.88	18.68	7.76	7.4	16.02	7.23	10.94	12.36	9.66	13.98	10.86	23.47	18.82	6.19	6.92	16.87	6.92	7.48	11.74	15.33	14.85	16.22	8.79	8.87	15.14	12.96	13.23	8.15	7.43	20.97	13.08	14.28	8.66	23.8	17.35
ATCAY	0.29	0.46	3.17	0.96	1.1	2.81	3.53	0.69	0.9	0.84	0.27	4.43	1.1	0.77	0.68	2.21	0.92	0.54	0.55	0.94	0.53	0.58	0.59	0.63	0.73	0.66	0.66	0.74	0.67	0.44	0.66	0.82	0.53	0.42	0.42	0.63	0.53	0.53	0.91	0.33	0.7	0.47	1.3	1.01	0.55	1.2	1.2	2.73	2.4
ATE1	32.56	8.4	34.85	29.72	23.55	29.51	42.35	27.68	18.71	24.8	31.9	20.17	19.34	21.62	40.33	30.89	16.05	17.48	89.33	12.48	16.53	15.99	6.84	13.83	10.29	15.62	17.11	8.22	11.81	20.85	10.05	10.22	6.73	14.02	23.82	71.11	18.61	10.55	19.79	18.37	35.98	12.96	32.05	31.79	17.2	31.68	12.89	37.86	16.33
ATE1-AS1	0.06	0.43	0.22	0.47	0.13	0.29	0.46	0.68	0.13	1.43	0.06	1.06	0.51	0.41	0.07	0.15	0.52	0.28	0.66	0.27	0.22	0	0.29	0.2	0.07	0	0.59	0.53	0	0.84	0.67	0	0.25	0.07	0	2.33	1.75	0.77	0.86	0.47	0.69	0.2	0	1.12	1.24	0	2.59	0.27	0.13
ATF1	35.76	20.6	33.68	29.14	22.66	43.69	43.05	27.06	38.55	26.89	31.31	35	28.26	30.96	28.37	30.26	18.26	20.12	21.52	14.16	21.69	23.32	25.55	28.09	18.63	21.12	26.45	14.5	16.25	22.02	15.18	14.29	18.53	24.4	16.15	20.65	21.51	23.13	21.11	25.55	35.27	24.99	21.91	33.71	18.87	37.05	21.33	30.57	37.45
ATF2	36.14	24.64	38.88	43.58	40.84	42.18	42.23	26.71	51.07	40.27	37.25	38.29	34.46	57.12	33.59	36.55	23.38	23.51	35.38	21.91	15.91	25.69	20.31	22.44	12.8	21.2	27.19	15.23	18.46	28.62	17.06	14.71	18.18	17.87	39.88	31.52	28.5	22.29	29.7	37.75	18.74	35.23	21.55	46.23	30.74	31.79	29.47	49.67	35.28
ATF3	43.55	103.09	23.39	19.8	23.06	29.67	3.56	53.42	27.96	28.07	86.03	122.77	20.51	61.2	32.59	144.51	25.09	63.59	16.02	26.55	34.17	8.67	38.55	23.36	21.65	51.14	53.32	15.25	97.06	113.31	17.45	196.92	26.37	73.99	38.52	15.23	23.77	49.33	44.34	27.83	41.08	27.54	22.59	15.74	15.52	10.81	71.1	38.47	18.35
ATF4	443.98	383.69	465.36	387.1	497.64	558.34	528.4	504.15	356.36	393.71	367.37	369.03	404.99	723.9	435.65	397.19	519.32	357.04	685.46	313.79	375.58	431.69	576.91	401.84	332.71	232.4	440.38	485.17	278	394.56	537.7	392.5	291.6	405.38	280.88	362.67	361.02	289.77	295.41	273.8	307.37	287.68	408.44	355.02	269.56	408.67	238.18	357.25	225.46
ATF5	12.12	48.15	28.01	39.46	64.07	23.46	48.63	34.51	23.33	24.76	23.81	9.14	20.4	42.85	16.75	15.33	53.86	30.88	123.74	47.49	50.22	86.33	643.52	84.53	37.94	47.77	53.36	52.4	57.82	33.85	30.86	48.12	113.79	74.72	34.93	55.54	49.07	52.91	39.63	32.83	22.02	57.6	65.41	26.63	201.17	96.92	93.06	29.26	53.47
ATF6	32.18	18.18	33.44	25.96	22.78	37.01	31.28	23.32	52.72	40.82	28.46	28.96	30.02	30.4	38.28	30.64	19.27	21.69	11.51	19.25	18	18.51	15.08	17.72	12.58	23.87	23.3	14.37	12.22	21.45	14.46	15.81	18.55	21.61	24.39	24.87	39.48	19.37	27.95	22.6	33.19	24.58	25.32	37.31	32.32	62.18	28.45	29.98	27.39
ATF6B	57.44	128.41	97.64	58.09	120.41	49.2	167.64	91.62	105.95	108.51	73.01	52.85	87.36	92.72	88.89	70.59	82.16	96.71	130.55	90.15	110.52	124.03	95.86	70.23	90.38	360.17	123.82	84.39	56.61	138.41	83.09	74.98	94.29	133.15	98.38	88.88	86.92	100.36	122.11	129.92	110.81	162.23	534.1	135.38	160.48	130.52	121.45	147.66	103.21
ATF7	23.59	29.68	48.34	43.78	56.55	41.49	38.96	42.75	64.99	68.05	33.67	51.94	61.57	47.62	47.97	37.79	25.24	38.35	25.61	37.46	24.74	24.47	28.65	26.92	27.31	29.41	35.72	24.24	21.39	30.67	21.46	24.73	24.72	32.21	20.83	40.94	39.58	32.64	47.75	33.86	46.53	24.16	38.03	50.94	34.26	45.57	34	54.93	43.6
ATF7IP	33.54	13.99	59.76	30.1	31.5	20.34	38.01	47.01	55.51	42.92	17.87	30.58	36.07	40.57	42.51	32.76	16.78	35.24	17.02	15.42	16.59	23.01	35.61	8.93	21.81	15.8	24.18	18.15	9.86	14.65	16.96	14.62	16.92	23.07	13.24	31.76	22.81	23.07	27.54	31.86	44.3	18.48	25.45	29.35	30.06	65.92	32.21	33.13	39.19
ATF7IP2	5.72	2.33	11.17	7.63	2.32	13.39	12.74	7.85	6.33	7.64	4.19	9.68	10.92	5.79	7.32	9.19	5.36	3.14	2.74	11.01	0.99	2.51	18	1	1.22	0.76	2.17	3.9	2.15	7.2	3.84	1.53	13.85	4.85	12.06	4.11	4.95	2.16	5.85	2.72	12.32	10.99	4.66	6.61	1.92	3.13	14.4	10.93	6.36
ATG10	4.98	5.46	2.84	4.29	4.46	7.4	6.84	3.22	3.24	5.19	7.86	6.16	7.4	2.6	6.27	7.7	3.46	6.01	2.51	4.26	3.21	4.49	3.07	4.74	2.37	3.24	3.39	3.16	1.98	2.06	2.49	2.2	3.5	4.14	6.31	7.14	4.85	5.24	4.35	6.85	1.42	1.91	1.95	3.23	3.99	2.48	2.44	4.95	2.71
ATG101	29.84	80.34	45.31	48.25	42.87	28.17	29.89	48.06	48.11	44.22	35.33	46.71	20.68	43.7	29.97	34.2	59.45	60.11	56.98	67.18	60.7	61.7	89.89	56.84	95.51	99.58	63.95	44.39	39.71	64.02	46.66	59.15	51.71	70.38	36.54	84.2	75.74	73.13	57.19	61.42	93.29	56.02	71.3	57.57	56.38	56.03	55.38	51	59.7
ATG12	18.49	21.55	26.68	40.59	20.49	30.79	12.51	22.81	15.14	25.08	23.64	14.92	32.56	37.86	24.93	22.55	14.58	11.92	6.15	14.63	14.88	21.56	14.45	24.47	18.3	14.9	17.35	18.24	20.26	13.21	11.38	17.99	16.91	17.44	71.79	17.59	20.22	16.58	19.84	26.52	13.26	4.99	32.67	13.64	13.58	15.24	10.39	22.11	13.18
ATG13	22.81	32.77	53.75	31.9	22.19	29.22	45.27	48.59	31.35	49.12	31.49	30.9	33.64	41.33	37.51	26.25	54.23	44.42	48.54	45.43	37.48	35.58	43	28.52	29.68	22.42	33.76	44.81	23.38	54.02	47.65	27.58	27.89	34.58	28.99	91.63	45.78	38.13	49.94	40.45	29.16	42.9	37.85	37.18	54.35	78.06	40.96	44.05	39.33
ATG14	5.52	3.73	8.08	9.35	7.46	9.46	18.82	12.5	11.97	11.2	10.11	11.43	13.71	12.62	12.73	8.67	3.87	8.74	6.66	5.18	4.42	7.38	4.64	4.77	6.45	3.02	3.92	4.54	2.99	5.21	3.68	4.3	3.94	6.88	4.89	4.06	3.89	4.42	8.11	8.76	5.4	5.82	8.34	6.76	3.64	9.64	7.69	12.5	7.94
ATG16L1	20.36	18.43	38.98	30.84	26.24	27.86	21.36	17.49	17.31	17.41	22.07	26.11	20.33	16.98	15.76	22.78	22.06	18.47	21.37	9.95	20.72	20.28	13.79	15.64	20.52	15.03	19.77	13.23	12.54	18.77	12.31	15.07	16.97	16.5	13.62	24.45	18.2	12.39	26.32	20.72	25.19	15.64	18.66	20.85	9.62	34.61	16.42	32.67	55.45
ATG16L2	3.12	6.19	5.33	5.46	9.17	4.82	8.73	6.27	4.39	9.05	4.04	3.99	6.08	6.48	7.02	4.71	3.95	8.92	9.76	3.94	8.16	7.17	11.06	2.18	10.48	7.53	3.87	5.46	1.87	3.29	3.02	2.57	3.17	3.6	5.71	2.15	3	5.56	7.48	3.32	7.03	1.53	4.1	4.76	3.5	3.51	6.94	4.63	3.53
ATG2A	14.78	12.02	21.8	12.39	30.4	13.43	24.58	24.44	14.38	15.59	19.72	11.94	14.52	13.97	13.82	15.29	16.6	15.35	29.06	19.48	22.18	17.99	25.75	12.1	32.01	23.5	27.95	12.27	15.96	27.25	12.31	19.66	16.37	19.21	21.11	34.54	12.28	20.39	23.43	17.51	24.92	22.75	28.55	19.7	24.01	34.93	13.99	23.68	23.99
ATG2B	9.67	2.72	12.54	15.56	5.85	9.43	7.48	15.99	14.92	19.61	10.54	23.34	20.34	16.84	19.22	11.01	5.48	8.59	5.79	4.44	5.63	3.95	4.07	3.87	5.36	7.38	6.63	4.77	4.92	8.48	4.4	4.52	3.21	5.76	4.41	4.25	6.19	5.02	9.71	4.98	13.98	4.97	8.49	13.54	5.19	9.39	5.97	13.15	6.16
ATG3	146.56	119.95	82.43	114.08	57.35	86.9	92.9	119.41	86.73	102.97	134.76	98.49	113.77	107.35	124.82	139.56	98.39	78.32	76.4	71.72	112.2	108.36	75.64	77.34	62.48	71.79	90.75	67.43	82.31	96.36	72.05	64.86	72.85	89.24	50.82	114.08	97.21	92.94	96.54	88.1	81.34	94.87	79.27	101.61	81.49	73.39	80.56	67.52	76.43
ATG4A	18.08	8.47	17.1	17.56	13.1	24.77	10.91	20.11	23.4	14.03	20.09	12.62	12.81	23.04	21.36	22.19	29.91	17.66	6.07	9.43	16.04	24.47	8.92	12.44	7.13	10.77	12.63	13.81	23.47	14.32	12.56	19.47	8.18	12.87	18.22	12.47	24.56	14.14	17.26	8.84	18.76	18.04	22.55	11.8	15.02	15.47	14.62	6.62	12.97
ATG4B	21.03	13.54	36.65	38.55	35.96	22.84	50.18	31.92	29.48	27.99	19.87	31.19	31.79	29.94	21.83	32.7	31.41	27.49	56.55	31.27	35.33	26.81	42.79	14.46	38.09	57.85	32.21	20.11	18.39	27.82	21.16	20.24	27.61	27.43	37.74	36.84	27.87	28.86	27.92	23.6	33.26	22.57	27.02	24.67	19.05	34.36	22.9	26.86	32.75
ATG4C	11.16	7.28	9.19	13.24	8.68	11.5	21.45	19.14	17.42	16.64	11.6	12.79	13.5	14.5	18.79	16.03	11.71	7.43	3.84	8.19	7.01	7.87	8.69	8.33	5.29	6.75	7.15	7.26	4.8	9.66	8.46	4.47	7.87	8.9	6.37	10.1	12.92	10.13	9.16	12.17	10.85	8.9	8.45	10.45	8.56	15.12	13.61	11.18	11.84
ATG4D	10.5	33.58	11.6	11.01	45.01	14.7	20.11	14.33	16.31	11.84	16.81	18.41	16.18	11.72	13.09	23.37	44.53	38.29	35.22	20.37	45.19	29.46	42.95	21.56	35.03	43.23	40.85	26.2	58.89	25.36	23.77	39.02	22.32	86.98	42.68	18.94	38.91	23.32	25.28	8.25	27.37	22.91	44.66	19.88	52.3	29.63	25.29	18.51	22.28
ATG5	65.52	12.15	58.76	39.75	33.68	50.26	16.75	58.8	27.54	31.68	48.87	42.29	43.15	32.48	31.93	45.54	25.96	24.26	11.73	15.36	26.07	21.96	18.93	32.17	29.52	15.53	28.12	16.91	22.27	11.06	19.64	17.39	25.18	19.6	36.44	23.99	22.96	15.14	27.63	16.88	26.9	23.01	26.97	26.78	23.52	58.44	17.81	29.04	33.71
ATG7	12.68	12.35	14.04	13.64	14.57	9.3	15.09	11.22	13.35	22.94	14.2	9.06	14.04	15.07	15.96	16.12	15.71	16.21	11.25	17.91	14.7	17.42	8.47	14.88	14.61	5.54	10.65	12.89	6.44	13.02	9.47	9.83	12.57	10.11	11.16	20.77	14.53	18.39	24.28	10.5	16.15	18.86	14.78	24.11	16.71	19.89	17.37	14.31	13.59
ATG9A	49.63	47.19	58.41	59.1	91.75	44.33	172.18	68.68	77.42	61.54	37.75	24.44	46.42	47.31	41.84	46.01	57.97	59.71	97.65	65.44	59.04	54.73	30.3	41.5	53.78	70.15	64.46	31.57	46.54	58.48	35.41	45.8	33.91	53.32	101.93	104.27	63.36	49.09	79.08	64.53	58.38	70.59	83.92	59.64	89.7	128.15	47.52	57.36	72.87
ATG9B	1.43	0.56	0.69	3.35	0.67	3.47	3.27	3.75	2.64	1.11	0.89	0.18	2.66	0.81	0.72	3.1	0.57	6.03	0.58	1.21	0.49	0.28	0.54	0.1	2.57	6.73	5.61	0.5	0.05	1.16	0.2	0.18	1.09	1.41	1.95	1.38	1.21	0.84	1.01	3.37	2.19	1.07	12.73	0.86	0.16	1.39	0.42	0.73	2.09
ATHL1	36.45	9.36	31.82	13.39	9.22	4.05	26.38	8.54	39.58	30.88	21.6	9.98	61.48	14.77	21.94	8.87	6.64	4.82	34.62	7.7	9.68	9.79	8.27	3.61	3.95	6.64	3.13	7.24	3.53	5.21	3.07	5.13	5.49	18.44	4.2	13.52	3.73	6.82	15.38	54.12	24.42	4.47	22.73	25	4.03	15.64	15.13	29.32	9.37
ATIC	196.27	115.94	124.23	224.49	100.93	124.19	239.09	127.37	116.23	61.96	132.09	84.45	120.61	59.1	60.46	114.19	88.54	42.35	126.07	80.58	123.16	83.41	102.57	91.27	111.27	128.73	130.02	46.17	41.57	100.99	48.49	54.41	125.87	93.07	155.73	158.45	86.49	79.61	96.73	183.08	155.28	100.94	109.48	101.71	57.18	161.7	106.92	176.3	239.29
ATL1	2.48	2.19	4.24	1.39	3.55	3.3	2.57	3.54	3.2	10.92	3.88	2.49	4.96	4.57	11.27	5.06	1.87	5.79	0.78	4.77	3.78	1.94	4.33	4.28	1.26	3.83	1.19	2.53	4.59	5.77	3.75	1.91	2.34	2.09	4.95	6.42	4.18	5.01	6.27	7.33	2.47	1.46	1.34	6.14	6.84	1.86	2.58	4.34	1.31
ATL2	65.4	18.73	69.58	51.06	36.85	57.7	128.12	74.4	63.28	31.83	53.7	76.88	49.79	43.11	65.82	62.13	27.84	55.07	27.12	20.66	29.41	20.63	42.19	26.72	41.17	29.24	27.59	15.87	25.66	23.7	16.44	16.49	20.42	26.88	47.76	34.92	23.44	12.3	28.77	62.59	57.65	34.35	51.12	52.33	19.62	56.67	42.23	53.74	60.98
ATL3	30.77	15.79	42.18	37.08	26.68	55.98	34.75	44.39	36.66	68.62	54.73	32.21	44.34	44.33	44.1	40.76	22.06	29.49	17.46	28.82	18.56	28.82	28.91	25.68	20.31	24.91	27.64	13.62	10.51	16.96	14.51	13.77	16.73	15.26	29.14	27.27	19.62	22.55	37.41	43.97	25.78	21.78	33.2	37.2	29.73	42.88	20.35	41.34	24.99
ATM	6.25	2.55	13.86	12.11	4.67	10.87	12.8	12.17	12.33	13.32	7.88	14.78	12.84	17.75	17.88	15.82	6.1	6.2	3.3	3.41	3.57	4.22	4.54	2.49	2.18	7.35	1.5	7.6	2.25	4.81	5.2	2.89	3.66	3.23	8.27	3.16	6.34	6.2	7.99	5.69	11.35	3.07	8.67	9.66	3.66	14.92	11.94	14.36	6.44
ATMIN	29.68	15.48	43.63	27.97	32	39.54	20.44	48.79	46.98	44.32	37.35	39.99	33.03	31.95	38.3	32.14	23.25	38.59	19.33	22.73	24.46	33.15	21.28	23.05	17.72	23.47	22.25	17.22	17.64	20.27	21.14	14.97	27.31	26.65	38.87	33.97	29.06	19.35	31.47	25.73	27	23.33	36.64	45.39	17.13	45.37	26.95	40.48	34.14
ATN1	38.4	106.01	66.4	70.05	100.31	83.52	127.83	77.25	109.05	103.47	54.51	53.39	59.83	70.73	75.17	60.33	86.79	85.04	107.31	117.54	91.73	91.77	79.17	70.62	109	109.39	91.35	66.2	72.69	49.22	63.6	76.39	70.47	93.05	72.2	154.68	130.92	110.36	114.25	103.58	106.45	76.44	87.41	71.08	161.67	59.74	74.6	102.68	84.53
ATOH1	0.05	0	17.98	0.31	3.32	0	0	32.07	5.46	0.44	0.05	47.47	6.71	0.16	1.85	0.66	0.63	0.53	0.37	0.16	1.26	0	0	0	0	0	1.46	0	6.85	5.79	0	1.17	0.15	0.29	16.74	0	0	0.07	13.53	0	11.84	2.83	0.74	3.11	4.39	0.31	0.06	0.47	0
ATOH7	0.38	0.1	0.12	0.03	0.07	0.04	0.72	0.19	0.75	0	0.03	0.18	0.71	0.1	0.19	1.42	0.06	0.16	0	0.11	0.3	0.09	0.23	0.3	0.04	0.88	0.45	0	0.11	0.2	0.25	0	0.25	0.12	0.41	0.28	0.07	0.09	0	0.04	0.32	0	0.04	0.11	0.12	0.29	0.18	0.39	0.44
ATOH8	0.16	0.62	0.53	0.22	0.75	0.14	21.96	0.48	0.84	1.61	0.17	0.52	0.11	2.28	0.96	0.77	1.36	1.25	4.73	1.98	1.33	0.92	1.81	0.36	0.29	4.3	0.42	2.14	1.77	1.61	3.13	1.48	0.44	0.95	0.52	0.92	1.43	6.43	1.23	0.27	0.6	0.83	0.43	0.51	4.71	2.57	0.33	0.6	0.28
ATOX1	160.77	246.53	145.8	210.81	135.21	85.61	82.57	123.33	117.07	154.62	174.74	37.06	88.08	178.93	125.17	155.91	156.44	131.42	134.1	229.19	139.45	238.58	204.08	294.88	265.99	112.77	140.05	250.07	367.01	225.67	233.34	299.56	222.25	258.21	251.1	281.94	193.05	306.33	197.98	248.2	190.74	475.07	231.29	98.69	243.95	96.74	290.47	168.7	163.17
ATP10A	9.75	3.31	6.64	4.49	6.42	2.81	18.7	3.16	2.04	8.92	3.05	3.31	1.06	7.73	3.92	20.55	4.29	2.34	1.87	4.86	1.8	3.69	2.92	7.44	2.13	6.32	0.79	1.38	0.93	0.95	1.23	1.62	2.65	2.63	2.53	4.37	8.32	8.64	9.12	3.54	2.83	1.35	7.81	7.46	5.52	3.36	5.43	10.18	20.13
ATP10B	69.92	24.56	49.64	1.42	58.19	2.93	0.17	8.08	2.05	27.41	11.65	22.35	100.25	6.6	25.89	21.66	10.57	16.02	10.93	10.04	67.35	35.58	5.42	10.3	0.15	0.41	0.7	5.88	16.69	21.98	5.98	38.26	14.29	45.03	2	0.17	29.76	6.23	36.09	1.63	52.99	2.49	32.23	42.15	14.04	8.09	1.31	4.3	14.63
ATP10D	1.93	2.37	4.64	3.77	5.23	9.68	8.02	5.85	9.77	19.35	10.19	6.2	3.56	7.29	16.47	15.52	7.28	16.54	4.59	6.22	5.96	10.98	5.41	8.51	2.33	5.05	3.12	5.12	3.1	7.16	5.25	4.45	6.62	5.78	4.78	9.85	7.64	5.52	10.41	5.6	2.57	2.69	2.31	10.01	6.38	10.73	8.37	9.71	2.24
ATP11A	99.97	27.66	81.14	59.17	28.5	23.17	79.56	56.35	70.12	51.33	26.83	43.84	50.93	87.37	73.75	33.29	19.01	13.46	22.79	45.18	17.13	27.15	11.82	12.68	26.98	51.38	15.46	5.92	10.72	83.68	6.72	17.16	44.06	21.93	36.14	60.01	38.62	12.03	39.43	29.8	101.17	36.35	55.99	49.78	37.1	110.32	51.36	70.48	77.31
ATP11A-AS1	0.1	0.15	0.36	0.18	0.1	0.12	0.18	0.29	0.27	0.37	0	0.34	0.13	0.07	0.2	0.21	0.17	0.2	0.06	0.46	0.19	0.16	0	0	0.28	0.27	0.17	0.33	0.17	0.48	0	0.2	0.07	0.05	0.09	0.26	0.17	0.09	0.17	0.05	0.14	0.32	0.31	0.52	0.63	1.61	0.5	0.27	0.2
ATP11AUN	0.07	0	0.08	0	0	0.08	0.03	0.05	0	0	0	0.09	0.05	0	0.05	0.08	0	0	0	0	0	0	0	0	0.05	0	0	0	0	0	0	0	0	0.03	0.03	0	0	0	0.11	0	0.05	0	0.06	0.11	0	0.08	0	0.03	0.02
ATP11B	35.58	22.42	25.96	23.38	35.8	38.29	3.18	39.18	23.74	47.1	35.53	27.93	29.21	33.22	55.98	41.9	31.69	59.03	8.22	15.48	15.75	9.84	42.9	10.12	12.65	29.24	17.27	25.68	15.01	17.3	29.96	15.49	24.3	13.42	39.84	31.42	37.8	10.48	32.02	17.26	39.88	20.65	18.35	47.61	13.64	36.22	39.7	35.79	27.62
ATP11C	10.51	3.93	11.18	13.72	4.8	16.19	2.91	10.64	6.94	16.1	10.51	9.55	28.04	12.23	11.91	13.1	6.07	5.42	1.33	4.72	4.16	10.69	9.72	5.15	5.16	6.48	3.96	4.06	2.41	3.39	3.88	3.69	5.5	3.4	8.58	1.65	6.27	6.3	9.67	3.58	10.92	3.26	12.09	8.41	6.55	9.67	6.55	7.59	13.24
ATP12A	0	0.02	0.02	0	0.03	0.05	0.1	0.04	0.02	0.03	0.06	0.02	0	0.07	0	1.1	0.09	2.41	0	0.02	0	0	0	0.02	0.03	0.04	0	0	0	0	0.02	0	0	0	0.12	0	0.01	0	0.03	0.03	0.05	0	0.02	0.04	0.05	0.1	0.01	0.22	0
ATP13A1	28.22	61.53	34.79	28.57	99.29	47.53	100.09	65.39	53.15	54.26	46.34	33.52	43.4	34.68	36.07	51.76	81.21	56.07	81.59	66.31	70.16	83.84	62.67	45.87	55.05	57.75	111.23	41.25	33.53	70.9	47.58	55.96	60.34	237.57	95.91	43.59	73.71	62.61	86.26	37.83	64.39	83	91.78	79.69	144.77	112.13	75.5	96.56	99.9
ATP13A2	50.76	44.32	41.98	55.37	63.64	30.48	60.04	52.48	35.24	42.1	36.82	54.96	25.84	44.44	31.24	25.14	61.3	24.93	105.34	49.77	76.47	92.24	24.15	31.96	45.03	104.67	65.15	31.59	23.97	81.9	36.58	43.09	62.03	80.2	42.8	72.02	55.31	51.55	83.22	71.27	118.1	74.55	64.82	69.27	81.1	149.98	66.18	39.2	87.81
ATP13A3	68.96	31.28	60.53	59.03	52.29	49.01	42.65	68.41	35.24	68.53	74.86	58.86	65.58	72.1	79.86	55.9	32.56	20.27	26.21	22.78	21.94	24.09	14.92	17.64	22.69	78.95	25.15	15.88	14.59	22.54	18.66	14.62	21.27	21.83	55.71	32.89	43.43	13.59	51.9	48.46	72.56	23.84	49.17	77	59.84	113.54	68.12	65.61	66.02
ATP13A4	0.41	0.47	0.24	0.06	3.34	0.32	1.51	0.18	2.6	0.62	0.11	3.01	0.13	5.57	6.68	4.04	3.42	13.25	0.92	0.8	0.64	0.01	1.44	0	0.1	0.09	0.07	2.84	0.02	2.89	3.55	1.34	2.37	0.68	0.1	1.77	3.71	0.11	1.82	0.05	0.07	9.12	0.17	1.01	0.38	0.16	7.92	0.2	0.11
ATP13A4-AS1	0	0	0	0	0.07	0	0	0.1	0.16	0.08	0	0.17	0	0.13	0.22	0	0.11	0.22	0	0.06	0.12	0	0	0	0	0	0.09	0.32	0	0.15	0.05	0	0	0.07	0	0	0.15	0.08	0	0	0	0.36	0	0.06	0	0	0.27	0	0.14
ATP13A5	0	0	0	0	0	0	0	0	0.03	0	0	0	0	0.05	1.42	0.02	0.05	0.39	0.11	0	0	0	0	0	0	0	0	0.58	0	0.05	0.46	0.11	0.04	0.02	0.02	0.03	0.04	0	0	0	0	0.03	0	0	0.02	0	0.12	0	0
ATP13A5-AS1	0	0	0	0	0	0	0	0	0	0	0	0.4	0	0	0	0	0	0	0	0	0	0	0	0	0.1	0	0	0	0	0	0	0	0	0	0	0	0	0	0	0	0	0	0	0	0	0	0	0.22	0
ATP1A1	941.2	247.39	702.22	810.33	519.03	305.14	971.17	674.89	523.06	651.53	668.9	676.09	165.87	444.37	515.97	733.04	510.25	439.16	715.81	731.45	1141.73	441.86	173.34	296.5	196.79	894.58	454	156.82	1028.14	528.74	169.9	511.01	519.27	585.05	324.32	1372.04	715.2	303.35	477.66	397.84	968	465.75	1104.99	2093.02	549.14	540.08	476.84	422.28	971.36
ATP1A1-AS1	6.1	1.8	3.13	4.31	3.31	2.6	6.54	5.14	2.61	5.07	4.48	3.61	2.04	2.54	8.78	6.37	1.77	2.74	6.15	5.49	5.4	2.71	2.12	2.89	2.01	10.98	5.6	5.48	2.96	7.2	3.17	1.15	1.85	7.39	2.56	6.34	2.29	4.28	3.78	5.93	4.66	6.05	3.34	4.25	4.22	5.85	2.63	5.76	1.91
ATP1A2	0.09	0.59	2.15	0.17	0.25	0.45	0.54	0.75	0.25	1.7	0.37	0.72	0.52	0.98	3.95	1.15	0.7	2.71	0.6	2.79	0.18	0.83	1.05	0.49	0.07	0.68	0.15	1.51	3.26	0.42	1.18	0.19	0.14	0.52	0.18	2.42	0.82	2.31	1.1	0.19	0.86	1.01	0.09	0.27	1.57	0.12	0.59	1.48	0.12
ATP1A3	0.25	3.47	0.78	8.23	0.89	0.15	1.32	0.56	16.29	0.37	0.35	0.17	0.21	1.03	0.97	0.7	20.02	1.11	2.64	1.32	0.9	2.59	2.02	16.82	0.29	0.51	0.17	1.88	0.72	4.12	2.03	0.63	0.73	1.26	0.57	0.71	7.83	3.18	0.43	0.34	0.61	4.34	0.11	3.01	77.27	0.4	1.36	2.61	0.18
ATP1A4	0	0.09	0.17	0	0.31	0	0.09	0.07	0.01	0.5	0.01	0.08	0.14	0.3	0.13	0.38	0	0.2	0	0	0	0.16	1.17	0	0.12	0.02	0	0	0	0.2	0	0.11	0	0.13	0.24	0.07	0.3	0.79	0.07	0	0.02	0.07	0	0	0	0.21	0.79	0.22	0.06
ATP1B1	455.49	189.5	414.22	310.3	1072.2	434.98	784.32	217.73	1665.59	338.92	409.65	1405.32	321.88	850.57	534.21	556.2	474.71	461.73	358.23	327.59	784.12	255.27	122.98	265.65	146.6	252.75	332.57	348.5	312.28	524.81	340.93	476.95	256.92	314.36	1297.2	328.01	1285.5	131.76	576.18	264.16	919.31	527.73	434.19	785.15	275.45	463.19	362.02	173.02	419.72
ATP1B2	0.41	1.07	2.24	0.96	1.1	1.34	3.21	1.1	17.98	9.89	0.54	1.92	1.22	2.3	7.66	1.94	1.17	2.17	2.34	5.62	1.68	0.81	2.08	0.84	0.62	2.78	0.28	2.26	4.67	0.88	4.05	0.49	0.68	1.59	0.47	2.38	1.99	2.85	3.01	0.56	1.05	1.64	0.64	0.74	2.2	1.29	0.93	4.84	0.55
ATP1B3	397.32	170.8	196.02	199.5	101.86	217.01	247.35	245.89	267.12	170.95	286.4	149.26	215.76	253.22	169.06	297.69	78.33	163.34	74.52	124.39	171.36	117.88	80.4	101.3	69.71	212.11	106.82	33.53	224.9	107.82	33.53	90.34	110.57	215.88	170.52	134.06	356.32	122.16	203.6	88.08	219.25	169.85	241.13	195.02	153.21	109.91	202.38	143.94	187.2
ATP1B4	0.07	0.14	0.81	0.26	0.18	0.62	0.75	0.11	0.16	0.25	0.16	0.92	0.23	0.18	0.23	0.66	0.15	0.13	0.14	0.2	0.17	0.07	0.32	0.04	0.17	0.16	0.3	0.25	0.06	0.11	0.18	0.25	0.1	0.17	0.19	0.1	0.13	0.17	0.23	0.05	0.16	0.04	0.29	0.2	0.2	0.37	0.29	0.51	0.36
ATP2A1	0.22	0.8	0.64	0.44	0.29	0.39	0.71	0.85	0.76	0.35	0.16	0.54	0.31	0.48	0.17	0.94	0.68	0.16	0.34	0.27	0.14	0.74	2.75	0.36	0.35	1.85	0.86	0.37	0.1	0.32	0.16	0.13	1	0.23	1.42	0.12	0.22	0.23	0.86	0.85	1.04	0.13	0.25	0.33	1.19	0.52	0.64	0.62	2.48
ATP2A1-AS1	1.26	0.52	0.75	0.61	1.6	1.84	8.97	1.93	3.57	1.02	1.6	5.76	3.43	1.13	1.7	1.62	1.76	0.82	2.81	3.51	2.72	3.16	0.39	4.05	7.77	25.75	3.41	1.06	1.88	4.49	3.78	4.04	3.24	1.69	4.98	0.68	5.14	2.16	1.25	2.78	3.77	1.61	6.18	0.19	6.24	1.93	2.12	9.13	0.54
ATP2A2	123.6	104.11	171.21	189.02	163.5	127.61	109.19	183.06	178.43	208.79	197.15	180.41	145.21	173.62	167.86	179.89	176.63	190.77	83.77	109.62	105.57	85.25	97.87	79.25	86.13	151.53	140.42	48.98	61.41	131.89	47.31	86.43	99.71	125.42	98.85	224.94	177.91	78.92	194.5	150.93	227.91	159.92	159.75	196.83	179.35	315.04	172.24	169.8	249.24
ATP2A3	16.39	58.46	22.14	9.61	152.42	11.56	8.2	24.52	86.26	72.99	9.96	67.93	20.95	179.9	71.88	36.8	303.48	34.92	112.45	57.24	143.01	39.65	127.44	25.23	22.53	6.26	59.22	247.19	59.34	130.18	229.94	157.04	29.05	43.08	39.92	106.73	76.6	123.39	159.37	3.89	89.07	106.06	24.68	39.89	525.68	50.42	40.81	68.02	15.18
ATP2B1	15.61	10.62	30.48	38.07	18.94	61.19	12.21	44.92	46.54	35.12	27.26	43.72	34.8	38.68	40.34	23.4	20.22	16.81	6.84	12.72	11.5	11.02	76.36	13.76	17.95	15.34	18.18	14.89	27.99	21.13	14.31	15.09	8.66	17.42	17.86	33.36	33.65	13.49	26.24	13.83	35.72	33.82	13.36	33.87	23.7	28.49	19.91	23.65	18.27
ATP2B2	0.02	0.01	0.02	0.02	0.02	0.01	0.02	0.08	0.36	0.03	0.02	0.03	0	0.03	0.06	0.09	0.01	0.02	0.01	0.03	0.01	0.01	0.05	0	0.03	0.02	0	0.03	0.02	0.01	0.04	0.03	0.02	0.01	0.07	0.03	0.04	0.11	0.09	0	0.01	0.03	0.03	0.05	0.04	0.01	0.05	0.17	0.02
ATP2B2-IT2	0	0	0	0	0	0	0	0	0	0	0	0	0	0	0	0	0	0	0	0	0	0	0	0	0	0	0	0	0	0	0	0	0	0	0	0	0	0	0	0	0	0	0	0	0	0	0	0	0
ATP2B3	0.01	0.01	0.02	0	0	0	0	0.01	0.01	0.02	0	0	0.01	0	0.02	0.01	0	0.01	0	0.02	0.01	0	0.01	0	0.07	0.06	0	0.04	0	0	0.01	0	0	0	0.04	0.01	0.03	0.13	0	0.01	0	0	0.02	0	0.18	0	0	0.02	0
ATP2B4	17.31	12.33	30.7	26.95	27.19	13.02	29.7	21.46	37.17	101.53	26.45	7.28	46.55	42.52	57.9	34.92	29.89	32.73	12.43	42.27	17.24	19.23	29.43	16.08	17.24	18.64	13.59	19.36	13.08	20.94	17.65	15.66	36.53	35.79	34.72	62.72	30.4	35.83	58.1	13	46.91	23.36	8.94	32.19	50.83	26.31	33.91	63.4	33.02
ATP2C1	68.87	26.71	52.35	64.42	62.68	98.9	92.62	78.73	48.63	78.19	79.22	63.58	88.61	55.78	67.98	76.03	43.23	52.13	32	40.09	41.26	40.24	79.57	39.47	35.04	85.57	51.23	27.01	20.63	47.15	28.17	30.12	77.2	87.06	37.95	71.07	74.5	29.69	81.67	62.26	79.4	38.72	36.34	111.94	54.28	100.78	84.99	89.44	81.93
ATP2C2	13.26	5.01	39.97	0.97	79.97	5.37	2.39	75.49	5.23	20.78	49.09	42.65	27.68	8.84	11.57	7.2	24.32	11.76	4.84	23.49	120.97	0.2	32.4	3.3	14.25	14.43	85.8	4.16	27.57	26	7.68	21.76	9.49	37.75	8.07	2.6	43.95	20.87	42.58	27.07	35.05	8.45	31.56	124.89	29.12	31.55	0.16	20.1	0.2
ATP4A	0	9.72	0.05	0	0	0	0	0.02	0.02	0	1.46	0.02	0.02	0	307.81	0.1	486.18	0	1.42	0	0.03	0.04	0.14	0.07	0.01	0.61	0	1199.65	0.64	9.47	693.5	23.08	0.02	0.06	0.37	0	95.18	0.19	0.02	0	0.15	0.19	0	0	0.05	0.17	0	0.03	0.01
ATP4B	0	25.14	0.12	0.07	0	0	0.05	0	0.4	0.08	5.21	0	0	0.17	712.01	0.22	645.07	0	2.93	0	0	0	0.18	0	0.07	0.06	0.04	1849.12	1.82	40.36	1286.57	36.62	0	0.16	1.07	0	223.92	0.24	0	0	0.16	1.44	0.05	0.06	0.12	0.13	0.04	0	0.04
ATP5A1	448.84	304.35	260.28	393.43	646.39	601.66	931.97	413.77	740.9	390.91	767.44	484.54	261.86	301.86	501.08	380.37	638.81	393.29	423.61	317.46	650.82	456.69	277.51	409.74	229.47	466.27	706.31	421.75	543.78	469.68	416.72	295.14	263.45	553.95	254.65	591.14	244.69	449.06	512.4	130.18	220.85	433.35	537.87	333.01	359.69	245.54	401.9	466.32	318.72
ATP5B	910.08	712.05	1078.69	1698.72	1232.69	1220.31	932.26	1437.79	1431.49	644.21	1673.86	1245.5	1001.62	820.08	842.4	1120.72	1033.67	761.67	818.83	617.29	1275.59	930.58	766.5	756.17	611.76	821.98	1085.03	577.67	872.44	904.88	591.71	597.62	690.13	1155.13	1344.35	768.42	666.51	787.86	826.77	830.87	976.54	876.79	800.97	1003.65	791.58	777.64	574.3	613.08	1086.83
ATP5C1	666.37	370.8	507.68	994.57	411.97	466.66	572.84	628.53	606.67	325.37	692.53	563.4	489.05	222.19	542.48	524.39	391.51	278.69	373.19	326.67	506.67	383.57	271.87	498.24	321.14	350.41	463.78	282.94	518.97	257.49	293.34	259.74	330.92	411.48	558.05	405.16	259.45	331.26	309.59	342.23	339.18	398.42	262.51	425.46	427.54	338.1	220.31	349.21	412.08
ATP5D	172.88	737.11	193.69	346.76	429.82	286.41	292.36	217.95	184.3	175.44	391.34	194.36	328.12	157.66	200.94	312.65	487.67	257.92	435.63	416.41	642.91	713.86	614.15	573.39	619.23	341.23	822.93	486.96	911.63	294.35	545.02	726.06	482.73	399.19	680.28	262.07	431.43	444.62	384.85	176.53	281.97	404.9	580.43	127.92	307.91	159.22	234.23	205.79	316.1
ATP5E	1838.84	884.42	1668.15	1117.68	672.47	868.87	3369.29	797.49	1103.7	825.67	761.19	1656.13	1347.18	1561.57	1099.67	891.39	735.18	623.72	880.16	1094.84	647.91	717.59	1082.77	1287.25	1247.77	1140.38	808.39	1099.98	943.82	1319.85	999.48	1057.59	1409.73	1202.19	967.89	779.03	647.27	805.62	694.94	723.65	1190.49	673.21	894.3	801.67	913.45	985.98	1273.4	740.37	1267.94
ATP5EP2	0.24	0.86	1.32	0.44	0.21	1.83	3.54	0.77	1.86	0.67	2.79	2.18	1.99	0.68	0.53	2.16	0	0.23	0.95	0.31	0.62	2.95	0	5.86	0.6	0.31	6.77	0.87	2.47	0.88	0	0.78	0.92	1.29	0.78	0	0.2	0.26	0	0	0.45	0.67	0.77	0.63	0.67	0.23	0.73	0.5	0.96
ATP5F1	307.12	161.55	182.26	359.97	214.5	254.95	154.67	221.09	288.85	172.22	364.04	192.51	239.34	124.87	299.69	249.01	214.23	147.96	148.22	157.7	240.79	151.24	122.74	171.96	110.68	184.08	267.24	157.39	286.55	242.21	151.27	146.85	177.72	232.41	115.87	189.05	106.45	166.73	173.39	144.69	106.55	145.85	131	242.37	135.17	159.1	106.8	152.14	167.15
ATP5G1	394.19	278.72	187.06	494.88	267	199.66	478.35	240.16	278.21	132.17	401.37	457.65	321.45	311.41	309.5	261.22	279.82	178.77	237.13	287.82	582.16	306.18	268.16	270.7	335.37	520.32	305.31	274.6	463.17	447.41	294.14	289.66	350.2	387.19	177.69	284.71	242.51	246.04	255.36	126.44	309.12	251.06	290.95	380.47	326.31	228.53	288.28	267.79	353.19
ATP5G2	338.12	742.09	486.73	485.51	506.02	330.6	353.38	276.39	508.81	372.33	405.54	508.92	558.78	403.2	832.87	314.68	407.04	344.28	496.69	590.75	537.12	437.27	718.44	433.87	611.64	401	730.93	637.48	701.83	565.81	700.46	587.08	448.83	664.64	445.44	524.34	573.21	624.48	414.66	489.97	583.19	654.84	338.48	467.08	547.5	428.08	406.19	357.48	294.15
ATP5G3	234.92	226.84	143.88	194.1	195.83	169.24	205.31	96.31	152.36	65.74	240.21	177.18	156.62	134.11	113.04	178.59	148.59	88.71	200.95	105.29	104.58	111.33	123.22	157.01	78.39	70.01	169.57	116.44	314.19	138.06	111.21	151.34	163.62	138.56	175.87	130.49	91.65	121.24	118.76	59.71	69.83	122.12	130.35	120.99	99.49	79.09	88.65	83.78	125.78
ATP5H	680.85	552.91	255.74	357.59	478.75	358.82	1190.64	279.12	588.82	274.79	561.26	554.17	303.95	781.28	466.85	479.93	332.62	285.74	295.98	437.51	399.72	397.24	406.98	520.46	410.87	541.44	338.28	315.46	531.16	431.76	366.14	302.21	425.63	388.7	451.16	378.16	393.53	292.66	348.15	396.55	201.24	438.05	370.9	321.51	265.18	275.12	345.3	245.99	436.36
ATP5I	495.01	223.53	268.01	255.58	378.89	357.26	817.98	202.53	245.54	260.17	492.97	316.96	214.66	675.55	272.73	385.64	512.62	334.48	318.1	382.68	630	416.47	792.98	731.55	508.59	324.27	576.68	544.76	783.58	458.53	454.95	602.2	504.42	662.29	333.6	313.82	415.19	457.18	364.96	203.23	331.26	389.37	298.75	278.87	436.73	274.4	299.46	334.11	350.42
ATP5J	408.05	300.34	215.99	222.17	260.54	230.52	381.18	166.41	305.17	192.66	379.36	242.41	180.14	259.08	237.77	249.51	299.69	198.66	246.88	245.99	292.53	268.34	294.6	407.84	218.9	239.09	279.81	437.04	729.28	257.63	356.19	323.84	344.74	310.71	232.31	239.06	225.39	284.23	252.41	114.16	164.92	278.38	323.63	253.06	353.93	295.81	236.9	293.98	297.38
ATP5J2	1526.14	744.77	471.62	1142.04	669.13	455.01	507.63	533.52	572.7	363.29	622.09	772.47	803	456.12	560.37	548.4	602.66	505.89	1167.38	621.6	691.84	682.33	751.79	892.11	1059.44	1460.79	979.67	668.12	1032.12	664.27	604.65	857.21	894.53	918.74	966.28	623.23	1935.08	565.42	534.01	630.13	796.67	919.39	1063.43	628.26	722.53	453.3	793.53	406.35	878.01
ATP5J2-PTCD1	0	0	0.34	0	0	0	0	0	0	0.45	0	0	0.49	0	0	0	0	0.58	0.4	0	0	0	0	0	0	0	0.48	5.31	0	0	0	0	0	0	0.33	0	0	0	0	0	0	0	0	0	0	0	0	0	0
ATP5L	306.72	173.76	281.23	222.11	171.18	161.83	160.6	192.1	213.67	160.19	216.52	241.78	248.2	215.72	216.24	225.16	220.14	144.99	101.68	129.12	220.59	184.94	264.27	270.63	142.48	161.15	191.41	235.41	311.39	235.2	230.62	243.7	272.56	202.1	257.02	194.32	184.81	194.82	164.44	151.11	276.76	157.59	294.38	124.4	209.31	137.21	225.41	154.1	233.14
ATP5L2	0	0.11	0.26	0.36	0.15	0.09	0.66	0.28	0.34	0.27	0.07	0.69	0.19	0.15	0.16	0.19	0.1	0	0.34	0.23	0.5	0	0	0	0.15	0.23	0	0	0	0.17	0.21	0.15	0	0.08	0.19	0.25	0	0.26	0.09	0	0.08	0.16	0.56	0.58	0.49	0.09	0.87	0.41	0.55
ATP5O	534.68	454.96	293.78	376.45	358.59	414.3	599.39	217.09	460.77	261.37	504.6	318.43	479.24	296.92	379.45	349.39	481.43	248.51	230.95	247.92	446.96	344.4	315.34	391.11	207.64	181.95	460.99	471.01	765.21	406.48	462.44	304.32	452.57	467.66	271.68	305.04	342.03	370.02	278.11	123.51	186.13	399.16	430.67	308.13	258.74	294.24	344.58	261.32	566.96
ATP5S	17.8	7.82	6.48	6.54	7.2	8.9	8.38	13.17	12.53	7.99	8.97	10.36	10.69	8.31	14.42	4.41	7.3	8.64	6.24	5.96	8.68	5.34	4.47	4.74	6.03	4.79	12.6	5.64	6.71	5.98	7.74	4.65	6.5	4.9	4.38	4.54	5.59	5.4	7.6	7.79	7.18	4.37	13.41	12.31	7.78	5.65	6.79	7.41	11.32
ATP5SL	49.81	64.55	80.75	113.2	68.02	37.2	47.67	42.45	87.68	52.51	46.72	49.13	40.51	66.55	40.35	55.4	62.52	51.15	88.08	73.51	105.76	63.8	84.63	66.08	69.26	41.91	100.82	40.56	78.27	47.08	56.1	46.64	117.74	132.26	67.34	130.71	102.75	67.2	64.37	99.35	24.82	59.19	63.33	62.3	83.44	94.68	100.76	78.9	54.64
ATP6AP1	111.87	223.74	162.72	123.56	272.9	148.3	285	119.58	318.25	184.96	154.64	124.01	254.38	183.88	152.71	120.73	121.07	196.92	270.53	216.88	174.2	348.31	102.96	165.19	154.26	617.47	213.33	119.71	105.99	218.25	145.75	157.49	154.64	186.14	280.41	299.43	262.24	241.68	198.73	315.6	218.44	288.42	407.92	150.86	551.88	447.71	266.69	190.96	185.27
ATP6AP1L	0.63	0.8	0.86	0.74	1.06	1.14	3.79	0.45	0.4	1	0.81	2.37	1.4	0.6	1.78	2.74	0.42	1.2	0.39	1.5	0.59	1.11	1.2	0.92	1.08	0.17	1.68	0.72	0.29	0.48	0.6	0.68	0.63	0.76	2.29	0.77	0.9	0.59	0.34	1.64	0.24	0.45	1.02	1.13	1.12	1.01	1.22	1.54	0.65
ATP6AP2	306.36	70.84	180.15	138.1	142.72	136.63	249.76	170.24	132.09	228.03	170.98	138.17	254.6	318.23	174.53	185.76	73.02	114.79	110.27	134.64	102.58	215.35	85.04	124.29	92.95	277.16	80.49	53.73	63.19	122.77	75.02	75.34	117.91	96.93	147.38	161.05	227.52	131.31	156.54	154.74	119.31	179.49	151.55	122.59	307.26	267.81	194.56	149.37	190.78
ATP6V0A1	32.89	32.67	60.84	48.76	55.6	30.64	70.15	38.22	58.83	56.15	44.45	41.36	43.08	46.52	54.62	38.75	29.97	40.31	29.42	45.09	37.09	28.73	22.2	23.08	18.55	50.52	39.03	25.95	41.48	28.63	23.65	26.72	26.46	33.74	31.14	108.24	69.25	36.18	46.22	60.48	67.66	42.97	51.91	40.99	75.78	48.67	43.05	43.81	37.88
ATP6V0A2	9.66	6.31	12.39	10.35	7.48	10.78	8.14	16.64	10.63	14.53	9.91	14.21	9.83	8.31	23.46	11.57	11.9	6.71	4.68	6.18	9.77	8.78	9.11	4.44	7.24	10.77	6.1	7.99	8.79	10.87	7.33	6.83	6.61	9.17	9.02	5.65	8.41	7.07	9.83	5.68	12.05	6.37	15.36	20.95	6.09	20.62	8.19	12.27	11.66
ATP6V0A4	0.34	0.03	0.17	0.05	0	0.1	25.34	0.15	0.05	0	0	0.86	0.02	2.02	0.05	2.16	0.03	5.58	0.04	0.18	0	0	0.06	0.15	0.31	0.19	0.04	0.23	0.11	1.08	0.14	0.03	0	0.06	0.02	0	0.08	0.07	0.04	0.33	1.36	0.2	0.02	16.28	0	3.13	0.07	0.05	0.04
ATP6V0B	200.46	293.2	145.27	270.11	257.56	133.25	303.75	168.96	210.97	154.75	183.89	177.54	109.51	230.7	166.74	130.63	331.81	120.25	308.27	173.7	210.73	249.35	185.39	366.61	202.83	308.29	244.87	208.05	168.77	344.72	197.85	241.81	224.53	308.86	128.11	284.03	200.63	244.9	213.86	238.97	85.64	249.3	238.84	156.99	513.05	236.14	234.78	128.92	148.95
ATP6V0C	461.62	902.36	352.66	607.11	813.49	421.43	333.57	365.69	384.36	624.75	489.95	359.57	372.31	632.11	463.76	476.37	684.44	705.51	1035.98	971.39	796.08	724.7	566.99	994.4	689.88	1302.92	697.23	592.02	709.43	713.98	710.61	1009.27	779.69	749.43	503.53	972.42	769.99	845.52	619.57	736.17	493.63	673.36	514.2	351.43	1054.98	305.81	689.05	460.66	476.71
ATP6V0CP3	0	0	0	0.1	0	0.13	0	0	0	0.12	0	0.27	0	0.1	0.23	0.13	0	0.11	0.35	0.46	0.2	0	0.32	0	0.2	0.62	0.11	0	0	0.57	0	0	0.14	0.33	0	0.34	0.59	0.52	0.47	0.11	0.11	0	0	0.32	0.5	0.24	0.33	0.69	0
ATP6V0D1	115.71	162.75	143.48	179.2	137.84	94.97	109.2	125.44	173.47	215.27	185.95	116.2	98.25	92.56	141.54	124.4	209.18	154.7	132.82	212.97	203.76	176.84	130.17	168.74	119.02	175.36	155.57	146.67	210	194.37	169.8	188.81	142.92	187.11	88.52	276.6	230.07	240.1	201.66	139.27	86.76	185.23	155.79	150.18	188.82	204.18	171.7	148.57	111.2
ATP6V0D2	4.76	0.82	9.35	3.46	1.26	0.53	0.38	6.63	1.55	1.64	6.05	0.66	1.48	0.62	3.45	1.47	0.84	0.51	0.39	4.02	9.44	3	0.58	0.53	1.29	0.21	0.67	2.04	0.28	1.22	0.25	3.99	4.44	0.71	0.14	0.4	0.52	2.61	3.3	0.79	0.46	1.58	0.35	1.1	2.73	0.5	8.68	2.83	1.54
ATP6V0E1	445	448.55	320.55	384.78	376.39	403.27	539.76	420.12	377.65	518.99	473.61	243.38	381.9	385.85	413.17	514.85	285.49	402.02	285.79	460.19	374.8	369.64	288.2	478.52	351.17	207.13	278.59	357.44	355.03	409.63	446.86	378.27	304.01	322.58	606.83	526.78	395.22	508.11	379.76	427.17	303.22	178.85	422	194.37	394.65	193.35	518.79	341.45	221.65
ATP6V0E2	21.28	22.6	5.65	9.97	8.2	3.89	33.38	3.11	24.17	6.88	4.05	6.62	8.15	5.52	14.26	10.36	22.02	6.95	77.68	25.89	7.13	32.94	11.7	16.89	34.55	142.48	35.73	11.69	6.25	36.74	15.95	10.05	15.32	26.8	15.29	46.89	35.53	27.9	11.29	34.29	8.29	41.79	27.54	20.38	68.3	23.86	9.84	11.34	11.59
ATP6V0E2-AS1	0.77	0.17	0.08	0.13	0.12	0.12	0.7	0.09	0.73	0.27	0.11	0.34	0.2	0.28	0.51	0.34	0.44	0.3	2.08	0.62	0.27	0.22	0.28	0.29	0.29	1.34	0.16	0.54	0.21	0.53	0.26	0.07	0.17	0.37	0.17	0.79	0.35	0.83	0.24	1.18	0.29	0.62	1.1	0.86	1.15	1.37	0.56	0.47	0.07
ATP6V1A	52.18	19.36	34.95	29.51	49.43	47.86	50.2	35.21	46.09	47.75	39.29	32.99	28.54	39.77	48.38	50.17	25.76	37.12	19.45	23.41	22.68	26.37	17.48	22.34	17.42	45.68	21.19	18.47	14.36	26.42	19.7	17.07	21.99	22.15	20.22	48.95	43.7	23.4	40.29	32.32	25.06	24.19	17.26	43.9	36.8	49.04	49.97	66.45	40.85
ATP6V1B1	0.4	0.04	2.03	0.05	0.22	0.19	2.9	0.38	2.9	0.5	0.18	0.21	0.06	3.15	0.2	0.46	0.14	1.15	0.51	0.58	0.66	0.07	0.04	0.28	0.19	2.5	0.09	0.12	0.17	3.38	0.19	0.38	0.73	0.12	4.5	0.5	0.43	0.25	0.06	0.91	0.37	0.15	0.03	0.74	0.18	1.29	0.03	4.3	0.06
ATP6V1B1-AS1	0.07	0.11	0.26	0	0	0.27	0	0.41	0.35	0.09	0	0.1	0	0.29	0	0.19	0	0.41	0.07	0	0	0.32	0	0.37	0.68	0.19	0.07	0	0	0	0	0.44	0	0.2	0.31	0.33	0.18	0	0	1.51	0.17	0.17	0.65	0.23	0.24	0.36	0.08	0.57	0.65
ATP6V1B2	50.55	42.27	67.4	77.05	104.9	99.07	51.62	77.32	115.13	132.92	110	74.58	103.06	58.26	80.74	111.46	47.78	61.35	35.27	52.61	75.96	85.77	53.59	69.24	37.58	113.65	87.91	34.17	55.76	35.8	29.97	54.24	57.27	43.22	64.09	96.42	72.48	80.48	102.06	54.31	27.4	59.61	44.37	77.7	99.93	172.93	100.95	93.96	66.81
ATP6V1C1	52.18	15.79	55.23	28.22	34.33	38.43	65.99	75.91	70.78	47.02	36.35	43.68	45.28	61.05	41.91	33.61	15	17.04	48.48	17.3	17.8	15.48	17.26	19.5	82.36	23.78	29.53	10.8	13.83	22.03	11.18	13.31	14.64	28.51	27.17	41.47	21.45	16.55	36.18	36.48	33.04	15.13	33.47	46.67	19.69	70.41	27.67	27.04	20.59
ATP6V1C2	6.66	0.52	4.58	1.78	4.64	6.85	6.04	5.55	2.37	2.06	1.98	1.89	14.4	5.82	5.73	3.71	0.9	8.9	1.08	1.02	5.67	0.31	0.44	0.43	7.41	0.8	1.24	0.58	0.25	2.48	0.25	2.88	0.38	5.39	3.36	2.89	0.8	2.57	0.42	0.15	8.44	2.47	1.7	18.76	1.63	8.5	0.73	2.94	0.54
ATP6V1D	61.8	49.11	73.53	67.37	62.9	84.32	106.73	90.31	103.26	73.99	95.13	81.87	71.71	88.69	82.75	82.2	77.44	106.67	33.54	55.45	47.92	39.41	34.38	60.68	60.77	34.71	45.61	43.58	73.02	48.48	42.85	55.39	66.62	37.28	70.06	55.75	55.77	44.78	69.47	57.98	56.38	41.4	54.47	56.31	60.13	70.1	51.87	55.57	73.78
ATP6V1E1	241.74	133.42	185.04	188.99	180.22	155.11	123.76	197.03	161.25	216.27	224.24	168.11	208.86	263.95	283.16	225.87	143.67	176.17	126.39	159.53	141.68	132.18	113.72	166.8	121.03	81.96	102.07	119.67	111.42	99.73	123.78	125.06	145.44	95.36	140.75	359.26	250.99	157.92	178.85	281.86	132.22	108.69	151.78	177.46	179.26	168.17	129.94	110.51	119.2
ATP6V1E2	0.97	0.74	0.3	0.69	1.59	3.1	3.66	2.65	0.87	1.36	2.82	5.22	2.07	1.04	3.34	2.62	0.72	1.19	2.38	1.47	0.52	2.42	0.38	1.3	0.91	6.04	1.32	0.95	0.08	1.82	1.23	0.63	1.15	2.36	2.57	2.33	1.21	1	1.58	1.52	1.67	3.54	3.26	2.46	1	1.34	1.97	1.79	0.71
ATP6V1F	435.01	428.57	161.47	245.38	252.28	155.26	201.71	195.65	213.65	235.48	219.13	306.34	279.62	151.57	206.7	246.78	199.67	328.2	391.67	310.77	229.71	395.29	343.61	512.3	490.22	741.05	315.3	256.52	187.94	235.32	259.57	327.48	356.31	305.4	252.07	366.27	319.24	413.03	260.28	464.99	405.87	230.74	406.56	160.49	368.74	286.62	501.17	229.71	340.2
ATP6V1G1	157.33	105.92	107.21	99.32	139.41	184.79	241.38	166.29	201.49	156.27	142.99	294.93	115.83	176.22	201.78	247.57	130.25	146.78	122.18	114.76	83.66	107.83	99.43	167.99	84.03	259.08	95.53	127.56	79.51	139.77	142.5	128.62	98.76	101.58	94.16	86.24	120.35	96.59	112.39	82	73.41	133.8	165.43	75.33	118.83	178.76	151.68	106.62	108.14
ATP6V1G2	0	0.48	0.39	0.25	0.77	0.09	3.71	0.38	0.42	1.04	0.41	0.44	0.08	0.77	2.42	0.46	0.32	0.39	0.31	0.63	0.51	0.34	0.69	0.32	0.54	5.49	0.26	0.51	0.48	0.74	1.44	0.53	0.21	0.37	0.5	0.51	0.64	1.88	0.4	0.61	0.34	0.46	0.82	0.24	11.64	1.03	0.31	1.35	0.39
ATP6V1G2-DDX39B	0	0.64	0	0	1.14	0.42	1.58	0.65	0.39	2.29	0	0.47	0	1.06	0	0.44	0.65	1.13	0	0.57	0.93	0	4.08	1.25	0.77	10.57	0.87	0	0	1.09	2.13	0	1.05	0.41	1.15	0.43	0.94	4.96	1.3	0.4	0	0.82	2.71	0	8.49	1.69	0	3.12	0
ATP6V1G3	0	0	0	0.38	0	0	0	0	0	0	0	0.13	0	0	0	0.25	0	0	0	0	0	0	0	0	0.1	0	0	0	0	0	0	0	0	0	0	0	0.09	0	0	0	0	0	0	0	0.16	0.11	0.52	0.22	0
ATP6V1H	67.27	24.48	18.33	32.02	53.91	63.64	38.42	27.75	83.14	48.93	38.16	43.37	54.12	33.97	46.75	48.49	29.75	49.61	64.01	31.8	30.3	33.96	30.78	43.23	27.88	46.54	49.66	26.91	18.67	29.88	24.26	30.66	29.02	58.79	60.2	48.18	31.96	29.92	52.86	34.27	19.21	33.38	36.75	29.21	55.44	73.23	37.56	37.15	37.2
ATP7A	8.41	2.81	9.1	7.49	4.25	7.35	10.4	5.19	9.43	10.62	6.63	7.31	6.8	9.1	13.1	7.99	5.98	8.24	2.52	4.28	3.16	5.65	3.32	3.56	1.93	5.87	2.94	4.92	3.9	3.3	6.62	3.65	3.84	3.49	5.53	9.13	8.48	3	7.71	8.9	17.19	2.24	16.78	3.86	5.03	20.13	7.67	5.47	7.88
ATP7B	14.5	2.25	16.19	10.18	36.03	7.22	16.64	30.29	4.24	18.29	25.51	27.18	2.14	30.27	11.17	13.91	11.9	4.16	9.36	19.03	26.24	3.95	1.58	1.74	7.71	27.77	13.83	4.09	20.9	30.83	6.55	10.49	8.31	15.48	9.07	1.79	33.53	6.4	33.81	1.12	17.05	14.76	7.19	54.95	5.66	13.24	9.68	28.09	28.02
ATP8A1	2.73	1.73	9.36	3.68	1.27	102.09	2.08	23.52	12.98	9.11	5.6	7.57	10.43	6.2	16.69	7.25	9.63	3.78	0.84	1.13	8.18	2.97	11.32	2.1	0.81	1.08	11.2	8.66	5.03	4.46	6.72	4.19	1.22	9.16	3.37	0.99	2.89	4.1	9.39	0.5	3.48	2.48	1.96	14.35	13.21	2.44	4.26	19.67	5.27
ATP8A2	0.06	0.15	0.6	0.14	0.07	0.09	0.3	0.16	0.19	0.15	0.11	0.03	0.1	0.21	0.69	0.16	0.35	0.06	0.07	0.37	0.1	1	0.13	0.02	0.08	0.11	0.01	1.03	0.1	0.1	0.75	0.06	0.04	0.13	0.12	0.21	0.22	0.2	0.37	0.58	0.14	0.06	0.01	0.1	0.58	0.11	0.1	1.02	0.06
ATP8B1	82.72	35.97	44.3	32.85	116.27	33.98	47.49	94.48	98.5	82.05	126.33	70.65	51.05	48.97	89.96	36.86	64.21	32.97	28.18	31.72	85.88	14.74	17.68	6.74	12.72	120.39	127.99	40.2	57.07	64.08	50.95	46.42	19.01	64.95	19.31	54.18	59.22	19.57	73.92	35.79	53.77	72.87	80.22	90.33	38.23	82.93	28.02	97.38	63.13
ATP8B2	1.94	7.9	5.8	3.48	11.54	5.25	4.45	10.43	18.33	37.94	6.73	7.49	2.75	16.07	19.78	9.8	15.13	8.08	4.95	18.56	9.75	8.91	13.48	5.04	3.75	8.92	1.75	15.79	13.08	8.47	13.44	7.87	4.09	11.97	4.85	9.7	15.69	30.45	26.9	6.18	5.67	7.25	2.57	9.5	30.07	9.91	18.4	27.9	3.69
ATP8B3	0.17	0.19	0.11	1.53	0.25	0.64	1.23	0.25	0.36	0.8	0.21	0.11	0.2	3.62	0.42	0.3	0.15	0.24	0.3	0.22	0.12	0.54	0.29	0.89	1.94	0.11	0.19	0.23	0.06	0.39	0.81	0.26	0.2	0.21	8.6	0.91	0.46	0.48	0.73	1.01	0.49	2.37	0.9	0.3	0.33	0.32	0.28	0.58	0.73
ATP8B4	0.97	0.75	2.05	1.27	0.76	0.91	1.4	3.91	2.22	6	3.39	0.69	2.21	2.48	5.58	3.01	0.87	1.17	0.94	1.26	1.42	2.01	1.18	0.81	0.24	0.19	0.3	0.8	0.7	0.77	0.77	0.74	1.13	0.81	0.65	0.59	2.33	2.31	1.21	0.7	0.48	0.37	0.18	1.12	1.93	1.03	2.56	1.56	0.47
ATP8B5P	0.33	0.03	0.32	0.22	0.23	0.61	0.59	0.77	0.77	0.21	0.18	1.37	0.7	0.36	0.55	0.71	0.21	0.18	0.19	0.47	0.31	0.3	2.51	0.32	0.17	0.16	0.14	0.58	0.27	0.34	0.59	0.04	0.49	0.32	0.91	0.42	0.27	0.14	0.45	0.4	0.84	0.09	0.45	0.68	0.2	0.38	0.59	0.47	2.06
ATP9A	67.73	30.75	97.87	30.26	92.23	7.09	139.09	63.1	43.84	39.61	22.74	60.62	57.37	58.5	76.2	32.61	23.62	24.44	42.24	35.8	18.41	28.28	5.39	6.07	8.61	35.24	30.69	17.27	21.55	101.86	25.19	17.65	40.7	36.73	32.77	62.39	58.16	12.19	51.02	24.9	79.13	49.68	88.14	59.3	62.73	69.1	31.92	55.15	21.11
ATP9B	8.65	13.7	5.7	16.02	8.2	9.87	13.12	9.65	7.32	14.91	13.13	10.31	8.05	6.89	14.1	8.07	24.55	11.17	6.75	10.32	9.92	13.83	6.35	8.37	6.01	9.27	17.59	10.34	3.74	25.26	11.71	7	9.17	11.48	6.69	10.27	11.68	9.07	15.12	8.66	4.03	11.78	17.53	5.91	10.42	18.57	11.16	10.48	8.19
ATPAF1	80.78	40.48	30.97	66.8	49.11	51.82	140.18	40.17	87.76	44.84	68.28	68.41	50.24	52.88	93.37	61.39	42.42	44.17	45.05	33.86	58.52	47.25	36.52	63.36	28.92	75.75	51.44	45.76	29.73	55.08	41.73	28.67	44.72	50.05	20.1	50.25	51.78	36.08	36.44	49.34	47.44	53.14	36.71	62.07	64.33	66.34	52.45	54.53	39.22
ATPAF2	10.36	22.79	15.01	20.48	23.8	16.37	14.45	16.49	24.52	15.03	19.99	22.43	5.61	18.21	13.92	12.75	18.95	19.77	15.9	17.73	27.46	25.86	30.34	26.26	39.98	22.45	43.08	15.82	22.34	17.98	25.42	21.07	24.11	27.09	12.35	21.83	16.49	28.57	21.06	14.79	17.19	15.35	10.14	6.77	27.78	16.45	25.53	18.82	30.05
ATPIF1	292.61	458.18	251.33	382.81	383.84	300.77	293.16	307.48	355.02	279.71	500.36	395.29	480.33	257.14	352.13	194.89	334.99	171.58	476.98	358.39	486.68	382.14	393.23	519.68	318.88	240.48	357.81	363.04	616.77	446.64	374.27	419.73	451.01	526.74	241.67	312.47	548.43	280.76	351.28	141.62	277.49	269.16	459.32	420.26	273.38	80.04	188.85	319.38	365.72
ATR	22.6	4.26	10.74	14.86	6.17	7.77	19.35	16.63	8.07	13.28	9.94	14.48	18.5	13.45	14.98	19.17	5.6	8.29	3.05	4.51	4.29	4.89	6.12	3.17	3.76	9.44	5.7	3.15	2.02	5.35	2.45	3.38	6.08	7.65	8.83	5.69	7.26	4.17	9.41	8.26	14.45	4.17	16.39	19.21	3.95	18.35	10.82	13.04	13.1
ATRAID	297.28	247.23	186.62	241.67	239.8	236.6	622.93	241.87	309.86	227.85	181.49	296.01	208.66	218.62	294.39	282.28	164.08	145.15	346.75	313.69	210.23	167.51	195.58	209.84	303.79	728.36	234.43	215.44	178.19	293.6	268.49	192.36	195.15	227.83	321.16	479	186.33	240.01	196.62	296.07	152.42	255.86	123.37	229.54	277.32	396.55	289.66	185.16	166.81
ATRIP	7.66	6.26	4.81	11.5	12.88	9.99	9.1	7	9.5	6.48	9.1	8.76	8.54	7.83	5.34	5.94	8.4	9.23	9.54	6.35	7.87	9.09	7.92	5.46	7.23	11.25	9.44	4.2	3.03	7.01	4.42	3.58	8.42	5.13	6.52	5.54	5.85	7.25	8.99	5.87	15.55	14.72	13.64	6.99	9.23	10.89	11.73	12.63	9.63
ATRN	26.3	26.5	56.25	37.16	71.18	18.65	76.1	36.46	42.2	52.1	44.1	49.3	33.34	47.58	90.24	23.9	39.66	95.56	26.55	36.51	48.02	18.1	24.2	10.98	17.8	62.91	67.9	20.85	82.49	40.09	27.18	20.59	27.31	33.92	14.24	39.65	77.55	20.85	45.19	40.34	23.06	89.38	27.95	61.23	40.16	95.73	102.2	64.97	69.91
ATRNL1	0.09	0.09	0.06	0.01	0.24	0.01	0.28	0.48	0.88	0.35	0.03	0.2	0.2	0.31	0.45	0.29	0.27	0.49	0.05	0.18	0.24	0.04	0.48	0.67	0.03	1.29	0.07	0.29	0.37	0.42	0.18	0.19	0.18	0.45	0.08	0.18	0.52	0.4	1.5	0.13	0.11	0.33	0.08	0.47	0.05	0.28	0.1	1.19	0.18
ATRX	15.59	7	26.12	13.94	14.36	32.75	31.6	18.4	32.5	32.41	21.68	18.86	27.67	28.56	37.81	24.38	13.12	15.62	8.73	17.04	11.61	19.15	10.21	10.19	6.88	23.24	9.32	15.45	8.56	12.7	17.01	8.88	11.75	9.87	18.86	15.69	21.46	13.81	23.82	14.52	15.37	12.2	24.35	12.02	18.55	37.56	32.67	34.75	40.27
ATXN1	6.75	4.59	8.17	7.95	8.77	6.32	22.41	8.23	5.19	21.31	6.08	4.69	7.01	19.36	15.26	9.56	7.06	8.27	5.44	9.49	3.59	6.06	5.54	3.35	5.73	4.17	3.16	8.52	6.99	7.45	6.83	6.23	3.78	5.38	4.26	7.65	8.43	9.07	12.87	4.34	5.58	3.45	4.7	7.78	6.65	16.62	8.56	15.56	7.16
ATXN10	94.46	14.24	38.33	58.33	50.9	77.64	184.52	47.21	63.4	54.3	70.7	63.99	58.92	97.33	51.96	57.66	44.54	56.33	39.97	52.6	49.9	43.5	46.02	31.9	31.44	88.5	62.42	30.79	16.98	29.89	29.52	30.16	59.15	45.49	41.02	87.71	67.13	43.4	62.54	32.02	30.98	61.07	25.2	77.98	48.95	42.34	34.77	52.39	56.67
ATXN1L	19.85	9.68	22.46	15.67	15.78	12.5	18.84	19.21	18.43	27.02	13.81	19.4	16.12	17.19	18.47	12.99	13.78	15.89	8.38	15.83	12.4	14.98	16.03	7.06	7.02	23.99	11.79	10.68	10.63	15.99	10.34	5.72	9.96	13.89	9.02	19.19	22.17	13.57	19.04	15.74	14.58	14.74	13.34	29.51	12.01	28.99	14.56	21.74	12.94
ATXN2	21.98	16.96	34.71	33	22.09	36.45	14.29	35.98	33.37	33.02	23.64	32.89	35.61	25.72	33.18	30.89	16.93	18.89	22.96	15.39	15.69	13.3	21.68	18.91	18.8	17.91	17.74	12.87	12.8	15.35	12.42	14.38	21.93	23.83	17.2	28.7	22.01	17.33	23.49	22.72	36.38	16.13	19.71	31.53	24.99	35.58	21.34	39.83	31.56
ATXN2L	77.92	91.01	104.29	94.28	150.48	88.42	115.78	128.45	112.36	85.36	72.93	100.7	81.73	109.08	62.37	88.37	81.73	89.75	124.4	70.6	95.09	134.62	104.08	71.07	145.16	167.59	105.21	58.59	43.52	83.41	52.87	70.88	81.12	107.6	104.54	188.46	119.98	90.39	97.59	151.35	143.92	83.15	111.9	117.98	126.06	91.85	93.76	139.05	150.28
ATXN3	5.99	3.48	7.83	9.44	5	9.11	9.16	8.85	10.86	10.36	6.64	9.63	11.85	7.34	9.92	7.49	3.81	6.32	4.07	3.92	4.2	3.77	4.39	4.31	4.18	5.79	3.9	3.1	2.94	5.42	4.3	2.87	3.16	3.94	4.52	3.13	3.77	4.38	7.41	4.54	6.45	3.56	6.31	9.56	3.94	7.84	6.8	11.17	6.09
ATXN3L	0	0	0	0	0	0	0	0	0	0	0	0	0	0	0	0	0	0	0	0	0	0.04	0	0	0.03	0	0	0	0	0	0	0	0	0	0	0	0	0	0	0	0	0	0	0	0	0.04	0	0	0
ATXN7	12.48	8.2	11.58	13.36	9.98	13.96	9.92	15.78	14.78	16.7	14.75	11.84	13.02	15.03	16.75	19.76	7.37	14.78	7.77	5.3	9.09	10.03	8.47	9.99	4.89	5.9	7.87	7.49	9.17	11.71	6.49	8.63	6.31	9.32	7.24	11.06	6.76	8.21	10.1	6.95	11.23	7.09	7.82	16.5	7.11	8.71	11.74	15.81	12.94
ATXN7L1	9.78	5.03	6.92	8.78	7.72	6.72	6.16	5.96	5.6	10.14	5.63	9.97	14.38	4.36	9.12	6.9	5.57	5.69	9.6	5.86	4.68	6.47	5.46	4.11	4.84	14.86	8.61	3.6	4.72	5.94	5	3.21	5.44	6.15	7.5	9.14	11.31	6.34	7.92	8.74	8.13	5.82	8.08	11.25	3.69	11.44	8.12	8.16	9.8
ATXN7L2	2.43	3.38	2.86	3.19	6.1	4.54	3.12	4.84	5.02	3.44	1.95	2.99	3.37	1.44	2.63	2.93	3.36	2.85	6.4	3.38	4.11	4.59	5.13	1.94	3.57	3.42	8.47	2.68	2.36	4.3	2.99	2.95	4.85	9.22	4.47	5.68	2.54	4.49	4.47	2.67	4.37	2.35	6.86	6.87	3.15	7.34	2.26	6.3	4.71
ATXN7L3	27.68	33.77	52.32	31.33	44.73	34.34	54.43	24.54	29.86	33.22	28.46	28.07	25.27	33.74	28.7	26.45	35.31	47.65	26.98	48.07	41.14	41.74	44.55	26.21	51.86	67.39	39.68	28.59	26.71	23.04	28.54	25.49	36.05	42.87	61.2	54.41	46.42	33.01	51.64	55.31	90.06	37.63	50.56	49.38	53.54	81.67	49.4	55.37	70.01
ATXN7L3B	42.56	56.34	83.29	77.66	103.13	79.75	78.78	87.41	186.1	92.52	45.21	135.24	76.29	200.98	110.55	58.94	155.38	52.98	71.63	70.12	66.52	72.37	61.84	58.44	55.42	63.82	81.62	106.02	35.85	65.32	90.67	51.63	35.7	77.04	55.11	110.68	162.3	42.15	130.24	67.96	94.52	224.97	66.86	110.86	63.97	107.57	63.02	66.86	91.3
ATXN8OS	0	0	0	0	0	0	0	0	0	0	0	0	0	0	0	0	0	0	0	0	0	0	0	0	0.1	0	0	0	0	0	0	0	0	0	0	0	0	0	0	0	0	0	0	0	0	0	0	0	0
AUH	33.13	8.61	21.77	21.26	20.2	23.08	22.99	21.54	16.68	22.76	26.41	28.18	23.82	23.08	37.28	28.92	17.8	11.39	18.9	10.42	22.83	8.22	9.09	18.06	11.05	5.87	18.91	17.6	24.18	21.35	22.95	18.4	10.18	17.22	7.67	10.02	12.27	11.64	14.33	10.96	18.01	11.91	30.61	25.93	16.43	9.59	15	16.01	7.22
AUNIP	12.25	6.75	6.48	7.46	8.41	7.54	1.21	26.16	6.71	1.2	9.06	12.5	7.06	6.04	4.42	3.76	5.14	1.79	13.49	2.26	4.68	10.72	7.29	7.53	8.18	9.9	12.32	3.03	2.87	5.33	0.71	1.54	8.52	11.58	4.26	8.74	3.73	2.12	3.02	7.99	14.97	9.42	14.94	8.58	4.44	3.43	4.82	10.06	10.06
AUP1	212.33	298.81	206.82	260.03	251.31	180.88	291.81	160.71	153.65	150.74	154.59	211.64	113.92	304.74	150.05	152.33	295.64	122.14	352.9	171.8	204.32	181.5	123.99	232.66	267.02	380.78	307.98	164.67	188.17	242.06	173.64	181.35	221.94	268.12	340.81	267.69	178.62	158.81	184.12	298.02	127.68	284.99	187.94	216.49	174.6	224.81	155.1	170.8	163.08
AURKA	77.79	41.72	116.65	106.8	78.52	33.26	82.31	74.6	302.19	8.56	44.48	69.67	49.17	50.09	32.91	38.89	44.6	11.18	58.8	18.69	37.79	31.35	14.45	29.12	64.95	39.12	77.72	11.24	17.75	65.28	7.91	45.72	30.83	70.94	46.69	28.33	18.2	16.48	23.4	61.5	69.06	51.36	123.07	45.66	63.44	74.69	28.27	51.44	82.12
AURKAIP1	79.68	191.81	86.09	154.07	174.77	79.39	151.34	118	79.56	70.38	126.67	91.2	79.05	91.97	104.22	119.08	221.81	128.05	292.52	154.32	207.16	232.41	183.09	240.86	230.98	227.22	218.21	162.57	199.97	237.71	204.57	197.42	243.66	235.08	122.12	170.6	178.23	170.21	150.59	180.25	218.33	322.4	277.37	107.31	155.65	103.78	191.11	91.98	137.36
AURKAPS1	0.59	0.37	1.38	1.58	0.47	0.75	2.68	0.82	3.4	0.25	0.33	1.14	0.24	1.47	0.49	0.86	0.37	0.31	0.98	0.38	0.1	0.78	0.29	0.72	0.14	1.21	0.33	0.48	0.11	0.36	0.05	0.14	0.45	0.33	0.46	1	0.42	0.19	0.37	0.27	1.81	0.39	0.52	0.27	0.41	2.05	1.28	1.69	0.85
AURKB	51.97	56.93	40.53	55.56	82.54	40.84	15.18	57.78	57.75	9.25	40.43	75.18	22.07	20.44	18.72	31.67	29.5	10.94	112.47	20.18	58.88	48.43	69.19	50.39	123.97	68.62	82.46	15.53	12.44	23.99	12.93	22.8	57.49	79.53	55.1	15.83	7.36	27.17	27.88	50.62	47.64	42.03	72.47	47.03	50.85	57.01	37.46	63.39	88.69
AURKC	0.25	1.62	1.56	1.25	0.67	0.36	0.52	0.11	19.79	0.67	2.02	0.33	0.68	1.42	0.49	0.99	0.68	1.34	0.36	0.69	0.86	1.76	0.64	0.43	0.71	0.62	0.23	0.23	0.32	0.39	0.92	0.7	2.19	0.65	0.97	1.24	0.64	1.18	1	1.08	0.97	0.5	0.19	0.08	0.25	0.59	2.57	6.16	0.16
AUTS2	0.73	3.16	7.89	0.82	11.89	1.59	4.97	5.32	5.52	15.2	11.59	1.84	10.18	11.56	14.47	4.1	3.14	11	15.57	9.73	10.82	1.77	7.33	4.15	2.22	6.88	2.86	4.94	8.18	2.61	4.09	9.7	3.7	8.19	17.36	3.99	12.11	11.41	11.57	3.23	2.12	2.72	6.36	6.39	7.72	3.46	10.58	6.61	9.48
AVEN	17.69	18.38	5.94	18.11	9.99	19.13	8.77	17.84	7.88	15.24	24.1	9.21	21.23	13.48	10.65	16.92	12.92	14.24	10.19	17.42	17.74	12.33	12.01	14.22	14.92	12.37	18.04	6.18	9.52	7.88	8.02	12.65	19.16	15.59	11.01	7.31	15.95	15.11	19.26	11.83	23.76	17.5	16.26	17.05	11.43	30.56	17.25	12.02	17.48
AVIL	0.61	0.35	0.86	0.37	1.52	0.76	0.99	1.93	2.37	3.75	0.78	9.25	1.43	2.89	3.01	2.17	1.47	0.86	1.03	0.58	0.41	0.9	0.78	0.74	0.47	0.8	0.16	1.59	0.61	0.56	1.13	0.24	0.59	1.3	5.33	0.4	2.25	0.6	3.55	1.22	0.67	1.15	1	3.2	0.63	3.21	1.54	1.11	32.6
AVL9	54.7	10.04	36.62	37.3	34.8	33.22	37.61	24.06	34.17	24.78	29.94	54.99	57.65	43.54	50.29	28.28	16.42	11.06	19.94	10.54	17.64	17.13	11.5	14.2	18.31	22.39	24.54	11.5	12.38	17.28	10.71	12.22	13.94	20.13	29.78	26.62	32.24	9.36	21.27	24.33	34.72	24.49	34.5	45.51	13.88	56.32	23.35	32.41	39.61
AVP	0	0	0	0.1	0.1	0	0	0.12	0.12	0	0	0	0	0	0	0	0	0	0	0	0	0	0	0	0	0.31	0	0	0	0	0	0	0	0.11	0	0	0	0.39	0	0	0	0.11	0	0	0	0	0.11	0.34	0.11
AVPI1	18.48	130.25	43.75	34.93	51.59	46.19	78.58	74.16	53.48	35.84	44.19	37.4	33.52	31.1	94.16	133.27	58.55	91.63	44.17	99.53	97.8	39.91	61.19	38.73	92.82	17.53	148.21	24.86	100.65	126.47	37.45	188.24	86.89	51.55	64.99	58.77	29.38	44.63	53.79	31.8	54.09	61.65	33.7	19.83	34.59	32.64	33.95	41.42	88.48
AVPR1A	0.69	0.39	5.02	0.84	1.45	1.07	1.17	1.17	2.62	7.63	1.83	0.7	2.49	5.13	4.06	1.86	0.54	1.24	1.63	4.3	0.49	0.71	0.71	1.02	0.59	0.89	0.24	0.47	0.27	0.24	0.45	0.67	0.14	1.04	0.5	0.21	0.93	1.34	4.68	0.24	0.79	1.14	0.82	0.5	1.82	0.46	0.9	2.03	0.4
AVPR1B	0	0	0	0.03	0	0.04	0	0.03	0.07	0	0	0.04	0	0	0.13	0	0.05	0	0	0	0	0	0	0	0	0	0.07	0	0.1	0.17	0.09	0	0	0.07	0.12	0	0.03	0.04	0	0	0	0	0	0.05	0.5	0	0.03	0	0
AVPR2	0.19	0.19	0.5	0.36	0.23	0.11	0.33	0.2	0.2	2.68	0.09	0.04	0.1	0.22	0.58	0.31	0.82	1.84	0.19	3.44	0.77	0.5	2.2	0.17	0.52	0.55	0.26	0.88	0.62	0.47	1.31	1.49	0.14	0.88	1.89	0.8	0.47	4.61	2.06	12.69	0.18	1.5	0.12	0.2	1.33	1.38	0.45	3.49	0.1
AWAT1	0	0	0	0.04	0	0	0	0.04	0	0.09	0	0	0	0	0	0	0	0	0	0	0.04	0.05	0	0	0.04	0.12	0	0	0.61	0	0	0	0	0	0	0	0	0	0	0	0	0	0.05	0	0	0	0	0	0
AWAT2	0	0	0.03	0.09	0	0	0	0.03	0	0.03	0	0.13	0	0.05	0	0.03	0	0	0.09	0.11	0.02	0	0	0	0.05	0	0	0	0	0	0	0	0	0	0	0	0.02	0	0	0	0	0.11	0	0	0	0	0	0	0
AXDND1	0.03	0.16	0.24	0.07	2.14	0.37	0	0.38	0.22	3.24	0.1	0.12	7.01	0.09	0.74	0.78	7.19	0.32	0.26	1.81	3.1	0	0.67	0	0	0.02	0.42	2.37	5.84	5.34	4.58	2.56	0	1.14	0.65	0.08	2.06	0.57	1.46	0.03	0.03	0.49	0.29	0.93	0.2	0.07	0.06	0.09	0.06
AXIN1	37.04	40.44	25.23	32.29	38.58	27.57	16.93	34.47	32.64	24.21	18.77	25.88	20.09	37.65	27.85	29.48	26	29.31	57.92	31.31	37.28	31.85	26.89	15.51	26.34	58.95	41.6	17.6	19.85	18.62	15.96	25.8	23.35	38.1	27.24	47.33	31.61	24	35.86	35.28	92.49	29.38	63.79	44.81	42.38	20.27	20.2	34.08	34.79
AXIN2	234.15	4.85	7.6	1.42	11.04	6.92	573.96	7.66	18.49	8.5	9.02	32.01	4.99	17.95	37.64	124.47	7.41	4.06	77.73	7.43	9.95	7.19	1.79	1.89	0.45	33.38	1.37	11.2	4.36	9.78	13.34	6.91	18.46	19.82	2.18	20.42	4.37	6.58	6.33	1.38	10.75	23.14	43.9	23.28	12.44	205.53	12.6	8.94	173.08
AXL	7.84	25.05	37.17	71.6	31.9	52.07	11.9	17.33	12.79	56.42	33.53	9.03	10.84	26.47	30.89	32.1	11.85	19.59	24.33	47.8	22.29	30.8	21.36	14.7	214.83	9.86	6.28	11.7	16.01	12.38	14.05	17.39	28.75	24.87	16.28	82.37	40.15	69.82	55.23	162.94	10.98	16.35	7.63	23.62	55.21	17.39	52.86	55.62	9.58
AZGP1	153.79	9.21	60.78	20.81	80	8.29	1943.79	25.83	378.03	4.91	104.86	120	20.67	112.59	104.59	70.84	112.24	0.67	408.03	99.59	78.78	0.51	32.68	0.22	10.57	6.3	125.9	123.36	111.07	130.56	134.19	77.5	41.84	54.2	51.77	0.44	353.46	8.22	14.04	7.62	658.52	625.83	340.52	553.33	73.79	165.21	4.42	6.39	309.22
AZGP1P1	0.42	0	0.71	0.41	0.19	0.06	5.74	0.16	0.69	0.06	0.04	1.23	0.26	0.32	0.41	0.52	0.32	0	0.88	0.07	0	0.06	0.08	0	0.05	0.29	0.11	0.43	0	0.11	0.2	0	0.13	0.15	0.37	0	0.51	0	0.06	0	3	0.26	1.14	2.62	0	0.17	0.25	0.41	0.5
AZI2	22.49	20.37	24.59	30.66	35.14	34.87	32.95	24.54	37.46	51.52	42.02	32.04	40.88	42.56	44.25	40.19	31.79	29.56	19.44	26.73	29.98	25.25	21.66	42.69	21.91	41.55	28.95	18.78	19.59	32	21.49	17.83	19.65	20.37	41.55	44.51	25.97	26.8	38.95	24.36	20.54	42.33	21.46	36.64	33.93	75.3	27.5	40.04	23.4
AZIN1	117.13	72.35	135.08	47.64	118.11	116.02	174.57	195.6	116.98	91.95	85.12	103.84	158.39	105.09	72.39	94.21	49.19	67.88	63.31	41.24	60.18	45.9	55.52	50.27	273.11	86.67	86.38	31.34	46.67	52.92	42.97	39.96	47.56	79.49	68.4	62.18	54.82	43.62	87.47	91.51	135.38	48.93	106.9	143.81	73.56	189.43	70.07	89.23	107.27
AZIN1-AS1	1.77	1.92	0.69	0.21	0.75	0.27	2.08	1.4	0.84	0.35	0.21	1.07	1.01	0.73	1.22	0.74	1.36	0.33	2.46	2.11	0.56	1	1.65	0	6.41	4.29	1.41	1.96	0.46	0.99	1.04	1.74	0.41	1.74	1.98	5.94	0.79	1.8	1.29	1.81	2.97	1.22	1.48	1.32	3.38	1.2	1.09	0.9	0.16
AZIN2	0.61	2.46	1.28	0.78	3.86	1.48	3.07	1.74	1.41	3.33	1.57	0.43	0.48	2.52	3.63	1.82	0.5	0.88	1.13	4.74	0.99	3.98	2.01	2.9	2.04	0.66	1.67	1.3	0.72	2.55	1.14	1.28	1.09	3.26	3.02	5.21	4.97	7.77	4.41	3.36	1.14	2.09	0.45	1.61	4.45	1.92	2.87	5.26	0.8
AZU1	0	0.65	0.07	0	0.13	0	0	0	0	0.15	0	0	0	0	0.14	0.24	0	0.07	0.07	0.19	0.54	0.17	0	0	0.38	0.39	0	0	0	0	0.09	0	0.09	0.21	0.24	0.14	0.25	0.25	0.3	0.2	0.07	0.07	0	0	0.84	0	0.27	0	0
B2M	5223.51	5553.65	5904.95	3789.17	3325.34	3704.53	3710.75	4182.2	3337.16	5924.18	6108.83	3850.72	6223.02	3771.16	5888.68	7770.16	3645.74	3165.47	2902.16	3746.86	4204.55	4456.63	4756	9190.27	3668.24	3258.21	2608.76	7271.69	6876.59	5111.35	6505.76	7148.3	7525.32	3230.26	3385.96	3730.21	3283.39	4664.2	4212.34	4857.77	2313.39	1919.78	2497.98	3932.64	4730.36	3192.5	4943.41	3129.94	4186.57
B3GALNT1	0.85	2.73	3.76	9.82	5.71	13.17	2.16	2.94	10.16	16.55	3.84	14.06	8.03	10.01	18.48	15.85	7.04	6.12	8.67	6.4	0.98	14.19	4.9	17.94	4.66	14.1	5.62	2.6	0.92	5.94	4.05	1.85	0.75	2.73	15.25	15.03	7.86	4.14	10.7	22.1	7.28	16.64	0.98	8.21	8.73	5.94	2.01	7.84	0.5
B3GALNT2	22.27	12.58	24.06	18.86	16.73	37.7	23.41	17.14	32.76	19.42	21.81	37.79	27.09	21.41	29.05	26.97	10.45	15.61	8.64	8.51	10.27	12.75	13.04	11.71	8.72	21.62	15	4.62	6.29	11.15	6.18	5.75	9.99	9.55	14.88	22.16	13.61	7.94	19.08	15.27	19.47	11.9	16.65	21.25	9.41	43.6	22.26	28.08	27.04
B3GALT1	0	0	0.22	0.11	0.08	0.34	0.81	0	0.3	0.03	0.02	0.44	0.24	0.19	0.05	0.41	0.04	0.08	0	0.11	0	0	0	0.13	0.1	0	0	0	0.08	0.03	0	0	0	0.03	0.5	0	4.02	0	0.14	0	0.03	0.05	0.03	0.08	0.24	0	0.13	0.61	0.35
B3GALT2	0.34	0.09	0.75	0.27	0.58	0.22	2.28	0.94	0.7	0.62	0.38	1.99	0.32	0.32	2.04	0.76	0.75	0.23	0.2	0.49	0.37	6.72	1.02	0.02	0.13	4.35	0.07	0.73	1.72	0.39	0.97	0.59	0.35	0.22	3.35	0.73	2.69	0.6	0.33	0.09	0.28	0.16	0.15	0.81	1.55	2.96	0.36	0.81	0.48
B3GALT4	5.95	29.23	6.35	3.16	13.34	1.84	16.25	6.16	16.91	11.83	5.21	3.03	7.55	11.9	9.66	7.12	14.22	22.95	16.13	20.44	19.23	14.01	9.16	10.74	18.3	11.52	7.04	20.19	14.61	20.66	25.08	21.15	4.27	12.81	13.89	16.9	14.55	21.9	17.36	10.96	15.37	11.14	3.76	22.34	22.28	16.3	8.49	7.61	1.18
B3GALT5	4.65	0.64	24.54	18.58	90.56	0.24	0	8.25	1.45	13.33	33.51	26.25	0.23	14	5.77	8.63	15.31	4.42	3.19	20.51	50.87	0.46	24.33	2.56	1.71	0.74	0.51	15.37	25.98	15.4	16.6	19.78	16.02	29.13	6.34	0.16	4.5	21.39	19.93	1.72	26.14	1.61	5.18	78.36	15.38	10.35	1.69	16.68	7.9
B3GALT5-AS1	0.12	0.12	1.19	0.31	1.18	0.09	0.18	0.17	0.4	0.05	0.64	0.21	0	0.31	2.45	2.48	3.97	0.22	1.44	0.24	0.11	0.16	0.39	3.23	0.4	0.73	0	1.75	1.5	3.78	2.5	0.16	0	1.03	3.99	0.63	0.16	0.31	0.8	0	3.09	0.57	0.2	2.85	10.02	2.76	0.04	0.96	0.13
B3GALT6	11.04	16.92	12.35	15.83	27.03	13.39	16.03	14.07	8.28	15.44	10.43	15.2	10.2	12.89	17.73	10.94	15.62	13.34	36.97	19.06	24.51	13.39	21.41	10.87	20.89	59.45	17.25	11.25	8.44	20.93	12.11	9.1	20.53	22.19	15.35	54.72	19.12	22.57	27.61	17.57	35.03	17.5	23.41	22.36	20.32	29.2	35.56	14.32	11.58
B3GALTL	1.26	4.89	8.02	6.55	4.27	6.96	4.27	8.95	7.94	7.95	6.21	2.32	11.02	7.11	6.48	5.78	2.68	3.46	2.02	4.9	3.41	7.31	1.48	4.75	4.88	4.55	1.35	2.06	2.1	3.79	2.39	2.39	0.81	2.56	9.8	4.59	5.43	2.34	6.96	3.4	8.43	2.02	5.47	5.34	5.29	5.7	2.44	6.7	6.48
B3GAT1	0.17	0.91	0.51	0.03	0.12	0.05	0.06	0.36	1.35	0.24	0.46	0.18	0.08	4.75	2.18	1.37	6.05	0.13	0.49	0.11	0.33	1.85	0.69	2.79	0.12	0.11	0.03	11.79	0.23	0.88	2.98	0.8	0.46	0.48	1.36	0.15	4.35	1.29	0.24	0.09	0.15	0.07	0.11	0.07	0.19	0.67	0.87	0.39	0.18
B3GAT2	0	0	0	0	0	0.07	0	0	0	0.11	0	0	0	0	0.03	0	0	0	0	0	0	0.07	0	0	0	0.09	0	0	0	0	0	0	0.04	0	0.04	0	0.06	0.04	0	0.03	0	0	0.04	0	0	0.03	0	0.19	0
[truncated: 24,771 more rows]
[truncated: 179 more columns]
